# Supplementary material for: Spatiotemporal Regulation of Circular RNA Expression During Ningxiang Pig Skeletal Muscle, Subcutaneous Fat, and Liver Development
Source: Research Square preprint supplement (doi:10.21203/rs.3.rs-111082/v1), 2020-11-20
Supplement: Supplementary file 1 [file 11ea10cd83d0e2e228b1c8c7.xls]

## Sheet: N30D_L vs N90D_L_DEcircRNAs
circRNA id	Host gene id	FC(N90D_L/N30D_L)	Log2FC(N90D_L/N30D_L)	Pvalue	Padjust	Significant	Regulate	N30D_L1	N30D_L2	N30D_L3	N90D_L1	N90D_L2	N90D_L3	N30D_L	N90D_L	gene_name	description	nr_hit_name
Chr01_103594729_103605128		0.0484299	-4.36796	0.0172328	0.133942	yes	down	0.0544315	0.0259219	0	0.0145174	0	0	0.0267845	0.00483914	#N/A	#N/A	#N/A
Chr01_113113103_113118487	Pig.03374	0.27338	-1.87102	0.00574741	0.060165	yes	down	0.0884511	0.0453634	0.140021	0.0653284	0.0927601	0.0970628	0.0912784	0.0850504	ZCCHC2-201	zinc finger CCHC domain-containing protein 2 [Sus scrofa]	XP_020955289.1
Chr01_11575048_11579583		0.454099	-1.13892	0.0258291	0.175254	yes	down	0.115667	0.0583243	0.0933472	0.130657	0.0998955	0.194126	0.0891128	0.141559	#N/A	#N/A	#N/A
Chr01_1187216_1191546	Pig.03783	2.19944	1.13714	0.0180245	0.137731	yes	up	0.0816472	0.0842462	0.160024	0.863787	0.991819	0.701839	0.108639	0.852482	DNAJC25-201	dnaJ homolog subfamily C member 25 [Sus scrofa]	XP_020923138.1
Chr01_124899674_124913642	Pig.10761	0.407529	-1.29502	0.0211934	0.154141	yes	down	0.0544315	0.0194414	0.0866795	0.0435523	0.128437	0.0522646	0.0535175	0.0747513	EIF2AK4-202	eIF-2-alpha kinase GCN2 isoform X1 [Sus scrofa]	XP_020953532.1
Chr01_128470328_128472537	Pig.14318	0.392142	-1.35055	0.000283701	0.00538933	yes	down	0.251746	0.123129	0.346718	0.333901	0.256874	0.373319	0.240531	0.321364	MFAP1-201	PREDICTED: microfibrillar-associated protein 1 isoform X1 [Cricetulus griseus]	XP_003815004.1
Chr01_129539644_129544125	MSTRG.1761,Pig.14306	6.57285	2.71652	1.45689e-06	6.6515e-05	yes	up	0.0476275	0.0194414	0.0600089	0.798458	1.01323	1.06022	0.0423593	0.957303	#N/A	#N/A	#N/A
Chr01_130102143_130113674		14.6096	3.86884	0.0466103	0.249491	yes	up	0	0	0	0.0435523	0.0856247	0.0671974	0	0.0654581	#N/A	#N/A	#N/A
Chr01_134990236_135001147	Pig.02305	22.0015	4.45953	0.00100657	0.0152598	yes	up	0	0	0	0.0580697	0.156979	0.0821301	0	0.0990595	TRPM7-201	transient receptor potential cation channel subfamily M member 7 isoform X1 [Sus scrofa]	XP_023989567.2
Chr01_140717158_140759222	Pig.02266	0.0322975	-4.95244	0.0117892	0.101992	yes	down	0	0.0259219	0	0	0	0	0.00864064	0	TEX9-202	testis-expressed sequence 9 protein [Sus scrofa]	NP_001231528.1
Chr01_146320093_146329661	Pig.02237	14.2229	3.83014	0.0217816	0.156949	yes	up	0	0	0	0.050811	0.0642185	0.0746637	0	0.0632311	VPS13C-201	vacuolar protein sorting-associated protein 13C isoform X2 [Sus scrofa]	XP_020950024.1
Chr01_149573571_149585170		501.198	8.96924	0.000417484	0.00731674	yes	up	0	0	0	1.29205	3.004	2.44897	0	2.24834	#N/A	#N/A	#N/A
Chr01_149573571_149621592		99.8557	6.64177	7.78634e-07	3.8111e-05	yes	up	0	0	0	0.406488	0.585102	0.35092	0	0.447503	#N/A	#N/A	#N/A
Chr01_149573571_149644642		81.9629	6.3569	4.31843e-06	0.000167437	yes	up	0	0	0	0.254055	0.44953	0.395718	0	0.366434	#N/A	#N/A	#N/A
Chr01_149643366_149644642		405.765	8.6645	9.3978e-11	1.42424e-08	yes	up	0	0	0	1.01622	2.19056	2.23245	0	1.81308	#N/A	#N/A	#N/A
Chr01_150306573_150308258	Pig.02204	13.6324	3.76897	0.0183792	0.139073	yes	up	0	0	0	0.0580697	0.0642185	0.059731	0	0.0606731	TXNL1-202	thioredoxin-like protein 1 isoform X1 [Castor canadensis]	XP_020042489.1
Chr01_151460832_151461522	Pig.02203	0.016843	-5.8917	0.0254175	0.173921	yes	down	0.0544315	0.012961	0	0	0	0	0.0224641	0	TCF4-206	transcription factor 4 isoform X1 [Sus scrofa]	XP_020949090.1
Chr01_151532417_151542472	Pig.02203	0.135396	-2.88475	0.00159902	0.0225649	yes	down	0.0816472	0.0388829	0.0466736	0	0.0285416	0.0522646	0.0557346	0.0269354	TCF4-206	transcription factor 4 isoform X1 [Sus scrofa]	XP_020949090.1
Chr01_151532417_151559030	Pig.02203	0.140986	-2.82637	0.000535089	0.00880951	yes	down	0.108863	0.0712853	0.0933472	0.0145174	0.0499477	0.0746637	0.0911651	0.0463763	TCF4-206	transcription factor 4 isoform X1 [Sus scrofa]	XP_020949090.1
Chr01_155784406_155807734		0.391744	-1.35202	5.36144e-10	6.33232e-08	yes	down	0.870904	0.479555	0.753445	1.1251	1.11312	0.67944	0.701301	0.972554	#N/A	#N/A	#N/A
Chr01_160890998_160891782		0.415291	-1.26781	0.00138335	0.0200956	yes	down	0.326589	0.155531	0.286709	0.326642	0.328228	0.455449	0.256277	0.370106	#N/A	#N/A	#N/A
Chr01_162166054_162169510	Pig.08979	0.0421153	-4.56951	6.04001e-15	2.34395e-12	yes	down	0.503491	0.550841	0.773448	0.0871046	0.178385	0.0223991	0.60926	0.0959628	SETBP1-201	SET-binding protein isoform X1 [Sus scrofa]	XP_013844009.2
Chr01_16519178_16551432	Pig.03897	0.0244211	-5.35573	0.00489369	0.0538874	yes	down	0	0.012961	0.0333383	0	0	0	0.0154331	0	RNF38-202	E3 ubiquitin-protein ligase RNF38 isoform X1 [Sus scrofa]	XP_013849110.2
Chr01_173364048_173366484	Pig.07316	4.31729	2.11012	0.0209694	0.153266	yes	up	0	0	0.0533413	0.297607	0.242603	0.201592	0.0177804	0.247268	BCKDHB-201	2-oxoisovalerate dehydrogenase subunit beta, mitochondrial isoform X1 [Sus scrofa]	XP_020938559.1
Chr01_176366641_176466186	Pig.00707	0.0156145	-6.00097	0.00220532	0.0289409	yes	down	0.0272157	0.0259219	0.0133353	0	0	0	0.0221577	0	ME1-201	NADP-dependent malic enzyme [Sus scrofa]	XP_001924368.2
Chr01_176448874_176463214	Pig.00707	0.0366542	-4.76988	0.0245167	0.169035	yes	down	0.0340197	0	0	0	0	0	0.0113399	0	ME1-201	NADP-dependent malic enzyme [Sus scrofa]	XP_001924368.2
Chr01_176448874_176466186	Pig.00707	0.0125199	-6.31964	9.706e-15	3.51551e-12	yes	down	1.10904	0.2657	0.31338	0	0.0356769	0.0373319	0.562707	0.0243363	ME1-201	NADP-dependent malic enzyme [Sus scrofa]	XP_001924368.2
Chr01_176448874_176514079	Pig.00707	0.0263553	-5.24576	0.04295	0.23933	yes	down	0.0272157	0.012961	0	0	0	0	0.0133922	0	ME1-201	NADP-dependent malic enzyme [Sus scrofa]	XP_001924368.2
Chr01_181216304_181231875	Pig.00728	0.011176	-6.48345	0.0274081	0.182039	yes	down	0.0340197	0.0259219	0.0400059	0	0	0	0.0333158	0	LAMA4-201	LOW QUALITY PROTEIN: laminin subunit alpha-4 [Sus scrofa]	XP_013848215.2
Chr01_181216304_181256568	Pig.00728	0.00799362	-6.96694	0.00375821	0.0436526	yes	down	0.0204118	0.0648048	0.0333383	0	0	0	0.0395183	0	LAMA4-201	LOW QUALITY PROTEIN: laminin subunit alpha-4 [Sus scrofa]	XP_013848215.2
Chr01_182096958_182103661	Pig.00734	0.203825	-2.2946	0.0239212	0.166407	yes	down	0.0272157	0.0194414	0.0933472	0.0362936	0.0285416	0.0298655	0.0466681	0.0315669	REV3L-201	DNA polymerase zeta catalytic subunit isoform X1 [Sus scrofa]	XP_020946897.1
Chr01_182615642_182642829	Pig.00740	17.9081	4.16254	0.0032591	0.0396122	yes	up	0	0	0.0133353	0.304866	0.285416	0.216525	0.0044451	0.268935	CDK19-201	PREDICTED: cyclin-dependent kinase 19-like isoform X1 [Elephantulus edwardii]	XP_020946795.1
Chr01_182642754_182716683	Pig.00740	63.7445	5.99423	8.41477e-06	0.000296866	yes	up	0	0	0	0.28309	0.363905	0.209058	0	0.285351	CDK19-201	PREDICTED: cyclin-dependent kinase 19-like isoform X1 [Elephantulus edwardii]	XP_020946795.1
Chr01_182760362_182767594	Pig.00740	4.93495	2.30304	4.35252e-05	0.00117066	yes	up	0.0204118	0.0259219	0.0466736	0.537145	0.699268	0.403184	0.0310024	0.546532	CDK19-201	PREDICTED: cyclin-dependent kinase 19-like isoform X1 [Elephantulus edwardii]	XP_020946795.1
Chr01_185593158_185595368		58.733	5.8761	0.0417916	0.236086	yes	up	0	0	0	0.188727	0.363905	0.238924	0	0.263852	#N/A	#N/A	#N/A
Chr01_193074441_193076656	Pig.00796	19.0373	4.25076	0.012212	0.104959	yes	up	0	0	0	0.0725871	0.156979	0.0298655	0	0.0864771	PNISR-201	SR rich protein, partial [Homo sapiens]	NP_001106910.1
Chr01_193515797_193548029	Pig.00800	0.0211383	-5.564	0.0187468	0.140873	yes	down	0.0204118	0.012961	0.020003	0	0	0	0.0177919	0	FBXL4-202	F-box/LRR-repeat protein 4 [Sus scrofa]	NP_001165223.1
Chr01_207420625_207465177	Pig.00864	12.0089	3.58603	2.47229e-07	1.40574e-05	yes	up	0.0408236	0.0453634	0.0800119	2.36634	4.35259	0.589843	0.0553996	2.43626	RIMS1-201	regulating synaptic membrane exocytosis protein 1 isoform X9 [Sus scrofa]	XP_020928548.1
Chr01_207420625_207476422	Pig.00864	31.5898	4.98139	0.0207705	0.152094	yes	up	0	0	0	0.174209	0.256874	0	0	0.143694	RIMS1-201	regulating synaptic membrane exocytosis protein 1 isoform X9 [Sus scrofa]	XP_020928548.1
Chr01_214379127_214383038		5.68144	2.50626	2.32717e-11	4.51553e-09	yes	up	0.0884511	0.0648048	0.0933472	1.83645	1.82666	1.32155	0.082201	1.66155	#N/A	#N/A	#N/A
Chr01_214380720_214383035		20.1807	4.3349	0.0427199	0.238783	yes	up	0	0	0	0.123398	0.0856247	0.059731	0	0.0895846	#N/A	#N/A	#N/A
Chr01_214380720_214383038		5.66333	2.50165	6.10636e-13	1.5798e-10	yes	up	0.163294	0.0712853	0.166691	3.23739	2.319	2.27724	0.133757	2.61121	#N/A	#N/A	#N/A
Chr01_214381281_214383035		10.9803	3.45684	0.00222319	0.0291051	yes	up	0	0.0194414	0	0.399229	0.214062	0.261323	0.00648048	0.291538	#N/A	#N/A	#N/A
Chr01_214381281_214383038		7.00505	2.8084	7.90095e-06	0.000282407	yes	up	0	0.0388829	0.0400059	0.754906	0.528019	0.769036	0.0262963	0.683987	#N/A	#N/A	#N/A
Chr01_225334410_225381253	Pig.04000	0.0115285	-6.43866	0.000406187	0.00716498	yes	down	0.0204118	0.012961	0.0733442	0	0	0	0.0355723	0	LAMA2	LOW QUALITY PROTEIN: laminin subunit alpha-2 [Sus scrofa]	XP_020940122.1
Chr01_225853573_225876920	Pig.04001	0.00525147	-7.57306	3.31165e-05	0.000922677	yes	down	0.0408236	0.0324024	0.160024	0	0	0	0.0777499	0	ARHGAP18-201	rho GTPase-activating protein 18 isoform X4 [Sus scrofa]	XP_020944089.1
Chr01_225864275_225876920	Pig.04001	0.127268	-2.97406	0.0215385	0.155817	yes	down	0.0204118	0.0388829	0.0400059	0	0.0499477	0	0.0331002	0.0166492	ARHGAP18-201	rho GTPase-activating protein 18 isoform X4 [Sus scrofa]	XP_020944089.1
Chr01_225868396_225876920	Pig.04001	0.126418	-2.98372	0.02264	0.161396	yes	down	0.0408236	0	0.0333383	0.0145174	0	0.0149327	0.0247206	0.00981672	ARHGAP18-201	rho GTPase-activating protein 18 isoform X4 [Sus scrofa]	XP_020944089.1
Chr01_228240804_228242964	Pig.04015	113.07	6.82108	5.38442e-07	2.78605e-05	yes	up	0	0	0	0.631508	0.592237	0.291189	0	0.504978	MOXD1-201	LOW QUALITY PROTEIN: DBH-like monooxygenase protein 1 [Sus scrofa]	XP_001926966.2
Chr01_229247351_229282615	MSTRG.2920,Pig.04030	0.0586728	-4.09116	0.0169837	0.133257	yes	down	0.0204118	0	0	0	0	0	0.00680393	0	#N/A	#N/A	#N/A
Chr01_237261552_237265394	Pig.05210	15.3558	3.94071	7.68238e-06	0.000280123	yes	up	0	0.012961	0.020003	0.67506	0.63505	0.522646	0.010988	0.610919	ADGRG6-201	adhesion G-protein coupled receptor G6 isoform X1 [Sus scrofa]	XP_020942830.1
Chr01_245876855_245917642	Pig.17502	61.7037	5.94729	0.000445419	0.00770689	yes	up	0	0	0	0.217761	0.406717	0.209058	0	0.277846	ESR1-201	estrogen receptor isoform X1 [Sus scrofa]	XP_020938661.1
Chr01_245959680_245960754	Pig.17502	159.612	7.31842	1.34335e-07	8.02024e-06	yes	up	0	0	0	0.435523	1.11312	0.612243	0	0.720295	ESR1-201	estrogen receptor isoform X1 [Sus scrofa]	XP_020938661.1
Chr01_248722322_248724509	MSTRG.3212,Pig.09621,MSTRG.3214	0.0183637	-5.767	0.0265794	0.178499	yes	down	0.0136079	0	0.0600089	0	0	0	0.0245389	0	#N/A	#N/A	#N/A
Chr01_250207988_250284542	Pig.09625	4.6044	2.20301	0.00474058	0.0525624	yes	up	0.0476275	0	0.0133353	0.261314	0.321093	0.35092	0.020321	0.311109	ARID1B-201	AT-rich interactive domain-containing protein 1B isoform X5 [Sus scrofa]	XP_020927546.1
Chr01_250459825_250460068	Pig.09625	0.249497	-2.00291	0.0238055	0.166241	yes	down	0.0204118	0.0712853	0.0400059	0.0435523	0.0214062	0.0671974	0.043901	0.0440519	ARID1B-201	AT-rich interactive domain-containing protein 1B isoform X5 [Sus scrofa]	XP_020927546.1
Chr01_251561636_251563858		0.309291	-1.69296	0.00726629	0.0725694	yes	down	0.0884511	0.0972072	0.193362	0.210503	0.107031	0.0970628	0.12634	0.138199	#N/A	#N/A	#N/A
Chr01_251787914_251799602	MSTRG.3249,Pig.09636	8.23455	3.04169	0.0416682	0.236086	yes	up	0	0.012961	0	0.0943633	0.264009	0.104529	0.00432032	0.154301	#N/A	#N/A	#N/A
Chr01_253252224_253300125	Pig.09656	0.0152611	-6.03399	0.044478	0.243843	yes	down	0.0204118	0.0194414	0.0333383	0	0	0	0.0243972	0	SLC22A3-201	solute carrier family 22 member 3 isoform X1 [Sus scrofa]	XP_003121154.1
Chr01_253340828_253344572	MSTRG.3284,Pig.09657	74.6811	6.22267	0.000930921	0.0143684	yes	up	0	0	0	0.297607	0.585102	0.134395	0	0.339035	#N/A	#N/A	#N/A
Chr01_3467978_3519068	Pig.03801	0.337544	-1.56685	0.00914964	0.0846848	yes	down	0.108863	0.0388829	0.100015	0.0871046	0.0784893	0.119462	0.0825869	0.0950186	TMEM245-202	transmembrane protein 245 isoform X1 [Sus scrofa]	XP_005660377.1
Chr01_36216621_36217740	Pig.03295	0.220524	-2.18099	0.00128244	0.0187803	yes	down	0.0612354	0.168492	0.160024	0.0798458	0.178385	0.0821301	0.129917	0.113454	GLIS3-201	zinc finger protein GLIS3 isoform X1 [Sus scrofa]	XP_020930038.1
Chr01_36216621_36224533	Pig.03295	0.181546	-2.46159	0.00155465	0.022111	yes	down	0.0272157	0.0712853	0.0800119	0.0217761	0.0570831	0.0447982	0.0595043	0.0412192	GLIS3-201	zinc finger protein GLIS3 isoform X1 [Sus scrofa]	XP_020930038.1
Chr01_37897808_37898245	Pig.03277	5.38502	2.42895	0.00155455	0.022111	yes	up	0.0476275	0	0.0800119	0.471816	0.74208	0.963162	0.0425465	0.725686	KIAA2026-201	uncharacterized protein KIAA2026 homolog isoform X1 [Sus scrofa]	XP_003121963.3
Chr01_47916059_47918028	Pig.03256	0.0162706	-5.94159	8.20693e-10	9.09964e-08	yes	down	0.129275	0.174973	0.173359	0	0	0.0298655	0.159202	0.00995516	BNC2-202	zinc finger protein basonuclin-2 isoform X1 [Sus scrofa]	XP_020918949.1
Chr01_50816744_50838879	Pig.16751,MSTRG.668	0.375033	-1.41491	0.0369857	0.21818	yes	down	0.0544315	0.0777657	0.0866795	0.101622	0.0998955	0.104529	0.0729589	0.102016	#N/A	#N/A	#N/A
Chr01_50907637_50907775	Pig.16750,MSTRG.668	0.0855634	-3.54686	1.51105e-05	0.00049159	yes	down	0.0748433	0.0907267	0.166691	0.0798458	0.0214062	0	0.110754	0.0337507	#N/A	#N/A	#N/A
Chr01_5518745_5538581		0.00912542	-6.77589	0.0264072	0.177562	yes	down	0.0612354	0.0324024	0.0266706	0	0	0	0.0401028	0	#N/A	#N/A	#N/A
Chr01_568863_590789	Pig.03778	4.78461	2.2584	0.0418451	0.236086	yes	up	0.0340197	0	0	0.210503	0.156979	0.171727	0.0113399	0.179736	PTBP3-202	polypyrimidine tract-binding protein 3 isoform X4 [Sus scrofa]	XP_020939972.1
Chr01_64609502_64632618	Pig.05408	0.173456	-2.52736	0.00572752	0.0600726	yes	down	0.0340197	0.0259219	0.0333383	0.0217761	0.0214062	0.0149327	0.0310933	0.0193717	MNAT1-201	CDK-activating kinase assembly factor MAT1 [Sus scrofa]	NP_001159788.1
Chr01_70402333_70402851	Pig.05363	0.11837	-3.07862	0.0146767	0.119731	yes	down	0.0204118	0.0324024	0.0466736	0	0.0214062	0.0223991	0.0331626	0.0146018	SAMD4A-202	protein Smaug homolog 1 isoform X1 [Sus scrofa]	XP_020957891.1
Chr01_71798631_71831568	Pig.02917	0.0744832	-3.74694	1.67741e-06	7.2907e-05	yes	down	0.122471	0.123129	0.0800119	0.0145174	0.0570831	0.0223991	0.108537	0.0313332	DDHD1-201	phospholipase DDHD1 isoform X5 [Sus scrofa]	XP_003121845.1
Chr01_72177477_72180594	Pig.02913	24.125	4.59246	0.012356	0.10555	yes	up	0	0	0	0.101622	0.0998955	0.119462	0	0.106993	PSMC6-201	26S protease regulatory subunit 10B [Sus scrofa]	XP_001928782.2
Chr01_72178143_72180594	Pig.02913	16.6513	4.05756	0.0277755	0.183582	yes	up	0	0	0	0.0871046	0.0428123	0.0895965	0	0.0731711	PSMC6-201	26S protease regulatory subunit 10B [Sus scrofa]	XP_001928782.2
Chr01_72779231_72783251	Pig.02907	0.0057064	-7.4532	2.33298e-09	2.30456e-07	yes	down	0.292569	0.155531	0.266706	0	0.0142708	0	0.238269	0.00475693	NID2-201	nidogen-2 isoform X1 [Sus scrofa]	XP_020957573.1
Chr01_79239304_79239909	Pig.02867	25.8952	4.69461	0.00051934	0.00865513	yes	up	0	0	0	0.0653284	0.0998955	0.179193	0	0.114806	PRPF39-201	pre-mRNA-processing factor 39 isoform X1 [Sus scrofa]	XP_001927155.1
Chr01_85074434_85082125		0.287747	-1.79713	0.0343582	0.209739	yes	down	0.0476275	0.0259219	0.0266706	0.0217761	0.0214062	0.059731	0.0334067	0.0343044	#N/A	#N/A	#N/A
Chr01_85074434_85130540		0.0397522	-4.65282	0.0106321	0.0956361	yes	down	0	0.012961	0.0133353	0	0	0	0.00876542	0	#N/A	#N/A	#N/A
Chr01_86268610_86270068	Pig.02846	0.0310987	-5.007	0.027919	0.183779	yes	down	0	0.0259219	0	0	0	0	0.00864064	0	UACA-209	uveal autoantigen with coiled-coil domains and ankyrin repeats isoform X4 [Sus scrofa]	XP_013848808.1
Chr01_87757404_87763045	Pig.02840	0.124097	-3.01046	0.00459597	0.0515473	yes	down	0.0884511	0.0324024	0.0466736	0.0217761	0.0285416	0.0223991	0.0558424	0.0242389	NOX5-201	NADPH oxidase 5 isoform X2 [Sus scrofa]	XP_020956203.1
Chr01_89458208_89475492	Pig.02825	39.133	5.29031	0.000412437	0.00725169	yes	up	0	0	0	0.181468	0.135572	0.201592	0	0.172877	CPB2-201	carboxypeptidase B2 [Sus scrofa]	XP_001929181.1
Chr01_89458208_89480626	Pig.02825	42.9385	5.4242	0.00285639	0.0357575	yes	up	0	0	0	0.22502	0.206926	0.141861	0	0.191269	CPB2-201	carboxypeptidase B2 [Sus scrofa]	XP_001929181.1
Chr01_89458208_89483212	Pig.02825	34.3165	5.10083	0.0228703	0.162424	yes	up	0	0	0	0.152433	0.164114	0.141861	0	0.152803	CPB2-201	carboxypeptidase B2 [Sus scrofa]	XP_001929181.1
Chr01_89463756_89483212	Pig.02825	30.4957	4.93054	0.0357114	0.212886	yes	up	0	0	0	0.181468	0.135572	0.0895965	0	0.135546	CPB2-201	carboxypeptidase B2 [Sus scrofa]	XP_001929181.1
Chr01_89715558_89717688	Pig.02822	0.270052	-1.88869	0.00621001	0.0634191	yes	down	0.108863	0.0453634	0.0866795	0.0725871	0.0784893	0.0746637	0.0803019	0.0752467	RUBCNL-201	protein RUBCNL-like isoform X1 [Sus scrofa]	XP_020921247.1
Chr01_95256133_95262693		2.34678	1.23068	6.27055e-05	0.00156275	yes	up	0.176902	0.12961	0.206697	1.40093	1.53411	1.34395	0.17107	1.42633	#N/A	#N/A	#N/A
Chr01_99667043_99684106	Pig.13147	14.8992	3.89716	0.0146205	0.119628	yes	up	0	0	0.0133353	0.145174	0.306822	0.216525	0.0044451	0.22284	PCSK6-201	proprotein convertase subtilisin/kexin type 6 isoform X4 [Sus scrofa]	XP_020954610.1
Chr01_99680098_99684106	Pig.13147	32.9248	5.0411	1.7843e-06	7.63315e-05	yes	up	0	0	0.020003	0.849269	0.763487	0.619709	0.00666766	0.744155	PCSK6-201	proprotein convertase subtilisin/kexin type 6 isoform X4 [Sus scrofa]	XP_020954610.1
Chr02_103734250_103780043	Pig.06137,MSTRG.5788	0.0142271	-6.13521	0.00250289	0.0318459	yes	down	0.0204118	0.0194414	0.0400059	0	0	0	0.0266197	0	#N/A	#N/A	#N/A
Chr02_10872284_10875081	Pig.14571	0.456659	-1.13081	0.00344631	0.0409711	yes	down	0.163294	0.142571	0.173359	0.28309	0.271145	0.238924	0.159741	0.264386	MATR3	PREDICTED: matrin-3-like isoform X1 [Lipotes vexillifer]	XP_013850634.1
Chr02_114580003_114665451	Pig.16704	0.042237	-4.56535	0.0498704	0.260275	yes	down	0	0.0194414	0	0	0	0	0.00648048	0	SOX6-201	transcription factor SOX-6 isoform X1 [Sus scrofa]	XP_020940976.1
Chr02_114811785_114838974	Pig.16704	0.0230785	-5.4373	0.0348659	0.210638	yes	down	0.0340197	0.012961	0	0	0	0	0.0156602	0	SOX6-201	transcription factor SOX-6 isoform X1 [Sus scrofa]	XP_020940976.1
Chr02_116803826_116807537	Pig.05908	9.00394	3.17056	0.0460458	0.247445	yes	up	0	0.012961	0	0.188727	0.121302	0.194126	0.00432032	0.168051	UEVLD-201	PREDICTED: tumor susceptibility gene 101 protein isoform X1 [Galeopterus variegatus]	AEV45769.1
Chr02_120685153_120715387	Pig.05931	59.9357	5.90534	1.63466e-05	0.00052278	yes	up	0	0	0	0.275831	0.342499	0.186659	0	0.26833	GAS2-201	growth arrest-specific protein 2 [Sus scrofa]	XP_020938899.1
Chr02_129529725_129544183	Pig.12557	0.286352	-1.80414	0.00462132	0.0516618	yes	down	0.0544315	0.0453634	0.0733442	0.0290349	0.0428123	0.104529	0.057713	0.0587921	QSER1-205	glutamine and serine-rich protein 1 [Sus scrofa]	XP_013849914.1
Chr02_129618137_129623462	Pig.12558	48.0893	5.58764	6.0881e-05	0.00153845	yes	up	0	0	0	0.239538	0.206926	0.194126	0	0.21353	DEPDC7-201	DEP domain-containing protein 7 [Sus scrofa]	XP_020938868.1
Chr02_130989369_130994154	Pig.12571	67.6205	6.07939	0.000814758	0.012868	yes	up	0	0	0	0.181468	0.513748	0.223991	0	0.306402	CAT-201	catalase [Sus scrofa]	NP_999466.2
Chr02_130989369_131012754	Pig.12571	61.4355	5.941	0.00165857	0.0233446	yes	up	0	0	0	0.0798458	0.63505	0.134395	0	0.283097	CAT-201	catalase [Sus scrofa]	NP_999466.2
Chr02_130990677_130992200	Pig.12571	61.6813	5.94676	0.000108562	0.00243726	yes	up	0	0	0	0.232279	0.406717	0.194126	0	0.277707	CAT-201	catalase [Sus scrofa]	NP_999466.2
Chr02_130990677_131007514	Pig.12571	5.30404	2.40709	4.13204e-07	2.20092e-05	yes	up	0.19051	0.0518438	0.20003	2.02518	3.91733	1.99352	0.147461	2.64534	CAT-201	catalase [Sus scrofa]	NP_999466.2
Chr02_130992790_130998896	Pig.12571	37.5172	5.22948	0.000990088	0.0150676	yes	up	0	0	0	0.0943633	0.321093	0.0970628	0	0.17084	CAT-201	catalase [Sus scrofa]	NP_999466.2
Chr02_130998705_131007514	Pig.12571	6.32858	2.66188	0.00556567	0.058944	yes	up	0.0136079	0	0.11335	0.885563	0.706404	0.858633	0.0423193	0.816866	CAT-201	catalase [Sus scrofa]	NP_999466.2
Chr02_130998705_131012754	Pig.12571	19.8134	4.3084	0.000462776	0.00795653	yes	up	0	0	0.020003	0.22502	0.599373	0.500247	0.00666766	0.441547	CAT-201	catalase [Sus scrofa]	NP_999466.2
Chr02_131004429_131012754	Pig.12571	16.4398	4.03912	0.00125859	0.018531	yes	up	0.0136079	0	0	0.254055	0.256874	0.253857	0.00453596	0.254929	CAT-201	catalase [Sus scrofa]	NP_999466.2
Chr02_131007384_131014572	Pig.12571	44.2029	5.46607	0.00102631	0.0154459	yes	up	0	0	0	0.181468	0.264009	0.149327	0	0.198268	CAT-201	catalase [Sus scrofa]	NP_999466.2
Chr02_13778027_13783009	Pig.14542	0.204127	-2.29246	0.00323725	0.0394349	yes	down	0.0340197	0.0583243	0.0266706	0.0217761	0.0356769	0.0373319	0.0396715	0.031595	SMAD1-201	SMAD5 [Homo sapiens]	ELR59268.1
Chr02_146743201_146743466	Pig.15343	0.0556287	-4.16803	0.013074	0.109786	yes	down	0.0136079	0.012961	0.0533413	0	0	0.0149327	0.0266367	0.00497758	SSRP1-201	PREDICTED: FACT complex subunit SSRP1 isoform X4 [Cebus capucinus imitator]	XP_003353912.1
Chr02_15163734_15169181	Pig.17377	7.26264	2.86049	0.01478	0.120389	yes	up	0	0	0.020003	0.174209	0.18552	0.126928	0.00666766	0.162219	SEC24A-201	protein transport protein Sec24A [Sus scrofa]	NP_001230853.1
Chr02_152254104_152319280		30.6557	4.93808	0.000302845	0.00569328	yes	up	0	0	0	0.108881	0.199791	0.104529	0	0.137734	#N/A	#N/A	#N/A
Chr02_152270778_152273957	Pig.19118	259.002	8.01682	1.99474e-10	2.70935e-08	yes	up	0	0	0	1.20495	1.25583	1.00049	0	1.15376	SLC22A9	solute carrier family 22 member 9-like isoform X1 [Sus scrofa]	XP_020938567.1
Chr02_155636386_155663230	Pig.20857	0.0779308	-3.68166	1.75495e-23	9.53462e-20	yes	down	0.83008	0.440673	0.506742	0.145174	0.235468	0.119462	0.592498	0.166701	Gstp1	glutathione S-transferase P-like isoform X1 [Sus scrofa]	XP_020938401.1
Chr02_156944449_156984195		0.218164	-2.19651	0.00559976	0.0591897	yes	down	0.0544315	0.110168	0.0733442	0.0580697	0.0499477	0.0970628	0.0793146	0.0683601	#N/A	#N/A	#N/A
Chr02_158020903_158028723	Pig.17120	45.2122	5.49864	7.38999e-05	0.00178444	yes	up	0	0	0	0.210503	0.214062	0.179193	0	0.201252	ANO1-204	anoctamin-1 isoform X1 [Sus scrofa]	XP_020938329.1
Chr02_158152493_158154207	Pig.17122	0.36054	-1.47177	0.0346835	0.210638	yes	down	0.0680393	0.0388829	0.153356	0.108881	0.0856247	0.119462	0.0867594	0.104656	PPFIA1-201	liprin-alpha-1 isoform X8 [Sus scrofa]	XP_020938327.1
Chr02_159713586_159713781		0.0258475	-5.27383	0.0017647	0.0246021	yes	down	0.0476275	0	0	0	0	0	0.0158758	0	#N/A	#N/A	#N/A
Chr02_159713586_159713945		0.0388997	-4.6841	0.0279406	0.183779	yes	down	0	0.012961	0.0133353	0	0	0	0.00876542	0	#N/A	#N/A	#N/A
Chr02_165538728_165544023	Pig.14625	0.1144	-3.12784	0.000532065	0.00879998	yes	down	0.0272157	0.0259219	0.0733442	0	0.0356769	0.0149327	0.0421606	0.0168699	NUP214-202	nuclear pore complex protein Nup214 isoform X1 [Sus scrofa]	XP_005660586.1
Chr02_173067586_173070615	Pig.10188	15.2921	3.93472	0.039402	0.22822	yes	up	0	0	0	0.0871046	0.0642185	0.0522646	0	0.0678626	STRBP-201	spermatid perinuclear RNA-binding protein isoform X1 [Sus scrofa]	XP_020930262.1
Chr02_22409998_22415126	Pig.12386	6.78223	2.76176	1.5107e-08	1.18951e-06	yes	up	0.0272157	0.012961	0.0800119	0.769424	1.20588	0.828767	0.0400629	0.934691	ALDH7A1-205	alpha-aminoadipic semialdehyde dehydrogenase [Sus scrofa]	XP_013850523.2
Chr02_28878006_28896777	Pig.07284,MSTRG.3982	13.9933	3.80667	0.0242978	0.168166	yes	up	0	0	0	0.0943633	0.0784893	0.0149327	0	0.0625951	#N/A	#N/A	#N/A
Chr02_33534085_33534503	Pig.05649	31.7536	4.98885	2.65622e-06	0.000106112	yes	up	0	0.0194414	0	0.805717	0.991819	0.701839	0.00648048	0.833125	KCNN2-201	small conductance calcium-activated potassium channel protein 2 isoform X2 [Sus scrofa]	XP_020940295.1
Chr02_37605171_37608291	Pig.05628	22.0354	4.46175	0.0372814	0.219447	yes	up	0	0	0	0.101622	0.0784893	0.111996	0	0.097369	MAN2A1-205	alpha-mannosidase 2 [Sus scrofa]	XP_003123871.4
Chr02_37935438_37968636		0.355717	-1.4912	0.006	0.062078	yes	down	0.108863	0.0777657	0.126685	0.152433	0.0998955	0.141861	0.104438	0.131397	#N/A	#N/A	#N/A
Chr02_49759974_49766895		20.9937	4.39188	0.00024545	0.00477968	yes	up	0.0136079	0	0	0.290349	0.378176	0.313588	0.00453596	0.327371	#N/A	#N/A	#N/A
Chr02_49827103_49831221	Pig.08484	2.40267	1.26464	4.49707e-05	0.00119183	yes	up	0.278961	0.123129	0.20003	1.42997	1.82666	1.81433	0.200707	1.69032	ELL2-201	RNA polymerase II elongation factor ELL2 [Sus scrofa]	XP_003123844.2
Chr02_51442713_51444681	Pig.08473	46.4573	5.53783	0.0255456	0.174578	yes	up	0	0	0	0.261314	0.192656	0.16426	0	0.206076	KIAA0825	uncharacterized protein KIAA0825 homolog isoform X1 [Sus scrofa]	XP_020941036.1
Chr02_51562242_51636286		14.9968	3.90658	0.0332777	0.206155	yes	up	0	0	0	0.0362936	0.107031	0.059731	0	0.0676851	#N/A	#N/A	#N/A
Chr02_56247505_56259953	Pig.02459	0.112991	-3.14571	0.000305758	0.00572822	yes	down	0.0612354	0.012961	0.0400059	0	0.0142708	0.0298655	0.0380674	0.0147121	MEF2C-204	PREDICTED: myocyte-specific enhancer factor 2C isoform X2 [Sorex araneus]	XP_020937758.1
Chr02_56247708_56259953		0.0498792	-4.32542	0.00814075	0.0782809	yes	down	0	0.0194414	0	0	0	0	0.00648048	0	#N/A	#N/A	#N/A
Chr02_60658293_60663530	Pig.02468	0.0230443	-5.43944	0.000145964	0.00313447	yes	down	0.142883	0.0777657	0.120018	0	0.0285416	0	0.113555	0.00951385	VCAN-201	versican core protein isoform X1 [Sus scrofa]	XP_020936732.1
Chr02_62738240_62751334	Pig.02479	0.01311	-6.25319	0.0493593	1	yes	down	0.0204118	0.012961	0.0600089	0	0	0	0.0311272	0	RASGRF2-201	ras-specific guanine nucleotide-releasing factor 2 isoform X2 [Sus scrofa]	XP_020940159.1
Chr02_64288819_64298085	MSTRG.4458,MSTRG.4459,Pig.02491	15.0957	3.91606	3.41992e-05	0.000943168	yes	up	0	0.0194414	0	0.362936	0.335363	0.418117	0.00648048	0.372139	#N/A	#N/A	#N/A
Chr02_64288819_64310703	MSTRG.4458,MSTRG.4459,Pig.02491	153.745	7.26439	2.65099e-09	2.53258e-07	yes	up	0	0	0	0.624249	0.734945	0.694373	0	0.684522	#N/A	#N/A	#N/A
Chr02_64347276_64350833	MSTRG.4458,MSTRG.4459,Pig.02491	28.1985	4.81755	0.00117859	0.0174476	yes	up	0	0	0	0.152433	0.142708	0.0821301	0	0.125757	#N/A	#N/A	#N/A
Chr02_64569831_64579384	MSTRG.4463,Pig.02493	48.0219	5.58562	0.00110454	0.0164409	yes	up	0	0	0	0.181468	0.285416	0.179193	0	0.215359	#N/A	#N/A	#N/A
Chr02_64570850_64579384	MSTRG.4463,Pig.02493	22.3217	4.48037	0.0487488	0.256143	yes	up	0	0	0	0.0435523	0.178385	0.0821301	0	0.101356	#N/A	#N/A	#N/A
Chr02_64635810_64674168	Pig.02495	35.0683	5.1321	0.000834859	0.0131425	yes	up	0	0	0	0.116139	0.214062	0.141861	0	0.157354	DMGDH-201	dimethylglycine dehydrogenase, mitochondrial isoform X1 [Sus scrofa]	XP_020940139.1
Chr02_66900739_66904174	Pig.02512	42.7311	5.41722	0.0146771	0.119731	yes	up	0	0	0	0.130657	0.249739	0.194126	0	0.191507	IQGAP2-201	LOW QUALITY PROTEIN: ras GTPase-activating-like protein IQGAP2 [Sus scrofa]	XP_020940121.1
Chr02_66979806_66991420	Pig.02512	48.8539	5.6104	1.31642e-06	6.1129e-05	yes	up	0	0	0.0133353	0.558921	0.927601	0.776503	0.0044451	0.754341	IQGAP2-201	LOW QUALITY PROTEIN: ras GTPase-activating-like protein IQGAP2 [Sus scrofa]	XP_020940121.1
Chr02_66979806_66998212	Pig.02512	61.3012	5.93784	1.73697e-05	0.000542355	yes	up	0	0	0	0.261314	0.264009	0.291189	0	0.272171	IQGAP2-201	LOW QUALITY PROTEIN: ras GTPase-activating-like protein IQGAP2 [Sus scrofa]	XP_020940121.1
Chr02_70913021_70914547	Pig.02543	0.350246	-1.51356	0.013367	0.111385	yes	down	0.0748433	0.0518438	0.133353	0.101622	0.0856247	0.126928	0.0866801	0.104725	SIMC1-201	SUMO-interacting motif-containing protein 1 isoform X1 [Sus scrofa]	XP_005661533.1
Chr02_71469610_71472456	Pig.02558	0.012047	-6.37518	0.0219824	0.157977	yes	down	0.0272157	0.0324024	0.0266706	0	0	0	0.0287629	0	UIMC1-201	BRCA1-A complex subunit RAP80 [Sus scrofa]	XP_020931999.1
Chr02_76845237_76846956		26.1329	4.7078	0.00111648	0.0165733	yes	up	0	0	0	0.108881	0.128437	0.111996	0	0.116438	#N/A	#N/A	#N/A
Chr02_80315127_80316205	Pig.12229	15.2915	3.93465	0.0207522	0.152094	yes	up	0	0	0	0.0871046	0.0642185	0.0522646	0	0.0678626	C3-201	complement C3 precursor [Sus scrofa]	XP_020936478.1
Chr02_82922894_82923383	Pig.19543	2.28051	1.18935	0.0160802	0.128099	yes	up	0.129275	0.0777657	0.0933472	0.537145	0.906194	1.01543	0.100129	0.819589	LDLR-201	low-density lipoprotein receptor precursor [Sus scrofa]	NP_001193283.1
Chr02_82934874_82936323	Pig.19543	3.63597	1.86234	0.047859	0.254349	yes	up	0.0476275	0.0194414	0	0.239538	0.342499	0.313588	0.0223563	0.298541	LDLR-201	low-density lipoprotein receptor precursor [Sus scrofa]	NP_001193283.1
Chr02_83909541_83910328	Pig.16212	82.0169	6.35785	2.44429e-06	9.83692e-05	yes	up	0	0	0	0.254055	0.385311	0.455449	0	0.364938	LOC101123861	complement C3 [Sus scrofa]	XP_005654909.1
Chr02_84420990_84443541	Pig.16229	38.5363	5.26815	0.000503729	0.00844679	yes	up	0	0	0	0.101622	0.156979	0.253857	0	0.170819	Pm20d1	N-fatty-acyl-amino acid synthase/hydrolase PM20D1 isoform X1 [Sus scrofa]	XP_005654890.3
Chr02_84431365_84436596	Pig.16229	20.0012	4.32202	0.0280205	0.183949	yes	up	0	0	0	0.0798458	0.114166	0.0746637	0	0.0895586	Pm20d1	N-fatty-acyl-amino acid synthase/hydrolase PM20D1 isoform X1 [Sus scrofa]	XP_005654890.3
Chr02_84439685_84443541	Pig.16229	110.247	6.78459	6.62279e-07	3.33163e-05	yes	up	0	0	0	0.391971	0.528019	0.552512	0	0.490834	Pm20d1	N-fatty-acyl-amino acid synthase/hydrolase PM20D1 isoform X1 [Sus scrofa]	XP_005654890.3
Chr02_86657799_86658193	Pig.16322	9.32979	3.22185	0.0456574	0.246728	yes	up	0	0	0	0.0435523	0.0356769	0.0447982	0	0.0413425	GET3-201	PREDICTED: ATPase ASNA1 [Cebus capucinus imitator]	NP_004308.2
Chr02_92734565_92744854	MSTRG.5482	0.412763	-1.27662	0.0234718	0.165185	yes	down	0.0952551	0.0648048	0.140021	0.0871046	0.199791	0.149327	0.100027	0.145408	0	0	XP_020935332.1
Chr02_92989110_93068632	Pig.06424	6.9531e+06	22.7292	8.41194e-05	0.00197734	yes	up	0	0	0	2.43167	0	3.30014	0	1.9106	CYP4F8-201	cytochrome P450, family 4, subfamily F, polypeptide 55 isoform X3 [Sus scrofa]	XP_020935397.1
Chr02_93039238_93079314	Pig.06424	0.297761	-1.74777	0.0241644	0.167455	yes	down	0.544315	0.997994	1.02015	0.827493	1.01323	1.12742	0.854153	0.98938	CYP4F8-201	cytochrome P450, family 4, subfamily F, polypeptide 55 isoform X3 [Sus scrofa]	XP_020935397.1
Chr02_96355547_96355955	MSTRG.5708,Pig.06310	27.1009	4.76027	0.0481712	0.254803	yes	up	0	0	0	0.0943633	0.149843	0.119462	0	0.121223	#N/A	#N/A	#N/A
Chr03_105294932_105332185	Pig.16535	5.28905	2.40301	0.0171097	0.133751	yes	up	0.0204118	0	0.0266706	0.217761	0.27828	0.313588	0.0156941	0.269876	CLEC16A-201	protein CLEC16A isoform X1 [Sus scrofa]	XP_020942272.1
Chr03_106100779_106116835	Pig.17772	0.188542	-2.40704	0.0107154	0.0960673	yes	down	0.0340197	0.0648048	0.0466736	0.0580697	0.0499477	0	0.0484994	0.0360058	GSPT1-202	eukaryotic peptide chain release factor GTP-binding subunit ERF3A isoform X1 [Sus scrofa]	XP_020942248.1
Chr03_108726174_108764668	Pig.18781	18.7964	4.23238	0.0168999	0.132876	yes	up	0	0	0	0.0653284	0.0642185	0.119462	0	0.083003	PARN-202	poly(A)-specific ribonuclease PARN isoform X1 [Sus scrofa]	XP_020942220.1(poly
Chr03_108839582_108909181		0.00419003	-7.89882	0.000209276	0.00418276	yes	down	0.0884511	0.0777657	0.0933472	0	0	0	0.0865214	0	#N/A	#N/A	#N/A
Chr03_109907028_109909284	MSTRG.9767	189.471	7.56584	4.47534e-09	3.98599e-07	yes	up	0	0	0	0.73313	0.941871	0.858633	0	0.844545	0	0	XP_020942219.1
Chr03_111561487_111577057	Pig.11639	0.183402	-2.44692	0.000362197	0.00647309	yes	down	0.15649	0.0518438	0.120018	0.0798458	0.128437	0	0.109451	0.0694276	SMG1-201	serine/threonine-protein kinase SMG1 isoform X1 [Sus scrofa]	XP_020942206.1
Chr03_111581452_111583858	Pig.11639	2.21499	1.1473	0.0183425	0.138997	yes	up	0.0884511	0	0.0600089	0.348418	0.363905	0.380785	0.0494867	0.364369	SMG1-201	serine/threonine-protein kinase SMG1 isoform X1 [Sus scrofa]	XP_020942206.1
Chr03_118967715_118988965	Pig.17929	2.45984	1.29856	0.00127111	0.0186647	yes	up	0.0680393	0.0388829	0.0666766	0.486334	0.513748	0.500247	0.0578663	0.50011	FAM120A-203	constitutive coactivator of PPAR-gamma-like protein 1 isoform X1 [Sus scrofa]	XP_020943836.1
Chr03_118983837_118988965	Pig.17929	3.34306	1.74117	3.08465e-05	0.00087286	yes	up	0.0340197	0.0583243	0.0733442	0.522627	0.756351	0.724238	0.0552294	0.667739	FAM120A-203	constitutive coactivator of PPAR-gamma-like protein 1 isoform X1 [Sus scrofa]	XP_020943836.1
Chr03_121945221_121948271		25.4078	4.6672	0.0363565	0.215712	yes	up	0	0	0	0.108881	0.142708	0.0895965	0	0.113728	#N/A	#N/A	#N/A
Chr03_123046084_123053024		0.00818199	-6.93333	0.00033277	0.00604993	yes	down	0.0680393	0.0194414	0.0600089	0	0	0	0.0491632	0	#N/A	#N/A	#N/A
Chr03_126443630_126447071	Pig.21034	0.127281	-2.97391	0.019011	0.142268	yes	down	0.102059	0.0194414	0.0466736	0.0362936	0.0356769	0	0.056058	0.0239902	FBRS-201	probable fibrosin-1 [Sus scrofa]	XP_020942074.1
Chr03_126444700_126447071	Pig.21034	0.234231	-2.09399	4.93955e-06	0.000187668	yes	down	0.299373	0.259219	0.453401	0.232279	0.214062	0.395718	0.337331	0.280686	FBRS-201	probable fibrosin-1 [Sus scrofa]	XP_020942074.1
Chr03_133535537_133536497	Pig.09038,MSTRG.10344	0.30251	-1.72495	0.0003738	0.00665855	yes	down	0.170098	0.0648048	0.11335	0.0943633	0.107031	0.16426	0.116084	0.121885	#N/A	#N/A	#N/A
Chr03_17975082_17975842		0.0222503	-5.49003	0.00527664	0.056433	yes	down	0.0884511	0.0712853	0.126685	0	0	0.0223991	0.095474	0.00746637	#N/A	#N/A	#N/A
Chr03_18777200_18778722	Pig.09335	0.0153222	-6.02823	0.000976855	0.014908	yes	down	0.0204118	0.0194414	0.0333383	0	0	0	0.0243972	0	ITSN2-201	intersectin-2 isoform X1 [Sus scrofa]	XP_020944009.1
Chr03_19945644_19949910	Pig.20029	3.1624	1.66102	0.013604	0.112515	yes	up	0.0816472	0.0324024	0.0266706	0.551662	0.63505	0.403184	0.0469067	0.529965	DTNB	dystrobrevin beta isoform X1 [Sus scrofa]	XP_020943401.1
Chr03_26054544_26067271	Pig.06706	21.1716	4.40406	0.0114709	0.100905	yes	up	0	0	0	0.0943633	0.0499477	0.134395	0	0.0929019	BIRC6-201	LOW QUALITY PROTEIN: baculoviral IAP repeat-containing protein 6 [Sus scrofa]	XP_020943315.1
Chr03_26118523_26119127	Pig.06706	27.4184	4.77707	0.00149494	0.0214301	yes	up	0	0	0	0.137916	0.107031	0.119462	0	0.121469	BIRC6-201	LOW QUALITY PROTEIN: baculoviral IAP repeat-containing protein 6 [Sus scrofa]	XP_020943315.1
Chr03_30444359_30445305	MSTRG.8087	0.337643	-1.56643	0.000836978	0.0131425	yes	down	0.340197	0.194414	0.266706	0.319383	0.356769	0.291189	0.267106	0.322447	0	0	XP_003125283.3
Chr03_31031804_31049311	Pig.06727	45.9984	5.52351	2.77782e-05	0.000798514	yes	up	0	0	0	0.232279	0.18552	0.194126	0	0.203975	RMDN2-201	regulator of microtubule dynamics protein 2 isoform X1 [Sus scrofa]	XP_013851658.1
Chr03_31503204_31528334	Pig.06731	0.0147272	-6.08538	0.00177055	0.0246021	yes	down	0.0340197	0.012961	0.0333383	0	0	0	0.026773	0	HNRNPLL-208	PREDICTED: heterogeneous nuclear ribonucleoprotein L-like isoform X1 [Bos mutus]	XP_020943266.1
Chr03_42179563_42179757	MSTRG.8216	0.0101505	-6.62231	0.0157367	0.126103	yes	down	0.0204118	0.0518438	0.020003	0	0	0	0.0307529	0	0	0	XP_020943877.1
Chr03_45601718_45637098	MSTRG.8253,Pig.04789,MSTRG.8254	4.04925	2.01765	8.48472e-12	1.8439e-09	yes	up	0.38102	0.142571	0.180027	3.36078	3.48921	3.15081	0.234539	3.3336	#N/A	#N/A	#N/A
Chr03_49976617_49982074	Pig.04812	0.325713	-1.61833	0.0107976	0.0963276	yes	down	0.102059	0.0518438	0.0733442	0.0871046	0.0927601	0.0821301	0.075749	0.0873316	EHBP1-204	EH domain-binding protein 1 isoform X1 [Sus scrofa]	XP_020943128.1
Chr03_49988991_50034685	Pig.04812	0.167326	-2.57927	0.00507123	0.0552144	yes	down	0.0680393	0.0194414	0.11335	0.0217761	0.0356769	0.0522646	0.0669436	0.0365726	EHBP1-204	EH domain-binding protein 1 isoform X1 [Sus scrofa]	XP_020943128.1
Chr03_50015679_50034685	Pig.04812	0.220078	-2.18391	0.00080778	0.012795	yes	down	0.183706	0.0518438	0.266706	0.123398	0.149843	0.0895965	0.167419	0.120946	EHBP1-204	EH domain-binding protein 1 isoform X1 [Sus scrofa]	XP_020943128.1
Chr03_50973589_50974664	MSTRG.8330,Pig.04818	5.61735	2.48989	4.56722e-07	2.38594e-05	yes	up	0.0340197	0.0453634	0.0400059	0.90008	0.806299	0.731705	0.0397963	0.812695	#N/A	#N/A	#N/A
Chr03_5673086_5684674	Pig.15960	3.29437	1.72	0.0205051	0.150954	yes	up	0.0340197	0	0.020003	0.16695	0.214062	0.216525	0.0180075	0.199179	PPM1A-201	LOW QUALITY PROTEIN: protein phosphatase 1B [Sus scrofa]	XP_015997703.1
Chr03_71892828_71908759	Pig.13433	2.0493	1.03513	0.0337559	0.207932	yes	up	0.0408236	0.0324024	0.0733442	0.254055	0.413853	0.388251	0.0488567	0.352053	UXS1-201	UDP-glucuronic acid decarboxylase 1 isoform b [Sus scrofa]	NP_001231703.1
Chr03_74294744_74298578		0.0327659	-4.93166	0.0126402	0.106803	yes	down	0	0	0.0400059	0	0	0	0.0133353	0	#N/A	#N/A	#N/A
Chr03_76209366_76216392	Pig.09468,MSTRG.8682	3.00233	1.58608	0.0478796	0.254349	yes	up	0.0272157	0	0.0333383	0.217761	0.18552	0.194126	0.0201847	0.199136	#N/A	#N/A	#N/A
Chr03_76247636_76248435	Pig.09468,MSTRG.8682	3.6717	1.87645	0.00247637	0.0315824	yes	up	0.0612354	0.0259219	0.0133353	0.50811	0.37104	0.43305	0.0334975	0.4374	#N/A	#N/A	#N/A
Chr03_79003261_79025856	Pig.09438	43.8002	5.45286	0.00200095	0.0271899	yes	up	0	0	0	0.137916	0.256874	0.194126	0	0.196305	VWA3B-202	von Willebrand factor A domain-containing protein 3B isoform X1 [Sus scrofa]	XP_020942889.1
Chr03_89657255_89671619	MSTRG.9044,Pig.09102	147.054	7.20021	1.16026e-07	7.0828e-06	yes	up	0	0	0	0.413747	0.877653	0.686906	0	0.659435	#N/A	#N/A	#N/A
Chr03_89660066_89668045	MSTRG.9044,Pig.09102	39.1556	5.29115	0.0297095	0.190824	yes	up	0	0	0	0.116139	0.264009	0.149327	0	0.176492	#N/A	#N/A	#N/A
Chr03_89660066_89671619	MSTRG.9044,Pig.09102	45.0798	5.49441	0.0238567	0.166332	yes	up	0	0	0	0.203244	0.228332	0.171727	0	0.201101	#N/A	#N/A	#N/A
Chr03_89663115_89671619	MSTRG.9044,Pig.09102	63.2226	5.98237	1.66453e-05	0.000528852	yes	up	0	0	0	0.195985	0.378176	0.276256	0	0.283472	#N/A	#N/A	#N/A
Chr03_89667585_89671619	MSTRG.9044,Pig.09102	346.596	8.43711	4.08256e-11	7.64846e-09	yes	up	0	0	0	1.24124	1.99791	1.41861	0	1.55259	#N/A	#N/A	#N/A
Chr03_89677790_89686941	MSTRG.9044,Pig.09102	51.1873	5.67771	0.000316415	0.00586718	yes	up	0	0	0	0.130657	0.385311	0.179193	0	0.23172	#N/A	#N/A	#N/A
Chr03_89683944_89733650	MSTRG.9044	9.59093e+08	29.8371	5.29885e-08	3.56926e-06	yes	up	0	0	0	1.72032	2.16202	1.43354	0	1.77196	0	0	AKO62660.1
Chr03_89787538_89792287	Pig.09104	160.138	7.32318	7.78313e-08	4.97479e-06	yes	up	0	0	0	0.457299	0.827705	0.858633	0	0.714546	CYP3A29-207	cytochrome P450 CYP3A [Sus scrofa]	ACG76385.1
Chr03_89817260_89879377	Pig.09104	2.3624e-09	-28.6571	1.42597e-05	0.000466704	yes	down	0	0	0.0133353	0	0	0	0.0044451	0	CYP3A29-207	cytochrome P450 CYP3A [Sus scrofa]	ACG76385.1
Chr03_89873248_89879377	Pig.09104	208.553	7.70427	2.05228e-09	2.06482e-07	yes	up	0	0	0	0.602473	1.19875	1.00049	0	0.933904	CYP3A29-207	cytochrome P450 CYP3A [Sus scrofa]	ACG76385.1
Chr03_91344235_91344900	MSTRG.9117,Pig.09148	0.0186957	-5.74115	0.0318363	0.199961	yes	down	0	0	0.0733442	0	0	0	0.0244481	0	#N/A	#N/A	#N/A
Chr03_98810789_98847046	Pig.10357	6.55606	2.71283	7.31233e-05	0.00177357	yes	up	0	0.0194414	0.0400059	0.391971	0.535154	0.470381	0.0198158	0.465835	CREBBP-201	CREB-binding protein [Sus scrofa]	XP_005662241.2
Chr03_98846333_98847046	Pig.10357	5.82581	2.54246	7.51013e-05	0.00179747	yes	up	0.0612354	0.0388829	0	0.660543	0.799164	0.724238	0.0333728	0.727982	CREBBP-201	CREB-binding protein [Sus scrofa]	XP_005662241.2
Chr03_99679096_99685486	MSTRG.9631,Pig.10377	11.8963	3.57244	0.0309571	0.196858	yes	up	0	0	0	0.0653284	0.0642185	0.0298655	0	0.0531375	#N/A	#N/A	#N/A
Chr04_105969655_105988484	Pig.01686,MSTRG.12330	0.073701	-3.76217	0.0432312	0.239913	yes	down	0	0.012961	0	0	0	0	0.00432032	0	#N/A	#N/A	#N/A
Chr04_110101379_110134080	Pig.01698	173.154	7.43591	2.65704e-09	2.53258e-07	yes	up	0	0	0	0.754906	0.899059	0.664507	0	0.772824	TLCD4-RWDD3	transmembrane protein 56 isoform X2 [Sus scrofa]	XP_020945824.1
Chr04_110124557_110134080	Pig.01698	64.1726	6.00389	7.43941e-06	0.000273097	yes	up	0	0	0	0.304866	0.313957	0.238924	0	0.285916	TLCD4-RWDD3	transmembrane protein 56 isoform X2 [Sus scrofa]	XP_020945824.1
Chr04_110234028_110234332	Pig.01699	4.08038	2.0287	0.0409469	0.233927	yes	up	0.0544315	0.0324024	0.0866795	0.355677	1.24156	0.866099	0.0578378	0.821111	ALG14-202	UDP-N-acetylglucosamine transferase subunit ALG14 homolog isoform X3 [Sus scrofa]	XP_001924741.1
Chr04_112444369_112478901	Pig.01720	5.60896	2.48773	0.00640648	0.0651805	yes	up	0.0272157	0.0194414	0.020003	0.421005	0.37104	0.552512	0.02222	0.448186	EVI5-208	ecotropic viral integration site 5 protein homolog isoform X4 [Sus scrofa]	XP_020945870.1
Chr04_113748733_113752559	Pig.01735	0.257312	-1.95841	0.00704197	0.0705886	yes	down	0.0408236	0.0453634	0.0533413	0.0435523	0.0428123	0.0447982	0.0465094	0.043721	ZNF644-207	zinc finger protein 644 isoform X1 [Sus scrofa]	XP_020945920.1
Chr04_117045483_117065883	MSTRG.12519,Pig.01753	19.0317	4.25034	0.0078617	0.0767717	yes	up	0	0	0	0.050811	0.164114	0.0447982	0	0.0865744	#N/A	#N/A	#N/A
Chr04_117301750_117319079	Pig.01755	0.395093	-1.33974	0.0391126	0.227272	yes	down	0.0884511	0.0453634	0.100015	0.0580697	0.121302	0.141861	0.0779431	0.107077	SH3GLB1-201	endophilin-B1 isoform X1 [Sus scrofa]	XP_005663778.1
Chr04_118513508_118521288	Pig.01763	22.6571	4.50189	0.0110143	0.0979392	yes	up	0	0	0	0.0798458	0.0784893	0.141861	0	0.100065	DDAH1-201	N(G),N(G)-dimethylarginine dimethylaminohydrolase 1 isoform X1 [Sus scrofa]	XP_020946001.1(N(G),N
Chr04_118647528_118648214	Pig.01766	69.7578	6.12428	1.38793e-05	0.000459796	yes	up	0	0	0	0.34116	0.264009	0.321054	0	0.308741	SYDE2-201	LOW QUALITY PROTEIN: rho GTPase-activating protein SYDE2 [Sus scrofa]	XP_001928259.4
Chr04_13085270_13092315	Pig.03742	4.16227	2.05737	0.00240257	0.0307945	yes	up	0.0408236	0.0194414	0.0333383	0.384712	0.520883	0.462915	0.0312011	0.45617	ENPP2-201	ectonucleotide pyrophosphatase/phosphodiesterase family member 2 isoform X1 [Sus scrofa]	XP_013851977.1
Chr04_22743270_22752539	Pig.03771	5.46171	2.44935	0.00359418	0.0421754	yes	up	0.0136079	0	0.0133353	0.123398	0.235468	0.149327	0.00898106	0.169398	EMC2-201	ER membrane protein complex subunit 2 isoform X4 [Sus scrofa]	XP_020944677.1
Chr04_22763380_22773855	Pig.03771	4.10375	2.03694	2.76762e-05	0.000798514	yes	up	0.0816472	0.0453634	0.100015	1.19043	1.17734	0.881032	0.0756751	1.08293	EMC2-201	ER membrane protein complex subunit 2 isoform X4 [Sus scrofa]	XP_020944677.1
Chr04_24119381_24174339	Pig.08071	0.0132825	-6.23433	0.0216588	0.156292	yes	down	0.0748433	0.012961	0	0	0	0	0.0292681	0	RGS22-202	regulator of G-protein signaling 22 isoform X2 [Sus scrofa]	XP_020944711.1
Chr04_24850635_24868965	MSTRG.10730	0.0179363	-5.80098	0.0299764	0.191828	yes	down	0.0204118	0.0194414	0.020003	0	0	0	0.0199521	0	0	0	TKC47859.1
Chr04_26383601_26385684	Pig.08086	0.407545	-1.29497	0.0472561	0.251708	yes	down	0.0748433	0.0583243	0.0400059	0.050811	0.107031	0.104529	0.0577245	0.087457	UBR5-201	E3 ubiquitin-protein ligase UBR5 isoform X2 [Sus scrofa]	XP_020944690.1
Chr04_28268052_28272728	MSTRG.10816,Pig.08101	272.824	8.09183	2.61267e-10	3.37967e-08	yes	up	0	0	0	0.863787	1.74103	1.07516	0	1.22666	#N/A	#N/A	#N/A
Chr04_29129287_29153365	Pig.08103	0.482868	-1.0503	0.0231815	0.163565	yes	down	0.176902	0.0972072	0.166691	0.28309	0.192656	0.268789	0.146934	0.248178	ZFPM2-204	zinc finger protein ZFPM2 [Sus scrofa]	NP_001182303.1
Chr04_30299278_30342356	Pig.08107	0.00538333	-7.53729	8.51632e-08	5.38014e-06	yes	down	0.0476275	0.0712853	0.0800119	0	0	0	0.0663082	0	OXR1-205	oxidation resistance protein 1 isoform X4 [Sus scrofa]	XP_013852007.1
Chr04_36790993_36805402	Pig.01495	15.0413	3.91086	0.0186285	0.140372	yes	up	0	0	0	0.0798458	0.0927601	0.0298655	0	0.0674905	WWP1-201	NEDD4-like E3 ubiquitin-protein ligase WWP1 isoform X1 [Sus scrofa]	XP_005663042.1
Chr04_36801646_36805402	Pig.01495	19.6685	4.29782	0.00292102	0.0363989	yes	up	0	0	0	0.0943633	0.0856247	0.0821301	0	0.0873727	WWP1-201	NEDD4-like E3 ubiquitin-protein ligase WWP1 isoform X1 [Sus scrofa]	XP_005663042.1
Chr04_36807602_36836417	Pig.01495	7.71499	2.94766	0.0452123	0.24613	yes	up	0	0	0.020003	0.152433	0.206926	0.141861	0.00666766	0.167073	WWP1-201	NEDD4-like E3 ubiquitin-protein ligase WWP1 isoform X1 [Sus scrofa]	XP_005663042.1
Chr04_36821977_36836417	Pig.01495	11.687	3.54683	2.07485e-06	8.5399e-05	yes	up	0.0408236	0	0.0133353	0.558921	0.977548	0.604776	0.018053	0.713748	WWP1-201	NEDD4-like E3 ubiquitin-protein ligase WWP1 isoform X1 [Sus scrofa]	XP_005663042.1
Chr04_36821977_36851349	Pig.01495	20.1431	4.33221	0.0192398	0.14371	yes	up	0	0	0	0.0798458	0.0998955	0.0895965	0	0.0897793	WWP1-201	NEDD4-like E3 ubiquitin-protein ligase WWP1 isoform X1 [Sus scrofa]	XP_005663042.1
Chr04_36836233_36840228	Pig.01495	7.44476	2.89622	0.0313127	0.198055	yes	up	0	0.012961	0	0.101622	0.142708	0.149327	0.00432032	0.131219	WWP1-201	NEDD4-like E3 ubiquitin-protein ligase WWP1 isoform X1 [Sus scrofa]	XP_005663042.1
Chr04_36861805_36875034		59.7361	5.90053	4.41368e-05	0.00118126	yes	up	0	0	0	0.28309	0.242603	0.268789	0	0.264827	#N/A	#N/A	#N/A
Chr04_42637595_42638483	Pig.01470	0.13618	-2.87641	4.47139e-05	0.00119084	yes	down	0.149687	0.0972072	0.0533413	0.0362936	0.0570831	0.059731	0.100078	0.0510359	ZBTB10-201	zinc finger and BTB domain-containing protein 10 isoform X1 [Sus scrofa]	XP_001928312.1
Chr04_48625429_48666494		4.31081	2.10796	7.92323e-07	3.84347e-05	yes	up	0.0544315	0.012961	0.100015	0.834752	0.763487	0.8437	0.0558024	0.81398	#N/A	#N/A	#N/A
Chr04_48646096_48666494	Pig.01448	38.3811	5.26232	0.000260111	0.00502913	yes	up	0	0	0	0.195985	0.149843	0.16426	0	0.17003	STAU2-203	double-stranded RNA-binding protein Staufen homolog 2 isoform X7 [Sus scrofa]	XP_020944868.1
Chr04_51710217_51714419	Pig.01430	9.63023	3.26757	0.0033586	0.0404596	yes	up	0	0	0.020003	0.137916	0.299686	0.216525	0.00666766	0.218042	NCOA2-204	nuclear receptor coactivator 2 [Sus scrofa]	NP_001107747.1
Chr04_53072128_53101968	Pig.01425	20.9683	4.39014	0.0457257	0.246728	yes	up	0	0	0	0.0362936	0.0856247	0.156794	0	0.092904	C8orf34-201	LOW QUALITY PROTEIN: uncharacterized protein C8orf34 homolog [Sus scrofa]	XP_020946465.1
Chr04_53317379_53341719	Pig.01424	0.111727	-3.16195	0.0305546	0.194611	yes	down	0.0340197	0.0388829	0.0533413	0.050811	0	0	0.0420813	0.016937	PREX2-201	phosphatidylinositol 3,4,5-trisphosphate-dependent Rac exchanger 2 protein isoform X1 [Sus scrofa]	XP_020944928.1
Chr04_54218624_54228068	Pig.01421	0.424874	-1.23489	1.13672e-05	0.00038359	yes	down	0.755237	0.738775	1.66691	1.51707	1.67682	1.53061	1.05364	1.57483	CSPP1-208	centrosome and spindle pole-associated protein 1 isoform X1 [Sus scrofa]	XP_013852149.1
Chr04_55472441_55495387		3.25835	1.70414	0.00525714	0.0563354	yes	up	0.0680393	0.0259219	0.0333383	0.457299	0.63505	0.373319	0.0424332	0.488556	#N/A	#N/A	#N/A
Chr04_58498565_58501388	Pig.14062,MSTRG.11105	0.258287	-1.95295	4.2888e-08	2.98732e-06	yes	down	0.435452	0.259219	0.460068	0.195985	0.378176	0.477848	0.384913	0.35067	#N/A	#N/A	#N/A
Chr04_58527407_58562535	Pig.14062,MSTRG.11105	0.112925	-3.14656	0.00223923	0.0292445	yes	down	0.0340197	0.0583243	0.0600089	0.0290349	0.0214062	0.0149327	0.0507843	0.0217913	#N/A	#N/A	#N/A
Chr04_60923348_60923925	Pig.14072	42.0543	5.39418	6.25974e-06	0.000231355	yes	up	0	0.012961	0	0.754906	0.74208	0.612243	0.00432032	0.703076	CYP7A1-201	cholesterol 7-alpha-monooxygenase isoform X1 [Sus scrofa]	XP_020944405.1
Chr04_64703098_64717765		4.25082	2.08774	0.0115858	0.100913	yes	up	0.0204118	0	0.0400059	0.16695	0.292551	0.380785	0.0201392	0.280095	#N/A	#N/A	#N/A
Chr04_66562641_66564957	MSTRG.11201,Pig.04915	3.31703	1.72989	0.00945347	0.0866116	yes	up	0.0884511	0.0324024	0.120018	0.646025	0.91333	1.11996	0.0802905	0.893104	#N/A	#N/A	#N/A
Chr04_66658600_66674205	MSTRG.11201,Pig.04915	10.4701	3.38821	0.0341367	0.209092	yes	up	0.0136079	0	0	0.130657	0.214062	0.141861	0.00453596	0.162193	#N/A	#N/A	#N/A
Chr04_66745876_66758678	MSTRG.11201,Pig.04915	32.6077	5.02714	0.000124329	0.00275706	yes	up	0.0136079	0	0	0.486334	0.520883	0.507713	0.00453596	0.504977	#N/A	#N/A	#N/A
Chr04_67550881_67619743	Pig.04920	0.0876427	-3.51222	5.97168e-07	3.06077e-05	yes	down	0.183706	0.13609	0.0933472	0.0362936	0.0784893	0.0223991	0.137714	0.0457273	KIFAP3-201	kinesin-associated protein 3 isoform X2 [Sus scrofa]	XP_001927795.3
Chr04_67998566_68004542	Pig.04929	49.6977	5.63511	0.000199264	0.00403956	yes	up	0	0	0	0.232279	0.221197	0.209058	0	0.220845	F5-201	coagulation factor V precursor [Sus scrofa]	NP_999285.1
Chr04_69592517_69597236	Pig.04945	3.37574	1.7552	0.0456648	0.246728	yes	up	0	0.0194414	0.0133353	0.0943633	0.142708	0.179193	0.0109256	0.138755	DCAF6-204	DDB1- and CUL4-associated factor 6 isoform X5 [Sus scrofa]	XP_020945113.1
Chr04_76964647_76965737	Pig.10649	0.089728	-3.4783	0.0175262	0.135064	yes	down	0.0408236	0.0388829	0.0866795	0.0290349	0	0.0223991	0.055462	0.0171447	NCSTN-201	nicastrin isoform X1 [Sus scrofa]	XP_001928821.1
Chr04_77200909_77201276	Pig.10643	0.0592959	-4.07592	0.0286883	0.186946	yes	down	0.0204118	0	0	0	0	0	0.00680393	0	ATP1A4-203	PREDICTED: sodium/potassium-transporting ATPase subunit alpha-2 isoform X2 [Miniopterus natalensis]	NP_001165012.1
Chr04_80611471_80620253	Pig.10548	2.08979	1.06336	0.00517683	0.0556945	yes	up	0.129275	0.103688	0.180027	0.90008	1.0489	1.11249	0.137663	1.02049	CCT3-202	T-complex protein 1 subunit gamma [Sus scrofa]	NP_001231109.1
Chr04_81182357_81195763		6.56832	2.71552	2.12396e-05	0.000637539	yes	up	0.0136079	0.012961	0.0533413	0.587956	0.72781	0.500247	0.0266367	0.605337	#N/A	#N/A	#N/A
Chr04_81276788_81289066	Pig.10524	0.450741	-1.14963	0.0021609	0.0285648	yes	down	0.258549	0.162012	0.393392	0.56618	0.299686	0.395718	0.271318	0.420528	ASH1L-201	histone-lysine N-methyltransferase ASH1L isoform X1 [Sus scrofa]	XP_020945350.1
Chr04_84654052_84655582		5.38636	2.42931	0.0210523	0.153526	yes	up	0.0408236	0	0	0.145174	0.264009	0.321054	0.0136079	0.243413	#N/A	#N/A	#N/A
Chr04_85084890_85086082	MSTRG.11785	0.141556	-2.82055	0.00733768	0.0730139	yes	down	0.0748433	0.0194414	0.0400059	0.0362936	0.0285416	0	0.0447635	0.0216117	0	0	XP_023971852.1
Chr04_86395408_86418333	Pig.20616,MSTRG.11878	2.03446	1.02465	0.00601013	0.062078	yes	up	0.149687	0.0842462	0.100015	0.842011	0.692133	0.873566	0.111316	0.80257	#N/A	#N/A	#N/A
Chr04_88434469_88438102	Pig.13005	0.339124	-1.56011	0.0393476	0.228149	yes	down	0.0816472	0.0648048	0.0666766	0.0580697	0.135572	0.0746637	0.0710429	0.0894353	NOTCH2-201	neurogenic locus notch homolog protein 2 isoform X2 [Sus scrofa]	XP_020946348.1
Chr04_93436702_93440633	Pig.15770	0.0179709	-5.79819	0.0148201	0.120535	yes	down	0.0204118	0.0194414	0.020003	0	0	0	0.0199521	0	DENND2C-201	PREDICTED: DENN domain-containing protein 2C [Rhinolophus sinicus]	XP_005204089.1
Chr04_93596428_93597409	Pig.15772	28.0351	4.80916	0.000297922	0.00563975	yes	up	0	0	0	0.152433	0.164114	0.059731	0	0.125426	TRIM33-201	E3 ubiquitin-protein ligase TRIM33 isoform X1 [Sus scrofa]	XP_020945665.1
Chr04_98096686_98108020		1.81426e-07	-22.3941	0.00180601	0.0248406	yes	down	0	0.0583243	0	0	0	0	0.0194414	0	#N/A	#N/A	#N/A
Chr05_100664210_100668705	Pig.11743	2.04588	1.03272	0.0276042	0.183015	yes	up	0.115667	0.0388829	0.146688	0.682319	0.606508	0.783969	0.100413	0.690932	PAWR-201	PREDICTED: PRKC apoptosis WT1 regulator protein [Felis catus]	XP_020948471.1
Chr05_102030367_102031420	Pig.11741	3.71236	1.89234	0.0431649	0.23989	yes	up	0.0204118	0	0.0266706	0.0653284	0.363905	0.156794	0.0156941	0.195342	NAV3	neuron navigator 3 isoform X1 [Sus scrofa]	XP_020948732.1
Chr05_103278643_103282566	Pig.11737	4.21473	2.07544	0.0418847	0.236086	yes	up	0	0.0194414	0.0133353	0.217761	0.149843	0.16426	0.0109256	0.177288	ZDHHC17-202	palmitoyltransferase ZDHHC17 [Aotus nancymaae]	XP_020948474.1
Chr05_103840636_103841996	Pig.13236	6.42797	2.68436	0.0349018	0.210638	yes	up	0.0136079	0	0.0333383	0.304866	0.342499	0.306121	0.0156487	0.317829	HEBP1-201	heme-binding protein 1 [Sus scrofa]	NP_001011509.1
Chr05_104253525_104255276	MSTRG.14747	4.84329	2.27599	0.00318822	0.0389249	yes	up	0.0272157	0.012961	0.0133353	0.319383	0.313957	0.283722	0.0178373	0.305688	0	0	XP_020947997.1
Chr05_104505741_104586660	Pig.13247	0.0102001	-6.61528	0.0270304	0.180858	yes	down	0.0340197	0.0324024	0.0400059	0	0	0	0.035476	0	LRP6-201	LOW QUALITY PROTEIN: low-density lipoprotein receptor-related protein 6 [Sus scrofa]	XP_020948003.1
Chr05_104558652_104586660	Pig.13247	0.0949023	-3.39741	0.00028014	0.00534036	yes	down	0.0816472	0.0712853	0.100015	0.0435523	0.0285416	0.0149327	0.0843158	0.0290089	LRP6-201	LOW QUALITY PROTEIN: low-density lipoprotein receptor-related protein 6 [Sus scrofa]	XP_020948003.1
Chr05_104579027_104586660	Pig.13247	0.212326	-2.23564	0.012277	0.105161	yes	down	0.0748433	0.012961	0.0800119	0.0362936	0.0428123	0.0373319	0.0559387	0.0388126	LRP6-201	LOW QUALITY PROTEIN: low-density lipoprotein receptor-related protein 6 [Sus scrofa]	XP_020948003.1
Chr05_106667069_106690377	Pig.13290,MSTRG.14805	36.8112	5.20207	0.00236583	0.030601	yes	up	0	0	0	0.130657	0.0927601	0.261323	0	0.16158	#N/A	#N/A	#N/A
Chr05_106668101_106696417	Pig.13290,MSTRG.14805	30.9941	4.95392	0.0317435	0.19961	yes	up	0	0	0	0.152433	0.206926	0.059731	0	0.139697	#N/A	#N/A	#N/A
Chr05_106678795_106681855	Pig.13290,MSTRG.14805	34.0221	5.0884	0.0484278	0.255197	yes	up	0	0	0	0.123398	0.199791	0.134395	0	0.152528	#N/A	#N/A	#N/A
Chr05_106686520_106690377	Pig.13290,MSTRG.14805	20.7018	4.37169	0.0297325	0.190824	yes	up	0	0	0	0.0871046	0.0998955	0.0895965	0	0.0921988	#N/A	#N/A	#N/A
Chr05_106696908_106702791	Pig.13290,MSTRG.14805	54.2799	5.76235	0.000588878	0.00966578	yes	up	0	0	0	0.304866	0.0927601	0.313588	0	0.237071	#N/A	#N/A	#N/A
Chr05_106754199_106756664	Pig.13291,MSTRG.14807	131.184	7.03544	2.99256e-07	1.64228e-05	yes	up	0	0	0	0.500851	0.599373	0.649574	0	0.583266	#N/A	#N/A	#N/A
Chr05_20526478_20580658	Pig.19106	0.242644	-2.04309	0.000308082	0.00575193	yes	down	0.108863	0.110168	0.153356	0.0871046	0.107031	0.134395	0.124129	0.10951	TBC1D22A-201	LOW QUALITY PROTEIN: TBC1 domain family member 22A [Sus scrofa]	XP_020947020.1
Chr05_20526478_20598492	Pig.19106	0.299161	-1.74101	0.0107745	0.0963276	yes	down	0.142883	0.0388829	0.120018	0.0798458	0.135572	0.0895965	0.100594	0.101672	TBC1D22A-201	LOW QUALITY PROTEIN: TBC1 domain family member 22A [Sus scrofa]	XP_020947020.1
Chr05_20526478_20617636	Pig.19106	0.102746	-3.28284	0.00170843	0.0239225	yes	down	0.163294	0	0.0400059	0.0145174	0.0214062	0.0298655	0.0677668	0.0219297	TBC1D22A-201	LOW QUALITY PROTEIN: TBC1 domain family member 22A [Sus scrofa]	XP_020947020.1
Chr05_24204646_24215675	Pig.14028	45.2648	5.50032	0.00788489	0.0767717	yes	up	0	0	0	0.0943633	0.349634	0.171727	0	0.205241	ARFGAP3-201	ADP-ribosylation factor GTPase-activating protein 3 isoform X1 [Sus scrofa]	XP_003481574.1
Chr05_25794915_25795215	Pig.18991	0.0210101	-5.57277	0.00219046	0.0288516	yes	down	0.0272157	0.012961	0.0133353	0	0	0	0.0178373	0	ITGA7-201	LOW QUALITY PROTEIN: integrin alpha-7 [Sus scrofa]	XP_020946892.1
Chr05_28637762_28651868	Pig.17270	25.2267	4.65688	8.7183e-07	4.19173e-05	yes	up	0.0136079	0.0194414	0	1.03074	0.799164	1.35888	0.0110164	1.06293	RBMS2-201	RNA-binding motif, single-stranded-interacting protein 2 [Sus scrofa]	XP_020948550.1
Chr05_28687240_28690035		44.1778	5.46525	0.000152548	0.00323747	yes	up	0	0	0	0.159692	0.214062	0.216525	0	0.196759	#N/A	#N/A	#N/A
Chr05_31301375_31326900	Pig.05460	0.225416	-2.14934	0.0113537	0.100464	yes	down	0.0408236	0.0518438	0.0333383	0.0725871	0.0356769	0	0.0420019	0.036088	XPOT-201	exportin-T isoform X1 [Sus scrofa]	XP_020947599.1
Chr05_32183948_32242667		0.01142	-6.4523	4.87859e-05	0.00128045	yes	down	0.0204118	0.0583243	0	0	0	0	0.0262454	0	#N/A	#N/A	#N/A
Chr05_32203123_32242667	Pig.05468	0.0393517	-4.66743	0.0162649	0.129003	yes	down	0	0.012961	0.0133353	0	0	0	0.00876542	0	MSRB3-201	methionine-R-sulfoxide reductase B3 isoform X2 [Sus scrofa]	XP_020947615.1
Chr05_33008943_33026515	Pig.05474	3.15166	1.65611	0.00865756	0.0812375	yes	up	0.0204118	0.0259219	0.0400059	0.304866	0.420988	0.253857	0.0287799	0.32657	IRAK3-201	interleukin-1 receptor-associated kinase 3 [Sus scrofa]	XP_020947619.1
Chr05_36457974_36459199	Pig.05498	5.7958	2.53501	0.00213463	0.028416	yes	up	0.0408236	0	0.0333383	0.355677	0.442394	0.59731	0.0247206	0.465127	RAB3IP	rab-3A-interacting protein isoform X1 [Sus scrofa]	XP_020947636.1
Chr05_36457974_36472925	Pig.05498	23.4228	4.54984	0.0478923	0.254349	yes	up	0	0	0	0.0653284	0.121302	0.126928	0	0.104519	RAB3IP	rab-3A-interacting protein isoform X1 [Sus scrofa]	XP_020947636.1
Chr05_42398007_42403290	MSTRG.13728,Pig.20735	0.280699	-1.83291	0.000714211	0.0114802	yes	down	0.129275	0.0712853	0.0600089	0.130657	0.0570831	0.0746637	0.0868563	0.0874679	#N/A	#N/A	#N/A
Chr05_43684815_43735400	Pig.06613	34.0252	5.08853	0.0112474	0.0997955	yes	up	0	0	0	0.0653284	0.0998955	0.283722	0	0.149649	FGD4	FYVE, RhoGEF and PH domain-containing protein 4 isoform X1 [Sus scrofa]	XP_020947725.1
Chr05_43684815_43744217	Pig.06613	23.7902	4.5723	0.00046868	0.00802463	yes	up	0	0	0	0.0871046	0.142708	0.0895965	0	0.10647	FGD4	FYVE, RhoGEF and PH domain-containing protein 4 isoform X1 [Sus scrofa]	XP_020947725.1
Chr05_43729794_43735400	Pig.06613	40.2614	5.33133	0.00194854	0.026599	yes	up	0	0	0	0.137916	0.149843	0.24639	0	0.17805	FGD4	FYVE, RhoGEF and PH domain-containing protein 4 isoform X1 [Sus scrofa]	XP_020947725.1
Chr05_43729794_43744217	Pig.06613	25.0992	4.64957	0.00346226	0.0410548	yes	up	0	0	0	0.0871046	0.121302	0.126928	0	0.111778	FGD4	FYVE, RhoGEF and PH domain-containing protein 4 isoform X1 [Sus scrofa]	XP_020947725.1
Chr05_44746479_44761669	Pig.06608	4.0555	2.01988	0.0136062	0.112515	yes	up	0.0272157	0	0.0400059	0.326642	0.292551	0.268789	0.0224072	0.295994	DENND5B-201	DENN domain-containing protein 5B isoform X1 [Sus scrofa]	XP_020947749.1
Chr05_4770639_4793901	Pig.17058	0.337611	-1.56657	0.0240487	0.166867	yes	down	0.0544315	0.0453634	0.0400059	0.0362936	0.0856247	0.0522646	0.0466003	0.0580609	RBFOX2-202	RNA binding protein fox-1 homolog 2 isoform X11 [Sus scrofa]	XP_024599261.1
Chr05_48391369_48407553	Pig.06589	0.00223249	-8.80713	2.2171e-10	2.93792e-08	yes	down	0.204118	0.155531	0.120018	0	0	0	0.159889	0	ARNTL2-201	aryl hydrocarbon receptor nuclear translocator-like protein 2 isoform X1 [Sus scrofa]	XP_020947810.1
Chr05_48391369_48424370	Pig.06589	0.00596325	-7.38969	3.47463e-05	0.000953418	yes	down	0.0612354	0.0324024	0.106683	0	0	0	0.0667734	0	ARNTL2-201	aryl hydrocarbon receptor nuclear translocator-like protein 2 isoform X1 [Sus scrofa]	XP_020947810.1
Chr05_49300221_49310929	Pig.06583	0.335023	-1.57767	0.0286974	0.186946	yes	down	0.0816472	0.0259219	0.0800119	0.101622	0.0499477	0.059731	0.062527	0.0704336	ITPR2-202	inositol 1,4,5-trisphosphate receptor type 2 isoform X1 [Sus scrofa]	XP_020948578.1
Chr05_51807575_51853508	Pig.06573	10.3289	3.36862	0.00817818	0.0785019	yes	up	0	0	0.020003	0.145174	0.221197	0.313588	0.00666766	0.226653	SOX5-201	transcription factor SOX-5 isoform X2 [Sus scrofa]	XP_020948580.1
Chr05_51853298_51855700	Pig.06573	25.0486	4.64666	0.00745482	0.0735312	yes	up	0	0	0	0.108881	0.121302	0.104529	0	0.111571	SOX5-201	transcription factor SOX-5 isoform X2 [Sus scrofa]	XP_020948580.1
Chr05_51935997_51953715	Pig.06573	19.5075	4.28596	3.3362e-07	1.81256e-05	yes	up	0.0204118	0.0259219	0.0666766	2.14132	2.88983	2.69536	0.0376701	2.5755	SOX5-201	transcription factor SOX-5 isoform X2 [Sus scrofa]	XP_020948580.1
Chr05_53091529_53106088	Pig.06570	0.173402	-2.52781	0.0458921	0.24712	yes	down	0.0340197	0.0259219	0.0600089	0.050811	0.0214062	0	0.0399835	0.0240724	C2CD5-201	C2 domain-containing protein 5 isoform X4 [Sus scrofa]	XP_020947875.1
Chr05_54141653_54170120	MSTRG.13889,Pig.09598	41.6409	5.37993	7.12099e-05	0.0017349	yes	up	0	0	0	0.246796	0.156979	0.149327	0	0.184367	#N/A	#N/A	#N/A
Chr05_55847922_55854495	Pig.09594	27.7518	4.79451	0.0192565	0.14371	yes	up	0	0	0	0.123398	0.0784893	0.16426	0	0.122049	PLEKHA5-204	pleckstrin homology domain-containing family A member 5 isoform X6 [Sus scrofa]	XP_020947923.1
Chr05_61728003_61728231	Pig.18710	0.147359	-2.76259	5.25968e-05	0.00134792	yes	down	0.115667	0.2657	0.153356	0.195985	0.0713539	0.0522646	0.178241	0.106535	PTMS	PREDICTED: parathymosin, partial [Camelus bactrianus]	XP_010956138.1
Chr05_75269998_75283400		5.6866	2.50757	0.045897	0.24712	yes	up	0	0.012961	0	0.0871046	0.114166	0.0895965	0.00432032	0.0969558	#N/A	#N/A	#N/A
Chr05_75858259_75868552	MSTRG.14257	30.7858	4.94419	0.012459	0.106097	yes	up	0	0	0	0.210503	0.0998955	0.0970628	0	0.13582	0	0	XP_020948239.1
Chr05_78144274_78144998		5.00778	2.32417	0.0485864	0.255785	yes	up	0.0408236	0	0.0133353	0.217761	0.256874	0.395718	0.018053	0.290118	#N/A	#N/A	#N/A
Chr05_78171662_78194922	Pig.13110	13.7195	3.77816	0.00593037	0.0617236	yes	up	0.0136079	0	0	0.246796	0.128437	0.253857	0.00453596	0.209697	SLC41A2-201	LOW QUALITY PROTEIN: solute carrier family 41 member 2 [Sus scrofa]	XP_005664240.2
Chr05_79182843_79198779	Pig.13120	31.8595	4.99365	0.000224942	0.00441195	yes	up	0	0	0	0.050811	0.142708	0.231458	0	0.141659	NT5DC3-201	LOW QUALITY PROTEIN: 5'-nucleotidase domain-containing protein 3 [Sus scrofa]	XP_005664246.2
Chr05_81215241_81234546	Pig.04043	0.165323	-2.59664	0.000469691	0.00802463	yes	down	0.122471	0.0777657	0.106683	0.0290349	0.0713539	0.0821301	0.102306	0.0608396	GNPTAB-201	N-acetylglucosamine-1-phosphotransferase subunits alpha/beta isoform X6 [Sus scrofa]	XP_020948331.1
Chr05_82451497_82468552	Pig.04054	30.5084	4.93113	0.0283591	0.185632	yes	up	0	0	0	0.145174	0.199791	0.0671974	0	0.137388	NR1H4-201	bile acid receptor isoform X1 [Sus scrofa]	XP_020946591.1
Chr05_86446353_86447618	MSTRG.14491	55.6048	5.79714	0.000491764	0.00832322	yes	up	0	0	0	0.413747	0.221197	0.104529	0	0.246491	0	0	XP_001925096.2
Chr05_87087100_87106917		8.3724	3.06564	0.0364038	0.215712	yes	up	0.0204118	0	0	0.246796	0.18552	0.134395	0.00680393	0.188904	#N/A	#N/A	#N/A
Chr05_99164719_99181403	MSTRG.14656,Pig.11752	5.41547	2.43709	3.08089e-05	0.00087286	yes	up	0.0748433	0	0.0400059	0.696836	0.74208	0.619709	0.0382831	0.686209	#N/A	#N/A	#N/A
Chr05_99164719_99208044	MSTRG.14656,Pig.11752	16.0637	4.00573	0.00732999	0.0730139	yes	up	0	0	0.0133353	0.181468	0.392446	0.156794	0.0044451	0.243569	#N/A	#N/A	#N/A
Chr05_99227727_99243976	MSTRG.14656,Pig.11752	53.6483	5.74546	0.000104493	0.00238534	yes	up	0	0	0	0.261314	0.164114	0.283722	0	0.236383	#N/A	#N/A	#N/A
Chr06_100219067_100265828	Pig.08550	0.0369642	-4.75773	0.0467346	0.249911	yes	down	0.0340197	0	0	0	0	0	0.0113399	0	KIF1A-202	kinesin-like protein KIF1B isoform X2 [Sus scrofa]	XP_020950974.1
Chr06_101805189_101814144	Pig.08532	48.2186	5.59152	0.00178262	0.0246437	yes	up	0	0	0	0.188727	0.264009	0.194126	0	0.215621	RERE	arginine-glutamic acid dipeptide (RE) repeats, isoform CRA_c [Homo sapiens]	ELR58553.1
Chr06_101805189_101839069	Pig.08532	54.6141	5.7712	0.000244506	0.00477843	yes	up	0	0	0	0.22502	0.192656	0.306121	0	0.241266	RERE	arginine-glutamic acid dipeptide (RE) repeats, isoform CRA_c [Homo sapiens]	ELR58553.1
Chr06_10288787_10295546	Pig.14717	4.97539	2.31481	0.0420708	0.236616	yes	up	0.0340197	0	0	0.203244	0.178385	0.179193	0.0113399	0.186941	ZYG11B-201	protein zyg-11 homolog B [Sus scrofa]	XP_020952290.1
Chr06_10402432_10406397	Pig.14715	5.57129	2.47801	0.0343181	0.20973	yes	up	0.0136079	0	0.0266706	0.181468	0.313957	0.231458	0.0134262	0.242294	ECHDC2-201	enoyl-CoA hydratase domain-containing protein 2, mitochondrial isoform X5 [Sus scrofa]	XP_020952280.1
Chr06_108820298_108820413	Pig.16623	22.3466	4.48198	0.000952384	0.0146167	yes	up	0	0	0	0.123398	0.0998955	0.0746637	0	0.0993191	A1BG	alpha-1B-glycoprotein [Sus scrofa]	XP_003128180.1
Chr06_11538093_11556397		0.144153	-2.79433	0.00548726	0.0583411	yes	down	0.0476275	0.0453634	0.0866795	0.0362936	0.0570831	0	0.0598901	0.0311256	#N/A	#N/A	#N/A
Chr06_116825520_116839690	Pig.20473	0.202895	-2.30119	0.0429177	0.23933	yes	down	0.0408236	0.0583243	0.0266706	0.0217761	0.0356769	0.0447982	0.0419395	0.0340838	MYH14-201	myosin-14 isoform X2 [Sus scrofa]	XP_020950441.1
Chr06_11834138_11846930	Pig.12437	25.2274	4.65692	0.0173766	0.134303	yes	up	0	0	0	0.123398	0.0998955	0.111996	0	0.111763	MRPL37-201	39S ribosomal protein L37, mitochondrial [Sus scrofa]	XP_020952251.1
Chr06_124342503_124342926	Pig.16121	3.26208	1.70579	0.00566613	0.0597749	yes	up	0.0816472	0.0583243	0.020003	0.573438	0.706404	0.67944	0.0533248	0.653094	ECH1-202	delta(3,5)-Delta(2,4)-dienoyl-CoA isomerase, mitochondrial [Sus scrofa]	NP_001038072.1(delta(3,5)-Delta
Chr06_12458471_12462570	Pig.12444	26.1402	4.7082	5.17966e-05	0.00133663	yes	up	0.0136079	0	0	0.355677	0.456665	0.41065	0.00453596	0.407664	DHCR24-202	delta(24)-sterol reductase [Sus scrofa]	NP_001230283.1(delta
Chr06_134499265_134501848	MSTRG.18159,Pig.13993	6.88852	2.78419	0.043502	0.240924	yes	up	0	0	0.0133353	0.108881	0.121302	0.0821301	0.0044451	0.104104	#N/A	#N/A	#N/A
Chr06_134537417_134552372	MSTRG.18159,Pig.13994	2.19003	1.13095	0.0199823	0.148312	yes	up	0.102059	0.0842462	0.0600089	0.609732	0.713539	0.671974	0.0821047	0.665081	#N/A	#N/A	#N/A
Chr06_134537417_134627211	Pig.13994	0.256267	-1.96428	0.00258696	0.0328387	yes	down	0.0884511	0.0518438	0.0733442	0.0798458	0.0856247	0.0298655	0.0712131	0.065112	PHKB-201	phosphorylase b kinase regulatory subunit beta isoform X5 [Sus scrofa]	XP_020949897.1
Chr06_136689995_136695881		13.2117	3.72375	0.0410851	0.234224	yes	up	0	0	0	0.0798458	0.0428123	0.0522646	0	0.0583076	#N/A	#N/A	#N/A
Chr06_137024884_137029577	Pig.15005	0.386773	-1.37044	0.0388943	0.226488	yes	down	0.0272157	0.0712853	0.0866795	0.101622	0.0998955	0.0671974	0.0617268	0.0895716	HEATR3-201	HEAT repeat-containing protein 3 isoform X1 [Sus scrofa]	XP_020949878.1
Chr06_141789140_141864082		69.2274	6.11327	0.00200183	0.0271899	yes	up	0.0272157	0	0.0533413	5.29886	6.16498	5.39819	0.0268523	5.62067	#N/A	#N/A	#N/A
Chr06_14240820_14246715	Pig.12450	7.56414	2.91918	0.0480117	0.254485	yes	up	0	0	0	0.0145174	0.0499477	0.0373319	0	0.0339323	PRKAA2-201	5'-AMP-activated protein kinase catalytic subunit alpha-2 [Sus scrofa]	NP_999431.1
Chr06_143325041_143395663	MSTRG.18290	0.0159805	-5.96755	0.00398521	0.0457752	yes	down	0.0272157	0.0324024	0	0	0	0	0.0198727	0	0	0	XP_020949782.1
Chr06_143340685_143395663	MSTRG.18296,MSTRG.18290,Pig.14278	0.143078	-2.80512	0.0447696	0.244948	yes	down	0.0544315	0.0388829	0.0400059	0.0217761	0.0499477	0	0.0444401	0.023908	#N/A	#N/A	#N/A
Chr06_143795848_143796187		0.0620575	-4.01025	0.00444866	0.0503533	yes	down	0.0816472	0.0518438	0.0533413	0.0145174	0.0285416	0	0.0622774	0.014353	#N/A	#N/A	#N/A
Chr06_14381044_14387920	Pig.12451	43.5885	5.44588	0.000878076	0.0136693	yes	up	0	0	0	0.108881	0.285416	0.194126	0	0.196141	FYB2-201	activation-dependent, raft-recruited ADAP-like phosphoprotein isoform X1 [Sus scrofa]	XP_020952236.1
Chr06_144070611_144094877	Pig.14246	0.0101811	-6.61797	0.00184308	0.0252864	yes	down	0.0408236	0.0324024	0.0333383	0	0	0	0.0355214	0	LRRC36-201	leucine-rich repeat-containing protein 36 isoform X2 [Sus scrofa]	XP_003126990.1
Chr06_14477450_14494363	MSTRG.15243	187.905	7.55386	6.86297e-08	4.43887e-06	yes	up	0	0	0	0.871046	0.891924	0.746637	0	0.836536	0	0	NP_001090919.2
Chr06_153612359_153623429	MSTRG.18532	347.924	8.44263	0.00016121	0.00336867	yes	up	0	0	0	0.812976	0.627914	3.11348	0	1.51812	0	0	XP_020949549.1
Chr06_153612359_153633119		137.671	7.10508	0.000164993	0.00343452	yes	up	0	0	0	0.704095	0.706404	0.43305	0	0.614516	#N/A	#N/A	#N/A
Chr06_153617949_153633119		40.9021	5.3541	0.00346846	0.0410548	yes	up	0	0	0	0.232279	0.235468	0.0821301	0	0.183292	#N/A	#N/A	#N/A
Chr06_154116588_154120137	Pig.12804	22.467	4.48974	0.00963448	0.0879733	yes	up	0	0	0	0.130657	0.0856247	0.0821301	0	0.0994705	CDH1-203	cadherin-1 precursor [Sus scrofa]	NP_001156532.1
Chr06_154116588_154127479	Pig.12804	19.8328	4.30981	0.0304149	0.193949	yes	up	0	0	0	0.0871046	0.0713539	0.104529	0	0.0876626	CDH1-203	cadherin-1 precursor [Sus scrofa]	NP_001156532.1
Chr06_154848646_154859605	Pig.12817	0.449745	-1.15282	0.0358704	0.213455	yes	down	0.136079	0.0972072	0.180027	0.188727	0.285416	0.186659	0.137771	0.220267	NFAT5-203	nuclear factor of activated T-cells 5 isoform X3 [Sus scrofa]	XP_003355818.1
Chr06_154848646_154896290		0.0158017	-5.98377	0.0336131	0.207523	yes	down	0.0408236	0.012961	0.020003	0	0	0	0.0245958	0	#N/A	#N/A	#N/A
Chr06_155000411_155008064		15.3481	3.93999	9.96141e-09	8.20005e-07	yes	up	0	0.0259219	0.0266706	0.936374	1.09171	0.955696	0.0175308	0.994595	#N/A	#N/A	#N/A
Chr06_155000411_155071136		28.0586	4.81037	0.0154345	0.1246	yes	up	0	0	0	0.0871046	0.171249	0.119462	0	0.125939	#N/A	#N/A	#N/A
Chr06_157262381_157268589	MSTRG.18617	32.7787	5.03469	0.00432887	0.0492024	yes	up	0	0	0	0.188727	0.0784893	0.16426	0	0.143825	0	0	XP_020949508.1
Chr06_157272705_157273018	MSTRG.18617	25.8948	4.69459	0.016496	0.130265	yes	up	0	0	0	0.145174	0.0856247	0.111996	0	0.114265	0	0	XP_020949508.1
Chr06_160725112_160742417	Pig.15713	0.32255	-1.63241	0.0053419	0.0570188	yes	down	0.102059	0.0712853	0.146688	0.181468	0.0570831	0.119462	0.106678	0.119338	CFDP1-201	craniofacial development protein 1 [Sus scrofa]	XP_020949434.1
Chr06_16454294_16468192		52.1332	5.70413	0.0133559	0.111385	yes	up	0	0	0	0.297607	0.249739	0.149327	0	0.232224	#N/A	#N/A	#N/A
Chr06_16875956_16911354	Pig.15137	13.5389	3.75904	3.15775e-06	0.000124319	yes	up	0.0204118	0	0.0666766	1.32834	1.34859	1.09756	0.0290295	1.25816	FGGY-202	FGGY carbohydrate kinase domain-containing protein isoform X5 [Sus scrofa]	XP_020953459.1
Chr06_169608196_169618090	Pig.15499	11.728	3.55188	1.82611e-06	7.75099e-05	yes	up	0.0204118	0	0.0133353	0.442782	0.44953	0.462915	0.011249	0.451742	MTHFSD-201	methenyltetrahydrofolate synthase domain-containing protein isoform X1 [Sus scrofa]	XP_020949357.1
Chr06_170205102_170210126	Pig.15494	9.59458	3.26222	0.0431328	0.23989	yes	up	0.0204118	0	0	0.116139	0.264009	0.268789	0.00680393	0.216313	FBXO31-201	F-box only protein 31 isoform X1 [Sus scrofa]	XP_020949342.1
Chr06_19602139_19625302	Pig.15148	8.6574	3.11393	0.0343063	0.20973	yes	up	0	0	0.0133353	0.101622	0.121302	0.16426	0.0044451	0.129061	PATJ-202	inaD-like protein isoform X5 [Sus scrofa]	XP_020952216.1
Chr06_27510977_27516672	Pig.05292	3.05	1.60881	0.0174877	0.134958	yes	up	0.0340197	0.012961	0.0266706	0.246796	0.256874	0.276256	0.0245504	0.259975	ANKRD13C-203	ankyrin repeat domain-containing protein 13C [Sus scrofa]	XP_003127975.1
Chr06_2760151_2760886		0.00735488	-7.08708	0.0230056	0.163171	yes	down	0.0408236	0.0388829	0.0733442	0	0	0	0.0510169	0	#N/A	#N/A	#N/A
Chr06_3676548_3758580	MSTRG.14981	5.23047	2.38694	0.013772	0.113713	yes	up	0.0204118	0.0194414	0	0.203244	0.256874	0.335987	0.0132844	0.265368	0	0	XP_003128092.3
Chr06_3710003_3758580	MSTRG.14981	3.46788	1.79405	1.60685e-06	7.15577e-05	yes	up	0.108863	0.110168	0.11335	1.1251	1.54838	1.53807	0.110794	1.40385	0	0	XP_003128092.3
Chr06_3732683_3758580	MSTRG.14981	4.36218	2.12505	1.66228e-06	7.2832e-05	yes	up	0.0748433	0.0648048	0.0600089	0.907339	1.18447	1.07516	0.0665523	1.05566	0	0	XP_003128092.3
Chr06_40368775_40376408		0.143174	-2.80416	0.000637277	0.0103974	yes	down	0.0612354	0.0259219	0.0266706	0.0290349	0.0285416	0	0.0379426	0.0191921	#N/A	#N/A	#N/A
Chr06_49238260_49238933	Pig.02789	0.251844	-1.9894	7.59733e-05	0.00181036	yes	down	0.265353	0.291622	0.34005	0.239538	0.392446	0.216525	0.299008	0.282836	KIAA1328-202	protein hinderin isoform X5 [Sus scrofa]	XP_020951945.1
Chr06_49667205_49680000	Pig.02792	0.0887162	-3.49466	0.00494355	0.0541498	yes	down	0.0476275	0	0.0266706	0	0.0214062	0	0.0247661	0.00713539	FHOD3-206	FH1/FH2 domain-containing protein 3 isoform X2 [Sus scrofa]	XP_020951933.1
Chr06_511217_535012	Pig.18894	0.0189737	-5.71986	0.039229	0.227704	yes	down	0.0136079	0.0324024	0	0	0	0	0.0153368	0	FOXJ3-202	forkhead box protein J3 isoform X1 [Sus scrofa]	XP_020952586.1
Chr06_54582012_54601840	Pig.03599	0.324244	-1.62485	0.0200798	0.148832	yes	down	0.0884511	0.0259219	0.0800119	0.050811	0.0570831	0.104529	0.064795	0.0708078	TRAPPC8-201	trafficking protein particle complex subunit 8 isoform X1 [Sus scrofa]	XP_020951870.1
Chr06_54767318_54799712	Pig.03600	0.0830195	-3.59041	0.000421259	0.00733557	yes	down	0.0748433	0.0777657	0.0600089	0.0290349	0	0.0373319	0.0708726	0.0221222	B4GALT6-201	beta-1,4-galactosyltransferase 6 [Sus scrofa]	XP_003127934.2
Chr06_54767318_54808170	Pig.03600	0.0691388	-3.85436	0.0222593	0.159671	yes	down	0.0136079	0.0194414	0.0933472	0	0.0142708	0.0149327	0.0421322	0.00973451	B4GALT6-201	beta-1,4-galactosyltransferase 6 [Sus scrofa]	XP_003127934.2
Chr06_54767318_54811972	Pig.03600	0.0120758	-6.37174	0.0230876	0.163416	yes	down	0.0408236	0.0388829	0	0	0	0	0.0265688	0	B4GALT6-201	beta-1,4-galactosyltransferase 6 [Sus scrofa]	XP_003127934.2
Chr06_557243_613584	Pig.18894	4.53786	2.18201	0.0488589	0.256474	yes	up	0.0136079	0.012961	0	0.174209	0.171249	0.111996	0.00885628	0.152485	FOXJ3-202	forkhead box protein J3 isoform X1 [Sus scrofa]	XP_020952586.1
Chr06_59501294_59527059	Pig.03615	0.0512278	-4.28693	1.58197e-11	3.18328e-09	yes	down	0.163294	0.149051	0.146688	0.0217761	0.0356769	0.0298655	0.153011	0.0291062	TAF4B-201	transcription initiation factor TFIID subunit 4B [Sus scrofa]	XP_003127923.1
Chr06_61228450_61283077	MSTRG.15623,Pig.03622	0.469188	-1.09176	0.043669	0.241394	yes	down	0.122471	0.0712853	0.0933472	0.137916	0.171249	0.171727	0.0957011	0.160297	#N/A	#N/A	#N/A
Chr06_61317581_61338765	MSTRG.15623,Pig.03622	20.8096	4.37918	0.0352726	0.211053	yes	up	0	0	0	0.101622	0.0856247	0.0895965	0	0.092281	#N/A	#N/A	#N/A
Chr06_61490852_61503632	Pig.03624	5.34972	2.41946	0.00496867	0.0543155	yes	up	0.0340197	0	0.0466736	0.515369	0.72781	0.16426	0.0268978	0.469146	TTC39C-202	tetratricopeptide repeat protein 39C isoform X1 [Sus scrofa]	XP_003356432.3
Chr06_63426858_63485048	Pig.03641	0.214711	-2.21953	0.00831596	0.0789216	yes	down	0.0612354	0.0842462	0.0533413	0.0943633	0.0570831	0.0149327	0.0662743	0.0554597	MIB1-201	PREDICTED: E3 ubiquitin-protein ligase MIB1 [Oryctolagus cuniculus]	XP_002713497.1
Chr06_63650554_63671201		0.0308007	-5.02089	0.00158984	0.0225268	yes	down	0.0136079	0.0194414	0	0	0	0	0.0110164	0	#N/A	#N/A	#N/A
Chr06_64342937_64360426	Pig.03652	0.181224	-2.46416	0.0130344	0.109622	yes	down	0.0544315	0.0259219	0.0333383	0.0290349	0.0214062	0.0223991	0.0378972	0.02428	THOC1-201	THO complex subunit 1 isoform X1 [Sus scrofa]	XP_020951816.1
Chr06_71718259_71725788	Pig.03686	3.76055	1.91094	0.0278505	0.183779	yes	up	0.0340197	0	0.0133353	0.22502	0.235468	0.134395	0.015785	0.198294	NDUFV2-202	NADH dehydrogenase [ubiquinone]	NP_001090944.2
Chr06_71718259_71734424	Pig.03686	2.75952	1.46442	0.0124236	0.105962	yes	up	0	0.0259219	0.0466736	0.290349	0.256874	0.171727	0.0241985	0.23965	NDUFV2-202	NADH dehydrogenase [ubiquinone]	NP_001090944.2
Chr06_71770746_71807159		16.4834	4.04294	0.00787616	0.0767717	yes	up	0	0	0	0.0653284	0.0642185	0.0895965	0	0.0730478	#N/A	#N/A	#N/A
Chr06_71786235_71807159	Pig.03687	17.6415	4.1409	0.0143587	0.117841	yes	up	0	0	0	0.0653284	0.0642185	0.104529	0	0.0780254	ANKRD12-201	ankyrin repeat domain-containing protein 12 isoform X1 [Sus scrofa]	XP_020951722.1
Chr06_71794909_71807159	Pig.03687	6.27739	2.65017	0.0404989	0.2321	yes	up	0.0136079	0	0	0.101622	0.0927601	0.0970628	0.00453596	0.0971483	ANKRD12-201	ankyrin repeat domain-containing protein 12 isoform X1 [Sus scrofa]	XP_020951722.1
Chr06_75473544_75484018	Pig.02961	4.76313	2.25191	0.0495034	0.258608	yes	up	0.0340197	0	0	0.181468	0.192656	0.16426	0.0113399	0.179461	MACF1-201	PREDICTED: microtubule-actin cross-linking factor 1, isoforms 1/2/3/5 isoform X6 [Balaenoptera acutorostrata scammoni]	XP_029086933.1
Chr06_770215_796587		6.71332	2.74703	0.0216617	0.156292	yes	up	0.0272157	0	0	0.195985	0.171249	0.238924	0.00907191	0.202053	#N/A	#N/A	#N/A
Chr06_78351325_78351937	Pig.02996,MSTRG.15949	0.400454	-1.32029	0.0214166	0.155556	yes	down	0.0816472	0.0388829	0.140021	0.0435523	0.171249	0.141861	0.0868503	0.118888	#N/A	#N/A	#N/A
Chr06_78493883_78508305	Pig.03001	9.60275	3.26345	0.0179973	0.137717	yes	up	0	0	0.0133353	0.101622	0.18552	0.149327	0.0044451	0.14549	AGO1-202	protein argonaute-3 [Bos taurus]	NP_001001133.2
Chr06_785554_796587	Pig.18898	2.89382	1.53297	0.0457308	0.246728	yes	up	0.0272157	0.0259219	0.0133353	0.145174	0.335363	0.238924	0.0221577	0.23982	Ccdc30	coiled-coil domain-containing protein 30 [Sus scrofa]	XP_020952582.1
Chr06_79118478_79127999	Pig.03010	0.451351	-1.14768	0.0173781	0.134303	yes	down	0.15649	0.0194414	0.206697	0.16695	0.199791	0.194126	0.127543	0.186956	ZMYM4-201	zinc finger MYM-type protein 4 isoform X2 [Sus scrofa]	XP_020951559.1
Chr06_82248210_82257925		11.4899	3.5223	0.012508	0.106347	yes	up	0	0	0	0.0435523	0.0499477	0.059731	0	0.051077	#N/A	#N/A	#N/A
Chr06_82809042_82819570	Pig.03074	16.9945	4.08699	0.0114779	0.100905	yes	up	0	0	0	0.0362936	0.0784893	0.111996	0	0.0755928	SNRNP40-202	PREDICTED: U5 small nuclear ribonucleoprotein 40 kDa protein [Equus caballus]	XP_003356314.1
Chr06_83054379_83055628	Pig.03076	26.2585	4.71471	0.00309109	0.0380814	yes	up	0	0	0	0.0943633	0.178385	0.0821301	0	0.118293	PUM1-201	pumilio homolog 1 isoform X17 [Sus scrofa]	XP_020951410.1
Chr06_86668446_86672730	Pig.03134	0.418229	-1.25764	4.90796e-05	0.00128197	yes	down	0.251746	0.2657	0.240036	0.319383	0.470936	0.388251	0.252494	0.392857	ARID1A-201	AT-rich interactive domain-containing protein 1A isoform X1 [Sus scrofa]	XP_020951289.1
Chr06_9306511_9324795	Pig.14732	9.486	3.2458	0.0297119	0.190824	yes	up	0.0136079	0	0	0.159692	0.192656	0.0895965	0.00453596	0.147315	OSBPL9-202	oxysterol-binding protein-related protein 9 isoform X1 [Sus scrofa]	XP_005665492.2
Chr06_9307653_9324795	Pig.14732	6.86786	2.77986	0.000506326	0.00846421	yes	up	0.0340197	0	0.020003	0.333901	0.478071	0.425583	0.0180075	0.412518	OSBPL9-202	oxysterol-binding protein-related protein 9 isoform X1 [Sus scrofa]	XP_005665492.2
Chr06_95838274_95838750	Pig.08610	0.0320832	-4.96204	0.0311429	0.197432	yes	down	0.0204118	0	0.020003	0	0	0	0.0134716	0	SPEN-201	LOW QUALITY PROTEIN: msx2-interacting protein [Sus scrofa]	XP_020951052.1
Chr06_96048045_96051495	Pig.08606	4.06814	2.02437	0.0226662	0.161396	yes	up	0	0.0518438	0	0.203244	0.363905	0.388251	0.0172813	0.318467	DDI1-201	PREDICTED: protein DDI1 homolog 2 isoform X2 [Orcinus orca]	XP_012389449.1
Chr06_96048045_96062663	Pig.08606	12.6057	3.65601	3.00719e-06	0.000119256	yes	up	0	0.0194414	0.020003	0.537145	0.734945	0.567444	0.0131481	0.613178	DDI1-201	PREDICTED: protein DDI1 homolog 2 isoform X2 [Orcinus orca]	XP_012389449.1
Chr06_96055937_96062663	Pig.08606	30.6423	4.93745	0.00136514	0.0198842	yes	up	0	0	0	0.159692	0.18552	0.0671974	0	0.13747	DDI1-201	PREDICTED: protein DDI1 homolog 2 isoform X2 [Orcinus orca]	XP_012389449.1
Chr06_97714092_97742948		6.20703	2.6339	0.0178294	0.136818	yes	up	0.0136079	0	0.0133353	0.137916	0.242603	0.179193	0.00898106	0.186571	#N/A	#N/A	#N/A
Chr06_98861647_98869027		0.140874	-2.82752	0.000107867	0.0024317	yes	down	0.15649	0.12961	0.100015	0.0290349	0.0713539	0.104529	0.128705	0.068306	#N/A	#N/A	#N/A
Chr07_102162754_102172864	MSTRG.21103,Pig.08859	0.261422	-1.93555	0.035473	0.211797	yes	down	0.0204118	0.0453634	0.0400059	0.0362936	0.0713539	0	0.0352604	0.0358825	#N/A	#N/A	#N/A
Chr07_104353059_104373328		67.1804	6.06997	5.17149e-06	0.000195116	yes	up	0	0	0	0.290349	0.363905	0.24639	0	0.300215	#N/A	#N/A	#N/A
Chr07_110323876_110329872		25.4797	4.67128	0.0413198	0.235122	yes	up	0	0	0	0.108881	0.135572	0.0970628	0	0.113839	#N/A	#N/A	#N/A
Chr07_113801960_113803642	Pig.09320	0.27686	-1.85277	0.00487387	0.0538874	yes	down	0.0340197	0.0712853	0.11335	0.050811	0.128437	0.0447982	0.072885	0.0746821	BICRAL-201	GLTSCR1-like protein [Sus scrofa]	XP_003356680.2
Chr07_121154190_121180103	Pig.17302	42.5071	5.40963	0.000194562	0.00397388	yes	up	0	0	0	0.22502	0.192656	0.149327	0	0.189001	ILRUN-201	uncharacterized protein C6orf106 homolog isoform 2 [Mus musculus]	NP_001038184.1
Chr07_121172550_121180103	Pig.17302	56.7626	5.82687	1.68338e-05	0.000531731	yes	up	0	0	0	0.232279	0.264009	0.261323	0	0.252537	ILRUN-201	uncharacterized protein C6orf106 homolog isoform 2 [Mus musculus]	NP_001038184.1
Chr07_125086601_125090022	Pig.13357	5.6526	2.49891	0.00908415	0.0842222	yes	up	0	0	0.020003	0.108881	0.171249	0.111996	0.00666766	0.130709	MLIP-201	muscular LMNA-interacting protein isoform X3 [Sus scrofa]	XP_020954178.1
Chr07_125113842_125133389	Pig.13357	10.9928	3.45849	0.00745733	0.0735312	yes	up	0	0	0	0.0362936	0.0356769	0.0746637	0	0.0488781	MLIP-201	muscular LMNA-interacting protein isoform X3 [Sus scrofa]	XP_020954178.1
Chr07_12589426_12591520	MSTRG.19290	0.178149	-2.48884	0.000497581	0.00839552	yes	down	0.0544315	0.0907267	0.126685	0.0290349	0.0998955	0.0522646	0.0906145	0.0603983	0	0	XP_013832897.2
Chr07_127317226_127327861	Pig.11473	0.00118862	-9.71649	2.53912e-08	1.83934e-06	yes	down	0.387824	0.226817	0.333383	0	0	0	0.316008	0	Tnxb	tenascin-X isoform X5 [Sus scrofa]	XP_020953995.1
Chr07_127317226_127328596	Pig.11473	0.00277648	-8.49253	1.35526e-10	1.93767e-08	yes	down	0.394628	0.40827	0.600089	0	0.0142708	0	0.467662	0.00475693	Tnxb	tenascin-X isoform X5 [Sus scrofa]	XP_020953995.1
Chr07_128236545_128237928	MSTRG.21817,Pig.11405	0.265233	-1.91467	0.0345112	0.209965	yes	down	0.0544315	0.012961	0.0933472	0.0580697	0.0428123	0.0373319	0.0535799	0.0460713	#N/A	#N/A	#N/A
Chr07_128486884_128504793		0.138767	-2.84926	5.18225e-05	0.00133663	yes	down	0.129275	0.103688	0.180027	0.0725871	0.0642185	0.0671974	0.137663	0.068001	#N/A	#N/A	#N/A
Chr07_20514721_20548703		6.97365	2.80191	0.00962262	0.0879733	yes	up	0	0	0.0266706	0.108881	0.264009	0.24639	0.00889021	0.206427	#N/A	#N/A	#N/A
Chr07_20538732_20548703		3.80947	1.92959	1.07288e-06	5.11312e-05	yes	up	0.0748433	0.103688	0.0800119	1.17591	1.19161	1.28422	0.0861809	1.21725	#N/A	#N/A	#N/A
Chr07_23414882_23455147		0.0233229	-5.42211	0.00489975	0.0538874	yes	down	0.19051	0	0	0	0.0142708	0	0.0635034	0.00475693	#N/A	#N/A	#N/A
Chr07_23444137_23455147	Pig.19585	0.0237466	-5.39614	2.30762e-22	6.26865e-19	yes	down	0.306177	0.2657	0.666766	0.0290349	0.0285416	0.0447982	0.412881	0.0341249	TUBB2B-205	Tubulin beta-2A chain [Fukomys damarensis]	XP_025838410.1
Chr07_27239271_27258403	Pig.18239	0.304644	-1.7148	0.0134236	0.111685	yes	down	0.102059	0.0453634	0.0466736	0.0435523	0.0856247	0.0821301	0.0646987	0.0704357	KLC4-201	kinesin light chain 1 isoform X3 [Sus scrofa]	XP_020937194.1
Chr07_29778850_29779243		0.0092716	-6.75297	2.37363e-05	0.000704697	yes	down	0.0272157	0.0453634	0.0400059	0	0	0	0.0375283	0	#N/A	#N/A	#N/A
Chr07_35015014_35023525	Pig.20280	0.0258614	-5.27305	0.00580599	0.0606614	yes	down	0	0.0194414	0.020003	0	0	0	0.0131481	0	DICER1-203	endoribonuclease Dicer isoform X1 [Sus scrofa]	XP_020953825.1
Chr07_35410729_35446616	MSTRG.19801	3.07534e+09	31.5181	1.08866e-05	0.000371995	yes	up	0	0	0	0	0	6.10749	0	2.03583	0	0	XP_001928879.1
Chr07_35415757_35450947	MSTRG.19801	1.34576e+09	30.3258	1.93708e-10	2.6985e-08	yes	up	0	0	0	0.0435523	0	3.94971	0	1.33109	0	0	XP_001928879.1
Chr07_35448459_35546999		240.668	7.9109	4.32207e-13	1.17409e-10	yes	up	0.0136079	0	0.0133353	5.27708	2.81848	13.0587	0.00898106	7.05142	#N/A	#N/A	#N/A
Chr07_35477234_35532048		386.209	8.59324	0.000155134	0.00327051	yes	up	0	0	0	1.77113	1.44135	1.91139	0	1.70796	#N/A	#N/A	#N/A
Chr07_36723571_36725562		0.089616	-3.4801	1.77561e-20	1.92937e-17	yes	down	0.306177	0.246258	0.480071	0.0871046	0.128437	0.111996	0.344169	0.109179	#N/A	#N/A	#N/A
Chr07_4174021_4175523		49.1496	5.61911	0.000209407	0.00418276	yes	up	0	0	0	0.195985	0.285416	0.179193	0	0.220198	#N/A	#N/A	#N/A
Chr07_4216731_4224186	Pig.15418	61.526	5.94312	0.000270986	0.0052208	yes	up	0	0	0	0.203244	0.37104	0.253857	0	0.276047	SLC17A3-202	sodium-dependent phosphate transport protein 4 isoform X1 [Sus scrofa]	XP_020954076.1
Chr07_4267797_4268205	Pig.15419	558.375	9.12509	2.18887e-13	6.25901e-11	yes	up	0	0	0	1.90178	3.20379	2.39671	0	2.50076	SLC17A1-202	sodium-dependent phosphate transport protein 1 isoform X1 [Sus scrofa]	XP_020953970.1
Chr07_4302776_4309255	Pig.15420	72.664	6.18317	0.000323736	0.00592208	yes	up	0	0	0	0.275831	0.44953	0.253857	0	0.326406	SLC17A4-205	probable small intestine urate exporter isoform X3 [Sus scrofa]	XP_020954070.1
Chr07_47929696_47931535	Pig.08875	0.0722127	-3.7916	0.0399999	0.230456	yes	down	0.0204118	0.0259219	0	0	0.0142708	0	0.0154446	0.00475693	STON2-202	stonin-2 isoform X2 [Sus scrofa]	XP_020955239.1
Chr07_54046395_54049908	Pig.19270	7.27672	2.86329	0.0102654	0.0929532	yes	up	0.0136079	0	0.0133353	0.210503	0.199791	0.238924	0.00898106	0.216406	AREL1-201	apoptosis-resistant E3 ubiquitin protein ligase 1 isoform X1 [Sus scrofa]	XP_003356794.1
Chr07_5561084_5568809	Pig.15440,MSTRG.19214	14.6135	3.86923	0.0227504	0.161784	yes	up	0	0	0	0.0435523	0.0856247	0.0671974	0	0.0654581	#N/A	#N/A	#N/A
Chr07_56816124_56823334	Pig.04349	0.220148	-2.18346	0.0396486	0.228917	yes	down	0.102059	0	0.0533413	0.0362936	0.0570831	0.0149327	0.0518001	0.0361031	SIPA1L1-201	signal-induced proliferation-associated 1-like protein 1 isoform X1 [Sus scrofa]	XP_005656429.1
Chr07_57467134_57478320	Pig.04346	40.863	5.35272	0.00465817	0.0519154	yes	up	0	0	0	0.188727	0.192656	0.16426	0	0.181881	PCNX1-201	pecanex-like protein 1 isoform X1 [Sus scrofa]	XP_020955078.1
Chr07_59218822_59249764	Pig.04323	22.095	4.46565	0.0219344	0.157841	yes	up	0	0	0	0.108881	0.128437	0.059731	0	0.0990162	DCAF5-201	DDB1- and CUL4-associated factor 5 isoform X1 [Sus scrofa]	XP_020955057.1
Chr07_60551900_60558269	Pig.04315	5.89742	2.56008	0.0493191	0.25839	yes	up	0.0340197	0	0	0.217761	0.192656	0.24639	0.0113399	0.218936	RDH11	retinol dehydrogenase 11 isoform X4 [Sus scrofa]	XP_001928802.1
Chr07_61199248_61296019	Pig.04303	2.97514	1.57296	0.00019724	0.0040135	yes	up	0.122471	0.0972072	0.11335	1.10332	1.36999	1.11996	0.111009	1.19776	GPHN-207	gephyrin isoform X1 [Sus scrofa]	XP_020953661.1
Chr07_61242972_61296019	Pig.04303	2.49214	1.31739	8.62131e-05	0.00201028	yes	up	0.122471	0.0972072	0.0933472	0.863787	1.05604	0.895965	0.104342	0.938596	GPHN-207	gephyrin isoform X1 [Sus scrofa]	XP_020953661.1
Chr07_76414473_76415599	MSTRG.20436,Pig.10980	0.358415	-1.4803	0.0169974	0.133257	yes	down	0.0816472	0.0388829	0.100015	0.0943633	0.0642185	0.111996	0.073515	0.0901925	#N/A	#N/A	#N/A
Chr07_80469775_80482983		25.5151	4.67328	0.0450226	0.245497	yes	up	0	0	0	0.0943633	0.135572	0.111996	0	0.113977	#N/A	#N/A	#N/A
Chr07_89693469_89694186	Pig.08443	0.178892	-2.48284	0.000870278	0.0135868	yes	down	0.0476275	0.0583243	0.0733442	0.050811	0.0214062	0.0447982	0.0597654	0.0390051	RALGAPA1-201	ral GTPase-activating protein subunit alpha-1 isoform X7 [Sus scrofa]	XP_020954818.1
Chr07_89701636_89728083	Pig.08443	0.0321634	-4.95843	0.0401851	0.231277	yes	down	0	0.012961	0.020003	0	0	0	0.010988	0	RALGAPA1-201	ral GTPase-activating protein subunit alpha-1 isoform X7 [Sus scrofa]	XP_020954818.1
Chr07_93364322_93374732	Pig.08467	28.1037	4.81269	0.00239856	0.0307945	yes	up	0	0	0	0.181468	0.0856247	0.104529	0	0.123874	ADPGK-201	ADP-dependent glucokinase isoform X1 [Sus scrofa]	XP_020954758.1
Chr07_95086666_95087001	MSTRG.20849,Pig.17563	3.62153	1.8566	0.00776705	0.0760331	yes	up	0.0204118	0	0.0266706	0.137916	0.242603	0.201592	0.0156941	0.194037	#N/A	#N/A	#N/A
Chr07_95716242_95758101		0.0117057	-6.41665	0.00139019	0.020141	yes	down	0.0204118	0.0388829	0.0266706	0	0	0	0.0286551	0	#N/A	#N/A	#N/A
Chr07_95830899_95842021	Pig.17585	0.307625	-1.70076	0.044415	0.243744	yes	down	0.0544315	0.0324024	0.11335	0.0653284	0.0998955	0.0447982	0.066728	0.0700074	PTPN9-201	tyrosine-protein phosphatase non-receptor type 9 isoform X1 [Sus scrofa]	XP_003128529.1
Chr07_96610272_96633342		0.0111825	-6.48261	0.00895823	0.0833391	yes	down	0.0340197	0.0259219	0.0400059	0	0	0	0.0333158	0	#N/A	#N/A	#N/A
Chr07_97375124_97392874	Pig.08771	3.25301	1.70178	0.0238797	0.166332	yes	up	0	0.0453634	0.0400059	0.399229	0.4638	0.223991	0.0284564	0.36234	ETFA-201	electron transfer flavoprotein subunit alpha, mitochondrial [Sus scrofa]	NP_001231332.1
Chr08_103821701_103827202	Pig.01006	0.1578	-2.66383	0.00833564	0.0789216	yes	down	0.0340197	0.0583243	0.0666766	0.0435523	0.0285416	0.0223991	0.0530068	0.0314977	BBS7-201	PREDICTED: Bardet-Biedl syndrome 7 protein isoform X2 [Chinchilla lanigera]	XP_026959428.1
Chr08_115366834_115376634	Pig.00663	29.1504	4.86544	0.00159218	0.0225268	yes	up	0	0	0	0.195985	0.0927601	0.0970628	0	0.128603	ETNPPL-201	ethanolamine-phosphate phospho-lyase isoform X1 [Sus scrofa]	XP_020957345.1
Chr08_115373299_115376634	Pig.00663	77.3986	6.27424	4.61317e-06	0.000176502	yes	up	0	0	0	0.348418	0.363905	0.321054	0	0.344459	ETNPPL-201	ethanolamine-phosphate phospho-lyase isoform X1 [Sus scrofa]	XP_020957345.1
Chr08_115962710_115977373	Pig.00658	3.04092	1.60451	0.00208759	0.0280046	yes	up	0.0612354	0.0583243	0.100015	0.595214	0.813434	0.970628	0.0731915	0.793092	HADH-202	hydroxyacyl-coenzyme A dehydrogenase, mitochondrial precursor [Sus scrofa]	NP_999496.1
Chr08_117659359_117669557	Pig.00650	3.11576	1.63958	0.028908	0.187643	yes	up	0.0204118	0.0194414	0.0466736	0.203244	0.313957	0.425583	0.0288423	0.314261	TBCK-201	TBC domain-containing protein kinase-like protein isoform X1 [Sus scrofa]	XP_020957357.1
Chr08_118267845_118291983	Pig.00645	27.9868	4.80667	0.00694898	0.0697852	yes	up	0	0	0	0.174209	0.0998955	0.0970628	0	0.123722	PPA2-206	inorganic pyrophosphatase 2, mitochondrial isoform X1 [Sus scrofa]	XP_020957372.1
Chr08_118273370_118291983	Pig.00645	10.2705	3.36044	1.17277e-08	9.50998e-07	yes	up	0.0884511	0.0453634	0.0400059	2.61314	1.6126	2.13538	0.0579401	2.12037	PPA2-206	inorganic pyrophosphatase 2, mitochondrial isoform X1 [Sus scrofa]	XP_020957372.1
Chr08_133537058_133555553	Pig.00571	69.9169	6.12757	0.000483678	0.00821195	yes	up	0	0	0	0.246796	0.499477	0.201592	0	0.315955	TRPM2-201	ADP-ribose pyrophosphatase, mitochondrial isoform X1 [Sus scrofa]	XP_003357134.1
Chr08_133538651_133555553	Pig.00571	24.1868	4.59615	0.0172133	0.133942	yes	up	0	0	0	0.108881	0.149843	0.0671974	0	0.10864	TRPM2-201	ADP-ribose pyrophosphatase, mitochondrial isoform X1 [Sus scrofa]	XP_003357134.1
Chr08_133546769_133555553	Pig.00571	20.4045	4.35082	0.00384597	0.0443634	yes	up	0	0.012961	0	0.370194	0.54229	0.231458	0.00432032	0.381314	TRPM2-201	ADP-ribose pyrophosphatase, mitochondrial isoform X1 [Sus scrofa]	XP_003357134.1
Chr08_133608977_133616275	Pig.00570	53.8876	5.75188	0.000126528	0.0027831	yes	up	0	0	0	0.290349	0.249739	0.179193	0	0.23976	HSD17B11-201	estradiol 17-beta-dehydrogenase 11 [Sus scrofa]	XP_020957431.1
Chr08_138698753_138701503	Pig.00533	13.0198	3.70264	0.0131115	0.10993	yes	up	0.0136079	0	0	0.159692	0.178385	0.261323	0.00453596	0.1998	RASGEF1B-201	ras-GEF domain-containing family member 1B isoform X2 [Sus scrofa]	XP_020955964.1
Chr08_139877592_139902897	Pig.00525	2.84842	1.51016	0.00512545	0.0553609	yes	up	0.0408236	0.0777657	0.0933472	0.827493	0.549425	0.8437	0.0706455	0.740206	ANTXR2-205	anthrax toxin receptor 2 [Sus scrofa]	XP_003129419.3
Chr08_15198920_15200822	MSTRG.22096,Pig.04165	51.9751	5.69975	0.000156628	0.00328556	yes	up	0	0	0	0.159692	0.299686	0.238924	0	0.232767	#N/A	#N/A	#N/A
Chr08_16180452_16186784		7.49314	2.90557	0.00179222	0.0247135	yes	up	0.0476275	0.012961	0	0.704095	0.478071	0.425583	0.0201962	0.535917	#N/A	#N/A	#N/A
Chr08_1819603_1844417		42.1768	5.39838	0.00262011	0.0330456	yes	up	0	0	0	0.152433	0.18552	0.223991	0	0.187315	#N/A	#N/A	#N/A
Chr08_20846343_20878523	Pig.16697	2.79293	1.48178	1.99942e-05	0.000606865	yes	up	0.15649	0.110168	0.2267	1.68402	1.59119	1.55301	0.164453	1.60941	DCUN1D4-201	PREDICTED: DCN1-like protein 4 isoform X3 [Ceratotherium simum simum]	XP_004419114.1
Chr08_20859963_20878523	Pig.16697	12.6306	3.65885	3.02549e-05	0.00086513	yes	up	0	0	0.0266706	0.391971	0.456665	0.306121	0.00889021	0.384919	DCUN1D4-201	PREDICTED: DCN1-like protein 4 isoform X3 [Ceratotherium simum simum]	XP_004419114.1
Chr08_21589714_21612832	Pig.16690	0.239527	-2.06174	0.040709	0.233058	yes	down	0.0884511	0.0648048	0.0266706	0.0580697	0.0784893	0.0298655	0.0599755	0.0554748	SLAIN2-201	SLAIN motif-containing protein 2 isoform X1 [Sus scrofa]	XP_005666692.1
Chr08_21865399_21874840	Pig.16689	26.8643	4.74762	0.0291264	0.188364	yes	up	0	0	0	0.0435523	0.18552	0.134395	0	0.121156	TEC-201	tyrosine-protein kinase Tec isoform X1 [Sus scrofa]	XP_020956831.1
Chr08_27211064_27213664	Pig.12465	0.0314413	-4.9912	0.00833811	0.0789216	yes	down	0.0204118	0	0.020003	0	0	0	0.0134716	0	LIMCH1-207	LOW QUALITY PROTEIN: LIM and calponin homology domains-containing protein 1 [Sus scrofa]	XP_020956816.1
Chr08_41107578_41109317	Pig.19832	4.50458	2.17139	0.00938035	0.0861648	yes	up	0	0.0324024	0.020003	0.333901	0.299686	0.291189	0.0174685	0.308259	CCDC149-201	coiled-coil domain-containing protein 149 isoform X3 [Sus scrofa]	XP_020956219.1
Chr08_41107578_41125290	Pig.19832	5.86351	2.55176	1.93175e-09	1.98023e-07	yes	up	0.102059	0.0453634	0.0666766	1.72757	1.19875	1.45594	0.0713663	1.46075	CCDC149-201	coiled-coil domain-containing protein 149 isoform X3 [Sus scrofa]	XP_020956219.1
Chr08_43322535_43386440	Pig.05313	0.0294179	-5.08716	0.0061971	0.0634065	yes	down	0.0136079	0.0194414	0	0	0	0	0.0110164	0	ADGRA3-201	adhesion G protein-coupled receptor A3 isoform X1 [Sus scrofa]	XP_020956719.1
Chr08_49633206_49660217	Pig.05336	4.12949	2.04596	0.000299113	0.00564265	yes	up	0.0476275	0.0259219	0.0400059	0.515369	0.585102	0.552512	0.0378518	0.550994	CPEB2-201	cytoplasmic polyadenylation element-binding protein 2 isoform X1 [Sus scrofa]	XP_020955979.1
Chr08_56193008_56211049	MSTRG.22535	0.123583	-3.01645	0.00354762	0.0417191	yes	down	0.0408236	0.0324024	0.0733442	0.0145174	0.0499477	0	0.0488567	0.0214884	0	0	XP_020956977.1
Chr08_69622240_69626688	Pig.08313,MSTRG.22670	1.91778e+07	24.1929	0.000735311	0.0117498	yes	up	0	0	0	0.653284	0.435259	0	0	0.362848	#N/A	#N/A	#N/A
Chr08_70736598_70743519	Pig.08320	0.295287	-1.75981	8.53845e-17	4.63894e-14	yes	down	0.489883	0.382348	0.746778	0.544404	0.627914	0.51518	0.53967	0.562499	ANKRD17-201	ankyrin repeat domain-containing protein 17 isoform X1 [Sus scrofa]	XP_020956038.1
Chr08_70741883_70743519	Pig.08320	0.0771142	-3.69686	1.10561e-06	5.22331e-05	yes	down	0.0748433	0.0842462	0.0666766	0.0217761	0.0214062	0.0223991	0.0752554	0.0218605	ANKRD17-201	ankyrin repeat domain-containing protein 17 isoform X1 [Sus scrofa]	XP_020956038.1
Chr08_71012313_71017161	MSTRG.22686,Pig.08321	166.164	7.37647	3.47349e-09	3.19855e-07	yes	up	0	0	0	0.704095	0.920465	0.604776	0	0.743112	#N/A	#N/A	#N/A
Chr08_71012313_71018900	MSTRG.22686,Pig.08321	65.6391	6.03648	1.0696e-05	0.000370135	yes	up	0	0	0	0.246796	0.413853	0.223991	0	0.29488	#N/A	#N/A	#N/A
Chr08_71012313_71020074	MSTRG.22686,Pig.08321	170.204	7.41112	4.65022e-09	4.07494e-07	yes	up	0	0	0	0.580697	1.00609	0.701839	0	0.762875	#N/A	#N/A	#N/A
Chr08_71021523_71023766	MSTRG.22686	155.215	7.27812	6.92738e-09	5.79023e-07	yes	up	0	0	0	0.493593	1.09171	0.51518	0	0.700162	0	0	NP_001005208.1
Chr08_71078825_71082407	Pig.08323	13.8654	3.79342	0.0409988	0.233977	yes	up	0	0	0	0.0580697	0.0998955	0.0298655	0	0.0626102	AFM-203	afamin isoform X1 [Sus scrofa]	XP_003357020.1
Chr08_71078825_71090128		25.6571	4.68129	0.00177627	0.0246186	yes	up	0	0	0	0.0943633	0.121302	0.126928	0	0.114198	#N/A	#N/A	#N/A
Chr08_71080336_71084796	Pig.08323	243.118	7.92552	1.02359e-10	1.50301e-08	yes	up	0	0	0	1.20495	1.23442	0.813835	0	1.0844	AFM-203	afamin isoform X1 [Sus scrofa]	XP_003357020.1
Chr08_71418686_71512101		0.264811	-1.91697	0.0276224	0.183015	yes	down	0.0884511	0	0.0400059	0.050811	0.0356769	0.0223991	0.042819	0.0362957	#N/A	#N/A	#N/A
Chr08_71559017_71589737	Pig.08332	47.2695	5.56284	0.000183053	0.00375294	yes	up	0	0	0	0.188727	0.18552	0.253857	0	0.209368	MTHFD2-201	PREDICTED: probable bifunctional methylenetetrahydrofolate dehydrogenase/cyclohydrolase 2 [Bos mutus]	XP_005891322.1
Chr08_71559017_71632364	Pig.08332	18.0136	4.17102	0.0022518	0.0293382	yes	up	0	0	0	0.123398	0.0713539	0.0447982	0	0.0798501	MTHFD2-201	PREDICTED: probable bifunctional methylenetetrahydrofolate dehydrogenase/cyclohydrolase 2 [Bos mutus]	XP_005891322.1
Chr08_74627540_74632046	Pig.08363	2.75535	1.46224	0.00801363	0.0771951	yes	up	0.0476275	0.0194414	0.0333383	0.377453	0.335363	0.253857	0.0334691	0.322224	CNOT6L-204	CCR4-NOT transcription complex subunit 6-like isoform X1 [Sus scrofa]	XP_020956265.1
Chr08_77652137_77679142	Pig.19602	0.0651833	-3.93935	0.0447294	0.244948	yes	down	0.0136079	0.0259219	0.0133353	0	0.0142708	0	0.0176217	0.00475693	ARFIP1-201	arfaptin-1 isoform X2 [Sus scrofa]	XP_020956020.1
Chr08_84142040_84143093	Pig.01079	0.0458951	-4.44552	0.0365939	0.216574	yes	down	0.0204118	0.0194414	0.0466736	0	0.0142708	0	0.0288423	0.00475693	ZNF827-201	zinc finger protein 827 isoform X1 [Sus scrofa]	XP_020957194.1
Chr08_84469002_84469579		2.25319	1.17197	0.00288019	0.0359726	yes	up	0.108863	0.0842462	0.233368	1.16139	1.1488	1.01543	0.142159	1.10854	#N/A	#N/A	#N/A
Chr08_85796271_85798673	Pig.01064	0.0119532	-6.38646	0.013487	0.112041	yes	down	0.0204118	0.0259219	0.0466736	0	0	0	0.0310024	0	GAB1-202	LOW QUALITY PROTEIN: GRB2-associated-binding protein 1 [Sus scrofa]	XP_003129225.4
Chr08_87802538_87815783	Pig.01059	0.031427	-4.99185	3.60569e-05	0.000984408	yes	down	0.0816472	0.0777657	0.0800119	0	0.0285416	0	0.0798083	0.00951385	RNF150-202	LOW QUALITY PROTEIN: RING finger protein 150 [Sus scrofa]	XP_020957213.1
Chr08_88702038_88703585	Pig.01052	0.0301882	-5.04987	0.0117063	0.101436	yes	down	0.0476275	0.0518438	0.0266706	0	0	0.0149327	0.0420473	0.00497758	MAML3-201	LOW QUALITY PROTEIN: mastermind-like protein 3 [Sus scrofa]	XP_020956336.1
Chr08_89359872_89392735		10.7446	3.42554	0.000338907	0.00611722	yes	up	0	0	0.020003	0.28309	0.264009	0.194126	0.00666766	0.247075	#N/A	#N/A	#N/A
Chr08_98242246_98249632		65.3038	6.0291	0.0065579	0.0661021	yes	up	0	0	0	0.28309	0.264009	0.321054	0	0.289384	#N/A	#N/A	#N/A
Chr08_98373397_98395063	Pig.01030	14.1748	3.82526	0.0142636	0.117415	yes	up	0	0	0	0.0725871	0.0642185	0.0522646	0	0.0630234	LARP1B-201	la-related protein 1B isoform X1 [Sus scrofa]	XP_013834346.2
Chr08_98394940_98414415	Pig.01030	23.4246	4.54995	0.00800764	0.0771951	yes	up	0	0	0	0.0725871	0.178385	0.0671974	0	0.106056	LARP1B-201	la-related protein 1B isoform X1 [Sus scrofa]	XP_013834346.2
Chr08_98428798_98446659	Pig.01030	14.4571	3.85371	0.00652069	0.0658755	yes	up	0	0	0	0.0725871	0.0998955	0.0223991	0	0.0649606	LARP1B-201	la-related protein 1B isoform X1 [Sus scrofa]	XP_013834346.2
Chr09_10030986_10046260		15.377	3.94271	5.32137e-08	3.56926e-06	yes	up	0.0204118	0.0648048	0	1.66225	2.21911	1.70233	0.0284055	1.86123	#N/A	#N/A	#N/A
Chr09_105808546_105819962	Pig.08232	75.9614	6.24719	1.1203e-05	0.000380413	yes	up	0	0	0	0.319383	0.399582	0.298655	0	0.339207	BCO2-203	beta,beta-carotene 9',10'-oxygenase isoform X1 [Sus scrofa]	XP_003129903.2
Chr09_109132367_109141681	Pig.11684	2.94604	1.55878	0.0347245	0.210638	yes	up	0.0408236	0.0194414	0.0266706	0.232279	0.385311	0.291189	0.0289786	0.302926	PICALM-207	phosphatidylinositol-binding clathrin assembly protein isoform X6 [Sus scrofa]	XP_020957732.1
Chr09_109155145_109193076	Pig.11684	0.368821	-1.43901	0.0364086	0.215712	yes	down	0.0612354	0.0388829	0.0666766	0.0798458	0.0856247	0.0522646	0.0555983	0.0725784	PICALM-207	phosphatidylinositol-binding clathrin assembly protein isoform X6 [Sus scrofa]	XP_020957732.1
Chr09_109163680_109193076	Pig.11684	0.436916	-1.19457	0.0173312	0.134303	yes	down	0.129275	0.0712853	0.160024	0.152433	0.256874	0.141861	0.120195	0.183723	PICALM-207	phosphatidylinositol-binding clathrin assembly protein isoform X6 [Sus scrofa]	XP_020957732.1
Chr09_109165747_109193076	Pig.11684	0.485662	-1.04197	0.012177	0.104846	yes	down	0.204118	0.103688	0.166691	0.377453	0.228332	0.201592	0.158166	0.269126	PICALM-207	phosphatidylinositol-binding clathrin assembly protein isoform X6 [Sus scrofa]	XP_020957732.1
Chr09_110087896_110112039	Pig.11675	0.260108	-1.94282	0.00920023	0.0848639	yes	down	0.183706	0.110168	0.160024	0.188727	0.0784893	0.149327	0.151299	0.138848	TMEM135-201	transmembrane protein 135 isoform X1 [Sus scrofa]	XP_020918270.1
Chr09_110087896_110158133	Pig.11675	0.0673808	-3.89152	1.97233e-05	0.000603025	yes	down	0.0544315	0.0972072	0.140021	0.0290349	0.0214062	0.0223991	0.0972198	0.02428	TMEM135-201	transmembrane protein 135 isoform X1 [Sus scrofa]	XP_020918270.1
Chr09_116505101_116511736	MSTRG.25472,Pig.08139	0.0211476	-5.56336	2.58133e-07	1.44581e-05	yes	down	0.0952551	0.123129	0.0400059	0.0217761	0	0	0.08613	0.00725871	#N/A	#N/A	#N/A
Chr09_116510800_116511736	MSTRG.25472,Pig.08139	0.0144132	-6.11647	5.53329e-05	0.00141138	yes	down	0.0476275	0	0.0400059	0	0	0	0.0292112	0	#N/A	#N/A	#N/A
Chr09_116529537_116538460	MSTRG.25472	0.00306374	-8.35049	4.73791e-10	5.72023e-08	yes	down	0.102059	0.0972072	0.166691	0	0	0	0.121986	0	0	0	XP_005667294.2
Chr09_117475548_117490571	Pig.08149	0.0963413	-3.3757	0.0443081	0.243744	yes	down	0.0680393	0.0518438	0.0466736	0.0435523	0	0.0149327	0.0555189	0.019495	MTMR2-201	myotubularin-related protein 2 isoform X1 [Sus scrofa]	XP_003129845.1
Chr09_117715212_117716726	Pig.08150	0.072757	-3.78077	2.11058e-15	9.55564e-13	yes	down	0.312981	0.155531	0.20003	0.0362936	0.0998955	0.0373319	0.222847	0.0578403	MAML2-201	mastermind-like protein 2 isoform X2 [Sus scrofa]	XP_020957993.1
Chr09_125072334_125077449	Pig.12884	2.04726	1.03369	0.0125888	0.1066	yes	up	0.0544315	0.0453634	0.153356	0.689578	0.627914	0.470381	0.0843836	0.595958	FCHSD2-201	F-BAR and double SH3 domains protein 2 isoform X7 [Sus scrofa]	XP_020957951.1
Chr09_126761252_126807052	Pig.12861	2.1855	1.12796	0.0203318	0.150085	yes	up	0.0816472	0.0712853	0.0733442	0.73313	0.328228	0.716772	0.0754256	0.59271	RNF169-201	E3 ubiquitin-protein ligase RNF169 [Sus scrofa]	XP_020918163.1
Chr09_126800519_126807052	Pig.12861	4.18617	2.06563	0.0352399	0.211053	yes	up	0.0272157	0	0.0133353	0.210503	0.178385	0.171727	0.013517	0.186871	RNF169-201	E3 ubiquitin-protein ligase RNF169 [Sus scrofa]	XP_020918163.1
Chr09_129838326_129855475	Pig.17461	8.72611	3.12534	0.0413341	0.235122	yes	up	0	0	0	0.0290349	0.0428123	0.0447982	0	0.0388818	PPFIBP2-203	liprin-beta-2 isoform X8 [Sus scrofa]	XP_020917946.1
Chr09_131363257_131386887		54.1572	5.75908	2.58745e-05	0.000755786	yes	up	0	0	0	0.246796	0.292551	0.186659	0	0.242002	#N/A	#N/A	#N/A
Chr09_132854062_132873591	Pig.10255	2.70303	1.43458	0.00740644	0.0732954	yes	up	0.0544315	0.0324024	0.0266706	0.377453	0.392446	0.32852	0.0378348	0.36614	UVRAG-201	UV radiation resistance-associated gene protein isoform X2 [Sus scrofa]	XP_020918186.1
Chr09_133375350_133400084	Pig.10251	0.0802818	-3.63878	0.0101476	0.09204	yes	down	0.0340197	0.0324024	0.0533413	0	0.0356769	0	0.0399211	0.0118923	EMSY-205	BRCA2-interacting transcriptional repressor EMSY isoform X1 [Sus scrofa]	XP_013834604.1
Chr09_133416931_133431162	Pig.10251	0.0385247	-4.69807	0.0465847	0.249491	yes	down	0	0.012961	0.0133353	0	0	0	0.00876542	0	EMSY-205	BRCA2-interacting transcriptional repressor EMSY isoform X1 [Sus scrofa]	XP_013834604.1
Chr09_133753630_133848763	Pig.10246	0.060627	-4.0439	0.0121548	0.104821	yes	down	0.0612354	0	0.0600089	0	0	0.0223991	0.0404148	0.00746637	ACER3-201	alkaline ceramidase 3 isoform X1 [Sus scrofa]	XP_020918213.1
Chr09_16530586_16537017	Pig.04694	10.0009	3.32205	0.0491502	0.257754	yes	up	0	0	0	0.0290349	0.0927601	0.0149327	0	0.0455759	CEP350	LOW QUALITY PROTEIN: centrosome-associated protein 350 [Sus scrofa]	XP_020919409.1
Chr09_17271933_17273563	Pig.04684	16.1994	4.01787	0.0256055	0.174767	yes	up	0	0	0	0.0435523	0.0998955	0.0746637	0	0.0727038	ABL2-205	Abelson tyrosine-protein kinase 2 isoform X5 [Sus scrofa]	XP_003482779.2
Chr09_18435140_18439998	Pig.04675	26.9248	4.75086	0.0173385	0.134303	yes	up	0	0	0	0.16695	0.0927601	0.0970628	0	0.118924	SEC16B-202	protein transport protein Sec16B isoform X1 [Sus scrofa]	XP_020919350.1
Chr09_23700528_23704503	Pig.04643	0.0985507	-3.34299	6.22145e-05	0.00156275	yes	down	0.292569	0.149051	0.11335	0.130657	0.0214062	0.0447982	0.18499	0.0656204	DNM3-201	dynamin-3 isoform X4 [Sus scrofa]	XP_020919297.1
Chr09_2529470_2539616	Pig.14419	18.115	4.17911	0.01168	0.101369	yes	up	0	0	0	0.0798458	0.0713539	0.0895965	0	0.0802654	COBL	LOW QUALITY PROTEIN: protein cordon-bleu [Sus scrofa]	XP_020919590.1
Chr09_33373916_33420108	Pig.00297	2.74508	1.45685	0.0289629	0.187775	yes	up	0.0748433	0.0324024	0.0533413	0.45004	0.563696	0.530112	0.053529	0.514616	SRPK2-201	SRSF protein kinase 2 isoform X2 [Sus scrofa]	XP_020958237.1
Chr09_33510001_33515020	Pig.00298	0.328406	-1.60645	0.00317481	0.0388486	yes	down	0.0816472	0.0712853	0.180027	0.108881	0.114166	0.156794	0.110986	0.126614	KMT2E-201	histone-lysine N-methyltransferase 2E isoform X1 [Sus scrofa]	XP_013835277.2
Chr09_33536908_33540037		0.254771	-1.97273	0.0100251	0.0910805	yes	down	0.0340197	0.0453634	0.0533413	0.0653284	0.0285416	0.0298655	0.0442414	0.0412452	#N/A	#N/A	#N/A
Chr09_40198606_40202893	Pig.00327	8.41384	3.07276	0.0459398	0.24712	yes	up	0	0	0	0.0725871	0	0.0373319	0	0.0366397	CACNA2D1-201	voltage-dependent calcium channel subunit alpha-2/delta-1 isoform X5 [Sus scrofa]	XP_013835239.1
Chr09_45493560_45496209	Pig.00341	84.1219	6.39441	1.65106e-06	7.2832e-05	yes	up	0	0	0	0.297607	0.513748	0.321054	0	0.37747	ABCB1	LOW QUALITY PROTEIN: multidrug resistance protein 1-like [Sus scrofa]	XP_020919622.1
Chr09_46149144_46149865	Pig.00347	13.1049	3.71204	0.0162083	0.128742	yes	up	0	0	0	0.0362936	0.0642185	0.0746637	0	0.0583919	TRA2A-201	PREDICTED: transformer-2 protein homolog alpha isoform X3 [Hipposideros armiger]	NP_932770.2
Chr09_47585747_47596458	Pig.00356	22.1424	4.46874	0.00460159	0.0515473	yes	up	0	0	0	0.123398	0.121302	0.0522646	0	0.0989881	RAPGEF5-202	rap guanine nucleotide exchange factor 5 isoform X1 [Sus scrofa]	XP_013845029.1
Chr09_49973631_49975568		0.287845	-1.79663	0.0494019	0.258571	yes	down	0.0136079	0.0648048	0.0333383	0.0362936	0.0356769	0.059731	0.0372503	0.0439005	#N/A	#N/A	#N/A
Chr09_53957225_53971274	Pig.00384	42.9701	5.42526	0.00554178	0.0588056	yes	up	0	0	0	0.152433	0.221197	0.201592	0	0.191741	AGMO-201	alkylglycerol monooxygenase isoform X1 [Sus scrofa]	XP_003130227.3
Chr09_53971179_54037551	Pig.00384	27.9827	4.80646	0.00376669	0.0436526	yes	up	0	0	0	0.152433	0.164114	0.059731	0	0.125426	AGMO-201	alkylglycerol monooxygenase isoform X1 [Sus scrofa]	XP_003130227.3
Chr09_54009268_54037551	Pig.00384	35.4323	5.14699	0.00517127	0.0556945	yes	up	0	0	0	0.108881	0.178385	0.186659	0	0.157975	AGMO-201	alkylglycerol monooxygenase isoform X1 [Sus scrofa]	XP_003130227.3
Chr09_60430146_60496454	Pig.00397	14.4786	3.85585	0.0143158	0.117667	yes	up	0	0	0	0.050811	0.0356769	0.104529	0	0.0636724	GLCCI1-202	glucocorticoid-induced transcript 1 protein isoform X1 [Sus scrofa]	XP_020958076.1
Chr09_66642968_66649228	Pig.00442	22.5607	4.49574	0.0331506	0.205602	yes	up	0	0	0	0.0943633	0.142708	0.0671974	0	0.101423	CYP51A1-202	lanosterol 14-alpha demethylase [Sus scrofa]	NP_999597.1
Chr09_71065077_71065262		27.322	4.77199	0.042837	0.239191	yes	up	0	0	0	0.152433	0.114166	0.0970628	0	0.121221	#N/A	#N/A	#N/A
Chr09_73629528_73630300	Pig.00508	0.355455	-1.49226	0.0280342	0.183949	yes	down	0.0544315	0.0583243	0.0466736	0.0290349	0.0784893	0.104529	0.0531431	0.0706845	PIK3C2B-201	phosphatidylinositol 4-phosphate 3-kinase C2 domain-containing subunit beta isoform X1 [Sus scrofa]	XP_003357437.4
Chr09_74176738_74188106	Pig.00518	0.0633491	-3.98053	0.0328049	0.203923	yes	down	0.0136079	0.0194414	0.0266706	0	0.0142708	0	0.0199066	0.00475693	ZC3H11A	zinc finger CCCH domain-containing protein 11A [Sus scrofa]	XP_003357427.1
Chr09_8107518_8113176	Pig.14368	4.11937	2.04242	0.015692	0.126103	yes	up	0	0.0194414	0.020003	0.239538	0.206926	0.156794	0.0131481	0.201086	LPGAT1-201	acyl-CoA:lysophosphatidylglycerol acyltransferase 1 [Sus scrofa]	XP_003357646.2
Chr09_8107518_8117610	Pig.14368	6.40619	2.67947	5.35086e-12	1.26397e-09	yes	up	0.102059	0.0777657	0.160024	2.14858	3.03968	2.49377	0.113283	2.56067	LPGAT1-201	acyl-CoA:lysophosphatidylglycerol acyltransferase 1 [Sus scrofa]	XP_003357646.2
Chr09_81747706_81748778		3.42882	1.77771	0.00938884	0.0861648	yes	up	0.0408236	0.012961	0.0266706	0.326642	0.256874	0.365852	0.0268184	0.316456	#N/A	#N/A	#N/A
Chr09_81875672_81886647	Pig.12165,MSTRG.24816	19.7283	4.3022	0.0256965	0.175168	yes	up	0	0	0	0.130657	0.0713539	0.059731	0	0.0872472	#N/A	#N/A	#N/A
Chr09_9089267_9089937	Pig.14355	0.11838	-3.0785	0.0419332	0.236086	yes	down	0.0408236	0.0194414	0.146688	0.0362936	0.0428123	0	0.0689845	0.0263686	VASH2-201	vasohibin-2 isoform X1 [Sus scrofa]	EAW93371.1
Chr09_90951665_90967965		3.06739	1.61701	0.00840042	0.0792352	yes	up	0.0612354	0.0259219	0.0866795	0.609732	0.613643	0.589843	0.0579456	0.604406	#N/A	#N/A	#N/A
Chr09_92664524_92666467	MSTRG.25007,Pig.06854	0.230312	-2.11834	5.41309e-11	9.8031e-09	yes	down	0.319785	0.233297	0.606757	0.297607	0.321093	0.306121	0.386613	0.308274	#N/A	#N/A	#N/A
Chr09_93534322_93535906	Pig.12718,MSTRG.25053	0.0320893	-4.96176	0.0315677	0.198914	yes	down	0.0204118	0	0.020003	0	0	0	0.0134716	0	#N/A	#N/A	#N/A
Chr09_93599512_93601350	Pig.12721	0.328682	-1.60523	0.0214554	0.155631	yes	down	0.0816472	0.0388829	0.0400059	0.0580697	0.0784893	0.0522646	0.053512	0.0629412	KMT2A	histone-lysine N-methyltransferase 2A isoform X1 [Sus scrofa]	XP_020918570.1
Chr09_95075653_95110016	Pig.12746	20.7023	4.37172	0.00824695	0.0788855	yes	up	0	0	0	0.0871046	0.0998955	0.0895965	0	0.0921988	SIK3-205	PREDICTED: serine/threonine-protein kinase SIK3 isoform X4 [Pongo abelii]	XP_029062906.1
Chr09_97772074_97773419	MSTRG.25157	0.0827746	-3.59467	0.0456888	0.246728	yes	down	0.0612354	0.0972072	0.0400059	0.0290349	0	0.0373319	0.0661495	0.0221222	0	0	XP_020918527.1
Chr10_12010782_12017302	Pig.12142	81.6252	6.35094	5.77853e-06	0.000216516	yes	up	0	0	0	0.326642	0.349634	0.41065	0	0.362309	NR5A2-201	nuclear receptor subfamily 5 group A member 2 isoform X1 [Sus scrofa]	XP_020919660.1
Chr10_12165178_12166260		62.4684	5.96506	0.0160784	0.128099	yes	up	0	0	0	0.203244	0.27828	0.35092	0	0.277481	#N/A	#N/A	#N/A
Chr10_14474_14833		7.16513	2.84099	0.0455202	0.246728	yes	up	0	0	0	0.0290349	0.0214062	0.0447982	0	0.0317464	#N/A	#N/A	#N/A
Chr10_15720421_15721558	Pig.10840	32.1502	5.00675	0.0315962	0.198914	yes	up	0	0	0	0.0943633	0.164114	0.171727	0	0.143401	RGS7-201	regulator of G-protein signaling 7 isoform X1 [Sus scrofa]	XP_020920030.1
Chr10_16177546_16182624	Pig.10842,MSTRG.26263	14.681	3.87588	0.0421354	0.236734	yes	up	0	0	0	0.0725871	0.0713539	0.0522646	0	0.0654019	#N/A	#N/A	#N/A
Chr10_16191597_16193464	Pig.10842,MSTRG.26263	22.595	4.49793	0.0257847	0.175254	yes	up	0	0	0	0.137916	0.0713539	0.0895965	0	0.099622	#N/A	#N/A	#N/A
Chr10_20827319_20840251	Pig.11166	27.9818	4.80641	0.00348795	0.0411957	yes	up	0	0	0	0.123398	0.171249	0.0821301	0	0.125593	MARC1	mitochondrial amidoxime-reducing component 1 isoform X1 [Sus scrofa]	XP_020919996.1
Chr10_20961970_20996575	Pig.11163	0.0311672	-5.00383	0.00724133	0.0724533	yes	down	0.0748433	0.0194414	0.0466736	0.0145174	0	0	0.0469861	0.00483914	MARK1-201	serine/threonine-protein kinase MARK1 isoform X1 [Sus scrofa]	XP_020919987.1
Chr10_20969083_20996575	Pig.11163	0.0438058	-4.51274	1.07701e-05	0.00037034	yes	down	0.0816472	0.0259219	0.0933472	0.0145174	0	0.0149327	0.0669721	0.00981672	MARK1-201	serine/threonine-protein kinase MARK1 isoform X1 [Sus scrofa]	XP_020919987.1
Chr10_22060466_22087742	Pig.11156	27.6073	4.78698	0.0370404	0.218265	yes	up	0	0	0	0.123398	0.149843	0.0970628	0	0.123435	LYPLAL1-204	lysophospholipase-like protein 1 isoform X3 [Sus scrofa]	XP_020919962.1
Chr10_22670141_22673756	Pig.11154	0.0174467	-5.8409	6.93073e-10	7.84472e-08	yes	down	0.176902	0.110168	0.173359	0	0.0285416	0	0.153476	0.00951385	TGFB2-201	transforming growth factor beta-2 isoform X1 [Sus scrofa]	XP_020919953.1
Chr10_22671725_22673756	Pig.11154	0.0161897	-5.94878	0.00363101	0.0424242	yes	down	0.0408236	0	0.0400059	0	0	0	0.0269432	0	TGFB2-201	transforming growth factor beta-2 isoform X1 [Sus scrofa]	XP_020919953.1
Chr10_33762189_33772386	Pig.17816	59.8564	5.90343	1.42012e-05	0.000466704	yes	up	0	0	0	0.239538	0.299686	0.261323	0	0.266849	CFH	complement factor H precursor [Sus scrofa]	NP_999446.1
Chr10_33762189_33787163	Pig.17816	20.4625	4.35491	0.0209884	0.153266	yes	up	0	0	0	0.123398	0.0570831	0.0895965	0	0.0900259	CFH	complement factor H precursor [Sus scrofa]	NP_999446.1
Chr10_33786987_33844887		493335	18.9122	0.00832629	0.0789216	yes	up	0	0	0	0	0.428123	0	0	0.142708	#N/A	#N/A	#N/A
Chr10_33794237_33815106	MSTRG.26482,Pig.17816	13.4686	3.75153	0.0176098	0.135371	yes	up	0	0	0.0133353	0.159692	0.313957	0.134395	0.0044451	0.202681	#N/A	#N/A	#N/A
Chr10_34281541_34315347		3.9453	1.98014	7.17035e-17	4.34472e-14	yes	up	0.455864	0.27218	0.433398	5.50936	5.24451	5.42059	0.387147	5.39149	#N/A	#N/A	#N/A
Chr10_34996942_35005772	Pig.14086	3.32565	1.73364	0.0348477	0.210638	yes	up	0	0.012961	0.0266706	0.123398	0.192656	0.156794	0.0132105	0.157616	WDR37-201	WD repeat-containing protein 37 isoform X1 [Sus scrofa]	XP_020919692.1
Chr10_37919194_37950701		4.07919e+08	28.6037	6.55412e-05	0.00162596	yes	up	0	0	0	0	1.75531	1.20955	0	0.988286	#N/A	#N/A	#N/A
Chr10_39638817_39683690	Pig.17648	17.9428	4.16533	0.0425562	0.238113	yes	up	0	0	0	0.0653284	0.0927601	0.0821301	0	0.0800729	SFMBT2-202	scm-like with four MBT domains protein 2 [Sus scrofa]	XP_020920665.1
Chr10_39752709_39756855	Pig.17648	59.9987	5.90686	0.000105669	0.00240208	yes	up	0	0	0	0.326642	0.264009	0.209058	0	0.26657	SFMBT2-202	scm-like with four MBT domains protein 2 [Sus scrofa]	XP_020920665.1
Chr10_39752709_39765278		24.0733	4.58936	2.56756e-14	8.20563e-12	yes	up	0.0136079	0.0194414	0.0266706	1.40819	1.9551	1.777	0.0199066	1.71343	#N/A	#N/A	#N/A
Chr10_44021920_44023990	Pig.20499	34.8515	5.12315	0.00145369	0.0209494	yes	up	0	0	0	0.0871046	0.242603	0.141861	0	0.15719	DHTKD1-201	probable 2-oxoglutarate dehydrogenase E1 component DHKTD1, mitochondrial isoform X1 [Sus scrofa]	XP_020920651.1
Chr10_44106330_44112944	Pig.20502,MSTRG.26646	8.91893	3.15687	0.00148564	0.0213531	yes	up	0.0272157	0	0	0.152433	0.392446	0.283722	0.00907191	0.276201	#N/A	#N/A	#N/A
Chr10_46687555_46712915	Pig.09685	39.8009	5.31473	0.000310742	0.00578172	yes	up	0	0	0	0.210503	0.178385	0.141861	0	0.176916	PARD3-201	LOW QUALITY PROTEIN: partitioning defective 3 homolog [Sus scrofa]	XP_020919890.1
Chr10_46803012_46813745	Pig.09685	3.40354	1.76704	0.000213084	0.00422513	yes	up	0.0748433	0.012961	0.133353	0.747647	1.02036	0.731705	0.0737191	0.833238	PARD3-201	LOW QUALITY PROTEIN: partitioning defective 3 homolog [Sus scrofa]	XP_020919890.1
Chr10_50761217_50794597	Pig.09670	2.72186	1.4446	0.00047718	0.00812701	yes	up	0.102059	0.0907267	0.186694	1.23398	1.18447	1.21702	0.126493	1.21182	MLLT10-201	protein AF-10 isoform X3 [Sus scrofa]	XP_020920583.1
Chr10_53378097_53378498	Pig.16905	0.208331	-2.26305	0.0204323	0.150622	yes	down	0.115667	0.0583243	0.160024	0.0943633	0.0428123	0.0970628	0.111338	0.0780795	ARHGAP21-201	LOW QUALITY PROTEIN: rho GTPase-activating protein 21 [Sus scrofa]	XP_020920575.1
Chr10_55203503_55208964	Pig.16891	4.0702	2.0251	0.00107594	0.0160593	yes	up	0.0612354	0.012961	0.0733442	0.798458	0.535154	0.657041	0.0491802	0.663551	ACBD5-201	acyl-CoA-binding domain-containing protein 5 isoform X4 [Sus scrofa]	XP_020920544.1
Chr10_57501680_57515799	Pig.13792,MSTRG.26836	8.28705	3.05086	0.00883561	0.0824809	yes	up	0	0.0194414	0	0.246796	0.256874	0.171727	0.00648048	0.225132	#N/A	#N/A	#N/A
Chr10_62251864_62267949	Pig.05023	0.49874	-1.00364	0.00017693	0.00365498	yes	down	0.63957	0.298102	0.373389	0.696836	0.934736	0.694373	0.43702	0.775315	ZEB1-201	LOW QUALITY PROTEIN: zinc finger E-box-binding homeobox 1 [Sus scrofa]	XP_020919855.1
Chr10_70511852_70515816	Pig.05052	0.0238206	-5.39164	0.0403363	0.231656	yes	down	0.0136079	0.012961	0.020003	0	0	0	0.0155239	0	ACO1-201	cytoplasmic aconitate hydratase [Sus scrofa]	XP_003357777.1
Chr10_71425687_71427450	MSTRG.27019	0.0530743	-4.23584	0.00168726	0.023687	yes	down	0.0340197	0.0259219	0.0533413	0	0.0214062	0	0.0377609	0.00713539	0	0	NP_001106909.1
Chr10_71673526_71683181	MSTRG.27025,Pig.05070	0.411417	-1.28133	0.011562	0.100913	yes	down	0.149687	0.0648048	0.206697	0.116139	0.171249	0.298655	0.140396	0.195348	#N/A	#N/A	#N/A
Chr10_71673526_71700050	MSTRG.27025	0.173671	-2.52557	9.81313e-10	1.06629e-07	yes	down	0.217726	0.162012	0.286709	0.145174	0.107031	0.156794	0.222149	0.136333	0	0	XP_020920352.1
Chr10_72830962_72838696	Pig.05090	0.0120698	-6.37246	0.0266566	0.178797	yes	down	0.0408236	0.0388829	0	0	0	0	0.0265688	0	FRMD3-201	FERM domain-containing protein 3 isoform X4 [Sus scrofa]	XP_020920322.1
Chr10_73318405_73340619		11.0083	3.46052	0.0448521	0.245152	yes	up	0	0	0	0.0653284	0.0356769	0.0447982	0	0.0486012	#N/A	#N/A	#N/A
Chr10_75688817_75690713	Pig.09939	3.49618	1.80578	0.0470633	0.251084	yes	up	0	0	0.0333383	0.0943633	0.171249	0.126928	0.0111128	0.130847	NAA35	PREDICTED: N-alpha-acetyltransferase 35, NatC auxiliary subunit isoform X1 [Miniopterus natalensis]	XP_016078359.1
Chr10_75878857_75880339	MSTRG.27145,Pig.09943	91.725	6.51924	0.000210692	0.00419301	yes	up	0	0	0	0.471816	0.513748	0.24639	0	0.410652	#N/A	#N/A	#N/A
Chr10_75879157_75880339	MSTRG.27145,Pig.09943	3.97996	1.99275	1.40982e-08	1.12641e-06	yes	up	0.19051	0.123129	0.273374	2.83816	2.59728	2.69536	0.195671	2.71027	#N/A	#N/A	#N/A
Chr10_75910144_75913576	MSTRG.27145,Pig.09943	11.4258	3.51422	0.0150677	0.122002	yes	up	0.0136079	0	0	0.159692	0.206926	0.16426	0.00453596	0.176959	#N/A	#N/A	#N/A
Chr10_79176813_79195182	Pig.09955	2.61869	1.38885	0.0352527	0.211053	yes	up	0.0272157	0.012961	0.0466736	0.210503	0.328228	0.24639	0.0289501	0.261707	SLC35D2	UDP-N-acetylglucosamine/UDP-glucose/GDP-mannose transporter isoform X1 [Sus scrofa]	XP_020919655.1
Chr10_79176813_79205096	Pig.09955	17.1952	4.10393	0.0252927	0.173504	yes	up	0	0	0	0.130657	0.0356769	0.059731	0	0.0753549	SLC35D2	UDP-N-acetylglucosamine/UDP-glucose/GDP-mannose transporter isoform X1 [Sus scrofa]	XP_020919655.1
Chr10_79750648_79751650	Pig.09964,MSTRG.27211	12.993	3.69966	1.82787e-08	1.39871e-06	yes	up	0.0340197	0	0.020003	0.7912	0.956142	0.642108	0.0180075	0.796483	#N/A	#N/A	#N/A
Chr11_1141966_1143058	Pig.20214	0.00239519	-8.70565	2.63937e-07	1.46324e-05	yes	down	0.15649	0.12961	0.173359	0	0	0	0.153153	0	Col4a1	collagen alpha-1(IV) chain [Castor canadensis]	XP_020921569.1
Chr11_12222375_12278556	Pig.03511	0.215458	-2.21452	0.00491414	0.0539364	yes	down	0.0204118	0.0324024	0.0600089	0.0290349	0.0356769	0.0223991	0.0376077	0.029037	PAN3-201	PAB-dependent poly(A)-specific ribonuclease subunit PAN3 isoform X1 [Sus scrofa]	XP_005668351.1
Chr11_12275090_12278556	Pig.03511	0.191543	-2.38426	0.00352319	0.0415217	yes	down	0.0340197	0.0907267	0.133353	0.101622	0.0285416	0.0522646	0.0860332	0.0608094	PAN3-201	PAB-dependent poly(A)-specific ribonuclease subunit PAN3 isoform X1 [Sus scrofa]	XP_005668351.1
Chr11_12275090_12285784	Pig.03511	0.0817396	-3.61282	0.0340745	0.209084	yes	down	0.0544315	0.0712853	0.0666766	0.0217761	0	0.0373319	0.0641311	0.0197027	PAN3-201	PAB-dependent poly(A)-specific ribonuclease subunit PAN3 isoform X1 [Sus scrofa]	XP_005668351.1
Chr11_12275090_12291797	Pig.03511	0.117396	-3.09054	0.0157235	0.126103	yes	down	0.0476275	0.0324024	0.0666766	0.0145174	0	0.0447982	0.0489022	0.0197719	PAN3-201	PAB-dependent poly(A)-specific ribonuclease subunit PAN3 isoform X1 [Sus scrofa]	XP_005668351.1
Chr11_12275090_12300096	Pig.03511	0.0252508	-5.30753	7.63114e-07	3.76909e-05	yes	down	0.0952551	0.0777657	0.0600089	0.0217761	0	0	0.0776766	0.00725871	PAN3-201	PAB-dependent poly(A)-specific ribonuclease subunit PAN3 isoform X1 [Sus scrofa]	XP_005668351.1
Chr11_12285086_12300096	Pig.03511	0.0566858	-4.14087	0.00361677	0.042349	yes	down	0.0340197	0.0453634	0.020003	0	0	0.0223991	0.0331287	0.00746637	PAN3-201	PAB-dependent poly(A)-specific ribonuclease subunit PAN3 isoform X1 [Sus scrofa]	XP_005668351.1
Chr11_12464386_12465127	Pig.03510	0.286952	-1.80112	0.00615334	0.0630775	yes	down	0.0680393	0.0518438	0.0800119	0.0798458	0.0570831	0.0671974	0.0666317	0.0680421	FLT1-201	vascular endothelial growth factor receptor 1 isoform X2 [Sus scrofa]	XP_001925775.5
Chr11_1781440_1784036	Pig.18473	0.392099	-1.35071	0.020772	0.152094	yes	down	0.0612354	0.0453634	0.106683	0.0435523	0.107031	0.141861	0.0710938	0.0974814	ARHGEF7-201	rho guanine nucleotide exchange factor 7 isoform X9 [Sus scrofa]	XP_020921591.1
Chr11_22877583_22899081	Pig.03441,MSTRG.27747	2.49966	1.32173	0.027886	0.183779	yes	up	0.0544315	0.0648048	0.0466736	0.442782	0.720674	0.41065	0.0553033	0.524702	#N/A	#N/A	#N/A
Chr11_24635785_24644297		43.047	5.42784	0.000181617	0.0037376	yes	up	0	0	0	0.210503	0.199791	0.16426	0	0.191518	#N/A	#N/A	#N/A
Chr11_25906891_25912394		0.394653	-1.34134	0.0141122	0.116346	yes	down	0.170098	0.252739	0.240036	0.399229	0.285416	0.313588	0.220958	0.332744	#N/A	#N/A	#N/A
Chr11_28097453_28120959	Pig.07328	23.2068	4.53647	0.0334816	0.206946	yes	up	0	0	0	0.0943633	0.0784893	0.134395	0	0.102416	EPSTI1-201	epithelial-stromal interaction protein 1 isoform X1 [Sus scrofa]	XP_003482944.1
Chr11_28823280_28824215	Pig.07332	0.0111589	-6.48567	0.00538335	0.0573485	yes	down	0.0340197	0	0.0866795	0	0	0	0.0402331	0	DGKH-201	LOW QUALITY PROTEIN: diacylglycerol kinase eta [Sus scrofa]	XP_020921283.1
Chr11_29171746_29198981		3.35713	1.74723	0.0115571	0.100913	yes	up	0.0408236	0.0324024	0.0466736	0.391971	0.585102	0.470381	0.0399665	0.482485	#N/A	#N/A	#N/A
Chr11_29183690_29198981		20.6153	4.36565	0.0259027	0.175254	yes	up	0	0	0	0.123398	0.0998955	0.0522646	0	0.0918527	#N/A	#N/A	#N/A
Chr11_34579623_34579988	Pig.07349	0.00573342	-7.44639	6.63922e-05	0.00163959	yes	down	0.0748433	0.0518438	0.0666766	0	0	0	0.0644546	0	PCDH17-201	protocadherin-17 isoform X1 [Sus scrofa]	XP_020921306.1
Chr11_4429771_4437719	Pig.03585	46.4644	5.53805	0.000322406	0.00592208	yes	up	0	0	0	0.137916	0.221197	0.261323	0	0.206812	FAH-201	fumarylacetoacetase [Sus scrofa]	XP_003356696.1
Chr11_4445554_4455476	Pig.03585	13.228	3.72552	0.000956363	0.0146364	yes	up	0.0204118	0	0	0.239538	0.363905	0.313588	0.00680393	0.305677	FAH-201	fumarylacetoacetase [Sus scrofa]	XP_003356696.1
Chr11_4643518_4643948	Pig.03582	21.8562	4.44997	0.0386657	0.22564	yes	up	0	0	0	0.0580697	0.164114	0.0746637	0	0.0989491	Mthfs	5-formyltetrahydrofolate cyclo-ligase isoform X1 [Sus scrofa]	XP_020954505.1
Chr11_4643518_4687351		5.38622	2.42927	1.74454e-06	7.5223e-05	yes	up	0.0748433	0.0324024	0.0933472	1.23398	1.24869	1.22449	0.0668643	1.23572	#N/A	#N/A	#N/A
Chr11_56028794_56032206	Pig.04511	6.01452	2.58845	3.77261e-09	3.4161e-07	yes	up	0.0680393	0.0194414	0.106683	1.1251	1.34145	1.48581	0.0647211	1.31745	NDFIP2-202	NEDD4 family-interacting protein 2 [Sus scrofa]	XP_001926612.1
Chr11_56028794_56037997	Pig.04511	10.634	3.41061	1.05748e-11	2.20974e-09	yes	up	0.108863	0.0324024	0.0933472	2.23568	3.23233	3.05375	0.0782042	2.84059	NDFIP2-202	NEDD4 family-interacting protein 2 [Sus scrofa]	XP_001926612.1
Chr11_56028794_56044515	Pig.04511	23.3767	4.547	0.000142738	0.00311444	yes	up	0.0136079	0	0	0.319383	0.520883	0.261323	0.00453596	0.367197	NDFIP2-202	NEDD4 family-interacting protein 2 [Sus scrofa]	XP_001926612.1
Chr11_56028794_56048891	Pig.04511	4.87558	2.28557	0.000949594	0.0146151	yes	up	0.0476275	0	0.0266706	0.348418	0.592237	0.276256	0.0247661	0.405637	NDFIP2-202	NEDD4 family-interacting protein 2 [Sus scrofa]	XP_001926612.1
Chr11_56028794_56052028		7.40779	2.88904	0.00473023	0.0525549	yes	up	0	0.0194414	0.0133353	0.210503	0.27828	0.447982	0.0109256	0.312255	#N/A	#N/A	#N/A
Chr11_6994653_6999362	Pig.03552	5.83456	2.54462	0.006431	0.0652923	yes	up	0.0272157	0	0.020003	0.28309	0.285416	0.335987	0.0157396	0.301497	PARP4-202	poly [ADP-ribose]	XP_020921664.1
Chr11_7001257_7015265	Pig.03552	35.292	5.14127	0.0022739	0.0294847	yes	up	0	0	0	0.137916	0.18552	0.149327	0	0.157588	PARP4-202	poly [ADP-ribose]	XP_020921664.1
Chr11_7153139_7181961	Pig.03550	0.299296	-1.74036	0.0383686	0.224388	yes	down	0.0544315	0.0712853	0.0533413	0.0435523	0.0570831	0.104529	0.059686	0.0683882	PSPC1-201	paraspeckle component 1 isoform X2 [Sus scrofa]	XP_020921078.1
Chr11_73469919_73470694		0.332459	-1.58875	0.000172634	0.00357985	yes	down	0.19051	0.174973	0.406727	0.188727	0.37104	0.343453	0.257403	0.301073	#N/A	#N/A	#N/A
Chr11_76002315_76016047	Pig.07939	5.32972	2.41406	0.0351939	0.211053	yes	up	0.0136079	0	0.020003	0.22502	0.235468	0.126928	0.0112036	0.195805	PCCA-204	propionyl-CoA carboxylase alpha chain, mitochondrial isoform X1 [Sus scrofa]	XP_020921525.1
Chr11_76729156_76730764	Pig.07943	0.0123256	-6.3422	0.00141913	0.0205056	yes	down	0.0408236	0	0.0666766	0	0	0	0.0358334	0	NALCN	sodium leak channel non-selective protein isoform X1 [Sus scrofa]	XP_020921537.1
Chr11_81152042_81152325	Pig.07954	0.0336204	-4.89452	0.00597514	0.0619522	yes	down	0.0204118	0.012961	0.106683	0	0	0.0149327	0.0466851	0.00497758	EFNB2-201	EFNB2 [Sus scrofa]	AHA44850.1
Chr11_82932722_82981452	Pig.07964	30.7225	4.94122	0.00903402	0.0839006	yes	up	0	0	0	0.116139	0.0713539	0.216525	0	0.134673	MYO16	LOW QUALITY PROTEIN: unconventional myosin-XVI [Sus scrofa]	XP_020921564.1
Chr11_82963694_82981452	Pig.07964	21.2821	4.41157	0.0324781	0.202393	yes	up	0	0	0	0.0580697	0.164114	0.0671974	0	0.0964603	MYO16	LOW QUALITY PROTEIN: unconventional myosin-XVI [Sus scrofa]	XP_020921564.1
Chr11_9492371_9494613	Pig.03533	23.9653	4.58287	0.0285265	0.186503	yes	up	0	0	0	0.050811	0.18552	0.0895965	0	0.108643	Spata13	LOW QUALITY PROTEIN: spermatogenesis-associated protein 13 [Sus scrofa]	XP_020921131.1
Chr11_9839884_9854924	Pig.03531	0.252659	-1.98474	0.0235818	0.165569	yes	down	0.0476275	0.0453634	0.0800119	0.0217761	0.0998955	0.0373319	0.0576676	0.0530012	MTMR6-201	PREDICTED: myotubularin-related protein 6 [Equus caballus]	XP_001491744.2
Chr12_10582695_10617499	Pig.14142	2.72955	1.44866	0.0443603	0.243744	yes	up	0.0204118	0.0194414	0.0400059	0.195985	0.306822	0.268789	0.0266197	0.257199	MAP2K4-201	dual specificity mitogen-activated protein kinase kinase 4 isoform X1 [Sus scrofa]	XP_020923549.1
Chr12_1424577_1425218	Pig.18315	6.29507	2.65422	0.0247414	0.169937	yes	up	0.0204118	0	0	0.174209	0.171249	0.0895965	0.00680393	0.145018	SEPTIN9-201	LOW QUALITY PROTEIN: septin-9 [Sus scrofa]	XP_005653913.2
Chr12_21007643_21039228	Pig.11860	0.311977	-1.68049	0.0145035	0.11885	yes	down	0.0340197	0.0453634	0.0266706	0.0435523	0.0428123	0.0373319	0.0353512	0.0412322	SSH1-201	LOW QUALITY PROTEIN: protein phosphatase Slingshot homolog 2 [Sus scrofa]	XP_020923177.1
Chr12_22739009_22740998	Pig.11812	0.0846183	-3.56289	0.0413725	0.235122	yes	down	0.0272157	0	0.0533413	0	0.0214062	0	0.0268523	0.00713539	KSR1-201	kinase suppressor of Ras 1 isoform X3 [Sus scrofa]	XP_005669140.1
Chr12_27226046_27254638		44.5417	5.47709	0.00429205	0.0489889	yes	up	0	0	0	0.217761	0.221197	0.156794	0	0.198584	#N/A	#N/A	#N/A
Chr12_27312206_27315092	MSTRG.29412	2.36813e-09	-28.6536	1.66369e-09	1.73824e-07	yes	down	0	1.67196	4.40065	0	0	0	2.02421	0	0	0	XP_020923050.1
Chr12_27312206_27337243	MSTRG.29412	0.0113491	-6.46128	0.000143684	0.00312254	yes	down	0.0476275	0.0324024	0.0133353	0	0	0	0.0311217	0	0	0	XP_020923050.1
Chr12_27312206_27340379	MSTRG.29412	190328	17.5381	3.15888e-05	0.000889232	yes	up	0	0	0	0.0653284	0	0.0970628	0	0.0541304	0	0	XP_020923050.1
Chr12_27312206_27348924	MSTRG.29412,Pig.11225	0.0107505	-6.53945	5.61524e-09	4.76681e-07	yes	down	2.40179	1.65252	4.0206	0.0871046	0.0927601	0.119462	2.69164	0.0997755	#N/A	#N/A	#N/A
Chr12_27312212_27323763	MSTRG.29412,Pig.11225	0.0218503	-5.5162	0.0388361	0.226391	yes	down	0.0408236	0.103688	0	0.0145174	0	0	0.0481704	0.00483914	#N/A	#N/A	#N/A
Chr12_27312212_27331982	MSTRG.29412,Pig.11225	0.0472166	-4.40456	0.0417213	0.236086	yes	down	0.0408236	0.0194414	0.0866795	0	0	0.0223991	0.0489815	0.00746637	#N/A	#N/A	#N/A
Chr12_27312212_27340379	MSTRG.29412	0.00869669	-6.84532	0.0079636	0.0771234	yes	down	0.0544315	0.0259219	0.0533413	0	0	0	0.0445649	0	0	0	XP_020923050.1
Chr12_27312212_27348924	MSTRG.29412,Pig.11225	0.00850619	-6.87727	0.00443278	0.0502783	yes	down	0.0748433	0.0194414	0.0466736	0	0	0	0.0469861	0	#N/A	#N/A	#N/A
Chr12_27314991_27329252	MSTRG.29412	0.00735795	-7.08648	0.0321711	0.201181	yes	down	0	0.0518438	0.0933472	0	0	0	0.048397	0	0	0	XP_020923050.1
Chr12_27337142_27348924	MSTRG.29412	0.0129979	-6.26557	2.42702e-05	0.000712756	yes	down	0	0.861904	2.66039	0.0290349	0.0642185	0.0671974	1.1741	0.0534836	0	0	XP_020923050.1
Chr12_27353284_27357916	MSTRG.29412,Pig.11225	0.0538798	-4.21411	0.0240235	0.166867	yes	down	0.0408236	0.0259219	0.0933472	0	0.0142708	0.0149327	0.0533642	0.00973451	#N/A	#N/A	#N/A
Chr12_27998262_28002402	Pig.11217	0.364736	-1.45507	0.00512434	0.0553609	yes	down	0.183706	0.0712853	0.11335	0.188727	0.128437	0.149327	0.122781	0.155497	ACACA-203	acetyl-CoA carboxylase 1 isoform X1 [Sus scrofa]	XP_020921886.1
Chr12_28082367_28086865	Pig.11217	0.403127	-1.31069	0.00297341	0.0368825	yes	down	0.244942	0.103688	0.206697	0.239538	0.235468	0.298655	0.185109	0.257887	ACACA-203	acetyl-CoA carboxylase 1 isoform X1 [Sus scrofa]	XP_020921886.1
Chr12_28082367_28107656	Pig.11217	0.0467266	-4.41961	0.048003	0.254485	yes	down	0.0544315	0.012961	0.0266706	0.0145174	0	0	0.0313544	0.00483914	ACACA-203	acetyl-CoA carboxylase 1 isoform X1 [Sus scrofa]	XP_020921886.1
Chr12_28100174_28155621	Pig.11217	0.0193156	-5.69409	0.0115902	0.100913	yes	down	0.0136079	0.012961	0.0333383	0	0	0	0.019969	0	ACACA-203	acetyl-CoA carboxylase 1 isoform X1 [Sus scrofa]	XP_020921886.1
Chr12_30807267_30853831		29.3312	4.87437	0.00446403	0.0504222	yes	up	0	0	0	0.152433	0.0856247	0.149327	0	0.129128	#N/A	#N/A	#N/A
Chr12_30845859_30853831		76.2024	6.25176	7.78013e-06	0.000281796	yes	up	0	0	0	0.355677	0.249739	0.403184	0	0.3362	#N/A	#N/A	#N/A
Chr12_31796253_31823882	Pig.11176	0.292666	-1.77267	1.52636e-06	6.85348e-05	yes	down	0.22453	0.0907267	0.273374	0.16695	0.228332	0.194126	0.19621	0.19647	RAD51C-201	DNA repair protein RAD51 homolog 3 isoform X1 [Sus scrofa]	XP_020922938.1
Chr12_3458862_3478097	Pig.19814	11.3706	3.50723	0.0260518	0.175825	yes	up	0	0	0	0.0145174	0.0713539	0.0671974	0	0.0510229	EIF4A3-201	eukaryotic initiation factor 4A-III [Bos taurus]	NP_001039653.1
Chr12_3474168_3478097	Pig.19814	3.74357	1.90441	0.000144987	0.00312586	yes	up	0.0544315	0.0324024	0.0400059	0.413747	0.663591	0.612243	0.0422799	0.563193	EIF4A3-201	eukaryotic initiation factor 4A-III [Bos taurus]	NP_001039653.1
Chr12_35602425_35605267	MSTRG.29616,Pig.13391	24.6502	4.62353	0.0273615	0.181952	yes	up	0	0	0	0.0653284	0.171249	0.0970628	0	0.111214	#N/A	#N/A	#N/A
Chr12_35602425_35606295	MSTRG.29616,Pig.13391	50.0048	5.644	0.000318917	0.00589346	yes	up	0	0	0	0.312125	0.171249	0.179193	0	0.220856	#N/A	#N/A	#N/A
Chr12_40853263_40853381	MSTRG.29689	0.00028223	-11.7908	4.33211e-17	3.36234e-14	yes	down	1.25192	1.70437	0.42673	0	0	0	1.12767	0	0	0	OWK14899.1
Chr12_42160240_42162931	Pig.14472	0.0223194	-5.48556	0.041901	0.236086	yes	down	0.0136079	0	0.0466736	0	0	0	0.0200938	0	CALCOCO2-201	calcium-binding and coiled-coil domain-containing protein 2 [Sus scrofa]	XP_003131600.1
Chr12_4237912_4240069	Pig.19996	0.0995896	-3.32786	0.0423758	0.237839	yes	down	0.0544315	0.0324024	0.0600089	0.0145174	0.0142708	0.0223991	0.0489476	0.0170624	SLC38A10-201	LOW QUALITY PROTEIN: putative sodium-coupled neutral amino acid transporter 10 [Sus scrofa]	XP_005668630.2
Chr12_47059189_47062026		0.0554618	-4.17236	1.44319e-07	8.52267e-06	yes	down	0.258549	0.13609	0.253371	0.0145174	0.0285416	0.0821301	0.216003	0.0417297	#N/A	#N/A	#N/A
Chr12_48467152_48485307		145.847	7.18831	0.00592522	0.0617236	yes	up	0	0	0	0.558921	0.620779	0.76157	0	0.64709	#N/A	#N/A	#N/A
Chr12_48468550_48486979		0.001701	-9.1994	4.77765e-08	3.28569e-06	yes	down	0.102059	0.27218	0.206697	0	0	0	0.193645	0	#N/A	#N/A	#N/A
Chr12_48587972_48592895		0.291837	-1.77676	0.00737331	0.0732343	yes	down	0.108863	0.0388829	0.106683	0.0943633	0.107031	0.0522646	0.0848094	0.0845529	#N/A	#N/A	#N/A
Chr12_48641949_48684250		0.142369	-2.8123	0.0106984	0.0960673	yes	down	0	0.200895	0.280042	0.0798458	0.114166	0.0746637	0.160312	0.0895586	#N/A	#N/A	#N/A
Chr12_5009982_5022738	Pig.20964	0.421266	-1.2472	0.00341925	0.040805	yes	down	0.129275	0.0972072	0.100015	0.123398	0.235468	0.141861	0.108832	0.166909	FOXK2-201	forkhead box protein K2 isoform X1 [Sus scrofa]	XP_003357968.2
Chr12_52735137_52745435	Pig.08065	0.138478	-2.85227	0.0183372	0.138997	yes	down	0.0680393	0.0194414	0.0533413	0.0217761	0.0214062	0.0223991	0.0469407	0.0218605	PECAM1-201	platelet endothelial cell adhesion molecule precursor [Sus scrofa]	NP_999072.1
Chr12_55637737_55645324	Pig.08039	24.0744	4.58943	0.0253563	0.173721	yes	up	0	0	0	0.123398	0.0998955	0.0970628	0	0.106785	ARSG-201	arylsulfatase G isoform X1 [Sus scrofa]	XP_013845359.1
Chr12_56004263_56093033		0.0208352	-5.58483	0.00035507	0.00638773	yes	down	0.0816472	0.13609	0.153356	0.0290349	0	0	0.123698	0.00967828	#N/A	#N/A	#N/A
Chr12_61007740_61009484	Pig.07996	12.7007	3.66683	0.0450507	0.245497	yes	up	0	0	0	0.0362936	0.107031	0.0298655	0	0.05773	NAT9	N-acetyltransferase 9 isoform X1 [Sus scrofa]	XP_005668672.1
Chr12_6535923_6536562		0.19356	-2.36915	0.0158455	0.126788	yes	down	0.0680393	0.0712853	0.240036	0.159692	0.0499477	0.0373319	0.126453	0.0823238	#N/A	#N/A	#N/A
Chr12_6535923_6554029		0.175431	-2.51102	0.0347932	0.210638	yes	down	0.0476275	0.0648048	0.0400059	0.050811	0	0.0522646	0.0508128	0.0343585	#N/A	#N/A	#N/A
Chr12_6541810_6554029		0.0589001	-4.08559	9.76381e-06	0.000342237	yes	down	0.108863	0.116649	0.2267	0.0580697	0.0214062	0.0149327	0.150737	0.0314695	#N/A	#N/A	#N/A
Chr12_6541810_6560705		0.169266	-2.56264	0.0206056	0.151489	yes	down	0.176902	0.0453634	0.120018	0.0290349	0.0998955	0.0671974	0.114094	0.0653759	#N/A	#N/A	#N/A
Chr12_6986673_7002516		3.22982	1.69145	0.0320558	0.200875	yes	up	0.0408236	0.0388829	0	0.326642	0.413853	0.268789	0.0265688	0.336428	#N/A	#N/A	#N/A
Chr12_7000916_7002516		16.6034	4.0534	0.00426577	0.0487914	yes	up	0	0.012961	0	0.268572	0.292551	0.335987	0.00432032	0.299037	#N/A	#N/A	#N/A
Chr13_101257566_101258125		38.3935	5.26279	0.00510795	0.0553609	yes	up	0	0	0	0.195985	0.149843	0.16426	0	0.17003	#N/A	#N/A	#N/A
Chr13_101290645_101300295	Pig.06518	18.0633	4.17499	0.0104016	0.0940297	yes	up	0	0	0	0.0725871	0.0784893	0.0895965	0	0.0802243	MAP3K13-201	mitogen-activated protein kinase kinase kinase 13 [Sus scrofa]	XP_020925639.1
Chr13_101669786_101691624		0.108942	-3.19837	0.000898326	0.0139446	yes	down	0.0408236	0.0259219	0.0466736	0.0290349	0.0142708	0	0.0378064	0.0144352	#N/A	#N/A	#N/A
Chr13_10239822_10246104	Pig.15846	0.427398	-1.22635	2.76992e-05	0.000798514	yes	down	0.231334	0.174973	0.420062	0.406488	0.413853	0.41065	0.275456	0.41033	RBM6-201	RNA-binding protein 6 isoform X1 [Sus scrofa]	XP_003483235.1
Chr13_102467284_102479788	MSTRG.32189,Pig.06534	93.2603	6.54319	6.39673e-07	3.24798e-05	yes	up	0	0	0	0.319383	0.63505	0.306121	0	0.420185	#N/A	#N/A	#N/A
Chr13_102470212_102478285	MSTRG.32189,Pig.06534	115.049	6.84611	2.01229e-06	8.40981e-05	yes	up	0	0	0	0.464558	0.606508	0.470381	0	0.513816	#N/A	#N/A	#N/A
Chr13_102470212_102479788	MSTRG.32189,Pig.06534	726.215	9.50425	3.97254e-15	1.66022e-12	yes	up	0	0	0	2.54781	3.62478	3.53906	0	3.23722	#N/A	#N/A	#N/A
Chr13_102470212_102491735	MSTRG.32189,Pig.06534	25.1883	4.65468	0.0455003	0.246728	yes	up	0	0	0	0.0798458	0.171249	0.0895965	0	0.113564	#N/A	#N/A	#N/A
Chr13_102470212_102498161	MSTRG.32189,Pig.06534	86.8744	6.44086	2.29052e-06	9.28686e-05	yes	up	0	0	0	0.370194	0.44953	0.343453	0	0.387726	#N/A	#N/A	#N/A
Chr13_102744260_102753420	Pig.06539	49.9201	5.64155	0.000462442	0.00795653	yes	up	0	0	0	0.137916	0.164114	0.358386	0	0.220138	ST6GAL1-201	beta-galactoside alpha-2,6-sialyltransferase 1 isoform X1 [Sus scrofa]	XP_020925678.1
Chr13_103965370_103965570		0.0769896	-3.69919	0.0165887	0.130808	yes	down	0.0204118	0.0777657	0	0	0.0214062	0.0149327	0.0327258	0.012113	#N/A	#N/A	#N/A
Chr13_10429524_10429861	Pig.15844	0.0329956	-4.92158	0.0026082	0.0330311	yes	down	0.0408236	0.0194414	0.0733442	0.0145174	0	0	0.0445364	0.00483914	SEMA3F-201	semaphorin-3F isoform X1 [Sus scrofa]	XP_001925178.2
Chr13_110325473_110341942	Pig.15077	0.248197	-2.01044	0.0079569	0.0771234	yes	down	0.176902	0.0453634	0.106683	0.0798458	0.107031	0.0895965	0.109649	0.0921577	ACAP2-202	arf-GAP with coiled-coil, ANK repeat and PH domain-containing protein 2 isoform X8 [Sus scrofa]	XP_020925743.1
Chr13_110953548_110983363	Pig.15072	0.335617	-1.57511	0.0415808	0.236059	yes	down	0.0748433	0.012961	0.106683	0.0580697	0.0713539	0.0821301	0.0648289	0.0705179	DLG1-202	disks large homolog 1 isoform X1 [Sus scrofa]	XP_020925751.1
Chr13_111996329_112001406		18.7105	4.22578	0.0107831	0.0963276	yes	up	0	0	0	0.130657	0.0570831	0.059731	0	0.0824903	#N/A	#N/A	#N/A
Chr13_113016848_113038677		2.95967	1.56543	1.49856e-06	6.78475e-05	yes	up	0.272157	0.0388829	0.253371	1.50981	2.09067	1.94872	0.188137	1.84973	#N/A	#N/A	#N/A
Chr13_113904848_113948236	Pig.02185	30.5318	4.93224	0.0115667	0.100913	yes	up	0	0	0	0.137916	0.199791	0.0746637	0	0.137457	TRIO-201	PREDICTED: kalirin isoform X8 [Ovis aries musimon]	XP_025137194.1
Chr13_113922653_113948236	Pig.02185	69.8555	6.1263	1.57092e-05	0.000508024	yes	up	0	0	0	0.34116	0.37104	0.223991	0	0.312064	TRIO-201	PREDICTED: kalirin isoform X8 [Ovis aries musimon]	XP_025137194.1
Chr13_113946119_113948236	Pig.02185	101.931	6.67144	1.69932e-05	0.000533664	yes	up	0	0	0	0.312125	0.570831	0.485314	0	0.45609	TRIO-201	PREDICTED: kalirin isoform X8 [Ovis aries musimon]	XP_025137194.1
Chr13_115606140_115609412	Pig.02177	5.51035	2.46214	0.0436758	0.241394	yes	up	0.0204118	0.012961	0	0.217761	0.285416	0.194126	0.0111243	0.232434	PDIA5-201	protein disulfide-isomerase A5 [Sus scrofa]	XP_003132681.3
Chr13_12610744_12611230	Pig.10929	7.02655	2.81282	0.00971883	0.0885946	yes	up	0	0	0.0266706	0.181468	0.214062	0.223991	0.00889021	0.206507	NEK4-203	serine/threonine-protein kinase Nek4 isoform X2 [Sus scrofa]	XP_020924589.1
Chr13_126149254_126150599	Pig.02084	0.299342	-1.74013	0.00207959	0.0279664	yes	down	0.503491	0.324024	0.673433	0.399229	0.470936	0.694373	0.500316	0.521513	PHLDB2-201	LOW QUALITY PROTEIN: pleckstrin homology-like domain family B member 2 [Sus scrofa]	XP_020926050.1
Chr13_126189693_126191041	Pig.02084	14.0263	3.81006	0.000651704	0.0105693	yes	up	0	0	0.0266706	0.500851	0.342499	0.380785	0.00889021	0.408045	PHLDB2-201	LOW QUALITY PROTEIN: pleckstrin homology-like domain family B member 2 [Sus scrofa]	XP_020926050.1
Chr13_126189693_126223532		76.4967	6.25733	2.09332e-05	0.000631835	yes	up	0	0	0	0.275831	0.413853	0.335987	0	0.34189	#N/A	#N/A	#N/A
Chr13_12656906_12657860	MSTRG.30947,MSTRG.30945	27.1716	4.76403	0.0176159	0.135371	yes	up	0	0	0	0.0362936	0.156979	0.171727	0	0.121666	#N/A	#N/A	#N/A
Chr13_126811720_126814276	Pig.02081	26.8859	4.74878	0.00240325	0.0307945	yes	up	0	0	0	0.0725871	0.178385	0.111996	0	0.120989	NECTIN3-201	nectin-3 isoform X2 [Sus scrofa]	XP_020926054.1
Chr13_126811720_126850038	Pig.02081	8.17718	3.0316	3.94059e-10	4.86574e-08	yes	up	0.0680393	0.0259219	0.0466736	1.21946	1.61973	1.18715	0.0468783	1.34212	NECTIN3-201	nectin-3 isoform X2 [Sus scrofa]	XP_020926054.1
Chr13_126811720_126850641	Pig.02081	26.1701	4.70985	0.00295065	0.0366839	yes	up	0	0	0	0.181468	0.107031	0.059731	0	0.116077	NECTIN3-201	nectin-3 isoform X2 [Sus scrofa]	XP_020926054.1
Chr13_126832355_126850038	Pig.02081	9.63445	3.2682	1.01077e-17	9.15249e-15	yes	up	0.19051	0.0583243	0.106683	3.09947	5.36581	3.47933	0.118506	3.98154	NECTIN3-201	nectin-3 isoform X2 [Sus scrofa]	XP_020926054.1
Chr13_126832355_126850641	Pig.02081	134.535	7.07184	5.68449e-08	3.76632e-06	yes	up	0	0	0	0.500851	0.784893	0.522646	0	0.602797	NECTIN3-201	nectin-3 isoform X2 [Sus scrofa]	XP_020926054.1
Chr13_126837639_126850038	Pig.02081	6.13278	2.61654	6.98516e-05	0.00171721	yes	up	0.0408236	0	0.0333383	0.355677	0.606508	0.559978	0.0247206	0.507388	NECTIN3-201	nectin-3 isoform X2 [Sus scrofa]	XP_020926054.1
Chr13_12812644_12829260		22.8506	4.51416	0.0273508	0.181952	yes	up	0	0	0	0.0653284	0.178385	0.0671974	0	0.103637	#N/A	#N/A	#N/A
Chr13_146311647_146312307	Pig.00949	0.0304195	-5.03886	0.024413	0.168748	yes	down	0.0204118	0.0453634	0.0666766	0	0	0.0149327	0.0441506	0.00497758	EPHA3-201	PREDICTED: ephrin type-A receptor 3-like [Physeter catodon]	NP_001182264.1
Chr13_153226350_153265853	Pig.00962,MSTRG.32815	0.391789	-1.35185	0.00996611	0.0906966	yes	down	0.210922	0.0972072	0.133353	0.217761	0.214062	0.179193	0.147161	0.203672	#N/A	#N/A	#N/A
Chr13_153226350_153311960	Pig.00962,MSTRG.32815	0.106882	-3.22591	0.000743681	0.0118487	yes	down	0.176902	0.0648048	0.0666766	0.0290349	0.0428123	0.0447982	0.102795	0.0388818	#N/A	#N/A	#N/A
Chr13_169351797_169415970	Pig.15023	0.0181772	-5.78172	0.00315458	0.0386881	yes	down	2.53787	2.35889	2.69373	0.232279	0.292551	0	2.53016	0.174943	APP-203	PREDICTED: amyloid beta A4 protein, partial [Galeopterus variegatus]	NP_999537.1
Chr13_17207927_17208194	Pig.10900	0.296753	-1.75267	0.00875409	0.0820017	yes	down	0.108863	0.0583243	0.0866795	0.0798458	0.121302	0.0671974	0.0846223	0.0894483	DENND6A-201	protein DENND6A isoform X1 [Sus scrofa]	XP_020924668.1
Chr13_180597519_180621458		0.350315	-1.51327	0.00100833	0.0152598	yes	down	0.204118	0.110168	0.173359	0.22502	0.214062	0.16426	0.162548	0.201114	#N/A	#N/A	#N/A
Chr13_181182501_181207763		2.29092	1.19593	0.0291995	0.18841	yes	up	0.0748433	0.0194414	0.0333383	0.210503	0.385311	0.418117	0.042541	0.337977	#N/A	#N/A	#N/A
Chr13_181944033_181946060	Pig.20121	0.0489825	-4.35159	0.0151932	0.122834	yes	down	0.0340197	0.0194414	0.0333383	0	0	0.0149327	0.0289331	0.00497758	ERG-201	transcriptional regulator ERG isoform X1 [Sus scrofa]	XP_020924127.1
Chr13_188539138_188539513	Pig.21788,MSTRG.33300	0.00202696	-8.94647	1.95284e-05	0.000602829	yes	down	0.15649	0.233297	0.0866795	0	0	0	0.158822	0	#N/A	#N/A	#N/A
Chr13_188650608_188651323	Pig.20313	62.8673	5.97424	0.000200698	0.0040535	yes	up	0	0	0	0.275831	0.44953	0.126928	0	0.284096	Ftcd	formimidoyltransferase-cyclodeaminase [Sus scrofa]	NP_999440.1
Chr13_228475_229511		72.1147	6.17222	5.92003e-05	0.00150297	yes	up	0	0	0	0.297607	0.385311	0.283722	0	0.322213	#N/A	#N/A	#N/A
Chr13_23944679_23949381	Pig.01523	0.0398063	-4.65086	0.0236873	0.166018	yes	down	0.0884511	0.012961	0.0733442	0.0217761	0	0	0.0582521	0.00725871	ADAMTS9-201	A disintegrin and metalloproteinase with thrombospondin motifs 9 isoform X2 [Sus scrofa]	XP_003132346.4
Chr13_28511452_28518709	Pig.01536	3.19085	1.67394	0.00606635	0.0623223	yes	up	0.0408236	0.0194414	0.0400059	0.28309	0.392446	0.440516	0.0334237	0.372017	FRMD4B-204	FERM domain-containing protein 4B isoform X4 [Sus scrofa]	XP_020924862.1
Chr13_30295122_30307830	Pig.01539	0.267289	-1.90353	0.0450303	0.245497	yes	down	0.0340197	0.0259219	0.0400059	0.0435523	0.0214062	0.0298655	0.0333158	0.031608	FOXP1-203	forkhead box protein P1 isoform X4 [Sus scrofa]	XP_020926500.1
Chr13_4355865_4359504	Pig.07846	0.216201	-2.20956	8.11638e-05	0.0019256	yes	down	0.122471	0.116649	0.260039	0.101622	0.128437	0.149327	0.166386	0.126462	SNRK-201	SNF-related serine/threonine-protein kinase isoform X1 [Sus scrofa]	XP_020927373.1
Chr13_46154665_46165821	Pig.14691,MSTRG.31383	0.0081124	-6.94566	1.46566e-07	8.56229e-06	yes	down	0.244942	0.103688	0.153356	0	0.0142708	0	0.167328	0.00475693	#N/A	#N/A	#N/A
Chr13_46154665_46178093	Pig.14691,MSTRG.31383	0.00840042	-6.89532	0.00043675	0.00758103	yes	down	0.0612354	0.0324024	0.0400059	0	0	0	0.0445479	0	#N/A	#N/A	#N/A
Chr13_46374878_46382501		10.9587	3.454	0.0431828	0.23989	yes	up	0	0	0	0.0580697	0.0428123	0.0447982	0	0.0485601	#N/A	#N/A	#N/A
Chr13_48146150_48147848	MSTRG.31444,Pig.17823,MSTRG.31443	0.201485	-2.31126	0.0193301	0.143864	yes	down	0.0272157	0.0583243	0.0333383	0.0362936	0.0214062	0.0373319	0.0396261	0.0316772	#N/A	#N/A	#N/A
Chr13_48514433_48516059	Pig.17826	0.0932116	-3.42335	0.000222542	0.0043807	yes	down	0.0544315	0.0259219	0.133353	0.0145174	0.0214062	0.0298655	0.0712355	0.0219297	FBLN2-201	fibulin-2 isoform X1 [Sus scrofa]	XP_020925041.1
Chr13_52653182_52713934		2.47475e+08	27.8827	0.000100126	0.00229528	yes	up	0	0	0	0	0.506613	0	0	0.168871	#N/A	#N/A	#N/A
Chr13_52717722_52718496	MSTRG.31563,Pig.06063	39.8724	5.31732	0.00342483	0.040805	yes	up	0	0	0	0.181468	0.235468	0.119462	0	0.178799	#N/A	#N/A	#N/A
Chr13_53391484_53428936	Pig.06070	0.411785	-1.28004	0.00210955	0.0282295	yes	down	0.210922	0.187934	0.20003	0.312125	0.271145	0.321054	0.199629	0.301441	CEP63-201	centrosomal protein of 63 kDa isoform X1 [Sus scrofa]	XP_005669913.1
Chr13_60070249_60087893	Pig.06112	0.207585	-2.26823	0.0277536	0.183582	yes	down	0.0272157	0	0.0600089	0.0290349	0.0285416	0	0.0290749	0.0191921	RASA2-203	ras GTPase-activating protein 2 isoform X2 [Sus scrofa]	XP_020925202.1
Chr13_60070249_60099009	Pig.06112	0.040657	-4.62035	0.00306126	0.0377996	yes	down	0.0476275	0.0259219	0.0266706	0.0145174	0	0	0.0334067	0.00483914	RASA2-203	ras GTPase-activating protein 2 isoform X2 [Sus scrofa]	XP_020925202.1
Chr13_618153_635677	Pig.07791	23.3635	4.54619	0.0161707	0.128631	yes	up	0	0	0	0.116139	0.0570831	0.134395	0	0.102539	OXSR1-201	serine/threonine-protein kinase OSR1 [Sus scrofa]	NP_999507.1
Chr13_6575302_6576798	Pig.07873	0.0693027	-3.85094	0.031387	0.198285	yes	down	0.0544315	0.0388829	0.0466736	0.0145174	0.0214062	0	0.0466626	0.0119745	SACM1L-203	phosphatidylinositide phosphatase SAC1 isoform X1 [Sus scrofa]	XP_003358453.3
Chr13_67354140_67355382	MSTRG.31731,Pig.04766	29.0649	4.86121	0.00833378	0.0789216	yes	up	0	0	0	0.0871046	0.128437	0.171727	0	0.129089	#N/A	#N/A	#N/A
Chr13_67357897_67377692	MSTRG.31731,Pig.04766	89.2315	6.47948	1.44903e-06	6.6515e-05	yes	up	0	0	0	0.362936	0.328228	0.492781	0	0.394648	#N/A	#N/A	#N/A
Chr13_67379126_67387509	MSTRG.31731,Pig.04766	24.2305	4.59876	0.0172265	0.133942	yes	up	0	0	0	0.0580697	0.0998955	0.16426	0	0.107408	#N/A	#N/A	#N/A
Chr13_67382409_67387509	MSTRG.31731,Pig.04766	23.0418	4.52618	0.0156765	0.126103	yes	up	0	0	0	0.0725871	0.0998955	0.134395	0	0.102292	#N/A	#N/A	#N/A
Chr13_7644063_7653595	MSTRG.30700,Pig.07899	2.25659	1.17415	0.00522503	0.0561019	yes	up	0.115667	0.012961	0.126685	0.718613	0.763487	0.440516	0.0851044	0.640872	#N/A	#N/A	#N/A
Chr13_8255032_8277881	Pig.07907	0.495016	-1.01445	0.035475	0.211797	yes	down	0.0952551	0.0907267	0.11335	0.159692	0.199791	0.179193	0.0997773	0.179559	SMARCC1-201	LOW QUALITY PROTEIN: SWI/SNF complex subunit SMARCC1 [Sus scrofa]	XP_020924390.1
Chr13_86777964_86804540	Pig.11303	0.0161367	-5.95351	0.0112598	0.0997955	yes	down	0.0204118	0.012961	0.0400059	0	0	0	0.0244596	0	PHC3-201	polyhomeotic-like protein 3 isoform X1 [Sus scrofa]	XP_020925436.1
Chr13_86777964_86815919	Pig.11303	0.114502	-3.12655	6.37233e-12	1.44254e-09	yes	down	0.183706	0.174973	0.253371	0.050811	0.114166	0.0895965	0.204017	0.0848579	PHC3-201	polyhomeotic-like protein 3 isoform X1 [Sus scrofa]	XP_020925436.1
Chr13_86791164_86815919	Pig.11303	0.0763597	-3.71104	3.99275e-08	2.81722e-06	yes	down	0.0884511	0.0583243	0.0933472	0.0290349	0.0356769	0	0.0800409	0.0215706	PHC3-201	polyhomeotic-like protein 3 isoform X1 [Sus scrofa]	XP_020925436.1
Chr13_86804294_86815919	Pig.11303	0.393878	-1.34418	0.000686452	0.0110668	yes	down	0.183706	0.123129	0.306712	0.239538	0.363905	0.238924	0.204516	0.280789	PHC3-201	polyhomeotic-like protein 3 isoform X1 [Sus scrofa]	XP_020925436.1
Chr13_99006380_99013331	Pig.06483	3.48653	1.80179	0.00594899	0.0617989	yes	up	0.0476275	0.0194414	0.0533413	0.312125	0.528019	0.604776	0.0401367	0.48164	MCCC1-201	methylcrotonoyl-CoA carboxylase subunit alpha, mitochondrial isoform X1 [Sus scrofa]	XP_020925546.1
Chr14_101787913_101794200	Pig.01974	2.43508	1.28397	0.0338581	0.208325	yes	up	0.0272157	0.0324024	0.0333383	0.254055	0.235468	0.32852	0.0309855	0.272681	IDE-202	insulin-degrading enzyme isoform X1 [Sus scrofa]	XP_001925416.3
Chr14_103592358_103628217	Pig.01957	0.424422	-1.23643	0.00864832	0.0812375	yes	down	0.15649	0.116649	0.213365	0.239538	0.363905	0.134395	0.162168	0.245946	TBC1D12-201	TBC1 domain family member 12 isoform X1 [Sus scrofa]	XP_020929670.1
Chr14_104062358_104147272		394.066	8.62229	9.30683e-11	1.42424e-08	yes	up	0	0	0	1.80016	1.79098	1.665	0	1.75205	#N/A	#N/A	#N/A
Chr14_104135799_104147272	Pig.01952	320.014	8.32199	1.87432e-08	1.41433e-06	yes	up	0	0	0	1.459	1.60546	1.21702	0	1.42716	CYP2C42-206	cytochrome P450 2C18 [Sus scrofa]	XP_020929678.1
Chr14_108871875_108873556	Pig.01895	70.7627	6.14492	0.000107218	0.00242715	yes	up	0	0	0	0.319383	0.399582	0.231458	0	0.316808	ABCC2-202	LOW QUALITY PROTEIN: canalicular multispecific organic anion transporter 1 [Sus scrofa]	XP_020929369.1
Chr14_109009981_109011993		0.0179499	-5.79988	0.022448	0.160348	yes	down	0.0204118	0.0194414	0.020003	0	0	0	0.0199521	0	#N/A	#N/A	#N/A
Chr14_109086258_109091278	Pig.01892	35.1051	5.13361	0.00917109	0.084739	yes	up	0	0	0	0.0653284	0.221197	0.186659	0	0.157728	CPN1-201	carboxypeptidase N catalytic chain isoform X1 [Sus scrofa]	XP_003483585.1
Chr14_109843813_109855780	Pig.21784	28.2164	4.81846	0.0181947	0.138781	yes	up	0	0	0	0.0217761	0.171249	0.186659	0	0.126562	CYP2C42-206	cytochrome P450 2C18 [Sus scrofa]	XP_013839051.2
Chr14_112746957_112780847	Pig.16330	0.0139536	-6.16322	0.000322865	0.00592208	yes	down	0.272157	0.012961	0.0466736	0.0145174	0	0	0.110597	0.00483914	SH3PXD2A-201	SH3 and PX domain-containing protein 2A isoform X1 [Sus scrofa]	XP_020928421.1
Chr14_113362657_113380470		3.34996	1.74414	1.97567e-05	0.000603025	yes	up	0.673589	0.187934	0.400059	4.35523	5.21597	4.79341	0.420528	4.7882	#N/A	#N/A	#N/A
Chr14_11639751_11660315	Pig.05713	0.068194	-3.87421	0.000336074	0.0060863	yes	down	0.170098	0.0583243	0.11335	0	0.0356769	0.0447982	0.113924	0.0268251	SPECC1L	cytospin-A isoform X1 [Sus scrofa]	XP_020929455.1
Chr14_11652228_11660315	Pig.05713	0.015896	-5.97519	0.0389534	0.226589	yes	down	0	0.0259219	0.0400059	0	0	0	0.021976	0	SPECC1L	cytospin-A isoform X1 [Sus scrofa]	XP_020929455.1
Chr14_11660108_11704284	Pig.05713	0.0144112	-6.11667	0.0079875	0.0771951	yes	down	0.0272157	0.0259219	0.020003	0	0	0	0.0243802	0	SPECC1L	cytospin-A isoform X1 [Sus scrofa]	XP_020929455.1
Chr14_11678845_11704284	Pig.05713	0.0162248	-5.94566	0.0334324	0.206877	yes	down	0	0.0324024	0.0266706	0	0	0	0.019691	0	SPECC1L	cytospin-A isoform X1 [Sus scrofa]	XP_020929455.1
Chr14_119492192_119496019	Pig.05120	0.429941	-1.21779	0.00237126	0.030601	yes	down	0.163294	0.194414	0.326715	0.406488	0.37104	0.283722	0.228141	0.35375	PDCD4-201	programmed cell death protein 4 [Sus scrofa]	XP_001927084.1
Chr14_120756086_120760994	Pig.05127	29.062	4.86106	0.00125322	0.0185021	yes	up	0	0	0	0.174209	0.107031	0.104529	0	0.12859	GPAM-201	NR:NA	F1S5L4.3
Chr14_120982040_120985676	Pig.05131	3.58493	1.84195	0.0130149	0.109622	yes	up	0.0340197	0.012961	0.0333383	0.399229	0.306822	0.283722	0.026773	0.329924	ACSL5-201	long-chain-fatty-acid--CoA ligase 5 [Sus scrofa]	NP_001182250.1
Chr14_123885482_123894127	Pig.05149	0.201549	-2.3108	0.0366921	0.216919	yes	down	0	0.0453634	0.0600089	0.0145174	0.0142708	0.0522646	0.0351241	0.0270176	ATRNL1-201	attractin-like protein 1 isoform X2 [Sus scrofa]	XP_020930075.1
Chr14_129722138_129804031	MSTRG.35885,Pig.12074	5.28777	2.40266	7.45867e-05	0.00179305	yes	up	0.0204118	0.0194414	0.0800119	0.842011	0.72781	0.59731	0.039955	0.722377	#N/A	#N/A	#N/A
Chr14_129750351_129804031	MSTRG.35885,Pig.12074	3.98083	1.99307	5.19105e-05	0.00133663	yes	up	0.0612354	0.0453634	0.0400059	0.646025	0.55656	0.888498	0.0488682	0.697028	#N/A	#N/A	#N/A
Chr14_129783657_129804031	MSTRG.35885,Pig.12074	3.12585	1.64425	0.037882	0.22226	yes	up	0.0408236	0.0259219	0.020003	0.297607	0.385311	0.306121	0.0289162	0.32968	#N/A	#N/A	#N/A
Chr14_130038336_130039647	Pig.12077	0.0307248	-5.02445	0.0106154	0.0956361	yes	down	0.0680393	0.0453634	0.0133353	0	0	0.0149327	0.042246	0.00497758	TACC2-203	transforming acidic coiled-coil-containing protein 2 [Sus scrofa]	NP_001245281.1
Chr14_131748669_131756961		0.127524	-2.97116	0.0380091	0.222765	yes	down	0.0544315	0.0324024	0.0400059	0.0435523	0.0142708	0	0.0422799	0.0192744	#N/A	#N/A	#N/A
Chr14_132637875_132640389	MSTRG.35947	4.97804	2.31558	1.19921e-07	7.23925e-06	yes	up	0.0884511	0.0453634	0.0933472	1.55336	1.4913	0.910897	0.0757206	1.31852	0	0	XP_001929044.4
Chr14_132665225_132670868	MSTRG.35947,Pig.11537	6.79902	2.76533	0.0456541	0.246728	yes	up	0	0.012961	0	0.0871046	0.199791	0.0821301	0.00432032	0.123009	#N/A	#N/A	#N/A
Chr14_140353741_140355292	Pig.22737	11.2471	3.49148	0.0178573	0.136839	yes	up	0	0	0	0.0217761	0.0856247	0.0447982	0	0.050733	CYP2E1-202	cytochrome P450 2E1 isoform X1 [Sus scrofa]	XP_005657566.1
Chr14_18251903_18268937	Pig.10687	0.178364	-2.4871	0.0285608	0.186503	yes	down	0.122471	0.0518438	0.0533413	0.050811	0.0570831	0.0373319	0.0758853	0.0484087	BICC1-201	protein bicaudal C homolog 1 isoform X1 [Sus scrofa]	XP_020928456.1
Chr14_18251903_18277779	Pig.10687	0.0691404	-3.85433	0.0262412	0.176714	yes	down	0.0476275	0.0324024	0.11335	0.0290349	0	0.0149327	0.06446	0.0146559	BICC1-201	protein bicaudal C homolog 1 isoform X1 [Sus scrofa]	XP_020928456.1
Chr14_18956851_18968133		0.0931443	-3.42439	0.0468675	0.250375	yes	down	0.0476275	0.012961	0.0266706	0	0.0285416	0	0.0290864	0.00951385	#N/A	#N/A	#N/A
Chr14_19925712_19947453		27.632	4.78827	8.26895e-05	0.00195327	yes	up	0.0136079	0	0	0.384712	0.520883	0.388251	0.00453596	0.431282	#N/A	#N/A	#N/A
Chr14_21583839_21588341	Pig.15735	0.138394	-2.85315	0.0351012	0.211053	yes	down	0.0272157	0.012961	0.0400059	0	0	0.0373319	0.0267275	0.012444	DISC1-201	disrupted in schizophrenia 1 protein isoform X1 [Sus scrofa]	XP_020929235.1
Chr14_22954126_22963710	Pig.15740	17.3835	4.11964	0.00277595	0.0349115	yes	up	0.0136079	0	0	0.268572	0.235468	0.298655	0.00453596	0.267565	MAP3K21-201	mitogen-activated protein kinase kinase kinase MLK4 [Sus scrofa]	XP_001928249.1
Chr14_24727751_24760271	Pig.12220	10.4757	3.38898	0.0349319	0.210638	yes	up	0	0	0	0.0435523	0.0356769	0.059731	0	0.0463201	B3GALNT2-201	UDP-GalNAc:beta-1,3-N-acetylgalactosaminyltransferase 2 [Sus scrofa]	XP_020930057.1
Chr14_34850674_34869067		0.0101004	-6.62944	0.00606819	0.0623223	yes	down	0.0680393	0.012961	0.0400059	0	0	0	0.0403354	0	#N/A	#N/A	#N/A
Chr14_39070772_39073187		41.4981	5.37497	0.00150806	0.0215613	yes	up	0	0	0	0.130657	0.0856247	0.32852	0	0.181601	#N/A	#N/A	#N/A
Chr14_39143918_39144582	Pig.07737	9.90512	3.30817	0.0481425	0.254803	yes	up	0	0	0	0.0435523	0.0356769	0.0522646	0	0.0438313	PPP3CA-201	serine/threonine-protein phosphatase 2B catalytic subunit gamma isoform isoform X1 [Sus scrofa]	XP_003483429.1
Chr14_3923800_3930511	Pig.05831	0.315971	-1.66214	0.0322546	0.201425	yes	down	0.0476275	0	0.0133353	0.0435523	0.0214062	0	0.020321	0.0216528	ACACA-203	acetyl-CoA carboxylase 2 precursor [Sus scrofa]	NP_001193328.1
Chr14_41912046_41913507	Pig.07715	0.285719	-1.80733	0.000651103	0.0105693	yes	down	0.136079	0.149051	0.193362	0.116139	0.256874	0.134395	0.159497	0.169136	KCTD9-201	BTB/POZ domain-containing protein KCTD9 [Sus scrofa]	XP_003132863.3
Chr14_41912046_41931580	Pig.07715	0.224091	-2.15784	2.26311e-06	9.24471e-05	yes	down	0.149687	0.110168	0.253371	0.130657	0.128437	0.141861	0.171075	0.133652	KCTD9-201	BTB/POZ domain-containing protein KCTD9 [Sus scrofa]	XP_003132863.3
Chr14_41912046_41938885	Pig.07715	0.361231	-1.469	0.00832763	0.0789216	yes	down	0.102059	0.123129	0.153356	0.0871046	0.171249	0.24639	0.126181	0.168248	KCTD9-201	BTB/POZ domain-containing protein KCTD9 [Sus scrofa]	XP_003132863.3
Chr14_41930481_41931580	Pig.07715	0.239993	-2.05894	2.19404e-08	1.63291e-06	yes	down	0.22453	0.103688	0.133353	0.116139	0.171249	0.104529	0.153857	0.130639	KCTD9-201	BTB/POZ domain-containing protein KCTD9 [Sus scrofa]	XP_003132863.3
Chr14_41930481_41938885	Pig.07715	0.307248	-1.70252	0.00193571	0.0264904	yes	down	0.142883	0.123129	0.0666766	0.130657	0.192656	0.0671974	0.110896	0.13017	KCTD9-201	BTB/POZ domain-containing protein KCTD9 [Sus scrofa]	XP_003132863.3
Chr14_42930420_42931617	Pig.05610	0.263084	-1.9264	0.0482543	0.254803	yes	down	0.0204118	0.0324024	0.0733442	0.0725871	0.0214062	0.0223991	0.0420528	0.0387975	DPYSL2-201	dihydropyrimidinase-related protein 2 isoform X1 [Sus scrofa]	XP_001927836.1
Chr14_47342240_47351646	Pig.05570	6.05264	2.59756	0.0381385	0.223283	yes	up	0	0.0194414	0.0133353	0.22502	0.285416	0.283722	0.0109256	0.264719	FDFT1-202	squalene synthase [Sus scrofa]	NP_001161120.1
Chr14_47348104_47351646	Pig.05570	22.5887	4.49753	4.20092e-06	0.000164198	yes	up	0	0	0.0266706	0.587956	0.792028	0.649574	0.00889021	0.676519	FDFT1-202	squalene synthase [Sus scrofa]	NP_001161120.1
Chr14_47348104_47360714	Pig.05570	28.8179	4.84889	0.0303096	0.193504	yes	up	0	0	0	0.159692	0.135572	0.0895965	0	0.128287	FDFT1-202	squalene synthase [Sus scrofa]	NP_001161120.1
Chr14_52891611_52892805	Pig.05547	18.2278	4.18807	0.00739911	0.0732954	yes	up	0	0	0	0.0871046	0.0570831	0.0970628	0	0.0804168	SH3RF1-201	E3 ubiquitin-protein ligase SH3RF1 isoform X1 [Sus scrofa]	XP_020928513.1
Chr14_61996195_61997739	Pig.07212,MSTRG.34617	0.0833495	-3.58468	0.023361	0.164618	yes	down	0.0204118	0	0.0666766	0.0217761	0	0	0.0290295	0.00725871	#N/A	#N/A	#N/A
Chr14_64265041_64269173	Pig.07164	5.01238	2.32549	0.0417137	0.236086	yes	up	0	0	0.020003	0.116139	0.0998955	0.119462	0.00666766	0.111832	ATP2A2-201	sarcoplasmic/endoplasmic reticulum calcium ATPase 2 isoform X1 [Sus scrofa]	XP_020927734.1
Chr14_71395453_71403133	Pig.15466,MSTRG.34889	7.20606	2.84921	0.00342097	0.040805	yes	up	0.0204118	0	0.0133353	0.210503	0.328228	0.276256	0.011249	0.271662	#N/A	#N/A	#N/A
Chr14_73539866_73546621		9.8579	3.30128	0.0340398	0.209084	yes	up	0	0.012961	0.0133353	0.290349	0.27828	0.43305	0.00876542	0.333893	#N/A	#N/A	#N/A
Chr14_73544473_73546621		2.74767	1.45821	0.0314894	0.198702	yes	up	0.0544315	0.0194414	0.0266706	0.304866	0.356769	0.306121	0.0335145	0.322586	#N/A	#N/A	#N/A
Chr14_74007619_74014948		0.168744	-2.56709	0.00219321	0.0288516	yes	down	0.0340197	0.0194414	0.0866795	0.0217761	0.0356769	0.0223991	0.0467135	0.0266174	#N/A	#N/A	#N/A
Chr14_8460735_8474339	Pig.05792	16.578	4.0512	0.0222769	0.159671	yes	up	0	0	0	0.0580697	0.0570831	0.104529	0	0.0732273	ZNRF3-203	E3 ubiquitin-protein ligase ZNRF3 isoform X1 [Sus scrofa]	XP_020929414.1
Chr14_90028374_90037704	Pig.02027	3.06316	1.61502	0.0182558	0.138913	yes	up	0	0.012961	0.0400059	0.188727	0.171249	0.209058	0.0176556	0.189678	UBE2D1-203	NR:NA	NP_003329.1
Chr14_90124579_90137727	Pig.02025	4.01492	2.00537	0.0215011	0.155754	yes	up	0.0204118	0.012961	0.0333383	0.384712	0.206926	0.32852	0.022237	0.306719	IPMK-201	inositol polyphosphate multikinase isoform X2 [Sus scrofa]	XP_020928881.1
Chr14_96746892_96750576	Pig.02015	32.8693	5.03867	0.0185981	0.140338	yes	up	0	0	0	0.0943633	0.206926	0.141861	0	0.147717	LOC101146782	neutral ceramidase [Sus scrofa]	XP_005671307.1
Chr14_97552461_97562490	Pig.02009,MSTRG.35312	19.7837	4.30624	0.00572677	0.0600726	yes	up	0	0	0	0.0435523	0.0856247	0.134395	0	0.0878572	#N/A	#N/A	#N/A
Chr15_105753393_105754047	Pig.00040	43.6434	5.44769	0.0114439	0.100905	yes	up	0	0	0	0.137916	0.328228	0.126928	0	0.197691	AOX1-204	aldehyde oxidase [Sus scrofa]	NP_001295402.1
Chr15_106639220_106644084	MSTRG.37193,Pig.00025	15.5387	3.9578	0.0160455	0.128099	yes	up	0	0	0	0.0653284	0.0428123	0.0970628	0	0.0684012	#N/A	#N/A	#N/A
Chr15_107692551_107693830	Pig.00015	0.454404	-1.13795	0.0402949	0.231656	yes	down	0.108863	0.174973	0.220033	0.297607	0.378176	0.186659	0.167956	0.287481	BMPR2-201	bone morphogenetic protein receptor type-2 precursor [Sus scrofa]	NP_001191829.1
Chr15_107798196_107811074	Pig.00014	2.63384	1.39717	0.0470927	0.251084	yes	up	0.0476275	0.012961	0.0533413	0.28309	0.363905	0.365852	0.0379766	0.337616	FAM117B-201	protein FAM117B isoform X1 [Sus scrofa]	XP_003133638.2
Chr15_107798196_107838768	Pig.00014	37.1606	5.2157	0.00101528	0.0153222	yes	up	0	0	0	0.174209	0.221197	0.104529	0	0.166645	FAM117B-201	protein FAM117B isoform X1 [Sus scrofa]	XP_003133638.2
Chr15_107979484_107995904		19.428	4.28007	0.00333004	0.0402046	yes	up	0	0	0	0.0871046	0.0499477	0.119462	0	0.0855047	#N/A	#N/A	#N/A
Chr15_108264500_108302818	Pig.00009	0.0179228	-5.80206	0.0404629	0.2321	yes	down	0.0204118	0.0194414	0.020003	0	0	0	0.0199521	0	CYP20A1-202	cytochrome P450, family 20, subfamily A, polypeptide 1 [Sus scrofa]	NP_001302738.1
Chr15_108430554_108445898	Pig.00008	0.0678687	-3.88111	4.3454e-06	0.000167437	yes	down	0.136079	0.155531	0.106683	0.0435523	0	0.059731	0.132764	0.0344278	ABI2-201	PREDICTED: abl interactor 2 isoform X1 [Chinchilla lanigera]	XP_020930983.1
Chr15_108518521_108523889	Pig.00007	2.01825	1.0131	0.030997	0.196858	yes	up	0.115667	0.0712853	0.0866795	0.493593	0.82057	0.671974	0.0912106	0.662045	RAPH1	LOW QUALITY PROTEIN: ras-associated and pleckstrin homology domains-containing protein 1 [Sus scrofa]	XP_020930982.1
Chr15_111010850_111013729	Pig.11694	2.4693	1.3041	0.0350423	0.211053	yes	up	0.0612354	0.0518438	0.0466736	0.45004	0.577967	0.425583	0.0532509	0.48453	INO80D-201	INO80 complex subunit D isoform X1 [Sus scrofa]	XP_020931699.1
Chr15_114471451_114507975	Pig.11726	5.62538	2.49195	0.0394937	0.228508	yes	up	0	0	0.0133353	0.130657	0.0428123	0.0821301	0.0044451	0.0851998	KANSL1L-201	LOW QUALITY PROTEIN: KAT8 regulatory NSL complex subunit 1-like protein [Sus scrofa]	XP_005672211.2
Chr15_114503744_114533637	MSTRG.37316,Pig.11726	2.00484	1.00349	0.0384637	0.224703	yes	up	0.0544315	0.0259219	0.0400059	0.246796	0.349634	0.253857	0.0401198	0.283429	#N/A	#N/A	#N/A
Chr15_114987303_114993898	Pig.11732	21.4653	4.42393	0.0287771	0.187032	yes	up	0	0	0	0.0362936	0.0356769	0.209058	0	0.0936763	CPS1-201	LOW QUALITY PROTEIN: carbamoyl-phosphate synthase [ammonia]	XP_005672216.2
Chr15_119454916_119461643	MSTRG.37367,Pig.13892	12.0011	3.5851	0.0122288	0.104959	yes	up	0	0	0.0133353	0.181468	0.178385	0.179193	0.0044451	0.179682	#N/A	#N/A	#N/A
Chr15_120053313_120060412	Pig.13890	4.7095	2.23557	0.014919	0.121158	yes	up	0.0136079	0.012961	0.0266706	0.333901	0.328228	0.223991	0.0177465	0.295373	PECR-201	peroxisomal trans-2-enoyl-CoA reductase [Sus scrofa]	XP_020930776.1
Chr15_120101001_120144708	Pig.13888	0.291004	-1.78089	0.0164817	0.130265	yes	down	0.142883	0.0648048	0.0533413	0.0725871	0.128437	0.0746637	0.0870096	0.091896	XRCC5-201	X-ray repair cross-complementing protein 5 isoform X1 [Sus scrofa]	XP_003133697.3
Chr15_120570504_120570627		0.00162019	-9.26962	2.63154e-08	1.88121e-06	yes	down	0.108863	0.27218	0.240036	0	0	0	0.207026	0	#N/A	#N/A	#N/A
Chr15_121759101_121761784	Pig.14206	13.8367	3.79043	0.042464	0.238071	yes	up	0	0	0	0.0290349	0.0499477	0.104529	0	0.0611706	TNS1-207	PREDICTED: tensin-1 isoform X1 [Orcinus orca]	XP_020735031.1
Chr15_126481847_126499441		23.6363	4.56293	0.00622855	0.0634891	yes	up	0	0	0	0.152433	0.0784893	0.0821301	0	0.104351	#N/A	#N/A	#N/A
Chr15_134979093_134991193		8.6127	3.10647	0.0433137	0.240126	yes	up	0	0	0	0.0290349	0.0570831	0.0298655	0	0.0386612	#N/A	#N/A	#N/A
Chr15_137528982_137537891		0.351239	-1.50947	0.0301915	0.192977	yes	down	0.149687	0.0453634	0.133353	0.188727	0.164114	0.0373319	0.109468	0.130057	#N/A	#N/A	#N/A
Chr15_16010287_16016140	Pig.04255	0.0139301	-6.16565	0.00383987	0.0443634	yes	down	0.0136079	0.0324024	0.0266706	0	0	0	0.024227	0	DARS-201	aspartate--tRNA ligase, cytoplasmic isoform X1 [Sus scrofa]	XP_003133314.1
Chr15_16010287_16025505	Pig.04255	0.29856	-1.74391	0.0494488	0.258571	yes	down	0.0680393	0.0324024	0.0133353	0.0217761	0.0428123	0.059731	0.0379257	0.0414398	DARS-201	aspartate--tRNA ligase, cytoplasmic isoform X1 [Sus scrofa]	XP_003133314.1
Chr15_25222238_25299620		0.0303316	-5.04304	0.000149487	0.00318496	yes	down	1.5581	1.25721	1.54023	0.16695	0.121302	0.194126	1.45185	0.160793	#N/A	#N/A	#N/A
Chr15_25537906_25552485		8.42543	3.07475	0.00791539	0.0769308	yes	up	0	0	0.0466736	0.479075	0.399582	0.358386	0.0155579	0.412348	#N/A	#N/A	#N/A
Chr15_32024135_32060812	Pig.08949	0.0315814	-4.98478	3.78809e-07	2.03769e-05	yes	down	0.115667	0.0972072	0.173359	0.0290349	0.0142708	0	0.128744	0.0144352	PTPN4-201	band 4.1-like protein 5 isoform X1 [Sus scrofa]	KQK84396.1
Chr15_3699761_3737333	Pig.04234	0.0547522	-4.19094	0.00304729	0.0377128	yes	down	0.102059	0.0583243	0.100015	0.0290349	0.0214062	0	0.0867994	0.0168137	MBD5-201	methyl-CpG-binding domain protein 5 isoform X1 [Sus scrofa]	XP_020931757.1
Chr15_3729489_3737333	Pig.04234	0.0138554	-6.17341	0.010528	0.0950147	yes	down	0.0476275	0.0194414	0.0133353	0	0	0	0.0268014	0	MBD5-201	methyl-CpG-binding domain protein 5 isoform X1 [Sus scrofa]	XP_020931757.1
Chr15_3734521_3737333	Pig.04234	0.0236148	-5.40416	0.0028531	0.0357575	yes	down	0.0816472	0.0194414	0.0800119	0	0.0142708	0	0.0603668	0.00475693	MBD5-201	methyl-CpG-binding domain protein 5 isoform X1 [Sus scrofa]	XP_020931757.1
Chr15_4198970_4212638		0.405401	-1.30258	0.0441991	0.243744	yes	down	0.0680393	0.0388829	0.0666766	0.101622	0.0784893	0.0671974	0.0578663	0.0824362	#N/A	#N/A	#N/A
Chr15_47627270_47642540	Pig.02696	9.53763	3.25363	0.0168222	0.132457	yes	up	0.0136079	0	0	0.137916	0.107031	0.194126	0.00453596	0.146357	SORBS2-201	sorbin and SH3 domain-containing protein 2 isoform X20 [Sus scrofa]	XP_005671789.1
Chr15_49079022_49080493	Pig.02682,MSTRG.36454	0.229186	-2.12541	0.0186802	0.140567	yes	down	0.0204118	0.0324024	0.0400059	0.0290349	0.0499477	0	0.03094	0.0263275	#N/A	#N/A	#N/A
Chr15_53288260_53291281	Pig.02654	10.5763	3.40277	0.0462248	0.247916	yes	up	0	0	0	0.0290349	0.0285416	0.0821301	0	0.0465688	FUT11-201	alpha-(1,3)-fucosyltransferase 10 isoform X1 [Sus scrofa]	XP_020937441.1(alpha-
Chr15_53288260_53327464		0.0240122	-5.38009	0.00213918	0.028416	yes	down	0.0136079	0	0.0400059	0	0	0	0.0178713	0	#N/A	#N/A	#N/A
Chr15_55229766_55237802		4.31333	2.1088	0.0201331	0.149023	yes	up	0	0.012961	0.020003	0.137916	0.199791	0.179193	0.010988	0.1723	#N/A	#N/A	#N/A
Chr15_55572130_55590845	Pig.02646	3.91814	1.97017	0.00652329	0.0658755	yes	up	0.0204118	0.0518438	0.020003	0.34116	0.656456	0.447982	0.0307529	0.481866	GSR-201	glutathione reductase, mitochondrial [Sus scrofa]	XP_003483683.2
Chr15_55576898_55590845	Pig.02646	7.00938	2.80929	0.00340918	0.040805	yes	up	0.0204118	0.0194414	0	0.391971	0.321093	0.35092	0.0132844	0.354661	GSR-201	glutathione reductase, mitochondrial [Sus scrofa]	XP_003483683.2
Chr15_55584849_55590845	Pig.02646	4.55759	2.18827	0.0231735	0.163565	yes	up	0.0204118	0.012961	0.020003	0.312125	0.271145	0.276256	0.0177919	0.286508	GSR-201	glutathione reductase, mitochondrial [Sus scrofa]	XP_003483683.2
Chr15_66087214_66104895	Pig.00251	11.3672	3.50681	0.00201211	0.0272613	yes	up	0	0	0.020003	0.22502	0.342499	0.201592	0.00666766	0.25637	ACVR1-202	PREDICTED: activin receptor type-1 isoform X1 [Pteropus alecto]	XP_023398704.1
Chr15_66087214_66141239	Pig.00251	48.8274	5.60962	0.00489508	0.0538874	yes	up	0	0	0	0.145174	0.271145	0.238924	0	0.218414	ACVR1-202	PREDICTED: activin receptor type-1 isoform X1 [Pteropus alecto]	XP_023398704.1
Chr15_66099298_66104895	Pig.00251	16.6838	4.06038	0.00423473	0.0485386	yes	up	0.0136079	0	0	0.232279	0.264009	0.276256	0.00453596	0.257515	ACVR1-202	PREDICTED: activin receptor type-1 isoform X1 [Pteropus alecto]	XP_023398704.1
Chr15_66099298_66122813	Pig.00251	5.34228	2.41745	3.19649e-05	0.000895182	yes	up	0.0204118	0.0194414	0.0466736	0.515369	0.64932	0.462915	0.0288423	0.542535	ACVR1-202	PREDICTED: activin receptor type-1 isoform X1 [Pteropus alecto]	XP_023398704.1
Chr15_66099298_66141239	Pig.00251	53.1056	5.73079	4.56735e-05	0.00120458	yes	up	0	0	0	0.261314	0.27828	0.171727	0	0.237107	ACVR1-202	PREDICTED: activin receptor type-1 isoform X1 [Pteropus alecto]	XP_023398704.1
Chr15_66111291_66141239	Pig.00251	41.6488	5.3802	0.0235875	0.165569	yes	up	0	0	0	0.130657	0.242603	0.186659	0	0.18664	ACVR1-202	PREDICTED: activin receptor type-1 isoform X1 [Pteropus alecto]	XP_023398704.1
Chr15_67309404_67355080	Pig.00246	7.89758	2.98141	0.00310047	0.0381105	yes	up	0.0136079	0	0.0133353	0.210503	0.242603	0.261323	0.00898106	0.238143	TANC1-202	protein TANC1 isoform X1 [Sus scrofa]	XP_020930418.1
Chr15_67531340_67539348	Pig.00245	15.6245	3.96573	0.00922468	0.0849452	yes	up	0	0	0	0.0798458	0.0927601	0.0373319	0	0.0699793	WDSUB1-201	WD repeat, SAM and U-box domain-containing protein 1 isoform X1 [Sus scrofa]	XP_020930441.1
Chr15_67621405_67628331	Pig.00244	0.335638	-1.57502	0.000140349	0.00307467	yes	down	0.210922	0.110168	0.320048	0.181468	0.264009	0.291189	0.213713	0.245555	BAZ2B-201	PREDICTED: bromodomain adjacent to zinc finger domain protein 2B isoform X4 [Ceratotherium simum simum]	XP_020930417.1
Chr15_6770057_6775241		0.00408289	-7.93619	3.74943e-05	0.00101853	yes	down	0.0340197	0.0194414	0.266706	0	0	0	0.106722	0	#N/A	#N/A	#N/A
Chr15_72574920_72578797	MSTRG.36725	28.5172	4.83376	0.00204449	0.0276311	yes	up	0.0340197	0	0	1.15414	1.13453	0.866099	0.0113399	1.05159	0	0	XP_008972652.2
Chr15_72574920_72611569	MSTRG.36725	12.8348	3.68198	0.00106406	0.0159257	yes	up	0.0204118	0	0	0.268572	0.328228	0.291189	0.00680393	0.295996	0	0	XP_008972652.2
Chr15_76012998_76035026	Pig.00205	0.0532226	-4.23182	0.0170599	0.133554	yes	down	0.0272157	0.0324024	0.0466736	0	0.0214062	0	0.0354306	0.00713539	STK39-201	STE20/SPS1-related proline-alanine-rich protein kinase [Sus scrofa]	XP_003133502.3
Chr15_77526292_77541510	Pig.00190	9.15168	3.19404	0.0211107	0.153746	yes	up	0	0	0	0.0290349	0.0642185	0.0298655	0	0.0410396	UBR3-203	LOW QUALITY PROTEIN: E3 ubiquitin-protein ligase UBR3 [Sus scrofa]	XP_020932162.1
Chr15_7854591_7857607		0.225934	-2.14602	0.00847406	0.0797913	yes	down	0.0340197	0.0324024	0.0800119	0.0435523	0.0499477	0.0223991	0.0488113	0.038633	#N/A	#N/A	#N/A
Chr15_78573219_78637426	Pig.00183	3.51781	1.81468	0.0131462	0.110052	yes	up	0.0408236	0.012961	0	0.22502	0.221197	0.223991	0.0179282	0.223403	TLK1-201	serine/threonine-protein kinase tousled-like 1 isoform X1 [Sus scrofa]	XP_001927925.1
Chr15_78603808_78637426	Pig.00183	2.25078	1.17043	0.00176946	0.0246021	yes	up	0.244942	0.181453	0.273374	1.77113	2.13348	1.74713	0.233256	1.88391	TLK1-201	serine/threonine-protein kinase tousled-like 1 isoform X1 [Sus scrofa]	XP_001927925.1
Chr15_78604943_78637426	Pig.00183	2.91155	1.54179	5.82453e-06	0.000216744	yes	up	0.347001	0.174973	0.240036	2.17761	2.96832	2.73269	0.254003	2.62621	TLK1-201	serine/threonine-protein kinase tousled-like 1 isoform X1 [Sus scrofa]	XP_001927925.1
Chr15_81891325_81892099	Pig.00161	0.141804	-2.81803	0.0375838	0.220749	yes	down	0.0340197	0.0259219	0.0600089	0	0.0142708	0.0447982	0.0399835	0.0196897	WIPF1	WAS/WASL-interacting protein family member 1 [Sus scrofa]	XP_013846045.2
Chr15_862299_892728	Pig.04215	0.03448	-4.85809	0.0125965	0.1066	yes	down	0.0816472	0.0194414	0.0266706	0	0	0.0149327	0.0425864	0.00497758	RIF1-201	telomere-associated protein RIF1 isoform X1 [Sus scrofa]	XP_003359765.2
Chr15_88804975_88805439	Pig.00119	99.4898	6.63648	1.93085e-06	8.13204e-05	yes	up	0	0	0	0.399229	0.506613	0.425583	0	0.443808	ITPRID2-202	sperm-specific antigen 2 isoform X1 [Sus scrofa]	XP_020931795.1
Chr15_95030211_95032207	MSTRG.37007,Pig.00100	0.00248997	-8.64966	1.34028e-05	0.000446731	yes	down	0.149687	0.168492	0.0866795	0	0	0	0.134953	0	#N/A	#N/A	#N/A
Chr15_95034944_95036786	MSTRG.37007,Pig.00100	0.00164931	-9.24392	0.0399498	0.230411	yes	down	0.19051	0.27218	0.133353	0	0	0	0.198681	0	#N/A	#N/A	#N/A
Chr16_15371403_15432891	Pig.04581	0.00541078	-7.52995	0.000122569	0.00272916	yes	down	0.15649	0	0.0866795	0	0	0	0.0810567	0	EBF1-201	transcription factor COE1 [Bos taurus]	NP_001179845.1
Chr16_16615639_16616604		0.127484	-2.97161	0.0247141	0.169937	yes	down	0.0272157	0.0388829	0.020003	0.0290349	0.0142708	0	0.0287005	0.0144352	#N/A	#N/A	#N/A
Chr16_32614258_32623132	Pig.01123	28.6504	4.84048	0.0340969	0.209084	yes	up	0	0	0	0.0798458	0.171249	0.134395	0	0.128497	OCLN-201	occludin isoform X1 [Sus scrofa]	XP_005672578.1
Chr16_32642418_32651383		34.0291	5.0887	0.0116089	0.100914	yes	up	0	0	0	0.181468	0.18552	0.0895965	0	0.152195	#N/A	#N/A	#N/A
Chr16_35775308_35787304	Pig.01140	10.9728	3.45586	0.0280684	0.183951	yes	up	0	0	0	0.0798458	0.0356769	0.0298655	0	0.0484628	ERBIN-201	erbin isoform X1 [Sus scrofa]	XP_020932447.1
Chr16_40041687_40043781	Pig.01158	4.53045	2.17965	0.0456938	0.246728	yes	up	0.0340197	0	0.0133353	0.137916	0.264009	0.298655	0.015785	0.233527	ZSWIM5-201	zinc finger SWIM domain-containing protein 6 [Sus scrofa]	XP_020932632.1
Chr16_40041687_40063130	Pig.01158	5.81272	2.53921	0.000144956	0.00312586	yes	up	0.0272157	0	0.0933472	0.798458	0.834841	0.619709	0.0401876	0.751003	ZSWIM5-201	zinc finger SWIM domain-containing protein 6 [Sus scrofa]	XP_020932632.1
Chr16_43988195_43991098	Pig.01172	11.1471	3.4786	0.00327194	0.0396795	yes	up	0.0136079	0	0.0133353	0.304866	0.342499	0.343453	0.00898106	0.330273	GPBP1-202	vasculin isoform X1 [Sus scrofa]	XP_005672522.1
Chr16_45446435_45470707	Pig.01182	0.265387	-1.91383	0.00453432	0.0510041	yes	down	0.15649	0.0324024	0.0800119	0.0943633	0.0784893	0.0671974	0.0896349	0.0800166	SLC38A9-201	sodium-coupled neutral amino acid transporter 9 isoform X1 [Sus scrofa]	XP_003134026.2
Chr16_45583762_45616147	Pig.01183,MSTRG.38422	2.66143	1.4122	0.034447	0.209882	yes	up	0.0680393	0.0518438	0.0333383	0.457299	0.485206	0.567444	0.0510738	0.503317	#N/A	#N/A	#N/A
Chr16_49843472_49865201	Pig.01206	23.8038	4.57312	0.0246865	0.169937	yes	up	0	0	0	0.0871046	0.135572	0.0970628	0	0.10658	PARP8-203	poly [ADP-ribose]	XP_020932405.1
Chr16_53671468_53694230	Pig.01244,MSTRG.38604	0.0012073	-9.694	1.21418e-12	2.99848e-10	yes	down	0.38102	0.162012	0.440065	0	0	0	0.327699	0	#N/A	#N/A	#N/A
Chr16_53671468_53741947	Pig.01244,MSTRG.38604	0.00202522	-8.9477	4.79541e-09	4.13547e-07	yes	down	0.163294	0.110168	0.306712	0	0	0	0.193392	0	#N/A	#N/A	#N/A
Chr16_53729322_53741947	Pig.01244,MSTRG.38604	0.0115596	-6.43477	1.6316e-08	1.26635e-06	yes	down	0.0884511	0.0712853	0.206697	0.0145174	0	0	0.122145	0.00483914	#N/A	#N/A	#N/A
Chr16_53729322_53776448	Pig.01244,MSTRG.38604	0.0136187	-6.19826	0.000721281	0.0115596	yes	down	0.0204118	0.0259219	0.0333383	0	0	0	0.0265573	0	#N/A	#N/A	#N/A
Chr16_53729322_53794721	MSTRG.38604	0.00717773	-7.12226	0.00775389	0.0760331	yes	down	0.0204118	0.0388829	0.100015	0	0	0	0.0531032	0	0	0	NP_999103.1
Chr16_54701604_54707029		0.20993	-2.25202	0.0135197	0.112141	yes	down	0.0408236	0.0453634	0.0533413	0.0653284	0.0428123	0	0.0465094	0.0360469	#N/A	#N/A	#N/A
Chr16_55719838_55728887		0.0633231	-3.98112	0.012132	0.10479	yes	down	0.0612354	0.0388829	0.0266706	0.0145174	0	0.0149327	0.042263	0.00981672	#N/A	#N/A	#N/A
Chr16_56515608_56520512	Pig.01261	0.46734	-1.09746	0.00466312	0.0519154	yes	down	0.15649	0.0583243	0.11335	0.188727	0.164114	0.179193	0.109388	0.177344	LIFR-205	PREDICTED: leukemia inhibitory factor receptor [Lipotes vexillifer]	XP_007192247.1
Chr16_56515608_56558089	Pig.01261	0.271394	-1.88154	0.00376828	0.0436526	yes	down	0.0680393	0.0583243	0.0400059	0.0653284	0.0570831	0.0447982	0.0554565	0.0557366	LIFR-205	PREDICTED: leukemia inhibitory factor receptor [Lipotes vexillifer]	XP_007192247.1
Chr16_56704855_56725231	Pig.01262	0.0179526	-5.79966	0.00214977	0.0284871	yes	down	0.0272157	0.0194414	0.0133353	0	0	0	0.0199975	0	EGFLAM-201	PREDICTED: pikachurin isoform X2 [Vicugna pacos]	XP_006207734.1
Chr16_58703341_58706692	Pig.16455	11.9022	3.57316	5.76872e-10	6.66839e-08	yes	up	0.0544315	0	0.0133353	0.936374	1.04177	0.769036	0.0225889	0.915726	Nadk2	NAD kinase 2, mitochondrial isoform X1 [Sus scrofa]	XP_003359802.2
Chr16_58703341_58719462	Pig.16455	39.2384	5.29419	2.03251e-06	8.4295e-05	yes	up	0	0	0.0133353	0.667802	0.63505	0.51518	0.0044451	0.60601	Nadk2	NAD kinase 2, mitochondrial isoform X1 [Sus scrofa]	XP_003359802.2
Chr16_58703341_58724322	Pig.16455	14.1515	3.82288	6.24611e-05	0.00156275	yes	up	0.0272157	0	0	0.435523	0.55656	0.321054	0.00907191	0.437712	Nadk2	NAD kinase 2, mitochondrial isoform X1 [Sus scrofa]	XP_003359802.2
Chr16_60541346_60541707	MSTRG.38732	0.0851128	-3.55448	3.16626e-09	2.96591e-07	yes	down	0.251746	0.0842462	0.34005	0.0580697	0.0499477	0.0821301	0.225347	0.0633825	0	0	XP_020932639.1
Chr16_6314192_6328803	Pig.22500	0.0392668	-4.67055	0.0258901	0.175254	yes	down	0.0204118	0.0388829	0.0400059	0	0	0.0149327	0.0331002	0.00497758	SLC12A7-201	solute carrier family 12 member 7 isoform X1 [Sus scrofa]	XP_020932792.1
Chr16_7578884_7588861		29.5416	4.88467	0.00771903	0.0759737	yes	up	0	0	0	0.101622	0.192656	0.104529	0	0.132936	#N/A	#N/A	#N/A
Chr16_7674073_7680254	Pig.12551	2.80979	1.49046	0.0223836	0.160224	yes	up	0.0612354	0	0.0933472	0.515369	0.428123	0.440516	0.0515275	0.461336	MARCH6-201	PREDICTED: E3 ubiquitin-protein ligase MARCH6 isoform X5 [Homo sapiens]	XP_026362479.1
Chr16_8421206_8421847	Pig.12537	0.00446222	-7.80802	0.0172163	0.133942	yes	down	0.0952551	0.0518438	0.11335	0	0	0	0.0868164	0	SPARC-203	SPARC precursor [Sus scrofa]	NP_001026964.1
Chr17_12099933_12151084	Pig.13480	75.0396	6.22958	7.87896e-06	0.000282407	yes	up	0	0	0	0.312125	0.378176	0.313588	0	0.334629	PSD3-201	PREDICTED: PH and SEC7 domain-containing protein 3 isoform X3 [Ovis aries musimon]	XP_020933648.1
Chr17_12219923_12224684	Pig.13480	9.68896	3.27634	3.6607e-10	4.62525e-08	yes	up	0.0476275	0.0648048	0.0266706	1.56062	1.77671	1.76953	0.0463677	1.70229	PSD3-201	PREDICTED: PH and SEC7 domain-containing protein 3 isoform X3 [Ovis aries musimon]	XP_020933648.1
Chr17_12219923_12243444	Pig.13480	7.56996	2.92029	5.79269e-11	1.01521e-08	yes	up	0.102059	0.142571	0.0733442	2.75105	3.73894	2.85215	0.105991	3.11405	PSD3-201	PREDICTED: PH and SEC7 domain-containing protein 3 isoform X3 [Ovis aries musimon]	XP_020933648.1
Chr17_12953690_12957546	Pig.13489	25.3035	4.66126	0.0201723	0.14911	yes	up	0	0	0	0.0653284	0.221197	0.059731	0	0.115419	CRLS1-201	LOW QUALITY PROTEIN: cardiolipin synthase (CMP-forming) [Sus scrofa]	XP_003134291.4
Chr17_22456834_22464647	Pig.08668	7.13416	2.83474	0.0444078	0.243744	yes	up	0.0136079	0	0	0.108881	0.149843	0.0746637	0.00453596	0.111129	KIF16B	kinesin-like protein KIF16B isoform X7 [Sus scrofa]	XP_020933706.1
Chr17_27497785_27500088		104.585	6.70853	1.78712e-05	0.000554825	yes	up	0	0	0	0.413747	0.285416	0.67944	0	0.459534	#N/A	#N/A	#N/A
Chr17_29680667_29696063	Pig.09491	25.8634	4.69284	0.00240915	0.0307975	yes	up	0	0	0	0.123398	0.0927601	0.126928	0	0.114362	ATRN-201	attractin isoform X1 [Sus scrofa]	XP_001927324.7
Chr17_30226777_30248333	Pig.09479	0.0203039	-5.6221	0.0114538	0.100905	yes	down	0	0	0.0666766	0	0	0	0.0222255	0	PTPRA-205	receptor-type tyrosine-protein phosphatase alpha isoform X2 [Sus scrofa]	XP_020932895.1
Chr17_34930916_34945628	Pig.11892	0.42982	-1.21819	0.0271619	0.181513	yes	down	0.0748433	0.0842462	0.0333383	0.0871046	0.0856247	0.141861	0.0641426	0.104863	CBFA2T2-201	protein CBFA2T2 isoform X1 [Sus scrofa]	XP_020933765.1
Chr17_36957879_36963159		0.223964	-2.15866	0.000332952	0.00604993	yes	down	0.122471	0.0972072	0.106683	0.0943633	0.114166	0.059731	0.108787	0.0894202	#N/A	#N/A	#N/A
Chr17_4265658_4269739	Pig.08648	22.15	4.46924	0.0163378	0.129392	yes	up	0	0	0	0.116139	0.121302	0.059731	0	0.0990573	SLC7A2-201	cationic amino acid transporter 2 isoform X1 [Sus scrofa]	XP_020932806.1
Chr17_4560664_4563512	Pig.08645	38.5337	5.26805	0.000218198	0.0043108	yes	up	0	0	0	0.217761	0.128437	0.16426	0	0.170153	FGL1-201	fibrinogen-like protein 1 [Sus scrofa]	XP_020933611.1
Chr17_47381327_47383871	Pig.14975	0.144952	-2.78635	2.50987e-08	1.83934e-06	yes	down	0.210922	0.220336	0.293377	0.0798458	0.149843	0.156794	0.241545	0.128828	ZMYND8-204	LOW QUALITY PROTEIN: protein kinase C-binding protein 1 [Sus scrofa]	XP_020933698.1
Chr17_49081289_49083160	Pig.14984	0.494861	-1.01491	0.0443314	0.243744	yes	down	0.204118	0.103688	0.153356	0.268572	0.228332	0.306121	0.153721	0.267675	ZNFX1-201	NFX1-type zinc finger-containing protein 1 [Sus scrofa]	XP_020933177.1
Chr17_49185401_49188054		0.0112473	-6.47427	2.42126e-05	0.000712756	yes	down	0.0340197	0.0259219	0.0400059	0	0	0	0.0333158	0	#N/A	#N/A	#N/A
Chr17_50921162_50925049	Pig.09982	0.268313	-1.89801	0.0231002	0.163416	yes	down	0.0408236	0.012961	0.0666766	0.0217761	0.0570831	0.0298655	0.0401537	0.0362416	NFATC2-201	nuclear factor of activated T-cells, cytoplasmic 2 isoform X1 [Sus scrofa]	XP_005673069.1
Chr17_51000006_51005921	Pig.09982	0.194762	-2.36022	0.000273685	0.00524365	yes	down	0.0816472	0.0777657	0.0733442	0.0725871	0.0499477	0.0447982	0.0775857	0.0557777	NFATC2-201	nuclear factor of activated T-cells, cytoplasmic 2 isoform X1 [Sus scrofa]	XP_005673069.1
Chr17_52517980_52520929	Pig.09995	0.130396	-2.93903	0.00385566	0.0443809	yes	down	0.0612354	0.12961	0.100015	0.0362936	0.0713539	0.0447982	0.0969533	0.0508152	TSHZ1-202	teashirt homolog 2 [Sus scrofa]	NP_001108146.1
Chr17_52517980_52521056		0.133927	-2.90049	1.32199e-05	0.000443356	yes	down	0.170098	0.27218	0.206697	0.16695	0.107031	0.0671974	0.216325	0.113726	#N/A	#N/A	#N/A
Chr17_56923481_56931936		10.1022	3.3366	3.34618e-05	0.00092754	yes	up	0	0.012961	0.0266706	0.333901	0.563696	0.537579	0.0132105	0.478392	#N/A	#N/A	#N/A
Chr17_7571166_7574449		0.0167185	-5.90242	1.37686e-09	1.46676e-07	yes	down	0.278961	0.324024	0.326715	0.0580697	0	0	0.3099	0.0193566	#N/A	#N/A	#N/A
Chr18_10736400_10765303	Pig.17902	4.31516	2.10941	0.0293763	0.189325	yes	up	0.0204118	0	0.0133353	0.174209	0.114166	0.194126	0.011249	0.160834	FMC1-LUC7L2-201	putative RNA-binding protein Luc7-like 2 isoform X2 [Sus scrofa]	XP_013846229.1
Chr18_11837452_11867871	MSTRG.40295	94.5075	6.56236	7.55237e-07	3.76441e-05	yes	up	0	0	0	0.435523	0.478071	0.35092	0	0.421504	0	0	XP_020934349.1
Chr18_11844787_11867871	MSTRG.40295,Pig.01268	63.2896	5.9839	3.99182e-05	0.00107898	yes	up	0	0	0	0.188727	0.313957	0.343453	0	0.282046	#N/A	#N/A	#N/A
Chr18_11856641_11867871	MSTRG.40295,Pig.01268	537.541	9.07023	1.1426e-13	3.44874e-11	yes	up	0	0	0	1.74209	3.08249	2.39671	0	2.40709	#N/A	#N/A	#N/A
Chr18_1635118_1641276	MSTRG.40019	2.35564	1.23612	8.44365e-05	0.00197734	yes	up	0.210922	0.149051	0.246703	1.37916	1.76958	1.91886	0.202225	1.6892	0	0	XP_020934929.1
Chr18_17967186_18000378	Pig.01297	25.5908	4.67755	0.00431786	0.0491801	yes	up	0	0	0	0.123398	0.121302	0.0970628	0	0.113921	MKLN1-202	PREDICTED: muskelin isoform X3 [Ovis aries]	XP_004008122.1
Chr18_18270856_18323820	MSTRG.40398	15.6056	3.96399	0.00888279	0.0827791	yes	up	0	0	0.0133353	0.188727	0.264009	0.24639	0.0044451	0.233042	0	0	XP_020954391.1
Chr18_18270856_18358987	MSTRG.40398	97.9126	6.61342	8.23269e-06	0.000292341	yes	up	0	0	0	0.333901	0.392446	0.574911	0	0.433753	0	0	XP_020954391.1
Chr18_18299792_18358987	MSTRG.40398	21.2196	4.40732	0.031314	0.198055	yes	up	0	0	0	0	0.299686	0	0	0.0998955	0	0	XP_020954391.1
Chr18_2037034_2043252	Pig.15539	7.92526	2.98646	0.0125788	0.1066	yes	up	0.0136079	0	0.0133353	0.174209	0.335363	0.201592	0.00898106	0.237055	LMBR1-201	limb region 1 protein homolog isoform X1 [Sus scrofa]	XP_020934816.1
Chr18_20441281_20444735	Pig.01330	0.00934757	-6.74119	0.00604655	0.0623223	yes	down	0.0612354	0.0194414	0.0466736	0	0	0	0.0424501	0	FAM71F2-201	protein FAM71F2 isoform X2 [Sus scrofa]	XP_020934441.1
Chr18_2781902_2791211	Pig.15536	11.5118	3.52504	0.00835309	0.0789258	yes	up	0	0	0.0133353	0.174209	0.199791	0.149327	0.0044451	0.174442	Rbm33	LOW QUALITY PROTEIN: RNA-binding protein 33 [Sus scrofa]	XP_020934696.1
Chr18_2796580_2825012	Pig.15536	4.29614	2.10304	0.00226432	0.0294307	yes	up	0.0612354	0	0.0133353	0.457299	0.235468	0.365852	0.0248569	0.352873	Rbm33	LOW QUALITY PROTEIN: RNA-binding protein 33 [Sus scrofa]	XP_020934696.1
Chr18_2812373_2818304	Pig.15536	14.1792	3.82571	9.44433e-05	0.00218345	yes	up	0.0204118	0	0	0.275831	0.435259	0.283722	0.00680393	0.331604	Rbm33	LOW QUALITY PROTEIN: RNA-binding protein 33 [Sus scrofa]	XP_020934696.1
Chr18_2812373_2825012	Pig.15536	6.53465	2.70811	9.43726e-11	1.42424e-08	yes	up	0.0884511	0.0453634	0.0600089	1.2485	1.71249	1.52314	0.0646078	1.49471	Rbm33	LOW QUALITY PROTEIN: RNA-binding protein 33 [Sus scrofa]	XP_020934696.1
Chr18_31666003_31666275	Pig.01383	0.294903	-1.76169	0.000929272	0.0143684	yes	down	0.108863	0.0777657	0.180027	0.145174	0.142708	0.0895965	0.122218	0.125826	MDFIC-201	myoD family inhibitor domain-containing protein isoform X1 [Sus scrofa]	XP_003134810.3
Chr18_31666003_31703354	Pig.01383	0.181842	-2.45924	1.47055e-14	4.99342e-12	yes	down	0.530707	0.2657	0.566751	0.217761	0.385311	0.261323	0.454386	0.288132	MDFIC-201	myoD family inhibitor domain-containing protein isoform X1 [Sus scrofa]	XP_003134810.3
Chr18_34270406_34280336	MSTRG.40641,Pig.01392	2.59862	1.37775	0.00775424	0.0760331	yes	up	0.0476275	0.0194414	0.11335	0.631508	0.613643	0.335987	0.0601397	0.527046	#N/A	#N/A	#N/A
Chr18_38971782_38985420	Pig.07046	0.183089	-2.44938	0.000253977	0.00492806	yes	down	0.0476275	0.0194414	0.100015	0.0435523	0.0142708	0.0447982	0.0556946	0.0342071	HERPUD2-202	PREDICTED: homocysteine-responsive endoplasmic reticulum-resident ubiquitin-like domain member 2 protein [Canis lupus familiaris]	XP_020934290.1
Chr18_39482693_39491259	Pig.07049	54.2112	5.76052	0.000155308	0.00327051	yes	up	0	0	0	0.217761	0.292551	0.216525	0	0.242279	DPY19L2-201	probable C-mannosyltransferase DPY19L1 [Sus scrofa]	XP_020934968.1
Chr18_39482693_39521648	Pig.07049	5.36914	2.42469	0.0267081	0.178921	yes	up	0.0204118	0	0.020003	0.232279	0.356769	0.126928	0.0134716	0.238659	DPY19L2-201	probable C-mannosyltransferase DPY19L1 [Sus scrofa]	XP_020934968.1
Chr18_43306041_43341966		43.8632	5.45494	0.000360786	0.00646914	yes	up	0	0	0	0.174209	0.242603	0.171727	0	0.19618	#N/A	#N/A	#N/A
Chr18_44072031_44078588	Pig.07088	74.3678	6.21661	9.51933e-05	0.00219146	yes	up	0	0	0	0.319383	0.328228	0.343453	0	0.330355	CHN2	beta-chimaerin isoform X3 [Sus scrofa]	XP_003484098.1
Chr18_45570355_45584742	Pig.07094,MSTRG.40802	0.0694763	-3.84734	0.0325215	0.202393	yes	down	0.0204118	0.0194414	0.0133353	0	0.0142708	0	0.0177295	0.00475693	#N/A	#N/A	#N/A
Chr18_45729590_45744165	Pig.07095	4.84997	2.27798	7.72339e-11	1.27155e-08	yes	up	0.197314	0.220336	0.180027	2.61314	4.60946	3.71825	0.199226	3.64695	HIBADH-202	3-hydroxyisobutyrate dehydrogenase, mitochondrial [Sus scrofa]	XP_020934876.1
Chr18_45729590_45748565	Pig.07095	21.8413	4.44898	0.00824718	0.0788855	yes	up	0	0	0	0.0725871	0.164114	0.059731	0	0.0988107	HIBADH-202	3-hydroxyisobutyrate dehydrogenase, mitochondrial [Sus scrofa]	XP_020934876.1
Chr18_45729590_45754366	Pig.07095	25.2289	4.657	7.19721e-17	4.34472e-14	yes	up	0	0.0259219	0.0333383	1.45174	2.33327	1.63514	0.0197534	1.80672	HIBADH-202	3-hydroxyisobutyrate dehydrogenase, mitochondrial [Sus scrofa]	XP_020934876.1
Chr18_45729590_45763157	Pig.07095	41.295	5.3679	0.0021355	0.028416	yes	up	0	0	0	0.159692	0.214062	0.179193	0	0.184315	HIBADH-202	3-hydroxyisobutyrate dehydrogenase, mitochondrial [Sus scrofa]	XP_020934876.1
Chr18_45741454_45754366	Pig.07095	37.0341	5.21078	0.0129611	0.109344	yes	up	0	0	0	0.130657	0.242603	0.126928	0	0.166729	HIBADH-202	3-hydroxyisobutyrate dehydrogenase, mitochondrial [Sus scrofa]	XP_020934876.1
Chr18_48365250_48392464		9.12341	3.18957	0.0259727	0.17551	yes	up	0.0136079	0	0	0.174209	0.135572	0.111996	0.00453596	0.140592	#N/A	#N/A	#N/A
Chr18_49965466_49966837	Pig.15666	2.15094	1.10497	0.0325117	0.202393	yes	up	0.0680393	0.0777657	0.0800119	0.544404	0.63505	0.612243	0.0752723	0.597232	TNS3-201	tensin-3 isoform X4 [Sus scrofa]	XP_020935014.1
Chr18_5052801_5065237	Pig.13671	27.8055	4.7973	0.00339578	0.040805	yes	up	0	0	0	0.101622	0.135572	0.134395	0	0.123863	ACTR3B	actin-related protein 3B isoform X8 [Sus scrofa]	XP_020934961.1
Chr18_53579890_53620130		0.00670461	-7.22063	0.00372059	0.0433776	yes	down	0.0544315	0.0518438	0.0533413	0	0	0	0.0532055	0	#N/A	#N/A	#N/A
Chr18_53610429_53620130	Pig.15553	0.00607102	-7.36385	7.72162e-11	1.27155e-08	yes	down	0.217726	0.200895	0.233368	0.0145174	0	0	0.21733	0.00483914	GLI3-201	transcriptional activator GLI3 isoform X2 [Sus scrofa]	XP_020934602.1
Chr18_5421103_5454693	Pig.13668	2.95362	1.56248	0.0115693	0.100913	yes	up	0.0544315	0.0259219	0.0466736	0.486334	0.428123	0.395718	0.0423423	0.436725	KMT2C-201	histone-lysine N-methyltransferase 2C isoform X1 [Sus scrofa]	XP_020934780.1
Chr18_55221402_55260430	Pig.17674	20.6666	4.36923	0.0122911	0.105161	yes	up	0	0	0	0.0725871	0.107031	0.0970628	0	0.0922269	SUGCT-201	succinate--hydroxymethylglutarate CoA-transferase [Sus scrofa]	XP_020934311.1
Chr18_55221402_55264445	Pig.17674	3.24054	1.69623	0.0190086	0.142268	yes	up	0.0476275	0	0.0600089	0.312125	0.428123	0.388251	0.0358788	0.376166	SUGCT-201	succinate--hydroxymethylglutarate CoA-transferase [Sus scrofa]	XP_020934311.1
Chr18_55254219_55264445	Pig.17674	2.00447	1.00322	0.0237124	0.166018	yes	up	0.108863	0.174973	0.293377	1.32109	1.59833	1.29915	0.192404	1.40619	SUGCT-201	succinate--hydroxymethylglutarate CoA-transferase [Sus scrofa]	XP_020934311.1
Chr18_55387035_55397915	Pig.17676	0.455587	-1.1342	0.00511211	0.0553609	yes	down	0.836884	0.330504	0.400059	0.929115	0.856247	0.731705	0.522483	0.839022	CDK13-201	LOW QUALITY PROTEIN: cyclin-dependent kinase 13 [Sus scrofa]	XP_020934504.1
Chr18_5599235_5600944	Pig.13668	0.0871037	-3.52112	4.35244e-07	2.29581e-05	yes	down	0.122471	0.0777657	0.106683	0.0435523	0.0142708	0.0373319	0.102306	0.0317183	KMT2C-201	histone-lysine N-methyltransferase 2C isoform X1 [Sus scrofa]	XP_020934780.1
ChrX_110843981_110863166	Pig.04472	37.4227	5.22584	0.000526829	0.0087531	yes	up	0	0	0	0.174209	0.135572	0.186659	0	0.16548	MBNL3-201	muscleblind-like protein 3 isoform X1 [Sus scrofa]	XP_013841883.1
ChrX_114395060_114411461	Pig.08383	0.0620801	-4.00973	0.0224599	0.160348	yes	down	0.0204118	0	0.0533413	0	0.0142708	0	0.0245844	0.00475693	ARHGEF6-201	rho guanine nucleotide exchange factor 6 isoform X8 [Sus scrofa]	XP_020936217.1
ChrX_117725135_117726758	MSTRG.42462	0.0566481	-4.14183	1.23017e-20	1.67087e-17	yes	down	0.666786	0.576763	0.473404	0.0725871	0.18552	0.111996	0.572317	0.123368	0	0	TKC34226.1
ChrX_117725135_117785162	MSTRG.42462	0.00504703	-7.63035	2.25016e-05	0.000671711	yes	down	0.0544315	0.0972072	0.0400059	0	0	0	0.0638815	0	0	0	TKC34226.1
ChrX_123480676_123481521	Pig.18741	0.0197487	-5.6621	0.000115614	0.00258491	yes	down	0.0748433	0.116649	0.100015	0	0	0.0223991	0.0971689	0.00746637	AFF2-201	AF4/FMR2 family member 2 isoform X3 [Sus scrofa]	XP_013839468.1
ChrX_19618545_19624535	Pig.05967	0.0279846	-5.15922	0.0461073	0.24753	yes	down	0.0204118	0	0.0266706	0	0	0	0.0156941	0	CDKL5-201	cyclin-dependent kinase-like 5 isoform X1 [Sus scrofa]	XP_020936208.1
ChrX_21050389_21065144	Pig.01775	0.257189	-1.9591	0.00130825	0.0191068	yes	down	0.0884511	0.0324024	0.0866795	0.0362936	0.0570831	0.0895965	0.0691777	0.0609911	RPS6KA3-201	ribosomal protein S6 kinase alpha-3 isoform 1 [Mus musculus]	EDL40821.1
ChrX_24791587_24795340		2.34695	1.23079	0.000274102	0.00524365	yes	up	0.108863	0.0777657	0.120018	0.776682	0.956142	0.821301	0.102216	0.851375	#N/A	#N/A	#N/A
ChrX_32827680_32872783	Pig.01823	0.00682631	-7.19468	1.00362e-05	0.000349529	yes	down	0.108863	0.012961	0.0600089	0	0	0	0.0606109	0	DMD-205	dystrophin isoform X1 [Sus scrofa]	XP_020935207.1
ChrX_32984351_33033861	Pig.01823	0.0118626	-6.39743	0.000603488	0.00987576	yes	down	0.0340197	0.0259219	0.0333383	0	0	0	0.0310933	0	DMD-205	dystrophin isoform X1 [Sus scrofa]	XP_020935207.1
ChrX_45213981_45219005	MSTRG.41530	24.684	4.62551	0.00450788	0.0508118	yes	up	0	0	0	0.16695	0.0856247	0.0746637	0	0.10908	0	0	XP_020922221.1
ChrX_52315117_52332491	Pig.11763	0.00996401	-6.64906	0.000748951	0.0118978	yes	down	0.0408236	0	0.0933472	0	0	0	0.0447236	0	Arhgef9	rho guanine nucleotide exchange factor 9 isoform X1 [Sus scrofa]	XP_020936292.1
ChrX_56197879_56199968	Pig.11779	0.0894111	-3.4834	0.0108192	0.0963619	yes	down	0.0408236	0.0194414	0.0866795	0.0290349	0.0142708	0	0.0489815	0.0144352	OPHN1-201	oligophrenin-1 isoform X1 [Sus scrofa]	XP_020935958.1
ChrX_69088121_69130214	Pig.06669	13.6397	3.76974	0.00331954	0.0401672	yes	up	0	0.012961	0	0.297607	0.228332	0.179193	0.00432032	0.235044	RPS6KA6-201	ribosomal protein S6 kinase alpha-6 isoform X1 [Sus scrofa]	XP_005657901.1
ChrX_85946567_85954427		0.0059067	-7.40343	0.000856689	0.0134132	yes	down	0.0680393	0.0518438	0.0666766	0	0	0	0.0621866	0	#N/A	#N/A	#N/A
ChrX_92332569_92409828	Pig.02436	0.0596261	-4.06791	0.0374596	0.220258	yes	down	0.0204118	0	0	0	0	0	0.00680393	0	TMEM164-201	transmembrane protein 164 isoform X1 [Sus scrofa]	XP_020935660.1
Scaffold1086_19219_26311	Pig.21958	0.162008	-2.62586	0.0133219	0.111351	yes	down	0.0612354	0.0648048	0.0666766	0.0653284	0.0285416	0.0223991	0.0642389	0.0387564	ZMYM2-201	zinc finger MYM-type protein 2 isoform X1 [Sus scrofa]	XP_020921085.1
Scaffold109_2537105_2542457	MSTRG.42720,Pig.10028	0.228365	-2.13059	0.0321785	0.201181	yes	down	0	0.0259219	0.0333383	0	0.0285416	0.0223991	0.0197534	0.0169802	#N/A	#N/A	#N/A
Scaffold109_3251924_3252389	Pig.10031	6.99683	2.8067	0.000499516	0.00840207	yes	up	0.0136079	0.012961	0.0400059	0.34116	0.627914	0.649574	0.0221916	0.539549	OXNAD1-201	oxidoreductase NAD-binding domain-containing protein 1 isoform X1 [Sus scrofa]	XP_001925335.4
Scaffold109_3844407_3854262	MSTRG.42741,MSTRG.42740,Pig.10036	4.08545	2.03049	0.0357358	0.212886	yes	up	0.0340197	0	0.0133353	0.254055	0.178385	0.201592	0.015785	0.211344	#N/A	#N/A	#N/A
Scaffold117_1213266_1228785	Pig.10777	0.312978	-1.67587	0.0297492	0.190824	yes	down	0.0884511	0.0583243	0.0533413	0.0290349	0.0570831	0.141861	0.0667056	0.075993	RBMS3-201	RNA-binding motif, single-stranded-interacting protein 3 isoform X2 [Sus scrofa]	XP_020925630.1
Scaffold118_1738308_1756270	Pig.10801	0.117949	-3.08377	0.0336671	0.20762	yes	down	0.0272157	0.0259219	0.0133353	0	0	0.0298655	0.0221577	0.00995516	RUNX1T1-202	PREDICTED: protein CBFA2T1 isoform X2 [Otolemur garnettii]	XP_019480529.1
Scaffold118_1738308_1824084		0.0953092	-3.39124	0.0287794	0.187032	yes	down	0.0408236	0.0388829	0.0466736	0.0435523	0	0	0.0421267	0.0145174	#N/A	#N/A	#N/A
Scaffold118_1756089_1767690		0.00909734	-6.78034	0.000420423	0.00733557	yes	down	0.0408236	0.0453634	0.0266706	0	0	0	0.0376192	0	#N/A	#N/A	#N/A
Scaffold124_5105139_5107452	Pig.11268	0.00805933	-6.95512	1.63579e-05	0.00052278	yes	down	0.0204118	0.0583243	0.0466736	0	0	0	0.0418032	0	TET1-201	methylcytosine dioxygenase TET1 [Sus scrofa]	NP_001302701.1
Scaffold124_5105139_5113215	Pig.11268	0.0612939	-4.02811	8.71174e-05	0.00202269	yes	down	0.0884511	0.0388829	0.0333383	0	0.0356769	0	0.0535574	0.0118923	TET1-201	methylcytosine dioxygenase TET1 [Sus scrofa]	NP_001302701.1
Scaffold124_5184262_5197695	Pig.11269	0.443008	-1.17459	0.018213	0.138781	yes	down	0.115667	0.162012	0.180027	0.188727	0.264009	0.306121	0.152569	0.252952	CCAR1-205	cell division cycle and apoptosis regulator protein 1 isoform X2 [Sus scrofa]	XP_020928155.1
Scaffold124_5340659_5345201	Pig.11271	0.189594	-2.39902	0.0297977	0.190909	yes	down	0.0476275	0.0259219	0.0466736	0.0580697	0.0214062	0	0.0400743	0.026492	DDX50-201	ATP-dependent RNA helicase DDX50 isoform X2 [Sus scrofa]	XP_003133100.1
Scaffold1549_13083_15446		0.00412023	-7.92306	6.77898e-08	4.43737e-06	yes	down	0.0408236	0.123129	0.0733442	0	0	0	0.079099	0	#N/A	#N/A	#N/A
Scaffold155_4805140_4828350	Pig.12801	50.3557	5.65408	0.0066172	0.0665764	yes	up	0	0	0	0.203244	0.164114	0.298655	0	0.222004	ITGA9-201	integrin alpha-9 isoform X2 [Sus scrofa]	XP_020927318.1
Scaffold155_4811844_4813386	Pig.12801	59.9194	5.90495	0.000404497	0.00715841	yes	up	0	0	0	0.181468	0.249739	0.365852	0	0.265686	ITGA9-201	integrin alpha-9 isoform X2 [Sus scrofa]	XP_020927318.1
Scaffold155_4811844_4828350	Pig.12801	1057.35	10.0462	7.83943e-16	3.87196e-13	yes	up	0	0	0	3.81082	4.9805	5.32352	0	4.70495	ITGA9-201	integrin alpha-9 isoform X2 [Sus scrofa]	XP_020927318.1
Scaffold155_4811844_4846127	Pig.12801	47.4972	5.56977	0.000671234	0.0108536	yes	up	0	0	0	0.188727	0.221197	0.223991	0	0.211305	ITGA9-201	integrin alpha-9 isoform X2 [Sus scrofa]	XP_020927318.1
Scaffold155_4811844_4891253	Pig.12801	38.5401	5.26829	0.00103159	0.0154824	yes	up	0	0	0	0.16695	0.199791	0.149327	0	0.172023	ITGA9-201	integrin alpha-9 isoform X2 [Sus scrofa]	XP_020927318.1
Scaffold155_4873178_4891253	Pig.12801	48.5619	5.60175	0.000126072	0.0027831	yes	up	0	0	0	0.203244	0.285416	0.16426	0	0.21764	ITGA9-201	integrin alpha-9 isoform X2 [Sus scrofa]	XP_020927318.1
Scaffold155_4876418_4891253	Pig.12801	29.3212	4.87387	0.0244809	0.169002	yes	up	0	0	0	0.130657	0.149843	0.111996	0	0.130832	ITGA9-201	integrin alpha-9 isoform X2 [Sus scrofa]	XP_020927318.1
Scaffold158_4279284_4282928	Pig.12978	122.102	6.93195	1.1573e-07	7.0828e-06	yes	up	0	0	0	0.486334	0.470936	0.664507	0	0.540592	C5-203	complement C5a anaphylatoxin precursor [Sus scrofa]	NP_001001646.1
Scaffold158_4338278_4344658	Pig.12978	29.2645	4.87108	0.0329571	0.204635	yes	up	0	0	0	0.0943633	0.164114	0.134395	0	0.130957	C5-203	complement C5a anaphylatoxin precursor [Sus scrofa]	NP_001001646.1
Scaffold180_2562774_2568653	Pig.13867	10.4059	3.37933	7.05651e-05	0.00172694	yes	up	0	0.012961	0.020003	0.312125	0.563696	0.373319	0.010988	0.41638	PFKFB1-201	6-phosphofructo-2-kinase/fructose-2,6-bisphosphatase 1 isoform X2 [Sus scrofa]	XP_005673720.1
Scaffold180_2562774_2570664	Pig.13867	11.1216	3.47529	4.04722e-22	7.32951e-19	yes	up	0.149687	0.12961	0.260039	5.00851	9.23319	7.08559	0.179778	7.1091	PFKFB1-201	6-phosphofructo-2-kinase/fructose-2,6-bisphosphatase 1 isoform X2 [Sus scrofa]	XP_005673720.1
Scaffold180_2612659_2614311	Pig.13868,MSTRG.43442	25.9655	4.69852	0.0192864	0.143735	yes	up	0	0	0	0	0.228332	0.126928	0	0.11842	#N/A	#N/A	#N/A
Scaffold180_3975819_4001540	Pig.13884	0.0377091	-4.72894	0.0258488	0.175254	yes	down	0.0204118	0	0.0133353	0	0	0	0.011249	0	HUWE1-201	E3 ubiquitin-protein ligase HUWE1 isoform X6 [Sus scrofa]	XP_013841606.1
Scaffold249_2002906_2003964		22.9508	4.52047	1.25362e-06	5.87147e-05	yes	up	0	0.0259219	0	0.936374	1.07744	0.418117	0.00864064	0.810645	#N/A	#N/A	#N/A
Scaffold249_295163_295708	Pig.16592	0.32459	-1.62331	0.000382066	0.00678355	yes	down	0.183706	0.13609	0.2267	0.28309	0.149843	0.194126	0.182166	0.20902	IGF1R-201	insulin-like growth factor 1 receptor isoform X1 [Sus scrofa]	XP_020938574.1
Scaffold267_2060064_2061371	Pig.17347,MSTRG.43903	118.005	6.8827	2.48392e-07	1.40574e-05	yes	up	0	0	0	0.348418	0.627914	0.604776	0	0.527036	#N/A	#N/A	#N/A
Scaffold288_845822_855512	Pig.17809	5.88543	2.55715	2.42515e-07	1.40169e-05	yes	up	0.0680393	0.0194414	0.0466736	0.769424	0.899059	1.05276	0.0447181	0.90708	LAPTM4B-202	lysosomal-associated transmembrane protein 4B [Sus scrofa]	XP_005655413.3
Scaffold288_850448_855512	Pig.17809	6.55792	2.71324	1.14148e-07	7.0828e-06	yes	up	0.0476275	0.0194414	0.0333383	0.631508	0.82057	0.851166	0.0334691	0.767748	LAPTM4B-202	lysosomal-associated transmembrane protein 4B [Sus scrofa]	XP_005655413.3
Scaffold288_854949_855512	Pig.17809	64.1407	6.00317	0.000148174	0.00316942	yes	up	0	0	0	0.399229	0.0642185	0.373319	0	0.278922	LAPTM4B-202	lysosomal-associated transmembrane protein 4B [Sus scrofa]	XP_005655413.3
Scaffold310_574187_626611	Pig.18391	0.0193131	-5.69428	0.00882486	0.0824809	yes	down	0.0136079	0.012961	0.0333383	0	0	0	0.019969	0	SWT1-205	transcriptional protein SWT1 [Sus scrofa]	XP_005667884.1
Scaffold355_330971_367375	Pig.19337	16.7778	4.06848	0.0183436	0.138997	yes	up	0	0	0	0.0725871	0.0927601	0.059731	0	0.0750261	SCMH1-201	polycomb protein SCMH1 isoform X1 [Sus scrofa]	XP_020952602.1
Scaffold419_234994_255861		2.931	1.55139	0.0359359	0.21361	yes	up	0.0544315	0.0324024	0.0266706	0.493593	0.356769	0.35092	0.0378348	0.400427	#N/A	#N/A	#N/A
Scaffold419_250663_255861		3.87101	1.95271	0.0272855	0.181892	yes	up	0.0340197	0.0324024	0.0400059	0.362936	0.699268	0.455449	0.035476	0.505884	#N/A	#N/A	#N/A
Scaffold433_323241_323827	Pig.20395	21.065	4.39677	0.0272597	0.181892	yes	up	0	0	0	0.0871046	0.121302	0.0746637	0	0.0943566	FKBP15-201	LOW QUALITY PROTEIN: FK506-binding protein 15 [Sus scrofa]	XP_020923286.1
Scaffold433_323241_348156	Pig.20395	4.32997	2.11436	0.0442934	0.243744	yes	up	0	0	0.0333383	0.101622	0.18552	0.186659	0.0111128	0.157934	FKBP15-201	LOW QUALITY PROTEIN: FK506-binding protein 15 [Sus scrofa]	XP_020923286.1
Scaffold4454_9718_9891	MSTRG.44768	0.131273	-2.92935	0.00568541	0.059862	yes	down	0.0340197	0.142571	0.0800119	0.108881	0	0.0298655	0.085534	0.0462487	0	0	AMB36376.1
Scaffold4454_9792_9891	MSTRG.44768	0.124172	-3.00959	0.00053289	0.00879998	yes	down	0.0748433	0.220336	0.173359	0.130657	0.0499477	0.0522646	0.15618	0.0776231	0	0	AMB36376.1

## Sheet: N30D_L vs N150D_L_DEcircRNAs
circRNA id	Host gene id	FC(N150D_L/N30D_L)	Log2FC(N150D_L/N30D_L)	Pvalue	Padjust	Significant	Regulate	N30D_L1	N30D_L2	N30D_L3	N150D_L1	N150D_L2	N150D_L3	N30D_L	N150D_L	gene_name	description	nr_hit_name
Chr01_101889767_101891261	Pig.03333	0.0332249	-4.91159	0.0109023	0.0985564	yes	down	0.0272157	0.012961	0.0600089	0	0	0	0.0333952	0	ZNF236-201	zinc finger protein 236 isoform X1 [Sus scrofa]	XP_020954699.1
Chr01_113113103_113118487	Pig.03374	0.0826593	-3.59668	0.000198799	0.00477718	yes	down	0.0884511	0.0453634	0.140021	0.0342898	0	0	0.0912784	0.0114299	ZCCHC2-201	zinc finger CCHC domain-containing protein 2 [Sus scrofa]	XP_020955289.1
Chr01_125554152_125569265	Pig.10746	0.0328799	-4.92665	0.0183241	0.140021	yes	down	0.0340197	0.0324024	0.020003	0	0	0	0.0288083	0	KNL1	LOW QUALITY PROTEIN: kinetochore scaffold 1 [Sus scrofa]	XP_020953269.1
Chr01_125984752_125986449	Pig.10734	0.042974	-4.54039	0.00263196	0.0348767	yes	down	0.0272157	0	0.0533413	0	0	0	0.0268523	0	INO80-201	DNA helicase INO80 [Sus scrofa]	XP_003121636.1
Chr01_128470328_128472537	Pig.14318	0.352641	-1.50373	0.000268612	0.00603046	yes	down	0.251746	0.123129	0.346718	0.128587	0.136424	0.117516	0.240531	0.127509	MFAP1-201	PREDICTED: microfibrillar-associated protein 1 isoform X1 [Cricetulus griseus]	XP_003815004.1
Chr01_129539644_129544125	MSTRG.1761,Pig.14306	4.89786	2.29215	6.98041e-05	0.001965	yes	up	0.0476275	0.0194414	0.0600089	0.282891	0.332532	0.316388	0.0423593	0.310604	#N/A	#N/A	#N/A
Chr01_130102143_130113674		21.639	4.43556	0.0237257	0.166844	yes	up	0	0	0	0.0685795	0.0341059	0.027119	0	0.0432681	#N/A	#N/A	#N/A
Chr01_134883950_134888642	MSTRG.1863,Pig.02307	49.4056	5.6266	0.000136477	0.00346487	yes	up	0	0	0	0.0600071	0.136424	0.0903966	0	0.0956091	#N/A	#N/A	#N/A
Chr01_134987666_135001147	Pig.02305	5.71329	2.51432	1.04432e-11	2.55253e-09	yes	up	0.129275	0.12961	0.106683	0.985831	1.55182	0.858767	0.121856	1.13214	TRPM7-201	transient receptor potential cation channel subfamily M member 7 isoform X1 [Sus scrofa]	XP_023989567.2
Chr01_134990236_135001147	Pig.02305	76.1814	6.25137	3.77046e-06	0.000181282	yes	up	0	0	0	0.162876	0.179056	0.108476	0	0.150136	TRPM7-201	transient receptor potential cation channel subfamily M member 7 isoform X1 [Sus scrofa]	XP_023989567.2
Chr01_141047778_141067158		0.0458348	-4.44741	0.00539506	0.0597209	yes	down	0.0136079	0.0194414	0.0333383	0	0	0	0.0221292	0	#N/A	#N/A	#N/A
Chr01_146320093_146329661	Pig.02237	17.7997	4.15378	0.0144197	0.120899	yes	up	0	0	0	0.0171449	0.0596853	0.027119	0	0.0346497	VPS13C-201	vacuolar protein sorting-associated protein 13C isoform X2 [Sus scrofa]	XP_020950024.1
Chr01_149381791_149383270	Pig.02209	0.473133	-1.07968	0.0230905	0.163774	yes	down	0.15649	0.116649	0.260039	0.145731	0.0852647	0.153674	0.177726	0.128223	NARS1	asparagine--tRNA ligase, cytoplasmic isoform X2 [Sus scrofa]	XP_003121503.3
Chr01_149573571_149585170		70.5592	6.14076	0.0160338	0.129806	yes	up	0	0	0	0.454339	0	0	0	0.151446	#N/A	#N/A	#N/A
Chr01_149573571_149621592		72.4924	6.17976	5.18214e-06	0.000223449	yes	up	0	0	0	0.197166	0.14495	0.0903966	0	0.144171	#N/A	#N/A	#N/A
Chr01_149573571_149644642		53.9884	5.75458	3.90306e-05	0.00119804	yes	up	0	0	0	0.0942968	0.110844	0.108476	0	0.104539	#N/A	#N/A	#N/A
Chr01_149643366_149644642		111.813	6.80494	4.39288e-07	2.94648e-05	yes	up	0	0	0	0.428622	0.110844	0.135595	0	0.22502	#N/A	#N/A	#N/A
Chr01_150155875_150158392	Pig.02205	0.431458	-1.21271	0.000958392	0.0164777	yes	down	0.312981	0.27218	0.286709	0.205739	0.162003	0.235031	0.290623	0.200924	WDR7-201	WD repeat-containing protein 7 isoform X1 [Sus scrofa]	XP_020949254.1
Chr01_150306573_150308258	Pig.02204	13.8775	3.79468	0.0208242	0.151863	yes	up	0	0	0	0	0.0426324	0.0361586	0	0.0262637	TXNL1-202	thioredoxin-like protein 1 isoform X1 [Castor canadensis]	XP_020042489.1
Chr01_151532417_151542472	Pig.02203	0.223871	-2.15926	0.0273604	0.181631	yes	down	0.0816472	0.0388829	0.0466736	0.0342898	0.0255794	0	0.0557346	0.0199564	TCF4-206	transcription factor 4 isoform X1 [Sus scrofa]	XP_020949090.1
Chr01_151532417_151559030	Pig.02203	0.0632473	-3.98285	0.000309825	0.00665026	yes	down	0.108863	0.0712853	0.0933472	0	0	0.027119	0.0911651	0.00903966	TCF4-206	transcription factor 4 isoform X1 [Sus scrofa]	XP_020949090.1
Chr01_160890998_160891782		0.323618	-1.62764	0.000197837	0.00477718	yes	down	0.326589	0.155531	0.286709	0.137159	0.136424	0.108476	0.256277	0.127353	#N/A	#N/A	#N/A
Chr01_162166054_162169510	Pig.08979	0.0115502	-6.43594	1.15574e-12	3.3048e-10	yes	down	0.503491	0.550841	0.773448	0.0171449	0.0170529	0	0.60926	0.0113993	SETBP1-201	SET-binding protein isoform X1 [Sus scrofa]	XP_013844009.2
Chr01_173364048_173366484	Pig.07316	5.89907	2.56049	0.00565091	0.0615258	yes	up	0	0	0.0533413	0.137159	0.119371	0.180793	0.0177804	0.145774	BCKDHB-201	2-oxoisovalerate dehydrogenase subunit beta, mitochondrial isoform X1 [Sus scrofa]	XP_020938559.1
Chr01_176366641_176466186	Pig.00707	0.0426127	-4.55257	0.0202188	0.148678	yes	down	0.0272157	0.0259219	0.0133353	0	0	0	0.0221577	0	ME1-201	NADP-dependent malic enzyme [Sus scrofa]	XP_001924368.2
Chr01_176448874_176466186	Pig.00707	0.0239492	-5.38388	5.80279e-10	1.16765e-07	yes	down	1.10904	0.2657	0.31338	0.0171449	0.0255794	0.0180793	0.562707	0.0202679	ME1-201	NADP-dependent malic enzyme [Sus scrofa]	XP_001924368.2
Chr01_181216304_181256568	Pig.00728	0.021815	-5.51854	0.0217138	0.156253	yes	down	0.0204118	0.0648048	0.0333383	0	0	0	0.0395183	0	LAMA4-201	LOW QUALITY PROTEIN: laminin subunit alpha-4 [Sus scrofa]	XP_013848215.2
Chr01_182615642_182642829	Pig.00740	34.96	5.12763	0.000297551	0.00646639	yes	up	0	0	0.0133353	0.505774	0.0767383	0.135595	0.0044451	0.239369	CDK19-201	PREDICTED: cyclin-dependent kinase 19-like isoform X1 [Elephantulus edwardii]	XP_020946795.1
Chr01_182642754_182716683	Pig.00740	60.49	5.91862	1.3135e-05	0.000488783	yes	up	0	0	0	0.0942968	0.170529	0.0903966	0	0.118408	CDK19-201	PREDICTED: cyclin-dependent kinase 19-like isoform X1 [Elephantulus edwardii]	XP_020946795.1
Chr01_182760362_182767594	Pig.00740	2.63264	1.39651	0.0192179	0.144132	yes	up	0.0204118	0.0259219	0.0466736	0.137159	0.196109	0.0542379	0.0310024	0.129169	CDK19-201	PREDICTED: cyclin-dependent kinase 19-like isoform X1 [Elephantulus edwardii]	XP_020946795.1
Chr01_193074441_193076656	Pig.00796	14.6134	3.86922	0.0262458	0.177153	yes	up	0	0	0	0.0257173	0.0426324	0.0180793	0	0.0288097	PNISR-201	SR rich protein, partial [Homo sapiens]	NP_001106910.1
Chr01_207420625_207465177	Pig.00864	15.8859	3.98968	1.022e-08	1.29128e-06	yes	up	0.0408236	0.0453634	0.0800119	0.497202	2.03783	1.50962	0.0553996	1.34822	RIMS1-201	regulating synaptic membrane exocytosis protein 1 isoform X9 [Sus scrofa]	XP_020928548.1
Chr01_207420625_207476422	Pig.00864	30.3944	4.92573	0.0232056	0.164375	yes	up	0	0	0	0.0257173	0.0852647	0.0632776	0	0.0580865	RIMS1-201	regulating synaptic membrane exocytosis protein 1 isoform X9 [Sus scrofa]	XP_020928548.1
Chr01_214379127_214383038		4.56641	2.19106	1.22389e-08	1.47764e-06	yes	up	0.0884511	0.0648048	0.0933472	0.617216	0.707697	0.442943	0.082201	0.589285	#N/A	#N/A	#N/A
Chr01_214380720_214383038		4.52137	2.17676	8.00247e-10	1.49922e-07	yes	up	0.163294	0.0712853	0.166691	1.14871	0.920859	0.714133	0.133757	0.9279	#N/A	#N/A	#N/A
Chr01_214381281_214383035		9.36816	3.22777	0.00488816	0.0556759	yes	up	0	0.0194414	0	0.137159	0.136424	0.0632776	0.00648048	0.112287	#N/A	#N/A	#N/A
Chr01_214381281_214383038		5.17411	2.37131	0.000232362	0.00541813	yes	up	0	0.0388829	0.0400059	0.308608	0.238741	0.135595	0.0262963	0.227648	#N/A	#N/A	#N/A
Chr01_222542490_222572939	Pig.03989	6.42133	2.68287	0.00982392	0.0923258	yes	up	0.0136079	0	0.0266706	0.077152	0.162003	0.126555	0.0134262	0.121903	TRMT11-201	tRNA (guanine(10)-N2)-methyltransferase homolog isoform X1 [Sus scrofa]	XP_001928696.1
Chr01_225334410_225381253	Pig.04000	0.0314618	-4.99025	0.00613297	0.0657207	yes	down	0.0204118	0.012961	0.0733442	0	0	0	0.0355723	0	LAMA2	LOW QUALITY PROTEIN: laminin subunit alpha-2 [Sus scrofa]	XP_020940122.1
Chr01_225853573_225876920	Pig.04001	0.0143315	-6.12466	0.000787891	0.0138531	yes	down	0.0408236	0.0324024	0.160024	0	0	0	0.0777499	0	ARHGAP18-201	rho GTPase-activating protein 18 isoform X4 [Sus scrofa]	XP_020944089.1
Chr01_225864275_225876920	Pig.04001	0.028898	-5.11289	0.00203995	0.0285645	yes	down	0.0204118	0.0388829	0.0400059	0	0	0	0.0331002	0	ARHGAP18-201	rho GTPase-activating protein 18 isoform X4 [Sus scrofa]	XP_020944089.1
Chr01_225868396_225876920	Pig.04001	0.0466693	-4.42138	0.00601586	0.0647212	yes	down	0.0408236	0	0.0333383	0	0	0	0.0247206	0	ARHGAP18-201	rho GTPase-activating protein 18 isoform X4 [Sus scrofa]	XP_020944089.1
Chr01_228240804_228242964	Pig.04015	103.986	6.70024	9.73152e-07	5.74689e-05	yes	up	0	0	0	0.257173	0.247268	0.117516	0	0.207319	MOXD1-201	LOW QUALITY PROTEIN: DBH-like monooxygenase protein 1 [Sus scrofa]	XP_001926966.2
Chr01_237261552_237265394	Pig.05210	17.0796	4.0942	3.9857e-06	0.000189107	yes	up	0	0.012961	0.020003	0.377187	0.238741	0.280229	0.010988	0.298719	ADGRG6-201	adhesion G-protein coupled receptor G6 isoform X1 [Sus scrofa]	XP_020942830.1
Chr01_239111391_239126201	Pig.05196	0.0372016	-4.74849	0.0086628	0.0844973	yes	down	0.0408236	0.012961	0.0333383	0	0	0	0.0290409	0	UTRN	utrophin isoform X4 [Sus scrofa]	XP_020927918.1
Chr01_239184899_239196493	Pig.05196	0.0477267	-4.38906	0.0236444	0.166615	yes	down	0.0408236	0	0.0333383	0	0	0	0.0247206	0	UTRN	utrophin isoform X4 [Sus scrofa]	XP_020927918.1
Chr01_241059692_241081296	Pig.05188	0.058282	-4.10081	0.0417786	0.244319	yes	down	0.0136079	0.012961	0.0266706	0	0	0	0.0177465	0	RAB32-204	androglobin isoform X1 [Sus scrofa]	XP_013847960.2
Chr01_245876855_245917642	Pig.17502	32.5394	5.02412	0.00341984	0.0427096	yes	up	0	0	0	0.0514346	0.0426324	0.0903966	0	0.0614879	ESR1-201	estrogen receptor isoform X1 [Sus scrofa]	XP_020938661.1
Chr01_245959680_245960754	Pig.17502	99.163	6.63173	2.05272e-06	0.000110716	yes	up	0	0	0	0.274318	0.170529	0.144634	0	0.196494	ESR1-201	estrogen receptor isoform X1 [Sus scrofa]	XP_020938661.1
Chr01_248337313_248340068		0.30356	-1.71994	0.043745	0.251765	yes	down	0.0816472	0.0194414	0.0600089	0	0.0255794	0.0451983	0.0536992	0.0235926	#N/A	#N/A	#N/A
Chr01_251787914_251799602	MSTRG.3249,Pig.09636	8.78422	3.13491	0.0379901	0.227651	yes	up	0	0.012961	0	0.0685795	0.0596853	0.0813569	0.00432032	0.0698739	#N/A	#N/A	#N/A
Chr01_253340828_253344572	MSTRG.3284,Pig.09657	48.065	5.58691	0.0031607	0.0402156	yes	up	0	0	0	0.145731	0.0682118	0.0723172	0	0.0954202	#N/A	#N/A	#N/A
Chr01_255681370_255681512	MSTRG.3307,Pig.16879	25.5084	4.6729	0.00649863	0.0682332	yes	up	0	0	0	0.0171449	0.0852647	0.0451983	0	0.0492026	#N/A	#N/A	#N/A
Chr01_255681370_255702453	MSTRG.3307,Pig.16879	3.09309	1.62905	0.0447772	0.255272	yes	up	0.0136079	0.012961	0.0333383	0.0600071	0.162003	0.0632776	0.019969	0.0950959	#N/A	#N/A	#N/A
Chr01_32467155_32487321	Pig.03310	0.0628667	-3.99156	0.00972567	0.0915764	yes	down	0.0136079	0.0194414	0.0133353	0	0	0	0.0154615	0	CBWD1	COBW domain-containing protein 2 isoform X1 [Sus scrofa]	XP_001924427.4
Chr01_3467978_3519068	Pig.03801	0.118426	-3.07794	0.000283855	0.00629462	yes	down	0.108863	0.0388829	0.100015	0.0171449	0	0.027119	0.0825869	0.0147546	TMEM245-202	transmembrane protein 245 isoform X1 [Sus scrofa]	XP_005660377.1
Chr01_34982119_35000049	Pig.03299	0.217398	-2.20159	0.00543249	0.0598676	yes	down	0.0816472	0.0453634	0.106683	0.0428622	0.0170529	0.0180793	0.0778977	0.0259982	PUM3-201	pumilio homolog 3 [Sus scrofa]	XP_001927704.4
Chr01_3499412_3519068	Pig.03801	0.0477218	-4.38921	0.0418216	0.244319	yes	down	0.0476275	0	0.0266706	0	0	0	0.0247661	0	TMEM245-202	transmembrane protein 245 isoform X1 [Sus scrofa]	XP_005660377.1
Chr01_36216621_36217740	Pig.03295	0.354107	-1.49774	0.0324845	0.205937	yes	down	0.0612354	0.168492	0.160024	0.102869	0.0426324	0.0903966	0.129917	0.0786327	GLIS3-201	zinc finger protein GLIS3 isoform X1 [Sus scrofa]	XP_020930038.1
Chr01_36216621_36224533	Pig.03295	0.271623	-1.88032	0.0253055	0.172937	yes	down	0.0272157	0.0712853	0.0800119	0.0171449	0.0170529	0.0451983	0.0595043	0.0264654	GLIS3-201	zinc finger protein GLIS3 isoform X1 [Sus scrofa]	XP_020930038.1
Chr01_37897808_37898245	Pig.03277	2.92703	1.54944	0.0486207	0.265702	yes	up	0.0476275	0	0.0800119	0.120014	0.264321	0.135595	0.0425465	0.17331	KIAA2026-201	uncharacterized protein KIAA2026 homolog isoform X1 [Sus scrofa]	XP_003121963.3
Chr01_37930886_37959001	Pig.03277	4.61456	2.20619	0.000806555	0.0140901	yes	up	0.0340197	0.0453634	0.0533413	0.308608	0.409271	0.27119	0.0442414	0.329689	KIAA2026-201	uncharacterized protein KIAA2026 homolog isoform X1 [Sus scrofa]	XP_003121963.3
Chr01_47916059_47918028	Pig.03256	0.00603552	-7.37231	4.31071e-08	4.41888e-06	yes	down	0.129275	0.174973	0.173359	0	0	0	0.159202	0	BNC2-202	zinc finger protein basonuclin-2 isoform X1 [Sus scrofa]	XP_020918949.1
Chr01_48157118_48173815	Pig.03256	0.0217566	-5.52241	0.00963171	0.0910071	yes	down	0.0136079	0.0583243	0.0533413	0	0	0	0.0417578	0	BNC2-202	zinc finger protein basonuclin-2 isoform X1 [Sus scrofa]	XP_020918949.1
Chr01_50907637_50907775	Pig.16750,MSTRG.668	0.114822	-3.12253	0.000586375	0.0109477	yes	down	0.0748433	0.0907267	0.166691	0.0428622	0	0.0180793	0.110754	0.0203138	#N/A	#N/A	#N/A
Chr01_5148753_5168097	Pig.03809	4.14436	2.05115	0.0202233	0.148678	yes	up	0.0204118	0	0.0133353	0.0514346	0.102318	0.0542379	0.011249	0.0693301	RAD23B-201	PREDICTED: UV excision repair protein RAD23 homolog B isoform X1 [Pteropus alecto]	XP_001927901.1
Chr01_69483410_69503247	Pig.05374	20.0802	4.3277	0.0063111	0.0669691	yes	up	0	0	0	0.0600071	0.0426324	0.0180793	0	0.0402396	KTN1-207	kinectin [Sus scrofa]	NP_001245232.1
Chr01_69500313_69509750		17.0703	4.09341	0.0180357	0.138498	yes	up	0	0	0	0.0428622	0	0.0542379	0	0.0323667	#N/A	#N/A	#N/A
Chr01_71798631_71831568	Pig.02917	0.113614	-3.13779	0.000265697	0.00598977	yes	down	0.122471	0.123129	0.0800119	0.0257173	0	0.0361586	0.108537	0.0206253	DDHD1-201	phospholipase DDHD1 isoform X5 [Sus scrofa]	XP_003121845.1
Chr01_72177477_72180594	Pig.02913	13.1236	3.71409	0.0490133	0.266823	yes	up	0	0	0	0.0342898	0.0255794	0.0180793	0	0.0259828	PSMC6-201	26S protease regulatory subunit 10B [Sus scrofa]	XP_001928782.2
Chr01_72779231_72783251	Pig.02907	0.0381783	-4.7111	1.04711e-06	6.05206e-05	yes	down	0.292569	0.155531	0.266706	0.0257173	0.0170529	0	0.238269	0.0142568	NID2-201	nidogen-2 isoform X1 [Sus scrofa]	XP_020957573.1
Chr01_73970753_73993759	Pig.02896	0.0323062	-4.95205	0.0223197	0.159347	yes	down	0.0544315	0.0324024	0	0	0	0	0.0289446	0	NIN-204	ninein isoform X3 [Sus scrofa]	XP_020957310.1
Chr01_79239304_79239909	Pig.02867	18.0837	4.17661	0.00283356	0.0371852	yes	up	0	0	0	0.0342898	0.0255794	0.0451983	0	0.0350225	PRPF39-201	pre-mRNA-processing factor 39 isoform X1 [Sus scrofa]	XP_001927155.1
Chr01_84804013_84812312	Pig.02859	5.39291	2.43107	0.00546719	0.0600145	yes	up	0.0136079	0.0259219	0	0.154304	0.0937912	0.117516	0.0131766	0.12187	MIA2	melanoma inhibitory activity protein 2 isoform X2 [Sus scrofa]	XP_020929628.1
Chr01_85151011_85183307	Pig.02853	0.0869028	-3.52445	0.0409207	0.240089	yes	down	0.0204118	0.012961	0	0	0	0	0.0111243	0	MYO9A-201	unconventional myosin-IXa isoform X1 [Sus scrofa]	XP_020956536.1
Chr01_87757404_87763045	Pig.02840	0.0656608	-3.92882	0.00539719	0.0597209	yes	down	0.0884511	0.0324024	0.0466736	0.0171449	0	0	0.0558424	0.00571496	NOX5-201	NADPH oxidase 5 isoform X2 [Sus scrofa]	XP_020956203.1
Chr01_89384622_89411464	Pig.02826	47.2956	5.56363	0.000335015	0.00700053	yes	up	0	0	0	0.0685795	0.136424	0.0723172	0	0.0924401	ZC3H13-201	zinc finger CCCH domain-containing protein 13 isoform X8 [Sus scrofa]	XP_020921252.1
Chr01_89396683_89411464	Pig.02826	28.9856	4.85726	0.00466779	0.0539577	yes	up	0	0	0	0.0171449	0.0852647	0.0632776	0	0.0552291	ZC3H13-201	zinc finger CCCH domain-containing protein 13 isoform X8 [Sus scrofa]	XP_020921252.1
Chr01_89458208_89475492	Pig.02825	50.4459	5.65667	0.000177329	0.00437922	yes	up	0	0	0	0.0685795	0.14495	0.0813569	0	0.0982955	CPB2-201	carboxypeptidase B2 [Sus scrofa]	XP_001929181.1
Chr01_89458208_89480626	Pig.02825	21.073	4.39732	0.0175561	0.137043	yes	up	0	0	0	0.0428622	0.0341059	0.0451983	0	0.0407221	CPB2-201	carboxypeptidase B2 [Sus scrofa]	XP_001929181.1
Chr01_89463756_89483212	Pig.02825	29.9292	4.90348	0.0378865	0.227445	yes	up	0	0	0	0	0.0426324	0.117516	0	0.0533826	CPB2-201	carboxypeptidase B2 [Sus scrofa]	XP_001929181.1
Chr01_89715558_89717688	Pig.02822	0.184581	-2.43767	0.00304978	0.0392317	yes	down	0.108863	0.0453634	0.0866795	0.0171449	0.0511588	0	0.0803019	0.0227679	RUBCNL-201	protein RUBCNL-like isoform X1 [Sus scrofa]	XP_020921247.1
Chr01_91823430_91824710	Pig.13833	0.0736397	-3.76337	0.0166362	0.132528	yes	down	0	0	0.0466736	0	0	0	0.0155579	0	MEF2A-201	PREDICTED: myocyte-specific enhancer factor 2A isoform X3 [Cercocebus atys]	XP_011933066.1
Chr01_95256133_95262693		2.10711	1.07527	0.000752428	0.0133549	yes	up	0.176902	0.12961	0.206697	0.608643	0.622433	0.461022	0.17107	0.564033	#N/A	#N/A	#N/A
Chr01_99667043_99684106	Pig.13147	14.2589	3.8338	0.0172184	0.135576	yes	up	0	0	0.0133353	0.128587	0.0596853	0.0903966	0.0044451	0.0928895	PCSK6-201	proprotein convertase subtilisin/kexin type 6 isoform X4 [Sus scrofa]	XP_020954610.1
Chr01_99680098_99684106	Pig.13147	27.4245	4.77739	6.95005e-06	0.00029271	yes	up	0	0	0.020003	0.282891	0.426324	0.126555	0.00666766	0.27859	PCSK6-201	proprotein convertase subtilisin/kexin type 6 isoform X4 [Sus scrofa]	XP_020954610.1
Chr02_103734250_103780043	Pig.06137,MSTRG.5788	0.0388266	-4.68681	0.0209256	0.152194	yes	down	0.0204118	0.0194414	0.0400059	0	0	0	0.0266197	0	#N/A	#N/A	#N/A
Chr02_10638020_10644799	Pig.14581	0.387234	-1.36872	0.0484574	0.265541	yes	down	0.0952551	0.0453634	0.120018	0.0257173	0.0511588	0.0723172	0.0868787	0.0497311	UBE2D3-202	NR:NA	NP_003330.1
Chr02_108647660_108671148	Pig.09900	0.0566048	-4.14293	0.0220353	0.158148	yes	down	0.0476275	0	0.0133353	0	0	0	0.020321	0	MRVI1-207	protein MRVI1 isoform X3 [Sus scrofa]	XP_013850014.1
Chr02_10872284_10875081	Pig.14571	0.494427	-1.01617	0.0161767	0.130397	yes	down	0.163294	0.142571	0.173359	0.128587	0.179056	0.0723172	0.159741	0.126653	MATR3	PREDICTED: matrin-3-like isoform X1 [Lipotes vexillifer]	XP_013850634.1
Chr02_110032677_110038253	Pig.09907	0.129171	-2.95265	0.0331251	0.208056	yes	down	0.0136079	0.0194414	0.0600089	0	0	0.0180793	0.0310194	0.00602644	USP47-201	ubiquitin carboxyl-terminal hydrolase 47 isoform X2 [Sus scrofa]	XP_020938974.1
Chr02_120685153_120715387	Pig.05931	85.5917	6.4194	3.11279e-06	0.000155154	yes	up	0	0	0	0.222883	0.179056	0.108476	0	0.170138	GAS2-201	growth arrest-specific protein 2 [Sus scrofa]	XP_020938899.1
Chr02_129529725_129544183	Pig.12557	2.74215	1.45531	0.0131523	0.111651	yes	up	0.0544315	0.0453634	0.0733442	0.197166	0.409271	0.144634	0.057713	0.250357	QSER1-205	glutamine and serine-rich protein 1 [Sus scrofa]	XP_013849914.1
Chr02_129557508_129571492	Pig.12557	17.7965	4.15352	0.00694489	0.0724215	yes	up	0	0	0	0.0171449	0.0596853	0.027119	0	0.0346497	QSER1-205	glutamine and serine-rich protein 1 [Sus scrofa]	XP_013849914.1
Chr02_129618137_129623462	Pig.12558	56.5318	5.82099	3.42268e-05	0.0010687	yes	up	0	0	0	0.0942968	0.136424	0.0994362	0	0.110052	DEPDC7-201	DEP domain-containing protein 7 [Sus scrofa]	XP_020938868.1
Chr02_130989369_130994154	Pig.12571	57.3502	5.84173	0.00138071	0.0210714	yes	up	0	0	0	0.128587	0.162003	0.0542379	0	0.114943	CAT-201	catalase [Sus scrofa]	NP_999466.2
Chr02_130989369_131012754	Pig.12571	35.3657	5.14428	0.0069897	0.0726535	yes	up	0	0	0	0.0685795	0.127897	0.0180793	0	0.0715186	CAT-201	catalase [Sus scrofa]	NP_999466.2
Chr02_130990677_130992200	Pig.12571	23.8193	4.57406	0.00362906	0.0446079	yes	up	0	0	0	0.0514346	0.0426324	0.0451983	0	0.0464218	CAT-201	catalase [Sus scrofa]	NP_999466.2
Chr02_130990677_131007514	Pig.12571	3.42284	1.7752	0.000230752	0.00541813	yes	up	0.19051	0.0518438	0.20003	0.540064	0.912333	0.741252	0.147461	0.731216	CAT-201	catalase [Sus scrofa]	NP_999466.2
Chr02_130992790_130998896	Pig.12571	103.287	6.69052	2.5143e-05	0.000837497	yes	up	0	0	0	0.274318	0.281374	0.0723172	0	0.209336	CAT-201	catalase [Sus scrofa]	NP_999466.2
Chr02_130998705_131012754	Pig.12571	13.5028	3.75519	0.0025514	0.0339749	yes	up	0	0	0.020003	0.154304	0.153477	0.0903966	0.00666766	0.132726	CAT-201	catalase [Sus scrofa]	NP_999466.2
Chr02_131004429_131012754	Pig.12571	14.2487	3.83276	0.00253195	0.033882	yes	up	0.0136079	0	0	0.128587	0.0937912	0.0723172	0.00453596	0.0982317	CAT-201	catalase [Sus scrofa]	NP_999466.2
Chr02_131007384_131014572	Pig.12571	40.5188	5.34052	0.00148027	0.0222779	yes	up	0	0	0	0.0428622	0.162003	0.0361586	0	0.0803413	CAT-201	catalase [Sus scrofa]	NP_999466.2
Chr02_138667128_138670999	Pig.12692	2.36554	1.24217	0.0474013	0.261719	yes	up	0.115667	0.0194414	0	0.240028	0.136424	0.117516	0.0450361	0.164656	TTC17-201	tetratricopeptide repeat protein 17 isoform X1 [Sus scrofa]	XP_020938829.1
Chr02_146743201_146743466	Pig.15343	0.0408746	-4.61265	0.00983925	0.0923258	yes	down	0.0136079	0.012961	0.0533413	0	0	0	0.0266367	0	SSRP1-201	PREDICTED: FACT complex subunit SSRP1 isoform X4 [Cebus capucinus imitator]	XP_003353912.1
Chr02_15134551_15165811	Pig.17377	0.110782	-3.17421	0.0109612	0.09876	yes	down	0.0680393	0.0194414	0.0133353	0	0.0170529	0	0.0336054	0.00568432	SEC24A-201	protein transport protein Sec24A [Sus scrofa]	NP_001230853.1
Chr02_15152164_15161605	Pig.17377	22.4278	4.48722	0.0181733	0.139064	yes	up	0	0	0	0.0514346	0.0341059	0.0451983	0	0.0435796	SEC24A-201	protein transport protein Sec24A [Sus scrofa]	NP_001230853.1
Chr02_152254104_152319280		68.4414	6.0968	8.56459e-06	0.000344677	yes	up	0	0	0	0.0857244	0.247268	0.0723172	0	0.135103	#N/A	#N/A	#N/A
Chr02_152270778_152273957	Pig.19118	138.492	7.11366	1.9872e-08	2.34706e-06	yes	up	0	0	0	0.222883	0.2899	0.289269	0	0.267351	SLC22A9	solute carrier family 22 member 9-like isoform X1 [Sus scrofa]	XP_020938567.1
Chr02_154177160_154177274		17.7377	4.14874	0.0227291	0.161421	yes	up	0	0	0	0.0257173	0.0511588	0.027119	0	0.034665	#N/A	#N/A	#N/A
Chr02_155120291_155121860	Pig.19962	0.0426546	-4.55115	0.0113202	0.101489	yes	down	0	0.0194414	0.0533413	0	0	0	0.0242609	0	LOC101153177	PREDICTED: RNA-binding protein 4 isoform X1 [Canis lupus familiaris]	TKC36575.1
Chr02_155636386_155663230	Pig.20857	0.108172	-3.2086	2.99013e-15	2.32077e-12	yes	down	0.83008	0.440673	0.506742	0.128587	0.0852647	0.0903966	0.592498	0.101416	Gstp1	glutathione S-transferase P-like isoform X1 [Sus scrofa]	XP_020938401.1
Chr02_158020903_158028723	Pig.17120	29.5521	4.88519	0.000560364	0.010571	yes	up	0	0	0	0.0857244	0.0341059	0.0542379	0	0.0580227	ANO1-204	anoctamin-1 isoform X1 [Sus scrofa]	XP_020938329.1
Chr02_159713586_159713781		0.0705393	-3.82543	0.0233073	0.164667	yes	down	0.0476275	0	0	0	0	0	0.0158758	0	#N/A	#N/A	#N/A
Chr02_161624907_161630872	Pig.20939	0.0709341	-3.81738	0.0152175	0.124889	yes	down	0.0544315	0.0324024	0.0666766	0.0171449	0	0	0.0511701	0.00571496	EHMT2-201	histone-lysine N-methyltransferase EHMT1 isoform X3 [Sus scrofa]	XP_020936858.1
Chr02_162778048_162784074	Pig.21711	2.89518	1.53365	4.13152e-05	0.00125601	yes	up	0.19051	0.207375	0.146688	0.788665	1.08286	0.741252	0.181525	0.870926	RXRA-201	retinoic acid receptor RXR-alpha isoform X2 [Sus scrofa]	XP_020927110.1
Chr02_167588022_167590204	Pig.17878	5.40685	2.43479	0.0123132	0.106505	yes	up	0	0	0.0333383	0.0600071	0.170529	0.0361586	0.0111128	0.0888984	KYAT1	kynurenine--oxoglutarate transaminase 1 isoform X3 [Sus scrofa]	XP_005660557.1
Chr02_170091425_170138243	Pig.10210	0.0356427	-4.81025	0.0320071	0.203624	yes	down	0.0204118	0.012961	0.0600089	0	0	0	0.0311272	0	MVB12B-201	PREDICTED: multivesicular body subunit 12B [Camelus dromedarius]	XP_020924627.1
Chr02_170120249_170138243	Pig.10210	0.0296985	-5.07347	0.0107105	0.0979624	yes	down	0.0136079	0.0518438	0.020003	0	0	0	0.0284849	0	MVB12B-201	PREDICTED: multivesicular body subunit 12B [Camelus dromedarius]	XP_020924627.1
Chr02_22409998_22415126	Pig.12386	5.41435	2.43679	1.16795e-06	6.67412e-05	yes	up	0.0272157	0.012961	0.0800119	0.334325	0.383691	0.26215	0.0400629	0.326722	ALDH7A1-205	alpha-aminoadipic semialdehyde dehydrogenase [Sus scrofa]	XP_013850523.2
Chr02_33534085_33534503	Pig.05649	30.1033	4.91185	4.22947e-06	0.000191489	yes	up	0	0.0194414	0	0.31718	0.324006	0.379666	0.00648048	0.340284	KCNN2-201	small conductance calcium-activated potassium channel protein 2 isoform X2 [Sus scrofa]	XP_020940295.1
Chr02_37605171_37608291	Pig.05628	28.3735	4.82647	0.025175	0.172292	yes	up	0	0	0	0.102869	0.0426324	0.027119	0	0.0575402	MAN2A1-205	alpha-mannosidase 2 [Sus scrofa]	XP_003123871.4
Chr02_430051_433856	Pig.19916	0.233617	-2.09778	0.0215593	0.155347	yes	down	0.0816472	0.0259219	0.0666766	0.0171449	0.0255794	0.0180793	0.0580819	0.0202679	DCTN4-202	dynactin subunit 4 [Sus scrofa]	NP_001231236.1
Chr02_4322519_4331153	Pig.12005	0.129723	-2.9465	0.0200776	0.148209	yes	down	0.0136079	0.012961	0.0666766	0	0	0.0180793	0.0310818	0.00602644	TCERG1-201	LOW QUALITY PROTEIN: transcription elongation regulator 1 [Sus scrofa]	XP_003354387.3
Chr02_49759974_49766895		9.80021	3.29281	0.00736559	0.0753475	yes	up	0.0136079	0	0	0.0600071	0.0767383	0.0632776	0.00453596	0.0666743	#N/A	#N/A	#N/A
Chr02_51442713_51444681	Pig.08473	45.178	5.49755	0.0271888	0.181001	yes	up	0	0	0	0.120014	0	0.135595	0	0.085203	KIAA0825	uncharacterized protein KIAA0825 homolog isoform X1 [Sus scrofa]	XP_020941036.1
Chr02_51562242_51636286		31.0332	4.95574	0.00713327	0.0738192	yes	up	0	0	0	0.077152	0.0511588	0.0542379	0	0.0608496	#N/A	#N/A	#N/A
Chr02_52030318_52045594		0.274774	-1.86368	0.0402068	0.23718	yes	down	0.0748433	0.0972072	0.0533413	0.0514346	0	0.0542379	0.0751306	0.0352242	#N/A	#N/A	#N/A
Chr02_56247505_56259953	Pig.02459	0.20047	-2.31854	0.0169726	0.13442	yes	down	0.0612354	0.012961	0.0400059	0.0171449	0.0170529	0	0.0380674	0.0113993	MEF2C-204	PREDICTED: myocyte-specific enhancer factor 2C isoform X2 [Sorex araneus]	XP_020937758.1
Chr02_60658293_60663530	Pig.02468	0.091582	-3.44879	0.011922	0.10464	yes	down	0.142883	0.0777657	0.120018	0.0514346	0	0	0.113555	0.0171449	VCAN-201	versican core protein isoform X1 [Sus scrofa]	XP_020936732.1
Chr02_64288819_64298085	MSTRG.4458,MSTRG.4459,Pig.02491	9.59753	3.26266	0.000754641	0.0133549	yes	up	0	0.0194414	0	0.137159	0.136424	0.0451983	0.00648048	0.10626	#N/A	#N/A	#N/A
Chr02_64288819_64310703	MSTRG.4458,MSTRG.4459,Pig.02491	163.141	7.34998	1.99114e-09	3.38059e-07	yes	up	0	0	0	0.257173	0.426324	0.27119	0	0.318229	#N/A	#N/A	#N/A
Chr02_64347276_64350833	MSTRG.4458,MSTRG.4459,Pig.02491	18.8088	4.23333	0.00555316	0.060583	yes	up	0	0	0	0.0428622	0.0511588	0.0180793	0	0.0373668	#N/A	#N/A	#N/A
Chr02_64569831_64579384	MSTRG.4463,Pig.02493	35.1826	5.13679	0.00300173	0.0389222	yes	up	0	0	0	0.077152	0.0341059	0.0903966	0	0.0672181	#N/A	#N/A	#N/A
Chr02_64570850_64579384	MSTRG.4463,Pig.02493	34.5418	5.11027	0.025135	0.172292	yes	up	0	0	0	0.077152	0.0937912	0.0361586	0	0.0690339	#N/A	#N/A	#N/A
Chr02_64635810_64674168	Pig.02495	62.0737	5.95591	0.000112143	0.00296063	yes	up	0	0	0	0.0685795	0.204635	0.0903966	0	0.121204	DMGDH-201	dimethylglycine dehydrogenase, mitochondrial isoform X1 [Sus scrofa]	XP_020940139.1
Chr02_64735168_64749814	Pig.02496	8.62355	3.10828	4.13815e-05	0.00125601	yes	up	0.0136079	0.012961	0.0733442	0.548636	0.102318	0.587578	0.0333043	0.412844	ARSB-202	arylsulfatase B isoform X1 [Sus scrofa]	XP_020940137.1
Chr02_66893835_66904174	Pig.02512	25.7521	4.68662	0.0434049	0.250871	yes	up	0	0	0	0.0342898	0.0596853	0.0542379	0	0.0494043	IQGAP2-201	LOW QUALITY PROTEIN: ras GTPase-activating-like protein IQGAP2 [Sus scrofa]	XP_020940121.1
Chr02_66900739_66904174	Pig.02512	21.926	4.45457	0.0473178	0.261523	yes	up	0	0	0	0.077152	0.0596853	0	0	0.0456124	IQGAP2-201	LOW QUALITY PROTEIN: ras GTPase-activating-like protein IQGAP2 [Sus scrofa]	XP_020940121.1
Chr02_66979806_66991420	Pig.02512	34.3523	5.10234	1.25629e-05	0.000480665	yes	up	0	0	0.0133353	0.162876	0.341059	0.189833	0.0044451	0.231256	IQGAP2-201	LOW QUALITY PROTEIN: ras GTPase-activating-like protein IQGAP2 [Sus scrofa]	XP_020940121.1
Chr02_66979806_66998212	Pig.02512	82.2456	6.36187	4.65197e-06	0.000205481	yes	up	0	0	0	0.188594	0.170529	0.126555	0	0.161893	IQGAP2-201	LOW QUALITY PROTEIN: ras GTPase-activating-like protein IQGAP2 [Sus scrofa]	XP_020940121.1
Chr02_70929641_70942148	Pig.02543	0.0596182	-4.0681	0.0457534	0.256795	yes	down	0.0272157	0.0194414	0	0	0	0	0.0155524	0	SIMC1-201	SUMO-interacting motif-containing protein 1 isoform X1 [Sus scrofa]	XP_005661533.1
Chr02_80315127_80316205	Pig.12229	44.5363	5.47691	0.00127621	0.0198672	yes	up	0	0	0	0.102869	0.0767383	0.0813569	0	0.0869881	C3-201	complement C3 precursor [Sus scrofa]	XP_020936478.1
Chr02_82922894_82923383	Pig.19543	2.13448	1.09389	0.0306413	0.197713	yes	up	0.129275	0.0777657	0.0933472	0.38576	0.358112	0.27119	0.100129	0.338354	LDLR-201	low-density lipoprotein receptor precursor [Sus scrofa]	NP_001193283.1
Chr02_82934874_82936323	Pig.19543	3.72517	1.89731	0.0472453	0.261523	yes	up	0.0476275	0.0194414	0	0.171449	0.0937912	0.135595	0.0223563	0.133612	LDLR-201	low-density lipoprotein receptor precursor [Sus scrofa]	NP_001193283.1
Chr02_83909541_83910328	Pig.16212	61.4294	5.94086	1.30243e-05	0.000488005	yes	up	0	0	0	0.120014	0.162003	0.0813569	0	0.121125	LOC101123861	complement C3 [Sus scrofa]	XP_005654909.1
Chr02_84420990_84443541	Pig.16229	31.7407	4.98826	0.00117163	0.0188045	yes	up	0	0	0	0.0514346	0.110844	0.027119	0	0.0631326	Pm20d1	N-fatty-acyl-amino acid synthase/hydrolase PM20D1 isoform X1 [Sus scrofa]	XP_005654890.3
Chr02_84439685_84443541	Pig.16229	81.9888	6.35736	3.75139e-06	0.000181282	yes	up	0	0	0	0.102869	0.0937912	0.26215	0	0.152937	Pm20d1	N-fatty-acyl-amino acid synthase/hydrolase PM20D1 isoform X1 [Sus scrofa]	XP_005654890.3
Chr02_86895228_86897561	MSTRG.5373,Pig.20295	0.361413	-1.46828	0.00871774	0.0846505	yes	down	0.183706	0.0648048	0.100015	0.0342898	0.0937912	0.0632776	0.116175	0.0637862	#N/A	#N/A	#N/A
Chr02_92738870_92744854	MSTRG.5482	0.368591	-1.43991	9.90414e-10	1.79364e-07	yes	down	0.721217	0.375868	0.780116	0.368615	0.383691	0.307348	0.625734	0.353218	0	0	XP_020935332.1
Chr02_92989110_93068632	Pig.06424	1.16788e+07	23.4774	4.87188e-05	0.00144639	yes	up	0	0	0	3.35182	1.36424	0	0	1.57202	CYP4F8-201	cytochrome P450, family 4, subfamily F, polypeptide 55 isoform X3 [Sus scrofa]	XP_020935397.1
Chr02_93039238_93079314	Pig.06424	0.269201	-1.89324	0.0154666	0.126551	yes	down	0.544315	0.997994	1.02015	0.522919	0.170529	0.470062	0.854153	0.387837	CYP4F8-201	cytochrome P450, family 4, subfamily F, polypeptide 55 isoform X3 [Sus scrofa]	XP_020935397.1
Chr02_95718980_95719967	Pig.06334	0.40466	-1.30522	0.014075	0.118374	yes	down	0.0816472	0.0712853	0.11335	0.0342898	0.0426324	0.0903966	0.0887609	0.0557729	FKBP8-201	peptidyl-prolyl cis-trans isomerase FKBP8 isoform X1 [Sus scrofa]	XP_022353383.1
Chr02_96418304_96421395	MSTRG.5708,Pig.06308	0.451625	-1.1468	0.0399316	0.23607	yes	down	0.163294	0.116649	0.233368	0.162876	0.0682118	0.126555	0.171104	0.119214	#N/A	#N/A	#N/A
Chr03_108726174_108764668	Pig.18781	18.2858	4.19266	0.0200157	0.147953	yes	up	0	0	0	0.0342898	0.0255794	0.0451983	0	0.0350225	PARN-202	poly(A)-specific ribonuclease PARN isoform X1 [Sus scrofa]	XP_020942220.1(poly
Chr03_108839582_108909181		0.0703518	-3.82927	0.0484846	0.265541	yes	down	0.0884511	0.0777657	0.0933472	0	0	0.027119	0.0865214	0.00903966	#N/A	#N/A	#N/A
Chr03_109907028_109909284	MSTRG.9767	64.4833	6.01085	4.18553e-06	0.000191489	yes	up	0	0	0	0.180021	0.102318	0.0994362	0	0.127258	0	0	XP_020942219.1
Chr03_111561487_111577057	Pig.11639	0.307672	-1.70054	0.0180484	0.138498	yes	down	0.15649	0.0518438	0.120018	0.0171449	0.0682118	0.0632776	0.109451	0.0495448	SMG1-201	serine/threonine-protein kinase SMG1 isoform X1 [Sus scrofa]	XP_020942206.1
Chr03_111563853_111565521	Pig.11639	0.4737	-1.07795	0.0335476	0.209667	yes	down	0.0748433	0.0388829	0.126685	0.0685795	0.0682118	0.0361586	0.0801372	0.05765	SMG1-201	serine/threonine-protein kinase SMG1 isoform X1 [Sus scrofa]	XP_020942206.1
Chr03_116800433_116800867	Pig.16768	0.437802	-1.19165	0.00232029	0.0315153	yes	down	0.244942	0.12961	0.34005	0.137159	0.238741	0.0994362	0.238201	0.158446	TNRC6C-202	trinucleotide repeat-containing gene 6A protein isoform X4 [Sus scrofa]	XP_020936978.1
Chr03_118967715_118988965	Pig.17929	2.55613	1.35396	0.00136681	0.020926	yes	up	0.0680393	0.0388829	0.0666766	0.291463	0.187582	0.207912	0.0578663	0.228986	FAM120A-203	constitutive coactivator of PPAR-gamma-like protein 1 isoform X1 [Sus scrofa]	XP_020943836.1
Chr03_118983837_118988965	Pig.17929	2.8071	1.48908	0.000671469	0.0122831	yes	up	0.0340197	0.0583243	0.0733442	0.240028	0.2899	0.207912	0.0552294	0.245947	FAM120A-203	constitutive coactivator of PPAR-gamma-like protein 1 isoform X1 [Sus scrofa]	XP_020943836.1
Chr03_121945221_121948271		27.4385	4.77813	0.0333421	0.208936	yes	up	0	0	0	0	0.102318	0.0542379	0	0.0521852	#N/A	#N/A	#N/A
Chr03_123046084_123053024		0.0223291	-5.48493	0.0045293	0.0529997	yes	down	0.0680393	0.0194414	0.0600089	0	0	0	0.0491632	0	#N/A	#N/A	#N/A
Chr03_126059928_126060140	Pig.13729	0.204151	-2.29229	0.0498423	0.270253	yes	down	0.0680393	0	0.020003	0	0.0255794	0	0.0293474	0.00852647	AUTS2-203	autism susceptibility gene 2 protein [Sus scrofa]	NP_001233198.1
Chr03_126206126_126206928	Pig.21565	0.350696	-1.51171	0.0254536	0.173731	yes	down	0.0612354	0.0712853	0.180027	0.0514346	0.0426324	0.0723172	0.104182	0.0554614	ZNF713-201	zinc finger protein 713 [Sus scrofa]	XP_003124511.4
Chr03_126444700_126447071	Pig.21034	0.409499	-1.28807	0.0060682	0.0651552	yes	down	0.299373	0.259219	0.453401	0.154304	0.324006	0.171753	0.337331	0.216688	FBRS-201	probable fibrosin-1 [Sus scrofa]	XP_020942074.1
Chr03_133535537_133536497	Pig.09038,MSTRG.10344	0.276975	-1.85217	0.000999811	0.0168951	yes	down	0.170098	0.0648048	0.11335	0.0685795	0.0341059	0.0451983	0.116084	0.0492946	#N/A	#N/A	#N/A
Chr03_15287140_15331615		0.0466619	-4.42161	0.0104256	0.096049	yes	down	0.0408236	0.012961	0.0133353	0	0	0	0.0223733	0	#N/A	#N/A	#N/A
Chr03_17975082_17975842		0.0107367	-6.54131	0.00227214	0.0311394	yes	down	0.0884511	0.0712853	0.126685	0	0	0	0.095474	0	#N/A	#N/A	#N/A
Chr03_18351705_18377232	Pig.09345	7.29692	2.86729	0.0420892	0.245092	yes	up	0	0.012961	0	0.0857244	0.0426324	0.0451983	0.00432032	0.0578517	ATAD2B-201	ATPase family AAA domain-containing protein 2B isoform X1 [Sus scrofa]	XP_020943439.1
Chr03_18777200_18778722	Pig.09335	0.0418151	-4.57983	0.0122481	0.1063	yes	down	0.0204118	0.0194414	0.0333383	0	0	0	0.0243972	0	ITSN2-201	intersectin-2 isoform X1 [Sus scrofa]	XP_020944009.1
Chr03_20053404_20080765	Pig.20028	0.0632945	-3.98178	0.0097096	0.0915764	yes	down	0.0204118	0	0.0333383	0	0	0	0.0179167	0	ASXL2-201	putative Polycomb group protein ASXL2 isoform X1 [Sus scrofa]	XP_020943398.1
Chr03_25652991_25656804	Pig.06700	0.270727	-1.88509	0.0356291	0.21848	yes	down	0.0408236	0.0453634	0.0466736	0.0600071	0	0	0.0442869	0.0200024	MEMO1-201	protein MEMO1 isoform 1 [Homo sapiens]	XP_021109356.1
Chr03_26118523_26119127	Pig.06706	20.4804	4.35617	0.00468925	0.0540906	yes	up	0	0	0	0.0428622	0.0511588	0.027119	0	0.04038	BIRC6-201	LOW QUALITY PROTEIN: baculoviral IAP repeat-containing protein 6 [Sus scrofa]	XP_020943315.1
Chr03_30444359_30445305	MSTRG.8087	0.345164	-1.53464	0.00198417	0.0279274	yes	down	0.340197	0.194414	0.266706	0.128587	0.127897	0.171753	0.267106	0.142746	0	0	XP_003125283.3
Chr03_31031804_31049311	Pig.06727	79.9789	6.32155	1.77992e-06	9.86763e-05	yes	up	0	0	0	0.197166	0.127897	0.144634	0	0.156566	RMDN2-201	regulator of microtubule dynamics protein 2 isoform X1 [Sus scrofa]	XP_013851658.1
Chr03_38623681_38666459	Pig.08262	17.6024	4.1377	0.0467431	0.2602	yes	up	0	0	0	0.0428622	0.0341059	0.027119	0	0.0346957	NRXN1-201	neurexin-1 isoform X8 [Sus scrofa]	XP_020943899.1
Chr03_45601718_45637098	MSTRG.8253,Pig.04789,MSTRG.8254	3.61854	1.85541	6.79536e-10	1.31854e-07	yes	up	0.38102	0.142571	0.180027	1.32016	1.46655	1.139	0.234539	1.30857	#N/A	#N/A	#N/A
Chr03_48596408_48615983	Pig.04800	28.9124	4.85362	0.0242122	0.169081	yes	up	0	0	0	0.077152	0.0170529	0.0723172	0	0.0555074	USP34-201	ubiquitin carboxyl-terminal hydrolase 34 isoform X1 [Sus scrofa]	XP_020943148.1
Chr03_49877158_49914929	Pig.04812	0.032816	-4.92946	0.00234428	0.0316828	yes	down	0.0340197	0.012961	0.0533413	0	0	0	0.0334406	0	EHBP1-204	EH domain-binding protein 1 isoform X1 [Sus scrofa]	XP_020943128.1
Chr03_49988991_50034685	Pig.04812	0.190503	-2.39211	0.0189932	0.143013	yes	down	0.0680393	0.0194414	0.11335	0	0.0170529	0.0361586	0.0669436	0.0177372	EHBP1-204	EH domain-binding protein 1 isoform X1 [Sus scrofa]	XP_020943128.1
Chr03_50015679_50034685	Pig.04812	0.318024	-1.65279	0.0150819	0.124057	yes	down	0.183706	0.0518438	0.266706	0.077152	0.119371	0.0361586	0.167419	0.0775604	EHBP1-204	EH domain-binding protein 1 isoform X1 [Sus scrofa]	XP_020943128.1
Chr03_50973589_50974664	MSTRG.8330,Pig.04818	4.09073	2.03236	6.91345e-05	0.00195629	yes	up	0.0340197	0.0453634	0.0400059	0.231456	0.332532	0.216952	0.0397963	0.260313	#N/A	#N/A	#N/A
Chr03_5673086_5684674	Pig.15960	4.02983	2.01072	0.0084253	0.0830592	yes	up	0.0340197	0	0.020003	0.137159	0.14495	0.0451983	0.0180075	0.109102	PPM1A-201	LOW QUALITY PROTEIN: protein phosphatase 1B [Sus scrofa]	XP_015997703.1
Chr03_7487080_7504648	Pig.15947	23.1725	4.53434	0.0277011	0.183313	yes	up	0	0	0	0.0514346	0.0596853	0.027119	0	0.0460796	EML4-201	echinoderm microtubule-associated protein-like 4 isoform X4 [Sus scrofa]	XP_020943240.1
Chr03_75183979_75196214	Pig.13452	4.67407	2.22468	0.00307089	0.0393465	yes	up	0.0544315	0.0194414	0.0266706	0.188594	0.238741	0.280229	0.0335145	0.235855	IL1R1-202	interleukin-1 receptor type 1 isoform X1 [Sus scrofa]	XP_013851373.2
Chr03_76209366_76216392	Pig.09468,MSTRG.8682	3.14561	1.65334	0.0455271	0.256795	yes	up	0.0272157	0	0.0333383	0.111442	0.0937912	0.0723172	0.0201847	0.0925167	#N/A	#N/A	#N/A
Chr03_77822466_77840328	MSTRG.8700,Pig.09456	0.380342	-1.39463	0.00860299	0.0841013	yes	down	0.108863	0.0648048	0.120018	0.0942968	0.0341059	0.0451983	0.0978952	0.057867	#N/A	#N/A	#N/A
Chr03_79003261_79025856	Pig.09438	38.2868	5.25877	0.00313825	0.0400237	yes	up	0	0	0	0.0942968	0.0682118	0.0632776	0	0.0752621	VWA3B-202	von Willebrand factor A domain-containing protein 3B isoform X1 [Sus scrofa]	XP_020942889.1
Chr03_82677671_82678584	Pig.09378	0.37546	-1.41327	0.00254697	0.0339749	yes	down	0.183706	0.0972072	0.213365	0.0942968	0.136424	0.0542379	0.164759	0.0949861	TGOLN2	PREDICTED: trans-Golgi network integral membrane protein 2-like [Balaenoptera acutorostrata scammoni]	XP_022411752.1
Chr03_84651591_84655608	Pig.13165	17.6059	4.13799	0.0346624	0.214488	yes	up	0	0	0	0.0428622	0.0341059	0.027119	0	0.0346957	ZC3H6-201	zinc finger CCCH domain-containing protein 6 [Sus scrofa]	XP_020942684.1
Chr03_87999024_88009841	Pig.09063	0.0444281	-4.49238	0.0456751	0.256795	yes	down	0.0408236	0	0.0400059	0	0	0	0.0269432	0	CYTH3-201	cytohesin-3 isoform X1 [Sus scrofa]	XP_020941737.1
Chr03_89657255_89671619	MSTRG.9044,Pig.09102	86.2063	6.42972	2.64681e-06	0.000135661	yes	up	0	0	0	0.188594	0.110844	0.198872	0	0.166103	#N/A	#N/A	#N/A
Chr03_89663115_89671619	MSTRG.9044,Pig.09102	42.4559	5.40789	0.000124256	0.00324558	yes	up	0	0	0	0.111442	0.0767383	0.0632776	0	0.0838192	#N/A	#N/A	#N/A
Chr03_89667585_89671619	MSTRG.9044,Pig.09102	175.552	7.45576	6.33921e-09	9.0634e-07	yes	up	0	0	0	0.334325	0.375165	0.316388	0	0.341959	#N/A	#N/A	#N/A
Chr03_89677790_89686941	MSTRG.9044,Pig.09102	24.9473	4.64081	0.00391741	0.0472963	yes	up	0	0	0	0.0514346	0.0596853	0.0361586	0	0.0490929	#N/A	#N/A	#N/A
Chr03_89683944_89733650	MSTRG.9044	1.27328e+09	30.2459	3.48293e-08	3.71034e-06	yes	up	0	0	0	1.62019	1.67119	0	0	1.09713	0	0	AKO62660.1
Chr03_89787538_89792287	Pig.09104	79.0179	6.30411	4.54506e-06	0.000202404	yes	up	0	0	0	0.180021	0.127897	0.153674	0	0.153864	CYP3A29-207	cytochrome P450 CYP3A [Sus scrofa]	ACG76385.1
Chr03_89873248_89879377	Pig.09104	170.232	7.41136	9.27884e-09	1.22956e-06	yes	up	0	0	0	0.291463	0.383691	0.316388	0	0.330514	CYP3A29-207	cytochrome P450 CYP3A [Sus scrofa]	ACG76385.1
Chr03_98810789_98847046	Pig.10357	4.03311	2.01189	0.00465678	0.0539451	yes	up	0	0.0194414	0.0400059	0.077152	0.179056	0.117516	0.0198158	0.124574	CREBBP-201	CREB-binding protein [Sus scrofa]	XP_005662241.2
Chr03_98846333_98847046	Pig.10357	3.04931	1.60848	0.0155211	0.126806	yes	up	0.0612354	0.0388829	0	0.137159	0.187582	0.171753	0.0333728	0.165498	CREBBP-201	CREB-binding protein [Sus scrofa]	XP_005662241.2
Chr04_105715681_105725390	MSTRG.12320,Pig.01682,MSTRG.12319	15.1497	3.92122	0.0436971	0.251756	yes	up	0	0	0	0.0342898	0.0170529	0.0361586	0	0.0291671	#N/A	#N/A	#N/A
Chr04_107935367_107953064	Pig.01693	37.2739	5.22009	0.0310351	0.199779	yes	up	0	0	0	0.128587	0.0511588	0.0451983	0	0.0749812	DPYD-201	NR:NA	NP_999209.1
Chr04_110101379_110134080	Pig.01698	129.846	7.02066	2.29638e-08	2.59921e-06	yes	up	0	0	0	0.265746	0.341059	0.162714	0	0.256506	TLCD4-RWDD3	transmembrane protein 56 isoform X2 [Sus scrofa]	XP_020945824.1
Chr04_110124557_110134080	Pig.01698	66.971	6.06547	7.09615e-06	0.000296565	yes	up	0	0	0	0.180021	0.127897	0.0903966	0	0.132772	TLCD4-RWDD3	transmembrane protein 56 isoform X2 [Sus scrofa]	XP_020945824.1
Chr04_112634411_112648116	Pig.01723	0.0555483	-4.17011	0.0175292	0.137043	yes	down	0	0.0324024	0.0133353	0	0	0	0.0152459	0	RPAP2-201	putative RNA polymerase II subunit B1 CTD phosphatase RPAP2 [Sus scrofa]	XP_003125954.2
Chr04_117045483_117065883	MSTRG.12519,Pig.01753	37.2673	5.21984	0.00115784	0.0187219	yes	up	0	0	0	0.102869	0.0852647	0.0361586	0	0.0747642	#N/A	#N/A	#N/A
Chr04_117055265_117065883	MSTRG.12519,Pig.01753	10.2831	3.36221	0.018076	0.138515	yes	up	0	0	0.0133353	0.0685795	0.102318	0.0361586	0.0044451	0.0690186	#N/A	#N/A	#N/A
Chr04_118513508_118521288	Pig.01763	18.4133	4.20268	0.0198356	0.147061	yes	up	0	0	0	0.0171449	0.0426324	0.0451983	0	0.0349918	DDAH1-201	N(G),N(G)-dimethylarginine dimethylaminohydrolase 1 isoform X1 [Sus scrofa]	XP_020946001.1(N(G),N
Chr04_118647528_118648214	Pig.01766	65.978	6.04391	2.08417e-05	0.000708582	yes	up	0	0	0	0.137159	0.110844	0.135595	0	0.127866	SYDE2-201	LOW QUALITY PROTEIN: rho GTPase-activating protein SYDE2 [Sus scrofa]	XP_001928259.4
Chr04_13085270_13092315	Pig.03742	2.85433	1.51315	0.0311068	0.199916	yes	up	0.0408236	0.0194414	0.0333383	0.0942968	0.136424	0.171753	0.0312011	0.134158	ENPP2-201	ectonucleotide pyrophosphatase/phosphodiesterase family member 2 isoform X1 [Sus scrofa]	XP_013851977.1
Chr04_22743270_22752539	Pig.03771	4.71338	2.23676	0.0109293	0.0986356	yes	up	0.0136079	0	0.0133353	0.077152	0.0511588	0.0632776	0.00898106	0.0638628	EMC2-201	ER membrane protein complex subunit 2 isoform X4 [Sus scrofa]	XP_020944677.1
Chr04_22743270_22773855	Pig.03771	4.22439	2.07874	0.00228115	0.0311394	yes	up	0.0272157	0.0324024	0.0266706	0.162876	0.221688	0.198872	0.0287629	0.194479	EMC2-201	ER membrane protein complex subunit 2 isoform X4 [Sus scrofa]	XP_020944677.1
Chr04_22763380_22773855	Pig.03771	2.25463	1.17289	0.0201434	0.148493	yes	up	0.0816472	0.0453634	0.100015	0.342898	0.238741	0.207912	0.0756751	0.263184	EMC2-201	ER membrane protein complex subunit 2 isoform X4 [Sus scrofa]	XP_020944677.1
Chr04_28268052_28272728	MSTRG.10816,Pig.08101	173.235	7.43659	7.29339e-09	1.01603e-06	yes	up	0	0	0	0.660078	0.230215	0.162714	0	0.351002	#N/A	#N/A	#N/A
Chr04_29129287_29153365	Pig.08103	0.309521	-1.69189	0.0013852	0.0210807	yes	down	0.176902	0.0972072	0.166691	0.0600071	0.0682118	0.0813569	0.146934	0.0698586	ZFPM2-204	zinc finger protein ZFPM2 [Sus scrofa]	NP_001182303.1
Chr04_30299278_30342356	Pig.08107	0.10318	-3.27677	0.00203829	0.0285645	yes	down	0.0476275	0.0712853	0.0800119	0.0171449	0.0170529	0	0.0663082	0.0113993	OXR1-205	oxidation resistance protein 1 isoform X4 [Sus scrofa]	XP_013852007.1
Chr04_36790993_36805402	Pig.01495	19.0376	4.25078	0.0118162	0.10388	yes	up	0	0	0	0.0428622	0.0426324	0.027119	0	0.0375378	WWP1-201	NEDD4-like E3 ubiquitin-protein ligase WWP1 isoform X1 [Sus scrofa]	XP_005663042.1
Chr04_36801646_36805402	Pig.01495	8.56998	3.09929	0.0449698	0.255834	yes	up	0	0	0	0.0257173	0.0255794	0	0	0.0170989	WWP1-201	NEDD4-like E3 ubiquitin-protein ligase WWP1 isoform X1 [Sus scrofa]	XP_005663042.1
Chr04_36807602_36836417	Pig.01495	9.18567	3.19938	0.0312377	0.200371	yes	up	0	0	0.020003	0.0857244	0.187582	0	0.00666766	0.0911023	WWP1-201	NEDD4-like E3 ubiquitin-protein ligase WWP1 isoform X1 [Sus scrofa]	XP_005663042.1
Chr04_36821977_36836417	Pig.01495	8.52503	3.09171	4.78696e-05	0.00142899	yes	up	0.0408236	0	0.0133353	0.137159	0.349585	0.189833	0.018053	0.225526	WWP1-201	NEDD4-like E3 ubiquitin-protein ligase WWP1 isoform X1 [Sus scrofa]	XP_005663042.1
Chr04_36821977_36851349	Pig.01495	18.9578	4.24472	0.0239313	0.167766	yes	up	0	0	0	0.0514346	0.0341059	0.027119	0	0.0375532	WWP1-201	NEDD4-like E3 ubiquitin-protein ligase WWP1 isoform X1 [Sus scrofa]	XP_005663042.1
Chr04_36836233_36851349	Pig.01495	6.73731	2.75217	0.0140215	0.118236	yes	up	0.0136079	0.0194414	0	0.222883	0.136424	0.0451983	0.0110164	0.134835	WWP1-201	NEDD4-like E3 ubiquitin-protein ligase WWP1 isoform X1 [Sus scrofa]	XP_005663042.1
Chr04_36861805_36875034		34.146	5.09365	0.000527001	0.0100112	yes	up	0	0	0	0.077152	0.110844	0.0180793	0	0.0686918	#N/A	#N/A	#N/A
Chr04_42637595_42638483	Pig.01470	0.0548174	-4.18922	5.01234e-05	0.00148	yes	down	0.149687	0.0972072	0.0533413	0	0	0.027119	0.100078	0.00903966	ZBTB10-201	zinc finger and BTB domain-containing protein 10 isoform X1 [Sus scrofa]	XP_001928312.1
Chr04_48625429_48666494		2.22144	1.15149	0.0117633	0.103581	yes	up	0.0544315	0.012961	0.100015	0.197166	0.204635	0.153674	0.0558024	0.185159	#N/A	#N/A	#N/A
Chr04_48646096_48666494	Pig.01448	20.9927	4.39182	0.00303182	0.0391256	yes	up	0	0	0	0.0428622	0.0341059	0.0451983	0	0.0407221	STAU2-203	double-stranded RNA-binding protein Staufen homolog 2 isoform X7 [Sus scrofa]	XP_020944868.1
Chr04_51710217_51714419	Pig.01430	6.56172	2.71407	0.0178071	0.137043	yes	up	0	0	0.020003	0.077152	0.0937912	0.027119	0.00666766	0.0660207	NCOA2-204	nuclear receptor coactivator 2 [Sus scrofa]	NP_001107747.1
Chr04_54218624_54228068	Pig.01421	0.453368	-1.14124	8.38195e-05	0.00232343	yes	down	0.755237	0.738775	1.66691	0.985831	0.690644	0.560459	1.05364	0.745645	CSPP1-208	centrosome and spindle pole-associated protein 1 isoform X1 [Sus scrofa]	XP_013852149.1
Chr04_55472441_55495387		2.63292	1.39667	0.0267951	0.179504	yes	up	0.0680393	0.0259219	0.0333383	0.128587	0.272847	0.117516	0.0424332	0.172983	#N/A	#N/A	#N/A
Chr04_58498565_58501388	Pig.14062,MSTRG.11105	0.246526	-2.02019	2.61875e-07	1.93944e-05	yes	down	0.435452	0.259219	0.460068	0.137159	0.196109	0.108476	0.384913	0.147248	#N/A	#N/A	#N/A
Chr04_58547233_58562535	Pig.14062,MSTRG.11105	0.207334	-2.26997	0.0394812	0.233917	yes	down	0.0952551	0.0259219	0.0533413	0	0.0255794	0.027119	0.0581727	0.0175661	#N/A	#N/A	#N/A
Chr04_60923348_60923925	Pig.14072	34.6555	5.11501	2.05671e-05	0.000707221	yes	up	0	0.012961	0	0.300035	0.238741	0.225991	0.00432032	0.254923	CYP7A1-201	cholesterol 7-alpha-monooxygenase isoform X1 [Sus scrofa]	XP_020944405.1
Chr04_66658600_66674205	MSTRG.11201,Pig.04915	12.8933	3.68855	0.022078	0.158245	yes	up	0.0136079	0	0	0.0942968	0.0426324	0.117516	0.00453596	0.0848149	#N/A	#N/A	#N/A
Chr04_66745876_66758678	MSTRG.11201,Pig.04915	22.0498	4.46269	0.000733976	0.0132043	yes	up	0.0136079	0	0	0.120014	0.213162	0.117516	0.00453596	0.150231	#N/A	#N/A	#N/A
Chr04_67550881_67619743	Pig.04920	0.155124	-2.6885	0.000309263	0.00665026	yes	down	0.183706	0.13609	0.0933472	0.0428622	0.0170529	0.0451983	0.137714	0.0350378	KIFAP3-201	kinesin-associated protein 3 isoform X2 [Sus scrofa]	XP_001927795.3
Chr04_67998566_68004542	Pig.04929	36.7721	5.20054	0.000704871	0.0128079	yes	up	0	0	0	0.0428622	0.0767383	0.0903966	0	0.069999	F5-201	coagulation factor V precursor [Sus scrofa]	NP_999285.1
Chr04_75909038_75909407		0.346309	-1.52987	2.59802e-05	0.000850305	yes	down	0.244942	0.174973	0.440065	0.197166	0.170529	0.0903966	0.28666	0.152697	#N/A	#N/A	#N/A
Chr04_76964647_76965737	Pig.10649	0.0187548	-5.73659	0.00144363	0.0217868	yes	down	0.0408236	0.0388829	0.0866795	0	0	0	0.055462	0	NCSTN-201	nicastrin isoform X1 [Sus scrofa]	XP_001928821.1
Chr04_81085867_81090155	Pig.10528	0.495264	-1.01373	0.00855878	0.0839347	yes	down	0.374216	0.2657	0.280042	0.265746	0.298427	0.171753	0.306653	0.245309	GON4L	GON-4-like protein isoform X1 [Sus scrofa]	XP_020945357.1
Chr04_81182357_81195763		4.96824	2.31273	0.000420348	0.00838793	yes	up	0.0136079	0.012961	0.0533413	0.231456	0.281374	0.0994362	0.0266367	0.204089	#N/A	#N/A	#N/A
Chr04_88434469_88438102	Pig.13005	0.300238	-1.73582	0.0369667	0.224293	yes	down	0.0816472	0.0648048	0.0666766	0.0514346	0.0255794	0.027119	0.0710429	0.034711	NOTCH2-201	neurogenic locus notch homolog protein 2 isoform X2 [Sus scrofa]	XP_020946348.1
Chr04_93596428_93597409	Pig.15772	19.2075	4.2636	0.00191956	0.0275419	yes	up	0	0	0	0.0600071	0.0170529	0.0361586	0	0.0377396	TRIM33-201	E3 ubiquitin-protein ligase TRIM33 isoform X1 [Sus scrofa]	XP_020945665.1
Chr04_9772083_9785803		7.72092	2.94877	0.0162168	0.130505	yes	up	0.0136079	0	0	0.0514346	0.110844	0	0.00453596	0.0540929	#N/A	#N/A	#N/A
Chr04_98096686_98108020		2.03994e-06	-18.903	0.00843954	0.0830592	yes	down	0	0.0583243	0	0	0	0	0.0194414	0	#N/A	#N/A	#N/A
Chr05_100664210_100668705	Pig.11743	2.88988	1.53101	0.00130018	0.0201826	yes	up	0.115667	0.0388829	0.146688	0.42005	0.511588	0.361586	0.100413	0.431075	PAWR-201	PREDICTED: PRKC apoptosis WT1 regulator protein [Felis catus]	XP_020948471.1
Chr05_104214626_104274170	MSTRG.14747	4.77999	2.25701	0.0472022	0.261523	yes	up	0.0136079	0	0.0266706	0.0514346	0.127897	0.0903966	0.0134262	0.0899094	0	0	XP_020947997.1
Chr05_104253525_104255276	MSTRG.14747	3.81074	1.93007	0.0155675	0.126933	yes	up	0.0272157	0.012961	0.0133353	0.162876	0.0767383	0.0813569	0.0178373	0.106991	0	0	XP_020947997.1
Chr05_104505741_104506134	Pig.13247	0.31019	-1.68878	0.00536109	0.0596707	yes	down	0.183706	0.0518438	0.160024	0.0942968	0.0341059	0.0542379	0.131858	0.0608802	LRP6-201	LOW QUALITY PROTEIN: low-density lipoprotein receptor-related protein 6 [Sus scrofa]	XP_020948003.1
Chr05_104558652_104586660	Pig.13247	0.10817	-3.20862	0.00239274	0.0321776	yes	down	0.0816472	0.0712853	0.100015	0.0257173	0	0.0180793	0.0843158	0.0145989	LRP6-201	LOW QUALITY PROTEIN: low-density lipoprotein receptor-related protein 6 [Sus scrofa]	XP_020948003.1
Chr05_104579027_104586660	Pig.13247	0.187401	-2.4158	0.0194825	0.145197	yes	down	0.0748433	0.012961	0.0800119	0	0.0170529	0.027119	0.0559387	0.014724	LRP6-201	LOW QUALITY PROTEIN: low-density lipoprotein receptor-related protein 6 [Sus scrofa]	XP_020948003.1
Chr05_106667069_106690377	Pig.13290,MSTRG.14805	38.4913	5.26646	0.00227641	0.0311394	yes	up	0	0	0	0.0685795	0.0937912	0.0632776	0	0.0752161	#N/A	#N/A	#N/A
Chr05_106668101_106696417	Pig.13290,MSTRG.14805	25.6192	4.67915	0.044172	0.253418	yes	up	0	0	0	0.0514346	0.0852647	0.0180793	0	0.0515929	#N/A	#N/A	#N/A
Chr05_106686520_106690377	Pig.13290,MSTRG.14805	32.5111	5.02286	0.0129619	0.111076	yes	up	0	0	0	0.0685795	0.0682118	0.0542379	0	0.0636764	#N/A	#N/A	#N/A
Chr05_106696908_106702791	Pig.13290,MSTRG.14805	82.8856	6.37305	0.000150856	0.00377697	yes	up	0	0	0	0.31718	0.0852647	0.0994362	0	0.167294	#N/A	#N/A	#N/A
Chr05_106754199_106756664	Pig.13291,MSTRG.14807	60.4374	5.91737	2.03158e-05	0.000703031	yes	up	0	0	0	0.128587	0.179056	0.0542379	0	0.120627	#N/A	#N/A	#N/A
Chr05_20526478_20580658	Pig.19106	0.248257	-2.0101	0.00143071	0.0216519	yes	down	0.108863	0.110168	0.153356	0.0514346	0.0511588	0.0451983	0.124129	0.0492639	TBC1D22A-201	LOW QUALITY PROTEIN: TBC1 domain family member 22A [Sus scrofa]	XP_020947020.1
Chr05_20526478_20598492	Pig.19106	0.321414	-1.63749	0.0263234	0.177153	yes	down	0.142883	0.0388829	0.120018	0.0857244	0.0426324	0.0180793	0.100594	0.048812	TBC1D22A-201	LOW QUALITY PROTEIN: TBC1 domain family member 22A [Sus scrofa]	XP_020947020.1
Chr05_24192981_24197706	Pig.14028	0.0443082	-4.49628	0.0355706	0.218367	yes	down	0.0408236	0	0.0400059	0	0	0	0.0269432	0	ARFGAP3-201	ADP-ribosylation factor GTPase-activating protein 3 isoform X1 [Sus scrofa]	XP_003481574.1
Chr05_24204646_24215675	Pig.14028	17.6254	4.13958	0.0494011	0.268396	yes	up	0	0	0	0.0942968	0.0170529	0	0	0.0371166	ARFGAP3-201	ADP-ribosylation factor GTPase-activating protein 3 isoform X1 [Sus scrofa]	XP_003481574.1
Chr05_24764465_24765873		0.305255	-1.71191	0.0015595	0.023341	yes	down	0.163294	0.0518438	0.100015	0.0685795	0.0511588	0.027119	0.105051	0.0489524	#N/A	#N/A	#N/A
Chr05_25794915_25795215	Pig.18991	0.0573378	-4.12437	0.0233909	0.165042	yes	down	0.0272157	0.012961	0.0133353	0	0	0	0.0178373	0	ITGA7-201	LOW QUALITY PROTEIN: integrin alpha-7 [Sus scrofa]	XP_020946892.1
Chr05_28637762_28651868	Pig.17270	18.9858	4.24685	8.40723e-06	0.000340869	yes	up	0.0136079	0.0194414	0	0.282891	0.554221	0.235031	0.0110164	0.357381	RBMS2-201	RNA-binding motif, single-stranded-interacting protein 2 [Sus scrofa]	XP_020948550.1
Chr05_28637762_28690035		34.8941	5.12491	0.0301325	0.195125	yes	up	0	0	0	0.077152	0.0852647	0.0451983	0	0.069205	#N/A	#N/A	#N/A
Chr05_28687240_28690035		50.8265	5.66751	9.86499e-05	0.00266649	yes	up	0	0	0	0.188594	0.0852647	0.0361586	0	0.103339	#N/A	#N/A	#N/A
Chr05_31301375_31326900	Pig.05460	0.20152	-2.311	0.0212411	0.154276	yes	down	0.0408236	0.0518438	0.0333383	0	0.0426324	0	0.0420019	0.0142108	XPOT-201	exportin-T isoform X1 [Sus scrofa]	XP_020947599.1
Chr05_31319211_31326900	Pig.05460	0.0722147	-3.79156	0.0222837	0.159299	yes	down	0.0272157	0	0.020003	0	0	0	0.0157396	0	XPOT-201	exportin-T isoform X1 [Sus scrofa]	XP_020947599.1
Chr05_32183948_32204945		0.0637301	-3.97188	0.0121375	0.105846	yes	down	0.0204118	0	0.0333383	0	0	0	0.0179167	0	#N/A	#N/A	#N/A
Chr05_32183948_32242667		0.0311657	-5.0039	0.0016345	0.024234	yes	down	0.0204118	0.0583243	0	0	0	0	0.0262454	0	#N/A	#N/A	#N/A
Chr05_33008943_33026515	Pig.05474	4.8034	2.26406	0.000408963	0.00825984	yes	up	0.0204118	0.0259219	0.0400059	0.248601	0.204635	0.198872	0.0287799	0.21737	IRAK3-201	interleukin-1 receptor-associated kinase 3 [Sus scrofa]	XP_020947619.1
Chr05_36457974_36459199	Pig.05498	9.0308	3.17485	0.000131935	0.00341335	yes	up	0.0408236	0	0.0333383	0.171449	0.656538	0.144634	0.0247206	0.324207	RAB3IP	rab-3A-interacting protein isoform X1 [Sus scrofa]	XP_020947636.1
Chr05_43684815_43735400	Pig.06613	37.6346	5.23399	0.00955605	0.0905245	yes	up	0	0	0	0	0.110844	0.0994362	0	0.0700935	FGD4	FYVE, RhoGEF and PH domain-containing protein 4 isoform X1 [Sus scrofa]	XP_020947725.1
Chr05_43684815_43744217	Pig.06613	53.7705	5.74874	1.15876e-05	0.000452917	yes	up	0	0	0	0.111442	0.0937912	0.108476	0	0.10457	FGD4	FYVE, RhoGEF and PH domain-containing protein 4 isoform X1 [Sus scrofa]	XP_020947725.1
Chr05_43729794_43735400	Pig.06613	22.3528	4.48238	0.0105561	0.0969991	yes	up	0	0	0	0.0600071	0.0255794	0.0451983	0	0.0435949	FGD4	FYVE, RhoGEF and PH domain-containing protein 4 isoform X1 [Sus scrofa]	XP_020947725.1
Chr05_43729794_43744217	Pig.06613	39.1287	5.29015	0.000953914	0.0164528	yes	up	0	0	0	0.0857244	0.102318	0.0451983	0	0.0777468	FGD4	FYVE, RhoGEF and PH domain-containing protein 4 isoform X1 [Sus scrofa]	XP_020947725.1
Chr05_44746479_44761669	Pig.06608	6.87817	2.78203	0.000745905	0.0133306	yes	up	0.0272157	0	0.0400059	0.188594	0.230215	0.235031	0.0224072	0.217947	DENND5B-201	DENN domain-containing protein 5B isoform X1 [Sus scrofa]	XP_020947749.1
Chr05_4770639_4793901	Pig.17058	0.197533	-2.33983	0.00897695	0.0858658	yes	down	0.0544315	0.0453634	0.0400059	0	0.0170529	0.027119	0.0466003	0.014724	RBFOX2-202	RNA binding protein fox-1 homolog 2 isoform X11 [Sus scrofa]	XP_024599261.1
Chr05_47989526_48010312	Pig.06594	17.3687	4.11842	0.0245222	0.169935	yes	up	0	0	0	0.0342898	0.0511588	0.0180793	0	0.0345093	MRPS35-202	28S ribosomal protein S35, mitochondrial [Sus scrofa]	NP_001231856.1
Chr05_48391369_48407553	Pig.06589	0.00609259	-7.35873	1.14585e-07	9.88163e-06	yes	down	0.204118	0.155531	0.120018	0	0	0	0.159889	0	ARNTL2-201	aryl hydrocarbon receptor nuclear translocator-like protein 2 isoform X1 [Sus scrofa]	XP_020947810.1
Chr05_48391369_48424370	Pig.06589	0.016274	-5.94128	0.000873266	0.0151097	yes	down	0.0612354	0.0324024	0.106683	0	0	0	0.0667734	0	ARNTL2-201	aryl hydrocarbon receptor nuclear translocator-like protein 2 isoform X1 [Sus scrofa]	XP_020947810.1
Chr05_51807575_51853508	Pig.06573	17.1933	4.10377	0.00133885	0.0206647	yes	up	0	0	0.020003	0.145731	0.196109	0.153674	0.00666766	0.165172	SOX5-201	transcription factor SOX-5 isoform X2 [Sus scrofa]	XP_020948580.1
Chr05_51853298_51855700	Pig.06573	25.9606	4.69825	0.00752657	0.0764333	yes	up	0	0	0	0.0600071	0.0682118	0.027119	0	0.0517793	SOX5-201	transcription factor SOX-5 isoform X2 [Sus scrofa]	XP_020948580.1
Chr05_51935997_51953715	Pig.06573	10.3635	3.37344	6.50628e-05	0.00186045	yes	up	0.0204118	0.0259219	0.0666766	0.70294	0.716224	0.406784	0.0376701	0.608649	SOX5-201	transcription factor SOX-5 isoform X2 [Sus scrofa]	XP_020948580.1
Chr05_53091529_53106088	Pig.06570	0.0262372	-5.25224	0.00163701	0.024234	yes	down	0.0340197	0.0259219	0.0600089	0	0	0	0.0399835	0	C2CD5-201	C2 domain-containing protein 5 isoform X4 [Sus scrofa]	XP_020947875.1
Chr05_54141653_54170120	MSTRG.13889,Pig.09598	111.04	6.79494	5.27847e-07	3.41404e-05	yes	up	0	0	0	0.188594	0.281374	0.180793	0	0.21692	#N/A	#N/A	#N/A
Chr05_54154165_54170120	MSTRG.13889,Pig.09598	33.8475	5.08098	0.0186616	0.141604	yes	up	0	0	0	0.077152	0.110844	0.0180793	0	0.0686918	#N/A	#N/A	#N/A
Chr05_55847922_55854495	Pig.09594	17.4083	4.1217	0.047734	0.262819	yes	up	0	0	0	0.0257173	0.0596853	0.0180793	0	0.034494	PLEKHA5-204	pleckstrin homology domain-containing family A member 5 isoform X6 [Sus scrofa]	XP_020947923.1
Chr05_60044208_60046171	Pig.09568	0.0516073	-4.27628	0.0149002	0.123424	yes	down	0.0408236	0	0.0266706	0	0	0	0.0224981	0	ATF7IP-202	activating transcription factor 7-interacting protein 1 isoform X1 [Sus scrofa]	XP_005664117.1
Chr05_60053380_60062312	Pig.09568	2.44311	1.28872	0.0443897	0.25413	yes	up	0.0408236	0.0259219	0.0666766	0.205739	0.179056	0.117516	0.044474	0.167437	ATF7IP-202	activating transcription factor 7-interacting protein 1 isoform X1 [Sus scrofa]	XP_005664117.1
Chr05_65803355_65828340		19.7436	4.30332	0.0380047	0.227651	yes	up	0	0	0	0.0342898	0.0341059	0.0451983	0	0.0378646	#N/A	#N/A	#N/A
Chr05_68026189_68027246	Pig.07513	0.270917	-1.88408	0.00643599	0.067765	yes	down	0.0748433	0.0842462	0.100015	0.0257173	0.0511588	0.0361586	0.0863681	0.0376783	CECR2-201	LOW QUALITY PROTEIN: cat eye syndrome critical region protein 2 [Sus scrofa]	XP_020948162.1
Chr05_75858259_75868552	MSTRG.14257	37.8384	5.24178	0.00843892	0.0830592	yes	up	0	0	0	0.0171449	0.0852647	0.108476	0	0.0702952	0	0	XP_020948239.1
Chr05_78171662_78194922	Pig.13110	15.8418	3.98566	0.00400459	0.0479228	yes	up	0.0136079	0	0	0.102869	0.119371	0.0994362	0.00453596	0.107225	SLC41A2-201	LOW QUALITY PROTEIN: solute carrier family 41 member 2 [Sus scrofa]	XP_005664240.2
Chr05_79182843_79198779	Pig.13120	52.1361	5.70421	2.82925e-05	0.000920437	yes	up	0	0	0	0.111442	0.14495	0.0542379	0	0.103543	NT5DC3-201	LOW QUALITY PROTEIN: 5'-nucleotidase domain-containing protein 3 [Sus scrofa]	XP_005664246.2
Chr05_81215241_81234546	Pig.04043	0.162162	-2.6245	0.00170333	0.0250113	yes	down	0.122471	0.0777657	0.106683	0.0342898	0.0170529	0.027119	0.102306	0.0261539	GNPTAB-201	N-acetylglucosamine-1-phosphotransferase subunits alpha/beta isoform X6 [Sus scrofa]	XP_020948331.1
Chr05_84175407_84176240	MSTRG.14449,Pig.04063	0.411065	-1.28256	0.0171645	0.135348	yes	down	0.19051	0.0972072	0.160024	0.077152	0.14495	0.0632776	0.149247	0.0951265	#N/A	#N/A	#N/A
Chr05_86446353_86447618	MSTRG.14491	80.5722	6.33221	0.000148028	0.00372331	yes	up	0	0	0	0.171449	0.187582	0.117516	0	0.158849	0	0	XP_001925096.2
Chr05_99164719_99181403	MSTRG.14656,Pig.11752	3.93482	1.9763	0.00102799	0.0171033	yes	up	0.0748433	0	0.0400059	0.257173	0.324006	0.0903966	0.0382831	0.223859	#N/A	#N/A	#N/A
Chr05_99164719_99208044	MSTRG.14656,Pig.11752	17.3221	4.11454	0.0062496	0.0665766	yes	up	0	0	0.0133353	0.171449	0.0937912	0.0813569	0.0044451	0.115532	#N/A	#N/A	#N/A
Chr05_99227727_99243976	MSTRG.14656,Pig.11752	31.1555	4.96141	0.00099545	0.0168951	yes	up	0	0	0	0.0600071	0.0682118	0.0542379	0	0.0608189	#N/A	#N/A	#N/A
Chr06_101705365_101714538	Pig.08532	0.188943	-2.40398	0.000625764	0.0115639	yes	down	0.176902	0.110168	0.100015	0.0428622	0.0767383	0	0.129028	0.0398668	RERE	arginine-glutamic acid dipeptide (RE) repeats, isoform CRA_c [Homo sapiens]	ELR58553.1
Chr06_101805189_101814144	Pig.08532	84.9753	6.40897	0.00035203	0.00727215	yes	up	0	0	0	0.197166	0.0937912	0.198872	0	0.163277	RERE	arginine-glutamic acid dipeptide (RE) repeats, isoform CRA_c [Homo sapiens]	ELR58553.1
Chr06_101805189_101839069	Pig.08532	68.8126	6.1046	0.000113039	0.00296686	yes	up	0	0	0	0.154304	0.196109	0.0632776	0	0.137897	RERE	arginine-glutamic acid dipeptide (RE) repeats, isoform CRA_c [Homo sapiens]	ELR58553.1
Chr06_10288787_10295546	Pig.14717	5.67746	2.50525	0.0301133	0.195125	yes	up	0.0340197	0	0	0.0514346	0.136424	0.0903966	0.0113399	0.0927516	ZYG11B-201	protein zyg-11 homolog B [Sus scrofa]	XP_020952290.1
Chr06_108820298_108820413	Pig.16623	115.226	6.84832	3.73944e-07	2.63849e-05	yes	up	0	0	0	0.308608	0.255794	0.126555	0	0.230319	A1BG	alpha-1B-glycoprotein [Sus scrofa]	XP_003128180.1
Chr06_111135956_111136466	Pig.16861	0.0443426	-4.49516	0.0381568	0.228059	yes	down	0.0408236	0	0.0400059	0	0	0	0.0269432	0	ZNF583-202	zinc finger protein 583 isoform X3 [Sus scrofa]	XP_020950753.1
Chr06_11538093_11556397		0.0171698	-5.86398	8.77936e-05	0.0023969	yes	down	0.0476275	0.0453634	0.0866795	0	0	0	0.0598901	0	#N/A	#N/A	#N/A
Chr06_119036106_119051091	Pig.17188	0.248326	-2.00969	0.0219175	0.157511	yes	down	0.0680393	0.0583243	0.0933472	0.0257173	0.0426324	0.0180793	0.0732369	0.0288097	SAE1-205	SUMO-activating enzyme subunit 1 isoform X1 [Sus scrofa]	XP_003127291.1
Chr06_119254850_119273969	MSTRG.17506	0.0470054	-4.41103	0.0173153	0.135945	yes	down	0.0340197	0.012961	0.020003	0	0	0	0.0223279	0	0	0	XP_020950281.1
Chr06_12458471_12462570	Pig.12444	41.5025	5.37513	4.11839e-06	0.000191489	yes	up	0.0136079	0	0	0.368615	0.264321	0.225991	0.00453596	0.286309	DHCR24-202	delta(24)-sterol reductase [Sus scrofa]	NP_001230283.1(delta
Chr06_127929326_127934404	Pig.15970	0.410231	-1.28549	0.0363675	0.222255	yes	down	0.0544315	0.0648048	0.120018	0.0342898	0.102318	0.0180793	0.0797514	0.0515623	UBA2	PREDICTED: SUMO-activating enzyme subunit 2 [Vicugna pacos]	XP_006217089.1
Chr06_134537417_134627211	Pig.13994	0.335934	-1.57375	0.0274221	0.181688	yes	down	0.0884511	0.0518438	0.0733442	0.0428622	0.0426324	0.027119	0.0712131	0.0375378	PHKB-201	phosphorylase b kinase regulatory subunit beta isoform X5 [Sus scrofa]	XP_020949897.1
Chr06_137024884_137029577	Pig.15005	0.112669	-3.14984	0.000966231	0.01656	yes	down	0.0272157	0.0712853	0.0866795	0	0.0341059	0	0.0617268	0.0113686	HEATR3-201	HEAT repeat-containing protein 3 isoform X1 [Sus scrofa]	XP_020949878.1
Chr06_140002715_140003504	Pig.14992	0.0462729	-4.43369	0.0148463	0.123334	yes	down	0	0.0194414	0.0466736	0	0	0	0.0220383	0	RBL2-201	retinoblastoma-like protein 2 isoform X2 [Sus scrofa]	XP_020949827.1
Chr06_141789140_141864082		158.093	7.30463	0.000222457	0.00527777	yes	up	0.0272157	0	0.0533413	9.3011	0	7.32212	0.0268523	5.54107	#N/A	#N/A	#N/A
Chr06_14232183_14246715	Pig.12450	2.16274	1.11286	0.0316061	0.201781	yes	up	0.0680393	0.0194414	0.0133353	0.120014	0.153477	0.0632776	0.0336054	0.112256	PRKAA2-201	5'-AMP-activated protein kinase catalytic subunit alpha-2 [Sus scrofa]	NP_999431.1
Chr06_143325041_143395663	MSTRG.18290	0.0436116	-4.51915	0.029222	0.190966	yes	down	0.0272157	0.0324024	0	0	0	0	0.0198727	0	0	0	XP_020949782.1
Chr06_143340685_143395663	MSTRG.18296,MSTRG.18290,Pig.14278	0.0223895	-5.48103	0.00193143	0.0275419	yes	down	0.0544315	0.0388829	0.0400059	0	0	0	0.0444401	0	#N/A	#N/A	#N/A
Chr06_143795848_143796187		0.0627052	-3.99527	0.0131346	0.111651	yes	down	0.0816472	0.0518438	0.0533413	0	0	0.0180793	0.0622774	0.00602644	#N/A	#N/A	#N/A
Chr06_14381044_14387920	Pig.12451	52.5081	5.71447	0.000521447	0.00997543	yes	up	0	0	0	0.128587	0.153477	0.0361586	0	0.106074	FYB2-201	activation-dependent, raft-recruited ADAP-like phosphoprotein isoform X1 [Sus scrofa]	XP_020952236.1
Chr06_144070611_144094877	Pig.14246	0.0277847	-5.16957	0.0149826	0.123709	yes	down	0.0408236	0.0324024	0.0333383	0	0	0	0.0355214	0	LRRC36-201	leucine-rich repeat-containing protein 36 isoform X2 [Sus scrofa]	XP_003126990.1
Chr06_14477450_14494363	MSTRG.15243	32.0492	5.00222	0.000479054	0.00926228	yes	up	0	0	0	0.0171449	0.14495	0.027119	0	0.0630713	0	0	NP_001090919.2
Chr06_153612359_153623429	MSTRG.18532	258.553	8.01431	0.00034549	0.00716429	yes	up	0	0	0	0	0.46043	0.931084	0	0.463838	0	0	XP_020949549.1
Chr06_153612359_153633119		98.3134	6.61932	0.000468363	0.00908792	yes	up	0	0	0	0.274318	0.187582	0.126555	0	0.196152	#N/A	#N/A	#N/A
Chr06_153617949_153633119		33.256	5.05554	0.00627435	0.0667095	yes	up	0	0	0	0.0600071	0.0596853	0.0723172	0	0.0640032	#N/A	#N/A	#N/A
Chr06_154116588_154120137	Pig.12804	13.7557	3.78196	0.0340465	0.211158	yes	up	0	0	0	0.0257173	0.0170529	0.0361586	0	0.0263096	CDH1-203	cadherin-1 precursor [Sus scrofa]	NP_001156532.1
Chr06_154848646_154859605	Pig.12817	0.384706	-1.37817	0.0202766	0.148869	yes	down	0.136079	0.0972072	0.180027	0.0942968	0.0511588	0.0994362	0.137771	0.0816306	NFAT5-203	nuclear factor of activated T-cells 5 isoform X3 [Sus scrofa]	XP_003355818.1
Chr06_155000411_155008064		13.7839	3.78491	5.15666e-08	5.18817e-06	yes	up	0	0.0259219	0.0266706	0.35147	0.613906	0.225991	0.0175308	0.397123	#N/A	#N/A	#N/A
Chr06_155000411_155043253		33.4872	5.06554	0.0369899	0.224293	yes	up	0	0	0	0.077152	0.0767383	0.0451983	0	0.0663628	#N/A	#N/A	#N/A
Chr06_155000411_155071136		21.8458	4.44928	0.026987	0.180345	yes	up	0	0	0	0.0942968	0.0426324	0	0	0.0456431	#N/A	#N/A	#N/A
Chr06_157262381_157268589	MSTRG.18617	69.8951	6.12712	0.000526935	0.0100112	yes	up	0	0	0	0.145731	0.0511588	0.198872	0	0.131921	0	0	XP_020949508.1
Chr06_157272705_157273018	MSTRG.18617	26.6003	4.73337	0.0166325	0.132528	yes	up	0	0	0	0.0600071	0.0511588	0.0451983	0	0.0521214	0	0	XP_020949508.1
Chr06_165164549_165167775	Pig.18415	0.0381015	-4.71401	0.000744503	0.0133306	yes	down	0.0136079	0.0259219	0.0400059	0	0	0	0.0265119	0	GAN-201	gigaxonin [Sus scrofa]	XP_003126888.2
Chr06_16875956_16911354	Pig.15137	7.68237	2.94155	0.000313052	0.00665026	yes	up	0.0204118	0	0.0666766	0.411477	0.358112	0.189833	0.0290295	0.319807	FGGY-202	FGGY carbohydrate kinase domain-containing protein isoform X5 [Sus scrofa]	XP_020953459.1
Chr06_169608196_169618090	Pig.15499	13.854	3.79223	4.94802e-07	3.23887e-05	yes	up	0.0204118	0	0.0133353	0.205739	0.238741	0.25311	0.011249	0.23253	MTHFSD-201	methenyltetrahydrofolate synthase domain-containing protein isoform X1 [Sus scrofa]	XP_020949357.1
Chr06_19602139_19625302	Pig.15148	12.2193	3.61108	0.0149449	0.123585	yes	up	0	0	0.0133353	0.0857244	0.0511588	0.0994362	0.0044451	0.0787732	PATJ-202	inaD-like protein isoform X5 [Sus scrofa]	XP_020952216.1
Chr06_20465710_20482544		2.71986	1.44353	0.0133022	0.112747	yes	up	0.0136079	0.0453634	0.0400059	0.137159	0.14495	0.153674	0.0329924	0.145261	#N/A	#N/A	#N/A
Chr06_27510977_27516672	Pig.05292	5.47008	2.45156	0.000341956	0.0071182	yes	up	0.0340197	0.012961	0.0266706	0.205739	0.238741	0.171753	0.0245504	0.205411	ANKRD13C-203	ankyrin repeat domain-containing protein 13C [Sus scrofa]	XP_003127975.1
Chr06_3676548_3758580	MSTRG.14981	4.95653	2.30933	0.019354	0.144471	yes	up	0.0204118	0.0194414	0	0.102869	0.170529	0.0632776	0.0132844	0.112225	0	0	XP_003128092.3
Chr06_3710003_3758580	MSTRG.14981	3.85394	1.94633	3.24112e-07	2.34786e-05	yes	up	0.108863	0.110168	0.11335	0.591498	1.05728	0.424864	0.110794	0.691215	0	0	XP_003128092.3
Chr06_3732683_3758580	MSTRG.14981	4.25778	2.0901	4.00282e-06	0.000189107	yes	up	0.0748433	0.0648048	0.0600089	0.402905	0.665065	0.298309	0.0665523	0.455426	0	0	XP_003128092.3
Chr06_40368775_40376408		0.027236	-5.19834	0.000106301	0.00285907	yes	down	0.0612354	0.0259219	0.0266706	0	0	0	0.0379426	0	#N/A	#N/A	#N/A
Chr06_40375921_40376408		0.0705197	-3.82583	0.0087821	0.0848988	yes	down	0.0204118	0	0.0266706	0	0	0	0.0156941	0	#N/A	#N/A	#N/A
Chr06_49238260_49238933	Pig.02789	0.259223	-1.94774	0.000248968	0.00570735	yes	down	0.265353	0.291622	0.34005	0.120014	0.162003	0.0994362	0.299008	0.127151	KIAA1328-202	protein hinderin isoform X5 [Sus scrofa]	XP_020951945.1
Chr06_49667205_49680000	Pig.02792	0.0456969	-4.45176	0.00282243	0.0371852	yes	down	0.0476275	0	0.0266706	0	0	0	0.0247661	0	FHOD3-206	FH1/FH2 domain-containing protein 3 isoform X2 [Sus scrofa]	XP_020951933.1
Chr06_54384938_54388312	Pig.03597	2.75497	1.46204	0.0249316	0.171677	yes	up	0.0340197	0.012961	0.0666766	0.308608	0.119371	0.0542379	0.0378857	0.160739	RNF138-202	PREDICTED: E3 ubiquitin-protein ligase RNF138 isoform X1 [Panthera pardus]	XP_004412977.1
Chr06_54767318_54799712	Pig.03600	0.199657	-2.3244	0.0244505	0.169655	yes	down	0.0748433	0.0777657	0.0600089	0	0.0426324	0.027119	0.0708726	0.0232504	B4GALT6-201	beta-1,4-galactosyltransferase 6 [Sus scrofa]	XP_003127934.2
Chr06_54767318_54808170	Pig.03600	0.0262262	-5.25285	0.00636042	0.0672299	yes	down	0.0136079	0.0194414	0.0933472	0	0	0	0.0421322	0	B4GALT6-201	beta-1,4-galactosyltransferase 6 [Sus scrofa]	XP_003127934.2
Chr06_59501294_59527059	Pig.03615	0.0695579	-3.84564	4.31589e-07	2.93103e-05	yes	down	0.163294	0.149051	0.146688	0.0342898	0	0.0180793	0.153011	0.0174564	TAF4B-201	transcription initiation factor TFIID subunit 4B [Sus scrofa]	XP_003127923.1
Chr06_59635446_59640281	Pig.03617	0.0650035	-3.94334	0.00194632	0.0275612	yes	down	0.0408236	0.0648048	0.0600089	0	0	0.0180793	0.0552124	0.00602644	SS18-203	PREDICTED: protein SSXT [Otolemur garnettii]	XP_004742918.1
Chr06_61490852_61503632	Pig.03624	6.60903	2.72444	0.00171846	0.0251655	yes	up	0.0340197	0	0.0466736	0.257173	0.247268	0.244071	0.0268978	0.249504	TTC39C-202	tetratricopeptide repeat protein 39C isoform X1 [Sus scrofa]	XP_003356432.3
Chr06_63426858_63485048	Pig.03641	0.211285	-2.24274	0.0161261	0.130183	yes	down	0.0612354	0.0842462	0.0533413	0	0.0341059	0.0361586	0.0662743	0.0234215	MIB1-201	PREDICTED: E3 ubiquitin-protein ligase MIB1 [Oryctolagus cuniculus]	XP_002713497.1
Chr06_63482109_63485048	Pig.03641	0.0435242	-4.52204	0.0486607	0.265702	yes	down	0.0612354	0	0.020003	0	0	0	0.0270795	0	MIB1-201	PREDICTED: E3 ubiquitin-protein ligase MIB1 [Oryctolagus cuniculus]	XP_002713497.1
Chr06_64203512_64203950	Pig.03650	0.464386	-1.1066	0.00988339	0.0925801	yes	down	0.204118	0.142571	0.213365	0.188594	0.162003	0.0632776	0.186685	0.137958	ROCK1-201	rho-associated protein kinase 1 [Sus scrofa]	XP_005653457.2
Chr06_70947328_70979808	MSTRG.15767,Pig.03683	0.0338474	-4.88481	0.00390414	0.0472409	yes	down	0.0272157	0.0194414	0.0466736	0	0	0	0.0311103	0	#N/A	#N/A	#N/A
Chr06_71718259_71725788	Pig.03686	6.15936	2.62278	0.00283789	0.0371852	yes	up	0.0340197	0	0.0133353	0.0942968	0.213162	0.117516	0.015785	0.141658	NDUFV2-202	NADH dehydrogenase [ubiquinone]	NP_001090944.2
Chr06_71718259_71727718	Pig.03686	2.06404	1.04547	5.99564e-05	0.00172351	yes	up	0.517099	0.207375	0.353386	1.02012	1.36424	1.01244	0.359287	1.13227	NDUFV2-202	NADH dehydrogenase [ubiquinone]	NP_001090944.2
Chr06_71718259_71734424	Pig.03686	3.39951	1.76533	0.00365264	0.0447964	yes	up	0	0.0259219	0.0466736	0.128587	0.0937912	0.162714	0.0241985	0.128364	NDUFV2-202	NADH dehydrogenase [ubiquinone]	NP_001090944.2
Chr06_71770746_71807159		45.4068	5.50484	0.00029636	0.00646637	yes	up	0	0	0	0.0514346	0.0682118	0.135595	0	0.0850804	#N/A	#N/A	#N/A
Chr06_71786235_71807159	Pig.03687	26.9252	4.75088	0.00537069	0.0596707	yes	up	0	0	0	0.0171449	0.0937912	0.0451983	0	0.0520448	ANKRD12-201	ankyrin repeat domain-containing protein 12 isoform X1 [Sus scrofa]	XP_020951722.1
Chr06_71800142_71818899	Pig.03687	0.300789	-1.73318	0.0243961	0.169655	yes	down	0.0884511	0.0453634	0.0533413	0.0171449	0.0341059	0.0361586	0.0623852	0.0291365	ANKRD12-201	ankyrin repeat domain-containing protein 12 isoform X1 [Sus scrofa]	XP_020951722.1
Chr06_75473544_75484018	Pig.02961	5.37712	2.42683	0.0370638	0.22449	yes	up	0.0340197	0	0	0.077152	0.127897	0.0632776	0.0113399	0.0894422	MACF1-201	PREDICTED: microtubule-actin cross-linking factor 1, isoforms 1/2/3/5 isoform X6 [Balaenoptera acutorostrata scammoni]	XP_029086933.1
Chr06_770215_796587		8.97602	3.16608	0.00872525	0.0846505	yes	up	0.0272157	0	0	0.102869	0.14495	0.108476	0.00907191	0.118765	#N/A	#N/A	#N/A
Chr06_785554_796587	Pig.18898	3.7622	1.91158	0.0145714	0.121794	yes	up	0.0272157	0.0259219	0.0133353	0.162876	0.0767383	0.162714	0.0221577	0.134109	Ccdc30	coiled-coil domain-containing protein 30 [Sus scrofa]	XP_020952582.1
Chr06_79123676_79127999	Pig.03010	0.11274	-3.14892	0.0192348	0.144132	yes	down	0.0544315	0	0.0533413	0.0171449	0	0	0.0359242	0.00571496	ZMYM4-201	zinc finger MYM-type protein 4 isoform X2 [Sus scrofa]	XP_020951559.1
Chr06_79153469_79156262	Pig.03010	4.28157	2.09814	0.00913544	0.0870751	yes	up	0.0272157	0.012961	0	0.145731	0.0852647	0.0451983	0.0133922	0.0920648	ZMYM4-201	zinc finger MYM-type protein 4 isoform X2 [Sus scrofa]	XP_020951559.1
Chr06_81552679_81556789		0.493113	-1.02001	0.0206387	0.150712	yes	down	0.210922	0.13609	0.220033	0.162876	0.196109	0.0813569	0.189015	0.146781	#N/A	#N/A	#N/A
Chr06_82248210_82248917		0.0804458	-3.63584	0.00576102	0.0624411	yes	down	0.0680393	0.012961	0.0666766	0	0.0170529	0	0.0492256	0.00568432	#N/A	#N/A	#N/A
Chr06_82809042_82819570	Pig.03074	14.8326	3.8907	0.0191198	0.143676	yes	up	0	0	0	0.0342898	0.0255794	0.027119	0	0.028996	SNRNP40-202	PREDICTED: U5 small nuclear ribonucleoprotein 40 kDa protein [Equus caballus]	XP_003356314.1
Chr06_83054379_83055628	Pig.03076	19.6733	4.29817	0.00833803	0.0828163	yes	up	0	0	0	0.0342898	0.0852647	0	0	0.0398515	PUM1-201	pumilio homolog 1 isoform X17 [Sus scrofa]	XP_020951410.1
Chr06_85166563_85180346	Pig.03097	21.8578	4.45008	0.0115413	0.102879	yes	up	0	0	0	0.0428622	0.0596853	0.027119	0	0.0432222	PHACTR4-201	LOW QUALITY PROTEIN: phosphatase and actin regulator 4 [Sus scrofa]	XP_020951327.1
Chr06_9307653_9324795	Pig.14732	3.86519	1.95054	0.0185735	0.141528	yes	up	0.0340197	0	0.020003	0.0942968	0.170529	0.0451983	0.0180075	0.103342	OSBPL9-202	oxysterol-binding protein-related protein 9 isoform X1 [Sus scrofa]	XP_005665492.2
Chr06_96048045_96062663	Pig.08606	11.1934	3.48458	1.13448e-05	0.000446641	yes	up	0	0.0194414	0.020003	0.240028	0.349585	0.135595	0.0131481	0.241736	DDI1-201	PREDICTED: protein DDI1 homolog 2 isoform X2 [Orcinus orca]	XP_012389449.1
Chr06_96055937_96062663	Pig.08606	16.5741	4.05086	0.0108496	0.0983443	yes	up	0	0	0	0.0257173	0.0341059	0.0361586	0	0.0319939	DDI1-201	PREDICTED: protein DDI1 homolog 2 isoform X2 [Orcinus orca]	XP_012389449.1
Chr06_97714092_97742948		5.09989	2.35047	0.0392345	0.233218	yes	up	0.0136079	0	0.0133353	0.0685795	0.0682118	0.0632776	0.00898106	0.0666896	#N/A	#N/A	#N/A
Chr06_9953190_9955184	Pig.14721	0.0415628	-4.58856	0.0160555	0.129806	yes	down	0.0204118	0	0.0666766	0	0	0	0.0290295	0	TUT4-202	terminal uridylyltransferase 4 isoform X4 [Sus scrofa]	XP_020952296.1
Chr07_102162754_102172864	MSTRG.21103,Pig.08859	0.0952395	-3.3923	0.0107916	0.0982091	yes	down	0.0204118	0.0453634	0.0400059	0.0171449	0	0	0.0352604	0.00571496	#N/A	#N/A	#N/A
Chr07_104353059_104373328		157.729	7.30131	4.30477e-08	4.41888e-06	yes	up	0	0	0	0.291463	0.392218	0.244071	0	0.30925	#N/A	#N/A	#N/A
Chr07_108009948_108018158	Pig.09252	10.0385	3.32747	0.0446474	0.2548	yes	up	0	0	0.0133353	0.0342898	0.0426324	0.108476	0.0044451	0.0617993	MMUT-201	PREDICTED: methylmalonyl-CoA mutase, mitochondrial [Ovis aries]	XP_004018923.1
Chr07_10942910_10945427	MSTRG.19250	27.6553	4.78949	0.0389699	0.232253	yes	up	0	0	0	0.0600071	0.110844	0	0	0.0569504	0	0	XP_001927944.1
Chr07_10942910_10950805	Pig.13812,MSTRG.19250	34.5667	5.11131	0.00186942	0.0271565	yes	up	0	0	0	0.0857244	0.0852647	0.0361586	0	0.0690493	#N/A	#N/A	#N/A
Chr07_121154190_121180103	Pig.17302	37.5495	5.23072	0.000377075	0.00773076	yes	up	0	0	0	0.0428622	0.102318	0.0723172	0	0.072499	ILRUN-201	uncharacterized protein C6orf106 homolog isoform 2 [Mus musculus]	NP_001038184.1
Chr07_121172550_121180103	Pig.17302	43.2989	5.43626	7.52226e-05	0.00210662	yes	up	0	0	0	0.120014	0.0937912	0.0451983	0	0.0863346	ILRUN-201	uncharacterized protein C6orf106 homolog isoform 2 [Mus musculus]	NP_001038184.1
Chr07_123110937_123127062		0.023899	-5.38691	0.00100397	0.0168951	yes	down	0.0884511	0.0194414	0.0266706	0	0	0	0.0448544	0	#N/A	#N/A	#N/A
Chr07_127317226_127327861	Pig.11473	0.00324382	-8.26809	2.13526e-06	0.00011263	yes	down	0.387824	0.226817	0.333383	0	0	0	0.316008	0	Tnxb	tenascin-X isoform X5 [Sus scrofa]	XP_020953995.1
Chr07_127317226_127328596	Pig.11473	0.00759676	-7.0404	9.69602e-08	8.63582e-06	yes	down	0.394628	0.40827	0.600089	0	0.0170529	0	0.467662	0.00568432	Tnxb	tenascin-X isoform X5 [Sus scrofa]	XP_020953995.1
Chr07_128486884_128504793		0.0276007	-5.17915	1.52953e-05	0.000557713	yes	down	0.129275	0.103688	0.180027	0	0	0.0180793	0.137663	0.00602644	#N/A	#N/A	#N/A
Chr07_128977037_128977961	Pig.11378	0.0400281	-4.64284	0.0186241	0.141604	yes	down	0.0136079	0.0259219	0.0333383	0	0	0	0.0242894	0	GABBR1-201	PREDICTED: gamma-aminobutyric acid type B receptor subunit 1 isoform X3 [Rhinopithecus bieti]	XP_020953567.1
Chr07_133132933_133218836		0.0119254	-6.38982	0.00389629	0.0472409	yes	down	0	0.12961	0.0800119	0	0	0	0.0698738	0	#N/A	#N/A	#N/A
Chr07_20514721_20548703		6.30334	2.65612	0.0162381	0.130505	yes	up	0	0	0.0266706	0.137159	0.0682118	0.0451983	0.00889021	0.083523	#N/A	#N/A	#N/A
Chr07_20538732_20548703		3.23741	1.69484	3.13573e-05	0.000996281	yes	up	0.0748433	0.103688	0.0800119	0.488629	0.562747	0.325428	0.0861809	0.458935	#N/A	#N/A	#N/A
Chr07_23414882_23455147		0.0183563	-5.76758	0.0039903	0.0478572	yes	down	0.19051	0	0	0	0	0	0.0635034	0	#N/A	#N/A	#N/A
Chr07_23444137_23455147	Pig.19585	0.0136216	-6.19796	2.38565e-11	5.20933e-09	yes	down	0.306177	0.2657	0.666766	0.0257173	0	0	0.412881	0.00857244	TUBB2B-205	Tubulin beta-2A chain [Fukomys damarensis]	XP_025838410.1
Chr07_26236572_26239346	Pig.19725	0.308283	-1.69767	0.0156557	0.127319	yes	down	0.0748433	0.0518438	0.0866795	0.0600071	0.0255794	0.0180793	0.0711222	0.0345553	GTF2B-201	transcription factor IIIB 90 kDa subunit isoform X2 [Sus scrofa]	XP_020937274.1
Chr07_27239271_27258403	Pig.18239	0.11629	-3.1042	0.00122646	0.0192189	yes	down	0.102059	0.0453634	0.0466736	0	0.0170529	0.0180793	0.0646987	0.0117108	KLC4-201	kinesin light chain 1 isoform X3 [Sus scrofa]	XP_020937194.1
Chr07_29778850_29779243		0.148203	-2.75435	0.0405554	0.238461	yes	down	0.0272157	0.0453634	0.0400059	0	0	0.027119	0.0375283	0.00903966	#N/A	#N/A	#N/A
Chr07_35015014_35023525	Pig.20280	0.0705773	-3.82465	0.0454112	0.256731	yes	down	0	0.0194414	0.020003	0	0	0	0.0131481	0	DICER1-203	endoribonuclease Dicer isoform X1 [Sus scrofa]	XP_020953825.1
Chr07_35410729_35446616	MSTRG.19801	4.12944e+10	35.2652	8.57417e-07	5.2341e-05	yes	up	0	0	0	0	6.64212	26.7303	0	11.1241	0	0	XP_001928879.1
Chr07_35415757_35450947	MSTRG.19801	5.54631e+09	32.3689	1.08058e-11	2.55253e-09	yes	up	0	0	0	0.0857244	0.682118	5.83962	0	2.20249	0	0	XP_001928879.1
Chr07_35429135_35449112	MSTRG.19801	262.851	8.0381	0.0117609	0.103581	yes	up	0.0136079	0.012961	0.0133353	1.95452	6.02822	8.40688	0.0133014	5.4632	0	0	XP_001928879.1
Chr07_35448459_35546999		1402.08	10.4534	1.01826e-21	2.7661e-18	yes	up	0.0136079	0	0.0133353	12.13	21.8278	20.0771	0.00898106	18.0116	#N/A	#N/A	#N/A
Chr07_35477234_35532048		1480.37	10.5317	3.54529e-06	0.000173528	yes	up	0	0	0	0	1.68824	6.11985	0	2.6027	#N/A	#N/A	#N/A
Chr07_36723571_36725562		0.0760632	-3.71666	4.66836e-14	1.95102e-11	yes	down	0.306177	0.246258	0.480071	0.0428622	0.0341059	0.0451983	0.344169	0.0407221	#N/A	#N/A	#N/A
Chr07_4174021_4175523		47.8047	5.57908	0.000264606	0.00598977	yes	up	0	0	0	0.102869	0.127897	0.0542379	0	0.0950014	#N/A	#N/A	#N/A
Chr07_4216731_4224186	Pig.15418	76.2374	6.25243	0.00013617	0.00346487	yes	up	0	0	0	0.231456	0.179056	0.0542379	0	0.154917	SLC17A3-202	sodium-dependent phosphate transport protein 4 isoform X1 [Sus scrofa]	XP_020954076.1
Chr07_4267797_4268205	Pig.15419	561.002	9.13186	2.23705e-13	7.59617e-11	yes	up	0	0	0	1.01155	1.39834	0.885886	0	1.09859	SLC17A1-202	sodium-dependent phosphate transport protein 1 isoform X1 [Sus scrofa]	XP_020953970.1
Chr07_4302776_4309255	Pig.15420	35.7989	5.16184	0.00301738	0.039032	yes	up	0	0	0	0.0942968	0.0426324	0.0723172	0	0.0697488	SLC17A4-205	probable small intestine urate exporter isoform X3 [Sus scrofa]	XP_020954070.1
Chr07_54046395_54049908	Pig.19270	5.74798	2.52305	0.0270205	0.180347	yes	up	0.0136079	0	0.0133353	0.0600071	0.102318	0.0632776	0.00898106	0.0752008	AREL1-201	apoptosis-resistant E3 ubiquitin protein ligase 1 isoform X1 [Sus scrofa]	XP_003356794.1
Chr07_57467134_57478320	Pig.04346	23.5134	4.55541	0.01761	0.137043	yes	up	0	0	0	0.0514346	0.0511588	0.0361586	0	0.0462507	PCNX1-201	pecanex-like protein 1 isoform X1 [Sus scrofa]	XP_020955078.1
Chr07_59218822_59235084	Pig.04323	8.09981	3.01789	0.0277815	0.183398	yes	up	0.0204118	0	0	0.102869	0.0682118	0.0723172	0.00680393	0.0811328	DCAF5-201	DDB1- and CUL4-associated factor 5 isoform X1 [Sus scrofa]	XP_020955057.1
Chr07_59218822_59249764	Pig.04323	15.1876	3.92482	0.0483388	0.265277	yes	up	0	0	0	0.0514346	0.0426324	0	0	0.0313557	DCAF5-201	DDB1- and CUL4-associated factor 5 isoform X1 [Sus scrofa]	XP_020955057.1
Chr07_61242972_61296019	Pig.04303	2.09846	1.06933	0.00246069	0.0330097	yes	up	0.122471	0.0972072	0.0933472	0.342898	0.2899	0.397745	0.104342	0.343514	GPHN-207	gephyrin isoform X1 [Sus scrofa]	XP_020953661.1
Chr07_84134001_84147684	Pig.09696	0.0831695	-3.5878	0.0117265	0.103581	yes	down	0.0544315	0.0259219	0.0666766	0	0	0.0180793	0.04901	0.00602644	PRKD1-201	serine/threonine-protein kinase D1 isoform X2 [Sus scrofa]	XP_020954845.1
Chr07_89693469_89694186	Pig.08443	0.176192	-2.50478	0.00465043	0.0539451	yes	down	0.0476275	0.0583243	0.0733442	0.0171449	0.0341059	0	0.0597654	0.0170836	RALGAPA1-201	ral GTPase-activating protein subunit alpha-1 isoform X7 [Sus scrofa]	XP_020954818.1
Chr07_91237131_91288827		25.0656	4.64764	0.00633885	0.0671326	yes	up	0	0	0	0.0342898	0.0767383	0.0361586	0	0.0490622	#N/A	#N/A	#N/A
Chr07_93364322_93374732	Pig.08467	22.9448	4.5201	0.00513096	0.0575961	yes	up	0	0	0	0.0514346	0.0682118	0.0180793	0	0.0459086	ADPGK-201	ADP-dependent glucokinase isoform X1 [Sus scrofa]	XP_020954758.1
Chr07_95086666_95087001	MSTRG.20849,Pig.17563	3.43224	1.77915	0.0150548	0.124057	yes	up	0.0204118	0	0.0266706	0.077152	0.110844	0.0542379	0.0156941	0.0807447	#N/A	#N/A	#N/A
Chr07_95830899_95842021	Pig.17585	0.174675	-2.51726	0.0115197	0.102879	yes	down	0.0544315	0.0324024	0.11335	0.0342898	0	0.0180793	0.066728	0.0174564	PTPN9-201	tyrosine-protein phosphatase non-receptor type 9 isoform X1 [Sus scrofa]	XP_003128529.1
Chr07_95837296_95842021	Pig.17585	0.330116	-1.59896	0.0186458	0.141604	yes	down	0.0748433	0.0648048	0.0800119	0.0514346	0	0.0632776	0.07322	0.0382374	PTPN9-201	tyrosine-protein phosphatase non-receptor type 9 isoform X1 [Sus scrofa]	XP_003128529.1
Chr07_96610272_96633342		0.0305177	-5.03421	0.0423889	0.246046	yes	down	0.0340197	0.0259219	0.0400059	0	0	0	0.0333158	0	#N/A	#N/A	#N/A
Chr07_97375124_97377963	Pig.08771	3.22569	1.68961	0.00485753	0.0554525	yes	up	0.0476275	0.0259219	0.0666766	0.282891	0.281374	0.135595	0.046742	0.233286	ETFA-201	electron transfer flavoprotein subunit alpha, mitochondrial [Sus scrofa]	NP_001231332.1
Chr07_97375124_97392874	Pig.08771	3.96092	1.98584	0.0094265	0.0895353	yes	up	0	0.0453634	0.0400059	0.197166	0.281374	0.108476	0.0284564	0.195672	ETFA-201	electron transfer flavoprotein subunit alpha, mitochondrial [Sus scrofa]	NP_001231332.1
Chr08_115366834_115376634	Pig.00663	39.9828	5.32131	0.000614436	0.0113933	yes	up	0	0	0	0.120014	0.0852647	0.0361586	0	0.0804792	ETNPPL-201	ethanolamine-phosphate phospho-lyase isoform X1 [Sus scrofa]	XP_020957345.1
Chr08_115373299_115376634	Pig.00663	124.874	6.96433	3.94322e-07	2.71184e-05	yes	up	0	0	0	0.257173	0.247268	0.225991	0	0.243477	ETNPPL-201	ethanolamine-phosphate phospho-lyase isoform X1 [Sus scrofa]	XP_020957345.1
Chr08_115962710_115977373	Pig.00658	2.17688	1.12226	0.0371138	0.224543	yes	up	0.0612354	0.0583243	0.100015	0.248601	0.272847	0.225991	0.0731915	0.249146	HADH-202	hydroxyacyl-coenzyme A dehydrogenase, mitochondrial precursor [Sus scrofa]	NP_999496.1
Chr08_117809709_117824540	Pig.00649	7.0974	2.82729	0.0244286	0.169655	yes	up	0	0.0259219	0	0.0685795	0.2899	0.0180793	0.00864064	0.12552	NPNT-201	nephronectin isoform X1 [Sus scrofa]	XP_020957362.1
Chr08_118267845_118291983	Pig.00645	22.6825	4.50351	0.0127291	0.109426	yes	up	0	0	0	0.0171449	0.0682118	0.0451983	0	0.0435183	PPA2-206	inorganic pyrophosphatase 2, mitochondrial isoform X1 [Sus scrofa]	XP_020957372.1
Chr08_118273370_118291983	Pig.00645	8.66135	3.11459	1.55308e-07	1.27244e-05	yes	up	0.0884511	0.0453634	0.0400059	0.745802	1.27044	0.406784	0.0579401	0.807677	PPA2-206	inorganic pyrophosphatase 2, mitochondrial isoform X1 [Sus scrofa]	XP_020957372.1
Chr08_121697598_121713972	Pig.00629	0.0734191	-3.7677	0.0307268	0.19803	yes	down	0.0272157	0.012961	0	0	0	0	0.0133922	0	PPP3CA-201	serine/threonine-protein phosphatase 2B catalytic subunit alpha isoform isoform X3 [Sus scrofa]	XP_020956130.1
Chr08_133537058_133555553	Pig.00571	29.3595	4.87575	0.0061992	0.0661695	yes	up	0	0	0	0.0428622	0	0.117516	0	0.0534592	TRPM2-201	ADP-ribose pyrophosphatase, mitochondrial isoform X1 [Sus scrofa]	XP_003357134.1
Chr08_133538651_133555553	Pig.00571	15.3197	3.93731	0.0456026	0.256795	yes	up	0	0	0	0.0342898	0.0596853	0	0	0.031325	TRPM2-201	ADP-ribose pyrophosphatase, mitochondrial isoform X1 [Sus scrofa]	XP_003357134.1
Chr08_133546769_133555553	Pig.00571	12.4615	3.6394	0.0167	0.13272	yes	up	0	0.012961	0	0.0685795	0.0682118	0.153674	0.00432032	0.0968218	TRPM2-201	ADP-ribose pyrophosphatase, mitochondrial isoform X1 [Sus scrofa]	XP_003357134.1
Chr08_133608977_133616275	Pig.00570	26.437	4.72449	0.00204977	0.0286282	yes	up	0	0	0	0.0428622	0.0767383	0.0361586	0	0.0519197	HSD17B11-201	estradiol 17-beta-dehydrogenase 11 [Sus scrofa]	XP_020957431.1
Chr08_134151856_134156872	Pig.00564	0.0230135	-5.44137	0.0208838	0.152093	yes	down	0.0340197	0.0518438	0.0333383	0	0	0	0.0397339	0	PTPN13-201	LOW QUALITY PROTEIN: tyrosine-protein phosphatase non-receptor type 13 [Sus scrofa]	XP_013834505.2
Chr08_134205463_134227525		0.0253969	-5.2992	0.00776704	0.0780006	yes	down	0.0340197	0.0324024	0.0533413	0	0	0	0.0399211	0	#N/A	#N/A	#N/A
Chr08_138698753_138701503	Pig.00533	10.3099	3.36596	0.0261247	0.176756	yes	up	0.0136079	0	0	0.102869	0.0341059	0.0723172	0.00453596	0.0697641	RASGEF1B-201	ras-GEF domain-containing family member 1B isoform X2 [Sus scrofa]	XP_020955964.1
Chr08_139877592_139902897	Pig.00525	2.28738	1.1937	0.0313342	0.200517	yes	up	0.0408236	0.0777657	0.0933472	0.274318	0.238741	0.27119	0.0706455	0.261416	ANTXR2-205	anthrax toxin receptor 2 [Sus scrofa]	XP_003129419.3
Chr08_15198920_15200822	MSTRG.22096,Pig.04165	36.1444	5.1757	0.000711399	0.0128406	yes	up	0	0	0	0.111442	0.0596853	0.0451983	0	0.0721084	#N/A	#N/A	#N/A
Chr08_15357160_15363180	Pig.04163	0.328081	-1.60787	0.0259348	0.17613	yes	down	0.0884511	0.0518438	0.0533413	0.0685795	0.0341059	0	0.0645454	0.0342285	GUCY1B1-201	PREDICTED: guanylate cyclase soluble subunit beta-1 [Bubalus bubalis]	XP_004421004.1
Chr08_16180452_16186784		9.70023	3.27802	0.000462316	0.00903511	yes	up	0.0476275	0.012961	0	0.214311	0.511588	0.198872	0.0201962	0.308257	#N/A	#N/A	#N/A
Chr08_1703929_1711045	Pig.20462	0.381251	-1.39119	0.044254	0.25362	yes	down	0.136079	0.0388829	0.186694	0.0600071	0.14495	0	0.120552	0.068319	TBC1D14	LOW QUALITY PROTEIN: TBC1 domain family member 14 [Sus scrofa]	XP_020956625.1
Chr08_1819603_1844417		24.9134	4.63885	0.0108608	0.0983443	yes	up	0	0	0	0.0685795	0.0852647	0	0	0.0512814	#N/A	#N/A	#N/A
Chr08_20846343_20878523	Pig.16697	4.23088	2.08096	3.07823e-09	4.91883e-07	yes	up	0.15649	0.110168	0.2267	1.21729	1.24487	0.78645	0.164453	1.08287	DCUN1D4-201	PREDICTED: DCN1-like protein 4 isoform X3 [Ceratotherium simum simum]	XP_004419114.1
Chr08_20859963_20878523	Pig.16697	12.1416	3.60188	5.27628e-05	0.00154118	yes	up	0	0	0.0266706	0.137159	0.162003	0.180793	0.00889021	0.159985	DCUN1D4-201	PREDICTED: DCN1-like protein 4 isoform X3 [Ceratotherium simum simum]	XP_004419114.1
Chr08_21865399_21874840	Pig.16689	21.2113	4.40676	0.0451693	0.256072	yes	up	0	0	0	0.077152	0.0341059	0.0180793	0	0.0431124	TEC-201	tyrosine-protein kinase Tec isoform X1 [Sus scrofa]	XP_020956831.1
Chr08_22375486_22380572	Pig.16683	57.7089	5.85072	0.0367037	0.223305	yes	up	0	0	0	0.171449	0.0596853	0.108476	0	0.113203	CORIN-201	atrial natriuretic peptide-converting enzyme isoform X1 [Sus scrofa]	XP_020956233.1
Chr08_22499250_22503449	Pig.16682	0.259565	-1.94583	0.0402503	0.23718	yes	down	0.0476275	0.0324024	0.0800119	0	0.0255794	0.0361586	0.0533473	0.0205793	ATP10D-201	probable phospholipid-transporting ATPase VD isoform X1 [Sus scrofa]	XP_020956224.1
Chr08_41107578_41125290	Pig.19832	2.96097	1.56607	0.000402596	0.00816157	yes	up	0.102059	0.0453634	0.0666766	0.360043	0.400744	0.225991	0.0713663	0.328926	CCDC149-201	coiled-coil domain-containing protein 149 isoform X3 [Sus scrofa]	XP_020956219.1
Chr08_43322535_43338514	Pig.05313	19.1481	4.25913	0.035438	0.217799	yes	up	0	0	0	0.0257173	0.0596853	0.027119	0	0.0375072	ADGRA3-201	adhesion G protein-coupled receptor A3 isoform X1 [Sus scrofa]	XP_020956719.1
Chr08_43322535_43360726	Pig.05313	2.59211	1.37413	0.040005	0.236247	yes	up	0.0476275	0.012961	0.0333383	0.137159	0.102318	0.126555	0.0313089	0.122011	ADGRA3-201	adhesion G protein-coupled receptor A3 isoform X1 [Sus scrofa]	XP_020956719.1
Chr08_49633206_49660217	Pig.05336	4.48669	2.16565	0.000179194	0.00440525	yes	up	0.0476275	0.0259219	0.0400059	0.214311	0.31548	0.25311	0.0378518	0.260967	CPEB2-201	cytoplasmic polyadenylation element-binding protein 2 isoform X1 [Sus scrofa]	XP_020955979.1
Chr08_56193008_56211049	MSTRG.22535	0.080884	-3.628	0.00724733	0.0745734	yes	down	0.0408236	0.0324024	0.0733442	0	0	0.0180793	0.0488567	0.00602644	0	0	XP_020956977.1
Chr08_56552112_56567910		0.0481503	-4.37631	0.0472953	0.261523	yes	down	0.0408236	0	0.0333383	0	0	0	0.0247206	0	#N/A	#N/A	#N/A
Chr08_56655509_56656337	Pig.19162	0.326173	-1.61629	0.0251794	0.172292	yes	down	0.115667	0.0583243	0.0666766	0.0257173	0.0511588	0.0451983	0.0802226	0.0406915	CEP135-201	centrosomal protein of 135 kDa isoform X1 [Sus scrofa]	XP_020957009.1
Chr08_70741883_70743519	Pig.08320	0.23455	-2.09203	0.00485834	0.0554525	yes	down	0.0748433	0.0842462	0.0666766	0	0.0596853	0.027119	0.0752554	0.0289348	ANKRD17-201	ankyrin repeat domain-containing protein 17 isoform X1 [Sus scrofa]	XP_020956038.1
Chr08_71012313_71017161	MSTRG.22686,Pig.08321	126.703	6.9853	2.65669e-08	2.94567e-06	yes	up	0	0	0	0.308608	0.230215	0.207912	0	0.248912	#N/A	#N/A	#N/A
Chr08_71012313_71018900	MSTRG.22686,Pig.08321	54.5747	5.77016	3.11983e-05	0.000996281	yes	up	0	0	0	0.0857244	0.153477	0.0813569	0	0.106853	#N/A	#N/A	#N/A
Chr08_71012313_71020074	MSTRG.22686,Pig.08321	155.239	7.27835	1.00249e-08	1.29128e-06	yes	up	0	0	0	0.360043	0.332532	0.225991	0	0.306189	#N/A	#N/A	#N/A
Chr08_71021523_71023766	MSTRG.22686	146.115	7.19097	1.21157e-08	1.47764e-06	yes	up	0	0	0	0.368615	0.2899	0.207912	0	0.288809	0	0	NP_001005208.1
Chr08_71078825_71082407	Pig.08323	21.8537	4.44981	0.0174872	0.137043	yes	up	0	0	0	0.0257173	0.0341059	0.0632776	0	0.0410336	AFM-203	afamin isoform X1 [Sus scrofa]	XP_003357020.1
Chr08_71078825_71090128		86.5547	6.43554	1.67431e-05	0.000598455	yes	up	0	0	0	0.120014	0.187582	0.189833	0	0.16581	#N/A	#N/A	#N/A
Chr08_71080336_71084796	Pig.08323	216.38	7.75742	2.86356e-10	5.98373e-08	yes	up	0	0	0	0.497202	0.43485	0.343507	0	0.425186	AFM-203	afamin isoform X1 [Sus scrofa]	XP_003357020.1
Chr08_71418686_71512101		9.66804	3.27322	3.66155e-05	0.00113675	yes	up	0.0884511	0	0.0400059	0.977258	0.298427	0.497181	0.042819	0.590955	#N/A	#N/A	#N/A
Chr08_71559017_71589737	Pig.08332	43.6501	5.44791	0.00028853	0.00636989	yes	up	0	0	0	0.0942968	0.110844	0.0542379	0	0.0864596	MTHFD2-201	PREDICTED: probable bifunctional methylenetetrahydrofolate dehydrogenase/cyclohydrolase 2 [Bos mutus]	XP_005891322.1
Chr08_71559017_71632364	Pig.08332	33.2294	5.05439	0.000240723	0.00554173	yes	up	0	0	0	0.0342898	0.0852647	0.0723172	0	0.0639572	MTHFD2-201	PREDICTED: probable bifunctional methylenetetrahydrofolate dehydrogenase/cyclohydrolase 2 [Bos mutus]	XP_005891322.1
Chr08_74627540_74632046	Pig.08363	3.15667	1.6584	0.00367192	0.0449314	yes	up	0.0476275	0.0194414	0.0333383	0.128587	0.221688	0.135595	0.0334691	0.161957	CNOT6L-204	CCR4-NOT transcription complex subunit 6-like isoform X1 [Sus scrofa]	XP_020956265.1
Chr08_84142040_84143093	Pig.01079	0.0362935	-4.78415	0.0292793	0.190966	yes	down	0.0204118	0.0194414	0.0466736	0	0	0	0.0288423	0	ZNF827-201	zinc finger protein 827 isoform X1 [Sus scrofa]	XP_020957194.1
Chr08_87802538_87815783	Pig.01059	0.0122753	-6.3481	2.93089e-05	0.000942219	yes	down	0.0816472	0.0777657	0.0800119	0	0	0	0.0798083	0	RNF150-202	LOW QUALITY PROTEIN: RING finger protein 150 [Sus scrofa]	XP_020957213.1
Chr08_88702038_88703585	Pig.01052	0.0219925	-5.50684	0.00860672	0.0841013	yes	down	0.0476275	0.0518438	0.0266706	0	0	0	0.0420473	0	MAML3-201	LOW QUALITY PROTEIN: mastermind-like protein 3 [Sus scrofa]	XP_020956336.1
Chr08_89359872_89392735		10.4454	3.3848	0.000518075	0.00994594	yes	up	0	0	0.020003	0.102869	0.0937912	0.117516	0.00666766	0.104725	#N/A	#N/A	#N/A
Chr08_98242246_98249632		21.4468	4.42269	0.0489892	0.266823	yes	up	0	0	0	0.137159	0	0	0	0.0457197	#N/A	#N/A	#N/A
Chr08_98373397_98395063	Pig.01030	28.2689	4.82114	0.00214267	0.029546	yes	up	0	0	0	0.0257173	0.0937912	0.0451983	0	0.0549023	LARP1B-201	la-related protein 1B isoform X1 [Sus scrofa]	XP_013834346.2
Chr08_98411085_98446659	Pig.01030	24.9216	4.63933	0.0192601	0.144132	yes	up	0	0	0	0.0600071	0.0937912	0	0	0.0512661	LARP1B-201	la-related protein 1B isoform X1 [Sus scrofa]	XP_013834346.2
Chr08_98428798_98446659	Pig.01030	99.4186	6.63544	2.13467e-06	0.00011263	yes	up	0	0	0	0.145731	0.272847	0.162714	0	0.193764	LARP1B-201	la-related protein 1B isoform X1 [Sus scrofa]	XP_013834346.2
Chr08_98434223_98446659	Pig.01030	25.5266	4.67393	0.015701	0.127319	yes	up	0	0	0	0.0171449	0.0852647	0.0451983	0	0.0492026	LARP1B-201	la-related protein 1B isoform X1 [Sus scrofa]	XP_013834346.2
Chr09_10030986_10046260		30.5948	4.93521	1.02476e-11	2.55253e-09	yes	up	0.0204118	0.0648048	0	1.6802	1.5774	1.5729	0.0284055	1.61017	#N/A	#N/A	#N/A
Chr09_102928871_102935963	Pig.08203	2.5521	1.35168	0.0446308	0.2548	yes	up	0.0136079	0.0388829	0.0933472	0.162876	0.221688	0.189833	0.0486126	0.191466	DDX10	probable ATP-dependent RNA helicase DDX10 [Sus scrofa]	XP_020918412.1
Chr09_105808546_105819962	Pig.08232	32.1592	5.00716	0.000557502	0.0105537	yes	up	0	0	0	0.0342898	0.0682118	0.0813569	0	0.0612861	BCO2-203	beta,beta-carotene 9',10'-oxygenase isoform X1 [Sus scrofa]	XP_003129903.2
Chr09_110087896_110158133	Pig.11675	0.261357	-1.93591	0.0273801	0.181631	yes	down	0.0544315	0.0972072	0.140021	0.0428622	0.0255794	0.0542379	0.0972198	0.0408932	TMEM135-201	transmembrane protein 135 isoform X1 [Sus scrofa]	XP_020918270.1
Chr09_116505101_116511736	MSTRG.25472,Pig.08139	0.0935693	-3.41782	0.000317716	0.00670086	yes	down	0.0952551	0.123129	0.0400059	0	0.0426324	0	0.08613	0.0142108	#N/A	#N/A	#N/A
Chr09_116510800_116511736	MSTRG.25472,Pig.08139	0.0393345	-4.66806	0.00209016	0.0291175	yes	down	0.0476275	0	0.0400059	0	0	0	0.0292112	0	#N/A	#N/A	#N/A
Chr09_116529537_116538460	MSTRG.25472	0.00836111	-6.90209	2.64161e-07	1.93944e-05	yes	down	0.102059	0.0972072	0.166691	0	0	0	0.121986	0	0	0	XP_005667294.2
Chr09_117715212_117716726	Pig.08150	0.149909	-2.73784	5.99418e-08	5.7134e-06	yes	down	0.312981	0.155531	0.20003	0.0428622	0.0682118	0.0451983	0.222847	0.0520908	MAML2-201	mastermind-like protein 2 isoform X2 [Sus scrofa]	XP_020957993.1
Chr09_125072334_125077449	Pig.12884	2.41532	1.27221	0.0029265	0.0382204	yes	up	0.0544315	0.0453634	0.153356	0.308608	0.366638	0.25311	0.0843836	0.309452	FCHSD2-201	F-BAR and double SH3 domains protein 2 isoform X7 [Sus scrofa]	XP_020957951.1
Chr09_125072334_125098793	Pig.12884	2.41018	1.26914	0.0445158	0.254584	yes	up	0.0340197	0.0194414	0.126685	0.214311	0.2899	0.135595	0.0600489	0.213269	FCHSD2-201	F-BAR and double SH3 domains protein 2 isoform X7 [Sus scrofa]	XP_020957951.1
Chr09_125742234_125752925	Pig.12876	6.2183	2.63652	0.0482027	0.264798	yes	up	0	0	0.0133353	0.0428622	0.0852647	0	0.0044451	0.042709	RAB6A-201	PREDICTED: ras-related protein Rab-6A isoform X1 [Oryctolagus cuniculus]	XP_002708751.1
Chr09_126099784_126107936	Pig.12869	0.0839946	-3.57356	0.041873	0.244357	yes	down	0.0272157	0	0.0133353	0	0	0	0.013517	0	C2CD3-202	LOW QUALITY PROTEIN: C2 domain-containing protein 3 [Sus scrofa]	XP_020918146.1
Chr09_126300276_126301004	Pig.12867	0.0574122	-4.1225	0.0163635	0.131319	yes	down	0.0272157	0.012961	0.0133353	0	0	0	0.0178373	0	P4HA3-201	prolyl 4-hydroxylase subunit alpha-3 isoform X2 [Sus scrofa]	XP_020918148.1
Chr09_129838326_129855475	Pig.17461	15.4795	3.95229	0.0110205	0.09913	yes	up	0	0	0	0.0428622	0.0511588	0	0	0.0313403	PPFIBP2-203	liprin-beta-2 isoform X8 [Sus scrofa]	XP_020917946.1
Chr09_132854062_132873591	Pig.10255	2.93649	1.55409	0.00510195	0.0574474	yes	up	0.0544315	0.0324024	0.0266706	0.145731	0.213162	0.162714	0.0378348	0.173869	UVRAG-201	UV radiation resistance-associated gene protein isoform X2 [Sus scrofa]	XP_020918186.1
Chr09_133375350_133400084	Pig.10251	0.0878616	-3.50862	0.0313168	0.200517	yes	down	0.0340197	0.0324024	0.0533413	0.0171449	0	0	0.0399211	0.00571496	EMSY-205	BRCA2-interacting transcriptional repressor EMSY isoform X1 [Sus scrofa]	XP_013834604.1
Chr09_140208927_140230748		12.7824	3.67609	0.0225034	0.160237	yes	up	0	0	0	0.0171449	0.0596853	0	0	0.0256101	#N/A	#N/A	#N/A
Chr09_16536395_16537017	Pig.04694	0.379527	-1.39772	0.046487	0.259572	yes	down	0.0816472	0.0194414	0.0666766	0.0257173	0.0511588	0.0180793	0.0559217	0.0316518	CEP350	LOW QUALITY PROTEIN: centrosome-associated protein 350 [Sus scrofa]	XP_020919409.1
Chr09_23271876_23286452	Pig.04645	5.46232	2.44951	2.89315e-06	0.000145541	yes	up	0.0612354	0.0518438	0.0733442	0.480057	0.8697	0.280229	0.0621412	0.543329	SUCO-201	LOW QUALITY PROTEIN: SUN domain-containing ossification factor [Sus scrofa]	XP_003357586.3
Chr09_23700528_23704503	Pig.04643	0.078194	-3.6768	9.04242e-05	0.00245637	yes	down	0.292569	0.149051	0.11335	0.0428622	0	0.027119	0.18499	0.0233271	DNM3-201	dynamin-3 isoform X4 [Sus scrofa]	XP_020919297.1
Chr09_2529470_2539616	Pig.14419	11.267	3.49404	0.0422663	0.245858	yes	up	0	0	0	0.0257173	0.0426324	0	0	0.0227832	COBL	LOW QUALITY PROTEIN: protein cordon-bleu [Sus scrofa]	XP_020919590.1
Chr09_31155471_31162291		0.125607	-2.99301	0.036534	0.222771	yes	down	0.0340197	0.0194414	0.0333383	0.0171449	0	0	0.0289331	0.00571496	#N/A	#N/A	#N/A
Chr09_33510001_33515020	Pig.00298	0.452998	-1.14242	0.0485828	0.265702	yes	down	0.0816472	0.0712853	0.180027	0.0600071	0.0682118	0.0994362	0.110986	0.075885	KMT2E-201	histone-lysine N-methyltransferase 2E isoform X1 [Sus scrofa]	XP_013835277.2
Chr09_40198606_40202893	Pig.00327	15.369	3.94195	0.0115698	0.102879	yes	up	0	0	0	0.0257173	0.0170529	0.0451983	0	0.0293228	CACNA2D1-201	voltage-dependent calcium channel subunit alpha-2/delta-1 isoform X5 [Sus scrofa]	XP_013835239.1
Chr09_45493560_45496209	Pig.00341	95.7978	6.58192	9.27661e-07	5.53844e-05	yes	up	0	0	0	0.291463	0.196109	0.0903966	0	0.192656	ABCB1	LOW QUALITY PROTEIN: multidrug resistance protein 1-like [Sus scrofa]	XP_020919622.1
Chr09_46149144_46149865	Pig.00347	31.4349	4.9743	0.0013117	0.0203033	yes	up	0	0	0	0.0514346	0.119371	0.0180793	0	0.0629615	TRA2A-201	PREDICTED: transformer-2 protein homolog alpha isoform X3 [Hipposideros armiger]	NP_932770.2
Chr09_47585747_47596458	Pig.00356	36.2283	5.17905	0.0011086	0.0181417	yes	up	0	0	0	0.077152	0.0511588	0.0813569	0	0.0698892	RAPGEF5-202	rap guanine nucleotide exchange factor 5 isoform X1 [Sus scrofa]	XP_013845029.1
Chr09_53957225_53971274	Pig.00384	20.4939	4.35712	0.0283882	0.186723	yes	up	0	0	0	0.0342898	0.0596853	0.027119	0	0.0403647	AGMO-201	alkylglycerol monooxygenase isoform X1 [Sus scrofa]	XP_003130227.3
Chr09_53971179_54037551	Pig.00384	19.0369	4.25073	0.0121871	0.10594	yes	up	0	0	0	0.0428622	0.0426324	0.027119	0	0.0375378	AGMO-201	alkylglycerol monooxygenase isoform X1 [Sus scrofa]	XP_003130227.3
Chr09_54009268_54037551	Pig.00384	36.3549	5.18408	0.00520241	0.0581578	yes	up	0	0	0	0.0685795	0.0596853	0.0813569	0	0.0698739	AGMO-201	alkylglycerol monooxygenase isoform X1 [Sus scrofa]	XP_003130227.3
Chr09_60430146_60496454	Pig.00397	19.5815	4.29142	0.00730286	0.0750027	yes	up	0	0	0	0.0514346	0.0682118	0	0	0.0398821	GLCCI1-202	glucocorticoid-induced transcript 1 protein isoform X1 [Sus scrofa]	XP_020958076.1
Chr09_66539763_66565923	MSTRG.24574,Pig.00439	12.4038	3.63271	0.0242121	0.169081	yes	up	0	0	0	0	0.0341059	0.0361586	0	0.0234215	#N/A	#N/A	#N/A
Chr09_66549546_66558135	MSTRG.24574,Pig.00439	0.176895	-2.49903	0.0263454	0.177153	yes	down	0.0340197	0.0453634	0.0333383	0.0342898	0	0	0.0375738	0.0114299	#N/A	#N/A	#N/A
Chr09_8107518_8113176	Pig.14368	4.30867	2.10724	0.0153225	0.125561	yes	up	0	0.0194414	0.020003	0.111442	0.0852647	0.0813569	0.0131481	0.0926878	LPGAT1-201	acyl-CoA:lysophosphatidylglycerol acyltransferase 1 [Sus scrofa]	XP_003357646.2
Chr09_8107518_8117610	Pig.14368	6.17602	2.62668	2.39708e-11	5.20933e-09	yes	up	0.102059	0.0777657	0.160024	0.968686	1.26192	0.994362	0.113283	1.07499	LPGAT1-201	acyl-CoA:lysophosphatidylglycerol acyltransferase 1 [Sus scrofa]	XP_003357646.2
Chr09_9089267_9089937	Pig.14355	0.016646	-5.90868	0.00154621	0.023206	yes	down	0.0408236	0.0194414	0.146688	0	0	0	0.0689845	0	VASH2-201	vasohibin-2 isoform X1 [Sus scrofa]	EAW93371.1
Chr09_90951665_90967965		3.45159	1.78726	0.00413629	0.0491738	yes	up	0.0612354	0.0259219	0.0866795	0.222883	0.554221	0.135595	0.0579456	0.304233	#N/A	#N/A	#N/A
Chr09_92664524_92666467	MSTRG.25007,Pig.06854	0.345972	-1.53127	8.07986e-06	0.000330059	yes	down	0.319785	0.233297	0.606757	0.214311	0.196109	0.198872	0.386613	0.203097	#N/A	#N/A	#N/A
Chr09_95075653_95110016	Pig.12746	25.2483	4.65811	0.0054314	0.0598676	yes	up	0	0	0	0.0514346	0.0511588	0.0451983	0	0.0492639	SIK3-205	PREDICTED: serine/threonine-protein kinase SIK3 isoform X4 [Pongo abelii]	XP_029062906.1
Chr09_97772074_97773419	MSTRG.25157	0.053713	-4.21858	0.0338305	0.210539	yes	down	0.0612354	0.0972072	0.0400059	0	0	0.0180793	0.0661495	0.00602644	0	0	XP_020918527.1
Chr10_12010782_12017302	Pig.12142	100.078	6.64499	2.31765e-06	0.000121075	yes	up	0	0	0	0.231456	0.153477	0.198872	0	0.194602	NR5A2-201	nuclear receptor subfamily 5 group A member 2 isoform X1 [Sus scrofa]	XP_020919660.1
Chr10_16177546_16182624	Pig.10842,MSTRG.26263	31.986	4.99937	0.00894807	0.0857405	yes	up	0	0	0	0.0857244	0.0170529	0.0813569	0	0.0613781	#N/A	#N/A	#N/A
Chr10_16363_16990		0.0344246	-4.86042	0.0011768	0.0188045	yes	down	0.0476275	0.0259219	0.0133353	0	0	0	0.0289616	0	#N/A	#N/A	#N/A
Chr10_20827319_20840251	Pig.11166	18.6694	4.2226	0.0121256	0.105846	yes	up	0	0	0	0.0171449	0.0341059	0.0542379	0	0.0351629	MARC1	mitochondrial amidoxime-reducing component 1 isoform X1 [Sus scrofa]	XP_020919996.1
Chr10_20961970_20996575	Pig.11163	0.0231657	-5.43187	0.00552239	0.0604902	yes	down	0.0748433	0.0194414	0.0466736	0	0	0	0.0469861	0	MARK1-201	serine/threonine-protein kinase MARK1 isoform X1 [Sus scrofa]	XP_020919987.1
Chr10_20969083_20996575	Pig.11163	0.0575762	-4.11838	0.00112938	0.0183235	yes	down	0.0816472	0.0259219	0.0933472	0.0171449	0	0	0.0669721	0.00571496	MARK1-201	serine/threonine-protein kinase MARK1 isoform X1 [Sus scrofa]	XP_020919987.1
Chr10_22670141_22673756	Pig.11154	0.0237895	-5.39353	6.15332e-06	0.00026118	yes	down	0.176902	0.110168	0.173359	0.0171449	0	0	0.153476	0.00571496	TGFB2-201	transforming growth factor beta-2 isoform X1 [Sus scrofa]	XP_020919953.1
Chr10_22671725_22673756	Pig.11154	0.0441827	-4.50038	0.0277796	0.183398	yes	down	0.0408236	0	0.0400059	0	0	0	0.0269432	0	TGFB2-201	transforming growth factor beta-2 isoform X1 [Sus scrofa]	XP_020919953.1
Chr10_33762189_33772386	Pig.17816	77.8513	6.28265	4.35882e-06	0.000195715	yes	up	0	0	0	0.145731	0.153477	0.153674	0	0.150961	CFH	complement factor H precursor [Sus scrofa]	NP_999446.1
Chr10_33762189_33787163	Pig.17816	15.586	3.96218	0.0395258	0.233925	yes	up	0	0	0	0.0171449	0.0255794	0.0451983	0	0.0293075	CFH	complement factor H precursor [Sus scrofa]	NP_999446.1
Chr10_33786987_33844887		6.40929e+06	22.6117	0.0016017	0.0239067	yes	up	0	0	0	0	0	1.99776	0	0.665921	#N/A	#N/A	#N/A
Chr10_33794237_33815106	MSTRG.26482,Pig.17816	21.8239	4.44784	0.00504037	0.0569321	yes	up	0	0	0.0133353	0.0942968	0.255794	0.0813569	0.0044451	0.143816	#N/A	#N/A	#N/A
Chr10_34281541_34315347		4.01037	2.00374	8.30689e-17	7.52189e-14	yes	up	0.455864	0.27218	0.433398	2.59745	3.03542	1.68138	0.387147	2.43808	#N/A	#N/A	#N/A
Chr10_34546601_34557712	Pig.14079	0.3072	-1.70275	0.0176632	0.137043	yes	down	0.0816472	0.0453634	0.0533413	0.0342898	0.0255794	0.027119	0.0601173	0.028996	DIP2C-201	disco-interacting protein 2 homolog C isoform X1 [Sus scrofa]	XP_020920733.1
Chr10_34996942_35005772	Pig.14086	4.20834	2.07325	0.0140369	0.118236	yes	up	0	0.012961	0.0266706	0.077152	0.102318	0.0813569	0.0132105	0.0869422	WDR37-201	WD repeat-containing protein 37 isoform X1 [Sus scrofa]	XP_020919692.1
Chr10_39638817_39683690	Pig.17648	32.528	5.02361	0.0148291	0.123334	yes	up	0	0	0	0.111442	0.0596853	0.027119	0	0.066082	SFMBT2-202	scm-like with four MBT domains protein 2 [Sus scrofa]	XP_020920665.1
Chr10_39752709_39756855	Pig.17648	61.4673	5.94175	0.000107226	0.00286975	yes	up	0	0	0	0.145731	0.127897	0.0903966	0	0.121342	SFMBT2-202	scm-like with four MBT domains protein 2 [Sus scrofa]	XP_020920665.1
Chr10_39752709_39765278		21.0563	4.39618	4.65595e-13	1.40532e-10	yes	up	0.0136079	0.0194414	0.0266706	0.685795	0.716224	0.569498	0.0199066	0.657172	#N/A	#N/A	#N/A
Chr10_39956443_39981513	Pig.17647	0.0267951	-5.22189	0.0372226	0.2247	yes	down	0.0544315	0.0453634	0	0	0	0	0.0332649	0	ITIH5-201	inter-alpha-trypsin inhibitor heavy chain H5 [Sus scrofa]	XP_003130868.2
Chr10_44021920_44023990	Pig.20499	20.8717	4.38347	0.00770498	0.0775595	yes	up	0	0	0	0.0257173	0.0596853	0.0361586	0	0.0405204	DHTKD1-201	probable 2-oxoglutarate dehydrogenase E1 component DHKTD1, mitochondrial isoform X1 [Sus scrofa]	XP_020920651.1
Chr10_44106330_44112944	Pig.20502,MSTRG.26646	8.11462	3.02052	0.00284039	0.0371852	yes	up	0.0272157	0	0	0.137159	0.102318	0.0903966	0.00907191	0.109958	#N/A	#N/A	#N/A
Chr10_46687555_46712915	Pig.09685	86.8014	6.43965	1.28843e-05	0.00048779	yes	up	0	0	0	0.0942968	0.255794	0.153674	0	0.167922	PARD3-201	LOW QUALITY PROTEIN: partitioning defective 3 homolog [Sus scrofa]	XP_020919890.1
Chr10_46727592_46739239	Pig.09685	47.5761	5.57217	0.0125635	0.108174	yes	up	0	0	0	0.120014	0.0682118	0.0903966	0	0.0928742	PARD3-201	LOW QUALITY PROTEIN: partitioning defective 3 homolog [Sus scrofa]	XP_020919890.1
Chr10_46803012_46813745	Pig.09685	2.64239	1.40184	0.00446966	0.0525807	yes	up	0.0748433	0.012961	0.133353	0.377187	0.324006	0.162714	0.0737191	0.287969	PARD3-201	LOW QUALITY PROTEIN: partitioning defective 3 homolog [Sus scrofa]	XP_020919890.1
Chr10_50121653_50166888		18.6866	4.22393	0.0258841	0.176075	yes	up	0	0	0	0.0257173	0.0255794	0.0542379	0	0.0351782	#N/A	#N/A	#N/A
Chr10_50166736_50177028		32.3072	5.01379	0.0193585	0.144471	yes	up	0	0	0	0.137159	0.0341059	0.027119	0	0.066128	#N/A	#N/A	#N/A
Chr10_50761217_50794597	Pig.09670	2.0433	1.0309	0.0156892	0.127319	yes	up	0.102059	0.0907267	0.186694	0.38576	0.554221	0.27119	0.126493	0.403723	MLLT10-201	protein AF-10 isoform X3 [Sus scrofa]	XP_020920583.1
Chr10_51001706_51035324	Pig.09669	29.5567	4.88541	0.0324457	0.205932	yes	up	0	0	0	0.0428622	0.0426324	0.0813569	0	0.0556172	DNAJC1-201	dnaJ homolog subfamily C member 1 [Sus scrofa]	XP_005668217.2
Chr10_53378097_53378498	Pig.16905	0.177991	-2.49013	0.0172666	0.135759	yes	down	0.115667	0.0583243	0.160024	0.0171449	0.0341059	0.0361586	0.111338	0.0291365	ARHGAP21-201	LOW QUALITY PROTEIN: rho GTPase-activating protein 21 [Sus scrofa]	XP_020920575.1
Chr10_55203503_55208964	Pig.16891	3.91373	1.96855	0.00179648	0.026167	yes	up	0.0612354	0.012961	0.0733442	0.334325	0.375165	0.153674	0.0491802	0.287721	ACBD5-201	acyl-CoA-binding domain-containing protein 5 isoform X4 [Sus scrofa]	XP_020920544.1
Chr10_57501680_57515799	Pig.13792,MSTRG.26836	19.042	4.25112	0.000269918	0.00603484	yes	up	0	0.0194414	0	0.145731	0.341059	0.189833	0.00648048	0.225541	#N/A	#N/A	#N/A
Chr10_59009139_59060429	Pig.13798	0.0376192	-4.73239	0.026415	0.177176	yes	down	0.0612354	0	0.0333383	0	0	0	0.0315246	0	RSU1-201	ras suppressor protein 1 isoform X1 [Sus scrofa]	XP_020920486.1
Chr10_59057202_59060429	Pig.13798	0.0280523	-5.15574	0.000843108	0.0146814	yes	down	0.0408236	0.0324024	0.0333383	0	0	0	0.0355214	0	RSU1-201	ras suppressor protein 1 isoform X1 [Sus scrofa]	XP_020920486.1
Chr10_61821398_61830599	Pig.05022	0.0946004	-3.40201	0.0165302	0.132266	yes	down	0.0544315	0.0388829	0.0133353	0.0171449	0	0	0.0355499	0.00571496	ARHGAP12-201	rho GTPase-activating protein 12 isoform X5 [Sus scrofa]	XP_013835673.1
Chr10_61821398_61834204	Pig.05022	0.186095	-2.42589	0.033047	0.207806	yes	down	0.0340197	0.0324024	0.0800119	0.0257173	0.0170529	0	0.0488113	0.0142568	ARHGAP12-201	rho GTPase-activating protein 12 isoform X5 [Sus scrofa]	XP_013835673.1
Chr10_61841725_61864145	Pig.05022	0.432918	-1.20783	0.00193867	0.0275612	yes	down	0.299373	0.220336	0.420062	0.274318	0.119371	0.235031	0.313257	0.209573	ARHGAP12-201	rho GTPase-activating protein 12 isoform X5 [Sus scrofa]	XP_013835673.1
Chr10_61852304_61864145	Pig.05022	0.0171351	-5.8669	0.00118628	0.0188395	yes	down	0.0680393	0.0518438	0.0533413	0	0	0	0.0577415	0	ARHGAP12-201	rho GTPase-activating protein 12 isoform X5 [Sus scrofa]	XP_013835673.1
Chr10_62251864_62267849	Pig.05023	0.0195869	-5.67397	0.00232964	0.0315634	yes	down	0.0816472	0.0583243	0	0	0	0	0.0466572	0	ZEB1-201	LOW QUALITY PROTEIN: zinc finger E-box-binding homeobox 1 [Sus scrofa]	XP_020919855.1
Chr10_62251864_62267949	Pig.05023	0.278916	-1.8421	3.32826e-09	5.16642e-07	yes	down	0.63957	0.298102	0.373389	0.240028	0.187582	0.144634	0.43702	0.190748	ZEB1-201	LOW QUALITY PROTEIN: zinc finger E-box-binding homeobox 1 [Sus scrofa]	XP_020919855.1
Chr10_71649637_71659985	MSTRG.27025,Pig.05070	3.77839	1.91777	0.0293754	0.191186	yes	up	0.0204118	0	0.0133353	0.0942968	0.0426324	0.0542379	0.011249	0.0637224	#N/A	#N/A	#N/A
Chr10_71673526_71700050	MSTRG.27025	0.451672	-1.14665	0.00577808	0.0624411	yes	down	0.217726	0.162012	0.286709	0.154304	0.179056	0.135595	0.222149	0.156318	0	0	XP_020920352.1
Chr10_71924540_71931190	Pig.05072	0.359455	-1.47612	0.0477457	0.262819	yes	down	0.0952551	0.0324024	0.0666766	0	0.0682118	0.0361586	0.064778	0.0347901	UBAP1-202	ubiquitin-associated protein 1 isoform X3 [Sus scrofa]	XP_020919707.1
Chr10_73318405_73340619		47.2691	5.56283	0.00117393	0.0188045	yes	up	0	0	0	0.077152	0.170529	0.0361586	0	0.0946134	#N/A	#N/A	#N/A
Chr10_75878857_75880339	MSTRG.27145,Pig.09943	72.7417	6.18471	0.000467967	0.00908792	yes	up	0	0	0	0.180021	0.196109	0.0632776	0	0.146469	#N/A	#N/A	#N/A
Chr10_75879157_75880339	MSTRG.27145,Pig.09943	6.54408	2.71019	1.64617e-14	9.93741e-12	yes	up	0.19051	0.123129	0.273374	2.93177	1.41539	1.60906	0.195671	1.98541	#N/A	#N/A	#N/A
Chr10_75910144_75913576	MSTRG.27145,Pig.09943	12.328	3.62387	0.013121	0.111651	yes	up	0.0136079	0	0	0.137159	0.127897	0	0.00453596	0.0883521	#N/A	#N/A	#N/A
Chr10_79750648_79751650	Pig.09964,MSTRG.27211	10.3654	3.37371	4.60709e-07	3.05248e-05	yes	up	0.0340197	0	0.020003	0.325753	0.204635	0.298309	0.0180075	0.276232	#N/A	#N/A	#N/A
Chr11_11019668_11027351	Pig.03524	2.29113	1.19606	0.00475526	0.0546201	yes	up	0.217726	0.0907267	0.180027	0.548636	0.562747	0.578538	0.162826	0.563307	WASF3-201	wiskott-Aldrich syndrome protein family member 3 isoform X1 [Sus scrofa]	XP_020921162.1
Chr11_1141966_1143058	Pig.20214	0.0065366	-7.25724	1.77782e-05	0.0006272	yes	down	0.15649	0.12961	0.173359	0	0	0	0.153153	0	Col4a1	collagen alpha-1(IV) chain [Castor canadensis]	XP_020921569.1
Chr11_12201402_12245406	Pig.03511	0.390108	-1.35806	0.006199	0.0661695	yes	down	0.129275	0.0583243	0.193362	0.0857244	0.102318	0.0361586	0.126987	0.0747336	PAN3-201	PAB-dependent poly(A)-specific ribonuclease subunit PAN3 isoform X1 [Sus scrofa]	XP_005668351.1
Chr11_12275090_12285784	Pig.03511	0.0504341	-4.30946	0.0263464	0.177153	yes	down	0.0544315	0.0712853	0.0666766	0.0171449	0	0	0.0641311	0.00571496	PAN3-201	PAB-dependent poly(A)-specific ribonuclease subunit PAN3 isoform X1 [Sus scrofa]	XP_005668351.1
Chr11_12275090_12291797	Pig.03511	0.0213436	-5.55005	0.000860275	0.0149325	yes	down	0.0476275	0.0324024	0.0666766	0	0	0	0.0489022	0	PAN3-201	PAB-dependent poly(A)-specific ribonuclease subunit PAN3 isoform X1 [Sus scrofa]	XP_005668351.1
Chr11_12275090_12300096	Pig.03511	0.0882781	-3.5018	0.00046028	0.00902781	yes	down	0.0952551	0.0777657	0.0600089	0.0342898	0	0	0.0776766	0.0114299	PAN3-201	PAB-dependent poly(A)-specific ribonuclease subunit PAN3 isoform X1 [Sus scrofa]	XP_005668351.1
Chr11_12464386_12465127	Pig.03510	0.0565677	-4.14388	0.000414441	0.00833948	yes	down	0.0680393	0.0518438	0.0800119	0	0	0.0180793	0.0666317	0.00602644	FLT1-201	vascular endothelial growth factor receptor 1 isoform X2 [Sus scrofa]	XP_001925775.5
Chr11_15344825_15350790	Pig.03492	0.0588334	-4.08722	0.0187064	0.141746	yes	down	0	0.0388829	0	0	0	0	0.012961	0	FRY	LOW QUALITY PROTEIN: protein furry homolog [Sus scrofa]	XP_020920836.1
Chr11_16633418_16634541		0.0123885	-6.33485	0.0491193	0.267132	yes	down	0.122471	0.0583243	0.0666766	0	0	0	0.0824906	0	#N/A	#N/A	#N/A
Chr11_24635785_24644297		42.1512	5.3975	0.000232318	0.00541813	yes	up	0	0	0	0.0257173	0.187582	0.0361586	0	0.0831528	#N/A	#N/A	#N/A
Chr11_25906891_25912394		0.129955	-2.94391	4.14818e-06	0.000191489	yes	down	0.170098	0.252739	0.240036	0.0342898	0.0937912	0.0180793	0.220958	0.0487201	#N/A	#N/A	#N/A
Chr11_2628220_2629833	Pig.18467	0.25382	-1.97812	0.00260361	0.0345854	yes	down	0.0952551	0.0907267	0.153356	0.077152	0.0426324	0.0180793	0.113113	0.0459545	ATP11A-201	probable phospholipid-transporting ATPase IH isoform X1 [Sus scrofa]	XP_020921597.1
Chr11_28120886_28152319	Pig.07328	0.0149832	-6.06051	0.000201104	0.00479209	yes	down	0.0476275	0.0518438	0.106683	0	0	0	0.068718	0	EPSTI1-201	epithelial-stromal interaction protein 1 isoform X1 [Sus scrofa]	XP_003482944.1
Chr11_29171746_29198981		3.49106	1.80367	0.0104305	0.096049	yes	up	0.0408236	0.0324024	0.0466736	0.274318	0.238741	0.153674	0.0399665	0.222244	#N/A	#N/A	#N/A
Chr11_34579623_34579988	Pig.07349	0.0618448	-4.0152	0.0215368	0.155347	yes	down	0.0748433	0.0518438	0.0666766	0	0	0.0180793	0.0644546	0.00602644	PCDH17-201	protocadherin-17 isoform X1 [Sus scrofa]	XP_020921306.1
Chr11_4429771_4437719	Pig.03585	63.1459	5.98062	0.000111664	0.00296063	yes	up	0	0	0	0.0942968	0.102318	0.162714	0	0.119776	FAH-201	fumarylacetoacetase [Sus scrofa]	XP_003356696.1
Chr11_4445554_4455476	Pig.03585	17.7407	4.14899	0.000258547	0.00587734	yes	up	0.0204118	0	0	0.205739	0.127897	0.198872	0.00680393	0.177503	FAH-201	fumarylacetoacetase [Sus scrofa]	XP_003356696.1
Chr11_50455535_50541934	Pig.04491	5.53755	2.46925	0.0177947	0.137043	yes	up	0.0136079	0	0.0333383	0.197166	0.119371	0.0632776	0.0156487	0.126605	KLF12-202	PREDICTED: Krueppel-like factor 12 [Orycteropus afer afer]	XP_007946493.1
Chr11_50504248_50541934	Pig.04491	3.21974	1.68694	0.0333266	0.208936	yes	up	0	0.0388829	0.0533413	0.128587	0.162003	0.189833	0.0307414	0.160141	KLF12-202	PREDICTED: Krueppel-like factor 12 [Orycteropus afer afer]	XP_007946493.1
Chr11_52240171_52246948	Pig.04495	0.0666243	-3.90781	0.0451869	0.256072	yes	down	0	0.012961	0.0333383	0	0	0	0.0154331	0	UCHL3-202	ubiquitin carboxyl-terminal hydrolase isozyme L3 [Sus scrofa]	NP_001070695.1
Chr11_56028794_56032206	Pig.04511	4.55926	2.1888	1.1793e-06	6.67412e-05	yes	up	0.0680393	0.0194414	0.106683	0.488629	0.503062	0.334467	0.0647211	0.442053	NDFIP2-202	NEDD4 family-interacting protein 2 [Sus scrofa]	XP_001926612.1
Chr11_56028794_56037997	Pig.04511	13.0911	3.71051	1.78277e-13	6.45718e-11	yes	up	0.108863	0.0324024	0.0933472	1.36302	1.84172	1.37403	0.0782042	1.52625	NDFIP2-202	NEDD4 family-interacting protein 2 [Sus scrofa]	XP_001926612.1
Chr11_56028794_56044515	Pig.04511	44.1299	5.46369	5.11319e-06	0.00022224	yes	up	0.0136079	0	0	0.325753	0.306953	0.27119	0.00453596	0.301298	NDFIP2-202	NEDD4 family-interacting protein 2 [Sus scrofa]	XP_001926612.1
Chr11_56028794_56048891	Pig.04511	6.3999	2.67805	0.000134435	0.00344522	yes	up	0.0476275	0	0.0266706	0.248601	0.341059	0.117516	0.0247661	0.235725	NDFIP2-202	NEDD4 family-interacting protein 2 [Sus scrofa]	XP_001926612.1
Chr11_56028794_56052028		11.1956	3.48486	0.000708688	0.0128343	yes	up	0	0.0194414	0.0133353	0.171449	0.238741	0.207912	0.0109256	0.206034	#N/A	#N/A	#N/A
Chr11_56037904_56048891	Pig.04511	0.0451179	-4.47016	0.00893061	0.0857244	yes	down	0	0	0.0800119	0	0	0	0.0266706	0	NDFIP2-202	NEDD4 family-interacting protein 2 [Sus scrofa]	XP_001926612.1
Chr11_6994653_6999362	Pig.03552	4.33785	2.11698	0.027054	0.180349	yes	up	0.0272157	0	0.020003	0.171449	0.0682118	0.0632776	0.0157396	0.100979	PARP4-202	poly [ADP-ribose]	XP_020921664.1
Chr11_7001257_7015265	Pig.03552	24.5697	4.61881	0.00699389	0.0726535	yes	up	0	0	0	0.0171449	0.110844	0.0180793	0	0.0486894	PARP4-202	poly [ADP-ribose]	XP_020921664.1
Chr11_7171337_7181961	Pig.03550	2.66864	1.41611	0.0294168	0.191186	yes	up	0.0884511	0	0.0800119	0.291463	0.14495	0.198872	0.0561543	0.211762	PSPC1-201	paraspeckle component 1 isoform X2 [Sus scrofa]	XP_020921078.1
Chr11_7202378_7206596	Pig.03549	0.105219	-3.24853	0.0121565	0.105846	yes	down	0.0476275	0.0259219	0.0866795	0.0257173	0	0	0.0534097	0.00857244	ZMYM5	zinc finger MYM-type protein 5 isoform X3 [Sus scrofa]	XP_020921084.1
Chr11_73469919_73470694		0.204035	-2.29311	2.47708e-06	0.000128171	yes	down	0.19051	0.174973	0.406727	0.111442	0.0596853	0.0723172	0.257403	0.0811481	#N/A	#N/A	#N/A
Chr11_76033061_76067275	Pig.07939	9.19894	3.20147	0.0390511	0.232382	yes	up	0	0	0.0133353	0.0685795	0.0682118	0.0451983	0.0044451	0.0606632	PCCA-204	propionyl-CoA carboxylase alpha chain, mitochondrial isoform X1 [Sus scrofa]	XP_020921525.1
Chr11_7619806_7628690	Pig.03545	0.0591501	-4.07948	0.0215579	0.155347	yes	down	0.0204118	0.0453634	0.120018	0	0.0170529	0	0.061931	0.00568432	IFT88-201	intraflagellar transport protein 88 homolog [Sus scrofa]	XP_020921093.1
Chr11_76729156_76730764	Pig.07943	0.0336373	-4.8938	0.0138146	0.116726	yes	down	0.0408236	0	0.0666766	0	0	0	0.0358334	0	NALCN	sodium leak channel non-selective protein isoform X1 [Sus scrofa]	XP_020921537.1
Chr11_81152042_81152325	Pig.07954	0.0246182	-5.34413	0.00453614	0.0529997	yes	down	0.0204118	0.012961	0.106683	0	0	0	0.0466851	0	EFNB2-201	EFNB2 [Sus scrofa]	AHA44850.1
Chr11_82932722_82970009	Pig.07964	23.8502	4.57593	0.0340212	0.211158	yes	up	0	0	0	0.0514346	0.0426324	0.0451983	0	0.0464218	MYO16	LOW QUALITY PROTEIN: unconventional myosin-XVI [Sus scrofa]	XP_020921564.1
Chr11_82932722_82981452	Pig.07964	38.2577	5.25768	0.00576536	0.0624411	yes	up	0	0	0	0.0514346	0.0767383	0.0903966	0	0.0728565	MYO16	LOW QUALITY PROTEIN: unconventional myosin-XVI [Sus scrofa]	XP_020921564.1
Chr11_82963694_82981452	Pig.07964	26.9431	4.75184	0.0222127	0.159001	yes	up	0	0	0	0.0600071	0.0426324	0.0542379	0	0.0522925	MYO16	LOW QUALITY PROTEIN: unconventional myosin-XVI [Sus scrofa]	XP_020921564.1
Chr11_9492371_9494613	Pig.03533	20.6872	4.37067	0.0389867	0.232253	yes	up	0	0	0	0.0600071	0.0682118	0	0	0.0427396	Spata13	LOW QUALITY PROTEIN: spermatogenesis-associated protein 13 [Sus scrofa]	XP_020921131.1
Chr11_9839884_9854924	Pig.03531	0.101299	-3.3033	0.00418087	0.0495954	yes	down	0.0476275	0.0453634	0.0800119	0	0	0.027119	0.0576676	0.00903966	MTMR6-201	PREDICTED: myotubularin-related protein 6 [Equus caballus]	XP_001491744.2
Chr11_9854447_9854924	Pig.03531	0.333103	-1.58596	0.00116662	0.0188045	yes	down	0.122471	0.0842462	0.140021	0.0685795	0.0937912	0.0180793	0.115579	0.06015	MTMR6-201	PREDICTED: myotubularin-related protein 6 [Equus caballus]	XP_001491744.2
Chr12_1424577_1425218	Pig.18315	9.10682	3.18695	0.00766758	0.0775595	yes	up	0.0204118	0	0	0.111442	0.0937912	0.0723172	0.00680393	0.0925167	SEPTIN9-201	LOW QUALITY PROTEIN: septin-9 [Sus scrofa]	XP_005653913.2
Chr12_15327650_15371282	Pig.18677,MSTRG.28969	2.7655	1.46754	0.0165701	0.13239	yes	up	0.0748433	0.0583243	0.0333383	0.325753	0.213162	0.216952	0.055502	0.251955	#N/A	#N/A	#N/A
Chr12_15371151_15382081	Pig.18677,MSTRG.28969	16.126	4.01131	0.0472611	0.261523	yes	up	0	0	0	0.0514346	0.0170529	0.027119	0	0.0318689	#N/A	#N/A	#N/A
Chr12_16681780_16720000		0.0639945	-3.96591	0.0170533	0.134667	yes	down	0.0340197	0.012961	0	0	0	0	0.0156602	0	#N/A	#N/A	#N/A
Chr12_18397123_18397927	Pig.19653	5.64285	2.49642	0.00995392	0.0930803	yes	up	0	0	0.0266706	0.0857244	0.0852647	0.0542379	0.00889021	0.0750757	METTL16-201	methyltransferase-like protein 16 isoform X4 [Sus scrofa]	XP_020923280.1
Chr12_21007643_21024830	Pig.11860	0.102519	-3.28603	0.000612974	0.0113933	yes	down	0.0816472	0.0194414	0.0666766	0.0257173	0	0	0.0559217	0.00857244	SSH1-201	LOW QUALITY PROTEIN: protein phosphatase Slingshot homolog 2 [Sus scrofa]	XP_020923177.1
Chr12_21186043_21202762	Pig.11854	0.0507053	-4.30172	0.00816518	0.0815467	yes	down	0.0476275	0	0.020003	0	0	0	0.0225435	0	TAOK1-202	PREDICTED: serine/threonine-protein kinase TAO1 [Camelus ferus]	NP_001193029.1
Chr12_22739009_22740998	Pig.11812	0.0445874	-4.48722	0.0198256	0.147061	yes	down	0.0272157	0	0.0533413	0	0	0	0.0268523	0	KSR1-201	kinase suppressor of Ras 1 isoform X3 [Sus scrofa]	XP_005669140.1
Chr12_24249907_24256251	Pig.11795	2.30043	1.2019	0.0335744	0.209667	yes	up	0.0612354	0.0194414	0.0666766	0.214311	0.162003	0.135595	0.0491178	0.170636	ZNF207-205	PREDICTED: BUB3-interacting and GLEBS motif-containing protein ZNF207 isoform X3 [Ovis aries]	XP_020923110.1
Chr12_27226046_27254638		26.7289	4.74033	0.0146225	0.122034	yes	up	0	0	0	0.137159	0	0.027119	0	0.0547593	#N/A	#N/A	#N/A
Chr12_27312206_27315092	MSTRG.29412	3.29046e-08	-24.8571	1.70422e-07	1.34189e-05	yes	down	0	1.67196	4.40065	0	0	0	2.02421	0	0	0	XP_020923050.1
Chr12_27312206_27323763	MSTRG.29412,Pig.11225	3.03886e-08	-24.9719	0.000138979	0.00351198	yes	down	5.17099	0	0	0	0	0	1.72366	0	#N/A	#N/A	#N/A
Chr12_27312206_27337243	MSTRG.29412	0.0309724	-5.01287	0.00318272	0.0404012	yes	down	0.0476275	0.0324024	0.0133353	0	0	0	0.0311217	0	0	0	XP_020923050.1
Chr12_27312206_27348924	MSTRG.29412,Pig.11225	0.000393017	-11.3131	2.19705e-12	5.96828e-10	yes	down	2.40179	1.65252	4.0206	0	0	0	2.69164	0	#N/A	#N/A	#N/A
Chr12_27312212_27323763	MSTRG.29412,Pig.11225	0.0161528	-5.95207	0.02969	0.192719	yes	down	0.0408236	0.103688	0	0	0	0	0.0481704	0	#N/A	#N/A	#N/A
Chr12_27312212_27331982	MSTRG.29412,Pig.11225	0.0227279	-5.45939	0.0188112	0.142342	yes	down	0.0408236	0.0194414	0.0866795	0	0	0	0.0489815	0	#N/A	#N/A	#N/A
Chr12_27312212_27340379	MSTRG.29412	0.0237337	-5.39692	0.0364267	0.222366	yes	down	0.0544315	0.0259219	0.0533413	0	0	0	0.0445649	0	0	0	XP_020923050.1
Chr12_27312212_27348924	MSTRG.29412,Pig.11225	0.0232138	-5.42887	0.024685	0.170628	yes	down	0.0748433	0.0194414	0.0466736	0	0	0	0.0469861	0	#N/A	#N/A	#N/A
Chr12_27337142_27348924	MSTRG.29412	0.0216195	-5.53153	0.000237058	0.00548058	yes	down	0	0.861904	2.66039	0.0685795	0.0341059	0.0180793	1.1741	0.0402549	0	0	XP_020923050.1
Chr12_27353284_27357916	MSTRG.29412,Pig.11225	0.0204466	-5.61199	0.00712666	0.0738192	yes	down	0.0408236	0.0259219	0.0933472	0	0	0	0.0533642	0	#N/A	#N/A	#N/A
Chr12_28048634_28069283	Pig.11217	0.0536013	-4.22159	0.045731	0.256795	yes	down	0	0.012961	0.0466736	0	0	0	0.0198782	0	ACACA-203	acetyl-CoA carboxylase 1 isoform X1 [Sus scrofa]	XP_020921886.1
Chr12_28082367_28086865	Pig.11217	0.463453	-1.1095	0.0184339	0.140662	yes	down	0.244942	0.103688	0.206697	0.137159	0.196109	0.0632776	0.185109	0.132182	ACACA-203	acetyl-CoA carboxylase 1 isoform X1 [Sus scrofa]	XP_020921886.1
Chr12_30807267_30853831		40.847	5.35216	0.00192041	0.0275419	yes	up	0	0	0	0.0342898	0.119371	0.0813569	0	0.0783391	#N/A	#N/A	#N/A
Chr12_30845859_30853831		123.288	6.94589	7.2546e-07	4.58305e-05	yes	up	0	0	0	0.231456	0.230215	0.25311	0	0.23826	#N/A	#N/A	#N/A
Chr12_31796253_31823882	Pig.11176	0.345524	-1.53314	0.000197745	0.00477718	yes	down	0.22453	0.0907267	0.273374	0.128587	0.0682118	0.108476	0.19621	0.101758	RAD51C-201	DNA repair protein RAD51 homolog 3 isoform X1 [Sus scrofa]	XP_020922938.1
Chr12_32551425_32554892		6.55738	2.71312	0.0403704	0.23763	yes	up	0.0136079	0	0	0.0514346	0.0170529	0.0632776	0.00453596	0.0439217	#N/A	#N/A	#N/A
Chr12_3458862_3478097	Pig.19814	14.5774	3.86566	0.0164522	0.131836	yes	up	0	0	0	0.0342898	0.0341059	0.0180793	0	0.028825	EIF4A3-201	eukaryotic initiation factor 4A-III [Bos taurus]	NP_001039653.1
Chr12_3474168_3478097	Pig.19814	3.00721	1.58843	0.00236086	0.0318277	yes	up	0.0544315	0.0324024	0.0400059	0.214311	0.179056	0.198872	0.0422799	0.197413	EIF4A3-201	eukaryotic initiation factor 4A-III [Bos taurus]	NP_001039653.1
Chr12_35602425_35606295	MSTRG.29616,Pig.13391	35.5305	5.15098	0.00118525	0.0188395	yes	up	0	0	0	0.0857244	0.0596853	0.0632776	0	0.0695624	#N/A	#N/A	#N/A
Chr12_40853263_40853381	MSTRG.29689	0.000770222	-10.3424	1.69049e-13	6.45718e-11	yes	down	1.25192	1.70437	0.42673	0	0	0	1.12767	0	0	0	OWK14899.1
Chr12_47059189_47062026		0.0438123	-4.51252	2.69479e-06	0.00013683	yes	down	0.258549	0.13609	0.253371	0.0257173	0	0.0180793	0.216003	0.0145989	#N/A	#N/A	#N/A
Chr12_48467152_48485307		169.432	7.40456	0.00461901	0.0538473	yes	up	0	0	0	0.694368	0.375165	0	0	0.356511	#N/A	#N/A	#N/A
Chr12_48468550_48486979		0.00464214	-7.75099	4.22821e-06	0.000191489	yes	down	0.102059	0.27218	0.206697	0	0	0	0.193645	0	#N/A	#N/A	#N/A
Chr12_48474181_48487671		1.25762e+07	23.5842	0.000996869	0.0168951	yes	up	0	0	0	0	2.08899	1.5277	0	1.20556	#N/A	#N/A	#N/A
Chr12_48587972_48592895		0.155434	-2.68563	0.00118939	0.0188395	yes	down	0.108863	0.0388829	0.106683	0.0342898	0.0255794	0	0.0848094	0.0199564	#N/A	#N/A	#N/A
Chr12_48595782_48599010	Pig.19046	0.134857	-2.8905	0.00650558	0.0682332	yes	down	0.0476275	0	0.0866795	0.0257173	0	0	0.044769	0.00857244	EZH1-201	histone-lysine N-methyltransferase EZH1 [Sus scrofa]	NP_001230135.1
Chr12_48641949_48684250		0.00585172	-7.41692	3.32756e-06	0.000164351	yes	down	0	0.200895	0.280042	0	0	0	0.160312	0	#N/A	#N/A	#N/A
Chr12_5009982_5022738	Pig.20964	0.425935	-1.2313	0.0107733	0.0982066	yes	down	0.129275	0.0972072	0.100015	0.0342898	0.0852647	0.0994362	0.108832	0.0729969	FOXK2-201	forkhead box protein K2 isoform X1 [Sus scrofa]	XP_003357968.2
Chr12_52735137_52745435	Pig.08065	0.0890246	-3.48965	0.0189001	0.142774	yes	down	0.0680393	0.0194414	0.0533413	0	0	0.0180793	0.0469407	0.00602644	PECAM1-201	platelet endothelial cell adhesion molecule precursor [Sus scrofa]	NP_999072.1
Chr12_52955532_52968212	Pig.08060	30.034	4.90852	0.0130494	0.11165	yes	up	0	0	0	0.0685795	0.0426324	0.0632776	0	0.0581632	SMURF2-201	PREDICTED: E3 ubiquitin-protein ligase SMURF2 [Camelus ferus]	ELK12456.1
Chr12_55637737_55645324	Pig.08039	24.3248	4.60436	0.0262887	0.177153	yes	up	0	0	0	0.0342898	0.0511588	0.0542379	0	0.0465622	ARSG-201	arylsulfatase G isoform X1 [Sus scrofa]	XP_013845359.1
Chr12_6014140_6037875		2.73567	1.4519	0.00295604	0.0385136	yes	up	0.0884511	0.0388829	0.0666766	0.462912	0.187582	0.180793	0.0646702	0.277096	#N/A	#N/A	#N/A
Chr12_6014140_6064248		0.0421789	-4.56733	0.0430073	0.249369	yes	down	0.0612354	0.012961	0	0	0	0	0.0247321	0	#N/A	#N/A	#N/A
Chr12_6060022_6064248	Pig.19289	2.73045	1.44914	0.0137887	0.116689	yes	up	0.102059	0.0453634	0.0533413	0.402905	0.264321	0.198872	0.0669212	0.288699	NCOR1	LOW QUALITY PROTEIN: nuclear receptor corepressor 1 [Sus scrofa]	XP_020921950.1
Chr12_6060022_6072546	Pig.19289	23.2667	4.5402	0.010841	0.0983443	yes	up	0	0	0	0.0428622	0.0682118	0.027119	0	0.0460643	NCOR1	LOW QUALITY PROTEIN: nuclear receptor corepressor 1 [Sus scrofa]	XP_020921950.1
Chr12_6061278_6072546	Pig.19289	18.739	4.22797	0.0114221	0.102235	yes	up	0	0	0	0.0857244	0	0.027119	0	0.0376145	NCOR1	LOW QUALITY PROTEIN: nuclear receptor corepressor 1 [Sus scrofa]	XP_020921950.1
Chr12_61007740_61009484	Pig.07996	21.3355	4.41518	0.0167091	0.13272	yes	up	0	0	0	0.0685795	0.0426324	0.0180793	0	0.0430971	NAT9	N-acetyltransferase 9 isoform X1 [Sus scrofa]	XP_005668672.1
Chr12_6481490_6485518	Pig.19284	0.463088	-1.11064	0.036661	0.223295	yes	down	0.142883	0.0907267	0.100015	0.111442	0.0426324	0.0903966	0.111208	0.0814902	AKAP10-203	A-kinase anchor protein 10, mitochondrial [Sus scrofa]	NP_999303.1
Chr12_6535923_6536562		0.0302205	-5.04833	0.000313357	0.00665026	yes	down	0.0680393	0.0712853	0.240036	0	0.0170529	0	0.126453	0.00568432	#N/A	#N/A	#N/A
Chr12_6541810_6554029		0.0886199	-3.49623	0.000422293	0.00838793	yes	down	0.108863	0.116649	0.2267	0.0257173	0	0.0361586	0.150737	0.0206253	#N/A	#N/A	#N/A
Chr12_6541810_6560705		0.0839561	-3.57422	0.00443712	0.0524063	yes	down	0.176902	0.0453634	0.120018	0	0.0426324	0	0.114094	0.0142108	#N/A	#N/A	#N/A
Chr12_6974079_7002516		2.28362	1.19132	0.0410775	0.240749	yes	up	0.0816472	0.0583243	0.0800119	0.231456	0.238741	0.307348	0.0733278	0.259182	#N/A	#N/A	#N/A
Chr12_6986673_7002516		3.04733	1.60755	0.0463914	0.259469	yes	up	0.0408236	0.0388829	0	0.248601	0.0767383	0.0994362	0.0265688	0.141592	#N/A	#N/A	#N/A
Chr12_7000916_7002516		16.1474	4.01323	0.00498367	0.0565267	yes	up	0	0.012961	0	0.120014	0.14495	0.117516	0.00432032	0.127493	#N/A	#N/A	#N/A
Chr13_101257566_101258125		14.5909	3.867	0.0448675	0.255519	yes	up	0	0	0	0	0.0255794	0.0542379	0	0.0266058	#N/A	#N/A	#N/A
Chr13_101290645_101300295	Pig.06518	33.7266	5.07582	0.00194926	0.0275612	yes	up	0	0	0	0.077152	0.0255794	0.0903966	0	0.064376	MAP3K13-201	mitogen-activated protein kinase kinase kinase 13 [Sus scrofa]	XP_020925639.1
Chr13_101669786_101691624		0.0980472	-3.35038	0.0086985	0.0846505	yes	down	0.0408236	0.0259219	0.0466736	0	0.0170529	0	0.0378064	0.00568432	#N/A	#N/A	#N/A
Chr13_10234909_10274147		0.0370886	-4.75288	0.000801462	0.0140463	yes	down	0.0272157	0.012961	0.0466736	0	0	0	0.0289501	0	#N/A	#N/A	#N/A
Chr13_102467284_102479788	MSTRG.32189,Pig.06534	78.8044	6.30021	1.97045e-06	0.000108136	yes	up	0	0	0	0.162876	0.153477	0.144634	0	0.153662	#N/A	#N/A	#N/A
Chr13_102470212_102478285	MSTRG.32189,Pig.06534	53.8603	5.75115	7.92282e-05	0.00220742	yes	up	0	0	0	0.137159	0.110844	0.0723172	0	0.106773	#N/A	#N/A	#N/A
Chr13_102470212_102479788	MSTRG.32189,Pig.06534	637.435	9.31613	1.45352e-14	9.87124e-12	yes	up	0	0	0	1.48303	1.20223	1.06668	0	1.25065	#N/A	#N/A	#N/A
Chr13_102470212_102498161	MSTRG.32189,Pig.06534	48.4449	5.59827	5.07354e-05	0.00148998	yes	up	0	0	0	0.0685795	0.102318	0.108476	0	0.0931244	#N/A	#N/A	#N/A
Chr13_102490154_102498161	MSTRG.32189,Pig.06534	29.3421	4.8749	0.030419	0.196512	yes	up	0	0	0	0.0685795	0.0170529	0.0813569	0	0.0556631	#N/A	#N/A	#N/A
Chr13_102744260_102753420	Pig.06539	39.4634	5.30244	0.00112983	0.0183235	yes	up	0	0	0	0.111442	0.0170529	0.0994362	0	0.075977	ST6GAL1-201	beta-galactoside alpha-2,6-sialyltransferase 1 isoform X1 [Sus scrofa]	XP_020925678.1
Chr13_103965370_103965570		0.0809515	-3.6268	0.0381029	0.227988	yes	down	0.0204118	0.0777657	0	0.0171449	0	0	0.0327258	0.00571496	#N/A	#N/A	#N/A
Chr13_105669263_105669434		23.2022	4.53619	0.0433559	0.250855	yes	up	0	0	0	0.0428622	0.0255794	0.0632776	0	0.0439064	#N/A	#N/A	#N/A
Chr13_110953548_110983363	Pig.15072	0.127964	-2.96619	0.00358633	0.0442744	yes	down	0.0748433	0.012961	0.106683	0	0.0170529	0.0180793	0.0648289	0.0117108	DLG1-202	disks large homolog 1 isoform X1 [Sus scrofa]	XP_020925751.1
Chr13_110994124_111031107	Pig.15072	0.184909	-2.43511	0.0272185	0.181001	yes	down	0.0952551	0.0388829	0.020003	0	0.0170529	0.027119	0.0513803	0.014724	DLG1-202	disks large homolog 1 isoform X1 [Sus scrofa]	XP_020925751.1
Chr13_111996329_112001406		40.0325	5.3231	0.00136596	0.020926	yes	up	0	0	0	0.0942968	0.0682118	0.0723172	0	0.0782753	#N/A	#N/A	#N/A
Chr13_112476399_112488858	Pig.15042	0.148541	-2.75106	0.00765904	0.0775595	yes	down	0.0748433	0.0194414	0.0600089	0.0171449	0.0170529	0	0.0514312	0.0113993	LRCH3-202	leucine-rich repeat and calponin homology domain-containing protein 3 isoform X1 [Sus scrofa]	XP_005670199.1
Chr13_113016848_113038677		2.37423	1.24746	0.000199599	0.00477718	yes	up	0.272157	0.0388829	0.253371	0.694368	0.699171	0.560459	0.188137	0.651332	#N/A	#N/A	#N/A
Chr13_113525036_113525569	Pig.02190	0.0416685	-4.5849	0.0178083	0.137043	yes	down	0	0.0324024	0.0333383	0	0	0	0.0219136	0	HEG1	protein HEG homolog 1 [Sus scrofa]	XP_020925878.1
Chr13_113904848_113948236	Pig.02185	38.8402	5.27948	0.00719436	0.0742133	yes	up	0	0	0	0.0685795	0.0852647	0.0723172	0	0.0753872	TRIO-201	PREDICTED: kalirin isoform X8 [Ovis aries musimon]	XP_025137194.1
Chr13_113922653_113948236	Pig.02185	69.649	6.12203	1.82537e-05	0.000639823	yes	up	0	0	0	0.171449	0.110844	0.126555	0	0.136283	TRIO-201	PREDICTED: kalirin isoform X8 [Ovis aries musimon]	XP_025137194.1
Chr13_113946119_113948236	Pig.02185	85.2513	6.41365	3.90199e-05	0.00119804	yes	up	0	0	0	0.111442	0.187582	0.189833	0	0.162952	TRIO-201	PREDICTED: kalirin isoform X8 [Ovis aries musimon]	XP_025137194.1
Chr13_119129735_119141267	MSTRG.32525,Pig.02129	0.258479	-1.95188	0.0176736	0.137043	yes	down	0.0884511	0.0324024	0.133353	0.0428622	0.0170529	0.0361586	0.0847356	0.0320246	#N/A	#N/A	#N/A
Chr13_12610744_12611230	Pig.10929	4.65575	2.21901	0.0480688	0.26433	yes	up	0	0	0.0266706	0.077152	0.0596853	0.0451983	0.00889021	0.0606785	NEK4-203	serine/threonine-protein kinase Nek4 isoform X2 [Sus scrofa]	XP_020924589.1
Chr13_126149254_126150599	Pig.02084	0.276208	-1.85617	0.00142174	0.0215763	yes	down	0.503491	0.324024	0.673433	0.334325	0.221688	0.0994362	0.500316	0.218483	PHLDB2-201	LOW QUALITY PROTEIN: pleckstrin homology-like domain family B member 2 [Sus scrofa]	XP_020926050.1
Chr13_126189693_126191041	Pig.02084	9.62479	3.26675	0.00396818	0.0476971	yes	up	0	0	0.0266706	0.111442	0.213162	0.0542379	0.00889021	0.12628	PHLDB2-201	LOW QUALITY PROTEIN: pleckstrin homology-like domain family B member 2 [Sus scrofa]	XP_020926050.1
Chr13_126189693_126223532		21.7023	4.43978	0.00335774	0.0421307	yes	up	0	0	0	0.0342898	0.0767383	0.0180793	0	0.0430358	#N/A	#N/A	#N/A
Chr13_12656906_12657860	MSTRG.30947,MSTRG.30945	51.8634	5.69665	0.00462851	0.0538473	yes	up	0	0	0	0.111442	0.102318	0.0903966	0	0.101385	#N/A	#N/A	#N/A
Chr13_126811720_126814276	Pig.02081	125.05	6.96637	7.87559e-06	0.000324152	yes	up	0	0	0	0.154304	0.366638	0.207912	0	0.242951	NECTIN3-201	nectin-3 isoform X2 [Sus scrofa]	XP_020926054.1
Chr13_126811720_126850038	Pig.02081	13.0722	3.70843	2.75603e-14	1.29952e-11	yes	up	0.0680393	0.0259219	0.0466736	0.925824	0.89528	0.967243	0.0468783	0.929449	NECTIN3-201	nectin-3 isoform X2 [Sus scrofa]	XP_020926054.1
Chr13_126811720_126850641	Pig.02081	48.7685	5.60788	0.000423025	0.00838793	yes	up	0	0	0	0.102869	0.102318	0.0813569	0	0.0955146	NECTIN3-201	nectin-3 isoform X2 [Sus scrofa]	XP_020926054.1
Chr13_126831531_126850038	Pig.02081	33.1701	5.05181	0.0330225	0.207806	yes	up	0	0	0	0.0342898	0.0511588	0.0994362	0	0.0616283	NECTIN3-201	nectin-3 isoform X2 [Sus scrofa]	XP_020926054.1
Chr13_126832355_126850038	Pig.02081	22.2015	4.47259	9.83339e-32	5.34248e-28	yes	up	0.19051	0.0583243	0.106683	3.91761	4.57019	3.48931	0.118506	3.99237	NECTIN3-201	nectin-3 isoform X2 [Sus scrofa]	XP_020926054.1
Chr13_126832355_126850641	Pig.02081	136.984	7.09787	5.77633e-08	5.70596e-06	yes	up	0	0	0	0.31718	0.221688	0.26215	0	0.267006	NECTIN3-201	nectin-3 isoform X2 [Sus scrofa]	XP_020926054.1
Chr13_126837639_126850038	Pig.02081	7.58305	2.92278	1.18128e-05	0.00045842	yes	up	0.0408236	0	0.0333383	0.291463	0.298427	0.235031	0.0247206	0.274974	NECTIN3-201	nectin-3 isoform X2 [Sus scrofa]	XP_020926054.1
Chr13_132164238_132184644	Pig.02057,MSTRG.32657	11.6756	3.54542	0.0282268	0.185886	yes	up	0	0	0.0133353	0.0514346	0.0596853	0.108476	0.0044451	0.0731986	#N/A	#N/A	#N/A
Chr13_153226350_153311960	Pig.00962,MSTRG.32815	0.176298	-2.50391	0.0122957	0.106505	yes	down	0.176902	0.0648048	0.0666766	0.0171449	0	0.0632776	0.102795	0.0268075	#N/A	#N/A	#N/A
Chr13_16282681_16289820	Pig.10910,MSTRG.30983	0.307002	-1.70368	0.0327068	0.206864	yes	down	0.0544315	0.0453634	0.0866795	0.0257173	0.0170529	0.0451983	0.0621581	0.0293228	#N/A	#N/A	#N/A
Chr13_16849956_16853113	Pig.10906	0.0540773	-4.20883	0.0117492	0.103581	yes	down	0.0340197	0.0194414	0	0	0	0	0.0178204	0	APPL1-201	DCC-interacting protein 13-alpha [Sus scrofa]	NP_001128438.1
Chr13_169351797_169415970	Pig.15023	0.000387502	-11.3335	6.58481e-07	4.20885e-05	yes	down	2.53787	2.35889	2.69373	0	0	0	2.53016	0	APP-203	PREDICTED: amyloid beta A4 protein, partial [Galeopterus variegatus]	NP_999537.1
Chr13_17207927_17208194	Pig.10900	0.171769	-2.54146	0.00172615	0.0252102	yes	down	0.108863	0.0583243	0.0866795	0.0171449	0.0511588	0	0.0846223	0.0227679	DENND6A-201	protein DENND6A isoform X1 [Sus scrofa]	XP_020924668.1
Chr13_17222303_17225946	Pig.10900	0.0308486	-5.01865	0.0294187	0.191186	yes	down	0.0204118	0.0259219	0.0533413	0	0	0	0.033225	0	DENND6A-201	protein DENND6A isoform X1 [Sus scrofa]	XP_020924668.1
Chr13_17238049_17243345	Pig.10900	0.0853068	-3.5512	0.0378405	0.22742	yes	down	0.0136079	0	0.0266706	0	0	0	0.0134262	0	DENND6A-201	protein DENND6A isoform X1 [Sus scrofa]	XP_020924668.1
Chr13_179900839_179909050	Pig.13973	9.90835	3.30864	0.0436411	0.251701	yes	up	0	0	0	0.0257173	0.0341059	0	0	0.0199411	MORC3-203	MORC family CW-type zinc finger protein 3 isoform X1 [Sus scrofa]	XP_003132812.1
Chr13_181944033_181946060	Pig.20121	0.0358695	-4.8011	0.0112603	0.10112	yes	down	0.0340197	0.0194414	0.0333383	0	0	0	0.0289331	0	ERG-201	transcriptional regulator ERG isoform X1 [Sus scrofa]	XP_020924127.1
Chr13_184808515_184809456	Pig.15081	0.0737089	-3.76202	0.0349992	0.21608	yes	down	0.0204118	0.0259219	0.133353	0	0	0.0180793	0.0598956	0.00602644	MX2-201	interferon-induced GTP-binding protein MX2 [Sus scrofa]	BAN84472.1
Chr13_188539138_188539513	Pig.21788,MSTRG.33300	0.0193532	-5.69128	0.00484436	0.0554525	yes	down	0.15649	0.233297	0.0866795	0	0.0170529	0	0.158822	0.00568432	#N/A	#N/A	#N/A
Chr13_188650608_188651323	Pig.20313	48.044	5.58628	0.000569898	0.0107137	yes	up	0	0	0	0.120014	0.14495	0.027119	0	0.0973611	Ftcd	formimidoyltransferase-cyclodeaminase [Sus scrofa]	NP_999440.1
Chr13_228475_229511		30.1908	4.91603	0.00168377	0.0247912	yes	up	0	0	0	0.0685795	0.0852647	0.027119	0	0.0603211	#N/A	#N/A	#N/A
Chr13_23944679_23949381	Pig.01523	0.0196324	-5.67062	0.0106699	0.0977567	yes	down	0.0884511	0.012961	0.0733442	0	0	0	0.0582521	0	ADAMTS9-201	A disintegrin and metalloproteinase with thrombospondin motifs 9 isoform X2 [Sus scrofa]	XP_003132346.4
Chr13_28511452_28518709	Pig.01536	2.55098	1.35105	0.0337656	0.210377	yes	up	0.0408236	0.0194414	0.0400059	0.145731	0.179056	0.0723172	0.0334237	0.132368	FRMD4B-204	FERM domain-containing protein 4B isoform X4 [Sus scrofa]	XP_020924862.1
Chr13_4355865_4359504	Pig.07846	0.269605	-1.89108	0.00167023	0.0246586	yes	down	0.122471	0.116649	0.260039	0.0942968	0.119371	0	0.166386	0.0712225	SNRK-201	SNF-related serine/threonine-protein kinase isoform X1 [Sus scrofa]	XP_020927373.1
Chr13_43912003_43913833	Pig.19014	0.050368	-4.31135	0.045218	0.256072	yes	down	0	0.0194414	0.0400059	0	0	0	0.0198158	0	TTLL3	tubulin monoglycylase TTLL3 isoform X2 [Sus scrofa]	XP_020924967.1
Chr13_46154665_46165821	Pig.14691,MSTRG.31383	0.00623394	-7.32564	3.60066e-07	2.57399e-05	yes	down	0.244942	0.103688	0.153356	0	0	0	0.167328	0	#N/A	#N/A	#N/A
Chr13_46154665_46178093	Pig.14691,MSTRG.31383	0.0229252	-5.44692	0.00546791	0.0600145	yes	down	0.0612354	0.0324024	0.0400059	0	0	0	0.0445479	0	#N/A	#N/A	#N/A
Chr13_48146150_48147848	MSTRG.31444,Pig.17823,MSTRG.31443	0.0231281	-5.43421	0.000252746	0.00576963	yes	down	0.0272157	0.0583243	0.0333383	0	0	0	0.0396261	0	#N/A	#N/A	#N/A
Chr13_48514433_48516059	Pig.17826	0.015564	-6.00564	2.34556e-05	0.00078663	yes	down	0.0544315	0.0259219	0.133353	0	0	0	0.0712355	0	FBLN2-201	fibulin-2 isoform X1 [Sus scrofa]	XP_020925041.1
Chr13_52653182_52713934		1.71446e+09	30.6751	1.86312e-05	0.000648868	yes	up	0	0	0	0.548636	0.0170529	0.813569	0	0.459753	#N/A	#N/A	#N/A
Chr13_618153_635677	Pig.07791	21.2118	4.40679	0.0214571	0.155228	yes	up	0	0	0	0.0257173	0.0511588	0.0451983	0	0.0406915	OXSR1-201	serine/threonine-protein kinase OSR1 [Sus scrofa]	NP_999507.1
Chr13_67354140_67355382	MSTRG.31731,Pig.04766	53.4077	5.73898	0.00189775	0.0274946	yes	up	0	0	0	0.0942968	0.0852647	0.126555	0	0.102039	#N/A	#N/A	#N/A
Chr13_67357897_67377692	MSTRG.31731,Pig.04766	241.077	7.91335	4.0038e-09	6.0424e-07	yes	up	0	0	0	0.42005	0.562747	0.424864	0	0.46922	#N/A	#N/A	#N/A
Chr13_67379126_67387509	MSTRG.31731,Pig.04766	36.0899	5.17352	0.00768928	0.0775595	yes	up	0	0	0	0.0171449	0.127897	0.0632776	0	0.0694399	#N/A	#N/A	#N/A
Chr13_67382409_67387509	MSTRG.31731,Pig.04766	21.1438	4.40216	0.0204526	0.149756	yes	up	0	0	0	0.0342898	0.0426324	0.0451983	0	0.0407068	#N/A	#N/A	#N/A
Chr13_70616611_70654615	MSTRG.31828	17.7985	4.15369	0.0105694	0.0969991	yes	up	0	0	0	0.0171449	0.0596853	0.027119	0	0.0346497	0	0	XP_004478869.1
Chr13_7202646_7225593	MSTRG.30668	57.4565	5.8444	0.0144773	0.121195	yes	up	0	0	0	0.0342898	0.187582	0.108476	0	0.110116	0	0	XP_003358456.1
Chr13_7622540_7653595	MSTRG.30700,Pig.07899	5.46752	2.45089	0.0362323	0.221678	yes	up	0.0136079	0.012961	0	0.0257173	0.110844	0.0994362	0.00885628	0.0786659	#N/A	#N/A	#N/A
Chr13_7626662_7653595	MSTRG.30700,Pig.07899	2.58014	1.36745	0.0168362	0.133534	yes	up	0.0952551	0.0194414	0.0333383	0.171449	0.170529	0.225991	0.0493449	0.189323	#N/A	#N/A	#N/A
Chr13_7644063_7653595	MSTRG.30700,Pig.07899	3.42917	1.77786	3.25671e-05	0.00102276	yes	up	0.115667	0.012961	0.126685	0.342898	0.468956	0.451983	0.0851044	0.421279	#N/A	#N/A	#N/A
Chr13_86632258_86638860	Pig.11305	32.3696	5.01657	0.00100444	0.0168951	yes	up	0	0	0	0.120014	0.0596853	0.0180793	0	0.0659263	SEC62-201	translocation protein SEC62 [Sus scrofa]	XP_006764151.1
Chr13_86777964_86815919	Pig.11303	0.274996	-1.86252	5.941e-05	0.00171689	yes	down	0.183706	0.174973	0.253371	0.128587	0.0682118	0.0723172	0.204017	0.0897052	PHC3-201	polyhomeotic-like protein 3 isoform X1 [Sus scrofa]	XP_020925436.1
Chr13_86777964_86842481	Pig.11303	0.142586	-2.8101	0.0237631	0.166844	yes	down	0.0408236	0.0194414	0.0600089	0	0.0255794	0	0.0400913	0.00852647	PHC3-201	polyhomeotic-like protein 3 isoform X1 [Sus scrofa]	XP_020925436.1
Chr13_86791164_86815919	Pig.11303	0.348902	-1.51911	0.0116417	0.103349	yes	down	0.0884511	0.0583243	0.0933472	0.0257173	0.0682118	0.0361586	0.0800409	0.0433626	PHC3-201	polyhomeotic-like protein 3 isoform X1 [Sus scrofa]	XP_020925436.1
Chr13_86804294_86815919	Pig.11303	0.428049	-1.22415	0.00433516	0.0513135	yes	down	0.183706	0.123129	0.306712	0.154304	0.119371	0.126555	0.204516	0.13341	PHC3-201	polyhomeotic-like protein 3 isoform X1 [Sus scrofa]	XP_020925436.1
Chr13_86835359_86842481	Pig.11303	0.0928694	-3.42865	0.00845421	0.0830592	yes	down	0	0.0324024	0.0866795	0	0.0170529	0	0.039694	0.00568432	PHC3-201	polyhomeotic-like protein 3 isoform X1 [Sus scrofa]	XP_020925436.1
Chr13_86836296_86842481	Pig.11303	0.318324	-1.65143	0.00112734	0.0183235	yes	down	0.632766	0.311063	1.14684	0.214311	0.630959	0.144634	0.696889	0.329968	PHC3-201	polyhomeotic-like protein 3 isoform X1 [Sus scrofa]	XP_020925436.1
Chr13_88741695_88746200	Pig.11291	0.468156	-1.09494	0.0423114	0.245858	yes	down	0.142883	0.0648048	0.253371	0.154304	0.14495	0.027119	0.153686	0.108791	FNDC3B-201	fibronectin type III domain-containing protein 3B isoform X1 [Sus scrofa]	XP_020925459.1
Chr13_88784575_88811118	Pig.11291	0.0380551	-4.71577	0.0369378	0.224293	yes	down	0.0204118	0.012961	0.0533413	0	0	0	0.0289047	0	FNDC3B-201	fibronectin type III domain-containing protein 3B isoform X1 [Sus scrofa]	XP_020925459.1
Chr13_9373192_9382165	Pig.15883	6.32993	2.66219	0.0149027	0.123424	yes	up	0.0340197	0	0	0.102869	0.153477	0.0632776	0.0113399	0.106541	ARIH2-204	E3 ubiquitin-protein ligase ARIH2 isoform X1 [Sus scrofa]	XP_003132245.3
Chr13_98711348_98734424	Pig.06481	0.263971	-1.92155	0.0464207	0.259469	yes	down	0.0612354	0.0453634	0.0666766	0	0.0341059	0.0361586	0.0577584	0.0234215	ATP11B	probable phospholipid-transporting ATPase IF isoform X5 [Sus scrofa]	XP_020925528.1
Chr13_98873441_98889700	Pig.06482	3.91094	1.96751	0.0292665	0.190966	yes	up	0.0204118	0.0194414	0.0133353	0.111442	0.187582	0.0451983	0.0177295	0.114741	MCCC1-201	DCN1-like protein 1 isoform 1 [Homo sapiens]	NP_065691.2
Chr13_99531418_99551463		0.0584224	-4.09733	0.022652	0.161084	yes	down	0.0204118	0	0.0400059	0	0	0	0.0201392	0	#N/A	#N/A	#N/A
Chr14_101787913_101794200	Pig.01974	2.57121	1.36245	0.0302929	0.19593	yes	up	0.0272157	0.0324024	0.0333383	0.145731	0.127897	0.108476	0.0309855	0.127368	IDE-202	insulin-degrading enzyme isoform X1 [Sus scrofa]	XP_001925416.3
Chr14_104062358_104147272		152.501	7.25267	5.89408e-08	5.7134e-06	yes	up	0	0	0	0.111442	0.562747	0.216952	0	0.297047	#N/A	#N/A	#N/A
Chr14_104135799_104147272	Pig.01952	79.736	6.31716	2.29304e-05	0.000773794	yes	up	0	0	0	0.0257173	0.383691	0.0632776	0	0.157562	CYP2C42-206	cytochrome P450 2C18 [Sus scrofa]	XP_020929678.1
Chr14_105872313_105893018	Pig.01934	0.0212207	-5.55839	0.0240769	0.16857	yes	down	0	0.0648048	0.0600089	0	0	0	0.0416046	0	TM9SF3-201	transmembrane 9 superfamily member 3 isoform X1 [Aotus nancymaae]	XP_001101439.1
Chr14_108871875_108873556	Pig.01895	37.8415	5.2419	0.0011076	0.0181417	yes	up	0	0	0	0.111442	0.0596853	0.0542379	0	0.0751217	ABCC2-202	LOW QUALITY PROTEIN: canalicular multispecific organic anion transporter 1 [Sus scrofa]	XP_020929369.1
Chr14_109086258_109091278	Pig.01892	46.5774	5.54156	0.00510714	0.0574474	yes	up	0	0	0	0.154304	0.0937912	0.0361586	0	0.0947513	CPN1-201	carboxypeptidase N catalytic chain isoform X1 [Sus scrofa]	XP_003483585.1
Chr14_109843813_109855780	Pig.21784	96.2612	6.58888	0.00122749	0.0192189	yes	up	0	0	0	0.540064	0.0426324	0.027119	0	0.203272	CYP2C42-206	cytochrome P450 2C18 [Sus scrofa]	XP_013839051.2
Chr14_112746957_112780847	Pig.16330	0.0625233	-3.99946	0.0120216	0.105344	yes	down	0.272157	0.012961	0.0466736	0	0	0.027119	0.110597	0.00903966	SH3PXD2A-201	SH3 and PX domain-containing protein 2A isoform X1 [Sus scrofa]	XP_020928421.1
Chr14_113362657_113380470		8.62407	3.10837	2.87029e-14	1.29952e-11	yes	up	0.673589	0.187934	0.400059	5.32349	4.95388	5.74018	0.420528	5.33918	#N/A	#N/A	#N/A
Chr14_11639751_11660315	Pig.05713	0.0332389	-4.91098	0.000579716	0.0108607	yes	down	0.170098	0.0583243	0.11335	0	0.0170529	0	0.113924	0.00568432	SPECC1L	cytospin-A isoform X1 [Sus scrofa]	XP_020929455.1
Chr14_120756086_120760994	Pig.05127	44.0628	5.46149	0.000318208	0.00670086	yes	up	0	0	0	0.0600071	0.0937912	0.0994362	0	0.0844115	GPAM-201	NR:NA	F1S5L4.3
Chr14_120982040_120985676	Pig.05131	4.04252	2.01526	0.00770884	0.0775595	yes	up	0.0340197	0.012961	0.0333383	0.205739	0.153477	0.135595	0.026773	0.164937	ACSL5-201	long-chain-fatty-acid--CoA ligase 5 [Sus scrofa]	NP_001182250.1
Chr14_123885482_123894127	Pig.05149	0.140468	-2.83168	0.0329716	0.207806	yes	down	0	0.0453634	0.0600089	0.0257173	0	0	0.0351241	0.00857244	ATRNL1-201	attractin-like protein 1 isoform X2 [Sus scrofa]	XP_020930075.1
Chr14_129722138_129804031	MSTRG.35885,Pig.12074	6.12415	2.61451	2.08675e-05	0.000708582	yes	up	0.0204118	0.0194414	0.0800119	0.540064	0.298427	0.280229	0.039955	0.372907	#N/A	#N/A	#N/A
Chr14_129750351_129804031	MSTRG.35885,Pig.12074	5.78915	2.53335	3.82417e-07	2.66368e-05	yes	up	0.0612354	0.0453634	0.0400059	0.565781	0.375165	0.406784	0.0488682	0.449243	#N/A	#N/A	#N/A
Chr14_129783657_129804031	MSTRG.35885,Pig.12074	4.42096	2.14436	0.00743075	0.0757435	yes	up	0.0408236	0.0259219	0.020003	0.197166	0.170529	0.235031	0.0289162	0.200909	#N/A	#N/A	#N/A
Chr14_129787047_129804031	MSTRG.35885,Pig.12074	3.32255	1.73229	0.00387708	0.0471234	yes	up	0.0408236	0.0518438	0.0400059	0.222883	0.196109	0.289269	0.0442245	0.236087	#N/A	#N/A	#N/A
Chr14_132177917_132181521	Pig.12103	16.0029	4.00026	0.047713	0.262819	yes	up	0	0	0	0.0257173	0.0511588	0.0180793	0	0.0316518	OAT	ornithine aminotransferase, mitochondrial isoform X2 [Sus scrofa]	XP_005671603.1
Chr14_132182099_132186209	Pig.12103	31.6853	4.98574	0.0336446	0.209863	yes	up	0	0	0	0.0428622	0.0341059	0.0994362	0	0.0588014	OAT	ornithine aminotransferase, mitochondrial isoform X2 [Sus scrofa]	XP_005671603.1
Chr14_132637875_132640389	MSTRG.35947	5.29673	2.4051	6.19408e-08	5.80214e-06	yes	up	0.0884511	0.0453634	0.0933472	0.565781	0.784436	0.497181	0.0757206	0.615799	0	0	XP_001929044.4
Chr14_132665225_132670868	MSTRG.35947,Pig.11537	8.85694	3.14681	0.0246167	0.170373	yes	up	0	0.012961	0	0.0942968	0.0511588	0.0632776	0.00432032	0.0695778	#N/A	#N/A	#N/A
Chr14_134652537_134665988	Pig.11551	0.0279898	-5.15895	0.00120126	0.0189172	yes	down	0.0408236	0	0.0866795	0	0	0	0.042501	0	DOCK1-201	PREDICTED: dedicator of cytokinesis protein 1 isoform X1 [Bos taurus]	XP_025129625.1
Chr14_140353741_140355292	Pig.22737	77.5979	6.27795	1.56137e-05	0.000565529	yes	up	0	0	0	0.154304	0.196109	0.108476	0	0.152963	CYP2E1-202	cytochrome P450 2E1 isoform X1 [Sus scrofa]	XP_005657566.1
Chr14_18251903_18268937	Pig.10687	0.0478967	-4.38393	0.00345452	0.0428098	yes	down	0.122471	0.0518438	0.0533413	0	0.0170529	0	0.0758853	0.00568432	BICC1-201	protein bicaudal C homolog 1 isoform X1 [Sus scrofa]	XP_020928456.1
Chr14_18251903_18277779	Pig.10687	0.0168749	-5.88898	0.00345914	0.0428098	yes	down	0.0476275	0.0324024	0.11335	0	0	0	0.06446	0	BICC1-201	protein bicaudal C homolog 1 isoform X1 [Sus scrofa]	XP_020928456.1
Chr14_18956851_18968133		0.0370415	-4.75471	0.0148048	0.123334	yes	down	0.0476275	0.012961	0.0266706	0	0	0	0.0290864	0	#N/A	#N/A	#N/A
Chr14_19925712_19947453		35.4317	5.14697	2.52806e-05	0.000837497	yes	up	0.0136079	0	0	0.188594	0.358112	0.180793	0.00453596	0.2425	#N/A	#N/A	#N/A
Chr14_21583839_21588341	Pig.15735	0.0402901	-4.63343	0.00578095	0.0624411	yes	down	0.0272157	0.012961	0.0400059	0	0	0	0.0267275	0	DISC1-201	disrupted in schizophrenia 1 protein isoform X1 [Sus scrofa]	XP_020929235.1
Chr14_22954126_22963710	Pig.15740	10.163	3.34526	0.0170371	0.134667	yes	up	0.0136079	0	0	0.0857244	0.0170529	0.0994362	0.00453596	0.0674045	MAP3K21-201	mitogen-activated protein kinase kinase kinase MLK4 [Sus scrofa]	XP_001928249.1
Chr14_25995544_25998373		0.346154	-1.53051	0.0489608	0.266823	yes	down	0.108863	0.0453634	0.100015	0.0514346	0.0852647	0	0.084747	0.0455665	#N/A	#N/A	#N/A
Chr14_2997882_3000726	Pig.05846	0.368528	-1.44016	0.00192739	0.0275419	yes	down	0.210922	0.0842462	0.100015	0.077152	0.0852647	0.0632776	0.131728	0.0752314	SPPL3-201	signal peptide peptidase-like 3 isoform X2 [Sus scrofa]	XP_020928363.1
Chr14_38872467_38873175	Pig.07742	0.019236	-5.70004	0.00883056	0.0852157	yes	down	0.0748433	0.0453634	0.0333383	0	0	0	0.0511816	0	BMP1-201	LOW QUALITY PROTEIN: bone morphogenetic protein 1 [Sus scrofa]	XP_020927995.1
Chr14_39070772_39073187		33.6931	5.07438	0.00305448	0.0392317	yes	up	0	0	0	0.111442	0.0767383	0.0180793	0	0.0687531	#N/A	#N/A	#N/A
Chr14_41912046_41913507	Pig.07715	0.195776	-2.35272	0.000112257	0.00296063	yes	down	0.136079	0.149051	0.193362	0.0342898	0.0426324	0.0723172	0.159497	0.0497465	KCTD9-201	BTB/POZ domain-containing protein KCTD9 [Sus scrofa]	XP_003132863.3
Chr14_41912046_41931580	Pig.07715	0.0881723	-3.50353	9.60417e-08	8.63582e-06	yes	down	0.149687	0.110168	0.253371	0.0171449	0.0341059	0.0180793	0.171075	0.02311	KCTD9-201	BTB/POZ domain-containing protein KCTD9 [Sus scrofa]	XP_003132863.3
Chr14_41912046_41938885	Pig.07715	0.242406	-2.04451	0.00126346	0.0197252	yes	down	0.102059	0.123129	0.153356	0.0514346	0.0426324	0.0542379	0.126181	0.049435	KCTD9-201	BTB/POZ domain-containing protein KCTD9 [Sus scrofa]	XP_003132863.3
Chr14_41930481_41931580	Pig.07715	0.170695	-2.55051	2.5237e-07	1.90434e-05	yes	down	0.22453	0.103688	0.133353	0.0428622	0.0255794	0.0542379	0.153857	0.0408932	KCTD9-201	BTB/POZ domain-containing protein KCTD9 [Sus scrofa]	XP_003132863.3
Chr14_41930481_41938885	Pig.07715	0.399891	-1.32232	0.0242974	0.169241	yes	down	0.142883	0.123129	0.0666766	0.0857244	0.0341059	0.0994362	0.110896	0.0730888	KCTD9-201	BTB/POZ domain-containing protein KCTD9 [Sus scrofa]	XP_003132863.3
Chr14_42930420_42931617	Pig.05610	0.179879	-2.4749	0.0322757	0.205093	yes	down	0.0204118	0.0324024	0.0733442	0.0171449	0	0.0180793	0.0420528	0.0117414	DPYSL2-201	dihydropyrimidinase-related protein 2 isoform X1 [Sus scrofa]	XP_001927836.1
Chr14_47342240_47351646	Pig.05570	9.37046	3.22812	0.0103292	0.0954394	yes	up	0	0.0194414	0.0133353	0.145731	0.238741	0.153674	0.0109256	0.179382	FDFT1-202	squalene synthase [Sus scrofa]	NP_001161120.1
Chr14_47348104_47351646	Pig.05570	20.2259	4.33813	1.06983e-05	0.000424262	yes	up	0	0	0.0266706	0.222883	0.324006	0.244071	0.00889021	0.263653	FDFT1-202	squalene synthase [Sus scrofa]	NP_001161120.1
Chr14_47348104_47360714	Pig.05570	25.7639	4.68728	0.0378057	0.22742	yes	up	0	0	0	0.0342898	0.102318	0.0180793	0	0.0515623	FDFT1-202	squalene synthase [Sus scrofa]	NP_001161120.1
Chr14_52891611_52892805	Pig.05547	24.0091	4.58551	0.00381691	0.0464961	yes	up	0	0	0	0.102869	0.0255794	0.0180793	0	0.0488427	SH3RF1-201	E3 ubiquitin-protein ligase SH3RF1 isoform X1 [Sus scrofa]	XP_020928513.1
Chr14_61996195_61997739	Pig.07212,MSTRG.34617	0.04129	-4.59806	0.0101828	0.0947317	yes	down	0.0204118	0	0.0666766	0	0	0	0.0290295	0	#N/A	#N/A	#N/A
Chr14_62224776_62235789	Pig.07204	18.9513	4.24422	0.0319093	0.203239	yes	up	0	0	0	0.0514346	0.0341059	0.027119	0	0.0375532	MPHOSPH9-204	M-phase phosphoprotein 9 isoform X1 [Sus scrofa]	XP_013838241.2
Chr14_64265041_64269173	Pig.07164	7.42526	2.89244	0.012543	0.108168	yes	up	0	0	0.020003	0.111442	0.0767383	0.0361586	0.00666766	0.0747795	ATP2A2-201	sarcoplasmic/endoplasmic reticulum calcium ATPase 2 isoform X1 [Sus scrofa]	XP_020927734.1
Chr14_71395453_71403133	Pig.15466,MSTRG.34889	4.70995	2.23571	0.0258944	0.176075	yes	up	0.0204118	0	0.0133353	0.0942968	0.0767383	0.0632776	0.011249	0.0781042	#N/A	#N/A	#N/A
Chr14_74007619_74014948		0.0831443	-3.58824	0.0040929	0.0488719	yes	down	0.0340197	0.0194414	0.0866795	0	0.0170529	0	0.0467135	0.00568432	#N/A	#N/A	#N/A
Chr14_83277934_83281237		31.0446	4.95627	0.00136733	0.020926	yes	up	0	0	0	0.0342898	0.102318	0.0451983	0	0.0606019	#N/A	#N/A	#N/A
Chr14_85833418_85836812	Pig.19868	4.37737	2.13006	0.0121568	0.105846	yes	up	0.0136079	0.0583243	0	0.231456	0.255794	0.126555	0.0239774	0.204602	WAPL-201	wings apart-like protein homolog isoform X1 [Sus scrofa]	XP_013845907.2
Chr14_90028374_90034475	Pig.02027	0.24743	-2.01491	0.0260854	0.176756	yes	down	0.0612354	0	0.0600089	0	0.0426324	0	0.0404148	0.0142108	UBE2D1-203	NR:NA	NP_003329.1
Chr14_90028374_90037704	Pig.02027	3.53496	1.82169	0.0103247	0.0954394	yes	up	0	0.012961	0.0400059	0.077152	0.110844	0.0994362	0.0176556	0.0958108	UBE2D1-203	NR:NA	NP_003329.1
Chr14_9263882_9277104	Pig.05775	0.119613	-3.06355	0.0333931	0.209014	yes	down	0	0	0.0266706	0	0	0	0.00889021	0	MTMR3-201	myotubularin-related protein 3 isoform X1 [Sus scrofa]	XP_013838486.2
Chr14_97552461_97562490	Pig.02009,MSTRG.35312	16.8986	4.07884	0.0107284	0.0979624	yes	up	0	0	0	0.0171449	0.0341059	0.0451983	0	0.0321497	#N/A	#N/A	#N/A
Chr15_101673600_101675184	Pig.00067	0.157496	-2.66661	0.0350714	0.21628	yes	down	0.0272157	0.0777657	0.0600089	0	0.0170529	0.027119	0.0549968	0.014724	HECW1-201	E3 ubiquitin-protein ligase HECW2 [Sus scrofa]	NP_001185853.1
Chr15_106162756_106172493	Pig.00034	0.134587	-2.89339	0.0250054	0.171967	yes	down	0.0272157	0.0259219	0.0266706	0	0.0170529	0	0.0266028	0.00568432	NIF3L1-202	NIF3-like protein 1 isoform X1 [Sus scrofa]	XP_013839829.1
Chr15_106676742_106687338	MSTRG.37193,Pig.00024	2.93082	1.55131	0.0352786	0.217065	yes	up	0.0476275	0.012961	0.0133353	0.171449	0.0937912	0.0723172	0.0246413	0.112519	#N/A	#N/A	#N/A
Chr15_107692551_107693830	Pig.00015	0.211754	-2.23954	0.000359843	0.0074054	yes	down	0.108863	0.174973	0.220033	0.0171449	0.102318	0.0542379	0.167956	0.0579002	BMPR2-201	bone morphogenetic protein receptor type-2 precursor [Sus scrofa]	NP_001191829.1
Chr15_107798196_107838768	Pig.00014	26.0354	4.7024	0.00359378	0.0442744	yes	up	0	0	0	0.0257173	0.0596853	0.0632776	0	0.0495601	FAM117B-201	protein FAM117B isoform X1 [Sus scrofa]	XP_003133638.2
Chr15_107979484_107995904		32.2774	5.01245	0.000655528	0.012032	yes	up	0	0	0	0.102869	0.0341059	0.0542379	0	0.0637377	#N/A	#N/A	#N/A
Chr15_107979484_108030953		14.5946	3.86736	6.88743e-05	0.00195629	yes	up	0	0	0.0266706	0.35147	0.153477	0.0903966	0.00889021	0.198448	#N/A	#N/A	#N/A
Chr15_108009353_108030953		4.11108	2.03952	0.0407575	0.23939	yes	up	0	0.0194414	0.0133353	0.120014	0.0767383	0.0361586	0.0109256	0.077637	#N/A	#N/A	#N/A
Chr15_108430554_108445898	Pig.00008	0.0378504	-4.72355	2.85425e-05	0.000923044	yes	down	0.136079	0.155531	0.106683	0	0.0255794	0	0.132764	0.00852647	ABI2-201	PREDICTED: abl interactor 2 isoform X1 [Chinchilla lanigera]	XP_020930983.1
Chr15_108518521_108523889	Pig.00007	2.05309	1.03779	0.0317706	0.202593	yes	up	0.115667	0.0712853	0.0866795	0.377187	0.349585	0.171753	0.0912106	0.299509	RAPH1	LOW QUALITY PROTEIN: ras-associated and pleckstrin homology domains-containing protein 1 [Sus scrofa]	XP_020930982.1
Chr15_112413804_112429425		0.0563688	-4.14896	0.0373774	0.225384	yes	down	0.0204118	0.0259219	0	0	0	0	0.0154446	0	#N/A	#N/A	#N/A
Chr15_114471451_114507975	Pig.11726	8.92441	3.15776	0.0101075	0.0943537	yes	up	0	0	0.0133353	0.0514346	0.0937912	0.0361586	0.0044451	0.0604615	KANSL1L-201	LOW QUALITY PROTEIN: KAT8 regulatory NSL complex subunit 1-like protein [Sus scrofa]	XP_005672211.2
Chr15_114471451_114533637	Pig.11726	4.77293	2.25487	0.0010337	0.0171222	yes	up	0.0136079	0.0194414	0.020003	0.205739	0.119371	0.0813569	0.0176841	0.135489	KANSL1L-201	LOW QUALITY PROTEIN: KAT8 regulatory NSL complex subunit 1-like protein [Sus scrofa]	XP_005672211.2
Chr15_114471451_114560459		6.11107	2.61143	1.64532e-07	1.31456e-05	yes	up	0.0476275	0.0972072	0.0400059	0.651505	0.912333	0.397745	0.0616136	0.653861	#N/A	#N/A	#N/A
Chr15_114503744_114533637	MSTRG.37316,Pig.11726	2.92926	1.55053	0.00195307	0.0275612	yes	up	0.0544315	0.0259219	0.0400059	0.145731	0.272847	0.126555	0.0401198	0.181711	#N/A	#N/A	#N/A
Chr15_114503744_114560459	MSTRG.37316	4.68714	2.22871	1.29287e-05	0.00048779	yes	up	0.0544315	0.0518438	0.166691	0.728657	0.690644	0.5243	0.0909889	0.647867	0	0	XP_005672211.2
Chr15_114507778_114560459	MSTRG.37316	21.649	4.43623	0.0465722	0.259781	yes	up	0	0	0	0.0171449	0.0511588	0.0542379	0	0.0408472	0	0	XP_005672211.2
Chr15_114533496_114560459	MSTRG.37316	3.56035	1.83202	1.1996e-05	0.00046223	yes	up	0.163294	0.149051	0.140021	0.814382	1.27897	0.551419	0.150789	0.881591	0	0	XP_005672211.2
Chr15_114987303_114993898	Pig.11732	58.6939	5.87514	0.00368771	0.0450232	yes	up	0	0	0	0.128587	0.213162	0.0180793	0	0.119943	CPS1-201	LOW QUALITY PROTEIN: carbamoyl-phosphate synthase [ammonia]	XP_005672216.2
Chr15_119454916_119461643	MSTRG.37367,Pig.13892	9.57578	3.25939	0.0250467	0.172034	yes	up	0	0	0.0133353	0.0600071	0.0852647	0.0451983	0.0044451	0.06349	#N/A	#N/A	#N/A
Chr15_120053313_120060412	Pig.13890	10.0992	3.33617	0.000291779	0.00639207	yes	up	0.0136079	0.012961	0.0266706	0.360043	0.349585	0.144634	0.0177465	0.284754	PECR-201	peroxisomal trans-2-enoyl-CoA reductase [Sus scrofa]	XP_020930776.1
Chr15_120101001_120144708	Pig.13888	0.18742	-2.41565	0.00472016	0.0543318	yes	down	0.142883	0.0648048	0.0533413	0.0342898	0.0255794	0.0180793	0.0870096	0.0259828	XRCC5-201	X-ray repair cross-complementing protein 5 isoform X1 [Sus scrofa]	XP_003133697.3
Chr15_120101001_120172980	Pig.13888	0.0443348	-4.49542	0.037553	0.226192	yes	down	0.0408236	0	0.0400059	0	0	0	0.0269432	0	XRCC5-201	X-ray repair cross-complementing protein 5 isoform X1 [Sus scrofa]	XP_003133697.3
Chr15_120570504_120570627		0.0152898	-6.03129	0.000126734	0.00329447	yes	down	0.108863	0.27218	0.240036	0.0171449	0	0	0.207026	0.00571496	#N/A	#N/A	#N/A
Chr15_126481847_126499441		27.7656	4.79523	0.00448092	0.0525807	yes	up	0	0	0	0.0514346	0.0767383	0.0361586	0	0.0547772	#N/A	#N/A	#N/A
Chr15_130124934_130127004		3.55675	1.83056	0.00838037	0.0829336	yes	up	0.0136079	0	0.0800119	0.162876	0.187582	0.126555	0.0312066	0.159005	#N/A	#N/A	#N/A
Chr15_132634436_132653755	MSTRG.37615	3.19216	1.67453	0.0242618	0.16921	yes	up	0.0136079	0	0.0800119	0.0685795	0.162003	0.180793	0.0312066	0.137125	0	0	XP_020930742.1
Chr15_16010287_16016140	Pig.04255	0.0380161	-4.71725	0.0269749	0.180345	yes	down	0.0136079	0.0324024	0.0266706	0	0	0	0.024227	0	DARS-201	aspartate--tRNA ligase, cytoplasmic isoform X1 [Sus scrofa]	XP_003133314.1
Chr15_25222238_25299620		0.0583071	-4.10018	0.00213061	0.0295257	yes	down	1.5581	1.25721	1.54023	0.205739	0.230215	0	1.45185	0.145318	#N/A	#N/A	#N/A
Chr15_32024135_32060812	Pig.08949	0.00796617	-6.9719	8.33949e-07	5.14869e-05	yes	down	0.115667	0.0972072	0.173359	0	0	0	0.128744	0	PTPN4-201	band 4.1-like protein 5 isoform X1 [Sus scrofa]	KQK84396.1
Chr15_32075801_32147077		0.0759626	-3.71857	0.0142989	0.120071	yes	down	0.0136079	0.012961	0.0133353	0	0	0	0.0133014	0	#N/A	#N/A	#N/A
Chr15_32091371_32100097	Pig.08949	0.0518387	-4.26983	0.019868	0.147061	yes	down	0.0272157	0.012961	0.020003	0	0	0	0.0200599	0	PTPN4-201	band 4.1-like protein 5 isoform X1 [Sus scrofa]	KQK84396.1
Chr15_3699761_3737333	Pig.04234	0.0628751	-3.99137	0.0102328	0.0950336	yes	down	0.102059	0.0583243	0.100015	0	0.0255794	0	0.0867994	0.00852647	MBD5-201	methyl-CpG-binding domain protein 5 isoform X1 [Sus scrofa]	XP_020931757.1
Chr15_3734521_3737333	Pig.04234	0.0940209	-3.41088	0.0467401	0.2602	yes	down	0.0816472	0.0194414	0.0800119	0.0257173	0	0	0.0603668	0.00857244	MBD5-201	methyl-CpG-binding domain protein 5 isoform X1 [Sus scrofa]	XP_020931757.1
Chr15_4198970_4212638		0.291471	-1.77857	0.0205525	0.150285	yes	down	0.0680393	0.0388829	0.0666766	0	0.0596853	0.0180793	0.0578663	0.0259215	#N/A	#N/A	#N/A
Chr15_47627270_47642540	Pig.02696	16.3674	4.03275	0.0032113	0.040669	yes	up	0.0136079	0	0	0.102869	0.162003	0.0723172	0.00453596	0.112397	SORBS2-201	sorbin and SH3 domain-containing protein 2 isoform X20 [Sus scrofa]	XP_005671789.1
Chr15_48739047_48764032	Pig.02683	0.165625	-2.594	0.0440271	0.252853	yes	down	0.0952551	0.0259219	0.0466736	0.0171449	0.0255794	0	0.0559502	0.0142414	TACC1	transforming acidic coiled-coil-containing protein 1 isoform X3 [Sus scrofa]	XP_020931337.1
Chr15_49079022_49080493	Pig.02682,MSTRG.36454	0.113434	-3.14008	0.0155834	0.126933	yes	down	0.0204118	0.0324024	0.0400059	0.0171449	0	0	0.03094	0.00571496	#N/A	#N/A	#N/A
Chr15_53288260_53327464		0.0655307	-3.93169	0.0248548	0.171365	yes	down	0.0136079	0	0.0400059	0	0	0	0.0178713	0	#N/A	#N/A	#N/A
Chr15_55229766_55237802		6.72326	2.74916	0.002796	0.0369602	yes	up	0	0.012961	0.020003	0.137159	0.127897	0.0903966	0.010988	0.118484	#N/A	#N/A	#N/A
Chr15_55572130_55584996	Pig.02646	12.4619	3.63945	0.0260993	0.176756	yes	up	0	0	0.0133353	0.0942968	0.0767383	0.0723172	0.0044451	0.0811175	GSR-201	glutathione reductase, mitochondrial [Sus scrofa]	XP_003483683.2
Chr15_55572130_55590845	Pig.02646	3.2323	1.69256	0.0223722	0.159512	yes	up	0.0204118	0.0518438	0.020003	0.274318	0.179056	0.0813569	0.0307529	0.178244	GSR-201	glutathione reductase, mitochondrial [Sus scrofa]	XP_003483683.2
Chr15_55576898_55590845	Pig.02646	4.29286	2.10194	0.0328102	0.207276	yes	up	0.0204118	0.0194414	0	0.111442	0.0852647	0.0903966	0.0132844	0.095701	GSR-201	glutathione reductase, mitochondrial [Sus scrofa]	XP_003483683.2
Chr15_61738719_61744682	Pig.00267	20.3848	4.34942	0.0123305	0.106505	yes	up	0	0	0	0.0514346	0.0426324	0.027119	0	0.0403953	PRPF40A-201	pre-mRNA-processing factor 40 homolog A isoform X5 [Sus scrofa]	XP_013839583.2
Chr15_61746768_61755658	Pig.00267	4.3791	2.13063	0.00490098	0.055705	yes	up	0	0.0259219	0.0333383	0.0685795	0.170529	0.171753	0.0197534	0.136954	PRPF40A-201	pre-mRNA-processing factor 40 homolog A isoform X5 [Sus scrofa]	XP_013839583.2
Chr15_66087214_66104895	Pig.00251	7.8911	2.98023	0.0102581	0.0951067	yes	up	0	0	0.020003	0.0600071	0.119371	0.0542379	0.00666766	0.0778719	ACVR1-202	PREDICTED: activin receptor type-1 isoform X1 [Pteropus alecto]	XP_023398704.1
Chr15_66087214_66141239	Pig.00251	17.2933	4.11214	0.0430634	0.249428	yes	up	0	0	0	0.0257173	0.0170529	0.0542379	0	0.0323361	ACVR1-202	PREDICTED: activin receptor type-1 isoform X1 [Pteropus alecto]	XP_023398704.1
Chr15_66099298_66122813	Pig.00251	3.9359	1.97669	0.00103938	0.0171639	yes	up	0.0204118	0.0194414	0.0466736	0.205739	0.136424	0.180793	0.0288423	0.174318	ACVR1-202	PREDICTED: activin receptor type-1 isoform X1 [Pteropus alecto]	XP_023398704.1
Chr15_66099298_66141239	Pig.00251	42.0514	5.39408	0.000152441	0.00379913	yes	up	0	0	0	0.0857244	0.119371	0.0451983	0	0.0834311	ACVR1-202	PREDICTED: activin receptor type-1 isoform X1 [Pteropus alecto]	XP_023398704.1
Chr15_67309404_67355080	Pig.00246	7.12313	2.83251	0.00592425	0.063862	yes	up	0.0136079	0	0.0133353	0.128587	0.0852647	0.0723172	0.00898106	0.0953895	TANC1-202	protein TANC1 isoform X1 [Sus scrofa]	XP_020930418.1
Chr15_6770057_6775241		0.0111424	-6.48779	0.000751576	0.0133549	yes	down	0.0340197	0.0194414	0.266706	0	0	0	0.106722	0	#N/A	#N/A	#N/A
Chr15_72574920_72578797	MSTRG.36725	28.2798	4.8217	0.00213576	0.0295257	yes	up	0.0340197	0	0	0.437194	0.622433	0.325428	0.0113399	0.461685	0	0	XP_008972652.2
Chr15_72574920_72611569	MSTRG.36725	19.1006	4.25555	0.00016892	0.0041906	yes	up	0.0204118	0	0	0.154304	0.187582	0.225991	0.00680393	0.189293	0	0	XP_008972652.2
Chr15_76012998_76035026	Pig.00205	0.0280851	-5.15405	0.00823767	0.0821197	yes	down	0.0272157	0.0324024	0.0466736	0	0	0	0.0354306	0	STK39-201	STE20/SPS1-related proline-alanine-rich protein kinase [Sus scrofa]	XP_003133502.3
Chr15_77541444_77565361	Pig.00190	0.0230968	-5.43616	0.00832075	0.0827961	yes	down	0	0.0648048	0.0466736	0	0	0	0.0371595	0	UBR3-203	LOW QUALITY PROTEIN: E3 ubiquitin-protein ligase UBR3 [Sus scrofa]	XP_020932162.1
Chr15_7854591_7857607		0.241774	-2.04827	0.0278612	0.183701	yes	down	0.0340197	0.0324024	0.0800119	0	0.0170529	0.0361586	0.0488113	0.0177372	#N/A	#N/A	#N/A
Chr15_78557752_78637426	Pig.00183	31.4645	4.97565	3.1548e-05	0.000996514	yes	up	0	0	0.0133353	0.128587	0.332532	0.171753	0.0044451	0.210958	TLK1-201	serine/threonine-protein kinase tousled-like 1 isoform X1 [Sus scrofa]	XP_001927925.1
Chr15_78573219_78637426	Pig.00183	16.3608	4.03217	2.72255e-08	2.95832e-06	yes	up	0.0408236	0.012961	0	0.437194	0.503062	0.424864	0.0179282	0.45504	TLK1-201	serine/threonine-protein kinase tousled-like 1 isoform X1 [Sus scrofa]	XP_001927925.1
Chr15_78604943_78637426	Pig.00183	2.0987	1.0695	0.00211877	0.0294406	yes	up	0.347001	0.174973	0.240036	0.900106	0.827068	0.759331	0.254003	0.828835	TLK1-201	serine/threonine-protein kinase tousled-like 1 isoform X1 [Sus scrofa]	XP_001927925.1
Chr15_81891325_81892099	Pig.00161	0.0262404	-5.25206	0.0023003	0.0313222	yes	down	0.0340197	0.0259219	0.0600089	0	0	0	0.0399835	0	WIPF1	WAS/WASL-interacting protein family member 1 [Sus scrofa]	XP_013846045.2
Chr15_83145588_83164711		0.0533787	-4.22759	0.0468966	0.260521	yes	down	0.0272157	0	0.0400059	0	0	0	0.0224072	0	#N/A	#N/A	#N/A
Chr15_87943562_87949059		0.0291839	-5.09869	0.00343532	0.0427096	yes	down	0.0476275	0.012961	0.0533413	0	0	0	0.0379766	0	#N/A	#N/A	#N/A
Chr15_88804975_88805439	Pig.00119	67.0154	6.06642	1.61179e-05	0.000579925	yes	up	0	0	0	0.102869	0.170529	0.117516	0	0.130305	ITPRID2-202	sperm-specific antigen 2 isoform X1 [Sus scrofa]	XP_020931795.1
Chr15_95030211_95032207	MSTRG.37007,Pig.00100	0.00679525	-7.20126	0.000289594	0.00636989	yes	down	0.149687	0.168492	0.0866795	0	0	0	0.134953	0	#N/A	#N/A	#N/A
Chr16_15371403_15432891	Pig.04581	0.0147663	-6.08155	0.0019214	0.0275419	yes	down	0.15649	0	0.0866795	0	0	0	0.0810567	0	EBF1-201	transcription factor COE1 [Bos taurus]	NP_001179845.1
Chr16_35775308_35787304	Pig.01140	25.5362	4.67447	0.00307791	0.0393465	yes	up	0	0	0	0.0514346	0.0426324	0.0542379	0	0.049435	ERBIN-201	erbin isoform X1 [Sus scrofa]	XP_020932447.1
Chr16_40041687_40063130	Pig.01158	5.15079	2.36479	0.000494339	0.00952391	yes	up	0.0272157	0	0.0933472	0.188594	0.281374	0.379666	0.0401876	0.283211	ZSWIM5-201	zinc finger SWIM domain-containing protein 6 [Sus scrofa]	XP_020932632.1
Chr16_43988195_43991098	Pig.01172	8.68241	3.1181	0.00930839	0.0885683	yes	up	0.0136079	0	0.0133353	0.0685795	0.179056	0.0903966	0.00898106	0.112677	GPBP1-202	vasculin isoform X1 [Sus scrofa]	XP_005672522.1
Chr16_43988195_43999957		3.76496	1.91263	0.0352197	0.216949	yes	up	0.0340197	0.0194414	0.0333383	0.145731	0.298427	0.0723172	0.0289331	0.172158	#N/A	#N/A	#N/A
Chr16_45446435_45470707	Pig.01182	0.29703	-1.75132	0.0177204	0.137043	yes	down	0.15649	0.0324024	0.0800119	0.0857244	0.0170529	0.0180793	0.0896349	0.0402856	SLC38A9-201	sodium-coupled neutral amino acid transporter 9 isoform X1 [Sus scrofa]	XP_003134026.2
Chr16_45610455_45636435	Pig.01183,MSTRG.38422	0.33	-1.59946	0.0131345	0.111651	yes	down	0.0952551	0.0907267	0.0866795	0.0685795	0.0426324	0.0361586	0.0908871	0.0491235	#N/A	#N/A	#N/A
Chr16_49843472_49865201	Pig.01206	28.0781	4.81137	0.0190053	0.143013	yes	up	0	0	0	0.0514346	0.0682118	0.0451983	0	0.0549482	PARP8-203	poly [ADP-ribose]	XP_020932405.1
Chr16_53671468_53694230	Pig.01244,MSTRG.38604	0.0032948	-8.24559	1.51876e-09	2.66175e-07	yes	down	0.38102	0.162012	0.440065	0	0	0	0.327699	0	#N/A	#N/A	#N/A
Chr16_53671468_53741947	Pig.01244,MSTRG.38604	0.00552695	-7.4993	9.27211e-07	5.53844e-05	yes	down	0.163294	0.110168	0.306712	0	0	0	0.193392	0	#N/A	#N/A	#N/A
Chr16_53729322_53741947	Pig.01244,MSTRG.38604	0.00869498	-6.8456	9.67247e-08	8.63582e-06	yes	down	0.0884511	0.0712853	0.206697	0	0	0	0.122145	0	#N/A	#N/A	#N/A
Chr16_53729322_53776448	Pig.01244,MSTRG.38604	0.0371663	-4.74986	0.00956397	0.0905245	yes	down	0.0204118	0.0259219	0.0333383	0	0	0	0.0265573	0	#N/A	#N/A	#N/A
Chr16_53729322_53794721	MSTRG.38604	0.0195884	-5.67386	0.0339109	0.210799	yes	down	0.0204118	0.0388829	0.100015	0	0	0	0.0531032	0	0	0	NP_999103.1
Chr16_55719838_55728887		0.0232197	-5.42851	0.00323838	0.0409166	yes	down	0.0612354	0.0388829	0.0266706	0	0	0	0.042263	0	#N/A	#N/A	#N/A
Chr16_56704855_56725231	Pig.01262	0.0489937	-4.35126	0.0213159	0.154412	yes	down	0.0272157	0.0194414	0.0133353	0	0	0	0.0199975	0	EGFLAM-201	PREDICTED: pikachurin isoform X2 [Vicugna pacos]	XP_006207734.1
Chr16_58703341_58706692	Pig.16455	7.05584	2.81882	2.05823e-06	0.000110716	yes	up	0.0544315	0	0.0133353	0.308608	0.230215	0.180793	0.0225889	0.239872	Nadk2	NAD kinase 2, mitochondrial isoform X1 [Sus scrofa]	XP_003359802.2
Chr16_58703341_58719462	Pig.16455	35.1053	5.13362	4.77392e-06	0.000209167	yes	up	0	0	0.0133353	0.300035	0.281374	0.144634	0.0044451	0.242015	Nadk2	NAD kinase 2, mitochondrial isoform X1 [Sus scrofa]	XP_003359802.2
Chr16_58703341_58724322	Pig.16455	10.9154	3.4483	0.000379928	0.00775995	yes	up	0.0272157	0	0	0.188594	0.170529	0.0903966	0.00907191	0.14984	Nadk2	NAD kinase 2, mitochondrial isoform X1 [Sus scrofa]	XP_003359802.2
Chr16_60541346_60541707	MSTRG.38732	0.00489879	-7.67336	2.8313e-09	4.66135e-07	yes	down	0.251746	0.0842462	0.34005	0	0	0	0.225347	0	0	0	XP_020932639.1
Chr16_6314192_6328803	Pig.22500	0.0285605	-5.12983	0.0189209	0.142774	yes	down	0.0204118	0.0388829	0.0400059	0	0	0	0.0331002	0	SLC12A7-201	solute carrier family 12 member 7 isoform X1 [Sus scrofa]	XP_020932792.1
Chr16_6840714_6840849		2.98075	1.57568	0.0393978	0.233677	yes	up	0.0544315	0.0194414	0.0266706	0.214311	0.196109	0.0632776	0.0335145	0.157899	#N/A	#N/A	#N/A
Chr16_6840714_6845508		3.01634	1.5928	0.000323468	0.00678533	yes	up	0.721217	0.53788	1.20018	5.48636	3.8966	2.28703	0.819758	3.89	#N/A	#N/A	#N/A
Chr16_6845373_6845508		2.99251	1.58136	0.000441658	0.00869394	yes	up	0.442256	0.356426	0.800119	3.50613	2.31067	1.68138	0.532934	2.49939	#N/A	#N/A	#N/A
Chr16_76787881_76797163	Pig.13230	17.988	4.16896	0.0292281	0.190966	yes	up	0	0	0	0.0342898	0.0341059	0.0361586	0	0.0348514	TRIO-201	triple functional domain protein isoform X3 [Sus scrofa]	XP_020932800.1
Chr16_7712350_7714095	Pig.12550	14.6155	3.86943	0.0247478	0.170845	yes	up	0	0	0	0.0257173	0.0426324	0.0180793	0	0.0288097	MARCH6-201	PREDICTED: E3 ubiquitin-protein ligase MARCH6 isoform X4 [Homo sapiens]	XP_020932182.1
Chr16_8417724_8421877	Pig.12537	0.021455	-5.54254	0.0198647	0.147061	yes	down	0.0748433	0.0194414	0.0600089	0	0	0	0.0514312	0	SPARC-203	SPARC precursor [Sus scrofa]	NP_001026964.1
Chr17_12099933_12151084	Pig.13480	77.4271	6.27477	7.7478e-06	0.000321327	yes	up	0	0	0	0.162876	0.14495	0.144634	0	0.15082	PSD3-201	PREDICTED: PH and SEC7 domain-containing protein 3 isoform X3 [Ovis aries musimon]	XP_020933648.1
Chr17_12219923_12224684	Pig.13480	6.94298	2.79555	1.38188e-07	1.17309e-05	yes	up	0.0476275	0.0648048	0.0266706	0.454339	0.562747	0.569498	0.0463677	0.528862	PSD3-201	PREDICTED: PH and SEC7 domain-containing protein 3 isoform X3 [Ovis aries musimon]	XP_020933648.1
Chr17_12219923_12243444	Pig.13480	6.19145	2.63028	5.14624e-09	7.55663e-07	yes	up	0.102059	0.142571	0.0733442	1.15728	1.13402	1.03956	0.105991	1.11029	PSD3-201	PREDICTED: PH and SEC7 domain-containing protein 3 isoform X3 [Ovis aries musimon]	XP_020933648.1
Chr17_12953690_12957546	Pig.13489	17.7756	4.15183	0.041704	0.244157	yes	up	0	0	0	0.077152	0.0341059	0	0	0.037086	CRLS1-201	LOW QUALITY PROTEIN: cardiolipin synthase (CMP-forming) [Sus scrofa]	XP_003134291.4
Chr17_27497785_27500088		136.953	7.09753	5.96358e-06	0.000255119	yes	up	0	0	0	0.291463	0.255794	0.25311	0	0.266789	#N/A	#N/A	#N/A
Chr17_29680667_29696063	Pig.09491	24.6031	4.62077	0.00330778	0.0415999	yes	up	0	0	0	0.0600071	0.0596853	0.027119	0	0.0489371	ATRN-201	attractin isoform X1 [Sus scrofa]	XP_001927324.7
Chr17_34930916_34945628	Pig.11892	0.298803	-1.74273	0.00892798	0.0857244	yes	down	0.0748433	0.0842462	0.0333383	0.0171449	0.0426324	0.0361586	0.0641426	0.0319786	CBFA2T2-201	protein CBFA2T2 isoform X1 [Sus scrofa]	XP_020933765.1
Chr17_34930916_34955208	Pig.11892	0.0427372	-4.54836	0.0176479	0.137043	yes	down	0.0476275	0.012961	0.0133353	0	0	0	0.0246413	0	CBFA2T2-201	protein CBFA2T2 isoform X1 [Sus scrofa]	XP_020933765.1
Chr17_36957879_36963159		0.310243	-1.68853	0.00892892	0.0857244	yes	down	0.122471	0.0972072	0.106683	0.0257173	0.0426324	0.0903966	0.108787	0.0529154	#N/A	#N/A	#N/A
Chr17_37021695_37024414	MSTRG.39480,Pig.07366,MSTRG.39478	0.0416813	-4.58446	0.00678486	0.0708887	yes	down	0.0136079	0.0324024	0.020003	0	0	0	0.0220044	0	#N/A	#N/A	#N/A
Chr17_38217527_38223327	Pig.07383	0.0298464	-5.0663	0.0150933	0.124057	yes	down	0.0340197	0.0388829	0.020003	0	0	0	0.0309685	0	RBL1-201	retinoblastoma-like protein 1 isoform X2 [Sus scrofa]	XP_020933003.1
Chr17_39518236_39545843	Pig.07402	0.0514075	-4.28188	0.0349151	0.215806	yes	down	0.0340197	0.012961	0.0133353	0	0	0	0.0201053	0	RALGAPB-201	PREDICTED: ral GTPase-activating protein subunit beta isoform X1 [Ceratotherium simum simum]	XP_020933792.1
Chr17_4265658_4269739	Pig.08648	33.7367	5.07625	0.00670089	0.0701463	yes	up	0	0	0	0.0428622	0.0682118	0.0813569	0	0.0641436	SLC7A2-201	cationic amino acid transporter 2 isoform X1 [Sus scrofa]	XP_020932806.1
Chr17_4560664_4563512	Pig.08645	57.4783	5.84495	4.56103e-05	0.00137667	yes	up	0	0	0	0.0942968	0.110844	0.126555	0	0.110565	FGL1-201	fibrinogen-like protein 1 [Sus scrofa]	XP_020933611.1
Chr17_47381327_47383871	Pig.14975	0.157763	-2.66417	1.66483e-06	9.32475e-05	yes	down	0.210922	0.220336	0.293377	0.0685795	0.0426324	0.0723172	0.241545	0.0611764	ZMYND8-204	LOW QUALITY PROTEIN: protein kinase C-binding protein 1 [Sus scrofa]	XP_020933698.1
Chr17_49081289_49083160	Pig.14984	0.145147	-2.78441	1.3876e-05	0.000512847	yes	down	0.204118	0.103688	0.153356	0.0685795	0	0.0361586	0.153721	0.0349127	ZNFX1-201	NFX1-type zinc finger-containing protein 1 [Sus scrofa]	XP_020933177.1
Chr17_49185401_49188054		0.0306946	-5.02587	0.00104738	0.0172436	yes	down	0.0340197	0.0259219	0.0400059	0	0	0	0.0333158	0	#N/A	#N/A	#N/A
Chr17_51145666_51155075	Pig.09983	0.0859547	-3.54028	0.0468648	0.260521	yes	down	0.0136079	0	0.0266706	0	0	0	0.0134262	0	ATP9A-210	probable phospholipid-transporting ATPase IIA [Sus scrofa]	NP_001108144.1
Chr17_52517980_52520929	Pig.09995	0.113738	-3.13621	0.00500013	0.0565952	yes	down	0.0612354	0.12961	0.100015	0	0	0.0542379	0.0969533	0.0180793	TSHZ1-202	teashirt homolog 2 [Sus scrofa]	NP_001108146.1
Chr17_52517980_52521056		0.165845	-2.59209	0.000235706	0.0054726	yes	down	0.170098	0.27218	0.206697	0.120014	0.0341059	0.0361586	0.216325	0.0634262	#N/A	#N/A	#N/A
Chr17_56923481_56931936		5.40924	2.43543	0.0033806	0.0423198	yes	up	0	0.012961	0.0266706	0.137159	0.110844	0.0903966	0.0132105	0.1128	#N/A	#N/A	#N/A
Chr17_7571166_7574449		0.00310362	-8.33183	7.61206e-09	1.03391e-06	yes	down	0.278961	0.324024	0.326715	0	0	0	0.3099	0	#N/A	#N/A	#N/A
Chr17_7667722_7668807	Pig.08638	0.0352215	-4.8274	0.0325391	0.206043	yes	down	0.0544315	0.0194414	0.0133353	0	0	0	0.0290694	0	FAT2-201	FAT tumor suppressor homolog 1 [Sus scrofa]	NP_001177099.1
Chr18_10724778_10744895	Pig.17902	5.86343	2.55174	0.0419824	0.244732	yes	up	0.0136079	0	0.020003	0.0600071	0.179056	0.0451983	0.0112036	0.0947538	FMC1-LUC7L2-201	putative RNA-binding protein Luc7-like 2 isoform X2 [Sus scrofa]	XP_013846229.1
Chr18_10860901_10864575	Pig.17900	13.4791	3.75265	0.0457319	0.256795	yes	up	0	0	0	0.0257173	0.0255794	0.027119	0	0.0261386	UBN2-201	ubinuclein-2 isoform X1 [Sus scrofa]	XP_003360164.3
Chr18_11837452_11867871	MSTRG.40295	92.0185	6.52385	1.02216e-06	5.97141e-05	yes	up	0	0	0	0.180021	0.102318	0.244071	0	0.17547	0	0	XP_020934349.1
Chr18_11844787_11867871	MSTRG.40295,Pig.01268	43.4174	5.4402	0.000225843	0.0053348	yes	up	0	0	0	0.0600071	0.110844	0.0813569	0	0.0840694	#N/A	#N/A	#N/A
Chr18_11856641_11867871	MSTRG.40295,Pig.01268	468.172	8.87089	4.19565e-13	1.34088e-10	yes	up	0	0	0	0.977258	1.18518	0.614697	0	0.925712	#N/A	#N/A	#N/A
Chr18_1635118_1641276	MSTRG.40019	2.631	1.39561	1.39877e-05	0.000513483	yes	up	0.210922	0.149051	0.246703	0.745802	1.02318	0.714133	0.202225	0.827704	0	0	XP_020934929.1
Chr18_1750812_1753615	Pig.15542	10.8901	3.44495	0.0359233	0.220035	yes	up	0	0	0.0133353	0.0942968	0.0767383	0.0451983	0.0044451	0.0720778	UBE3C-204	ubiquitin-protein ligase E3C isoform X5 [Sus scrofa]	XP_005673135.2
Chr18_17967186_18000378	Pig.01297	22.0092	4.46003	0.00751055	0.0764135	yes	up	0	0	0	0.0342898	0.0170529	0.0723172	0	0.04122	MKLN1-202	PREDICTED: muskelin isoform X3 [Ovis aries]	XP_004008122.1
Chr18_18270856_18358987	MSTRG.40398	85.3537	6.41538	1.69891e-05	0.00060328	yes	up	0	0	0	0.197166	0.213162	0.0994362	0	0.169921	0	0	XP_020954391.1
Chr18_18299792_18358987	MSTRG.40398	36.2362	5.17936	0.0117209	0.103581	yes	up	0	0	0	0.0428622	0.0937912	0.0723172	0	0.0696569	0	0	XP_020954391.1
Chr18_20441281_20444735	Pig.01330	0.02551	-5.29279	0.0311299	0.199916	yes	down	0.0612354	0.0194414	0.0466736	0	0	0	0.0424501	0	FAM71F2-201	protein FAM71F2 isoform X2 [Sus scrofa]	XP_020934441.1
Chr18_25510138_25527479		5.81292	2.53926	2.04791e-07	1.56708e-05	yes	up	0.544315	0.168492	0.553415	3.32611	4.20355	3.20908	0.422074	3.57958	#N/A	#N/A	#N/A
Chr18_2781902_2791211	Pig.15536	14.8125	3.88874	0.00393721	0.0474298	yes	up	0	0	0.0133353	0.0857244	0.127897	0.0813569	0.0044451	0.0983261	Rbm33	LOW QUALITY PROTEIN: RNA-binding protein 33 [Sus scrofa]	XP_020934696.1
Chr18_2796580_2825012	Pig.15536	5.74378	2.522	0.000311891	0.00665026	yes	up	0.0612354	0	0.0133353	0.231456	0.196109	0.198872	0.0248569	0.208812	Rbm33	LOW QUALITY PROTEIN: RNA-binding protein 33 [Sus scrofa]	XP_020934696.1
Chr18_2812373_2818304	Pig.15536	9.89646	3.30691	0.000970802	0.0165861	yes	up	0.0204118	0	0	0.137159	0.136424	0.0361586	0.00680393	0.103247	Rbm33	LOW QUALITY PROTEIN: RNA-binding protein 33 [Sus scrofa]	XP_020934696.1
Chr18_2812373_2825012	Pig.15536	4.78282	2.25786	1.4341e-07	1.19869e-05	yes	up	0.0884511	0.0453634	0.0600089	0.488629	0.451903	0.488141	0.0646078	0.476225	Rbm33	LOW QUALITY PROTEIN: RNA-binding protein 33 [Sus scrofa]	XP_020934696.1
Chr18_31666003_31666275	Pig.01383	0.165252	-2.59726	8.74208e-05	0.0023969	yes	down	0.108863	0.0777657	0.180027	0.0600071	0.0341059	0	0.122218	0.031371	MDFIC-201	myoD family inhibitor domain-containing protein isoform X1 [Sus scrofa]	XP_003134810.3
Chr18_31666003_31703354	Pig.01383	0.0754706	-3.72794	7.90495e-17	7.52189e-14	yes	down	0.530707	0.2657	0.566751	0.0428622	0.0596853	0.0542379	0.454386	0.0522618	MDFIC-201	myoD family inhibitor domain-containing protein isoform X1 [Sus scrofa]	XP_003134810.3
Chr18_34270406_34280336	MSTRG.40641,Pig.01392	3.32533	1.7335	0.00102567	0.0171033	yes	up	0.0476275	0.0194414	0.11335	0.265746	0.417797	0.207912	0.0601397	0.297152	#N/A	#N/A	#N/A
Chr18_38971782_38985420	Pig.07046	0.144852	-2.78735	0.00191061	0.0275419	yes	down	0.0476275	0.0194414	0.100015	0	0	0.0361586	0.0556946	0.0120529	HERPUD2-202	PREDICTED: homocysteine-responsive endoplasmic reticulum-resident ubiquitin-like domain member 2 protein [Canis lupus familiaris]	XP_020934290.1
Chr18_38974154_38985420	Pig.07046	0.395541	-1.3381	0.0434776	0.251024	yes	down	0.102059	0.0453634	0.0666766	0.0514346	0.0341059	0.0451983	0.0713663	0.0435796	HERPUD2-202	PREDICTED: homocysteine-responsive endoplasmic reticulum-resident ubiquitin-like domain member 2 protein [Canis lupus familiaris]	XP_020934290.1
Chr18_39482693_39491259	Pig.07049	36.3817	5.18514	0.000784837	0.0138442	yes	up	0	0	0	0.120014	0.0426324	0.0542379	0	0.0722948	DPY19L2-201	probable C-mannosyltransferase DPY19L1 [Sus scrofa]	XP_020934968.1
Chr18_43306041_43341966		53.106	5.7308	0.00019797	0.00477718	yes	up	0	0	0	0.077152	0.110844	0.117516	0	0.101837	#N/A	#N/A	#N/A
Chr18_44072031_44078588	Pig.07088	37.5204	5.2296	0.00119576	0.0188854	yes	up	0	0	0	0.0857244	0.14495	0	0	0.0768915	CHN2	beta-chimaerin isoform X3 [Sus scrofa]	XP_003484098.1
Chr18_45729590_45744165	Pig.07095	3.71357	1.89281	9.92929e-08	8.70094e-06	yes	up	0.197314	0.220336	0.180027	1.16585	1.52624	0.976283	0.199226	1.22279	HIBADH-202	3-hydroxyisobutyrate dehydrogenase, mitochondrial [Sus scrofa]	XP_020934876.1
Chr18_45729590_45754366	Pig.07095	26.8894	4.74897	2.94771e-17	4.00373e-14	yes	up	0	0.0259219	0.0333383	0.942968	0.767383	0.804529	0.0197534	0.838293	HIBADH-202	3-hydroxyisobutyrate dehydrogenase, mitochondrial [Sus scrofa]	XP_020934876.1
Chr18_45729590_45763157	Pig.07095	35.8723	5.1648	0.0034314	0.0427096	yes	up	0	0	0	0.0942968	0.0852647	0.0361586	0	0.0719067	HIBADH-202	3-hydroxyisobutyrate dehydrogenase, mitochondrial [Sus scrofa]	XP_020934876.1
Chr18_45741454_45754366	Pig.07095	20.8204	4.37992	0.0393148	0.233439	yes	up	0	0	0	0.0428622	0.0852647	0	0	0.042709	HIBADH-202	3-hydroxyisobutyrate dehydrogenase, mitochondrial [Sus scrofa]	XP_020934876.1
Chr18_48365250_48392464		9.08545	3.18356	0.0285899	0.187684	yes	up	0.0136079	0	0	0.077152	0.0852647	0.027119	0.00453596	0.0631786	#N/A	#N/A	#N/A
Chr18_49965466_49966837	Pig.15666	2.76444	1.46699	0.00528938	0.0590086	yes	up	0.0680393	0.0777657	0.0800119	0.282891	0.426324	0.298309	0.0752723	0.335841	TNS3-201	tensin-3 isoform X4 [Sus scrofa]	XP_020935014.1
Chr18_5052801_5065237	Pig.13671	30.271	4.91987	0.00297729	0.0386977	yes	up	0	0	0	0.0942968	0.0511588	0.0361586	0	0.0605381	ACTR3B	actin-related protein 3B isoform X8 [Sus scrofa]	XP_020934961.1
Chr18_53579890_53620130		0.0182972	-5.77223	0.0203936	0.149526	yes	down	0.0544315	0.0518438	0.0533413	0	0	0	0.0532055	0	#N/A	#N/A	#N/A
Chr18_53610429_53620130	Pig.15553	0.0167182	-5.90243	1.56918e-07	1.27244e-05	yes	down	0.217726	0.200895	0.233368	0	0	0.0180793	0.21733	0.00602644	GLI3-201	transcriptional activator GLI3 isoform X2 [Sus scrofa]	XP_020934602.1
Chr18_55254219_55264445	Pig.17674	2.30871	1.20708	0.00719868	0.0742133	yes	up	0.108863	0.174973	0.293377	0.925824	0.937912	0.325428	0.192404	0.729721	SUGCT-201	succinate--hydroxymethylglutarate CoA-transferase [Sus scrofa]	XP_020934311.1
Chr18_5599235_5600944	Pig.13668	0.293266	-1.76972	0.00874576	0.0846983	yes	down	0.122471	0.0777657	0.106683	0.0514346	0.0255794	0.0632776	0.102306	0.0467639	KMT2C-201	histone-lysine N-methyltransferase 2C isoform X1 [Sus scrofa]	XP_020934780.1
ChrX_110843981_110863166	Pig.04472	55.4003	5.79182	0.000133201	0.00342977	yes	up	0	0	0	0.102869	0.110844	0.108476	0	0.107396	MBNL3-201	muscleblind-like protein 3 isoform X1 [Sus scrofa]	XP_013841883.1
ChrX_112727741_112741438	Pig.04480	7.47406	2.90189	0.000182245	0.00446007	yes	up	0.0544315	0	0.0133353	0.214311	0.409271	0.126555	0.0225889	0.250046	HPRT1-201	hypoxanthine-guanine phosphoribosyltransferase isoform X1 [Sus scrofa]	XP_020935162.1
ChrX_114395060_114411461	Pig.08383	0.0485253	-4.36512	0.0178083	0.137043	yes	down	0.0204118	0	0.0533413	0	0	0	0.0245844	0	ARHGEF6-201	rho guanine nucleotide exchange factor 6 isoform X8 [Sus scrofa]	XP_020936217.1
ChrX_11445105_11457569	Pig.06016	0.0216243	-5.5312	5.30519e-05	0.00154134	yes	down	0.0612354	0.0259219	0.0600089	0	0	0	0.0490554	0	WWC3-201	protein WWC3 [Sus scrofa]	XP_013841331.2
ChrX_123480676_123481521	Pig.18741	0.0340184	-4.87754	0.00225084	0.0309591	yes	down	0.0748433	0.116649	0.100015	0	0.0170529	0	0.0971689	0.00568432	AFF2-201	AF4/FMR2 family member 2 isoform X3 [Sus scrofa]	XP_013839468.1
ChrX_24791587_24795340		2.59866	1.37777	8.64465e-05	0.00238408	yes	up	0.108863	0.0777657	0.120018	0.540064	0.383691	0.325428	0.102216	0.416394	#N/A	#N/A	#N/A
ChrX_32827680_32872783	Pig.01823	0.0186294	-5.74628	0.000419816	0.00838793	yes	down	0.108863	0.012961	0.0600089	0	0	0	0.0606109	0	DMD-205	dystrophin isoform X1 [Sus scrofa]	XP_020935207.1
ChrX_32984351_33033861	Pig.01823	0.0323738	-4.94903	0.00796694	0.0798392	yes	down	0.0340197	0.0259219	0.0333383	0	0	0	0.0310933	0	DMD-205	dystrophin isoform X1 [Sus scrofa]	XP_020935207.1
ChrX_45213981_45219005	MSTRG.41530	54.8107	5.77639	0.000400593	0.0081514	yes	up	0	0	0	0.180021	0.0341059	0.108476	0	0.107534	0	0	XP_020922221.1
ChrX_45869988_45872448	Pig.09871	12.2667	3.61668	0.0463129	0.259469	yes	up	0	0	0	0.0342898	0	0.0361586	0	0.0234828	SLC9A7-201	sodium/hydrogen exchanger 7 isoform X1 [Sus scrofa]	XP_020936046.1
ChrX_52315117_52332491	Pig.11763	0.0271923	-5.20066	0.00837222	0.0829336	yes	down	0.0408236	0	0.0933472	0	0	0	0.0447236	0	Arhgef9	rho guanine nucleotide exchange factor 9 isoform X1 [Sus scrofa]	XP_020936292.1
ChrX_56197879_56199968	Pig.11779	0.0797987	-3.64749	0.0232871	0.164667	yes	down	0.0408236	0.0194414	0.0866795	0	0.0170529	0	0.0489815	0.00568432	OPHN1-201	oligophrenin-1 isoform X1 [Sus scrofa]	XP_020935958.1
ChrX_56197879_56204724	Pig.11779	0.0951717	-3.39332	0.00797951	0.0798392	yes	down	0.0408236	0.0324024	0.0466736	0	0	0.0180793	0.0399665	0.00602644	OPHN1-201	oligophrenin-1 isoform X1 [Sus scrofa]	XP_020935958.1
ChrX_63430042_63437243	Pig.10458	15.9799	3.99818	0.0177716	0.137043	yes	up	0	0	0	0.0342898	0.0426324	0.0180793	0	0.0316671	ATRX-201	transcriptional regulator ATRX isoform X1 [Sus scrofa]	XP_020935739.1
ChrX_69088121_69130214	Pig.06669	18.9078	4.24091	0.00102845	0.0171033	yes	up	0	0.012961	0	0.111442	0.221688	0.0994362	0.00432032	0.144189	RPS6KA6-201	ribosomal protein S6 kinase alpha-6 isoform X1 [Sus scrofa]	XP_005657901.1
ChrX_80917111_80924096	Pig.02331	0.159597	-2.6475	0.0439475	0.252663	yes	down	0.0884511	0.0194414	0.106683	0	0	0.0451983	0.071525	0.0150661	DIAPH2-203	protein diaphanous homolog 2 isoform X4 [Sus scrofa]	XP_020936138.1
ChrX_85946567_85954427		0.0161197	-5.95503	0.00732761	0.075115	yes	down	0.0680393	0.0518438	0.0666766	0	0	0	0.0621866	0	#N/A	#N/A	#N/A
ChrX_94780501_94789821	Pig.02450,MSTRG.42159	0.0986502	-3.34153	0.00737803	0.0753475	yes	down	0.0340197	0.0388829	0.0333383	0.0171449	0	0	0.0354136	0.00571496	#N/A	#N/A	#N/A
Scaffold1086_19219_26311	Pig.21958	0.209249	-2.2567	0.0452473	0.256072	yes	down	0.0612354	0.0648048	0.0666766	0.0257173	0.0426324	0	0.0642389	0.0227832	ZMYM2-201	zinc finger MYM-type protein 2 isoform X1 [Sus scrofa]	XP_020921085.1
Scaffold117_1213266_1228785	Pig.10777	0.0800281	-3.64335	0.00102941	0.0171033	yes	down	0.0884511	0.0583243	0.0533413	0	0.0255794	0	0.0667056	0.00852647	RBMS3-201	RNA-binding motif, single-stranded-interacting protein 3 isoform X2 [Sus scrofa]	XP_020925630.1
Scaffold118_4243406_4254246	Pig.10811	0.0385615	-4.69669	0.0371767	0.224673	yes	down	0.0272157	0.0194414	0.0333383	0	0	0	0.0266652	0	VIRMA-202	protein virilizer homolog isoform X1 [Sus scrofa]	XP_020944755.1
Scaffold124_4861467_4864153	Pig.11265	0.0648904	-3.94585	0.0330457	0.207806	yes	down	0.0272157	0	0.0266706	0	0	0	0.0179621	0	RUFY2-202	LOW QUALITY PROTEIN: RUN and FYVE domain-containing protein 2 [Sus scrofa]	XP_020929180.1
Scaffold124_5105139_5107452	Pig.11268	0.0219944	-5.50672	0.000644654	0.0118726	yes	down	0.0204118	0.0583243	0.0466736	0	0	0	0.0418032	0	TET1-201	methylcytosine dioxygenase TET1 [Sus scrofa]	NP_001302701.1
Scaffold124_5105139_5113215	Pig.11268	0.10005	-3.32121	0.00411859	0.0490709	yes	down	0.0884511	0.0388829	0.0333383	0.0257173	0	0	0.0535574	0.00857244	TET1-201	methylcytosine dioxygenase TET1 [Sus scrofa]	NP_001302701.1
Scaffold1549_13083_15446		0.0112444	-6.47466	1.03214e-05	0.000412327	yes	down	0.0408236	0.123129	0.0733442	0	0	0	0.079099	0	#N/A	#N/A	#N/A
Scaffold155_4805140_4828350	Pig.12801	28.7003	4.843	0.0212687	0.154276	yes	up	0	0	0	0.0600071	0.0426324	0.0632776	0	0.0553057	ITGA9-201	integrin alpha-9 isoform X2 [Sus scrofa]	XP_020927318.1
Scaffold155_4811844_4813386	Pig.12801	26.2228	4.71275	0.00554255	0.060583	yes	up	0	0	0	0.0685795	0.0511588	0.0361586	0	0.0519657	ITGA9-201	integrin alpha-9 isoform X2 [Sus scrofa]	XP_020927318.1
Scaffold155_4811844_4828350	Pig.12801	752.432	9.55542	1.9257e-14	1.04623e-11	yes	up	0	0	0	1.38016	2.11457	0.967243	0	1.48732	ITGA9-201	integrin alpha-9 isoform X2 [Sus scrofa]	XP_020927318.1
Scaffold155_4811844_4846127	Pig.12801	29.6831	4.89157	0.00325309	0.041007	yes	up	0	0	0	0.0685795	0.0511588	0.0542379	0	0.0579921	ITGA9-201	integrin alpha-9 isoform X2 [Sus scrofa]	XP_020927318.1
Scaffold155_4811844_4891253	Pig.12801	44.9297	5.4896	0.000690233	0.012584	yes	up	0	0	0	0.0942968	0.0767383	0.0903966	0	0.0871439	ITGA9-201	integrin alpha-9 isoform X2 [Sus scrofa]	XP_020927318.1
Scaffold155_4854966_4891253	Pig.12801	23.0196	4.52479	0.0498325	0.270253	yes	up	0	0	0	0.0685795	0.0426324	0.027119	0	0.0461103	ITGA9-201	integrin alpha-9 isoform X2 [Sus scrofa]	XP_020927318.1
Scaffold155_4873178_4891253	Pig.12801	26.156	4.70907	0.00161505	0.02404	yes	up	0	0	0	0.0857244	0.0341059	0.0361586	0	0.0519963	ITGA9-201	integrin alpha-9 isoform X2 [Sus scrofa]	XP_020927318.1
Scaffold158_4279284_4282928	Pig.12978	162.438	7.34375	2.15835e-08	2.49496e-06	yes	up	0	0	0	0.274318	0.426324	0.25311	0	0.317917	C5-203	complement C5a anaphylatoxin precursor [Sus scrofa]	NP_001001646.1
Scaffold158_4338278_4344658	Pig.12978	51.5716	5.68851	0.0129436	0.111076	yes	up	0	0	0	0.0600071	0.170529	0.0723172	0	0.100951	C5-203	complement C5a anaphylatoxin precursor [Sus scrofa]	NP_001001646.1
Scaffold1727_15283_27013	Pig.22643	0.17964	-2.47682	0.00447379	0.0525807	yes	down	0.0884511	0.0777657	0.100015	0.0600071	0	0.0180793	0.0887439	0.0260288	LDB2-201	LIM domain-binding protein 2 [Odocoileus virginianus texanus]	NP_001099479.1
Scaffold180_2562774_2568653	Pig.13867	8.30394	3.0538	0.000432015	0.00853505	yes	up	0	0.012961	0.020003	0.145731	0.162003	0.126555	0.010988	0.144763	PFKFB1-201	6-phosphofructo-2-kinase/fructose-2,6-bisphosphatase 1 isoform X2 [Sus scrofa]	XP_005673720.1
Scaffold180_2562774_2570664	Pig.13867	9.91757	3.30999	5.32462e-20	9.64288e-17	yes	up	0.149687	0.12961	0.260039	3.57471	2.79668	2.03392	0.179778	2.80177	PFKFB1-201	6-phosphofructo-2-kinase/fructose-2,6-bisphosphatase 1 isoform X2 [Sus scrofa]	XP_005673720.1
Scaffold249_2002906_2003964		14.3911	3.8471	4.59168e-05	0.00137827	yes	up	0	0.0259219	0	0.308608	0.306953	0.0723172	0.00864064	0.229293	#N/A	#N/A	#N/A
Scaffold249_295163_295708	Pig.16592	0.278036	-1.84666	0.000303557	0.00657061	yes	down	0.183706	0.13609	0.2267	0.171449	0.0255794	0.0451983	0.182166	0.0807422	IGF1R-201	insulin-like growth factor 1 receptor isoform X1 [Sus scrofa]	XP_020938574.1
Scaffold267_2060064_2061371	Pig.17347,MSTRG.43903	98.611	6.62368	8.04105e-07	5.0215e-05	yes	up	0	0	0	0.231456	0.14495	0.198872	0	0.191759	#N/A	#N/A	#N/A
Scaffold288_845822_855512	Pig.17809	4.42743	2.14647	2.55614e-05	0.000841669	yes	up	0.0680393	0.0194414	0.0466736	0.42005	0.366638	0.135595	0.0447181	0.307428	LAPTM4B-202	lysosomal-associated transmembrane protein 4B [Sus scrofa]	XP_005655413.3
Scaffold288_850448_855512	Pig.17809	6.58124	2.71836	1.98602e-07	1.54144e-05	yes	up	0.0476275	0.0194414	0.0333383	0.265746	0.477483	0.27119	0.0334691	0.338139	LAPTM4B-202	lysosomal-associated transmembrane protein 4B [Sus scrofa]	XP_005655413.3
Scaffold288_854949_855512	Pig.17809	23.0524	4.52684	0.00517079	0.0579235	yes	up	0	0	0	0.077152	0.0341059	0.027119	0	0.0461256	LAPTM4B-202	lysosomal-associated transmembrane protein 4B [Sus scrofa]	XP_005655413.3
Scaffold3265_5751_23150		159.136	7.31412	0.0195137	0.14523	yes	up	0	0	0	0.745802	0.264321	0	0	0.336708	#N/A	#N/A	#N/A
Scaffold355_330971_367375	Pig.19337	14.4917	3.85716	0.0290525	0.190401	yes	up	0	0	0	0.0428622	0.0255794	0.0180793	0	0.0288403	SCMH1-201	polycomb protein SCMH1 isoform X1 [Sus scrofa]	XP_020952602.1
Scaffold419_234994_255861		3.71253	1.8924	0.0115665	0.102879	yes	up	0.0544315	0.0324024	0.0266706	0.222883	0.196109	0.244071	0.0378348	0.221021	#N/A	#N/A	#N/A

## Sheet: N30D_L vs N210D_L_DEcircRNAs
circRNA id	Host gene id	FC(N210D_L/N30D_L)	Log2FC(N210D_L/N30D_L)	Pvalue	Padjust	Significant	Regulate	N30D_L1	N30D_L2	N30D_L3	N210D_L1	N210D_L2	N210D_L3	N30D_L	N210D_L	gene_name	description	nr_hit_name
Chr01_129539644_129544125	MSTRG.1761,Pig.14306	7.0663	2.82095	7.6566e-07	5.70288e-05	yes	up	0.0476275	0.0194414	0.0600089	0.489712	0.479559	0.187709	0.0423593	0.38566	#N/A	#N/A	#N/A
Chr01_130102143_130113674		15.2815	3.93371	0.0462884	0.333891	yes	up	0	0	0	0.0340078	0.0282093	0.0139044	0	0.0253738	#N/A	#N/A	#N/A
Chr01_134868579_134888642	MSTRG.1863,Pig.02307	37.121	5.21417	0.0200714	0.192537	yes	up	0	0	0	0.0952218	0.063471	0.0278088	0	0.0621672	#N/A	#N/A	#N/A
Chr01_134883950_134888642	MSTRG.1863,Pig.02307	35.0316	5.13059	0.000538002	0.0133574	yes	up	0	0	0	0.0476109	0.0916804	0.034761	0	0.0580174	#N/A	#N/A	#N/A
Chr01_134987666_135001147	Pig.02305	5.21649	2.38308	1.19492e-10	2.82897e-08	yes	up	0.129275	0.12961	0.106683	1.07465	0.909751	0.618746	0.121856	0.867714	TRPM7-201	transient receptor potential cation channel subfamily M member 7 isoform X1 [Sus scrofa]	XP_023989567.2
Chr01_134990236_135001147	Pig.02305	57.5657	5.84714	1.61656e-05	0.000770949	yes	up	0	0	0	0.122428	0.0916804	0.069522	0	0.0945435	TRPM7-201	transient receptor potential cation channel subfamily M member 7 isoform X1 [Sus scrofa]	XP_023989567.2
Chr01_136392137_136398932	Pig.02292	0.0425325	-4.55529	0.020099	0.192537	yes	down	0.0340197	0.0194414	0.0133353	0	0	0	0.0222655	0	TMOD3-201	tropomodulin-3 [Sus scrofa]	NP_999459.1
Chr01_136529850_136543063		0.202863	-2.30142	0.0339125	0.277538	yes	down	0.0816472	0.0194414	0.0600089	0.0408093	0	0	0.0536992	0.0136031	#N/A	#N/A	#N/A
Chr01_141047778_141067158		0.0437404	-4.51489	0.00473303	0.0720258	yes	down	0.0136079	0.0194414	0.0333383	0	0	0	0.0221292	0	#N/A	#N/A	#N/A
[truncated: 928 more rows]

## Sheet: N90D_L vs N150D_L_DEcircRNAs
circRNA id	Host gene id	FC(N150D_L/N90D_L)	Log2FC(N150D_L/N90D_L)	Pvalue	Padjust	Significant	Regulate	N90D_L1	N90D_L2	N90D_L3	N150D_L1	N150D_L2	N150D_L3	N90D_L	N150D_L	gene_name	description	nr_hit_name
[truncated: 234 more rows]

[truncated: 1 more sheets: N150D_L vs N210D_L_DEcircRNAs]
