# Supplementary material for: Spatiotemporal Regulation of Circular RNA Expression During Ningxiang Pig Skeletal Muscle, Subcutaneous Fat, and Liver Development
Source: Research Square preprint supplement (doi:10.21203/rs.3.rs-111082/v1), 2020-11-20
Supplement: Supplementary file 2 [file 89af15a8174d779f93cc017f.xls]

## Sheet: sheet
circRNA id	Host gene id	N150D_F1	N150D_F2	N150D_F3	N210D_F1	N210D_F2	N210D_F3	N30D_F1	N30D_F2	N30D_F3	fat
Chr01_129539644_129544125	MSTRG.1761,Pig.14306	0	0.0245815	0.0441892	0	0.0144376	0.0298884	0.195033	0.222373	0.204424	0.081659
Chr01_143206410_143210729	Pig.02254	4.03705	3.4496	4.26868	2.15731	1.61701	2.45085	0.440398	0.498423	0.27876	2.13312
Chr01_150155875_150158392	Pig.02205	0.274448	0.589956	0.813081	0.226066	0.267096	0.343716	0.138411	0.138025	0.123893	0.323855
Chr01_151532417_151542472	Pig.02203	0.0973849	0.139295	0.106054	0.0516721	0.108282	0.0523047	0	0	0	0.061666
Chr01_162166054_162169510	Pig.08979	0.717107	1.20449	1.2373	0.490885	0.526973	0.590296	0.0251656	0.0230042	0.0433627	0.539843
Chr01_176366641_176466186	Pig.00707	0.0619722	0.180264	0.309324	0.0645902	0.0288752	0.0298884	0	0	0	0.074991
Chr01_176448874_176463214	Pig.00707	0.159357	0.180264	0.176757	0.116262	0.0649693	0.104609	0	0	0	0.089135
Chr01_176448874_176466186	Pig.00707	4.58594	6.25189	6.19533	2.86135	3.299	1.53178	0	0	0	2.74725
Chr01_182096958_182103661	Pig.00734	0.0442659	0.0819383	0.106054	0.0322951	0.0505317	0.0373605	0	0.0153361	0	0.040865
Chr01_182642754_182716683	Pig.00740	0	0	0.0176757	0	0.0288752	0.0149442	0.113245	0.0536764	0.055752	0.031574
Chr01_214379127_214383038		0.053119	0.155683	0.114892	0.0710492	0.0721881	0.0523047	0.635431	0.283718	0.377875	0.201807
Chr01_214380720_214383038		0.0708254	0.122907	0.141405	0.0581312	0.0649693	0.0597768	0.836755	0.483087	0.74336	0.286802
Chr01_225853573_225876920	Pig.04001	0.115091	0.155683	0.0883784	0.0258361	0.0577505	0.0597768	0	0	0	0.055835
Chr01_225864275_225876920	Pig.04001	0.0265595	0.0901321	0.0618649	0.0516721	0.0216564	0.0224163	0	0	0	0.030478
Chr01_225868396_225876920	Pig.04001	0.0354127	0.049163	0.053027	0.0322951	0.0144376	0.0448326	0	0	0	0.025463
Chr01_239111391_239126201	Pig.05196	0.0442659	0.0327753	0.0972162	0.103344	0.0216564	0.104609	0	0	0	0.044874
Chr01_28732821_28737849		0.0265595	0.0983259	0	0.0322951	0.0144376	0.0298884	0	0	0	0.02239
Chr01_47916059_47918028	Pig.03256	0.132798	0.303172	0.415378	0.161475	0.12272	0.127026	0	0	0	0.140285
Chr01_72779231_72783251	Pig.02907	0.185917	0.319559	0.353514	0.155016	0.129939	0.0896652	0	0	0.0247787	0.139821
Chr01_74523778_74537105	Pig.02889	0.0442659	0.0327753	0	0.0322951	0.0144376	0.0523047	0	0	0	0.019564
Chr01_85074434_85093387		0.0354127	0.0245815	0.0618649	0.0322951	0.0721881	0.0373605	0	0	0	0.0293
Chr01_87757404_87763045	Pig.02840	0.0796785	0.0409691	0.106054	0.0322951	0.0649693	0	0	0	0	0.035996
Chr01_89715558_89717688	Pig.02822	0.0265595	0.155683	0.132568	0.0775082	0.0866257	0.0597768	0	0	0	0.059858
Chr02_129557508_129571492	Pig.12557	0	0	0	0	0	0	0.0125828	0.0306722	0.0433627	0.009624
Chr02_129618137_129623462	Pig.12558	0	0	0	0	0	0	0.0880795	0.0536764	0.0619467	0.022634
Chr02_13778027_13783009	Pig.14542	0.0708254	0.0409691	0.106054	0.0387541	0.0938445	0.0597768	0	0	0	0.04558
Chr02_138667128_138670999	Pig.12692	0.0708254	0.0655506	0.0353514	0.0387541	0.0505317	0.0149442	0.0817881	0.161029	0.154867	0.074849
Chr02_15132030_15165811	Pig.17377	0.0265595	0.0819383	0.0441892	0.0258361	0.0216564	0	0	0	0	0.022242
Chr02_152254104_152319280		0	0	0	0	0	0	0.308278	0.23771	0.402653	0.105405
Chr02_155636386_155663230	Pig.20857	0.522337	0.540793	0.715865	0.581312	0.42591	0.46327	0.0692053	0.0843486	0.09292	0.38844
Chr02_156944449_156984195		0.053119	0.0245815	0.053027	0.0322951	0.0721881	0.0971373	0.157285	0.145693	0.408848	0.116019
Chr02_159713586_159713781		0	0	0	0	0	0	0.0125828	0.0306722	0.0433627	0.009624
Chr02_161584456_161587851	Pig.20939	0.0354127	0.0737444	0.0707027	0.0581312	0	0.0597768	0	0	0.0123893	0.034462
Chr02_162778048_162784074	Pig.21711	0.150504	0.270396	0.273973	0.116262	0.166033	0.074721	0.685762	0.759137	0.867254	0.373782
Chr02_4961816_4965986	Pig.12013	0.221329	0.131101	0.176757	0.161475	0.137157	0.216691	0.0377484	0.0306722	0.055752	0.129854
Chr02_56247505_56259953	Pig.02459	0.115091	0.0901321	0.106054	0.0904263	0.0505317	0.0298884	0	0	0	0.053569
Chr02_60658293_60663530	Pig.02468	0.106238	0.131101	0.0972162	0.0775082	0.108282	0.0597768	0	0	0	0.064458
Chr02_64288819_64310703	MSTRG.4458,MSTRG.4459,Pig.02491	0	0	0.0353514	0	0	0	0.257947	0.176365	0.161061	0.070081
Chr02_64570850_64579384	MSTRG.4463,Pig.02493	0	0	0	0	0	0	0.0125828	0.0306722	0.055752	0.011001
Chr02_70309759_70310360	Pig.02537	0.053119	0.0819383	0.0618649	0.0258361	0	0.0523047	0	0	0	0.030563
Chr02_80315127_80316205	Pig.12229	0	0	0	0	0	0	0.0629139	0.0306722	0.117699	0.023476
Chr02_80316000_80316205	Pig.12229	0	0	0	0	0	0	0.113245	0.0766805	0.123893	0.034869
Chr02_84439685_84443541	Pig.16229	0	0	0	0	0	0	0.195033	0.161029	0.0867254	0.049199
Chr02_92734565_92744854	MSTRG.5482	0.0442659	0.0655506	0.12373	0.0193771	0.0216564	0.0224163	0.201325	0.115021	0.136283	0.083292
Chr02_95298630_95299695	Pig.06350	0.053119	0.049163	0.0265135	0.0581312	0.0794069	0.074721	0.144702	0.145693	0.198229	0.092187
Chr03_105960945_105982265	MSTRG.9694,Pig.17769	0.0177063	0.0245815	0	0.0193771	0.0288752	0.0149442	0.0817881	0.0613444	0.0495574	0.03313
Chr03_111561487_111577057	Pig.11639	0.0885317	0.0901321	0.106054	0.0516721	0.036094	0.074721	0	0	0.0433627	0.054508
Chr03_116800433_116800867	Pig.16768	0.336421	0.540793	0.45073	0.161475	0.24544	0.209219	0.031457	0.0383403	0.018584	0.225829
Chr03_126206126_126206928	Pig.21565	0.0973849	0.21304	0.141405	0.0581312	0.0216564	0.104609	0.0125828	0	0.0247787	0.074843
Chr03_49988991_50015826	Pig.04812	0.053119	0.139295	0.194432	0.0775082	0.036094	0.0373605	0	0	0	0.059757
Chr03_93652036_93670231	Pig.09212	0.0354127	0.049163	0	0.0258361	0.0216564	0.0224163	0	0	0	0.017165
Chr04_110101379_110134080	Pig.01698	0	0	0	0.0452131	0	0.0149442	0.201325	0.145693	0.192035	0.066579
Chr04_28268052_28272728	MSTRG.10816,Pig.08101	0	0	0	0	0	0	0.415232	0.291386	0.433627	0.126694
Chr04_30299278_30309026	Pig.08107	0.274448	0.467048	0.424216	0.0968853	0.194908	0.0971373	0	0	0	0.172738
Chr04_4037434_4061942	Pig.13340	0.0265595	0.122907	0.150243	0.0258361	0.0216564	0.0373605	0	0	0	0.042729
Chr04_42637595_42638483	Pig.01470	0.0619722	0.0737444	0.114892	0.0258361	0.0649693	0.0298884	0.0188742	0	0.0123893	0.04473
Chr04_58498565_58501388	Pig.14062,MSTRG.11105	0.805639	1.11436	1.01635	0.561935	0.353722	0.448326	0.100662	0.0536764	0.0495574	0.50047
Chr04_58547233_58562535	Pig.14062,MSTRG.11105	0.123944	0.38511	0.114892	0.0904263	0.036094	0.0523047	0.0125828	0	0	0.090595
Chr04_64703098_64703528		0.0354127	0.049163	0.0265135	0.0258361	0.0144376	0	0	0	0	0.016818
Chr04_77070685_77073952	Pig.10646,MSTRG.11434,MSTRG.11433	0	0.049163	0	0	0	0.0298884	0.106954	0.0843486	0.037168	0.034169
Chr04_80611471_80622183	Pig.10548	0.0885317	0.0737444	0.0441892	0.0258361	0.0216564	0.0224163	0.169868	0.0460083	0.0805307	0.063642
Chr05_104214626_104274170	MSTRG.14747	0	0	0.0353514	0	0	0	0.0817881	0.0920166	0.09292	0.033564
Chr05_104253525_104274170	MSTRG.14747	0.0265595	0.049163	0.0353514	0.0193771	0.0144376	0.0224163	0.239073	0.153361	0.111504	0.074583
Chr05_106667069_106690377	Pig.13290,MSTRG.14805	0	0	0	0	0	0	0.0880795	0.0536764	0.130088	0.030205
Chr05_106696908_106702791	Pig.13290,MSTRG.14805	0	0	0	0	0	0	0.138411	0.122689	0.037168	0.033141
Chr05_11188042_11212141	Pig.07621	0	0	0.0176757	0	0	0	0.0251656	0.0536764	0.0495574	0.016231
Chr05_20526478_20580658	Pig.19106	0.212476	0.327753	0.220946	0.148557	0.0577505	0.0821931	0.031457	0.0460083	0.0123893	0.126615
Chr05_20526478_20598492	Pig.19106	0.159357	0.163877	0.132568	0.0516721	0.0433129	0.0298884	0	0	0	0.064519
Chr05_20526478_20617636	Pig.19106	0.0708254	0.122907	0.114892	0.0581312	0.036094	0.0597768	0	0	0.0123893	0.05278
Chr05_21492507_21494054	Pig.14005	0.0177063	0.0983259	0	0.0387541	0	0	0.339735	0.23771	0.0619467	0.088242
Chr05_28687240_28690035		0	0	0	0	0	0	0.0943709	0.0460083	0.105309	0.027299
Chr05_43684815_43744217	Pig.06613	0	0.0163877	0	0.012918	0	0.0224163	0.0629139	0.0920166	0.111504	0.035351
Chr05_48391369_48407553	Pig.06589	0.247889	0.204846	0.397703	0.155016	0.158814	0.0821931	0	0	0	0.138496
Chr05_48391369_48424370	Pig.06589	0.230182	0.0983259	0.194432	0.0258361	0.0794069	0.0224163	0	0	0	0.072289
Chr05_54141653_54170120	MSTRG.13889,Pig.09598	0	0	0	0	0	0	0.100662	0.0536764	0.111504	0.029538
Chr05_65803355_65828340		0	0	0	0	0	0	0.0943709	0.0383403	0.0309733	0.018187
Chr05_66635943_66647337	Pig.07503	0.0177063	0.0245815	0.0353514	0	0.0288752	0	0.0817881	0.0996847	0.0495574	0.037505
Chr05_66635943_66654569	Pig.07503	0.0708254	0.0901321	0.159081	0.0258361	0.0866257	0.127026	0.132119	0.245378	0.123893	0.11788
Chr05_68026189_68027246	Pig.07513	0.0354127	0.17207	0.0795406	0.0452131	0.0794069	0.0448326	0.0188742	0	0	0.052817
Chr05_72050161_72071860	Pig.07534	0.0796785	0.180264	0.238622	0.12918	0.0794069	0.112081	0.0188742	0.0153361	0.0495574	0.100333
Chr05_84175407_84176240	MSTRG.14449,Pig.04063	0.053119	0.114714	0.106054	0.0775082	0.0505317	0.0523047	0.144702	0.130357	0.142477	0.096863
Chr05_99164719_99181403	MSTRG.14656,Pig.11752	0.0265595	0.0245815	0.0441892	0.0258361	0.036094	0	0.220199	0.130357	0.179645	0.076385
Chr06_108820298_108820413	Pig.16623	0	0	0	0	0	0	0.327153	0.207037	0.322123	0.095146
Chr06_11538093_11556397		0.0973849	0.0737444	0.0883784	0.0581312	0.0721881	0.0298884	0	0	0	0.046635
Chr06_119254850_119273969	MSTRG.17506	0.0619722	0.0655506	0.0265135	0.0645902	0.0577505	0.0373605	0	0	0	0.03486
Chr06_125971884_125972374	Pig.16043	0.0265595	0.0245815	0.0353514	0.0258361	0	0.0149442	0	0	0	0.014141
Chr06_137020965_137029577	Pig.15005	0.0708254	0.0245815	0.0795406	0	0	0.0448326	0	0	0	0.02442
Chr06_14381044_14387920	Pig.12451	0	0	0	0	0	0	0.0629139	0.122689	0.0495574	0.026129
Chr06_14477450_14494363	MSTRG.15243	0	0	0	0	0	0	0.320861	0.245378	0.266371	0.092512
Chr06_160725112_160742417	Pig.15713	0.442659	0.360528	0.24746	0.161475	0.158814	0.156914	0.0566225	0.0383403	0.055752	0.186507
Chr06_40368775_40376408		0.0619722	0.204846	0.185595	0.0645902	0.0577505	0.0298884	0	0	0	0.067182
Chr06_40375921_40376408		0.053119	0.0245815	0.0441892	0.0193771	0.0216564	0.0224163	0	0	0	0.020593
Chr06_49238260_49238933	Pig.02789	0.398393	0.630925	0.848433	0.303574	0.332065	0.343716	0	0.0306722	0.037168	0.324994
Chr06_54767318_54781593	Pig.03600	0.0354127	0.139295	0.212108	0.0452131	0.115501	0.0971373	0	0	0	0.07163
Chr06_54767318_54808170	Pig.03600	0.053119	0.180264	0.167919	0.116262	0.0721881	0.0448326	0	0	0	0.070509
Chr06_61228450_61283077	MSTRG.15623,Pig.03622	0.106238	0.237621	0.24746	0.187312	0.18047	0.0896652	0.031457	0.0383403	0.018584	0.12635
Chr06_61490852_61503632	Pig.03624	0.0442659	0.0573568	0	0.012918	0.0216564	0	0.188742	0.168697	0.0867254	0.064485
Chr06_96048045_96062663	Pig.08606	0.0354127	0.0409691	0.0265135	0.0322951	0.0216564	0	0.176159	0.107353	0.223008	0.073707
Chr06_9953190_9955184	Pig.14721	0	0.0737444	0.0265135	0	0.0216564	0.0373605	0	0	0	0.017697
Chr07_104353059_104373328		0	0	0	0	0	0	0.0692053	0.0460083	0.111504	0.025191
Chr07_127317226_127328596	Pig.11473	0.380686	0.114714	0.0883784	0.0968853	0.108282	0.104609	0	0	0	0.099284
Chr07_23444137_23455147	Pig.19585	0.486924	0.401498	0.415378	0.0968853	0.115501	0.14197	0.0251656	0.0536764	0.0123893	0.194376
Chr07_35429135_35449112	MSTRG.19801	0	0	0	0	0.0433129	0	6.33543	4.90755	4.80706	1.78815
Chr07_35448459_35546999		0	0	0.0353514	0	0	0	12.9414	17.9969	14.4274	5.04456
Chr07_36723571_36725562		0.53119	0.868546	0.671676	0.542558	0.454785	0.343716	0.0503312	0	0.0123893	0.386132
Chr07_85797913_85806784		0.239036	0.237621	0.185595	0.213148	0.12272	0.127026	0.031457	0.0460083	0.055752	0.139818
Chr07_89693469_89694186	Pig.08443	0.0885317	0.0819383	0.0353514	0.0710492	0.0721881	0.0821931	0	0	0	0.047917
Chr07_95086666_95104859	MSTRG.20849	0.053119	0.0245815	0.0353514	0.0193771	0.0144376	0.0373605	0.100662	0.0690125	0.111504	0.051712
Chr07_97598783_97651052		0.053119	0.0573568	0.0795406	0.0516721	0.0721881	0.127026	0	0	0	0.048989
Chr07_97649092_97651052		0.053119	0.114714	0.053027	0.0581312	0	0.0523047	0	0	0	0.036811
Chr07_97789171_97799770	Pig.08775	0.221329	0.229427	0.0795406	0.0839672	0.18047	0.0821931	0	0	0	0.097436
Chr08_117809709_117824540	Pig.00649	0	0	0	0	0.0216564	0	0.0943709	0.0766805	0.0681414	0.028983
Chr08_139877592_139902897	Pig.00525	0.0973849	0.155683	0.150243	0	0.0288752	0.0448326	0.188742	0.253046	0.09292	0.112414
Chr08_15357160_15363180	Pig.04163	0.265595	0.122907	0.185595	0.0775082	0.0577505	0.0971373	0.0188742	0.0230042	0	0.094263
Chr08_27230303_27261524	Pig.12465	0	0.0737444	0	0.012918	0.0288752	0	0	0	0	0.012838
Chr08_49633206_49660217	Pig.05336	0.0442659	0.0737444	0.0618649	0.0387541	0.0433129	0.0298884	0.106954	0.115021	0.0805307	0.066037
Chr08_71012313_71017161	MSTRG.22686,Pig.08321	0	0	0	0	0	0	0.22649	0.306722	0.377875	0.101232
Chr08_71012313_71018900	MSTRG.22686,Pig.08321	0	0	0	0	0	0	0.0943709	0.122689	0.117699	0.037195
Chr08_71012313_71020074	MSTRG.22686,Pig.08321	0	0	0	0	0	0	0.232782	0.391071	0.284955	0.100979
Chr08_71021523_71023766	MSTRG.22686	0	0	0	0	0	0	0.289404	0.283718	0.284955	0.095342
Chr08_71078825_71090128		0	0	0	0	0	0	0.0754967	0.0920166	0.055752	0.024807
Chr08_71080336_71084796	Pig.08323	0	0	0	0	0	0	0.352318	0.291386	0.315928	0.106626
Chr08_87802538_87815783	Pig.01059	0	0.0819383	0.0883784	0.0452131	0	0.0597768	0	0	0	0.03059
Chr08_89060362_89088138	Pig.01050	0	0.0655506	0.0353514	0.0258361	0.0288752	0.0224163	0	0	0	0.019781
Chr09_10030986_10046260		0	0	0	0	0	0	1.17649	0.858822	1.20796	0.360364
Chr09_110087896_110158133	Pig.11675	0.123944	0.147489	0.24746	0.0452131	0.0433129	0.0523047	0	0	0	0.073303
Chr09_116505101_116511736	MSTRG.25472,Pig.08139	0.0708254	0.155683	0.20327	0.0968853	0.0721881	0.074721	0	0	0	0.074841
Chr09_116510800_116511736	MSTRG.25472,Pig.08139	0.0177063	0.0163877	0.0265135	0.0322951	0.0144376	0	0	0	0	0.011927
Chr09_117715212_117716726	Pig.08150	0.327567	0.622731	0.397703	0.232525	0.151595	0.194275	0.0377484	0.0383403	0.018584	0.224563
Chr09_124151096_124157955	Pig.12901	0.0354127	0	0	0.0193771	0	0	0.132119	0.0153361	0.0247787	0.025225
Chr09_132363589_132363802	MSTRG.25786,Pig.20569	0	0.180264	0	0.0258361	0	0.0597768	0	0	0	0.029542
Chr09_132961125_133032137	Pig.10255	0.053119	0.0245815	0.0441892	0.0516721	0.0216564	0.0224163	0	0	0	0.024182
Chr09_133753630_133848763	Pig.10246	0.115091	0.237621	0.167919	0.0452131	0.0577505	0.0597768	0	0	0	0.07593
Chr09_16536395_16537017	Pig.04694	0.0442659	0.0983259	0.0972162	0.0322951	0.0288752	0.0523047	0.0125828	0	0.018584	0.042717
Chr09_38770634_38831263		0.159357	0.049163	0	0	0	0	2.74305	1.57195	2.09999	0.735946
Chr09_45493560_45496209	Pig.00341	0	0	0	0	0	0	0.100662	0.138025	0.117699	0.039598
Chr09_73629528_73630300	Pig.00508	0.0265595	0.0655506	0.114892	0	0.0433129	0	0	0	0	0.027813
Chr09_8107518_8113176	Pig.14368	0	0	0	0.012918	0.0144376	0	0.0943709	0.0690125	0.0867254	0.030829
Chr09_8107518_8117610	Pig.14368	0.159357	0.188458	0.397703	0.116262	0.0866257	0.164386	0.792716	0.720797	0.774334	0.377849
Chr09_90951665_90967965		0.0619722	0.0819383	0.053027	0.0904263	0.0505317	0	0.515894	0.168697	0.303539	0.147336
Chr09_92664524_92666467	MSTRG.25007,Pig.06854	0.336421	0.516211	0.459568	0.238984	0.332065	0.410965	0.0754967	0.115021	0.117699	0.289159
Chr10_17210237_17246070	Pig.10851,MSTRG.26305	0.0973849	0.245815	0.265135	0.142098	0.166033	0.17933	0.0251656	0.0843486	0.037168	0.138053
Chr10_20961970_20996575	Pig.11163	0.0177063	0.0901321	0.141405	0.0258361	0.0577505	0	0	0	0	0.036981
Chr10_20969083_20996575	Pig.11163	0.106238	0.147489	0.176757	0.0775082	0.0649693	0.0597768	0	0	0	0.070304
Chr10_22670141_22673756	Pig.11154	0.0796785	0.221233	0.114892	0.0710492	0.0433129	0.0448326	0	0	0	0.063889
Chr10_33794237_33815106	MSTRG.26482,Pig.17816	0.0177063	0	0	0	0.0216564	0	0.031457	0.0766805	0.0867254	0.026025
Chr10_39752709_39765278		0.0265595	0.0163877	0	0	0	0	0.339735	0.345062	0.216813	0.104951
Chr10_56001317_56001808		0.0796785	0.0409691	0.132568	0.0452131	0.0216564	0.0224163	0	0	0	0.038056
Chr10_61841725_61864145	Pig.05022	0.416099	0.77022	1.09589	0.258361	0.281534	0.276468	0.106954	0.107353	0.074336	0.376357
Chr10_61852304_61864145	Pig.05022	0.053119	0.139295	0.212108	0.0258361	0.0216564	0.0224163	0	0	0	0.052715
Chr10_71425687_71427450	MSTRG.27019	0.0619722	0.0901321	0.106054	0.0258361	0.0144376	0.0448326	0	0	0	0.038141
Chr10_75879157_75880339	MSTRG.27145,Pig.09943	0.354127	0.21304	0.229784	0.155016	0.166033	0.164386	0.987749	0.651784	0.854864	0.419643
Chr11_12201402_12245406	Pig.03511	0.203623	0.245815	0.353514	0.135639	0.108282	0.119554	0.0817881	0.0460083	0.0495574	0.149309
Chr11_12275090_12300096	Pig.03511	0.0885317	0.114714	0.0618649	0.0387541	0.0721881	0.0373605	0	0	0	0.045935
Chr11_12285086_12300096	Pig.03511	0.053119	0	0.0795406	0.0645902	0	0	0	0	0	0.021917
Chr11_12464386_12465127	Pig.03510	0.150504	0.10652	0.0707027	0.109803	0.0577505	0.0149442	0.0188742	0	0	0.058789
Chr11_15621464_15623081	Pig.03488	0.0354127	0.049163	0.0176757	0.012918	0.0144376	0.0149442	0	0	0	0.016061
Chr11_29573414_29594388	Pig.07336	0.0177063	0.0409691	0.0795406	0.0322951	0.0144376	0.0448326	0	0	0	0.025531
Chr11_34579623_34579988	Pig.07349	0.0442659	0.114714	0.0618649	0.0193771	0.0288752	0.0523047	0	0	0	0.035711
Chr11_73469919_73470694		0.265595	0.237621	0.335838	0.219607	0.166033	0.0971373	0.0566225	0.0460083	0.018584	0.160338
Chr11_76729156_76730764	Pig.07943	0.141651	0.0245815	0.212108	0.0581312	0.0794069	0	0	0	0	0.05732
Chr11_82932722_82981452	Pig.07964	0	0	0	0	0	0	0.0692053	0.0536764	0.0867254	0.02329
Chr12_21184224_21202762	Pig.11854	0.0619722	0.049163	0.114892	0.0193771	0.0505317	0.0224163	0	0	0	0.035372
Chr12_27312206_27315092	MSTRG.29412	0	0.049163	0.053027	0	1.00341	0.134498	0	0	0	0.137789
Chr12_27312206_27348924	MSTRG.29412,Pig.11225	0.0265595	0.0163877	0	1.17554	0.960102	0.0298884	0.18245	0.107353	0.037168	0.281717
Chr12_28048634_28069283	Pig.11217	0.0354127	0.0655506	0.114892	0.0193771	0.0144376	0.0672489	0	0	0	0.035213
Chr12_28082367_28086865	Pig.11217	0.495778	0.598149	0.556784	0.471508	0.440347	0.336244	0.0692053	0.0153361	0.0433627	0.336302
Chr12_30652472_30656518	Pig.11189	0.053119	0.10652	0.106054	0.0516721	0.0433129	0.074721	0	0	0	0.048378
Chr12_31796253_31823882	Pig.11176	0.212476	0.303172	0.362351	0.12918	0.108282	0.149442	0.0377484	0.0613444	0.0433627	0.156373
Chr12_47059189_47062026		0.247889	0.221233	0.132568	0.0968853	0.101063	0.0523047	0	0.0230042	0	0.097216
Chr12_48468550_48486979		0.053119	0.0573568	0.185595	0.245443	0.0577505	0.343716	0	0	0	0.104776
Chr12_56004263_56093033		0	0	0	0	0	0	0.276821	0.291386	0.303539	0.096861
Chr12_6014140_6037875		0.053119	0.131101	0.12373	0.0258361	0.0577505	0.0523047	0.125828	0.115021	0.154867	0.093284
Chr13_102470212_102479788	MSTRG.32189,Pig.06534	0	0	0	0	0	0	0.736093	0.728465	0.65044	0.235
Chr13_102490154_102498161	MSTRG.32189,Pig.06534	0	0	0	0	0	0	0.0503312	0.0536764	0.0309733	0.014998
Chr13_10327454_10331181	Pig.15846	0.0885317	0.0901321	0.0707027	0.0387541	0.0433129	0.0523047	0	0	0.0123893	0.044014
Chr13_10327454_10337372	Pig.15846	0.0177063	0.0245815	0.0353514	0	0.036094	0.0149442	0	0	0	0.014297
Chr13_10429524_10429861	Pig.15844	0.0885317	0.0901321	0.0707027	0.0775082	0.0288752	0.0672489	0	0	0	0.047
Chr13_105669263_105669434		0	0	0	0	0	0	0.0503312	0.0766805	0.105309	0.025813
Chr13_126126025_126150599	Pig.02084	0.0708254	0.049163	0.0795406	0.0452131	0.0866257	0.0224163	0	0	0	0.039309
Chr13_126811720_126850038	Pig.02081	0.115091	0.0573568	0.0972162	0.012918	0	0.0224163	0.54106	0.483087	0.699998	0.22546
Chr13_126832355_126850038	Pig.02081	0.407246	0.262202	0.167919	0.142098	0.0794069	0.0821931	1.12616	1.31124	1.72831	0.589642
Chr13_130153766_130160627	Pig.02066	0.0177063	0.0409691	0.0707027	0	0.0649693	0.0149442	0	0	0	0.023255
Chr13_188539138_188539513	Pig.21788,MSTRG.33300	0.123944	0.0573568	0	0.0258361	0	0.0523047	0	0	0	0.028827
Chr13_30295122_30307830	Pig.01539	0.0708254	0.0573568	0.106054	0.0452131	0.0577505	0.0821931	0	0	0	0.046599
Chr13_46154665_46165821	Pig.14691,MSTRG.31383	0.0708254	0.254009	0.185595	0.0581312	0.0505317	0.0672489	0	0	0	0.07626
Chr13_46154665_46178093	Pig.14691,MSTRG.31383	0.150504	0.0983259	0.0883784	0.0193771	0.0288752	0.0149442	0	0	0	0.044489
Chr13_48146150_48147848	MSTRG.31444,Pig.17823,MSTRG.31443	0.0354127	0.0327753	0.0353514	0.0258361	0.0577505	0	0	0	0	0.020792
Chr13_48514433_48516059	Pig.17826	0.141651	0.0983259	0.0441892	0.0322951	0.0216564	0.0373605	0	0	0	0.04172
Chr13_54850041_54856348	Pig.06073,MSTRG.31592	0.0619722	0.0245815	0.0353514	0.012918	0	0.0224163	0	0	0	0.017471
Chr13_57321321_57326544		0.0973849	0.139295	0.141405	0.012918	0.0505317	0.0298884	0	0	0	0.05238
Chr13_60625423_60715757	Pig.06117	0.123944	0.122907	0.220946	0.0710492	0.0433129	0.0672489	0	0.0306722	0.018584	0.077629
Chr13_68731709_68734966	Pig.04754,MSTRG.31765	0.0265595	0.163877	0.0265135	0	0.036094	0	0	0	0	0.028116
Chr13_7644063_7653595	MSTRG.30700,Pig.07899	0.132798	0.17207	0.176757	0.0581312	0.137157	0.0597768	0.176159	0.222373	0.148672	0.142655
Chr13_86804294_86815919	Pig.11303	0.38954	0.319559	0.433054	0.122721	0.194908	0.104609	0.0566225	0.0843486	0.018584	0.19155
Chr13_98711348_98734424	Pig.06481	0.0973849	0.0573568	0.0618649	0.0322951	0.0649693	0.0298884	0	0	0.0247787	0.040949
Chr13_99751851_99755967	Pig.06491	0.106238	0.221233	0.114892	0.122721	0.0649693	0.074721	0.0440398	0.0230042	0.018584	0.087823
Chr14_113362657_113380470		0.504631	0.393304	0.742379	0.45859	0.310409	0.231635	5.41689	3.42762	5.03627	1.83575
Chr14_129750351_129804031	MSTRG.35885,Pig.12074	0.0708254	0.10652	0.0707027	0.0322951	0.0288752	0.0298884	0.188742	0.168697	0.142477	0.093225
Chr14_129787047_129804031	MSTRG.35885,Pig.12074	0.0442659	0.0163877	0.0707027	0.0710492	0.036094	0.074721	0.106954	0.191701	0.260176	0.096895
Chr14_140353741_140355292	Pig.22737	0	0	0	0	0	0	0.188742	0.0920166	0.223008	0.055974
Chr14_21611369_21624122	Pig.15735	0.0354127	0.0163877	0.0353514	0.0516721	0.0794069	0.0149442	0	0	0	0.025908
Chr14_39164972_39170296	Pig.07737	0.0619722	0.049163	0.0353514	0.0258361	0.0649693	0	0	0.0153361	0	0.02807
Chr14_41912046_41913507	Pig.07715	0.239036	0.180264	0.159081	0.0968853	0.0649693	0.074721	0.0377484	0.0230042	0.0123893	0.098678
Chr14_41912046_41931580	Pig.07715	0.132798	0.204846	0.265135	0.187312	0.151595	0.17933	0	0.0306722	0.0123893	0.129342
Chr14_41930481_41931580	Pig.07715	0.19477	0.376916	0.238622	0.142098	0.173251	0.17933	0.0251656	0	0.018584	0.14986
Chr14_42930420_42931617	Pig.05610	0.115091	0.0573568	0.053027	0.0387541	0.0794069	0.0224163	0	0	0	0.040672
Chr14_9266160_9274270	Pig.05775	0.265595	0.368722	0.24746	0.0775082	0.108282	0.0821931	0.0503312	0.0383403	0.0309733	0.141045
Chr15_108518521_108523889	Pig.00007	0.053119	0.0901321	0.0265135	0.0710492	0	0	0.213907	0.176365	0.18584	0.09077
Chr15_111123633_111129108	Pig.11696	0.0354127	0.0409691	0	0.012918	0.036094	0.0149442	0	0	0	0.015593
Chr15_114471451_114533637	Pig.11726	0.0619722	0.0573568	0.053027	0.012918	0.0144376	0.0298884	0	0	0	0.025511
Chr15_120570504_120570627		0.141651	0.0819383	0	0.0581312	0.0721881	0.119554	0	0	0	0.052607
Chr15_16400419_16419151	Pig.04261	0.053119	0.0163877	0.0441892	0	0.0144376	0.0448326	0	0	0	0.019218
Chr15_55229766_55237802		0	0	0	0	0.0144376	0	0.0629139	0.0306722	0.0433627	0.016821
Chr15_55572130_55584996	Pig.02646	0	0	0.0353514	0	0	0	0.031457	0.0613444	0.0495574	0.019746
Chr15_55579929_55584996	Pig.02646	0.0708254	0.10652	0.106054	0.0258361	0	0.0373605	0.0943709	0.268382	0.09292	0.089141
Chr15_66099298_66122813	Pig.00251	0	0.0655506	0.0265135	0.0193771	0.0433129	0.0149442	0.125828	0.176365	0.154867	0.06964
Chr15_6770057_6775241		0.132798	0.188458	0.0883784	0.0322951	0.0216564	0.0224163	0	0	0	0.054
Chr15_76012998_76035026	Pig.00205	0.0708254	0.0573568	0.0441892	0.0193771	0.0505317	0.0448326	0	0	0	0.031901
Chr15_89874611_89878935	Pig.00114	0.0442659	0.0409691	0.0353514	0.0452131	0.0433129	0.0448326	0	0	0	0.028216
Chr16_10658431_10665832	Pig.12529	0.115091	0.122907	0.265135	0.103344	0.115501	0.112081	0.320861	0.260714	0.229203	0.18276
Chr16_15371403_15432891	Pig.04581	0.141651	0.122907	0.185595	0.0968853	0.0577505	0.104609	0	0	0	0.078822
Chr16_32443001_32449725	Pig.01119	0.0265595	0.139295	0.0972162	0.012918	0.0577505	0.0597768	0	0	0	0.043724
Chr16_35124825_35153335	Pig.01137	0	0.0655506	0.0353514	0	0.0433129	0.0448326	0	0	0	0.021005
Chr16_53671468_53694230	Pig.01244,MSTRG.38604	0.327567	0.38511	0.415378	0.180853	0.202127	0.224163	0	0	0	0.1928
Chr16_53671468_53741947	Pig.01244,MSTRG.38604	0.185917	0.131101	0.397703	0.20023	0.0866257	0.127026	0	0	0	0.1254
Chr16_53729322_53741947	Pig.01244,MSTRG.38604	0.0885317	0.245815	0.176757	0.0581312	0.101063	0.112081	0	0	0	0.086931
Chr16_54701604_54707029		0.053119	0.049163	0.0176757	0.012918	0	0.0448326	0	0	0	0.019745
Chr16_56515608_56558089	Pig.01261	0.177063	0.114714	0.212108	0.12918	0.0938445	0.134498	0	0	0	0.095712
Chr16_58703341_58719462	Pig.16455	0.0354127	0	0	0	0	0	0.163576	0.161029	0.179645	0.059963
Chr16_60541346_60541707	MSTRG.38732	0.132798	0.204846	0.141405	0.148557	0.158814	0.074721	0.0377484	0.0153361	0	0.101581
Chr16_6840714_6845508		1.60242	0.565374	0.556784	0.426295	0.772413	0.60524	2.73047	2.72983	2.50884	1.38863
Chr16_6845373_6845508		0.947289	0.442467	0.380027	0.174393	0.462004	0.373605	1.39669	1.78666	1.5115	0.830514
Chr17_12099933_12151084	Pig.13480	0	0	0	0	0	0	0.0692053	0.168697	0.105309	0.038135
Chr17_12219923_12224684	Pig.13480	0	0.0327753	0.0176757	0	0.0216564	0.0373605	0.591391	0.337394	0.37168	0.156659
Chr17_12219923_12243444	Pig.13480	0.16821	0.131101	0.0795406	0.0258361	0.0433129	0.0373605	1.01921	0.920166	0.879643	0.367153
Chr17_13394888_13399207	Pig.13496	0.0619722	0.0819383	0.0883784	0.0258361	0.0649693	0	0	0	0	0.035899
Chr17_4449441_4457652	MSTRG.38895	0.0177063	0	0	0	0	0	0.0754967	0.0306722	0.055752	0.019959
Chr17_4560664_4563512	Pig.08645	0	0	0	0	0	0	0.0817881	0.0766805	0.0619467	0.024491
Chr17_49185401_49188054		0.0619722	0.139295	0.194432	0.0322951	0.0794069	0.0523047	0	0	0	0.06219
Chr17_7571166_7574449		0.318714	0.827577	0.565622	0.361705	0.252658	0.164386	0.0251656	0	0	0.279536
Chr18_10736400_10765303	Pig.17902	0.0177063	0.0163877	0	0.012918	0	0	0.0188742	0.0536764	0.074336	0.021544
Chr18_11844787_11867871	MSTRG.40295,Pig.01268	0	0	0	0	0.0144376	0	0.0754967	0.0613444	0.0433627	0.021627
Chr18_11856641_11867871	MSTRG.40295,Pig.01268	0.0177063	0	0	0	0	0	0.515894	0.345062	0.470795	0.14994
Chr18_31666003_31666275	Pig.01383	0.239036	0.155683	0.159081	0.0904263	0.0649693	0.0448326	0.0377484	0.0153361	0.0123893	0.091056
Chr18_31666003_31703354	Pig.01383	0.885317	1.25366	1.38754	0.600689	0.411472	0.410965	0.0566225	0.0460083	0.0681414	0.568935
Chr18_38971782_38985420	Pig.07046	0.053119	0.0409691	0.132568	0.012918	0.0216564	0.0821931	0	0	0.0123893	0.039535
Chr18_49965466_49966837	Pig.15666	0.0354127	0.0163877	0.0795406	0	0.0144376	0.0523047	0.176159	0.138025	0.130088	0.071373
Chr18_53610429_53620130	Pig.15553	0.177063	0.147489	0.229784	0.0839672	0.0433129	0.0597768	0.0188742	0.0230042	0	0.08703
ChrX_112727741_112741438	Pig.04480	0.0619722	0.0163877	0	0.012918	0	0	0.163576	0.0843486	0.142477	0.05352
ChrX_21050389_21065144	Pig.01775	0.106238	0.155683	0.167919	0.0387541	0.0649693	0.0821931	0.0125828	0	0	0.069815
ChrX_32827680_32872783	Pig.01823	0.0973849	0.0737444	0.159081	0.0775082	0.0505317	0.0298884	0	0	0	0.054238
ChrX_45213981_45219005	MSTRG.41530	0	0	0	0	0	0	0.113245	0.0843486	0.055752	0.02815
Scaffold109_2537105_2542457	MSTRG.42720,Pig.10028	0.0442659	0.0327753	0.0265135	0.0258361	0.0505317	0	0	0	0	0.019991
Scaffold118_6020664_6039588		0.283301	0.229427	0.176757	0.174393	0.129939	0.17933	0.031457	0.0383403	0.0619467	0.144988
Scaffold155_4873178_4891253	Pig.12801	0.0354127	0	0	0	0	0	0.125828	0.0843486	0.0681414	0.034859
