# Supplementary material for: Spatiotemporal Regulation of Circular RNA Expression During Ningxiang Pig Skeletal Muscle, Subcutaneous Fat, and Liver Development
Source: Research Square preprint supplement (doi:10.21203/rs.3.rs-111082/v1), 2020-11-20
Supplement: Supplementary file 3 [file aecbd418210e3ccce7f5c4ba.xls]

## Sheet: N30D_M vs N90D_M_DEcircRNAs
circRNA id	Host gene id	FC(N90D_M/N30D_M)	Log2FC(N90D_M/N30D_M)	Pvalue	Padjust	Significant	Regulate	N30D_M1	N30D_M2	N30D_M3	N90D_M1	N90D_M2	N90D_M3	N30D_M	N90D_M	gene_name	description	nr_hit_name
Chr01_103594729_103605128		0.0275624	-5.18116	0.00730215	0.180892	yes	down	0.0229421	0.0382381	0	0	0	0	0.0203934	0	#N/A	#N/A	#N/A
Chr01_11575048_11579583		0.430136	-1.21713	0.0272431	0.322044	yes	down	0.0688263	0.0546259	0.0859925	0.0232245	0.131957	0.0435727	0.0698149	0.0662514	#N/A	#N/A	#N/A
Chr01_126588251_126599240	Pig.10719	0.178413	-2.48671	0.0075105	0.182965	yes	down	0.0344131	0.0546259	0.0214981	0.030966	0	0.0145242	0.0368457	0.0151634	MGA-201	LOW QUALITY PROTEIN: MAX gene-associated protein [Sus scrofa]	XP_020953037.1
Chr01_129010315_129022227	Pig.14315	0.0792914	-3.65669	0.0178514	0.275626	yes	down	0.0229421	0	0	0	0	0	0.00764736	0	CASC4-201	protein CASC4 isoform X1 [Sus scrofa]	XP_020952200.1
Chr01_134987666_135001147	Pig.02305	0.396415	-1.33492	0.00427238	0.137031	yes	down	0.0458842	0.142027	0.0376217	0.0696735	0.0902864	0.0435727	0.0751777	0.0678442	TRPM7-201	transient receptor potential cation channel subfamily M member 7 isoform X1 [Sus scrofa]	XP_023989567.2
Chr01_136529850_136543063		0.178093	-2.48929	0.028138	0.324778	yes	down	0.0401487	0.0163878	0.0322472	0	0.0347255	0	0.0295945	0.0115752	#N/A	#N/A	#N/A
Chr01_13782443_13796440	Pig.03867,MSTRG.195	0.0471996	-4.40508	0.0425807	1	yes	down	0.0229421	0	0.0161236	0	0	0	0.0130219	0	#N/A	#N/A	#N/A
Chr01_140491850_140520766	Pig.02268	5.3786	2.42723	0.039399	0.373984	yes	up	0	0.0218503	0.0107491	0.123864	0.0972315	0.174291	0.0108665	0.131795	RFX7-201	DNA-binding protein RFX7 isoform X1 [Sus scrofa]	XP_020950488.1
Chr01_143295667_143312611	Pig.02252	0.271394	-1.88154	0.0334626	0.339868	yes	down	0.0458842	0.0273129	0	0.046449	0	0	0.024399	0.015483	RNF111-201	E3 ubiquitin-protein ligase Arkadia isoform X4 [Sus scrofa]	XP_013848379.1
Chr01_147921937_147922943	Pig.02226	16.3512	4.03133	0.0397514	1	yes	up	0	0	0	0.0387075	0.0138902	0.058097	0	0.0368982	HERC1-201	probable E3 ubiquitin-protein ligase HERC1 isoform X1 [Sus scrofa]	XP_020949597.1
Chr01_149967414_149992480	Pig.02205	15.1098	3.91742	0.0270603	0.322044	yes	up	0	0	0	0.0387075	0.0416706	0.0217864	0	0.0340548	WDR7-201	WD repeat-containing protein 7 isoform X1 [Sus scrofa]	XP_020949254.1
Chr01_173364048_173401800	Pig.07316	7.59273	2.92462	0.0457692	0.40377	yes	up	0	0	0	0.0232245	0.0138902	0.0145242	0	0.017213	BCKDHB-201	2-oxoisovalerate dehydrogenase subunit beta, mitochondrial isoform X1 [Sus scrofa]	XP_020938559.1
Chr01_176448874_176466186	Pig.00707	36.0971	5.17381	0.000172681	0.015254	yes	up	0	0	0	0.201279	0.0138902	0.0217864	0	0.0789852	ME1-201	NADP-dependent malic enzyme [Sus scrofa]	XP_001924368.2
Chr01_182642754_182716683	Pig.00740	0.0412695	-4.59878	0.00133583	0.0635982	yes	down	0.011471	0.0163878	0.0161236	0	0	0	0.0146608	0	CDK19-201	PREDICTED: cyclin-dependent kinase 19-like isoform X1 [Elephantulus edwardii]	XP_020946795.1
Chr01_184612953_184614388		0.310847	-1.68572	0.0127133	0.24211	yes	down	0.0286776	0.0546259	0.0644943	0.030966	0.0555608	0.0145242	0.0492659	0.0336837	#N/A	#N/A	#N/A
Chr01_222542490_222572939	Pig.03989	0.152098	-2.71693	0.0171188	0.275626	yes	down	0.0229421	0.0273129	0.0376217	0.015483	0.0138902	0	0.0292922	0.00979107	TRMT11-201	tRNA (guanine(10)-N2)-methyltransferase homolog isoform X1 [Sus scrofa]	XP_001928696.1
Chr01_225853573_225876920	Pig.04001	0.08942	-3.48326	0.0443247	0.395816	yes	down	0.0401487	0.0327755	0	0.015483	0	0	0.0243081	0.005161	ARHGAP18-201	rho GTPase-activating protein 18 isoform X4 [Sus scrofa]	XP_020944089.1
Chr01_23826187_23836101	Pig.06453	3.03739	1.60283	0.00169004	0.0756196	yes	up	0.126181	0.125639	0.112865	0.71996	0.888974	0.885979	0.121562	0.831637	VPS13A-201	LOW QUALITY PROTEIN: vacuolar protein sorting-associated protein 13A [Sus scrofa]	XP_020920767.1
Chr01_243632999_243642380	Pig.05180	0.310606	-1.68684	0.0256972	0.314455	yes	down	0.0401487	0.0819388	0.0376217	0.061932	0	0.0508348	0.0532364	0.037589	PPIL4-201	PREDICTED: peptidyl-prolyl cis-trans isomerase-like 4 isoform X1 [Dasypus novemcinctus]	XP_004752831.1
Chr01_251561636_251563858		0.287208	-1.79983	0.00609812	0.162991	yes	down	0.0917683	0.114714	0.123614	0.123864	0.0694511	0.0145242	0.110032	0.0692798	#N/A	#N/A	#N/A
Chr01_258902156_258922448	Pig.14662	0.0558461	-4.1624	0.0145278	0.260588	yes	down	0.0172066	0	0.0161236	0	0	0	0.0111101	0	AFDN-201	afadin isoform X5 [Sus scrofa]	XP_020941446.1
Chr01_32467155_32487321	Pig.03310	5.06977	2.34192	0.0253311	0.313755	yes	up	0	0.0218503	0.0107491	0.0851565	0.159737	0.130718	0.0108665	0.125204	CBWD1	COBW domain-containing protein 2 isoform X1 [Sus scrofa]	XP_001924427.4
Chr01_37897808_37898245	Pig.03277	4.38089	2.13122	0.00929783	0.203832	yes	up	0.0401487	0	0.0214981	0.147089	0.145847	0.305009	0.0205489	0.199315	KIAA2026-201	uncharacterized protein KIAA2026 homolog isoform X1 [Sus scrofa]	XP_003121963.3
Chr01_37930886_37959001	Pig.03277	0.30693	-1.70402	0.0180477	0.275626	yes	down	0.0458842	0.0983266	0.0107491	0.0541905	0.0347255	0.0217864	0.0516533	0.0369008	KIAA2026-201	uncharacterized protein KIAA2026 homolog isoform X1 [Sus scrofa]	XP_003121963.3
Chr01_48784512_48796978	Pig.03254	0.0228222	-5.45342	0.000175219	0.015254	yes	down	0.0344131	0.0273129	0.0161236	0	0	0	0.0259499	0	CNTLN-201	centlein isoform X1 [Sus scrofa]	XP_020918932.1
Chr01_50816744_50821922	Pig.16751,MSTRG.668	2.14908	1.10372	0.0329826	0.339756	yes	up	0.0172066	0.0764762	0.0483708	0.185796	0.32642	0.174291	0.0473512	0.228836	#N/A	#N/A	#N/A
Chr01_63694278_63700446	Pig.05416	13.8622	3.79309	0.0442381	0.395816	yes	up	0	0	0	0.030966	0.0486157	0.0145242	0	0.0313687	HIF1A-203	hypoxia-inducible factor 1-alpha [Sus scrofa]	XP_007193020.1
Chr01_64609502_64632618	Pig.05408	0.249	-2.00578	0.0287327	0.325529	yes	down	0.0172066	0.0437007	0.0322472	0.030966	0.0208353	0	0.0310515	0.0172671	MNAT1-201	CDK-activating kinase assembly factor MAT1 [Sus scrofa]	NP_001159788.1
Chr01_74523778_74537105	Pig.02889	17.0763	4.09392	0.0175399	0.275626	yes	up	0	0	0	0	0.0972315	0.0217864	0	0.0396726	SOS2-201	son of sevenless homolog 2 [Sus scrofa]	XP_020957098.1
Chr01_84804013_84812312	Pig.02859	0.186559	-2.4223	0.00302956	0.11272	yes	down	0.0573552	0.0983266	0.0107491	0.0232245	0.0277804	0.0217864	0.0554769	0.0242638	MIA2	melanoma inhibitory activity protein 2 isoform X2 [Sus scrofa]	XP_020929628.1
Chr01_85074434_85082125		0.328668	-1.6053	0.0433951	0.394464	yes	down	0.0573552	0.0382381	0.0698689	0.061932	0.0277804	0.0290485	0.0551541	0.039587	#N/A	#N/A	#N/A
Chr01_85074434_85093387		0.18645	-2.42314	0.00236564	0.0961082	yes	down	0.0745618	0.131102	0.102116	0.0232245	0.0555608	0.0508348	0.102593	0.0432067	#N/A	#N/A	#N/A
Chr01_90019121_90028359	Pig.02820	3.7622	1.91158	0.0256495	0.314455	yes	up	0.0229421	0	0.0161236	0.108381	0.118067	0.0944076	0.0130219	0.106952	LRCH1-201	leucine-rich repeat and calponin homology domain-containing protein 1 isoform X1 [Sus scrofa]	XP_013835974.2
Chr01_95256133_95262693		2.3612	1.23952	8.77925e-06	0.00236699	yes	up	0.378544	0.256742	0.370843	1.33154	1.64599	2.32388	0.335376	1.76714	#N/A	#N/A	#N/A
Chr02_10873867_10875081	Pig.14571	2.66105	1.412	0.000173645	0.015254	yes	up	0.246627	0.223966	0.290225	1.20767	1.4932	1.80827	0.253606	1.50305	MATR3	PREDICTED: matrin-3-like isoform X1 [Lipotes vexillifer]	XP_013850634.1
Chr02_110029999_110048860	Pig.09907	0.0272034	-5.20007	0.0263823	1	yes	down	0.0401487	0.0218503	0	0	0	0	0.0206663	0	USP47-201	ubiquitin carboxyl-terminal hydrolase 47 isoform X2 [Sus scrofa]	XP_020938974.1
Chr02_12181017_12182283	Pig.14550,MSTRG.3715	2.24485	1.16662	0.0153148	0.26364	yes	up	0.258098	0.300442	0.51058	0.836082	2.02103	2.44733	0.356374	1.76815	#N/A	#N/A	#N/A
Chr02_129557508_129571492	Pig.12557	0.0583406	-4.09936	0.0034134	0.119547	yes	down	0.011471	0.065551	0.0322472	0	0	0.0145242	0.0364231	0.00484141	QSER1-205	glutamine and serine-rich protein 1 [Sus scrofa]	XP_013849914.1
Chr02_142555971_142563374	Pig.20506	20.8415	4.38139	0.00139236	0.0652694	yes	up	0	0	0	0.0696735	0.0347255	0.0363106	0	0.0469032	AGBL2-201	cytosolic carboxypeptidase 2 isoform X1 [Sus scrofa]	XP_020938723.1
Chr02_146743201_146743466	Pig.15343	0.0715629	-3.80464	0.0236732	1	yes	down	0.0286776	0.0273129	0.0322472	0	0.0138902	0	0.0294126	0.00463007	SSRP1-201	PREDICTED: FACT complex subunit SSRP1 isoform X4 [Cebus capucinus imitator]	XP_003353912.1
Chr02_15158593_15165811	Pig.17377	27.3171	4.77173	0.00740406	0.181937	yes	up	0	0	0	0.077415	0.0555608	0.0508348	0	0.0612702	SEC24A-201	protein transport protein Sec24A [Sus scrofa]	NP_001230853.1
Chr02_15169011_15177107	Pig.17377	15.4225	3.94696	0.0382168	1	yes	up	0	0	0	0.046449	0.0208353	0.0363106	0	0.0345316	SEC24A-201	protein transport protein Sec24A [Sus scrofa]	NP_001230853.1
Chr02_158152493_158154207	Pig.17122	0.144358	-2.79228	0.00565695	0.156871	yes	down	0.0229421	0.0273129	0.0429962	0.015483	0	0.0145242	0.0310838	0.0100024	PPFIA1-201	liprin-alpha-1 isoform X8 [Sus scrofa]	XP_020938327.1
Chr02_159713586_159713781		0.164197	-2.6065	0.0159447	0.268417	yes	down	0.556346	0.322293	0.478333	0.232245	0.104177	0.152505	0.452324	0.162975	#N/A	#N/A	#N/A
Chr02_165287896_165303274		15.1061	3.91706	0.0206983	0.289302	yes	up	0	0	0	0.0387075	0.0416706	0.0217864	0	0.0340548	#N/A	#N/A	#N/A
Chr02_170546957_170554595	Pig.10209	0.0432173	-4.53225	0.0136811	0.252283	yes	down	0.0172066	0	0.0268726	0	0	0	0.0146931	0	PBX3-201	pre-B-cell leukemia transcription factor 3 isoform 1 [Homo sapiens]	NP_006186.1
Chr02_18121057_18128413	Pig.12410	0.0217664	-5.52175	0.000103795	0.0131777	yes	down	0.0344131	0.0218503	0.0268726	0	0	0	0.027712	0	FNIP1-201	folliculin-interacting protein 1 isoform X1 [Sus scrofa]	XP_020941073.1
Chr02_18182174_18198641	Pig.12409	0.32729	-1.61136	0.0146384	0.260837	yes	down	0.0975039	0.065551	0.0591198	0.0232245	0.0763962	0.0653591	0.0740582	0.0549933	RAPGEF6	rap guanine nucleotide exchange factor 6 isoform X1 [Sus scrofa]	XP_020941062.1
Chr02_28878006_28896777	Pig.07284,MSTRG.3982	0.0558872	-4.16134	0.0186824	1	yes	down	0.0172066	0	0.0161236	0	0	0	0.0111101	0	#N/A	#N/A	#N/A
Chr02_33534085_33534503	Pig.05649	0.186881	-2.41981	0.0416777	0.387171	yes	down	0.0172066	0.0327755	0	0	0	0.0217864	0.0166607	0.00726212	KCNN2-201	small conductance calcium-activated potassium channel protein 2 isoform X2 [Sus scrofa]	XP_020940295.1
Chr02_37935438_37948678		0.158333	-2.65897	0.00328385	0.116347	yes	down	0.0802973	0.0163878	0.0268726	0.0232245	0.0208353	0	0.0411859	0.0146866	#N/A	#N/A	#N/A
Chr02_64288819_64298085	MSTRG.4458,MSTRG.4459,Pig.02491	2.41776	1.27367	0.0192975	0.282357	yes	up	0.0688263	0.0491633	0.0644943	0.263211	0.270859	0.450251	0.060828	0.328107	#N/A	#N/A	#N/A
Chr02_64424585_64436763	Pig.02492,MSTRG.4458	0.0688489	-3.86042	0.0311635	0.332533	yes	down	0	0.0109252	0.0161236	0	0	0	0.00901625	0	#N/A	#N/A	#N/A
Chr02_7657822_7669705	Pig.16957	0.0559601	-4.15946	0.0313841	0.332533	yes	down	0.0172066	0	0.0161236	0	0	0	0.0111101	0	ARHGAP26-201	rho GTPase-activating protein 26 isoform X5 [Sus scrofa]	XP_020941105.1
Chr03_103588235_103591060	Pig.16548	5.78889	2.53329	0.0477444	0.412117	yes	up	0.011471	0	0	0.0387075	0.0486157	0.058097	0.00382368	0.0484734	USP7-201	PREDICTED: ubiquitin carboxyl-terminal hydrolase 7 isoform X1 [Odobenus rosmarus divergens]	XP_004401313.1
Chr03_106108689_106112194	Pig.17772	0.401054	-1.31813	0.0262995	0.317995	yes	down	0.0401487	0.0874014	0.102116	0.0541905	0.0763962	0.0726212	0.0765554	0.067736	GSPT1-202	eukaryotic peptide chain release factor GTP-binding subunit ERF3A isoform X1 [Sus scrofa]	XP_020942248.1
Chr03_108758890_108772982	Pig.18781	17.7077	4.1463	0.00843138	0.197619	yes	up	0	0	0	0.015483	0.0555608	0.0508348	0	0.0406262	PARN-202	poly(A)-specific ribonuclease PARN isoform X1 [Sus scrofa]	XP_020942220.1(poly
Chr03_108839582_108909181		0.0322537	-4.95439	0.0221659	0.297531	yes	down	0.0229421	0.0163878	0.0161236	0	0	0	0.0184845	0	#N/A	#N/A	#N/A
Chr03_115528998_115536224	Pig.16763	18.5828	4.21589	0.0433063	1	yes	up	0	0	0	0.0232245	0.0902864	0.0145242	0	0.0426784	GGA2-202	ADP-ribosylation factor-binding protein GGA2 isoform X1 [Sus scrofa]	XP_005656826.1
Chr03_126444700_126447071	Pig.21034	0.440266	-1.18355	0.0131544	0.247417	yes	down	0.172066	0.103789	0.28485	0.185796	0.194463	0.152505	0.186902	0.177588	FBRS-201	probable fibrosin-1 [Sus scrofa]	XP_020942074.1
Chr03_18351705_18377232	Pig.09345	0.0441927	-4.50005	0.00545271	0.156871	yes	down	0.0172066	0.0218503	0	0	0	0	0.013019	0	ATAD2B-201	ATPase family AAA domain-containing protein 2B isoform X1 [Sus scrofa]	XP_020943439.1
Chr03_26074398_26088941	Pig.06706	0.0275368	-5.1825	0.00895294	0.203579	yes	down	0.0229421	0.0382381	0	0	0	0	0.0203934	0	BIRC6-201	LOW QUALITY PROTEIN: baculoviral IAP repeat-containing protein 6 [Sus scrofa]	XP_020943315.1
Chr03_41600843_41603402	Pig.08256	2.00941	1.00677	0.00367137	0.120846	yes	up	0.143388	0.223966	0.306348	0.905756	1.15289	0.915027	0.224567	0.991223	PSME4-202	proteasome activator complex subunit 4 isoform X1 [Sus scrofa]	XP_003125198.5
Chr03_50015679_50034685	Pig.04812	0.0806343	-3.63246	0.0154232	0.264014	yes	down	0	0.0218503	0	0	0	0	0.00728345	0	EHBP1-204	EH domain-binding protein 1 isoform X1 [Sus scrofa]	XP_020943128.1
Chr03_55947278_55955045	Pig.04846	8.63521	3.11023	0.0249891	0.310783	yes	up	0	0	0	0.0232245	0.0138902	0.0217864	0	0.0196337	GFPT1-201	PREDICTED: glutamine--fructose-6-phosphate aminotransferase [isomerizing]	XP_019319554.1
Chr03_5673086_5684674	Pig.15960	3.38134	1.75759	0.00618541	0.163886	yes	up	0.0229421	0.0437007	0.0161236	0.178055	0.145847	0.312271	0.0275888	0.212058	PPM1A-201	LOW QUALITY PROTEIN: protein phosphatase 1B [Sus scrofa]	XP_015997703.1
Chr03_71892828_71898777	Pig.13433	3.74426	1.90468	3.56066e-05	0.00602741	yes	up	0.275305	0.16934	0.40309	1.99731	1.95157	2.96295	0.282578	2.30394	UXS1-201	UDP-glucuronic acid decarboxylase 1 isoform b [Sus scrofa]	NP_001231703.1
Chr03_71892828_71908759	Pig.13433	2.67916	1.42178	0.000127074	0.013915	yes	up	0.395751	0.349606	0.489082	1.85796	2.50024	2.99926	0.41148	2.45248	UXS1-201	UDP-glucuronic acid decarboxylase 1 isoform b [Sus scrofa]	NP_001231703.1
Chr03_75183979_75196214	Pig.13452	0.0528848	-4.241	0.00356759	0.120846	yes	down	0.0172066	0.0163878	0	0	0	0	0.0111981	0	IL1R1-202	interleukin-1 receptor type 1 isoform X1 [Sus scrofa]	XP_013851373.2
Chr03_76049281_76053526	MSTRG.8679,Pig.09469	2.05468	1.03892	0.00109187	0.0554489	yes	up	0.120446	0.191191	0.177359	0.61932	0.812577	0.813358	0.162999	0.748418	#N/A	#N/A	#N/A
Chr03_94657206_94667073	Pig.09232	2.19108	1.13164	0.00712352	0.179383	yes	up	0.0688263	0.092864	0.0806179	0.379334	0.479212	0.326795	0.0807694	0.395114	GTF2I-206	general transcription factor II-I isoform X1 [Sus scrofa]	XP_005662046.1
Chr04_105969655_105988484	Pig.01686,MSTRG.12330	9.52438	3.25163	0.00485869	0.148044	yes	up	0.0286776	0.0163878	0.0268726	0.363851	0.66673	0.501086	0.0239793	0.510556	#N/A	#N/A	#N/A
Chr04_110124557_110134080	Pig.01698	5.78996	2.53355	0.0434325	0.394464	yes	up	0	0	0.0107491	0.0387075	0.062506	0.0363106	0.00358302	0.0458414	TLCD4-RWDD3	transmembrane protein 56 isoform X2 [Sus scrofa]	XP_020945824.1
Chr04_110746736_110758056	Pig.01703,MSTRG.12387	18.9146	4.24143	0.00261657	0.102587	yes	up	0	0	0	0.015483	0.0416706	0.0726212	0	0.0432583	#N/A	#N/A	#N/A
Chr04_110975015_110979306	Pig.01705	0.0622581	-4.00559	0.0173719	0.275626	yes	down	0.011471	0.0163878	0	0	0	0	0.00928627	0	ARHGAP29-201	rho GTPase-activating protein 29 [Sus scrofa]	XP_005663713.1
Chr04_112432957_112452095	Pig.01720	0.0358598	-4.80149	0.00361002	0.120846	yes	down	0.011471	0	0.0429962	0	0	0	0.0181558	0	EVI5-208	ecotropic viral integration site 5 protein homolog isoform X4 [Sus scrofa]	XP_020945870.1
Chr04_117301750_117319079	Pig.01755	0.357894	-1.4824	0.0167321	0.275581	yes	down	0.126181	0.163878	0.128989	0.10064	0.208353	0.0290485	0.139683	0.11268	SH3GLB1-201	endophilin-B1 isoform X1 [Sus scrofa]	XP_005663778.1
Chr04_22743270_22773855	Pig.03771	0.221904	-2.17199	0.000586345	0.0335331	yes	down	0.126181	0.136565	0.0698689	0.0232245	0.145847	0	0.110872	0.0563572	EMC2-201	ER membrane protein complex subunit 2 isoform X4 [Sus scrofa]	XP_020944677.1
Chr04_30299278_30309026	Pig.08107	29.5034	4.88281	0.000482001	0.0287972	yes	up	0	0	0	0.046449	0.104177	0.0508348	0	0.0671535	OXR1-205	oxidation resistance protein 1 isoform X4 [Sus scrofa]	XP_013852007.1
Chr04_36821977_36836417	Pig.01495	3.95339	1.98309	0.000331756	0.0231575	yes	up	0.172066	0.0983266	0.214981	1.21542	1.2779	1.71386	0.161791	1.40239	WWP1-201	NEDD4-like E3 ubiquitin-protein ligase WWP1 isoform X1 [Sus scrofa]	XP_005663042.1
Chr04_42637595_42638483	Pig.01470	0.195515	-2.35465	0.0133581	0.249706	yes	down	0.0229421	0.0382381	0.0214981	0.015483	0.0208353	0	0.0275594	0.0121061	ZBTB10-201	zinc finger and BTB domain-containing protein 10 isoform X1 [Sus scrofa]	XP_001928312.1
Chr04_55472441_55495387		6.04772	2.59639	0.0272685	0.322044	yes	up	0	0.0109252	0	0.077415	0.0277804	0.0435727	0.00364172	0.0495894	#N/A	#N/A	#N/A
Chr04_59194539_59221175	Pig.14064	0.0278591	-5.16571	0.000856146	0.0465835	yes	down	0	0.0382381	0.0268726	0	0	0	0.0217036	0	CHD7-201	chromodomain-helicase-DNA-binding protein 7 isoform X1 [Sus scrofa]	XP_020944993.1
Chr04_64703098_64703528		3.3071	1.72556	0.00571471	0.156871	yes	up	0.0286776	0.0382381	0.0752434	0.441266	0.256969	0.312271	0.0473864	0.336835	#N/A	#N/A	#N/A
Chr04_67550881_67619743	Pig.04920	0.0167922	-5.89607	1.41619e-05	0.00287675	yes	down	0.0172066	0.0710136	0.0161236	0	0	0	0.0347813	0	KIFAP3-201	kinesin-associated protein 3 isoform X2 [Sus scrofa]	XP_001927795.3
Chr04_81477534_81477997	Pig.10515,MSTRG.11588	0.281193	-1.83037	0.0432424	0.394464	yes	down	0.0688263	0.0437007	0.0537453	0	0.062506	0.0435727	0.0554241	0.0353596	#N/A	#N/A	#N/A
Chr04_85539951_85546718	Pig.18355	0.0770481	-3.6981	0.0374233	0.367344	yes	down	0.0229421	0	0	0	0	0	0.00764736	0	RPRD2-201	regulation of nuclear pre-mRNA domain-containing protein 2 isoform X1 [Sus scrofa]	XP_003355246.1
Chr05_11188042_11212141	Pig.07621	0.0607693	-4.04051	0.0304575	0.329749	yes	down	0.0286776	0	0	0	0	0	0.0095592	0	LARP4-202	la-related protein 4 isoform X1 [Sus scrofa]	XP_020947303.1
Chr05_24204646_24215675	Pig.14028	34.8716	5.12398	0.0137443	0.252283	yes	up	0	0	0	0.046449	0.062506	0.130718	0	0.079891	ARFGAP3-201	ADP-ribosylation factor GTPase-activating protein 3 isoform X1 [Sus scrofa]	XP_003481574.1
Chr05_31301375_31326900	Pig.05460	0.19462	-2.36127	0.00756602	0.182965	yes	down	0.0458842	0.0437007	0.0644943	0.030966	0.0347255	0	0.0513597	0.0218972	XPOT-201	exportin-T isoform X1 [Sus scrofa]	XP_020947599.1
Chr05_33008943_33026515	Pig.05474	0.112962	-3.14609	0.0388991	0.372722	yes	down	0	0	0.0161236	0	0	0	0.00537453	0	IRAK3-201	interleukin-1 receptor-associated kinase 3 [Sus scrofa]	XP_020947619.1
Chr05_35383986_35390007		15.9069	3.99158	0.017708	0.275626	yes	up	0	0	0	0.030966	0.0555608	0.0217864	0	0.0361044	#N/A	#N/A	#N/A
Chr05_42398007_42403290	MSTRG.13728,Pig.20735	0.419181	-1.25435	0.0206403	0.289302	yes	down	0.0745618	0.092864	0.0806179	0.0696735	0.0833413	0.0798833	0.0826812	0.0776327	#N/A	#N/A	#N/A
Chr05_42533552_42543182	Pig.20738	5.8815	2.55619	0.0229799	0.303116	yes	up	0	0	0.0214981	0.077415	0.0902864	0.10167	0.00716604	0.0897904	TMEM19-202	PREDICTED: ras-related protein Rab-21 [Felis catus]	XP_003989098.1
Chr05_43684815_43744217	Pig.06613	0.0253457	-5.30212	8.54568e-05	0.0113212	yes	down	0.0344131	0.0109252	0.0268726	0	0	0	0.0240703	0	FGD4	FYVE, RhoGEF and PH domain-containing protein 4 isoform X1 [Sus scrofa]	XP_020947725.1
Chr05_48391369_48407553	Pig.06589	8.33959	3.05998	0.0376145	0.367344	yes	up	0	0	0	0	0.0277804	0.0290485	0	0.018943	ARNTL2-201	aryl hydrocarbon receptor nuclear translocator-like protein 2 isoform X1 [Sus scrofa]	XP_020947810.1
Chr05_49300221_49310929	Pig.06583	6.65357	2.73413	0.00950977	0.205506	yes	up	0	0.0163878	0	0.0851565	0.0833413	0.0798833	0.00546259	0.0827937	ITPR2-202	inositol 1,4,5-trisphosphate receptor type 2 isoform X1 [Sus scrofa]	XP_020948578.1
Chr05_554154_555152	Pig.18444	17.1495	4.1001	0.0288044	1	yes	up	0	0	0	0.0387075	0.0486157	0.0290485	0	0.0387906	XPNPEP3-201	probable Xaa-Pro aminopeptidase 3 isoform X1 [Sus scrofa]	XP_020947124.1
Chr05_60053380_60062312	Pig.09568	2.63024	1.39519	0.0114762	0.23627	yes	up	0.11471	0.185728	0.0429962	0.356109	0.944534	0.835144	0.114478	0.711929	ATF7IP-202	activating transcription factor 7-interacting protein 1 isoform X1 [Sus scrofa]	XP_005664117.1
Chr05_60087028_60091213	Pig.09568	0.261172	-1.93693	0.0234405	0.3049	yes	down	0.0401487	0.0710136	0	0.0541905	0.0138902	0	0.0370541	0.0226936	ATF7IP-202	activating transcription factor 7-interacting protein 1 isoform X1 [Sus scrofa]	XP_005664117.1
Chr05_6091679_6092008		37.0708	5.21221	0.0375684	0.367344	yes	up	0	0	0	0.0696735	0.118067	0.0653591	0	0.0843665	#N/A	#N/A	#N/A
Chr05_66678018_66707603	Pig.07503	0.193651	-2.36847	0.0408766	0.384417	yes	down	0.0172066	0.0163878	0.0161236	0	0.0208353	0	0.0165726	0.00694511	ERC1-203	ELKS/Rab6-interacting/CAST family member 1 isoform X3 [Sus scrofa]	XP_020948632.1
Chr05_93249552_93256413		2.88446	1.5283	0.00432806	0.137371	yes	up	0.0860328	0.136565	0.0644943	0.510939	0.62506	0.762523	0.0956973	0.63284	#N/A	#N/A	#N/A
Chr05_99164719_99181403	MSTRG.14656,Pig.11752	3.26798	1.7084	0.0224397	0.299885	yes	up	0.0172066	0	0.0214981	0.0696735	0.0694511	0.13798	0.0129016	0.0923683	#N/A	#N/A	#N/A
Chr06_10288787_10295546	Pig.14717	0.0834854	-3.58233	0.0305183	0.329749	yes	down	0.011471	0	0.0107491	0	0	0	0.0074067	0	ZYG11B-201	protein zyg-11 homolog B [Sus scrofa]	XP_020952290.1
Chr06_116825520_116839690	Pig.20473	0.0678182	-3.88218	0.00814259	0.192329	yes	down	0.0229421	0.0273129	0.0537453	0.015483	0	0	0.0346668	0.005161	MYH14-201	myosin-14 isoform X2 [Sus scrofa]	XP_020950441.1
Chr06_12677380_12679356	Pig.12446	28.1579	4.81547	0.00561492	0.156871	yes	up	0	0	0	0.077415	0.0833413	0.0290485	0	0.0632683	USP24-201	ubiquitin carboxyl-terminal hydrolase 24 isoform X1 [Sus scrofa]	XP_020953471.1
Chr06_127927287_127934404	Pig.15970	0.148237	-2.75402	0.044427	0.395816	yes	down	0.0688263	0.0163878	0.0161236	0	0.0347255	0	0.0337792	0.0115752	UBA2	PREDICTED: SUMO-activating enzyme subunit 2 [Vicugna pacos]	XP_006217089.1
Chr06_128170774_128185608	Pig.15966	0.323362	-1.62878	0.000349272	0.0231575	yes	down	0.177801	0.180265	0.145112	0.147089	0.152792	0.0653591	0.167726	0.121747	LSM14A-201	protein LSM14 homolog A [Sus scrofa]	NP_001302727.1
Chr06_136692294_136695881		2.50857	1.32687	0.0332918	0.339756	yes	up	0.0573552	0.0327755	0.102116	0.286436	0.243079	0.515611	0.0640823	0.348375	#N/A	#N/A	#N/A
Chr06_139797251_139798870	MSTRG.18233	0.456874	-1.13013	0.0249237	0.310783	yes	down	0.160595	0.185728	0.112865	0.232245	0.152792	0.0871455	0.153063	0.157394	0	0	XP_020949833.1
Chr06_153142885_153154959		0.199336	-2.32673	0.0445726	0.395956	yes	down	0.0172066	0.0109252	0.0376217	0	0.0277804	0	0.0219178	0.00926014	#N/A	#N/A	#N/A
Chr06_160725112_160742417	Pig.15713	0.295521	-1.75867	0.0447544	0.396414	yes	down	0.0229421	0.0327755	0.0107491	0.030966	0.0138902	0	0.0221556	0.0149521	CFDP1-201	craniofacial development protein 1 [Sus scrofa]	XP_020949434.1
Chr06_168400991_168401622		29.7628	4.89544	0.0183656	0.27703	yes	up	0	0	0	0.0541905	0.0763962	0.0726212	0	0.067736	#N/A	#N/A	#N/A
Chr06_20465710_20482544		0.200946	-2.31512	0.000236792	0.0192253	yes	down	0.0688263	0.065551	0.0591198	0.0232245	0.0416706	0.0217864	0.064499	0.0288938	#N/A	#N/A	#N/A
Chr06_2663266_2674494	Pig.12657	2.54811	1.34943	0.0324039	0.336533	yes	up	0.0286776	0	0.0859925	0.170313	0.201408	0.246912	0.0382234	0.206211	ERI3-203	ERI1 exoribonuclease 3 isoform X1 [Sus scrofa]	XP_020952446.1
Chr06_27510977_27516672	Pig.05292	4.65714	2.21944	0.0152947	0.26364	yes	up	0	0.0109252	0.0107491	0.0541905	0.0347255	0.13798	0.00722474	0.0756321	ANKRD13C-203	ankyrin repeat domain-containing protein 13C [Sus scrofa]	XP_003127975.1
Chr06_32614019_32620129	Pig.05306	0.124501	-3.00577	0.0461819	0.40377	yes	down	0.0286776	0.0109252	0.0107491	0	0.0138902	0	0.0167839	0.00463007	ACADM-205	RecName: Full=Medium-chain specific acyl-CoA dehydrogenase, mitochondrial; Short=MCAD; Flags: PrecursorAAW30430.1 medium-chain acyl-coA dehydrogenase [Sus scrofa]	P41367.3
Chr06_34537471_34546764		0.186078	-2.42602	0.000239765	0.0192253	yes	down	0.0688263	0.180265	0.0322472	0.030966	0.0763962	0.0145242	0.0937796	0.0406288	#N/A	#N/A	#N/A
Chr06_34705428_34718642	Pig.02743	15.1101	3.91745	0.0276873	1	yes	up	0	0	0	0.0387075	0.0416706	0.0217864	0	0.0340548	MIGA1-201	mitoguardin 1 [Sus scrofa]	XP_003356470.3
Chr06_40375921_40376408		2.73354	1.45077	0.0317995	0.332965	yes	up	0.172066	0.0600885	0.198858	0.534164	0.902864	1.15468	0.143671	0.863902	#N/A	#N/A	#N/A
Chr06_49238260_49238933	Pig.02789	3.00935	1.58945	0.03613	0.359765	yes	up	0	0.0273129	0.0107491	0.170313	0.0555608	0.0290485	0.0126873	0.0849741	KIAA1328-202	protein hinderin isoform X5 [Sus scrofa]	XP_020951945.1
Chr06_49667205_49680000	Pig.02792	3.98695	1.99528	0.0179153	0.275626	yes	up	0.0401487	0.0546259	0.0591198	0.294177	0.763962	0.319533	0.0512981	0.459224	FHOD3-206	FH1/FH2 domain-containing protein 3 isoform X2 [Sus scrofa]	XP_020951933.1
Chr06_54582009_54601840	Pig.03599	0.0455977	-4.4549	0.0377625	1	yes	down	0.0286776	0	0.0107491	0	0	0	0.0131422	0	TRAPPC8-201	trafficking protein particle complex subunit 8 isoform X1 [Sus scrofa]	XP_020951870.1
Chr06_54582012_54601840	Pig.03599	0.260947	-1.93817	0.00648481	0.168882	yes	down	0.108975	0.0327755	0.0859925	0.046449	0.0555608	0.0290485	0.0759143	0.0436861	TRAPPC8-201	trafficking protein particle complex subunit 8 isoform X1 [Sus scrofa]	XP_020951870.1
Chr06_63650554_63691247		10.7544	3.42686	0.0316491	0.332533	yes	up	0	0	0	0.0232245	0.0208353	0.0290485	0	0.0243694	#N/A	#N/A	#N/A
Chr06_75473544_75484018	Pig.02961	18.9224	4.24202	0.00562892	0.156871	yes	up	0	0	0	0.030966	0.0763962	0.0217864	0	0.0430495	MACF1-201	PREDICTED: microtubule-actin cross-linking factor 1, isoforms 1/2/3/5 isoform X6 [Balaenoptera acutorostrata scammoni]	XP_029086933.1
Chr06_79153469_79156262	Pig.03010	0.0978871	-3.35274	8.50098e-09	6.47562e-06	yes	down	0.223685	0.311367	0.252603	0.0541905	0.104177	0.0145242	0.262552	0.0576304	ZMYM4-201	zinc finger MYM-type protein 4 isoform X2 [Sus scrofa]	XP_020951559.1
Chr06_81552679_81556789		0.42936	-1.21974	0.0180495	0.275626	yes	down	0.0688263	0.0874014	0.0376217	0.046449	0.062506	0.0798833	0.0646164	0.0629461	#N/A	#N/A	#N/A
Chr06_83054379_83069199	Pig.03076	12.0738	3.59381	0.0322342	0.336361	yes	up	0	0	0	0.030966	0	0.0508348	0	0.027267	PUM1-201	pumilio homolog 1 isoform X17 [Sus scrofa]	XP_020951410.1
Chr06_84760516_84766217	Pig.03089	0.189599	-2.39897	0.00859724	0.198453	yes	down	0.0516197	0.0327755	0.0322472	0	0.0277804	0.0217864	0.0388808	0.0165223	EPB41-201	protein 4.1 isoform X1 [Sus scrofa]	XP_020951347.1
Chr06_86668446_86672730	Pig.03134	0.461717	-1.11492	0.000469675	0.028622	yes	down	0.183537	0.213041	0.333221	0.239987	0.180573	0.319533	0.243266	0.246698	ARID1A-201	AT-rich interactive domain-containing protein 1A isoform X1 [Sus scrofa]	XP_020951289.1
Chr06_9306511_9324795	Pig.14732	18.9704	4.24568	0.00926474	0.203832	yes	up	0	0	0	0.0232245	0.0416706	0.0653591	0	0.0434181	OSBPL9-202	oxysterol-binding protein-related protein 9 isoform X1 [Sus scrofa]	XP_005665492.2
Chr06_98861647_98869027		0.148831	-2.74826	0.00118482	0.0579282	yes	down	0.0458842	0.065551	0.0859925	0	0	0.0653591	0.0658092	0.0217864	#N/A	#N/A	#N/A
Chr07_10942910_10950805	Pig.13812,MSTRG.19250	0.0387261	-4.69055	0.00552177	0.156871	yes	down	0	0.0437007	0	0	0	0	0.0145669	0	#N/A	#N/A	#N/A
Chr07_109969272_109992959	Pig.09261	38.2867	5.25877	0.00177861	0.0774203	yes	up	0	0	0	0.116123	0.0972315	0.0435727	0	0.0856422	ADGRF5-201	LOW QUALITY PROTEIN: adhesion G protein-coupled receptor F5 [Sus scrofa]	XP_013833469.2
Chr07_123110937_123127062		0.155288	-2.68698	0.0414664	0.387171	yes	down	0.0401487	0.0273129	0.0322472	0	0.0347255	0	0.0332363	0.0115752	#N/A	#N/A	#N/A
Chr07_127317226_127327861	Pig.11473	0.007258	-7.10621	5.04712e-05	0.00768928	yes	down	0.11471	0.065551	0.0644943	0	0	0	0.0815853	0	Tnxb	tenascin-X isoform X5 [Sus scrofa]	XP_020953995.1
Chr07_127317226_127328596	Pig.11473	0.282252	-1.82494	0.0406521	0.384417	yes	down	0.0401487	0.131102	0.139738	0.077415	0.0486157	0.0653591	0.103663	0.0637966	Tnxb	tenascin-X isoform X5 [Sus scrofa]	XP_020953995.1
Chr07_127317226_127334618	Pig.11473	106.363	6.73286	0.0198478	0.285266	yes	up	0	0	0	0.325143	0	0.384892	0	0.236678	Tnxb	tenascin-X isoform X5 [Sus scrofa]	XP_020953995.1
Chr07_35429135_35449112	MSTRG.19801	6.84181e-11	-33.7668	3.58511e-23	1.09238e-19	yes	down	0.0286776	0	0	0	0	0	0.0095592	0	0	0	XP_001928879.1
Chr07_39050929_39057012	Pig.12037	23.1816	4.53491	0.0276231	1	yes	up	0	0	0	0.0387075	0.0763962	0.0435727	0	0.0528921	TTC7B-201	tetratricopeptide repeat protein 7B isoform X1 [Sus scrofa]	XP_020955264.1
Chr07_40988315_41008484	MSTRG.19933,Pig.12022	3.18179	1.66984	0.0193303	0.282357	yes	up	0.0172066	0.0163878	0.0322472	0.139347	0.131957	0.188815	0.0219472	0.153373	#N/A	#N/A	#N/A
Chr07_48628963_48631010	Pig.08878	2.14789	1.10292	0.0466449	0.40377	yes	up	0.11471	0.142027	0.198858	0.658028	0.569499	0.922289	0.151865	0.716605	CEP128-201	centrosomal protein of 128 kDa isoform X4 [Sus scrofa]	XP_020955223.1
Chr07_55478562_55481505	Pig.04355	0.0333375	-4.90671	0.0251233	1	yes	down	0.0344131	0.0163878	0	0	0	0	0.0169336	0	RBM25-201	RNA binding motif protein 25, isoform CRA_d [Homo sapiens]	XP_005666396.1
Chr07_65935765_65967456	MSTRG.20331,Pig.04276	0.061497	-4.02334	0.0260278	0.317226	yes	down	0.0172066	0.0109252	0	0	0	0	0.00937725	0	#N/A	#N/A	#N/A
Chr07_65935765_65977597	MSTRG.20331,Pig.04276	0.0118416	-6.39999	8.74908e-07	0.000380835	yes	down	0.0229421	0.0710136	0.0591198	0	0	0	0.0510252	0	#N/A	#N/A	#N/A
Chr07_66020931_66031992	Pig.04276	5.22749	2.38612	0.0244351	0.308021	yes	up	0.0172066	0	0	0.061932	0.0694511	0.0653591	0.00573552	0.0655807	CHD2	chromodomain-helicase-DNA-binding protein 2 isoform X1 [Sus scrofa]	XP_013833723.1
Chr07_78284059_78313084	MSTRG.20541	0.003565	-8.13188	0.00257874	0.102587	yes	down	1.75507	1.98292	0.365468	0	0.0138902	0.0217864	1.36782	0.0118922	0	0	XP_020954893.1
Chr07_88762220_88762547	Pig.08431	2.25949	1.17599	0.000313712	0.0231575	yes	up	0.149124	0.114714	0.204232	0.596096	0.847303	0.893241	0.156023	0.77888	SNX6-202	sorting nexin-6 [Sus scrofa]	NP_001231145.1
Chr07_88769017_88792416	Pig.08431	0.0472343	-4.40402	0.00683068	0.1749	yes	down	0.0229421	0	0.0161236	0	0	0	0.0130219	0	SNX6-202	sorting nexin-6 [Sus scrofa]	NP_001231145.1
Chr07_88781142_88792416	Pig.08431	0.043254	-4.53102	0.0160001	1	yes	down	0.0172066	0	0.0268726	0	0	0	0.0146931	0	SNX6-202	sorting nexin-6 [Sus scrofa]	NP_001231145.1
Chr08_115962710_115977373	Pig.00658	2.73461	1.45133	0.0316404	0.332533	yes	up	0.011471	0.0218503	0.0214981	0.131606	0.0555608	0.145242	0.0182732	0.110803	HADH-202	hydroxyacyl-coenzyme A dehydrogenase, mitochondrial precursor [Sus scrofa]	NP_999496.1
Chr08_138698753_138701503	Pig.00533	0.0843351	-3.56772	0.0423026	0.389414	yes	down	0	0.0109252	0.0107491	0	0	0	0.00722474	0	RASGEF1B-201	ras-GEF domain-containing family member 1B isoform X2 [Sus scrofa]	XP_020955964.1
Chr08_16180452_16186784		13.0897	3.71036	0.011987	0.239269	yes	up	0	0	0	0.0387075	0.0208353	0.0290485	0	0.0295304	#N/A	#N/A	#N/A
Chr08_20846343_20878523	Pig.16697	2.04163	1.02972	0.0290244	0.32672	yes	up	0.0344131	0.0437007	0.0322472	0.147089	0.159737	0.196077	0.036787	0.167634	DCUN1D4-201	PREDICTED: DCN1-like protein 4 isoform X3 [Ceratotherium simum simum]	XP_004419114.1
Chr08_21598432_21612832	Pig.16690	0.332629	-1.58801	0.0147862	0.261441	yes	down	0.0688263	0.0546259	0.0752434	0.046449	0.0277804	0.0726212	0.0662318	0.0489502	SLAIN2-201	SLAIN motif-containing protein 2 isoform X1 [Sus scrofa]	XP_005666692.1
Chr08_28917574_28923061	Pig.07260	14.0955	3.81716	0.0177171	0.275626	yes	up	0	0	0	0.0387075	0.0347255	0.0217864	0	0.0317398	PDS5A-201	PREDICTED: sister chromatid cohesion protein PDS5 homolog A isoform X2 [Equus asinus]	XP_014712699.1
Chr08_28917574_28926864	Pig.07260	11.765	3.55643	0.0213329	0.293117	yes	up	0	0	0	0.0232245	0.0277804	0.0290485	0	0.0266845	PDS5A-201	PREDICTED: sister chromatid cohesion protein PDS5 homolog A isoform X2 [Equus asinus]	XP_014712699.1
Chr08_67440824_67447492		19.0601	4.25248	0.00321848	0.115373	yes	up	0	0	0	0.0232245	0.0347255	0.0726212	0	0.0435237	#N/A	#N/A	#N/A
Chr08_73010185_73015011	Pig.08348	2.09747	1.06865	0.0366734	0.362459	yes	up	0.183537	0.0874014	0.134363	0.603837	0.493102	0.798833	0.1351	0.631924	SDAD1-201	protein SDA1 homolog isoform X1 [Sus scrofa]	XP_003129136.1
Chr08_82362096_82402170	Pig.01089	7.50512	2.90787	0.0302188	0.329749	yes	up	0.0229421	0.0109252	0	0.0541905	0.270859	0.283223	0.0112891	0.202757	ARHGAP10-201	rho GTPase-activating protein 10 isoform X1 [Sus scrofa]	XP_020956318.1
Chr09_109155145_109193076	Pig.11684	0.299558	-1.73909	0.0194935	0.282357	yes	down	0.0458842	0.0546259	0.0429962	0.046449	0.0138902	0.0363106	0.0478354	0.0322166	PICALM-207	phosphatidylinositol-binding clathrin assembly protein isoform X6 [Sus scrofa]	XP_020957732.1
Chr09_109163680_109193076	Pig.11684	0.466401	-1.10036	0.0282003	0.324778	yes	down	0.137653	0.136565	0.107491	0.108381	0.250024	0.0435727	0.127236	0.133993	PICALM-207	phosphatidylinositol-binding clathrin assembly protein isoform X6 [Sus scrofa]	XP_020957732.1
Chr09_109165747_109193076	Pig.11684	0.416854	-1.26239	0.00358553	0.120846	yes	down	0.154859	0.120177	0.161236	0.116123	0.236134	0.0508348	0.145424	0.134364	PICALM-207	phosphatidylinositol-binding clathrin assembly protein isoform X6 [Sus scrofa]	XP_020957732.1
Chr09_109177641_109208969	Pig.11684	12.327	3.62375	0.0283019	1	yes	up	0	0	0	0.0541905	0.0277804	0	0	0.0273236	PICALM-207	phosphatidylinositol-binding clathrin assembly protein isoform X6 [Sus scrofa]	XP_020957732.1
Chr09_109408178_109421667	Pig.11683	0.0434752	-4.52366	0.0351615	1	yes	down	0.011471	0.0273129	0	0	0	0	0.012928	0	EED-201	polycomb protein EED isoform X1 [Sus scrofa]	XP_003482629.1
Chr09_125742234_125752925	Pig.12876	3.63655	1.86257	0.0293027	0.32672	yes	up	0.0286776	0.0163878	0.0537453	0.162572	0.256969	0.363106	0.0329369	0.260882	RAB6A-201	PREDICTED: ras-related protein Rab-6A isoform X1 [Oryctolagus cuniculus]	XP_002708751.1
Chr09_126761252_126807052	Pig.12861	2.06462	1.04587	0.0360588	0.359765	yes	up	0.0630907	0.0437007	0.0752434	0.317402	0.187518	0.319533	0.0606783	0.274818	RNF169-201	E3 ubiquitin-protein ligase RNF169 [Sus scrofa]	XP_020918163.1
Chr09_131363257_131386887		3.36262	1.74959	0.0239157	0.3049	yes	up	0.0344131	0.0109252	0.0591198	0.224504	0.284749	0.246912	0.0348194	0.252055	#N/A	#N/A	#N/A
Chr09_16522266_16542844	Pig.04694	20.7149	4.3726	0.0091683	0.203832	yes	up	0	0	0	0.0232245	0.0902864	0.0290485	0	0.0475198	CEP350	LOW QUALITY PROTEIN: centrosome-associated protein 350 [Sus scrofa]	XP_020919409.1
Chr09_16530586_16542844	Pig.04694	0.492418	-1.02204	0.0463033	0.40377	yes	down	0.11471	0.0983266	0.134363	0.139347	0.194463	0.0435727	0.1158	0.125794	CEP350	LOW QUALITY PROTEIN: centrosome-associated protein 350 [Sus scrofa]	XP_020919409.1
Chr09_17271933_17273563	Pig.04684	33.0861	5.04815	0.00502375	1	yes	up	0	0	0	0.0541905	0.0486157	0.123456	0	0.0754208	ABL2-205	Abelson tyrosine-protein kinase 2 isoform X5 [Sus scrofa]	XP_003482779.2
Chr09_20146396_20162610	Pig.04669	8.08066	3.01447	0.0204537	0.289302	yes	up	0	0.0163878	0	0.108381	0.104177	0.0944076	0.00546259	0.102322	COP1-203	E3 ubiquitin-protein ligase RFWD2 isoform X1 [Sus scrofa]	XP_020919333.1
Chr09_23271876_23286452	Pig.04645	0.347252	-1.52595	0.0300452	0.329749	yes	down	0.0229421	0.0600885	0.0161236	0	0.0555608	0.0217864	0.0330514	0.0257824	SUCO-201	LOW QUALITY PROTEIN: SUN domain-containing ossification factor [Sus scrofa]	XP_003357586.3
Chr09_49973631_49975568		0.168163	-2.57206	0.0130983	0.247417	yes	down	0.0573552	0.0218503	0.0322472	0	0.0416706	0	0.0371509	0.0138902	#N/A	#N/A	#N/A
Chr09_65616254_65623717	Pig.00428	2.17936	1.1239	0.00709212	0.179383	yes	up	0.0802973	0.103789	0.11824	0.456749	0.430597	0.573708	0.100775	0.487018	VPS50-201	syndetin isoform X1 [Sus scrofa]	XP_020958043.1
Chr09_66558827_66565923	MSTRG.24574,Pig.00439	2.86529	1.51868	0.00500764	0.149591	yes	up	0.0745618	0.0764762	0.0591198	0.356109	0.541718	0.464776	0.0700526	0.454201	#N/A	#N/A	#N/A
Chr09_8107518_8117610	Pig.14368	0.44247	-1.17635	0.0121464	0.239269	yes	down	0.0688263	0.092864	0.0752434	0.0851565	0.062506	0.0871455	0.0789779	0.0782693	LPGAT1-201	acyl-CoA:lysophosphatidylglycerol acyltransferase 1 [Sus scrofa]	XP_003357646.2
Chr10_14474_14833		3.85471	1.94662	0.0100227	0.212078	yes	up	0.0516197	0.0163878	0.0698689	0.294177	0.500048	0.363106	0.0459588	0.385777	#N/A	#N/A	#N/A
Chr10_16252337_16255697		0.185103	-2.4336	0.0284498	0.325529	yes	down	0.0630907	0.136565	0.134363	0.0387075	0.0694511	0.0290485	0.11134	0.0457357	#N/A	#N/A	#N/A
Chr10_22671725_22673756	Pig.11154	36.3747	5.18486	0.00986679	1	yes	up	0	0	0	0.061932	0.0486157	0.13798	0	0.0828427	TGFB2-201	transforming growth factor beta-2 isoform X1 [Sus scrofa]	XP_020919953.1
Chr10_34281541_34341728		0.131955	-2.92188	0.00119773	0.0579282	yes	down	0.0630907	0.0819388	0.0161236	0	0.0347255	0.0145242	0.0537177	0.0164166	#N/A	#N/A	#N/A
Chr10_57648307_57658438	Pig.13793	13.2665	3.72972	0.0135128	0.251058	yes	up	0	0	0	0.046449	0.0138902	0.0290485	0	0.0297959	FAM171A1-201	protein FAM171A1 isoform X1 [Sus scrofa]	XP_003130784.4
Chr10_58190961_58205038	Pig.13795	2.39179	1.25809	4.25467e-05	0.00682314	yes	up	0.246627	0.311367	0.419213	1.56378	1.9099	1.67755	0.325736	1.71708	MINDY3-201	ubiquitin carboxyl-terminal hydrolase MINDY-3 isoform X1 [Sus scrofa]	XP_003130783.1
Chr10_61841725_61864145	Pig.05022	2.85564	1.51381	0.0158572	0.268417	yes	up	0.011471	0	0.0376217	0.116123	0.118067	0.0726212	0.0163642	0.10227	ARHGAP12-201	rho GTPase-activating protein 12 isoform X5 [Sus scrofa]	XP_013835673.1
Chr10_62136486_62138950	Pig.05023	15.5587	3.95965	0.00114869	0.0573781	yes	up	0	0	0.0107491	0.131606	0.0555608	0.181553	0.00358302	0.122906	ZEB1-201	LOW QUALITY PROTEIN: zinc finger E-box-binding homeobox 1 [Sus scrofa]	XP_020919855.1
Chr10_71673526_71683181	MSTRG.27025,Pig.05070	0.415065	-1.26859	0.038424	0.3705	yes	down	0.0401487	0.0382381	0.0806179	0.0232245	0.0486157	0.0726212	0.0530016	0.0481538	#N/A	#N/A	#N/A
Chr10_71673526_71700050	MSTRG.27025	0.43627	-1.19671	0.0275087	0.322707	yes	down	0.0630907	0.0327755	0.0537453	0.030966	0.0763962	0.0363106	0.0498705	0.0478909	0	0	XP_020920352.1
Chr10_79750648_79751650	Pig.09964,MSTRG.27211	4.46504	2.15867	0.000170998	0.015254	yes	up	0.011471	0.0163878	0.0483708	0.201279	0.305585	0.23965	0.0254099	0.248838	#N/A	#N/A	#N/A
Chr11_12201402_12205677	Pig.03511	2.32179	1.21524	1.58035e-06	0.000535037	yes	up	0.315454	0.196653	0.612696	1.39347	2.27799	1.99708	0.374934	1.88952	PAN3-201	PAB-dependent poly(A)-specific ribonuclease subunit PAN3 isoform X1 [Sus scrofa]	XP_005668351.1
Chr11_12201402_12222536	Pig.03511	2.12638	1.0884	0.0286917	0.325529	yes	up	0.0344131	0.0382381	0.0376217	0.147089	0.222243	0.152505	0.0367576	0.173945	PAN3-201	PAB-dependent poly(A)-specific ribonuclease subunit PAN3 isoform X1 [Sus scrofa]	XP_005668351.1
Chr11_25492746_25493528		6.79347	2.76415	0.0238527	0.3049	yes	up	0	0.0163878	0	0.046449	0.0833413	0.130718	0.00546259	0.0868362	#N/A	#N/A	#N/A
Chr11_26031533_26052711	Pig.16494	0.0768163	-3.70244	0.0293801	0.32672	yes	down	0.0229421	0.0273129	0.0322472	0	0.0138902	0	0.0275007	0.00463007	RB1-201	retinoblastoma-associated protein [Sus scrofa]	NP_001272896.1
Chr11_29171746_29198981		0.0834884	-3.58228	0.0173104	0.275626	yes	down	0	0.0109252	0.0107491	0	0	0	0.00722474	0	#N/A	#N/A	#N/A
Chr11_34579623_34579988	Pig.07349	19.032	4.25036	0.0236651	0.3049	yes	up	0	0	0	0.077415	0.0486157	0	0	0.0420103	PCDH17-201	protocadherin-17 isoform X1 [Sus scrofa]	XP_020921306.1
Chr11_4643518_4687351		3.28188	1.71452	0.00425022	0.137031	yes	up	0.0229421	0.0163878	0.0376217	0.131606	0.215298	0.210602	0.0256505	0.185835	#N/A	#N/A	#N/A
Chr11_50455535_50541934	Pig.04491	12.0798	3.59452	0.0172272	0.275626	yes	up	0	0	0	0.0387075	0.0138902	0.0290485	0	0.0272154	KLF12-202	PREDICTED: Krueppel-like factor 12 [Orycteropus afer afer]	XP_007946493.1
Chr11_50504248_50541934	Pig.04491	12.8551	3.68427	0.00929856	0.203832	yes	up	0	0	0	0.0232245	0.0208353	0.0435727	0	0.0292108	KLF12-202	PREDICTED: Krueppel-like factor 12 [Orycteropus afer afer]	XP_007946493.1
Chr11_52476173_52507914	Pig.04496	0.282571	-1.82332	0.00548686	0.156871	yes	down	0.825915	1.04335	0.816928	0.642545	0.729236	0.334058	0.895399	0.568613	LMO7-201	LIM domain only protein 7 isoform X1 [Sus scrofa]	XP_020921337.1
Chr11_55174834_55186268	Pig.04507	0.200224	-2.32031	0.000135405	0.0142269	yes	down	0.0516197	0.065551	0.0967415	0.0232245	0.0416706	0.0290485	0.0713041	0.0313145	OBI1-201	RING finger protein 219 isoform X1 [Sus scrofa]	XP_003131086.3
Chr11_56028794_56032206	Pig.04511	4.41109	2.14113	4.71393e-09	4.78778e-06	yes	up	0.149124	0.163878	0.338595	1.3238	1.54876	3.4132	0.217199	2.09525	NDFIP2-202	NEDD4 family-interacting protein 2 [Sus scrofa]	XP_001926612.1
Chr11_56028794_56037997	Pig.04511	4.81511	2.26757	3.38583e-06	0.00103166	yes	up	0.0630907	0.0600885	0.134363	0.735443	0.68062	1.2854	0.0858475	0.900486	NDFIP2-202	NEDD4 family-interacting protein 2 [Sus scrofa]	XP_001926612.1
Chr11_56028794_56044515	Pig.04511	8.41981	3.07379	0.0315902	0.332533	yes	up	0	0	0	0	0.0138902	0.0435727	0	0.0191543	NDFIP2-202	NEDD4 family-interacting protein 2 [Sus scrofa]	XP_001926612.1
Chr11_56028794_56048891	Pig.04511	3.26813	1.70846	0.0380281	0.369018	yes	up	0.0172066	0	0.0161236	0.046449	0.0694511	0.123456	0.0111101	0.0797854	NDFIP2-202	NEDD4 family-interacting protein 2 [Sus scrofa]	XP_001926612.1
Chr11_76033061_76067275	Pig.07939	14.9985	3.90674	0.0190892	1	yes	up	0	0	0	0.030966	0.0347255	0.0363106	0	0.0340007	PCCA-204	propionyl-CoA carboxylase alpha chain, mitochondrial isoform X1 [Sus scrofa]	XP_020921525.1
Chr12_11806957_11891592	MSTRG.28723	0.309413	-1.69239	0.0392826	0.373984	yes	down	102.58	120.499	97.1285	92.898	57.8597	70.6023	106.736	73.7867	0	0	XP_020921875.1
Chr12_15327650_15371282	Pig.18677,MSTRG.28969	0.0926408	-3.43221	0.00443375	0.138127	yes	down	0	0.0491633	0.0214981	0.015483	0	0	0.0235538	0.005161	#N/A	#N/A	#N/A
Chr12_21007643_21024830	Pig.11860	2.29397	1.19784	0.00208676	0.0871007	yes	up	0.252363	0.196653	0.306348	1.02188	1.25706	1.56136	0.251788	1.2801	SSH1-201	LOW QUALITY PROTEIN: protein phosphatase Slingshot homolog 2 [Sus scrofa]	XP_020923177.1
Chr12_23157554_23175557	Pig.11810	0.250806	-1.99536	0.00682805	0.1749	yes	down	0.0516197	0.0218503	0.0322472	0.030966	0.0138902	0.0145242	0.0352391	0.0197935	NF1-201	LOW QUALITY PROTEIN: neurofibromin [Sus scrofa]	XP_017919758.1
Chr12_27312206_27315092	MSTRG.29412	1.47498e-08	-26.0147	4.43882e-08	2.25418e-05	yes	down	2.00743	0	1.88109	0	0	0	1.29617	0	0	0	XP_020923050.1
Chr12_27312206_27323763	MSTRG.29412,Pig.11225	9.10751e+06	23.1186	0.000420093	0.0261229	yes	up	0	0	0	2.56244	0	0	0	0.854146	#N/A	#N/A	#N/A
Chr12_27312206_27340379	MSTRG.29412	6.20031e-08	-23.9431	1.24334e-08	7.57693e-06	yes	down	0	0.693748	0	0	0	0	0.231249	0	0	0	XP_020923050.1
Chr12_28082367_28086865	Pig.11217	7.21023	2.85005	0.0121077	0.239269	yes	up	0	0	0.0107491	0.123864	0.0138902	0.0363106	0.00358302	0.0580216	ACACA-203	acetyl-CoA carboxylase 1 isoform X1 [Sus scrofa]	XP_020921886.1
Chr12_30652472_30683029	Pig.11189	0.189655	-2.39855	0.0422082	0.389414	yes	down	0.0286776	0.0109252	0.0107491	0	0.0208353	0	0.0167839	0.00694511	RPS6KB1-203	ribosomal protein S6 kinase beta-1 isoform X1 [Sus scrofa]	XP_003131719.1
Chr12_32551425_32554892		4.95255	2.30817	0.0163862	0.271352	yes	up	0.011471	0.0109252	0.0161236	0.15483	0.0972315	0.167029	0.0128399	0.139697	#N/A	#N/A	#N/A
Chr12_34756374_34763751	Pig.13398	0.0546157	-4.19454	0.00763178	0.183103	yes	down	0.011471	0.0109252	0.0107491	0	0	0	0.0110484	0	PCTP	phosphatidylcholine transfer protein isoform X1 [Sus scrofa]	XP_020922913.1
Chr12_40853263_40853381	MSTRG.29689	0.221924	-2.17186	0.00990821	0.212078	yes	down	0.103239	0.131102	0.0806179	0.092898	0.0347255	0.0290485	0.104986	0.052224	0	0	OWK14899.1
Chr12_48468550_48486979		0.0782454	-3.67585	0.0434985	0.394464	yes	down	0	0.0218503	0	0	0	0	0.00728345	0	#N/A	#N/A	#N/A
Chr12_48595782_48605968	Pig.19046	0.367164	-1.4455	0.0343965	0.34704	yes	down	0.108975	0.152952	0.188109	0.147089	0.0694511	0.145242	0.150012	0.120594	EZH1-201	histone-lysine N-methyltransferase EZH1 [Sus scrofa]	NP_001230135.1
Chr12_56004263_56093033		0.0185937	-5.74904	0.0018298	0.077436	yes	down	0.0573552	0.0163878	0.0214981	0	0	0	0.031747	0	#N/A	#N/A	#N/A
Chr12_6060022_6064248	Pig.19289	0.264061	-1.92105	0.000822958	0.0455918	yes	down	0.195008	0.114714	0.182734	0.0851565	0.159737	0.0435727	0.164152	0.0961556	NCOR1	LOW QUALITY PROTEIN: nuclear receptor corepressor 1 [Sus scrofa]	XP_020921950.1
Chr12_6060022_6072546	Pig.19289	0.0616112	-4.02066	0.0300292	0.329749	yes	down	0.011471	0.0163878	0	0	0	0	0.00928627	0	NCOR1	LOW QUALITY PROTEIN: nuclear receptor corepressor 1 [Sus scrofa]	XP_020921950.1
Chr12_6061278_6072546	Pig.19289	0.119957	-3.05942	0.0352436	0.354413	yes	down	0.0286776	0.0273129	0.0214981	0	0.0208353	0	0.0258296	0.00694511	NCOR1	LOW QUALITY PROTEIN: nuclear receptor corepressor 1 [Sus scrofa]	XP_020921950.1
Chr12_6974079_7002516		5.585	2.48156	0.0030463	0.11272	yes	up	0.0286776	0	0	0.15483	0.0416706	0.152505	0.0095592	0.116335	#N/A	#N/A	#N/A
Chr12_6998922_7002516		5.53463	2.46849	0.0205915	0.289302	yes	up	0	0.0163878	0	0.131606	0.0138902	0.058097	0.00546259	0.0678642	#N/A	#N/A	#N/A
Chr13_101290645_101300295	Pig.06518	0.051213	-4.28735	0.0120814	0.239269	yes	down	0.0229421	0.0109252	0	0	0	0	0.0112891	0	MAP3K13-201	mitogen-activated protein kinase kinase kinase 13 [Sus scrofa]	XP_020925639.1
Chr13_10234909_10246104		0.462486	-1.11252	1.00817e-06	0.000383987	yes	down	2.51216	2.72037	2.91299	2.65533	3.50728	2.244	2.71517	2.8022	#N/A	#N/A	#N/A
Chr13_10234909_10274147		0.251714	-1.99014	0.0212566	0.293117	yes	down	0.0286776	0.0273129	0.0806179	0.030966	0.0208353	0.0217864	0.0455362	0.0245292	#N/A	#N/A	#N/A
Chr13_10234909_10309163		0.196178	-2.34976	0.00148726	0.0676971	yes	down	0.0344131	0.0546259	0.0644943	0.030966	0	0.0363106	0.0511778	0.0224255	#N/A	#N/A	#N/A
Chr13_10327454_10331181	Pig.15846	2.0812	1.05742	0.0493174	0.423296	yes	up	0.0286776	0.0382381	0.0537453	0.170313	0.173628	0.210602	0.0402203	0.184847	RBM6-201	RNA-binding protein 6 isoform X1 [Sus scrofa]	XP_003483235.1
Chr13_10429524_10429861	Pig.15844	0.0559079	-4.16081	0.02141	0.293117	yes	down	0.0172066	0	0.0161236	0	0	0	0.0111101	0	SEMA3F-201	semaphorin-3F isoform X1 [Sus scrofa]	XP_001925178.2
Chr13_110968727_110983363	Pig.15072	0.248831	-2.00676	0.0125776	0.241031	yes	down	0.0344131	0.0327755	0.0483708	0	0.062506	0	0.0385198	0.0208353	DLG1-202	disks large homolog 1 isoform X1 [Sus scrofa]	XP_020925751.1
Chr13_118655899_118671264	Pig.02138	0.0792145	-3.65809	0.0262072	0.317995	yes	down	0	0.0218503	0	0	0	0	0.00728345	0	GSK3B-201	PREDICTED: glycogen synthase kinase-3 beta isoform X1 [Ailuropoda melanoleuca]	XP_020923841.1
Chr13_12812644_12829260		21.5315	4.42838	0.0315115	0.332533	yes	up	0	0	0	0.046449	0.0416706	0.058097	0	0.0487389	#N/A	#N/A	#N/A
Chr13_136564587_136572263	MSTRG.32673,Pig.00868	0.0941842	-3.40837	0.0190266	0.282357	yes	down	0.0286776	0.0273129	0.0107491	0	0	0.0145242	0.0222465	0.00484141	#N/A	#N/A	#N/A
Chr13_145325406_145366306	Pig.00946	0.0325664	-4.94047	0.000594286	0.0335331	yes	down	0.0229421	0.0163878	0.0161236	0	0	0	0.0184845	0	ARL13B-201	ADP-ribosylation factor-like protein 13B isoform X2 [Sus scrofa]	XP_020926391.1
Chr13_1453412_1456629	MSTRG.30515	0.320214	-1.64289	0.018636	0.279724	yes	down	0.0516197	0.180265	0.161236	0.0851565	0.0486157	0.145242	0.13104	0.0930049	0	0	NP_001137400.1
Chr13_153304760_153311960	Pig.00962,MSTRG.32815	23.3862	4.54759	0.000527982	0.0309377	yes	up	0	0	0	0.108381	0.0347255	0.0145242	0	0.0525436	#N/A	#N/A	#N/A
Chr13_16275382_16289820	Pig.10910,MSTRG.30983	0.178275	-2.48783	0.00871303	0.199614	yes	down	0.0172066	0.0327755	0.0429962	0.015483	0.0208353	0	0.0309928	0.0121061	#N/A	#N/A	#N/A
Chr13_180597519_180621458		0.269652	-1.89083	0.000349085	0.0231575	yes	down	0.160595	0.0710136	0.0644943	0.0541905	0.111122	0.0145242	0.0987009	0.0599455	#N/A	#N/A	#N/A
Chr13_181182501_181207763		0.236902	-2.07764	0.000116048	0.0135999	yes	down	0.0917683	0.103789	0.150487	0.046449	0.0972315	0.0363106	0.115348	0.059997	#N/A	#N/A	#N/A
Chr13_185946951_185955198		0.0836077	-3.58022	0.0401761	1	yes	down	0.011471	0	0.0107491	0	0	0	0.0074067	0	#N/A	#N/A	#N/A
Chr13_28582593_28610417	Pig.01536	20.3695	4.34834	0.00519069	0.153554	yes	up	0	0	0	0.0387075	0.0347255	0.0653591	0	0.046264	FRMD4B-204	FERM domain-containing protein 4B isoform X4 [Sus scrofa]	XP_020924862.1
Chr13_53391484_53428936	Pig.06070	0.445159	-1.16761	0.00944145	0.205486	yes	down	0.154859	0.142027	0.0859925	0.077415	0.187518	0.123456	0.127626	0.129463	CEP63-201	centrosomal protein of 63 kDa isoform X1 [Sus scrofa]	XP_005669913.1
Chr13_55034018_55067505	Pig.06075	2.28188	1.19022	0.035834	0.359165	yes	up	0.0286776	0.109252	0.0698689	0.30966	0.423651	0.334058	0.0692661	0.35579	PCCB-205	propionyl-CoA carboxylase beta chain, mitochondrial precursor [Sus scrofa]	NP_999066.1
Chr13_57321321_57326544		0.157055	-2.67066	0.0246981	0.309691	yes	down	0	0.0437007	0.0161236	0	0.0208353	0	0.0199414	0.00694511	#N/A	#N/A	#N/A
Chr13_60625423_60715757	Pig.06117	2.35534	1.23594	0.0216797	0.294901	yes	up	0.0344131	0.0437007	0.0967415	0.317402	0.333365	0.23965	0.0582851	0.296806	TFDP2-201	transcription factor Dp-2 isoform X1 [Sus scrofa]	XP_020925210.1
Chr13_73668636_73669209	Pig.04725	3.7816	1.919	0.0465375	0.40377	yes	up	0	0	0.0214981	0.0696735	0.0277804	0.0798833	0.00716604	0.0591124	SLC33A1-201	acetyl-coenzyme A transporter 1 [Sus scrofa]	NP_001231174.1
Chr13_7626662_7653595	MSTRG.30700,Pig.07899	0.348539	-1.52061	0.00919735	0.203832	yes	down	0.0630907	0.0546259	0.102116	0.0541905	0.0555608	0.058097	0.0732776	0.0559494	#N/A	#N/A	#N/A
Chr13_86836296_86842481	Pig.11303	2.22608	1.15451	0.0180916	0.275626	yes	up	0.303983	0.46432	1.26839	4.16493	3.19475	2.04066	0.678897	3.13344	PHC3-201	polyhomeotic-like protein 3 isoform X1 [Sus scrofa]	XP_020925436.1
Chr13_98873441_98889700	Pig.06482	0.225929	-2.14606	0.0182356	0.276437	yes	down	0.0286776	0.092864	0	0.0232245	0.0416706	0	0.0405139	0.0216317	MCCC1-201	DCN1-like protein 1 isoform 1 [Homo sapiens]	NP_065691.2
Chr13_98885382_98889700	Pig.06482	0.379975	-1.39602	0.0122501	0.239269	yes	down	0.0516197	0.103789	0.0644943	0.046449	0.0694511	0.0726212	0.0733011	0.0628404	MCCC1-201	DCN1-like protein 1 isoform 1 [Homo sapiens]	NP_065691.2
Chr14_101274591_101287518	Pig.01977	0.341897	-1.54837	0.0220338	0.297066	yes	down	0.0917683	0.065551	0.0376217	0.046449	0.0763962	0.0290485	0.0649804	0.0506312	BTAF1-202	TATA-binding protein-associated factor 172 isoform X1 [Sus scrofa]	XP_003359339.2
Chr14_101276771_101293743	Pig.01977	0.0318457	-4.97276	0.00171242	0.0756196	yes	down	0.0229421	0.0218503	0.0107491	0	0	0	0.0185138	0	BTAF1-202	TATA-binding protein-associated factor 172 isoform X1 [Sus scrofa]	XP_003359339.2
Chr14_101787913_101794200	Pig.01974	3.06055	1.61379	0.00180534	0.077436	yes	up	0.0573552	0.0983266	0.0429962	0.441266	0.368091	0.573708	0.066226	0.461021	IDE-202	insulin-degrading enzyme isoform X1 [Sus scrofa]	XP_001925416.3
Chr14_113362657_113380470		0.287345	-1.79915	0.00012787	0.013915	yes	down	0.246627	0.185728	0.0806179	0.139347	0.0902864	0.108932	0.170991	0.112855	#N/A	#N/A	#N/A
Chr14_119577556_119578500	MSTRG.35758	0.0500822	-4.31956	0.0319061	1	yes	down	0.0344131	0	0	0	0	0	0.011471	0	0	0	NP_001244517.1
Chr14_119577556_119593281	MSTRG.35758	0.0703233	-3.82985	0.0145389	0.260588	yes	down	0.0172066	0.0273129	0.0483708	0	0.0138902	0	0.0309634	0.00463007	0	0	NP_001244517.1
Chr14_129750351_129804031	MSTRG.35885,Pig.12074	0.0736637	-3.7629	0.00104341	0.053886	yes	down	0.0229421	0.0382381	0.0268726	0	0.0138902	0	0.0293509	0.00463007	#N/A	#N/A	#N/A
Chr14_129783657_129804031	MSTRG.35885,Pig.12074	0.235664	-2.08519	0.0303927	0.329749	yes	down	0.0344131	0.0327755	0.0161236	0.0232245	0	0.0217864	0.0277707	0.0150036	#N/A	#N/A	#N/A
Chr14_129787047_129804031	MSTRG.35885,Pig.12074	0.310261	-1.68845	0.0235611	0.3049	yes	down	0.0172066	0.0437007	0.0429962	0	0.0277804	0.0435727	0.0346345	0.0237844	#N/A	#N/A	#N/A
Chr14_20015252_20015712	Pig.10671,MSTRG.33945	0.456429	-1.13154	0.0425878	0.390858	yes	down	0.527668	0.469782	0.79543	0.688994	0.513938	0.573708	0.597627	0.592213	#N/A	#N/A	#N/A
Chr14_2788181_2788578	Pig.05853,MSTRG.33426	3.99286	1.99742	0.033296	0.339756	yes	up	0	0.0163878	0.0214981	0.162572	0.0486157	0.116194	0.0126286	0.109127	#N/A	#N/A	#N/A
Chr14_34525395_34536598	Pig.07780	21.1527	4.40277	0.0442039	1	yes	up	0	0	0	0	0.0902864	0.058097	0	0.0494611	AUH-202	methylglutaconyl-CoA hydratase, mitochondrial isoform X2 [Sus scrofa]	XP_013845695.1
Chr14_39070772_39073187		10.7585	3.4274	0.0497263	0.425607	yes	up	0	0	0	0.0232245	0.0208353	0.0290485	0	0.0243694	#N/A	#N/A	#N/A
Chr14_39164972_39170296	Pig.07737	2.76684	1.46824	0.0218444	0.295821	yes	up	0.0344131	0.0273129	0.0429962	0.25547	0.118067	0.261436	0.0349074	0.211658	PPP3CA-201	serine/threonine-protein phosphatase 2B catalytic subunit gamma isoform isoform X1 [Sus scrofa]	XP_003483429.1
Chr14_41912046_41931580	Pig.07715	2.02283	1.01638	0.0275365	0.322707	yes	up	0.0630907	0.0819388	0.0644943	0.332885	0.388926	0.225126	0.0698413	0.315645	KCTD9-201	BTB/POZ domain-containing protein KCTD9 [Sus scrofa]	XP_003132863.3
Chr14_41930481_41931580	Pig.07715	2.48711	1.31447	1.11694e-05	0.00261794	yes	up	0.189272	0.191191	0.220356	0.990912	1.2015	1.13289	0.200273	1.10844	KCTD9-201	BTB/POZ domain-containing protein KCTD9 [Sus scrofa]	XP_003132863.3
Chr14_41930481_41938885	Pig.07715	2.39047	1.2573	0.0202454	0.289302	yes	up	0.0344131	0.0600885	0.112865	0.371592	0.402816	0.297747	0.0691222	0.357385	KCTD9-201	BTB/POZ domain-containing protein KCTD9 [Sus scrofa]	XP_003132863.3
Chr14_67193499_67194027	Pig.07134	0.0616335	-4.02014	0.0334618	1	yes	down	0.0516197	0	0.0537453	0	0.0138902	0	0.0351217	0.00463007	WSB2-204	WD repeat and SOCS box-containing protein 2 isoform X1 [Sus scrofa]	XP_020929503.1
Chr14_73544473_73546621		6.71407	2.74719	0.0210639	0.293068	yes	up	0.011471	0	0	0.046449	0.0694511	0.0508348	0.00382368	0.0555783	#N/A	#N/A	#N/A
Chr14_90028374_90034475	Pig.02027	2.92375	1.54782	0.00368425	0.120846	yes	up	0.292512	0.196653	0.5697	1.78055	2.2016	2.67972	0.352955	2.22062	UBE2D1-203	NR:NA	NP_003329.1
Chr14_90028374_90037704	Pig.02027	2.76339	1.46644	0.000947929	0.0506727	yes	up	0.235156	0.196653	0.241854	1.06833	1.58348	1.51778	0.224554	1.38986	UBE2D1-203	NR:NA	NP_003329.1
Chr14_97552461_97562490	Pig.02009,MSTRG.35312	7.84485	2.97174	0.0391202	0.373665	yes	up	0	0.0109252	0	0.0232245	0.0833413	0.0944076	0.00364172	0.0669911	#N/A	#N/A	#N/A
Chr15_102439703_102460666	Pig.00062	0.0579819	-4.10825	0.0282462	0.324778	yes	down	0.011471	0	0.0214981	0	0	0	0.0109897	0	ANKRD44-201	serine/threonine-protein phosphatase 6 regulatory ankyrin repeat subunit B isoform X2 [Sus scrofa]	XP_020931892.1
Chr15_107692551_107693830	Pig.00015	0.442089	-1.17759	0.0297124	0.329213	yes	down	0.26957	0.333218	0.274101	0.263211	0.444487	0.167029	0.292296	0.291576	BMPR2-201	bone morphogenetic protein receptor type-2 precursor [Sus scrofa]	NP_001191829.1
Chr15_107834252_107838768	Pig.00014	9.96687	3.31714	0.0214523	0.293117	yes	up	0	0	0	0.046449	0.0208353	0	0	0.0224281	FAM117B-201	protein FAM117B isoform X1 [Sus scrofa]	XP_003133638.2
Chr15_107979484_107995904		21.6002	4.43297	0.00262612	0.102587	yes	up	0	0	0	0.046449	0.0277804	0.0726212	0	0.0489502	#N/A	#N/A	#N/A
Chr15_107979484_108030953		0.075599	-3.72549	0.00277672	0.106712	yes	down	0.0229421	0.0491633	0.0107491	0	0.0138902	0	0.0276181	0.00463007	#N/A	#N/A	#N/A
Chr15_108009353_108030953		0.181957	-2.45833	0.0156275	0.266017	yes	down	0.0229421	0.0437007	0.0268726	0.0387075	0	0	0.0311718	0.0129025	#N/A	#N/A	#N/A
Chr15_108518521_108523889	Pig.00007	0.361126	-1.46943	0.00589687	0.159007	yes	down	0.0860328	0.092864	0.0644943	0.077415	0.062506	0.058097	0.0811304	0.066006	RAPH1	LOW QUALITY PROTEIN: ras-associated and pleckstrin homology domains-containing protein 1 [Sus scrofa]	XP_020930982.1
Chr15_111101369_111101489		0.0132022	-6.24307	0.0227482	0.301364	yes	down	0	0.125639	0	0	0	0	0.0418798	0	#N/A	#N/A	#N/A
Chr15_114471451_114507975	Pig.11726	3.57579	1.83826	0.0141181	0.257591	yes	up	0.0286776	0.0109252	0.0322472	0.170313	0.138902	0.254174	0.02395	0.187796	KANSL1L-201	LOW QUALITY PROTEIN: KAT8 regulatory NSL complex subunit 1-like protein [Sus scrofa]	XP_005672211.2
Chr15_114471451_114560459		0.303012	-1.72255	0.000387018	0.0245676	yes	down	0.183537	0.223966	0.091367	0.108381	0.173628	0.0653591	0.16629	0.115789	#N/A	#N/A	#N/A
Chr15_114503744_114533637	MSTRG.37316,Pig.11726	2.10044	1.07069	0.00280176	0.106712	yes	up	0.160595	0.136565	0.22573	0.735443	0.708401	0.973124	0.174296	0.805656	#N/A	#N/A	#N/A
Chr15_114503744_114560459	MSTRG.37316	0.237425	-2.07446	2.14377e-05	0.00384239	yes	down	0.355602	0.453395	0.139738	0.147089	0.29864	0.0798833	0.316245	0.175204	0	0	XP_005672211.2
Chr15_114533496_114560459	MSTRG.37316	0.296403	-1.75437	9.32191e-06	0.00236699	yes	down	0.579288	0.693748	0.521329	0.332885	0.722291	0.152505	0.598122	0.40256	0	0	XP_005672211.2
Chr15_114559343_114560459	MSTRG.37316	0.388761	-1.36304	0.00567623	0.156871	yes	down	0.38428	0.355068	0.198858	0.270953	0.479212	0.0871455	0.312735	0.279103	0	0	XP_005672211.2
Chr15_121744453_121761784	Pig.14206	0.349702	-1.5158	0.0085935	0.198453	yes	down	0.16633	0.355068	0.300974	0.301919	0.215298	0.116194	0.274124	0.211137	TNS1-207	PREDICTED: tensin-1 isoform X1 [Orcinus orca]	XP_020735031.1
Chr15_134979093_134991193		4.50784	2.17244	0.0440317	0.395816	yes	up	0.011471	0.0273129	0	0.131606	0.125012	0.152505	0.012928	0.136374	#N/A	#N/A	#N/A
Chr15_16932689_16939205	Pig.04263	30.6217	4.93648	0.0161311	1	yes	up	0	0	0	0.046449	0.0763962	0.0871455	0	0.0699969	RAB3GAP1-201	LOW QUALITY PROTEIN: rab3 GTPase-activating protein catalytic subunit [Sus scrofa]	XP_013839399.2
Chr15_61746768_61755658	Pig.00267	0.0919702	-3.44269	1.71815e-05	0.00327201	yes	down	0.0688263	0.136565	0.0376217	0.030966	0.0208353	0	0.0810042	0.0172671	PRPF40A-201	pre-mRNA-processing factor 40 homolog A isoform X5 [Sus scrofa]	XP_013839583.2
Chr15_61748345_61755658	Pig.00267	0.419714	-1.25252	0.000349605	0.0231575	yes	down	0.579288	0.595422	0.521329	0.449007	1.00704	0.152505	0.565346	0.536184	PRPF40A-201	pre-mRNA-processing factor 40 homolog A isoform X5 [Sus scrofa]	XP_013839583.2
Chr15_73782954_73813056	Pig.00214	0.0505876	-4.30507	0.0280251	1	yes	down	0.0229421	0.0109252	0	0	0	0	0.0112891	0	TTC21B-201	tetratricopeptide repeat protein 21B isoform X1 [Sus scrofa]	XP_020930449.1
Chr15_78573219_78637426	Pig.00183	0.083316	-3.58526	0.0148439	0.261441	yes	down	0	0.0109252	0.0107491	0	0	0	0.00722474	0	TLK1-201	serine/threonine-protein kinase tousled-like 1 isoform X1 [Sus scrofa]	XP_001927925.1
Chr15_85740264_85743393	MSTRG.36928	0.127541	-2.97096	0.0458958	0.40377	yes	down	0.252363	0.065551	0.112865	0.046449	0.0486157	0.0290485	0.143593	0.0413711	0	0	XP_020931560.1
Chr15_85772597_85773161	Pig.00129,MSTRG.36928	0.257835	-1.95548	0.0021224	0.0873913	yes	down	0.378544	0.349606	0.472959	0.178055	0.270859	0.23965	0.40037	0.229521	#N/A	#N/A	#N/A
Chr15_89598142_89609041	Pig.00116	0.0510907	-4.29079	0.0418923	1	yes	down	0	0.0109252	0.0268726	0	0	0	0.0125993	0	DNAJC10-201	dnaJ homolog subfamily C member 10 [Sus scrofa]	XP_020931971.1
Chr15_95030211_95032207	MSTRG.37007,Pig.00100	0.0339466	-4.88059	0.016354	0.271352	yes	down	0.011471	0.0163878	0.0268726	0	0	0	0.0182438	0	#N/A	#N/A	#N/A
Chr16_16615639_16616604		0.0503854	-4.31085	0.0122095	0.239269	yes	down	0	0.0109252	0.0268726	0	0	0	0.0125993	0	#N/A	#N/A	#N/A
Chr16_43972316_43991098	Pig.01172	0.0616399	-4.01999	0.029208	0.32672	yes	down	0.011471	0.0163878	0	0	0	0	0.00928627	0	GPBP1-202	vasculin isoform X1 [Sus scrofa]	XP_005672522.1
Chr16_45446435_45451682	Pig.01182	3.82275	1.93461	0.0188041	0.280863	yes	up	0.011471	0.0109252	0.0161236	0.0851565	0.118067	0.123456	0.0128399	0.108893	SLC38A9-201	sodium-coupled neutral amino acid transporter 9 isoform X1 [Sus scrofa]	XP_003134026.2
Chr16_53619992_53627836	Pig.01243	2.44876	1.29205	0.0382353	0.369851	yes	up	0.11471	0.174803	0.0967415	0.634803	0.763962	0.762523	0.128752	0.720429	C5orf51-201	UPF0600 protein C5orf51 homolog [Sus scrofa]	XP_003133963.1
Chr16_56515608_56558089	Pig.01261	0.285267	-1.80961	0.0107967	0.22688	yes	down	0.0401487	0.0273129	0.0752434	0.046449	0.0416706	0	0.0475683	0.0293732	LIFR-205	PREDICTED: leukemia inhibitory factor receptor [Lipotes vexillifer]	XP_007192247.1
Chr16_61812200_61855194	Pig.06638	0.0523015	-4.257	0.00583172	0.158654	yes	down	0.011471	0.0218503	0	0	0	0	0.0111071	0	ZFR-201	zinc finger RNA-binding protein isoform X2 [Sus scrofa]	XP_020932637.1
Chr16_6840714_6840849		2.53746	1.34338	0.0464054	0.40377	yes	up	0.137653	0.0600885	0.0644943	0.433524	0.395871	0.682639	0.0874118	0.504011	#N/A	#N/A	#N/A
Chr16_7578884_7588861		14.2783	3.83576	0.0397834	1	yes	up	0	0	0	0.046449	0.0347255	0.0145242	0	0.0318996	#N/A	#N/A	#N/A
Chr17_24285203_24293848	Pig.09548	19.2787	4.26894	0.0286078	1	yes	up	0	0	0	0.0387075	0.0416706	0.0508348	0	0.0437377	SEC23B-201	protein transport protein Sec23B [Sus scrofa]	NP_001254761.1
Chr17_26654627_26669224	Pig.09535	0.0355127	-4.81552	0.00454806	1	yes	down	0.0172066	0.0218503	0.0107491	0	0	0	0.016602	0	XRN2-201	LOW QUALITY PROTEIN: 5'-3' exoribonuclease 2 [Sus scrofa]	XP_004754180.1
Chr17_36957879_36963159		0.318705	-1.64971	0.0119078	0.239269	yes	down	0.0802973	0.0874014	0.0214981	0.0541905	0.0486157	0.0363106	0.0630656	0.0463723	#N/A	#N/A	#N/A
Chr17_4724796_4738629	Pig.08643	19.1657	4.26045	0.0465623	1	yes	up	0	0	0	0.077415	0.0347255	0.0145242	0	0.0422216	ASAH1-202	acid ceramidase [Sus scrofa]	XP_003134235.3
Chr17_51000006_51005416	Pig.09982	2.66286	1.41298	0.0333401	0.339756	yes	up	0.0630907	0.0491633	0.0752434	0.232245	0.416706	0.464776	0.0624991	0.371242	NFATC2-201	nuclear factor of activated T-cells, cytoplasmic 2 isoform X1 [Sus scrofa]	XP_005673069.1
Chr18_10856198_10865472	Pig.17900	0.057802	-4.11274	0.0124156	0.239433	yes	down	0	0.0109252	0.0214981	0	0	0	0.0108078	0	UBN2-201	ubinuclein-2 isoform X1 [Sus scrofa]	XP_003360164.3
Chr18_17987495_18042263	Pig.01297	0.0466305	-4.42258	0.0099573	0.212078	yes	down	0	0.0273129	0.0107491	0	0	0	0.0126873	0	MKLN1-202	PREDICTED: muskelin isoform X3 [Ovis aries]	XP_004008122.1
Chr18_18270856_18358987	MSTRG.40398	61.546	5.94359	6.75058e-05	0.00934955	yes	up	0	0	0	0.147089	0.138902	0.130718	0	0.138903	0	0	XP_020954391.1
Chr18_25510138_25527479		0.43235	-1.20973	0.0160689	0.269022	yes	down	0.33266	0.213041	0.472959	0.270953	0.458377	0.232388	0.339553	0.320572	#N/A	#N/A	#N/A
Chr18_2781902_2791211	Pig.15536	0.200516	-2.31821	0.0407624	0.384417	yes	down	0.0344131	0	0.0483708	0	0.0208353	0.0145242	0.0275946	0.0117865	Rbm33	LOW QUALITY PROTEIN: RNA-binding protein 33 [Sus scrofa]	XP_020934696.1
Chr18_2812373_2818304	Pig.15536	0.352932	-1.50254	0.0195528	0.282357	yes	down	0.0401487	0.0764762	0.0591198	0.046449	0.0416706	0.0508348	0.0585816	0.0463182	Rbm33	LOW QUALITY PROTEIN: RNA-binding protein 33 [Sus scrofa]	XP_020934696.1
Chr18_2812373_2825012	Pig.15536	0.450158	-1.1515	0.00492672	0.148631	yes	down	0.0802973	0.114714	0.198858	0.061932	0.166683	0.159767	0.13129	0.12946	Rbm33	LOW QUALITY PROTEIN: RNA-binding protein 33 [Sus scrofa]	XP_020934696.1
Chr18_45570355_45584742	Pig.07094,MSTRG.40802	0.069162	-3.85388	0.0460106	1	yes	down	0	0.0109252	0.0161236	0	0	0	0.00901625	0	#N/A	#N/A	#N/A
Chr18_55254219_55264445	Pig.17674	2.0187	1.01342	0.0172134	0.275626	yes	up	0.441635	0.234891	0.5697	0.805116	2.15298	2.62163	0.415409	1.85991	SUGCT-201	succinate--hydroxymethylglutarate CoA-transferase [Sus scrofa]	XP_020934311.1
Chr18_55330254_55397915	Pig.17676	0.0167812	-5.89701	0.000157492	0.015254	yes	down	0.0229421	0.0600885	0.0214981	0	0	0	0.0348429	0	CDK13-201	LOW QUALITY PROTEIN: cyclin-dependent kinase 13 [Sus scrofa]	XP_020934504.1
Chr18_55341894_55397915	Pig.17676	0.0998593	-3.32396	0.000317342	0.0231575	yes	down	0.0630907	0.0218503	0.0483708	0.015483	0	0.0145242	0.0444373	0.0100024	CDK13-201	LOW QUALITY PROTEIN: cyclin-dependent kinase 13 [Sus scrofa]	XP_020934504.1
Chr18_55387035_55397915	Pig.17676	0.162445	-2.62197	1.71546e-09	2.6135e-06	yes	down	0.49899	0.469782	0.317097	0.201279	0.250024	0.0217864	0.428623	0.157696	CDK13-201	LOW QUALITY PROTEIN: cyclin-dependent kinase 13 [Sus scrofa]	XP_020934504.1
ChrX_103903248_103914281		2.31304	1.20979	0.0203257	0.289302	yes	up	0.0688263	0.109252	0.145112	0.348368	0.736181	0.573708	0.10773	0.552752	#N/A	#N/A	#N/A
ChrX_16539567_16566142	Pig.05990	14.7407	3.88174	0.0388974	0.372722	yes	up	0	0	0	0.0232245	0.0486157	0.0290485	0	0.0336296	PIR-201	pirin [Sus scrofa]	XP_003134991.1
ChrX_18138664_18216807	Pig.05975	12.0639	3.59262	0.0271098	0.322044	yes	up	0	0	0	0.030966	0	0.0508348	0	0.027267	REPS2-201	ralBP1-associated Eps domain-containing protein 2 isoform X1 [Sus scrofa]	XP_020936433.1
ChrX_21050389_21065144	Pig.01775	2.1268	1.08869	0.0336245	0.340378	yes	up	0.0917683	0.0764762	0.16661	0.387075	0.62506	0.544659	0.111618	0.518931	RPS6KA3-201	ribosomal protein S6 kinase alpha-3 isoform 1 [Mus musculus]	EDL40821.1
ChrX_32827680_32872783	Pig.01823	0.0231816	-5.43087	0.00097914	0.0514386	yes	down	0.011471	0.0437007	0.0214981	0	0	0	0.0255566	0	DMD-205	dystrophin isoform X1 [Sus scrofa]	XP_020935207.1
ChrX_63391855_63406228	Pig.10458	0.154485	-2.69446	0.000367353	0.0238154	yes	down	0.0516197	0.0600885	0.0322472	0	0.0277804	0.0217864	0.0479851	0.0165223	ATRX-201	transcriptional regulator ATRX isoform X1 [Sus scrofa]	XP_020935739.1
Scaffold1036_73233_75314		11.0826	3.47022	0.0264192	1	yes	up	0	0	0.0107491	0.0387075	0.138902	0.0798833	0.00358302	0.085831	#N/A	#N/A	#N/A
Scaffold109_2537105_2542457	MSTRG.42720,Pig.10028	0.208026	-2.26516	0.00148858	0.0676971	yes	down	0.229421	0.376918	0.34397	0.131606	0.201408	0.108932	0.31677	0.147315	#N/A	#N/A	#N/A
Scaffold109_3844407_3854262	MSTRG.42741,MSTRG.42740,Pig.10036	0.17137	-2.54481	0.0172434	0.275626	yes	down	0.0344131	0.0218503	0.0376217	0	0.0208353	0.0145242	0.0312951	0.0117865	#N/A	#N/A	#N/A
Scaffold118_4072397_4105880	Pig.10810	0.0210568	-5.56957	0.00307048	0.11272	yes	down	0	0.0491633	0.0376217	0	0	0	0.0289283	0	RAD54B	LOW QUALITY PROTEIN: DNA repair and recombination protein RAD54B [Sus scrofa]	XP_020944760.1
Scaffold1223_37884_38702	Pig.22107	0.311799	-1.68131	0.0291127	0.32672	yes	down	0.0401487	0.0819388	0.0752434	0.030966	0.0555608	0.0508348	0.065777	0.0457872	ZMYM5	zinc finger MYM-type protein 5 isoform X1 [Sus scrofa]	XP_020921082.1
Scaffold124_4831155_4833214	Pig.11264	0.275933	-1.85761	0.0150668	0.26364	yes	down	0.0344131	0.0437007	0.0376217	0	0.0277804	0.0435727	0.0385785	0.0237844	HNRNPH3-201	PREDICTED: heterogeneous nuclear ribonucleoprotein H3 isoform X2 [Equus przewalskii]	XP_008505148.1
Scaffold124_5184262_5193508	Pig.11269	0.397937	-1.32939	0.0367575	0.362459	yes	down	0.0860328	0.065551	0.155861	0.108381	0.104177	0.0508348	0.102482	0.0877975	CCAR1-205	cell division cycle and apoptosis regulator protein 1 isoform X2 [Sus scrofa]	XP_020928155.1
Scaffold124_5184262_5197695	Pig.11269	0.463029	-1.11083	0.0256686	0.314455	yes	down	0.108975	0.185728	0.236479	0.224504	0.166683	0.145242	0.177061	0.178809	CCAR1-205	cell division cycle and apoptosis regulator protein 1 isoform X2 [Sus scrofa]	XP_020928155.1
Scaffold155_38709_43041	Pig.12772	2.62952	1.3948	0.0123589	0.239433	yes	up	0.0229421	0.0819388	0.0967415	0.363851	0.305585	0.493824	0.0672075	0.387753	STT3B-201	dolichyl-diphosphooligosaccharide--protein glycosyltransferase subunit STT3B [Sus scrofa]	XP_003132136.3
Scaffold155_4811844_4828350	Pig.12801	7.65174	2.93579	0.0307091	0.330638	yes	up	0	0	0	0.0387075	0	0.0145242	0	0.0177439	ITGA9-201	integrin alpha-9 isoform X2 [Sus scrofa]	XP_020927318.1
Scaffold158_4430821_4444232		0.253087	-1.98229	0.00718764	0.179514	yes	down	0.0458842	0.152952	0.0161236	0.0232245	0.0833413	0.0217864	0.0716534	0.042784	#N/A	#N/A	#N/A
Scaffold180_2562774_2570664	Pig.13867	2.37398	1.24731	0.000115166	0.0135999	yes	up	1.32491	1.68794	2.05307	7.71054	9.20921	9.70946	1.68864	8.8764	PFKFB1-201	6-phosphofructo-2-kinase/fructose-2,6-bisphosphatase 1 isoform X2 [Sus scrofa]	XP_005673720.1
Scaffold1928_5311_22991		7.80008	2.96349	0.0278924	0.324778	yes	up	0	0.0218503	0	0.356109	0	0.0217864	0.00728345	0.125965	#N/A	#N/A	#N/A
Scaffold288_845822_855512	Pig.17809	2.59177	1.37394	0.00444254	0.138127	yes	up	0.0458842	0.0600885	0.0322472	0.178055	0.291694	0.34132	0.0460733	0.270356	LAPTM4B-202	lysosomal-associated transmembrane protein 4B [Sus scrofa]	XP_005655413.3
Scaffold288_850448_855512	Pig.17809	3.75068	1.90715	6.55697e-05	0.00934955	yes	up	0.0401487	0.0437007	0.0322472	0.162572	0.34031	0.4793	0.0386988	0.327394	LAPTM4B-202	lysosomal-associated transmembrane protein 4B [Sus scrofa]	XP_005655413.3
Scaffold288_854949_855512	Pig.17809	52.5898	5.71671	0.000324217	0.0231575	yes	up	0	0	0	0.0851565	0.0347255	0.23965	0	0.119844	LAPTM4B-202	lysosomal-associated transmembrane protein 4B [Sus scrofa]	XP_005655413.3
Scaffold537_122771_123854	Pig.21009	0.0322731	-4.95352	0.0147775	1	yes	down	0.0229421	0.0163878	0.0161236	0	0	0	0.0184845	0	ZKSCAN8-201	PREDICTED: LOW QUALITY PROTEIN: zinc finger protein with KRAB and SCAN domains 8 [Capra hircus]	TKC35887.1
Scaffold914_78618_84711	Pig.21730	0.0657936	-3.92591	0.0246481	1	yes	down	0.0172066	0	0.0107491	0	0	0	0.00931854	0	JMJD1C-201	probable JmjC domain-containing histone demethylation protein 2C isoform X12 [Sus scrofa]	XP_020929319.1

## Sheet: N30D_M vs N150D_M_DEcircRNAs
circRNA id	Host gene id	FC(N150D_M/N30D_M)	Log2FC(N150D_M/N30D_M)	Pvalue	Padjust	Significant	Regulate	N30D_M1	N30D_M2	N30D_M3	N150D_M1	N150D_M2	N150D_M3	N30D_M	N150D_M	gene_name	description	nr_hit_name
Chr01_101874255_101891261	Pig.03333	0.0419827	-4.57406	0.00965313	0.380039	yes	down	0.0172066	0.0163878	0.0322472	0	0	0	0.0219472	0	ZNF236-201	zinc finger protein 236 isoform X1 [Sus scrofa]	XP_020954699.1
Chr01_103594729_103605128		0.0410116	-4.60782	0.0170385	0.470912	yes	down	0.0229421	0.0382381	0	0	0	0	0.0203934	0	#N/A	#N/A	#N/A
Chr01_113113103_113118487	Pig.03374	0.155433	-2.68564	0.0325901	0.643634	yes	down	0.011471	0.0109252	0.0376217	0	0.0136773	0	0.020006	0.0045591	ZCCHC2-201	zinc finger CCHC domain-containing protein 2 [Sus scrofa]	XP_020955289.1
Chr01_120325301_120333334	Pig.03428	2.54281	1.34642	0.000105856	0.0250051	yes	up	0.0688263	0.0874014	0.112865	0.289797	0.499222	0.22401	0.0896976	0.337676	PIAS1-201	E3 SUMO-protein ligase PIAS1 [Sus scrofa]	XP_003121797.3
Chr01_129010315_129022227	Pig.14315	4.64078	2.21437	0.0342045	0.646045	yes	up	0.0229421	0	0	0.0741341	0.0273546	0.0433568	0.00764736	0.0482818	CASC4-201	protein CASC4 isoform X1 [Sus scrofa]	XP_020952200.1
Chr01_134868579_134888642	MSTRG.1863,Pig.02307	21.6386	4.43553	0.0497329	0.712926	yes	up	0	0	0	0.0741341	0	0.0144523	0	0.0295288	#N/A	#N/A	#N/A
Chr01_134883950_134888642	MSTRG.1863,Pig.02307	14.1389	3.8216	0.0126819	0.414765	yes	up	0	0	0	0.0606552	0	0	0	0.0202184	#N/A	#N/A	#N/A
Chr01_134987666_135001147	Pig.02305	2.88463	1.52838	0.000128462	0.0268436	yes	up	0.0458842	0.142027	0.0376217	0.411107	0.341933	0.209558	0.0751777	0.320866	TRPM7-201	transient receptor potential cation channel subfamily M member 7 isoform X1 [Sus scrofa]	XP_023989567.2
Chr01_134990236_135001147	Pig.02305	4.59209	2.19915	0.00996127	0.384245	yes	up	0	0.0109252	0.0322472	0.12131	0.0752252	0.0722614	0.0143908	0.089599	TRPM7-201	transient receptor potential cation channel subfamily M member 7 isoform X1 [Sus scrofa]	XP_023989567.2
Chr01_140491850_140520766	Pig.02268	5.09436	2.3489	0.0481006	0.711493	yes	up	0	0.0218503	0.0107491	0.0539157	0.157289	0.050583	0.0108665	0.0872626	RFX7-201	DNA-binding protein RFX7 isoform X1 [Sus scrofa]	XP_020950488.1
Chr01_140717158_140759222	Pig.02266	20.3792	4.34903	0.013495	0.430602	yes	up	0.011471	0	0	0.208923	0.0410319	0.0722614	0.00382368	0.107406	TEX9-202	testis-expressed sequence 9 protein [Sus scrofa]	NP_001231528.1
Chr01_140726906_140759222	Pig.02266	31.4543	4.97519	5.73252e-06	0.00304822	yes	up	0.011471	0.0109252	0	0.613291	0.280385	0.151749	0.00746541	0.348475	TEX9-202	testis-expressed sequence 9 protein [Sus scrofa]	NP_001231528.1
Chr01_140733143_140759222	Pig.02266	9.40721	3.23377	6.17162e-06	0.00304822	yes	up	0.0573552	0.0437007	0.0429962	0.269579	1.88063	0.22401	0.0480174	0.791406	TEX9-202	testis-expressed sequence 9 protein [Sus scrofa]	NP_001231528.1
Chr01_143206410_143210729	Pig.02254	2.05856	1.04163	1.01192e-05	0.00422904	yes	up	0.751353	0.579034	0.865299	1.91401	2.85856	1.72705	0.731896	2.16654	SLTM-201	SAFB-like transcription modulator isoform X2 [Sus scrofa]	XP_020929243.1
Chr01_147821468_147848845	Pig.02228	0.390979	-1.35484	0.0361859	0.649197	yes	down	0.0573552	0.0273129	0.0752434	0.0336973	0.0341933	0.0216784	0.0533039	0.0298563	USP3-203	ubiquitin carboxyl-terminal hydrolase 3 isoform X1 [Sus scrofa]	XP_020949746.1
Chr01_148180394_148180674	Pig.02225	0.0464769	-4.42734	0.0374348	0.649197	yes	down	0.011471	0.0163878	0.0322472	0	0	0	0.0200353	0	DAPK2-201	death-associated protein kinase 2 [Sus scrofa]	NP_001230492.1
Chr01_150306573_150319472	Pig.02204	2.64093	1.40105	0.037966	0.649197	yes	up	0.0688263	0.065551	0.0591198	0.289797	0.533415	0.0361307	0.064499	0.286448	TXNL1-202	thioredoxin-like protein 1 isoform X1 [Castor canadensis]	XP_020042489.1
Chr01_159283610_159287965	Pig.08963	8.93542	3.15954	0.0496402	0.712926	yes	up	0	0	0	0.0134789	0	0.0216784	0	0.0117191	SMAD2-201	MAD, mothers against decapentaplegic homolog 2 (Drosophila), partial [synthetic construct]	NP_005892.1
Chr01_173364048_173401800	Pig.07316	8.63213	3.10972	0.0373247	0.649197	yes	up	0	0	0	0.0134789	0.0273546	0	0	0.0136112	BCKDHB-201	2-oxoisovalerate dehydrogenase subunit beta, mitochondrial isoform X1 [Sus scrofa]	XP_020938559.1
Chr01_176448874_176466186	Pig.00707	40.3253	5.33361	0.000118339	0.0257173	yes	up	0	0	0	0.0404368	0.0547092	0.0722614	0	0.0558025	ME1-201	NADP-dependent malic enzyme [Sus scrofa]	XP_001924368.2
Chr01_181973310_182068263	Pig.00734	12.195	3.60822	0.0337765	0.646045	yes	up	0	0.0109252	0	0.0741341	0.0889025	0.0433568	0.00364172	0.0687978	REV3L-201	DNA polymerase zeta catalytic subunit isoform X1 [Sus scrofa]	XP_020946897.1
Chr01_182615642_182642829	Pig.00740	7.3991	2.88735	0.0176967	0.476502	yes	up	0.0229421	0	0	0.155008	0.0683865	0.0289045	0.00764736	0.0840996	CDK19-201	PREDICTED: cyclin-dependent kinase 19-like isoform X1 [Elephantulus edwardii]	XP_020946795.1
Chr01_214381281_214383038		0.0960412	-3.3802	0.0172205	0.472521	yes	down	0.0172066	0.0109252	0	0	0	0	0.00937725	0	#N/A	#N/A	#N/A
Chr01_243632999_243642380	Pig.05180	0.283099	-1.82062	0.0245769	0.557888	yes	down	0.0401487	0.0819388	0.0376217	0.0202184	0.0341933	0.0144523	0.0532364	0.0229546	PPIL4-201	PREDICTED: peptidyl-prolyl cis-trans isomerase-like 4 isoform X1 [Dasypus novemcinctus]	XP_004752831.1
Chr01_248337313_248340068		0.368101	-1.44183	0.0487815	0.711493	yes	down	0.126181	0.0382381	0.0967415	0.0539157	0.0683865	0.0216784	0.0870537	0.0479936	#N/A	#N/A	#N/A
Chr01_24939833_24945056	Pig.06458	0.376274	-1.41014	0.0146188	0.443709	yes	down	0.0860328	0.0437007	0.0967415	0.0202184	0.0136773	0.0794875	0.0754917	0.0377944	PCSK5-203	proprotein convertase subtilisin/kexin type 5 isoform X1 [Sus scrofa]	XP_020920657.1
Chr01_258902156_258922448	Pig.14662	0.0830967	-3.58907	0.0350907	0.649197	yes	down	0.0172066	0	0.0161236	0	0	0	0.0111101	0	AFDN-201	afadin isoform X5 [Sus scrofa]	XP_020941446.1
Chr01_32467155_32487321	Pig.03310	4.32458	2.11256	0.0468009	0.711165	yes	up	0	0.0218503	0.0107491	0.0539157	0.0957411	0.0578091	0.0108665	0.0691553	CBWD1	COBW domain-containing protein 2 isoform X1 [Sus scrofa]	XP_001924427.4
Chr01_37930886_37959001	Pig.03277	4.14663	2.05194	0.0011415	0.106927	yes	up	0.0458842	0.0983266	0.0107491	0.673947	0.198321	0.101166	0.0516533	0.324478	KIAA2026-201	uncharacterized protein KIAA2026 homolog isoform X1 [Sus scrofa]	XP_003121963.3
Chr01_38862808_38873351	Pig.03271	0.0629059	-3.99066	0.0324137	0.642714	yes	down	0.011471	0.0109252	0.0214981	0	0	0	0.0146314	0	KDM4C-201	lysine-specific demethylase 4C isoform X1 [Sus scrofa]	XP_020919517.1
Chr01_5158032_5164452	Pig.03809	2.51511	1.33062	0.00112051	0.106803	yes	up	0.108975	0.109252	0.214981	0.283058	0.868509	0.433568	0.144403	0.528378	RAD23B-201	PREDICTED: UV excision repair protein RAD23 homolog B isoform X1 [Pteropus alecto]	XP_001927901.1
Chr01_5158032_5168097	Pig.03809	2.63426	1.3974	3.32196e-06	0.00200536	yes	up	0.315454	0.273129	0.494457	1.61073	2.28411	0.50583	0.361013	1.46689	RAD23B-201	PREDICTED: UV excision repair protein RAD23 homolog B isoform X1 [Pteropus alecto]	XP_001927901.1
Chr01_5163195_5168097	Pig.03809	2.55942	1.35582	0.00271967	0.191896	yes	up	0.11471	0.0491633	0.0967415	0.262839	0.642833	0.144523	0.0868717	0.350065	RAD23B-201	PREDICTED: UV excision repair protein RAD23 homolog B isoform X1 [Pteropus alecto]	XP_001927901.1
Chr01_69500313_69509750		28.1732	4.81625	0.0049399	0.268551	yes	up	0	0	0	0.0539157	0.0136773	0.0433568	0	0.0369833	#N/A	#N/A	#N/A
Chr01_74523778_74537105	Pig.02889	11.2263	3.48881	0.0490358	0.711493	yes	up	0	0	0	0	0.0273546	0.0216784	0	0.0163443	SOS2-201	son of sevenless homolog 2 [Sus scrofa]	XP_020957098.1
Chr02_1046946_1047881	Pig.20354	0.192075	-2.38026	0.0127491	0.414765	yes	down	0.0516197	0.092864	0.0107491	0.0269579	0.020516	0	0.0517442	0.0158246	HMGXB3-201	HMG domain-containing protein 3 isoform X1 [Sus scrofa]	XP_020940668.1
Chr02_10638020_10654968	Pig.14581	15.4302	3.94769	0.0485235	0.711493	yes	up	0	0	0	0	0.0889025	0	0	0.0296342	UBE2D3-202	NR:NA	NP_003330.1
Chr02_129529725_129544183	Pig.12557	2.4389	1.28623	0.0303296	0.625558	yes	up	0.0344131	0.0546259	0.0483708	0.175226	0.123096	0.158975	0.0458033	0.152432	QSER1-205	glutamine and serine-rich protein 1 [Sus scrofa]	XP_013849914.1
Chr02_130990677_131007514	Pig.12571	0.153302	-2.70556	0.0224804	0.528726	yes	down	0.0172066	0.0163878	0.0268726	0	0.0136773	0	0.0201557	0.0045591	CAT-201	catalase [Sus scrofa]	NP_999466.2
Chr02_142242602_142243343		0.344189	-1.53873	0.000879536	0.0884911	yes	down	0.149124	0.163878	0.0967415	0.0673947	0.10258	0.0433568	0.136581	0.0711104	#N/A	#N/A	#N/A
Chr02_15152164_15165811	Pig.17377	2.09491	1.06689	0.0218451	0.525153	yes	up	0.143388	0.0600885	0.134363	0.24936	0.800122	0.108392	0.112613	0.385958	SEC24A-201	protein transport protein Sec24A [Sus scrofa]	NP_001230853.1
Chr02_15158593_15165811	Pig.17377	36.5834	5.19312	0.00362586	0.226428	yes	up	0	0	0	0.0336973	0.10258	0.0361307	0	0.0574693	SEC24A-201	protein transport protein Sec24A [Sus scrofa]	NP_001230853.1
Chr02_15165110_15165811	Pig.17377	30.1074	4.91205	0.0288529	0.614737	yes	up	0	0	0.0214981	0.12131	0.540254	0.216784	0.00716604	0.292783	SEC24A-201	protein transport protein Sec24A [Sus scrofa]	NP_001230853.1
Chr02_15176625_15177107	Pig.17377	5.59685	2.48461	0.00942075	0.376345	yes	up	0.0229421	0	0	0.0673947	0.0957411	0.0289045	0.00764736	0.0640134	SEC24A-201	protein transport protein Sec24A [Sus scrofa]	NP_001230853.1
Chr02_155636386_155663230	Pig.20857	0.470357	-1.08817	0.00404965	0.240289	yes	down	0.252363	0.278592	0.182734	0.161747	0.15045	0.166201	0.237896	0.159466	Gstp1	glutathione S-transferase P-like isoform X1 [Sus scrofa]	XP_020938401.1
Chr02_159713586_159713781		0.203202	-2.29901	0.0340919	0.646045	yes	down	0.556346	0.322293	0.478333	0.148268	0.0615479	0.144523	0.452324	0.118113	#N/A	#N/A	#N/A
Chr02_159782911_159783143	Pig.20682,MSTRG.6959	0.108128	-3.20918	0.0491091	0.711493	yes	down	0.137653	0.142027	0.123614	0.0471763	0.020516	0	0.134431	0.0225641	#N/A	#N/A	#N/A
Chr02_160166851_160170454	Pig.20798	0.0279649	-5.16024	0.0207862	0.509768	yes	down	0.0172066	0.0546259	0.0214981	0	0	0	0.0311102	0	AP2A2-201	AP-2 complex subunit alpha-2 isoform X1 [Sus scrofa]	XP_020938239.1
Chr02_162769874_162784074	Pig.21711	0.0250708	-5.31785	0.0372397	0.649197	yes	down	0.0401487	0	0.0752434	0	0	0	0.038464	0	RXRA-201	retinoic acid receptor RXR-alpha isoform X2 [Sus scrofa]	XP_020927110.1
Chr02_170546957_170554595	Pig.10209	0.0643056	-3.95891	0.0312686	0.631534	yes	down	0.0172066	0	0.0268726	0	0	0	0.0146931	0	PBX3-201	pre-B-cell leukemia transcription factor 3 isoform 1 [Homo sapiens]	NP_006186.1
Chr02_17228457_17230614	Pig.12421	32.3732	5.01673	0.00823591	0.355914	yes	up	0	0	0	0.0606552	0.0547092	0.0289045	0	0.0480897	RAD50	DNA repair protein RAD50 [Sus scrofa]	XP_003354322.2
Chr02_18600695_18607910	Pig.12406	11.6991	3.54833	8.72009e-05	0.0215347	yes	up	0	0	0.0268726	0.0741341	0.259869	0.122844	0.00895755	0.152282	LYRM7-204	complex III assembly factor LYRM7 isoform X3 [Sus scrofa]	XP_020941079.1
Chr02_2353238_2357829	Pig.11984	0.02109	-5.56729	0.000270714	0.0408552	yes	down	0.0573552	0.0273129	0.0429962	0	0	0	0.0425548	0	HTR4-204	5-hydroxytryptamine receptor 4 [Sus scrofa]	NP_001001267.1
Chr02_28878006_28896777	Pig.07284,MSTRG.3982	0.0831578	-3.588	0.0425823	0.678444	yes	down	0.0172066	0	0.0161236	0	0	0	0.0111101	0	#N/A	#N/A	#N/A
Chr02_37476471_37491627	Pig.05628	0.0613102	-4.02773	0.0388795	0.649946	yes	down	0.011471	0.0163878	0.0161236	0	0	0	0.0146608	0	MAN2A1-205	alpha-mannosidase 2 [Sus scrofa]	XP_003123871.4
Chr02_64288819_64298085	MSTRG.4458,MSTRG.4459,Pig.02491	2.65719	1.4099	0.0103548	0.387984	yes	up	0.0688263	0.0491633	0.0644943	0.269579	0.451351	0.0578091	0.060828	0.25958	#N/A	#N/A	#N/A
Chr02_64288819_64310703	MSTRG.4458,MSTRG.4459,Pig.02491	2.12811	1.08957	0.0042815	0.244857	yes	up	0.0860328	0.0819388	0.161236	0.431326	0.499222	0.122844	0.109736	0.351131	#N/A	#N/A	#N/A
Chr02_64293568_64310703	MSTRG.4458,MSTRG.4459,Pig.02491	2.26379	1.17874	0.0492719	0.711953	yes	up	0.0802973	0.0491633	0.0483708	0.195445	0.239353	0.151749	0.0592771	0.195515	#N/A	#N/A	#N/A
Chr02_64347276_64350833	MSTRG.4458,MSTRG.4459,Pig.02491	4.41062	2.14098	0.0376197	0.649197	yes	up	0.0286776	0	0.0214981	0.0808736	0.280385	0.0144523	0.0167252	0.125237	#N/A	#N/A	#N/A
Chr02_7530324_7534052	Pig.16957	0.134165	-2.89792	0.0282516	0.610836	yes	down	0.0172066	0.0273129	0.0268726	0.0134789	0	0	0.0237974	0.00449298	ARHGAP26-201	rho GTPase-activating protein 26 isoform X5 [Sus scrofa]	XP_020941105.1
Chr02_92734565_92744854	MSTRG.5482	0.248229	-2.01026	0.00665873	0.320149	yes	down	0.0630907	0.0382381	0.0644943	0	0.0136773	0.0433568	0.0552744	0.0190114	0	0	XP_020935332.1
Chr02_92738870_92744854	MSTRG.5482	0.206532	-2.27556	1.16762e-17	3.17185e-14	yes	down	0.49899	0.458857	0.537453	0.208923	0.170966	0.0722614	0.498434	0.150717	0	0	XP_020935332.1
Chr02_92742950_92744854	MSTRG.5482	17.0839	4.09456	0.0489978	0.711493	yes	up	0	0	0	0	0.0341933	0.0361307	0	0.0234413	0	0	XP_020935332.1
Chr02_93039238_93079314	Pig.06424	0.164627	-2.60272	0.0339614	0.646045	yes	down	0	0.0327755	0.0483708	0	0.020516	0	0.0270488	0.00683865	CYP4F8-201	cytochrome P450, family 4, subfamily F, polypeptide 55 isoform X3 [Sus scrofa]	XP_020935397.1
Chr03_105294932_105332185	Pig.16535	0.113884	-3.13436	0.0221085	0.528564	yes	down	0.0172066	0.0109252	0.0537453	0	0.0136773	0	0.0272923	0.0045591	CLEC16A-201	protein CLEC16A isoform X1 [Sus scrofa]	XP_020942272.1
Chr03_108758890_108772982	Pig.18781	17.1102	4.09679	0.0102891	0.387984	yes	up	0	0	0	0	0.0136773	0.050583	0	0.0214201	PARN-202	poly(A)-specific ribonuclease PARN isoform X1 [Sus scrofa]	XP_020942220.1(poly
Chr03_133654793_133655350	MSTRG.10349,Pig.09034	0.035788	-4.80438	0.0271898	0.59089	yes	down	0.0401487	0	0.0376217	0	0	0	0.0259235	0	#N/A	#N/A	#N/A
Chr03_133654793_133680380	MSTRG.10349,Pig.09034	0.0493801	-4.33993	0.0240435	0.551175	yes	down	0.011471	0.0218503	0.0214981	0	0	0	0.0182732	0	#N/A	#N/A	#N/A
Chr03_15313209_15331615		0.396871	-1.33326	0.0486931	0.711493	yes	down	0.0401487	0.065551	0.0644943	0.0202184	0.0410319	0.0361307	0.0567313	0.0324603	#N/A	#N/A	#N/A
Chr03_19945644_19949910	Pig.20029	0.187235	-2.41707	0.0227814	0.531208	yes	down	0.0229421	0.0273129	0.0322472	0	0	0.0216784	0.0275007	0.00722614	DTNB	dystrobrevin beta isoform X1 [Sus scrofa]	XP_020943401.1
Chr03_20091718_20131946	Pig.20028	0.180647	-2.46875	0.00762652	0.341651	yes	down	0.0229421	0.0437007	0.0322472	0	0.0273546	0	0.0329633	0.0091182	ASXL2-201	putative Polycomb group protein ASXL2 isoform X1 [Sus scrofa]	XP_020943398.1
Chr03_26300083_26317651	Pig.06707	0.0686117	-3.8654	0.0327481	0.643634	yes	down	0.0172066	0.0109252	0.0107491	0	0	0	0.0129603	0	TTC27-201	LOW QUALITY PROTEIN: tetratricopeptide repeat protein 27 [Sus scrofa]	XP_020943314.1
Chr03_41590113_41591145	Pig.08256	19.1077	4.25608	0.0365734	0.649197	yes	up	0	0	0	0.0471763	0.0478706	0	0	0.0316823	PSME4-202	proteasome activator complex subunit 4 isoform X1 [Sus scrofa]	XP_003125198.5
Chr03_4386374_4410838	Pig.19386	0.0648024	-3.94781	0.0170752	0.470912	yes	down	0.0401487	0	0	0	0	0	0.0133829	0	SRBD1-203	S1 RNA-binding domain-containing protein 1 isoform X1 [Sus scrofa]	XP_020943221.1
Chr03_45601718_45637098	MSTRG.8253,Pig.04789,MSTRG.8254	0.311228	-1.68396	0.000116336	0.0257173	yes	down	0.189272	0.0600885	0.0967415	0.0673947	0.0615479	0.0289045	0.115367	0.0526157	#N/A	#N/A	#N/A
Chr03_56761987_56769941	Pig.04857	0.206746	-2.27407	0.00317443	0.206224	yes	down	0.0458842	0.0710136	0.0698689	0.0134789	0.020516	0.0216784	0.0622556	0.0185578	TIA1-203	nucleolysin TIA-1 isoform X3 [Sus scrofa]	XP_020943059.1
Chr03_57686609_57732712	Pig.04872	21.2158	4.40707	0.01149	0.405385	yes	up	0	0	0	0.0606552	0.0410319	0	0	0.0338957	ZNF638-202	zinc finger protein 638 isoform X4 [Sus scrofa]	XP_005662532.1
Chr03_59785632_59813718	Pig.11488	19.9734	4.32	0.00991157	0.384245	yes	up	0	0	0	0.0134789	0.0341933	0.0361307	0	0.0279343	ALMS1-201	Alstrom syndrome protein 1 isoform X5 [Sus scrofa]	XP_005662521.1
Chr03_59877081_59880275		7.17507	2.84299	0.0203578	0.509447	yes	up	0	0.0163878	0.0107491	0.0202184	0.0820638	0.144523	0.00904561	0.0822683	#N/A	#N/A	#N/A
Chr03_71892828_71898777	Pig.13433	2.80798	1.48953	0.00130262	0.116221	yes	up	0.275305	0.16934	0.40309	1.83313	1.35405	0.354081	0.282578	1.18042	UXS1-201	UDP-glucuronic acid decarboxylase 1 isoform b [Sus scrofa]	NP_001231703.1
Chr03_71892828_71908759	Pig.13433	2.23397	1.15961	0.0019	0.141772	yes	up	0.395751	0.349606	0.489082	2.25098	1.31302	0.498603	0.41148	1.3542	UXS1-201	UDP-glucuronic acid decarboxylase 1 isoform b [Sus scrofa]	NP_001231703.1
Chr03_77822466_77840328	MSTRG.8700,Pig.09456	0.419767	-1.25234	0.0104661	0.389468	yes	down	0.11471	0.114714	0.0859925	0.0606552	0.0752252	0.0578091	0.105139	0.0645632	#N/A	#N/A	#N/A
Chr03_84636714_84655608	Pig.13165	17.4218	4.12282	0.0156136	0.450362	yes	up	0	0.0109252	0	0.155008	0.136773	0.0216784	0.00364172	0.104486	ZC3H6-201	zinc finger CCCH domain-containing protein 6 [Sus scrofa]	XP_020942684.1
Chr03_84651591_84655608	Pig.13165	34.4171	5.10506	0.00848065	0.355914	yes	up	0	0	0	0.0539157	0.129934	0	0	0.0612834	ZC3H6-201	zinc finger CCCH domain-containing protein 6 [Sus scrofa]	XP_020942684.1
Chr03_94635259_94662825	Pig.09232	20.7219	4.37308	0.0401613	0.6612	yes	up	0	0	0	0.0202184	0.0410319	0.0289045	0	0.0300516	GTF2I-206	general transcription factor II-I isoform X1 [Sus scrofa]	XP_005662046.1
Chr03_94677157_94679723	Pig.09232	0.0623839	-4.00268	0.0160633	0.45454	yes	down	0.0229421	0	0.0214981	0	0	0	0.0148134	0	GTF2I-206	general transcription factor II-I isoform X1 [Sus scrofa]	XP_005662046.1
Chr03_97785863_97797486		0.3897	-1.35956	0.0108432	0.400755	yes	down	0.0975039	0.0983266	0.134363	0.0539157	0.0820638	0.050583	0.110065	0.0621875	#N/A	#N/A	#N/A
Chr03_98788503_98847046	Pig.10357	0.0702628	-3.83109	0.030892	0.6286	yes	down	0.0229421	0	0.0161236	0	0	0	0.0130219	0	CREBBP-201	CREB-binding protein [Sus scrofa]	XP_005662241.2
Chr04_105805169_105820433	Pig.01684	0.302015	-1.72731	0.00406895	0.240289	yes	down	0.131917	0.152952	0.0806179	0.0336973	0.10258	0.0361307	0.121829	0.0574693	MFSD14A	hippocampus abundant transcript 1 protein [Bos taurus]	NP_001095508.1
Chr04_105969655_105988484	Pig.01686,MSTRG.12330	8.11536	3.02065	0.00910235	0.366319	yes	up	0.0286776	0.0163878	0.0268726	0.357192	0.581285	0.0361307	0.0239793	0.324869	#N/A	#N/A	#N/A
Chr04_110746736_110758056	Pig.01703,MSTRG.12387	12.8141	3.67966	0.0116384	0.405385	yes	up	0	0	0	0.0134789	0.020516	0.0216784	0	0.0185578	#N/A	#N/A	#N/A
Chr04_110994123_110999920	Pig.01705	0.126522	-2.98254	0.0120686	0.405385	yes	down	0.0458842	0.0109252	0.0483708	0	0.020516	0	0.03506	0.00683865	ARHGAP29-201	rho GTPase-activating protein 29 [Sus scrofa]	XP_005663713.1
Chr04_112444369_112478901	Pig.01720	8.42425	3.07455	0.0468444	0.711165	yes	up	0	0	0	0.0202184	0	0.0144523	0	0.0115569	EVI5-208	ecotropic viral integration site 5 protein homolog isoform X4 [Sus scrofa]	XP_020945870.1
Chr04_13085270_13092315	Pig.03742	0.124087	-3.01057	0.0428252	0.680319	yes	down	0	0.0109252	0.0107491	0	0	0	0.00722474	0	ENPP2-201	ectonucleotide pyrophosphatase/phosphodiesterase family member 2 isoform X1 [Sus scrofa]	XP_013851977.1
Chr04_22743270_22752539	Pig.03771	2.57203	1.36291	0.00148624	0.118746	yes	up	0.108975	0.14749	0.161236	0.478502	0.930057	0.260141	0.139234	0.556233	EMC2-201	ER membrane protein complex subunit 2 isoform X4 [Sus scrofa]	XP_020944677.1
Chr04_26383601_26385684	Pig.08086	3.77205	1.91535	0.0330524	0.643634	yes	up	0	0.0163878	0.0107491	0.0606552	0.0410319	0.0433568	0.00904561	0.048348	UBR5-201	E3 ubiquitin-protein ligase UBR5 isoform X2 [Sus scrofa]	XP_020944690.1
Chr04_30299278_30333225	Pig.08107	5.58247	2.4809	0.0471779	0.711493	yes	up	0.0172066	0	0	0	0.0683865	0.0650352	0.00573552	0.0444739	OXR1-205	oxidation resistance protein 1 isoform X4 [Sus scrofa]	XP_013852007.1
Chr04_36821977_36836417	Pig.01495	3.47705	1.79786	0.00119815	0.110332	yes	up	0.172066	0.0983266	0.214981	0.815475	2.0174	0.0578091	0.161791	0.963562	WWP1-201	NEDD4-like E3 ubiquitin-protein ligase WWP1 isoform X1 [Sus scrofa]	XP_005663042.1
Chr04_4049704_4061942	Pig.13340	0.239597	-2.06132	0.0156449	0.450362	yes	down	0.0458842	0.0163878	0.0429962	0.0134789	0	0.0216784	0.0350894	0.0117191	ASAP1-201	arf-GAP with SH3 domain, ANK repeat and PH domain-containing protein 1 isoform X1 [Sus scrofa]	XP_020944565.1
Chr04_51710217_51714419	Pig.01430	4.72137	2.2392	0.0360978	0.649197	yes	up	0	0	0.0214981	0.0808736	0.0273546	0.0289045	0.00716604	0.0457109	NCOA2-204	nuclear receptor coactivator 2 [Sus scrofa]	NP_001107747.1
Chr04_55472441_55495387		10.5138	3.39421	0.00372183	0.227199	yes	up	0	0.0109252	0	0.0404368	0.0683865	0.0578091	0.00364172	0.0555441	#N/A	#N/A	#N/A
Chr04_57443192_57444790	Pig.19195,MSTRG.11078	0.266584	-1.90734	0.0341923	0.646045	yes	down	0.0688263	0.0710136	0.0107491	0.0202184	0.0273546	0.0144523	0.0501963	0.0206751	#N/A	#N/A	#N/A
Chr04_58527407_58562535	Pig.14062,MSTRG.11105	10.4684	3.38796	0.0303037	0.625558	yes	up	0	0	0	0	0.0547092	0	0	0.0182364	#N/A	#N/A	#N/A
Chr04_64190888_64200025		0.0250516	-5.31895	0.0468613	0.711165	yes	down	0.0344131	0.0437007	0.0268726	0	0	0	0.0349955	0	#N/A	#N/A	#N/A
Chr04_80181450_80184268	Pig.10564	0.168094	-2.57266	0.0153508	0.450362	yes	down	0.0458842	0.0273129	0.091367	0.0202184	0.020516	0	0.0548547	0.0135781	PRCC-201	proline-rich protein PRCC [Sus scrofa]	XP_001924378.1
Chr04_81195243_81224190		11.8978	3.57262	0.0384784	0.649197	yes	up	0	0	0	0.0404368	0.0136773	0	0	0.018038	#N/A	#N/A	#N/A
Chr04_81240281_81262538	Pig.10524	0.0398744	-4.64839	0.0014158	0.117833	yes	down	0.0344131	0.0163878	0.0161236	0	0	0	0.0223082	0	ASH1L-201	histone-lysine N-methyltransferase ASH1L isoform X1 [Sus scrofa]	XP_020945350.1
Chr04_9772083_9785803		5.05529	2.33779	0.00137273	0.116532	yes	up	0.0172066	0.0273129	0.0376217	0.38415	0.123096	0.0794875	0.0273804	0.195578	#N/A	#N/A	#N/A
Chr04_98096686_98108020		3.28354e-06	-18.2163	0.0112428	0.405385	yes	down	0	0.0273129	0.0107491	0	0	0	0.0126873	0	#N/A	#N/A	#N/A
Chr04_99003795_99006790	Pig.01657	19.1739	4.26107	0.019558	0.494225	yes	up	0	0	0	0.0336973	0.0273546	0.0216784	0	0.0275768	STXBP3-201	syntaxin-binding protein 3 [Sus scrofa]	XP_020945765.1
Chr05_100493607_100501606	Pig.11745	13.7264	3.77888	0.0347433	0.649197	yes	up	0	0	0	0	0.0410319	0.0216784	0	0.0209034	PPP1R12A-203	PREDICTED: protein phosphatase 1 regulatory subunit 12A isoform X2 [Ailuropoda melanoleuca]	XP_020948470.1
Chr05_103221996_103229378	Pig.11737	0.0390374	-4.679	0.00492273	0.268551	yes	down	0.0286776	0.0273129	0.0107491	0	0	0	0.0222465	0	ZDHHC17-202	palmitoyltransferase ZDHHC17 [Aotus nancymaae]	XP_020948474.1
Chr05_103840636_103841996	Pig.13236	0.0744922	-3.74677	0.0296113	0.620512	yes	down	0.011471	0	0.0268726	0	0	0	0.0127812	0	HEBP1-201	heme-binding protein 1 [Sus scrofa]	NP_001011509.1
Chr05_104214626_104274170	MSTRG.14747	0.0303619	-5.0416	0.00102563	0.0995049	yes	down	0.0286776	0.0546259	0	0	0	0	0.0277678	0	0	0	XP_020947997.1
Chr05_104253525_104274170	MSTRG.14747	0.10028	-3.3179	0.00836528	0.355914	yes	down	0.0975039	0	0	0	0	0.0144523	0.0325013	0.00481742	0	0	XP_020947997.1
Chr05_28548500_28549466	Pig.17267	2.97577	1.57326	0.00840983	0.355914	yes	up	0.26957	0.0819388	0.182734	0.276318	2.04476	0.361307	0.178081	0.894127	PTGES3-201	PREDICTED: prostaglandin E synthase 3 isoform X1 [Mustela putorius furo]	TEA31711.1
Chr05_28643182_28645814	Pig.17270	0.131798	-2.9236	0.0180381	0.476502	yes	down	0.0229421	0.0273129	0.0214981	0.0134789	0	0	0.0239177	0.00449298	RBMS2-201	RNA-binding motif, single-stranded-interacting protein 2 [Sus scrofa]	XP_020948550.1
Chr05_35383986_35390007		24.948	4.64085	0.00579464	0.292384	yes	up	0	0	0	0.0336973	0.0478706	0.0289045	0	0.0368241	#N/A	#N/A	#N/A
Chr05_42398007_42403290	MSTRG.13728,Pig.20735	0.460417	-1.11899	0.0468337	0.711165	yes	down	0.0745618	0.092864	0.0806179	0.0404368	0.116257	0.0216784	0.0826812	0.0594574	#N/A	#N/A	#N/A
Chr05_42533552_42543182	Pig.20738	8.02212	3.00398	0.00770297	0.341651	yes	up	0	0	0.0214981	0.0606552	0.10258	0.0722614	0.00716604	0.0784988	TMEM19-202	PREDICTED: ras-related protein Rab-21 [Felis catus]	XP_003989098.1
Chr05_43729794_43735400	Pig.06613	15.6214	3.96545	0.0255167	0.575237	yes	up	0	0	0	0	0.0273546	0.0361307	0	0.0211618	FGD4	FYVE, RhoGEF and PH domain-containing protein 4 isoform X1 [Sus scrofa]	XP_020947725.1
Chr05_48057014_48069096	Pig.06592	15.6768	3.97056	0.0391034	0.651683	yes	up	0	0	0	0.0202184	0	0.0361307	0	0.018783	PPFIBP1-201	liprin-beta-1 isoform X2 [Sus scrofa]	XP_013853229.2
Chr05_49170398_49184400	Pig.06583	20.0814	4.32779	0.0259069	0.576853	yes	up	0	0	0	0.0471763	0.0273546	0.0144523	0	0.029661	ITPR2-202	inositol 1,4,5-trisphosphate receptor type 2 isoform X1 [Sus scrofa]	XP_020948578.1
Chr05_49300221_49310929	Pig.06583	5.6268	2.49231	0.0206245	0.509447	yes	up	0	0.0163878	0	0.0404368	0.0615479	0.0361307	0.00546259	0.0460384	ITPR2-202	inositol 1,4,5-trisphosphate receptor type 2 isoform X1 [Sus scrofa]	XP_020948578.1
Chr05_53447071_53451047	Pig.06567	4.27242	2.09505	0.0147045	0.443832	yes	up	0.011471	0	0.0268726	0.0336973	0.116257	0.0794875	0.0127812	0.0764806	CMAS-201	PREDICTED: N-acylneuraminate cytidylyltransferase [Mustela putorius furo]	XP_003126481.1
Chr05_554154_555152	Pig.18444	35.4641	5.14829	0.00581216	0.292384	yes	up	0	0	0	0.0539157	0.0820638	0.0289045	0	0.0549614	XPNPEP3-201	probable Xaa-Pro aminopeptidase 3 isoform X1 [Sus scrofa]	XP_020947124.1
Chr05_60053380_60062312	Pig.09568	5.11482	2.35468	1.89638e-05	0.00735932	yes	up	0.11471	0.185728	0.0429962	0.512199	2.09263	0.419116	0.114478	1.00798	ATF7IP-202	activating transcription factor 7-interacting protein 1 isoform X1 [Sus scrofa]	XP_005664117.1
Chr05_61728003_61728231	Pig.18710	0.176164	-2.50501	0.00133822	0.116221	yes	down	0.0745618	0.174803	0.0644943	0.0134789	0.0410319	0.0289045	0.10462	0.0278051	PTMS	PREDICTED: parathymosin, partial [Camelus bactrianus]	XP_010956138.1
Chr05_61728003_61728261	Pig.18710	0.0694394	-3.8481	0.0193336	0.491537	yes	down	0	0.0273129	0.0107491	0	0	0	0.0126873	0	PTMS	PREDICTED: parathymosin, partial [Camelus bactrianus]	XP_010956138.1
Chr05_66647170_66689472	Pig.07503	26.9632	4.75292	0.0348319	0.649197	yes	up	0	0	0	0.0471763	0.0410319	0.0289045	0	0.0390376	ERC1-203	ELKS/Rab6-interacting/CAST family member 1 isoform X3 [Sus scrofa]	XP_020948632.1
Chr05_66678018_66707603	Pig.07503	0.0542263	-4.20486	0.00309971	0.206224	yes	down	0.0172066	0.0163878	0.0161236	0	0	0	0.0165726	0	ERC1-203	ELKS/Rab6-interacting/CAST family member 1 isoform X3 [Sus scrofa]	XP_020948632.1
Chr05_84175407_84176240	MSTRG.14449,Pig.04063	0.290188	-1.78494	0.000241181	0.0385393	yes	down	0.309718	0.365993	0.424588	0.107831	0.157289	0.173427	0.366766	0.146183	#N/A	#N/A	#N/A
Chr06_10669614_10673196		0.0299541	-5.0611	0.0190919	0.491537	yes	down	0.0458842	0.0163878	0.0268726	0	0	0	0.0297149	0	#N/A	#N/A	#N/A
Chr06_117805683_117808196	Pig.20051	0.440729	-1.18204	0.0383702	0.649197	yes	down	0.252363	0.267667	0.214981	0.215663	0.20516	0.0722614	0.245004	0.164361	GYS1-201	glycogen [starch]	NP_001182437.1
Chr06_119036106_119051091	Pig.17188	0.0986162	-3.34203	0.00853529	0.355914	yes	down	0.0286776	0.0218503	0.0483708	0.0134789	0	0	0.0329662	0.00449298	SAE1-205	SUMO-activating enzyme subunit 1 isoform X1 [Sus scrofa]	XP_003127291.1
Chr06_119036106_119058012	Pig.17188	0.0804492	-3.63578	0.040041	0.6612	yes	down	0.0229421	0	0.0107491	0	0	0	0.0112304	0	SAE1-205	SUMO-activating enzyme subunit 1 isoform X1 [Sus scrofa]	XP_003127291.1
Chr06_119254850_119273969	MSTRG.17506	0.0754952	-3.72747	0.0475316	0.711493	yes	down	0.0229421	0.0109252	0	0	0	0	0.0112891	0	0	0	XP_020950281.1
Chr06_119442930_119443236	Pig.17179	27.0633	4.75827	0.00524865	0.276853	yes	up	0	0	0	0	0.0410319	0.0650352	0	0.0353557	PRKD2-201	serine/threonine-protein kinase D2 isoform X2 [Sus scrofa]	XP_020950267.1
Chr06_12665615_12666692	Pig.12446	2.07604	1.05383	5.98253e-05	0.0180573	yes	up	0.418693	0.426082	0.585824	1.24006	2.14734	0.997207	0.476866	1.46154	USP24-201	ubiquitin carboxyl-terminal hydrolase 24 isoform X1 [Sus scrofa]	XP_020953471.1
Chr06_12677380_12677786	Pig.12446	39.3937	5.29989	0.0320565	0.638597	yes	up	0	0	0	0.0606552	0.0410319	0.0578091	0	0.0531654	USP24-201	ubiquitin carboxyl-terminal hydrolase 24 isoform X1 [Sus scrofa]	XP_020953471.1
Chr06_12677380_12679356	Pig.12446	67.4464	6.07567	0.000446846	0.0578027	yes	up	0	0	0	0.12805	0.0615479	0.0867136	0	0.0921038	USP24-201	ubiquitin carboxyl-terminal hydrolase 24 isoform X1 [Sus scrofa]	XP_020953471.1
Chr06_127929326_127934404	Pig.15970	2.88152	1.52683	0.0205854	0.509447	yes	up	0.0229421	0	0.0429962	0.0539157	0.116257	0.0939398	0.0219794	0.0880375	UBA2	PREDICTED: SUMO-activating enzyme subunit 2 [Vicugna pacos]	XP_006217089.1
Chr06_128177292_128197407	Pig.15966	25.3424	4.66348	0.00843333	0.355914	yes	up	0	0	0	0.0404368	0.0410319	0.0289045	0	0.0367911	LSM14A-201	protein LSM14 homolog A [Sus scrofa]	NP_001302727.1
Chr06_134537417_134576704	MSTRG.18159,Pig.13994	0.415057	-1.26862	0.014205	0.441006	yes	down	0.108975	0.158415	0.0967415	0.0404368	0.184644	0.0216784	0.121377	0.0822529	#N/A	#N/A	#N/A
Chr06_140007943_140008901	Pig.14992	0.175026	-2.51436	0.0181783	0.476502	yes	down	0.0286776	0.0327755	0.0376217	0	0.0273546	0	0.0330249	0.0091182	RBL2-201	retinoblastoma-like protein 2 isoform X2 [Sus scrofa]	XP_020949827.1
Chr06_154483498_154503554	Pig.12809	0.108631	-3.2025	0.00757522	0.341651	yes	down	0.0401487	0.0109252	0.0376217	0.0134789	0	0	0.0295652	0.00449298	SNTB2-201	beta-2-syntrophin [Bos taurus]	XP_026350890.1
Chr06_160725112_160742417	Pig.15713	2.73684	1.45251	0.0364431	0.649197	yes	up	0.0229421	0.0327755	0.0107491	0.0336973	0.129934	0.101166	0.0221556	0.0882659	CFDP1-201	craniofacial development protein 1 [Sus scrofa]	XP_020949434.1
Chr06_168400991_168401622		46.4635	5.53803	0.00763169	0.341651	yes	up	0	0	0	0.0471763	0.157289	0.0289045	0	0.0777899	#N/A	#N/A	#N/A
Chr06_27510977_27516672	Pig.05292	4.36188	2.12495	0.0232896	0.540736	yes	up	0	0.0109252	0.0107491	0.0134789	0.0752252	0.050583	0.00722474	0.046429	ANKRD13C-203	ankyrin repeat domain-containing protein 13C [Sus scrofa]	XP_003127975.1
Chr06_49667205_49680000	Pig.02792	10.385	3.37642	5.84572e-05	0.0180573	yes	up	0.0401487	0.0546259	0.0591198	0.539157	0.635995	0.903267	0.0512981	0.692806	FHOD3-206	FH1/FH2 domain-containing protein 3 isoform X2 [Sus scrofa]	XP_020951933.1
Chr06_61228450_61260684	MSTRG.15623,Pig.03622	0.0574495	-4.12156	0.0120825	0.405385	yes	down	0.011471	0.0327755	0	0	0	0	0.0147489	0	#N/A	#N/A	#N/A
Chr06_63650554_63671201		9.72298	3.2814	0.00190491	0.141772	yes	up	0.0172066	0.0163878	0	0.397628	0.0752252	0.0216784	0.0111981	0.164844	#N/A	#N/A	#N/A
Chr06_63650554_63691247		73.4656	6.199	5.89986e-05	0.0180573	yes	up	0	0	0	0.229142	0.0547092	0.0361307	0	0.106661	#N/A	#N/A	#N/A
Chr06_66564283_66595285	Pig.03664	25.1257	4.65109	0.00396105	0.239115	yes	up	0	0	0	0.0876131	0.0273546	0	0	0.0383226	SMCHD1-201	structural maintenance of chromosomes flexible hinge domain-containing protein 1 isoform X1 [Sus scrofa]	XP_020951796.1
Chr06_71770746_71807159		14.1878	3.82658	0.01518	0.448223	yes	up	0	0	0	0	0.0547092	0.0144523	0	0.0230538	#N/A	#N/A	#N/A
Chr06_71786235_71818899	Pig.03687	7.82945	2.96891	0.0378472	0.649197	yes	up	0.011471	0	0	0.0336973	0.0478706	0.0433568	0.00382368	0.0416416	ANKRD12-201	ankyrin repeat domain-containing protein 12 isoform X1 [Sus scrofa]	XP_020951722.1
Chr06_71800142_71818899	Pig.03687	0.0790385	-3.6613	0.0102567	0.387984	yes	down	0.0229421	0.0109252	0	0	0	0	0.0112891	0	ANKRD12-201	ankyrin repeat domain-containing protein 12 isoform X1 [Sus scrofa]	XP_020951722.1
Chr06_78493883_78508305	Pig.03001	0.101768	-3.29665	0.00481044	0.268551	yes	down	0.0688263	0.0491633	0.0859925	0	0.0341933	0	0.067994	0.0113978	AGO1-202	protein argonaute-3 [Bos taurus]	NP_001001133.2
Chr06_79118478_79127999	Pig.03010	2.39571	1.26045	0.00892801	0.364706	yes	up	0.0630907	0.109252	0.0591198	0.134789	0.451351	0.245689	0.0771541	0.277276	ZMYM4-201	zinc finger MYM-type protein 4 isoform X2 [Sus scrofa]	XP_020951559.1
Chr06_81552679_81556789		0.36841	-1.44062	0.0112523	0.405385	yes	down	0.0688263	0.0874014	0.0376217	0.0269579	0.0341933	0.0433568	0.0646164	0.034836	#N/A	#N/A	#N/A
Chr06_86668446_86670657	Pig.03134	3.15125	1.65592	0.0430762	0.682312	yes	up	0.011471	0	0.0483708	0.0673947	0.157289	0.050583	0.0199473	0.0917555	ARID1A-201	AT-rich interactive domain-containing protein 1A isoform X1 [Sus scrofa]	XP_020951289.1
Chr06_89512529_89516131	Pig.03192	0.0281935	-5.1485	0.000694618	0.0754772	yes	down	0.0516197	0.0163878	0.0268726	0	0	0	0.0316267	0	HNRNPR-201	heterogeneous nuclear ribonucleoprotein R isoform X2 [Heterocephalus glaber]	XP_020951171.1
Chr06_9306511_9324795	Pig.14732	11.9929	3.58411	0.0330058	0.643634	yes	up	0	0	0	0	0.020516	0.0289045	0	0.0164735	OSBPL9-202	oxysterol-binding protein-related protein 9 isoform X1 [Sus scrofa]	XP_005665492.2
Chr06_9307653_9324795	Pig.14732	0.0840457	-3.57268	0.0135529	0.430602	yes	down	0.011471	0	0.0214981	0	0	0	0.0109897	0	OSBPL9-202	oxysterol-binding protein-related protein 9 isoform X1 [Sus scrofa]	XP_005665492.2
Chr06_95797547_95804911	Pig.08610	0.249366	-2.00366	0.0149518	0.446335	yes	down	0.0286776	0.0437007	0.0591198	0.0336973	0.0136773	0	0.0438327	0.0157915	SPEN-201	LOW QUALITY PROTEIN: msx2-interacting protein [Sus scrofa]	XP_020951052.1
Chr06_95838274_95838750	Pig.08610	0.0349108	-4.84018	0.0310936	0.630342	yes	down	0.0172066	0.0327755	0.0268726	0	0	0	0.0256182	0	SPEN-201	LOW QUALITY PROTEIN: msx2-interacting protein [Sus scrofa]	XP_020951052.1
Chr06_96042171_96051495	Pig.08606	0.0609014	-4.03738	0.0101093	0.386789	yes	down	0.0286776	0	0.0161236	0	0	0	0.0149337	0	DDI1-201	PREDICTED: protein DDI1 homolog 2 isoform X2 [Orcinus orca]	XP_012389449.1
Chr07_108006972_108018158		18.7871	4.23167	0.0146004	0.443709	yes	up	0	0	0	0.0269579	0.0341933	0.0216784	0	0.0276098	#N/A	#N/A	#N/A
Chr07_109969272_109992959	Pig.09261	68.5227	6.09851	0.00028441	0.0410149	yes	up	0	0	0	0.12805	0	0.122844	0	0.0836314	ADGRF5-201	LOW QUALITY PROTEIN: adhesion G protein-coupled receptor F5 [Sus scrofa]	XP_013833469.2
Chr07_128236545_128237928	MSTRG.21817,Pig.11405	8.43502	3.07639	0.0224525	0.528726	yes	up	0	0	0.0107491	0.0269579	0.0683865	0.0361307	0.00358302	0.043825	#N/A	#N/A	#N/A
Chr07_128486884_128504793		0.168247	-2.57135	0.00824129	0.355914	yes	down	0.0458842	0.0327755	0.0483708	0	0	0.0289045	0.0423435	0.00963485	#N/A	#N/A	#N/A
Chr07_13231702_13255523	Pig.06798,MSTRG.19302	5.88114	2.5561	0.0148408	0.445469	yes	up	0	0.0218503	0.0107491	0.0741341	0.0752252	0.108392	0.0108665	0.0859171	#N/A	#N/A	#N/A
Chr07_133132933_133218836		0.0392466	-4.67129	0.0369424	0.649197	yes	down	0	0.0546259	0.0107491	0	0	0	0.0217916	0	#N/A	#N/A	#N/A
Chr07_29778850_29779243		0.190233	-2.39416	0.0193611	0.491537	yes	down	14.3617	12.4929	20.5683	4.61653	6.53091	2.37017	15.8077	4.50587	#N/A	#N/A	#N/A
Chr07_33686630_33731575		11.1738	3.48204	0.0392391	0.651945	yes	up	0	0	0	0	0.0273546	0.0216784	0	0.0163443	#N/A	#N/A	#N/A
Chr07_33729425_33731575	Pig.19099	2.93569	1.5537	0.00369425	0.227199	yes	up	0.108975	0	0.0752434	0.242621	0.437674	0.137297	0.0614061	0.27253	PAPOLA-201	poly(A) polymerase alpha isoform X4 [Sus scrofa]	XP_001929110.1(poly
Chr07_35429135_35449112	MSTRG.19801	2.69618e-10	-31.7884	1.01957e-20	5.5393e-17	yes	down	0.0286776	0	0	0	0	0	0.0095592	0	0	0	XP_001928879.1
Chr07_36723571_36725562		0.325537	-1.61911	0.000205007	0.0337516	yes	down	0.120446	0.125639	0.139738	0.0471763	0.0957411	0.0433568	0.128608	0.0620914	#N/A	#N/A	#N/A
Chr07_48314816_48325572	Pig.08878	19.696	4.29983	0.044299	0.69656	yes	up	0	0	0	0	0.0889025	0.0144523	0	0.0344516	CEP128-201	centrosomal protein of 128 kDa isoform X4 [Sus scrofa]	XP_020955223.1
Chr07_56816124_56823334	Pig.04349	0.0727125	-3.78165	0.0184952	0.480788	yes	down	0	0.0163878	0.0214981	0	0	0	0.0126286	0	SIPA1L1-201	signal-induced proliferation-associated 1-like protein 1 isoform X1 [Sus scrofa]	XP_005656429.1
Chr07_78284059_78313084	MSTRG.20541	0.00061693	-10.6626	0.000201267	0.0337516	yes	down	1.75507	1.98292	0.365468	0	0	0	1.36782	0	0	0	XP_020954893.1
Chr07_78284745_78314204	MSTRG.20541	920.13	9.84569	6.7018e-05	0.0188832	yes	up	0.0229421	0.0163878	0.0214981	56.9013	32.3537	0.0361307	0.020276	29.7637	0	0	XP_020954893.1
Chr07_78844713_78845999	Pig.09731	0.063292	-3.98183	0.0291542	0.616321	yes	down	0	0.0218503	0.0214981	0	0	0	0.0144495	0	IRF9-203	interferon regulatory factor 9 [Sus scrofa]	XP_008707015.1
Chr07_78985055_78985431	Pig.09719	0.252096	-1.98795	0.0479178	0.711493	yes	down	0.0286776	0.0218503	0.0591198	0.0202184	0.020516	0	0.0365493	0.0135781	DHRS1-201	dehydrogenase/reductase SDR family member 1 isoform X2 [Sus scrofa]	XP_003128591.1
Chr07_85427777_85452842	Pig.08415	16.8919	4.07826	0.0337091	0.646045	yes	up	0	0	0	0.0539157	0	0.0144523	0	0.0227893	STRN-201	striatin-3 isoform X1 [Sus scrofa]	XP_020955544.1
Chr07_85433213_85452842	Pig.08415	91.6675	6.51834	9.04458e-07	0.000982784	yes	up	0	0	0	0.0808736	0.191482	0.13007	0	0.134142	STRN-201	striatin-3 isoform X1 [Sus scrofa]	XP_020955544.1
Chr07_85434688_85452842	Pig.08415	28.7848	4.84723	0.0222789	0.528564	yes	up	0	0	0	0.0202184	0.0478706	0.050583	0	0.0395573	STRN-201	striatin-3 isoform X1 [Sus scrofa]	XP_020955544.1
Chr07_85446229_85452842	Pig.08415	3.10931	1.6366	0.0154328	0.450362	yes	up	0.0516197	0.0382381	0.0537453	0.0943525	0.512899	0.115618	0.0478677	0.240957	STRN-201	striatin-3 isoform X1 [Sus scrofa]	XP_020955544.1
Chr07_86387061_86413156		6.54492	2.71038	0.00257995	0.184433	yes	up	0.0458842	0.0109252	0.0107491	0.491981	0.177805	0.0144523	0.0225195	0.228079	#N/A	#N/A	#N/A
Chr07_95086666_95087001	MSTRG.20849,Pig.17563	2.1767	1.12214	0.0303971	0.625558	yes	up	0.0630907	0.0382381	0.0376217	0.168487	0.20516	0.0794875	0.0463168	0.151045	#N/A	#N/A	#N/A
Chr07_95723263_95758101		0.0345095	-4.85686	0.0116871	0.405385	yes	down	0.0172066	0.0163878	0.0483708	0	0	0	0.0273217	0	#N/A	#N/A	#N/A
Chr07_97789171_97799770	Pig.08775	7.15449	2.83885	0.00412376	0.24073	yes	up	0.0229421	0.0163878	0	0.0269579	0.191482	0.180653	0.0131099	0.133031	FBXO22-202	ubiquitin-conjugating enzyme E2 Q2 isoform X1 [Sus scrofa]	XP_020954668.1
Chr08_137613304_137619925	Pig.00542	14.6941	3.87716	0.03768	0.649197	yes	up	0	0	0	0.0134789	0.0410319	0.0144523	0	0.0229877	SEC31A-202	protein transport protein Sec31A isoform X12 [Sus scrofa]	XP_020957486.1
Chr08_137907029_137913935	Pig.00539	0.0443999	-4.4933	0.00166486	0.129217	yes	down	0.0286776	0.0109252	0.0214981	0	0	0	0.020367	0	ENOPH1-202	enolase-phosphatase E1 [Sus scrofa]	NP_001230759.1
Chr08_139877592_139928228	Pig.00525	0.0501024	-4.31898	0.0283774	0.610836	yes	down	0.0229421	0.0273129	0	0	0	0	0.0167517	0	ANTXR2-205	anthrax toxin receptor 2 [Sus scrofa]	XP_003129419.3
Chr08_20846343_20878523	Pig.16697	2.95225	1.56181	0.000955854	0.094421	yes	up	0.0344131	0.0437007	0.0322472	0.215663	0.184644	0.0794875	0.036787	0.159931	DCUN1D4-201	PREDICTED: DCN1-like protein 4 isoform X3 [Ceratotherium simum simum]	XP_004419114.1
Chr08_27957202_27994675	Pig.12463	0.483986	-1.04696	0.0305233	0.625786	yes	down	0.137653	0.114714	0.0859925	0.107831	0.0820638	0.050583	0.112786	0.0801594	APBB2-201	amyloid beta A4 precursor protein-binding family B member 2 isoform X9 [Sus scrofa]	XP_020956809.1
Chr08_28917574_28923061	Pig.07260	18.9875	4.24698	0.00858177	0.355914	yes	up	0	0	0	0.0202184	0.020516	0.0361307	0	0.0256217	PDS5A-201	PREDICTED: sister chromatid cohesion protein PDS5 homolog A isoform X2 [Equus asinus]	XP_014712699.1
Chr08_28917574_28926864	Pig.07260	11.7225	3.55121	0.024204	0.552522	yes	up	0	0	0	0.0336973	0.020516	0	0	0.0180711	PDS5A-201	PREDICTED: sister chromatid cohesion protein PDS5 homolog A isoform X2 [Equus asinus]	XP_014712699.1
Chr08_29001905_29035485	Pig.07259	31.8842	4.99477	0.0246444	0.557888	yes	up	0	0	0	0.0134789	0.0889025	0.0433568	0	0.0485794	UBE2K-201	PREDICTED: ubiquitin-conjugating enzyme E2 K [Fulmarus glacialis]	XP_010208319.1
Chr08_43322535_43360726	Pig.05313	2.16695	1.11567	0.0373419	0.649197	yes	up	0.229421	0.0764762	0.0537453	0.330234	0.635995	0.252915	0.119881	0.406381	ADGRA3-201	adhesion G protein-coupled receptor A3 isoform X1 [Sus scrofa]	XP_020956719.1
Chr08_49633206_49660217	Pig.05336	13.661	3.772	0.00508317	0.270754	yes	up	0	0	0	0.0134789	0.0341933	0.0144523	0	0.0207082	CPEB2-201	cytoplasmic polyadenylation element-binding protein 2 isoform X1 [Sus scrofa]	XP_020955979.1
Chr08_50950894_50964707	Pig.05340	6.65597	2.73465	0.0459881	0.711165	yes	up	0.011471	0	0	0.0202184	0.0410319	0.0433568	0.00382368	0.034869	RAB28-201	ras-related protein Rab-28 [Sus scrofa]	NP_001116647.1
Chr08_67440824_67447492		11.7546	3.55515	0.0177681	0.476502	yes	up	0	0	0	0	0.0410319	0.0144523	0	0.0184947	#N/A	#N/A	#N/A
Chr08_71418686_71512101		7.33851	2.87549	0.000780551	0.0831517	yes	up	0	0.0327755	0.0214981	0.101092	0.246191	0.209558	0.0180912	0.185614	#N/A	#N/A	#N/A
Chr08_82362096_82402170	Pig.01089	9.73455	3.28311	0.0145446	0.443709	yes	up	0.0229421	0.0109252	0	0.134789	0.423996	0.0361307	0.0112891	0.198305	ARHGAP10-201	rho GTPase-activating protein 10 isoform X1 [Sus scrofa]	XP_020956318.1
Chr08_84357230_84363091		17.2162	4.1057	0.0181875	0.476502	yes	up	0	0	0	0.0202184	0.0341933	0.0216784	0	0.0253634	#N/A	#N/A	#N/A
Chr08_98428798_98446659	Pig.01030	11.7672	3.5567	0.0167588	0.468583	yes	up	0	0	0	0	0.0410319	0.0144523	0	0.0184947	LARP1B-201	la-related protein 1B isoform X1 [Sus scrofa]	XP_013834346.2
Chr09_102579981_102597042	Pig.08199	0.247601	-2.01391	0.0369387	0.649197	yes	down	0.0458842	0.0437007	0.0537453	0	0.020516	0.0289045	0.0477767	0.0164735	ATM-201	serine-protein kinase ATM [Sus scrofa]	XP_020957581.1
Chr09_102928871_102935963	Pig.08203	3.24628	1.69879	0.0127011	0.414765	yes	up	0.0229421	0.0437007	0.0376217	0.114571	0.321417	0.0939398	0.0347548	0.176642	DDX10	probable ATP-dependent RNA helicase DDX10 [Sus scrofa]	XP_020918412.1
Chr09_109177641_109208969	Pig.11684	14.3666	3.84464	0.0212259	0.514824	yes	up	0	0	0	0.0134789	0.0273546	0.0216784	0	0.0208373	PICALM-207	phosphatidylinositol-binding clathrin assembly protein isoform X6 [Sus scrofa]	XP_020957732.1
Chr09_117431858_117432524	Pig.08148	4.05532	2.01982	0.00063503	0.0704105	yes	up	0.0458842	0.0491633	0.0698689	0.0943525	0.56077	0.31795	0.0549721	0.324357	CEP57	centrosomal protein of 57 kDa isoform X1 [Sus scrofa]	XP_020918348.1
Chr09_117475548_117490571	Pig.08149	0.0467277	-4.41958	0.028445	0.610836	yes	down	0.0344131	0.0109252	0.0107491	0	0	0	0.0186958	0	MTMR2-201	myotubularin-related protein 2 isoform X1 [Sus scrofa]	XP_003129845.1
Chr09_125072334_125098793	Pig.12884	9.42725	3.23684	0.0227488	0.531208	yes	up	0	0	0	0.0134789	0.0136773	0.0144523	0	0.0138695	FCHSD2-201	F-BAR and double SH3 domains protein 2 isoform X7 [Sus scrofa]	XP_020957951.1
Chr09_125742234_125752925	Pig.12876	3.23708	1.69469	0.0495568	0.712926	yes	up	0.0286776	0.0163878	0.0537453	0.148268	0.328255	0.0361307	0.0329369	0.170885	RAB6A-201	PREDICTED: ras-related protein Rab-6A isoform X1 [Oryctolagus cuniculus]	XP_002708751.1
Chr09_132363589_132363802	MSTRG.25786,Pig.20569	0.0200317	-5.64157	0.00592177	0.295165	yes	down	0.0344131	0.0218503	0.0859925	0	0	0	0.0474186	0	#N/A	#N/A	#N/A
Chr09_134961058_134964794	Pig.10235	19.3578	4.27484	0.0178303	0.476502	yes	up	0	0	0	0.0336973	0.0410319	0.0144523	0	0.0297272	RSF1-201	remodeling and spacing factor 1 [Sus scrofa]	ACJ53937.1
Chr09_140208927_140230748		21.4762	4.42467	0.00181331	0.138756	yes	up	0.011471	0	0	0.229142	0.0957411	0.0361307	0.00382368	0.120338	#N/A	#N/A	#N/A
Chr09_16522266_16542844	Pig.04694	19.3293	4.27272	0.0118783	0.405385	yes	up	0	0	0	0	0.109418	0	0	0.0364728	CEP350	LOW QUALITY PROTEIN: centrosome-associated protein 350 [Sus scrofa]	XP_020919409.1
Chr09_33496203_33504556	Pig.00298	6.48029	2.69606	0.00997213	0.384245	yes	up	0.0229421	0	0	0.0539157	0.0820638	0.0722614	0.00764736	0.0694136	KMT2E-201	histone-lysine N-methyltransferase 2E isoform X1 [Sus scrofa]	XP_013835277.2
Chr09_4458935_4472095	Pig.14410	0.0817116	-3.61331	0.0222105	0.528564	yes	down	0	0.0218503	0.0107491	0	0	0	0.0108665	0	CD46	membrane cofactor protein isoform X1 [Sus scrofa]	XP_020957856.1
Chr09_46064112_46077788		3.6193	1.85571	0.0373019	0.649197	yes	up	0.0172066	0	0.0107491	0.0336973	0.0889025	0.0289045	0.00931854	0.0505015	#N/A	#N/A	#N/A
Chr09_46149144_46149865	Pig.00347	22.551	4.49512	0.00134768	0.116221	yes	up	0	0.0109252	0	0.222402	0.123096	0.0361307	0.00364172	0.12721	TRA2A-201	PREDICTED: transformer-2 protein homolog alpha isoform X3 [Hipposideros armiger]	NP_932770.2
Chr09_46149144_46155136	Pig.00347	46.986	5.55416	0.0214971	0.519082	yes	up	0	0	0	0.0943525	0.0820638	0.0361307	0	0.070849	TRA2A-201	PREDICTED: transformer-2 protein homolog alpha isoform X3 [Hipposideros armiger]	NP_932770.2
Chr09_66539763_66565923	MSTRG.24574,Pig.00439	9.26648	3.21202	0.013697	0.432649	yes	up	0	0.0163878	0	0.101092	0.0752252	0.050583	0.00546259	0.0756334	#N/A	#N/A	#N/A
Chr09_72300530_72308474	Pig.00490	5.54237	2.4705	0.0320885	0.638597	yes	up	0.0172066	0.0218503	0	0	0.157289	0.151749	0.013019	0.103013	NUCKS1-203	nuclear ubiquitous casein and cyclin-dependent kinase substrate 1 [Sus scrofa]	BAC37408.1
Chr09_8107518_8117610	Pig.14368	0.42398	-1.23793	0.0141395	0.441006	yes	down	0.0688263	0.092864	0.0752434	0.0202184	0.0341933	0.0867136	0.0789779	0.0470418	LPGAT1-201	acyl-CoA:lysophosphatidylglycerol acyltransferase 1 [Sus scrofa]	XP_003357646.2
Chr09_90951665_90967965		0.0331763	-4.9137	0.000261381	0.0405738	yes	down	0.0172066	0.0273129	0.0376217	0	0	0	0.0273804	0	#N/A	#N/A	#N/A
Chr09_97364282_97379446		0.0579321	-4.10949	0.00660388	0.320149	yes	down	0.0172066	0.0273129	0	0	0	0	0.0148398	0	#N/A	#N/A	#N/A
Chr10_14523_14657		0.0027458	-8.50856	0.000842206	0.0879943	yes	down	0.33266	0.202116	0.472959	0	0	0	0.335912	0	#N/A	#N/A	#N/A
Chr10_15356518_15357043		0.0960529	-3.38003	0.00416503	0.24073	yes	down	0.0516197	0.0327755	0.0161236	0	0	0.0144523	0.0335063	0.00481742	#N/A	#N/A	#N/A
Chr10_15395333_15396840	Pig.10835	0.37097	-1.43063	0.0385023	0.649197	yes	down	0.0688263	0.092864	0.139738	0.0269579	0.0615479	0.0650352	0.100476	0.0511803	DISP1-201	protein dispatched homolog 1 isoform X3 [Sus scrofa]	XP_020920007.1
Chr10_22671725_22673756	Pig.11154	16.8883	4.07796	0.0460739	0.711165	yes	up	0	0	0	0.0134789	0.0410319	0.0216784	0	0.0253964	TGFB2-201	transforming growth factor beta-2 isoform X1 [Sus scrofa]	XP_020919953.1
Chr10_79750648_79751650	Pig.09964,MSTRG.27211	3.13724	1.64949	0.00551501	0.28609	yes	up	0.011471	0.0163878	0.0483708	0.195445	0.136773	0.0216784	0.0254099	0.117965	#N/A	#N/A	#N/A
Chr11_11019668_11027351	Pig.03524	2.72104	1.44416	0.00349505	0.223395	yes	up	0.0229421	0.0437007	0.0806179	0.262839	0.259869	0.0722614	0.0490869	0.198323	WASF3-201	wiskott-Aldrich syndrome protein family member 3 isoform X1 [Sus scrofa]	XP_020921162.1
Chr11_12201402_12205677	Pig.03511	2.2091	1.14346	8.19517e-06	0.00371036	yes	up	0.315454	0.196653	0.612696	1.21984	1.57973	0.758744	0.374934	1.18611	PAN3-201	PAB-dependent poly(A)-specific ribonuclease subunit PAN3 isoform X1 [Sus scrofa]	XP_005668351.1
Chr11_15417674_15431554	Pig.03492	0.184006	-2.44217	0.0181021	0.476502	yes	down	0.160595	0.213041	0.161236	0.0673947	0.0478706	0.0289045	0.17829	0.0480566	FRY	LOW QUALITY PROTEIN: protein furry homolog [Sus scrofa]	XP_020920836.1
Chr11_1765420_1770431	Pig.18473	0.0445582	-4.48817	0.0206292	0.509447	yes	down	0.011471	0.0273129	0.0214981	0	0	0	0.020094	0	ARHGEF7-201	rho guanine nucleotide exchange factor 7 isoform X9 [Sus scrofa]	XP_020921591.1
Chr11_22877583_22899081	Pig.03441,MSTRG.27747	0.174594	-2.51792	0.0368053	0.649197	yes	down	0.0286776	0.0163878	0.0107491	0	0	0.0144523	0.0186048	0.00481742	#N/A	#N/A	#N/A
Chr11_25492746_25493528		8.41356	3.07272	0.0124161	0.413846	yes	up	0	0.0163878	0	0.12805	0.0615479	0.0216784	0.00546259	0.0704254	#N/A	#N/A	#N/A
Chr11_50455535_50541934	Pig.04491	9.55511	3.25627	0.0371294	0.649197	yes	up	0	0	0	0	0	0.0361307	0	0.0120436	KLF12-202	PREDICTED: Krueppel-like factor 12 [Orycteropus afer afer]	XP_007946493.1
Chr11_50504248_50541934	Pig.04491	18.2154	4.18709	0.00318845	0.206224	yes	up	0	0	0	0	0.0341933	0.0433568	0	0.02585	KLF12-202	PREDICTED: Krueppel-like factor 12 [Orycteropus afer afer]	XP_007946493.1
Chr11_52476173_52507914	Pig.04496	0.38096	-1.39229	0.0342343	0.646045	yes	down	0.825915	1.04335	0.816928	0.404368	0.273546	0.628674	0.895399	0.435529	LMO7-201	LIM domain only protein 7 isoform X1 [Sus scrofa]	XP_020921337.1
Chr11_56028794_56032206	Pig.04511	2.53783	1.3436	0.00029442	0.0410149	yes	up	0.149124	0.163878	0.338595	0.869391	1.2378	0.368533	0.217199	0.82524	NDFIP2-202	NEDD4 family-interacting protein 2 [Sus scrofa]	XP_001926612.1
Chr11_56028794_56037997	Pig.04511	3.66209	1.87267	0.000150045	0.0275112	yes	up	0.0630907	0.0600885	0.134363	0.539157	0.916379	0.0650352	0.0858475	0.506857	NDFIP2-202	NEDD4 family-interacting protein 2 [Sus scrofa]	XP_001926612.1
Chr11_56028794_56044515	Pig.04511	21.5304	4.4283	0.00145312	0.117833	yes	up	0	0	0	0.0336973	0.0410319	0.0216784	0	0.0321359	NDFIP2-202	NEDD4 family-interacting protein 2 [Sus scrofa]	XP_001926612.1
Chr11_56028794_56048891	Pig.04511	7.12713	2.83332	0.000481504	0.0581336	yes	up	0.0172066	0	0.0161236	0.175226	0.0683865	0.0794875	0.0111101	0.1077	NDFIP2-202	NEDD4 family-interacting protein 2 [Sus scrofa]	XP_001926612.1
Chr11_7619806_7628690	Pig.03545	0.0543007	-4.20289	0.0271816	0.59089	yes	down	0	0.0109252	0.0429962	0	0	0	0.0179738	0	IFT88-201	intraflagellar transport protein 88 homolog [Sus scrofa]	XP_020921093.1
Chr11_9883781_9888954	Pig.03530	8.27494	3.04875	0.0065859	0.320149	yes	up	0.0573552	0.0600885	0.0967415	1.2131	0.116257	0.838232	0.0713951	0.722531	NUP58-201	PREDICTED: nucleoporin p58/p45, partial [Vicugna pacos]	XP_023105795.1
Chr12_11781912_11845650	MSTRG.28723	26.4321	4.72422	0.0265546	0.582121	yes	up	0.814444	1.20723	0.580449	58.1818	60.693	0.0144523	0.867375	39.6298	0	0	XP_020921875.1
Chr12_15327650_15366896	Pig.18677,MSTRG.28969	23.6278	4.56241	0.0118527	0.405385	yes	up	0	0	0	0.0471763	0.0478706	0.0144523	0	0.0364997	#N/A	#N/A	#N/A
Chr12_18397123_18397927	Pig.19653	2.74603	1.45735	0.0290736	0.616321	yes	up	0.0401487	0.0437007	0.0268726	0.155008	0.184644	0.108392	0.0369073	0.149348	METTL16-201	methyltransferase-like protein 16 isoform X4 [Sus scrofa]	XP_020923280.1
Chr12_21007643_21024830	Pig.11860	2.22937	1.15664	0.00318725	0.206224	yes	up	0.252363	0.196653	0.306348	0.795257	0.75909	0.744292	0.251788	0.766213	SSH1-201	LOW QUALITY PROTEIN: protein phosphatase Slingshot homolog 2 [Sus scrofa]	XP_020923177.1
Chr12_27032693_27034903	Pig.11236	0.0312539	-4.99982	0.000459117	0.0578031	yes	down	0.0401487	0.0327755	0.0107491	0	0	0	0.0278911	0	TAF15-201	TATA-binding protein-associated factor 2N [Sus scrofa]	XP_022408278.1
Chr12_27312206_27348924	MSTRG.29412,Pig.11225	0.00558517	-7.48418	6.87982e-09	9.34451e-06	yes	down	1.70345	0.824851	1.47262	0.0202184	0.0136773	0	1.33364	0.0112986	#N/A	#N/A	#N/A
Chr12_27312212_27323763	MSTRG.29412,Pig.11225	0.0192295	-5.70053	0.0373909	0.649197	yes	down	0.0458842	0.0327755	0.0644943	0	0	0	0.047718	0	#N/A	#N/A	#N/A
Chr12_27312212_27331982	MSTRG.29412,Pig.11225	0.0298828	-5.06454	0.02962	0.620512	yes	down	0.0516197	0.0109252	0.0268726	0	0	0	0.0298058	0	#N/A	#N/A	#N/A
Chr12_27320537_27340379	MSTRG.29412	156.539	7.29038	0.0466617	0.711165	yes	up	0	0	0	0.673947	0.0136773	0	0	0.229208	0	0	XP_020923050.1
Chr12_28082367_28086865	Pig.11217	5.41361	2.43659	0.037591	0.649197	yes	up	0	0	0.0107491	0.0404368	0.0478706	0	0.00358302	0.0294358	ACACA-203	acetyl-CoA carboxylase 1 isoform X1 [Sus scrofa]	XP_020921886.1
Chr12_40853263_40853381	MSTRG.29689	0.0443927	-4.49353	8.68863e-05	0.0215347	yes	down	0.103239	0.131102	0.0806179	0.0202184	0	0	0.104986	0.00673947	0	0	OWK14899.1
Chr12_48595782_48605968	Pig.19046	0.330945	-1.59534	0.0234341	0.541453	yes	down	0.108975	0.152952	0.188109	0.0471763	0.0547092	0.0939398	0.150012	0.0652751	EZH1-201	histone-lysine N-methyltransferase EZH1 [Sus scrofa]	NP_001230135.1
Chr12_48641949_48684250		0.00532029	-7.55428	2.13622e-06	0.00165801	yes	down	0	0.278592	0.236479	0	0	0	0.17169	0	#N/A	#N/A	#N/A
Chr12_56004263_56093033		0.0276666	-5.17571	0.00501999	0.270036	yes	down	0.0573552	0.0163878	0.0214981	0	0	0	0.031747	0	#N/A	#N/A	#N/A
Chr12_6494980_6514405	Pig.19284	0.0141029	-6.14786	0.0141347	0.441006	yes	down	0.0172066	0.065551	0.11824	0	0	0	0.0669991	0	AKAP10-203	A-kinase anchor protein 10, mitochondrial [Sus scrofa]	NP_999303.1
Chr12_6535923_6536562		0.0823936	-3.60132	0.0117133	0.405385	yes	down	0.011471	0.0437007	0.0537453	0	0.0136773	0	0.0363057	0.0045591	#N/A	#N/A	#N/A
Chr12_6535923_6544653		0.149716	-2.7397	0.00306818	0.206224	yes	down	0.0573552	0.092864	0.0752434	0.0202184	0.0136773	0.0144523	0.0751542	0.016116	#N/A	#N/A	#N/A
Chr12_6541810_6554029		0.0614304	-4.0249	0.000413449	0.0547871	yes	down	0.0802973	0.0710136	0.128989	0	0.0273546	0	0.0934332	0.0091182	#N/A	#N/A	#N/A
Chr12_6974079_7002516		3.44728	1.78546	0.0409323	0.669834	yes	up	0.0286776	0	0	0.0336973	0.0341933	0.0650352	0.0095592	0.0443086	#N/A	#N/A	#N/A
Chr13_101290645_101300295	Pig.06518	0.0762027	-3.71401	0.029695	0.620512	yes	down	0.0229421	0.0109252	0	0	0	0	0.0112891	0	MAP3K13-201	mitogen-activated protein kinase kinase kinase 13 [Sus scrofa]	XP_020925639.1
Chr13_113016848_113038677		2.43639	1.28475	2.5547e-05	0.00925311	yes	up	0.206479	0.300442	0.440711	1.3142	1.61392	0.527508	0.315877	1.15188	#N/A	#N/A	#N/A
Chr13_119129735_119141267	MSTRG.32525,Pig.02129	0.0343892	-4.8619	0.000518131	0.0611958	yes	down	0.011471	0.0163878	0.0537453	0	0	0	0.0272014	0	#N/A	#N/A	#N/A
Chr13_12812644_12829260		24.0495	4.58794	0.0265721	0.582121	yes	up	0	0	0	0.0336973	0.0957411	0	0	0.0431462	#N/A	#N/A	#N/A
Chr13_153304760_153311960	Pig.00962,MSTRG.32815	30.1848	4.91575	0.000190861	0.03345	yes	up	0	0	0	0.0269579	0.0341933	0.0650352	0	0.0420621	#N/A	#N/A	#N/A
Chr13_169351797_169415970	Pig.15023	0.00185967	-9.07074	6.9513e-05	0.0188832	yes	down	0.476048	0.497095	0.46221	0	0	0	0.478451	0	APP-203	PREDICTED: amyloid beta A4 protein, partial [Galeopterus variegatus]	NP_999537.1
Chr13_180594582_180621458		10.9825	3.45714	0.0175308	0.476502	yes	up	0	0	0.0107491	0.0808736	0.0820638	0.0144523	0.00358302	0.0591299	#N/A	#N/A	#N/A
Chr13_28582593_28610417	Pig.01536	17.1667	4.10154	0.00959926	0.380039	yes	up	0	0	0	0.0202184	0.0341933	0.0216784	0	0.0253634	FRMD4B-204	FERM domain-containing protein 4B isoform X4 [Sus scrofa]	XP_020924862.1
Chr13_49534611_49537459		0.241937	-2.0473	0.0387946	0.649946	yes	down	0.0401487	0.0273129	0.0859925	0.0336973	0	0.0144523	0.0511514	0.0160499	#N/A	#N/A	#N/A
Chr13_53391484_53428936	Pig.06070	2.83599	1.50385	0.000293397	0.0410149	yes	up	0.154859	0.142027	0.0859925	0.741341	0.71122	0.22401	0.127626	0.558857	CEP63-201	centrosomal protein of 63 kDa isoform X1 [Sus scrofa]	XP_005669913.1
Chr13_60625423_60706987	Pig.06117	5.68705	2.50768	0.0464257	0.711165	yes	up	0.011471	0.0109252	0.0107491	0.0202184	0.109418	0.122844	0.0110484	0.0841604	TFDP2-201	transcription factor Dp-2 isoform X1 [Sus scrofa]	XP_020925210.1
Chr13_60625423_60715757	Pig.06117	2.16835	1.1166	0.0418135	0.674222	yes	up	0.0344131	0.0437007	0.0967415	0.141529	0.266707	0.137297	0.0582851	0.181844	TFDP2-201	transcription factor Dp-2 isoform X1 [Sus scrofa]	XP_020925210.1
Chr13_7211491_7214578	Pig.07886,MSTRG.30668	51.6774	5.69146	0.0415565	0.674222	yes	up	0	0	0	0.114571	0.0683865	0.0433568	0	0.0754381	#N/A	#N/A	#N/A
Chr13_86632258_86638860	Pig.11305	37.3296	5.22225	0.000609539	0.0689921	yes	up	0	0	0	0.107831	0.020516	0.0289045	0	0.0524173	SEC62-201	translocation protein SEC62 [Sus scrofa]	XP_006764151.1
Chr13_86836296_86842481	Pig.11303	0.328606	-1.60557	0.00143212	0.117833	yes	down	0.303983	0.46432	1.26839	0.208923	0.649672	0.151749	0.678897	0.336781	PHC3-201	polyhomeotic-like protein 3 isoform X1 [Sus scrofa]	XP_020925436.1
Chr13_9451851_9452894	Pig.15877	3.52301	1.81681	0.00900842	0.365244	yes	up	0.0344131	0.0491633	0.0268726	0.107831	0.348771	0.144523	0.0368164	0.200375	QRICH1-203	glutamine-rich protein 1 [Sus scrofa]	XP_005669589.1
Chr13_98873441_98889700	Pig.06482	4.23973	2.08397	0.00773478	0.341651	yes	up	0.0286776	0.092864	0	0.37741	0.417158	0.0722614	0.0405139	0.288943	MCCC1-201	DCN1-like protein 1 isoform 1 [Homo sapiens]	NP_065691.2
Chr13_98885382_98889700	Pig.06482	3.31271	1.72801	0.000468128	0.0578031	yes	up	0.0516197	0.103789	0.0644943	0.49872	0.499222	0.13007	0.0733011	0.376004	MCCC1-201	DCN1-like protein 1 isoform 1 [Homo sapiens]	NP_065691.2
Chr14_101276771_101293743	Pig.01977	0.047385	-4.39943	0.00552907	0.28609	yes	down	0.0229421	0.0218503	0.0107491	0	0	0	0.0185138	0	BTAF1-202	TATA-binding protein-associated factor 172 isoform X1 [Sus scrofa]	XP_003359339.2
Chr14_104847735_104875171	Pig.01945	10.6792	3.41673	0.00219069	0.158694	yes	up	0	0	0.0214981	0.0336973	0.0341933	0.18788	0.00716604	0.0852567	SORBS1-203	sorbin and SH3 domain-containing protein 1 isoform X21 [Sus scrofa]	XP_020929807.1
Chr14_112746957_112780847	Pig.16330	13.9871	3.80603	0.0416656	0.674222	yes	up	0	0	0	0	0.0547092	0.0144523	0	0.0230538	SH3PXD2A-201	SH3 and PX domain-containing protein 2A isoform X1 [Sus scrofa]	XP_020928421.1
Chr14_129783657_129804031	MSTRG.35885,Pig.12074	0.224286	-2.15659	0.0407002	0.668048	yes	down	0.0344131	0.0327755	0.0161236	0.0269579	0	0	0.0277707	0.00898595	#N/A	#N/A	#N/A
Chr14_18956851_18968133		0.0345895	-4.85352	0.0125535	0.414765	yes	down	0.011471	0.0218503	0.0483708	0	0	0	0.0272307	0	#N/A	#N/A	#N/A
Chr14_20015252_20015712	Pig.10671,MSTRG.33945	0.0744172	-3.74822	1.2959e-09	2.34688e-06	yes	down	0.527668	0.469782	0.79543	0.0539157	0.109418	0.0361307	0.597627	0.0664883	#N/A	#N/A	#N/A
Chr14_39164972_39170296	Pig.07737	2.50457	1.32456	0.0424726	0.678444	yes	up	0.0344131	0.0273129	0.0429962	0.107831	0.157289	0.108392	0.0349074	0.124504	PPP3CA-201	serine/threonine-protein phosphatase 2B catalytic subunit gamma isoform isoform X1 [Sus scrofa]	XP_003483429.1
Chr14_73544473_73546621		9.25585	3.21037	0.00718476	0.339433	yes	up	0.011471	0	0	0.0471763	0.0683865	0.0361307	0.00382368	0.0505645	#N/A	#N/A	#N/A
Chr14_7769451_7769958	Pig.05797	0.471416	-1.08493	0.0203292	0.509447	yes	down	0.126181	0.092864	0.134363	0.0539157	0.136773	0.0578091	0.117803	0.0828326	TTC28-201	LOW QUALITY PROTEIN: tetratricopeptide repeat protein 28 [Sus scrofa]	XP_020929710.1
Chr14_83277934_83281237		9.62525	3.26682	0.0445553	0.697604	yes	up	0	0	0	0.0134789	0.0341933	0	0	0.0158907	#N/A	#N/A	#N/A
Chr14_90028374_90037704	Pig.02027	2.0003	1.00022	0.0256706	0.576315	yes	up	0.235156	0.196653	0.241854	0.734602	1.2036	0.216784	0.224554	0.71833	UBE2D1-203	NR:NA	NP_003329.1
Chr14_90124579_90137727	Pig.02025	0.119016	-3.07077	0.0484093	0.711493	yes	down	0	0.0218503	0	0	0	0	0.00728345	0	IPMK-201	inositol polyphosphate multikinase isoform X2 [Sus scrofa]	XP_020928881.1
Chr14_9266160_9274270	Pig.05775	2.6326	1.39649	2.07681e-06	0.00165801	yes	up	0.200743	0.202116	0.247228	0.909828	1.17625	0.469699	0.216696	0.851925	MTMR3-201	myotubularin-related protein 3 isoform X1 [Sus scrofa]	XP_013838486.2
Chr14_97709841_97735566	Pig.02006	3.47893	1.79864	0.0418291	0.674222	yes	up	0.0975039	0.0491633	0.0537453	0.283058	0.471867	0.274593	0.0668041	0.343173	PTEN	PREDICTED: phosphatidylinositol 3,4,5-trisphosphate 3-phosphatase and dual-specificity protein phosphatase PTEN [Ailuropoda melanoleuca]	NP_001003192.1
Chr15_105579889_105581573	Pig.00043	0.213789	-2.22574	0.0362744	0.649197	yes	down	0.0630907	0.0327755	0.0161236	0	0.0410319	0	0.0373299	0.0136773	SPATS2L-201	SPATS2-like protein isoform X1 [Sus scrofa]	XP_020930234.1
Chr15_107692551_107693830	Pig.00015	0.271116	-1.88302	0.000859826	0.0881402	yes	down	0.26957	0.333218	0.274101	0.0673947	0.246191	0.0650352	0.292296	0.126207	BMPR2-201	bone morphogenetic protein receptor type-2 precursor [Sus scrofa]	NP_001191829.1
Chr15_107979484_107995904		47.1382	5.55883	0.000144811	0.0275112	yes	up	0	0	0	0.101092	0.0478706	0.050583	0	0.0665152	#N/A	#N/A	#N/A
Chr15_107979484_108030953		6.58163	2.71845	0.000151912	0.0275112	yes	up	0.0229421	0.0491633	0.0107491	0.444805	0.307739	0.0939398	0.0276181	0.282161	#N/A	#N/A	#N/A
Chr15_108154178_108154481	Pig.00010	23.8975	4.57879	0.0299729	0.623919	yes	up	0	0	0	0.0539157	0.0273546	0.0216784	0	0.0343162	CYP20A1-202	neurobeachin-like protein 1 isoform X2 [Sus scrofa]	XP_020930765.1
Chr15_108518521_108523889	Pig.00007	0.346161	-1.53049	0.00736417	0.341651	yes	down	0.0860328	0.092864	0.0644943	0.0202184	0.0615479	0.0433568	0.0811304	0.0417077	RAPH1	LOW QUALITY PROTEIN: ras-associated and pleckstrin homology domains-containing protein 1 [Sus scrofa]	XP_020930982.1
Chr15_111001804_111003134	Pig.11694	20.2536	4.3401	0.0258424	0.576853	yes	up	0	0	0	0	0.0136773	0.0578091	0	0.0238288	INO80D-201	INO80 complex subunit D isoform X1 [Sus scrofa]	XP_020931699.1
Chr15_111101369_111101489		0.0196444	-5.66974	0.0385957	0.649197	yes	down	0	0.125639	0	0	0	0	0.0418798	0	#N/A	#N/A	#N/A
Chr15_114471451_114507975	Pig.11726	3.2244	1.68903	0.0265376	0.582121	yes	up	0.0286776	0.0109252	0.0322472	0.155008	0.170966	0.0289045	0.02395	0.118293	KANSL1L-201	LOW QUALITY PROTEIN: KAT8 regulatory NSL complex subunit 1-like protein [Sus scrofa]	XP_005672211.2
Chr15_114471451_114533637	Pig.11726	2.00909	1.00654	0.0466272	0.711165	yes	up	0.0458842	0.0546259	0.091367	0.148268	0.25303	0.151749	0.063959	0.184349	KANSL1L-201	LOW QUALITY PROTEIN: KAT8 regulatory NSL complex subunit 1-like protein [Sus scrofa]	XP_005672211.2
Chr15_114503744_114533637	MSTRG.37316,Pig.11726	2.43007	1.281	0.000388903	0.0528227	yes	up	0.160595	0.136565	0.22573	0.781778	0.895863	0.245689	0.174296	0.64111	#N/A	#N/A	#N/A
Chr15_114533496_114560459	MSTRG.37316	2.34566	1.22999	0.00130919	0.116221	yes	up	0.579288	0.693748	0.521329	2.89123	2.96114	0.758744	0.598122	2.2037	0	0	XP_005672211.2
Chr15_121744453_121761784	Pig.14206	0.200517	-2.31821	0.000143118	0.0275112	yes	down	0.16633	0.355068	0.300974	0.0741341	0.157289	0.0289045	0.274124	0.0867759	TNS1-207	PREDICTED: tensin-1 isoform X1 [Orcinus orca]	XP_020735031.1
Chr15_139705972_139714817	Pig.16069	0.126636	-2.98124	0.00212915	0.15632	yes	down	0.0688263	0.0273129	0.0483708	0.0134789	0.0136773	0	0.04817	0.00905208	TRAF3IP1-201	TRAF3-interacting protein 1 [Sus scrofa]	XP_020930617.1
Chr15_16010287_16022752	Pig.04255	0.158367	-2.65866	0.0308346	0.6286	yes	down	0.0745618	0.0218503	0.0537453	0	0	0.0289045	0.0500525	0.00963485	DARS-201	aspartate--tRNA ligase, cytoplasmic isoform X1 [Sus scrofa]	XP_003133314.1
Chr15_16073713_16081691	Pig.04256	0.0304285	-5.03843	0.0421967	0.676268	yes	down	0.0229421	0.0163878	0.0537453	0	0	0	0.031025	0	MCM6-201	DNA replication licensing factor MCM6 [Sus scrofa]	XP_020931503.1
Chr15_213251_217025	Pig.04211	0.0385449	-4.69732	0.00747253	0.341651	yes	down	0.011471	0.0273129	0.0322472	0	0	0	0.0236771	0	STAM2-201	signal transducing adapter molecule 2 isoform X1 [Sus scrofa]	XP_013852782.1
Chr15_25537906_25552485		0.0918261	-3.44495	0.0382597	0.649197	yes	down	0.0286776	0	0	0	0	0	0.0095592	0	#N/A	#N/A	#N/A
Chr15_3734521_3737333	Pig.04234	0.0513108	-4.28459	0.0262838	0.582121	yes	down	0.0229421	0	0.0322472	0	0	0	0.0183964	0	MBD5-201	methyl-CpG-binding domain protein 5 isoform X1 [Sus scrofa]	XP_020931757.1
Chr15_3974623_4005298		3.29756	1.7214	0.0486727	0.711493	yes	up	0	0.0163878	0.0322472	0.0808736	0.0615479	0.0722614	0.0162116	0.0715609	#N/A	#N/A	#N/A
Chr15_4166257_4202776		27.7726	4.79559	0.0443604	0.69656	yes	up	0	0	0	0.0606552	0.0273546	0.0289045	0	0.0389714	#N/A	#N/A	#N/A
Chr15_46857316_46859616	MSTRG.36392,Pig.02709	0.0548323	-4.18883	0.0117396	0.405385	yes	down	0.0286776	0	0.0214981	0	0	0	0.0167252	0	#N/A	#N/A	#N/A
Chr15_49079022_49080493	Pig.02682,MSTRG.36454	0.210514	-2.24801	0.00494295	0.268551	yes	down	0.0917683	0.092864	0.193483	0.0269579	0.0478706	0.0361307	0.126038	0.0369864	#N/A	#N/A	#N/A
Chr15_55579929_55590845	Pig.02646	0.060804	-4.03969	0.0168183	0.468583	yes	down	0.0286776	0	0.0161236	0	0	0	0.0149337	0	GSR-201	glutathione reductase, mitochondrial [Sus scrofa]	XP_003483683.2
Chr15_57751128_57770746	Pig.02634	0.238316	-2.06905	0.0120877	0.405385	yes	down	0.315454	0.185728	0.247228	0.0808736	0.116257	0.0650352	0.24947	0.0873886	HERC2-201	E3 ubiquitin-protein ligase HERC2 isoform X1 [Sus scrofa]	XP_020931002.1
Chr15_66111291_66122813	Pig.00251	15.1729	3.92343	0.0211566	0.514824	yes	up	0	0	0	0	0.0136773	0.0433568	0	0.0190114	ACVR1-202	PREDICTED: activin receptor type-1 isoform X1 [Pteropus alecto]	XP_023398704.1
Chr15_77526292_77541510	Pig.00190	3.40698	1.76849	0.0158585	0.453471	yes	up	0.0516197	0.0273129	0.0322472	0.2561	0.239353	0.0794875	0.0370599	0.191647	UBR3-203	LOW QUALITY PROTEIN: E3 ubiquitin-protein ligase UBR3 [Sus scrofa]	XP_020932162.1
Chr15_78573219_78637426	Pig.00183	4.07283	2.02603	0.0320613	0.638597	yes	up	0	0.0109252	0.0107491	0.0606552	0.0273546	0.0361307	0.00722474	0.0413802	TLK1-201	serine/threonine-protein kinase tousled-like 1 isoform X1 [Sus scrofa]	XP_001927925.1
Chr15_85752835_85764319	Pig.00129,MSTRG.36928	3.45658	1.78934	0.00643396	0.317779	yes	up	0.481784	0.884939	0.553576	4.22564	6.68136	0.44802	0.6401	3.78501	#N/A	#N/A	#N/A
Chr15_85761324_85761662	Pig.00129,MSTRG.36928	0.00077034	-10.3422	0.0161932	0.455843	yes	down	15.2565	0.0327755	12.9419	0	0	0.0216784	9.41038	0.00722614	#N/A	#N/A	#N/A
Chr15_95030211_95032207	MSTRG.37007,Pig.00100	0.0505111	-4.30726	0.0341009	0.646045	yes	down	0.011471	0.0163878	0.0268726	0	0	0	0.0182438	0	#N/A	#N/A	#N/A
Chr16_35775308_35787304	Pig.01140	9.19538	3.20091	0.0144618	0.443709	yes	up	0.0172066	0	0	0.0876131	0.0820638	0.0578091	0.00573552	0.0758287	ERBIN-201	erbin isoform X1 [Sus scrofa]	XP_020932447.1
Chr16_35783210_35787304	Pig.01140	4.6027	2.20248	0.0499275	0.713831	yes	up	0.011471	0.0163878	0	0.0673947	0.0341933	0.0722614	0.00928627	0.0579498	ERBIN-201	erbin isoform X1 [Sus scrofa]	XP_020932447.1
Chr16_35794581_35816115	Pig.01140	3.4362	1.78081	0.00565012	0.289595	yes	up	0.0229421	0.0273129	0.0268726	0.155008	0.0820638	0.122844	0.0257092	0.119972	ERBIN-201	erbin isoform X1 [Sus scrofa]	XP_020932447.1
Chr16_43972316_43999957		28.9209	4.85404	0.0130558	0.419717	yes	up	0	0	0	0.0202184	0.10258	0.0216784	0	0.0481589	#N/A	#N/A	#N/A
Chr16_45446435_45470707	Pig.01182	0.273772	-1.86895	0.0360131	0.649197	yes	down	0.0344131	0.0327755	0.0376217	0.0404368	0	0	0.0349368	0.0134789	SLC38A9-201	sodium-coupled neutral amino acid transporter 9 isoform X1 [Sus scrofa]	XP_003134026.2
Chr16_60541346_60541707	MSTRG.38732	0.13752	-2.86228	0.017893	0.476502	yes	down	0.0344131	0.0109252	0.0214981	0	0.0136773	0	0.0222788	0.0045591	0	0	XP_020932639.1
Chr16_7712350_7714095	Pig.12550	0.0929021	-3.42814	0.0329409	0.643634	yes	down	0.0229421	0.0327755	0.0376217	0	0.0136773	0	0.0311131	0.0045591	MARCH6-201	PREDICTED: E3 ubiquitin-protein ligase MARCH6 isoform X4 [Homo sapiens]	XP_020932182.1
Chr17_22442613_22456965	Pig.08668	19.234	4.26559	0.0235198	0.541453	yes	up	0	0	0	0	0.0341933	0.0433568	0	0.02585	KIF16B	kinesin-like protein KIF16B isoform X7 [Sus scrofa]	XP_020933706.1
Chr17_33805811_33808502	Pig.11912	9.69333	3.27699	0.0485319	0.711493	yes	up	0	0	0	0.0134789	0.0136773	0.0144523	0	0.0138695	ASXL1-201	putative Polycomb group protein ASXL1 isoform X1 [Sus scrofa]	XP_020933085.1
Chr17_36068445_36101106		0.166851	-2.58337	0.0016623	0.129217	yes	down	0.0630907	0.131102	0.11824	0.0202184	0.0341933	0.0216784	0.104144	0.0253634	#N/A	#N/A	#N/A
Chr17_47415651_47416132	Pig.14975	0.304488	-1.71554	0.0455484	0.709067	yes	down	0.0344131	0.0327755	0.0268726	0	0.020516	0.0216784	0.0313538	0.0140648	ZMYND8-204	LOW QUALITY PROTEIN: protein kinase C-binding protein 1 [Sus scrofa]	XP_020933698.1
Chr17_51000006_51005416	Pig.09982	2.91659	1.54428	0.0208298	0.509768	yes	up	0.0630907	0.0491633	0.0752434	0.289797	0.465028	0.101166	0.0624991	0.28533	NFATC2-201	nuclear factor of activated T-cells, cytoplasmic 2 isoform X1 [Sus scrofa]	XP_005673069.1
Chr18_1635118_1641276	MSTRG.40019	2.03677	1.02628	0.000563494	0.0651375	yes	up	0.338396	0.267667	0.435337	1.5029	0.923218	0.585317	0.347133	1.00381	0	0	XP_020934929.1
Chr18_18270856_18358987	MSTRG.40398	23.1553	4.53327	0.00301151	0.206224	yes	up	0	0	0	0.0202184	0.10258	0	0	0.0409327	0	0	XP_020954391.1
Chr18_18299792_18358987	MSTRG.40398	28.4502	4.83036	0.0192444	0.491537	yes	up	0	0	0	0.0336973	0.0547092	0.0361307	0	0.0415124	0	0	XP_020954391.1
Chr18_45729590_45754366	Pig.07095	0.212617	-2.23367	0.00885423	0.364432	yes	down	0.0229421	0.0437007	0.0214981	0	0.0136773	0.0144523	0.0293803	0.00937653	HIBADH-202	3-hydroxyisobutyrate dehydrogenase, mitochondrial [Sus scrofa]	XP_020934876.1
Chr18_49965466_49966837	Pig.15666	0.098642	-3.34165	0.0182427	0.476502	yes	down	0	0.0163878	0.0107491	0	0	0	0.00904561	0	TNS3-201	tensin-3 isoform X4 [Sus scrofa]	XP_020935014.1
Chr18_5421103_5454693	Pig.13668	0.385389	-1.37561	0.0319279	0.638597	yes	down	0.0860328	0.0491633	0.11824	0.0673947	0.0820638	0	0.0844786	0.0498195	KMT2C-201	histone-lysine N-methyltransferase 2C isoform X1 [Sus scrofa]	XP_020934780.1
Chr18_55221402_55264445	Pig.17674	0.253055	-1.98248	0.0151365	0.448223	yes	down	0.0458842	0.0382381	0.091367	0.0202184	0.0478706	0	0.0584964	0.0226963	SUGCT-201	succinate--hydroxymethylglutarate CoA-transferase [Sus scrofa]	XP_020934311.1
ChrX_103903248_103914281		2.91635	1.54416	0.00317322	0.206224	yes	up	0.0688263	0.109252	0.145112	0.795257	0.540254	0.0939398	0.10773	0.476483	#N/A	#N/A	#N/A
ChrX_117725135_117726758	MSTRG.42462	5.75328	2.52439	3.26836e-06	0.00200536	yes	up	0.011471	0.0273129	0.0537453	0.188705	0.259869	0.274593	0.0308431	0.241056	0	0	TKC34226.1
ChrX_94780501_94789821	Pig.02450,MSTRG.42159	0.310746	-1.68619	0.00729989	0.341651	yes	down	0.567817	0.393306	0.800805	0.161747	0.239353	0.310724	0.587309	0.237275	#N/A	#N/A	#N/A
ChrX_99519277_99522654	Pig.04387	11.1608	3.48037	0.0372391	0.649197	yes	up	0	0	0	0	0.0273546	0.0216784	0	0.0163443	DOCK11-201	PREDICTED: dedicator of cytokinesis protein 11 [Gekko japonicus]	XP_020936143.1
Scaffold1082_52013_54829	Pig.21957	0.243152	-2.04007	0.0398049	0.65933	yes	down	0.0458842	0.0109252	0.0322472	0	0.0341933	0	0.0296855	0.0113978	ACOX1-201	peroxisomal acyl-coenzyme A oxidase 1 [Sus scrofa]	NP_001094498.1
Scaffold288_850448_855512	Pig.17809	2.06381	1.04531	0.038516	0.649197	yes	up	0.0401487	0.0437007	0.0322472	0.0943525	0.143612	0.108392	0.0386988	0.115452	LAPTM4B-202	lysosomal-associated transmembrane protein 4B [Sus scrofa]	XP_005655413.3
Scaffold288_854949_855512	Pig.17809	20.8012	4.3786	0.00715061	0.339433	yes	up	0	0	0	0.0606552	0.0136773	0.0144523	0	0.0295949	LAPTM4B-202	lysosomal-associated transmembrane protein 4B [Sus scrofa]	XP_005655413.3
Scaffold3265_5751_23150		77.2815	6.27205	0.0454771	0.709067	yes	up	0	0	0	0.283058	0.0752252	0	0	0.119428	#N/A	#N/A	#N/A
Scaffold355_403360_409180	Pig.19337	2.15692	1.10897	0.0113183	0.405385	yes	up	0.0917683	0.0600885	0.11824	0.161747	0.437674	0.245689	0.0900321	0.281703	SCMH1-201	polycomb protein SCMH1 isoform X1 [Sus scrofa]	XP_020952602.1
Scaffold355_696928_702892	Pig.19342	0.0564503	-4.14687	0.0129531	0.418894	yes	down	0.011471	0.0109252	0.0268726	0	0	0	0.016423	0	NFYC-201	nuclear transcription factor Y subunit gamma isoform X1 [Sus scrofa]	XP_020952633.1
Scaffold419_234994_255861		3.46057	1.79101	0.0411769	0.671814	yes	up	0.0401487	0	0	0.0876131	0.0478706	0.0578091	0.0133829	0.0644309	#N/A	#N/A	#N/A
Scaffold4454_7885_7985	MSTRG.44768	0.14615	-2.77448	0.0368164	0.649197	yes	down	0.0630907	0.256742	0.139738	0.0336973	0.020516	0.0361307	0.15319	0.0301147	0	0	AMB36376.1

## Sheet: N30D_M vs N210D_M_DEcircRNAs
circRNA id	Host gene id	FC(N210D_M/N30D_M)	Log2FC(N210D_M/N30D_M)	Pvalue	Padjust	Significant	Regulate	N30D_M1	N30D_M2	N30D_M3	N210D_M1	N210D_M2	N210D_M3	N30D_M	N210D_M	gene_name	description	nr_hit_name
Chr01_103594729_103605128		0.0554785	-4.17193	0.0307592	0.28746	yes	down	0.0229421	0.0382381	0	0	0	0	0.0203934	0	#N/A	#N/A	#N/A
Chr01_123269900_123306601	Pig.10767	0.0830869	-3.58923	0.0108307	0.175538	yes	down	0.011471	0.0163878	0.0161236	0	0	0	0.0146608	0	SPRED1-201	sprouty-related, EVH1 domain-containing protein 1 isoform X1 [Sus scrofa]	XP_003121670.3
Chr01_129021689_129022227	Pig.14315	0.0821964	-3.60478	0.0321185	0.289424	yes	down	0.0516197	0	0.123614	0	0.0132131	0	0.0584113	0.00440438	CASC4-201	protein CASC4 isoform X1 [Sus scrofa]	XP_020952200.1
Chr01_134883950_134888642	MSTRG.1863,Pig.02307	68.2957	6.09372	3.65445e-05	0.00484136	yes	up	0	0	0	0.10962	0.046246	0.0549313	0	0.0702657	#N/A	#N/A	#N/A
Chr01_134987666_135001147	Pig.02305	2.94533	1.55843	0.000118503	0.0119717	yes	up	0.0458842	0.142027	0.0376217	0.198686	0.264263	0.233458	0.0751777	0.232136	TRPM7-201	transient receptor potential cation channel subfamily M member 7 isoform X1 [Sus scrofa]	XP_023989567.2
Chr01_134990236_135001147	Pig.02305	3.51991	1.81554	0.0382016	0.315412	yes	up	0	0.0109252	0.0322472	0.0616612	0.0594591	0.0274656	0.0143908	0.0495287	TRPM7-201	transient receptor potential cation channel subfamily M member 7 isoform X1 [Sus scrofa]	XP_023989567.2
Chr01_135049708_135057177	Pig.02305	0.0708062	-3.81998	0.0452506	1	yes	down	0.0286776	0.0109252	0.0107491	0	0	0	0.0167839	0	TRPM7-201	transient receptor potential cation channel subfamily M member 7 isoform X1 [Sus scrofa]	XP_023989567.2
Chr01_136529850_136532048		2.3839	1.25332	0.011204	0.179677	yes	up	0.0516197	0.065551	0.0483708	0.150727	0.112312	0.144195	0.0551805	0.135745	#N/A	#N/A	#N/A
Chr01_140717158_140759222	Pig.02266	28.7333	4.84465	0.00589571	0.119382	yes	up	0.011471	0	0	0.123322	0.0792788	0.144195	0.00382368	0.115599	TEX9-202	testis-expressed sequence 9 protein [Sus scrofa]	NP_001231528.1
Chr01_140726906_140759222	Pig.02266	171.074	7.41848	1.0806e-11	1.64629e-08	yes	up	0.011471	0.0109252	0	1.38395	1.27507	1.35268	0.00746541	1.33723	TEX9-202	testis-expressed sequence 9 protein [Sus scrofa]	NP_001231528.1
Chr01_140733143_140759222	Pig.02266	19.0244	4.24978	2.57052e-09	2.61079e-06	yes	up	0.0573552	0.0437007	0.0429962	0.801596	0.898493	1.15356	0.0480174	0.951215	TEX9-202	testis-expressed sequence 9 protein [Sus scrofa]	NP_001231528.1
Chr01_141429670_141430667	Pig.02263	0.0534969	-4.2244	0.0118831	1	yes	down	0.0286776	0	0.0429962	0	0	0	0.0238913	0	TCF12-203	transcription factor 12 isoform X1 [Sus scrofa]	XP_020950355.1
Chr01_147821468_147848845	Pig.02228	0.169247	-2.5628	0.0035335	0.0904753	yes	down	0.0573552	0.0273129	0.0752434	0.0137025	0.0132131	0	0.0533039	0.00897188	USP3-203	ubiquitin carboxyl-terminal hydrolase 3 isoform X1 [Sus scrofa]	XP_020949746.1
Chr01_147921937_147922943	Pig.02226	17.5063	4.1298	0.0380513	1	yes	up	0	0	0	0.0205537	0.0198197	0.0137328	0	0.0180354	HERC1-201	probable E3 ubiquitin-protein ligase HERC1 isoform X1 [Sus scrofa]	XP_020949597.1
Chr01_17284893_17285134	Pig.03920	0.235913	-2.08367	0.0234967	0.263215	yes	down	0.229421	0.371456	0.236479	0.0959174	0.0594591	0.0480649	0.279119	0.0678138	Tpm2	PREDICTED: tropomyosin beta chain isoform X4 [Loxodonta africana]	0
Chr01_176448874_176466186	Pig.00707	21.6418	4.43575	0.00191669	0.0648907	yes	up	0	0	0	0.027405	0.0132131	0.0274656	0	0.0226946	ME1-201	NADP-dependent malic enzyme [Sus scrofa]	XP_001924368.2
Chr01_182642754_182716683	Pig.00740	0.0830687	-3.58955	0.0122758	0.18891	yes	down	0.011471	0.0163878	0.0161236	0	0	0	0.0146608	0	CDK19-201	PREDICTED: cyclin-dependent kinase 19-like isoform X1 [Elephantulus edwardii]	XP_020946795.1
Chr01_203615212_203632331	Pig.00838	0.0440033	-4.50624	0.00409901	0.0960744	yes	down	0.011471	0.0437007	0.0268726	0	0	0	0.0273481	0	RARS2-201	probable arginine--tRNA ligase, mitochondrial isoform X1 [Sus scrofa]	XP_020945502.1
Chr01_207420625_207465177	Pig.00864	4.05629	2.02016	0.00256445	0.0779692	yes	up	0.0802973	0.114714	0.0806179	0.431628	0.330328	0.398252	0.0918765	0.386736	RIMS1-201	regulating synaptic membrane exocytosis protein 1 isoform X9 [Sus scrofa]	XP_020928548.1
Chr01_214379127_214383038		0.375812	-1.41192	0.0059162	0.119382	yes	down	0.0917683	0.0710136	0.102116	0.0342562	0.0264263	0.0411985	0.0882993	0.0339603	#N/A	#N/A	#N/A
Chr01_227027511_227029923		0.0364688	-4.77719	0.00189591	0.0648907	yes	down	0.0344131	0.0327755	0.0322472	0	0	0	0.0331453	0	#N/A	#N/A	#N/A
Chr01_227568437_227569760	Pig.04011	5.31731	2.4107	0.0410408	0.32313	yes	up	0.011471	0.0163878	0	0.0342562	0.0264263	0.102996	0.00928627	0.0545595	MED23-201	mediator of RNA polymerase II transcription subunit 23 isoform X1 [Sus scrofa]	XP_020943629.1
Chr01_23826187_23836101	Pig.06453	2.15279	1.10621	0.0338642	0.300529	yes	up	0.126181	0.125639	0.112865	0.342562	0.125525	0.350187	0.121562	0.272758	VPS13A-201	LOW QUALITY PROTEIN: vacuolar protein sorting-associated protein 13A [Sus scrofa]	XP_020920767.1
Chr01_243632999_243642380	Pig.05180	0.206566	-2.27533	0.0132802	0.199333	yes	down	0.0401487	0.0819388	0.0376217	0.0342562	0	0	0.0532364	0.0114187	PPIL4-201	PREDICTED: peptidyl-prolyl cis-trans isomerase-like 4 isoform X1 [Dasypus novemcinctus]	XP_004752831.1
Chr01_243674267_243679887	Pig.05179,MSTRG.3115	0.157407	-2.66743	0.0307973	0.28746	yes	down	0.0401487	0.0218503	0.0214981	0	0.0132131	0	0.0278324	0.00440438	#N/A	#N/A	#N/A
Chr01_248338604_248340068		0.0657903	-3.92598	0.0239505	0.26345	yes	down	0	0.0382381	0.0161236	0	0	0	0.0181206	0	#N/A	#N/A	#N/A
Chr01_24939833_24945056	Pig.06458	0.299173	-1.74095	0.00717783	0.139465	yes	down	0.0860328	0.0437007	0.0967415	0.0342562	0.0330328	0	0.0754917	0.0224297	PCSK5-203	proprotein convertase subtilisin/kexin type 5 isoform X1 [Sus scrofa]	XP_020920657.1
Chr01_251561636_251563858		0.181805	-2.45953	0.00133872	0.0503588	yes	down	0.0917683	0.114714	0.123614	0.027405	0.0198197	0.0137328	0.110032	0.0203192	#N/A	#N/A	#N/A
Chr01_252818176_252821951	MSTRG.3267,Pig.09649,MSTRG.3268	0.286231	-1.80475	0.00916523	0.158673	yes	down	0.0630907	0.0546259	0.11824	0.0137025	0.0330328	0.0205992	0.0786521	0.0224449	#N/A	#N/A	#N/A
Chr01_25846709_25852197		2.31408	1.21044	0.0150167	0.21086	yes	up	0.0917683	0.0382381	0.0806179	0.198686	0.112312	0.185393	0.0702081	0.165464	#N/A	#N/A	#N/A
Chr01_30290829_30291724		0.341344	-1.5507	0.0416698	0.325257	yes	down	0.0344131	0.092864	0.0214981	0.0137025	0.0132131	0.0274656	0.0495917	0.0181271	#N/A	#N/A	#N/A
Chr01_36216621_36217740	Pig.03295	0.0393519	-4.66742	0.000690194	0.0344758	yes	down	0.0172066	0.0382381	0.0376217	0	0	0	0.0310221	0	GLIS3-201	zinc finger protein GLIS3 isoform X1 [Sus scrofa]	XP_020930038.1
Chr01_37930886_37959001	Pig.03277	6.96324	2.79976	8.26069e-06	0.00166527	yes	up	0.0458842	0.0983266	0.0107491	0.472736	0.303902	0.377653	0.0516533	0.384764	KIAA2026-201	uncharacterized protein KIAA2026 homolog isoform X1 [Sus scrofa]	XP_003121963.3
Chr01_5158032_5164452	Pig.03809	2.29881	1.20089	0.00368745	0.0928568	yes	up	0.108975	0.109252	0.214981	0.171281	0.429427	0.405118	0.144403	0.335275	RAD23B-201	PREDICTED: UV excision repair protein RAD23 homolog B isoform X1 [Pteropus alecto]	XP_001927901.1
Chr01_5158032_5168097	Pig.03809	2.73092	1.44939	1.61039e-06	0.000408904	yes	up	0.315454	0.273129	0.494457	1.05509	0.713509	1.22909	0.361013	0.999229	RAD23B-201	PREDICTED: UV excision repair protein RAD23 homolog B isoform X1 [Pteropus alecto]	XP_001927901.1
Chr01_5163195_5164452	Pig.03809	7.1343	2.83477	0.0338255	0.300529	yes	up	0	0.0109252	0.0322472	0.102769	0.0726723	0.123595	0.0143908	0.0996788	RAD23B-201	PREDICTED: UV excision repair protein RAD23 homolog B isoform X1 [Pteropus alecto]	XP_001927901.1
Chr01_5163195_5168097	Pig.03809	2.84115	1.50648	0.000941863	0.0404205	yes	up	0.11471	0.0491633	0.0967415	0.322008	0.145345	0.288389	0.0868717	0.251914	RAD23B-201	PREDICTED: UV excision repair protein RAD23 homolog B isoform X1 [Pteropus alecto]	XP_001927901.1
Chr01_69483410_69503247	Pig.05374	9.35923	3.22639	0.0264343	0.271196	yes	up	0	0.0109252	0	0.0205537	0.0594591	0.0274656	0.00364172	0.0358262	KTN1-207	kinectin [Sus scrofa]	NP_001245232.1
Chr01_69500313_69509750		19.3064	4.271	0.0144197	0.207249	yes	up	0	0	0	0.027405	0	0.034332	0	0.020579	#N/A	#N/A	#N/A
Chr01_71798631_71831568	Pig.02917	0.0609477	-4.03629	0.00419854	0.0976561	yes	down	0.0229421	0.0109252	0.0268726	0	0	0	0.0202466	0	DDHD1-201	phospholipase DDHD1 isoform X5 [Sus scrofa]	XP_003121845.1
Chr01_72779231_72783251	Pig.02907	0.0327293	-4.93327	0.000441662	0.0264419	yes	down	0.0401487	0.0109252	0.0644943	0	0	0	0.0385227	0	NID2-201	nidogen-2 isoform X1 [Sus scrofa]	XP_020957573.1
Chr01_95256133_95262693		2.05921	1.04209	0.000262608	0.0205171	yes	up	0.378544	0.256742	0.370843	0.753637	0.528526	0.844568	0.335376	0.70891	#N/A	#N/A	#N/A
Chr01_99680098_99684106	Pig.13147	0.0672613	-3.89408	0.00564113	0.116929	yes	down	0.0286776	0	0.0268726	0	0	0	0.0185168	0	PCSK6-201	proprotein convertase subtilisin/kexin type 6 isoform X4 [Sus scrofa]	XP_020954610.1
Chr02_107916545_107923717	Pig.09894	0.0808997	-3.62772	0.049099	1	yes	down	0.011471	0.0218503	0.0107491	0	0	0	0.0146901	0	SBF2-203	myotubularin-related protein 13 isoform X1 [Sus scrofa]	XP_005661188.2
Chr02_116577482_116581813	Pig.05904	0.0856457	-3.54548	0.0156327	0.213878	yes	down	0.0172066	0	0.0268726	0	0	0	0.0146931	0	HPS5	Hermansky-Pudlak syndrome 5 protein [Sus scrofa]	NP_001092073.1
Chr02_129529725_129544183	Pig.12557	3.14142	1.65142	0.00547344	0.11423	yes	up	0.0344131	0.0546259	0.0483708	0.0685124	0.132131	0.254057	0.0458033	0.151567	QSER1-205	glutamine and serine-rich protein 1 [Sus scrofa]	XP_013849914.1
Chr02_138530128_138532718	Pig.12693	0.0770401	-3.69825	0.0249934	0.264427	yes	down	0.0286776	0.0163878	0	0	0	0	0.0150218	0	API5-201	PREDICTED: apoptosis inhibitor 5 isoform X1 [Trichechus manatus latirostris]	XP_004369869.1
Chr02_141182598_141190028		0.051042	-4.29217	0.0405299	1	yes	down	0.0229421	0.0218503	0.0268726	0	0	0	0.0238884	0	#N/A	#N/A	#N/A
Chr02_146743201_146743466	Pig.15343	0.041383	-4.59482	0.00943189	1	yes	down	0.0286776	0.0273129	0.0322472	0	0	0	0.0294126	0	SSRP1-201	PREDICTED: FACT complex subunit SSRP1 isoform X4 [Cebus capucinus imitator]	XP_003353912.1
Chr02_15158593_15165811	Pig.17377	14.7443	3.88208	0.035221	0.306624	yes	up	0	0	0	0.0137025	0	0.034332	0	0.0160115	SEC24A-201	protein transport protein Sec24A [Sus scrofa]	NP_001230853.1
Chr02_15169011_15177107	Pig.17377	29.418	4.87863	0.0104975	1	yes	up	0	0	0	0.0205537	0.0132131	0.0617977	0	0.0318549	SEC24A-201	protein transport protein Sec24A [Sus scrofa]	NP_001230853.1
Chr02_159713586_159713781		0.0387841	-4.68839	7.42298e-05	0.0080778	yes	down	0.556346	0.322293	0.478333	0.027405	0	0.0274656	0.452324	0.0182902	#N/A	#N/A	#N/A
Chr02_159713586_159713945		0.0350696	-4.83364	0.00889734	0.154915	yes	down	0.172066	0.16934	0.193483	0	0	0.0205992	0.178296	0.00686641	#N/A	#N/A	#N/A
Chr02_161624907_161630872	Pig.20939	0.0772071	-3.69512	0.030655	0.28746	yes	down	0.0172066	0.0273129	0	0	0	0	0.0148398	0	EHMT2-201	histone-lysine N-methyltransferase EHMT1 isoform X3 [Sus scrofa]	XP_020936858.1
Chr02_17228457_17230614	Pig.12421	72.3263	6.17645	0.00106298	0.0431855	yes	up	0	0	0	0.0342562	0.092492	0.102996	0	0.0765814	RAD50	DNA repair protein RAD50 [Sus scrofa]	XP_003354322.2
Chr02_18600695_18607910	Pig.12406	6.42566	2.68384	0.00391957	0.0939302	yes	up	0	0	0.0268726	0.0205537	0.046246	0.109863	0.00895755	0.0588874	LYRM7-204	complex III assembly factor LYRM7 isoform X3 [Sus scrofa]	XP_020941079.1
Chr02_2353238_2357829	Pig.11984	0.0285296	-5.1314	0.000788833	0.0375558	yes	down	0.0573552	0.0273129	0.0429962	0	0	0	0.0425548	0	HTR4-204	5-hydroxytryptamine receptor 4 [Sus scrofa]	NP_001001267.1
Chr02_37935438_37948678		0.155456	-2.68543	0.0134311	0.20061	yes	down	0.0802973	0.0163878	0.0268726	0	0	0.0205992	0.0411859	0.00686641	#N/A	#N/A	#N/A
Chr02_430051_433856	Pig.19916	0.214142	-2.22336	0.0299993	0.28746	yes	down	0.0344131	0.0437007	0.0483708	0.027405	0	0	0.0421615	0.00913499	DCTN4-202	dynactin subunit 4 [Sus scrofa]	NP_001231236.1
Chr02_82934874_82936323	Pig.19543	0.0904036	-3.46748	0.0232707	0.262543	yes	down	0	0.0382381	0	0	0	0	0.012746	0	LDLR-201	low-density lipoprotein receptor precursor [Sus scrofa]	NP_001193283.1
Chr02_92989110_93068632	Pig.06424	1.96979e-05	-15.6316	0.0076514	0.140653	yes	down	0.011471	0	0	0	0	0	0.00382368	0	CYP4F8-201	cytochrome P450, family 4, subfamily F, polypeptide 55 isoform X3 [Sus scrofa]	XP_020935397.1
Chr02_93039238_93079314	Pig.06424	7.98526	2.99734	0.000582069	0.0316708	yes	up	0	0.0327755	0.0483708	0.232942	0.383181	0	0.0270488	0.205374	CYP4F8-201	cytochrome P450, family 4, subfamily F, polypeptide 55 isoform X3 [Sus scrofa]	XP_020935397.1
Chr02_95298630_95299695	Pig.06350	0.158221	-2.65999	0.022317	0.26017	yes	down	0.0401487	0.0163878	0.0268726	0	0	0.0137328	0.027803	0.00457761	MAST3-201	microtubule-associated serine/threonine-protein kinase 3 isoform X3 [Sus scrofa]	XP_020939140.1
Chr02_9898233_9909798	MSTRG.3627,Pig.20189	0.0939227	-3.41238	0.039205	0.3157	yes	down	0	0.0273129	0.0107491	0	0	0	0.0126873	0	#N/A	#N/A	#N/A
Chr03_108726174_108734617	Pig.18781	2.94736	1.55942	0.0273114	0.274348	yes	up	0	0.0273129	0.0806179	0.0959174	0.092492	0.123595	0.035977	0.104002	PARN-202	poly(A)-specific ribonuclease PARN isoform X1 [Sus scrofa]	XP_020942220.1(poly
Chr03_111561487_111565521	Pig.11639	0.064013	-3.96549	0.0328679	1	yes	down	0.011471	0.0109252	0.0376217	0	0	0	0.020006	0	SMG1-201	serine/threonine-protein kinase SMG1 isoform X1 [Sus scrofa]	XP_020942206.1
Chr03_116800433_116800867	Pig.16768	2.28693	1.19341	0.000416407	0.0258937	yes	up	0.21795	0.174803	0.499831	0.465885	0.548345	1.04369	0.297528	0.685975	TNRC6C-202	trinucleotide repeat-containing gene 6A protein isoform X4 [Sus scrofa]	XP_020936978.1
Chr03_123462666_123463611		0.119906	-3.06003	0.0386113	0.315412	yes	down	0.0286776	0.0327755	0.0537453	0.0137025	0	0	0.0383995	0.0045675	#N/A	#N/A	#N/A
Chr03_133252062_133267489	Pig.09040	0.0526509	-4.2474	0.0365946	0.312336	yes	down	0.0344131	0	0.0376217	0	0	0	0.0240116	0	TAF1B-201	TATA box-binding protein-associated factor RNA polymerase I subunit B isoform X1 [Sus scrofa]	XP_020943517.1
Chr03_133654793_133680380	MSTRG.10349,Pig.09034	0.066799	-3.90403	0.0423769	0.325257	yes	down	0.011471	0.0218503	0.0214981	0	0	0	0.0182732	0	#N/A	#N/A	#N/A
Chr03_19945644_19949910	Pig.20029	0.0444308	-4.4923	0.00101954	0.0419804	yes	down	0.0229421	0.0273129	0.0322472	0	0	0	0.0275007	0	DTNB	dystrobrevin beta isoform X1 [Sus scrofa]	XP_020943401.1
Chr03_20352519_20375493	Pig.20026	3.3607	1.74876	0.0148269	0.21086	yes	up	0.0172066	0.0382381	0.0161236	0.102769	0.046246	0.102996	0.0238561	0.0840036	RAB10-203	ras-related protein Rab-10 [Mus musculus]	NP_057885.1
Chr03_41590113_41591145	Pig.08256	25.9767	4.69914	0.020888	1	yes	up	0	0	0	0.0342562	0.0132131	0.034332	0	0.0272671	PSME4-202	proteasome activator complex subunit 4 isoform X1 [Sus scrofa]	XP_003125198.5
Chr03_45601718_45637098	MSTRG.8253,Pig.04789,MSTRG.8254	0.418986	-1.25503	0.00431666	0.0988936	yes	down	0.189272	0.0600885	0.0967415	0.0411075	0.046246	0.0617977	0.115367	0.049717	#N/A	#N/A	#N/A
Chr03_57680783_57732712	Pig.04872	35.3228	5.14253	0.0157051	0.213878	yes	up	0	0	0	0.0342562	0.0594591	0.0137328	0	0.0358161	ZNF638-202	zinc finger protein 638 isoform X4 [Sus scrofa]	XP_005662532.1
Chr03_57686609_57732712	Pig.04872	49.0332	5.61569	0.0011214	0.0433706	yes	up	0	0	0	0.0685124	0.0660657	0.0137328	0	0.049437	ZNF638-202	zinc finger protein 638 isoform X4 [Sus scrofa]	XP_005662532.1
Chr03_59785632_59813718	Pig.11488	22.3766	4.48392	0.00775968	0.141579	yes	up	0	0	0	0.0342562	0.0330328	0	0	0.0224297	ALMS1-201	Alstrom syndrome protein 1 isoform X5 [Sus scrofa]	XP_005662521.1
Chr03_71892828_71898777	Pig.13433	2.94925	1.56035	0.000779978	0.0375558	yes	up	0.275305	0.16934	0.40309	0.897513	0.67387	0.933832	0.282578	0.835072	UXS1-201	UDP-glucuronic acid decarboxylase 1 isoform b [Sus scrofa]	NP_001231703.1
Chr03_76247636_76248435	Pig.09468,MSTRG.8682	0.229894	-2.12096	0.00384485	0.0939302	yes	down	0.0745618	0.0874014	0.0698689	0.0411075	0.0132131	0	0.0772773	0.0181069	#N/A	#N/A	#N/A
Chr03_77822466_77838469	MSTRG.8700,Pig.09456	0.167466	-2.57806	0.0307476	0.28746	yes	down	0.0401487	0.0491633	0.0268726	0	0.0198197	0	0.0387282	0.00660657	#N/A	#N/A	#N/A
Chr03_77822466_77840328	MSTRG.8700,Pig.09456	0.349951	-1.51477	0.0046818	0.103984	yes	down	0.11471	0.114714	0.0859925	0.027405	0.0330328	0.0549313	0.105139	0.0384564	#N/A	#N/A	#N/A
Chr03_82677671_82678584	Pig.09378	0.331711	-1.592	0.0190205	0.233576	yes	down	0.0458842	0.0437007	0.0698689	0.0137025	0	0.0411985	0.0531512	0.0183003	TGOLN2	PREDICTED: trans-Golgi network integral membrane protein 2-like [Balaenoptera acutorostrata scammoni]	XP_022411752.1
Chr03_84636714_84655608	Pig.13165	21.4846	4.42523	0.00948989	0.162448	yes	up	0	0.0109252	0	0.027405	0.118918	0.109863	0.00364172	0.0853953	ZC3H6-201	zinc finger CCCH domain-containing protein 6 [Sus scrofa]	XP_020942684.1
Chr03_84651591_84655608	Pig.13165	62.4672	5.96503	0.00201917	0.0676091	yes	up	0	0	0	0.027405	0.0396394	0.137328	0	0.0681242	ZC3H6-201	zinc finger CCCH domain-containing protein 6 [Sus scrofa]	XP_020942684.1
Chr03_93501289_93506356	Pig.09207	0.0598582	-4.06231	0.0179752	1	yes	down	0.0286776	0.0109252	0.0214981	0	0	0	0.020367	0	POM121	LOW QUALITY PROTEIN: nuclear envelope pore membrane protein POM 121C [Sus scrofa]	XP_003124468.3
Chr03_94677157_94679723	Pig.09232	0.0843899	-3.56679	0.031929	0.289424	yes	down	0.0229421	0	0.0214981	0	0	0	0.0148134	0	GTF2I-206	general transcription factor II-I isoform X1 [Sus scrofa]	XP_005662046.1
Chr03_97785863_97797486		0.307364	-1.70198	0.00359237	0.0912162	yes	down	0.0975039	0.0983266	0.134363	0.0479587	0.0528526	0	0.110065	0.0336038	#N/A	#N/A	#N/A
Chr04_105104731_105126008	Pig.01674	0.0695124	-3.84659	0.0117012	0.185696	yes	down	0.011471	0.0382381	0	0	0	0	0.0165697	0	SLC30A7-202	PREDICTED: zinc transporter 7 [Ceratotherium simum simum]	NP_001129683.1
Chr04_105955370_105988484	Pig.01686,MSTRG.12330	0.0240402	-5.37841	0.00164558	0.0581569	yes	down	0.825915	0.753837	0.0376217	0.0411075	0	0	0.539125	0.0137025	#N/A	#N/A	#N/A
Chr04_110746736_110758056	Pig.01703,MSTRG.12387	13.2761	3.73076	0.0120329	0.188022	yes	up	0	0	0	0.027405	0.0132131	0	0	0.0135394	#N/A	#N/A	#N/A
Chr04_110994123_110999920	Pig.01705	0.188027	-2.41099	0.0385671	0.315412	yes	down	0.0458842	0.0109252	0.0483708	0	0	0.0205992	0.03506	0.00686641	ARHGAP29-201	rho GTPase-activating protein 29 [Sus scrofa]	XP_005663713.1
Chr04_111830354_111849701	Pig.01713	22.5154	4.49284	0.048122	1	yes	up	0	0	0	0.0342562	0.0330328	0	0	0.0224297	CCDC18-201	coiled-coil domain-containing protein 18 isoform X1 [Sus scrofa]	XP_020945847.1
Chr04_112432957_112452095	Pig.01720	0.0721799	-3.79226	0.0215256	0.25466	yes	down	0.011471	0	0.0429962	0	0	0	0.0181558	0	EVI5-208	ecotropic viral integration site 5 protein homolog isoform X4 [Sus scrofa]	XP_020945870.1
Chr04_117055265_117065883	MSTRG.12519,Pig.01753	0.0600591	-4.05747	0.00962558	0.162989	yes	down	0.0229421	0.0163878	0.0214981	0	0	0	0.020276	0	#N/A	#N/A	#N/A
Chr04_26383601_26385684	Pig.08086	3.91331	1.96839	0.0314057	0.288232	yes	up	0	0.0163878	0.0107491	0.0479587	0.0396394	0.0205992	0.00904561	0.0360658	UBR5-201	E3 ubiquitin-protein ligase UBR5 isoform X2 [Sus scrofa]	XP_020944690.1
Chr04_30299278_30309026	Pig.08107	19.2235	4.2648	0.00336443	0.0883744	yes	up	0	0	0	0.0137025	0.0132131	0.034332	0	0.0204159	OXR1-205	oxidation resistance protein 1 isoform X4 [Sus scrofa]	XP_013852007.1
Chr04_36801646_36805402	Pig.01495	3.31391	1.72853	0.0448215	0.332537	yes	up	0.0286776	0.0710136	0.0537453	0.130174	0.184984	0.212859	0.0511455	0.176005	WWP1-201	NEDD4-like E3 ubiquitin-protein ligase WWP1 isoform X1 [Sus scrofa]	XP_005663042.1
Chr04_36821977_36836417	Pig.01495	2.81003	1.49059	0.00761032	0.140653	yes	up	0.172066	0.0983266	0.214981	0.589207	0.403001	0.36392	0.161791	0.452042	WWP1-201	NEDD4-like E3 ubiquitin-protein ligase WWP1 isoform X1 [Sus scrofa]	XP_005663042.1
Chr04_48646096_48666494	Pig.01448	0.0934305	-3.41996	0.0254166	0.266051	yes	down	0.0172066	0.0109252	0.0107491	0	0	0	0.0129603	0	STAU2-203	double-stranded RNA-binding protein Staufen homolog 2 isoform X7 [Sus scrofa]	XP_020944868.1
Chr04_57443192_57444790	Pig.19195,MSTRG.11078	0.122467	-3.02954	0.00739602	0.139973	yes	down	0.0688263	0.0710136	0.0107491	0	0	0.0205992	0.0501963	0.00686641	#N/A	#N/A	#N/A
Chr04_59200171_59206911	Pig.14064	0.458462	-1.12512	0.00509447	0.110878	yes	down	0.120446	0.136565	0.22573	0.0822149	0.0594591	0.0823969	0.160914	0.0746903	CHD7-201	chromodomain-helicase-DNA-binding protein 7 isoform X1 [Sus scrofa]	XP_020944993.1
Chr04_64703098_64703528		2.51096	1.32824	0.0390876	0.3157	yes	up	0.0286776	0.0382381	0.0752434	0.137025	0.0594591	0.164794	0.0473864	0.120426	#N/A	#N/A	#N/A
Chr04_64703098_64717765		4.04003	2.01437	0.00723676	0.139465	yes	up	0	0.0109252	0.0967415	0.10962	0.158558	0.144195	0.0358889	0.137457	#N/A	#N/A	#N/A
Chr04_80611471_80623684	Pig.10548	0.457348	-1.12864	0.0313704	0.288232	yes	down	0.108975	0.120177	0.102116	0.0685124	0.0396394	0.0480649	0.110423	0.0520722	CCT3-202	T-complex protein 1 subunit gamma [Sus scrofa]	NP_001231109.1
Chr04_81240281_81262538	Pig.10524	0.0539402	-4.2125	0.00382626	0.0939302	yes	down	0.0344131	0.0163878	0.0161236	0	0	0	0.0223082	0	ASH1L-201	histone-lysine N-methyltransferase ASH1L isoform X1 [Sus scrofa]	XP_020945350.1
Chr04_81276788_81289066	Pig.10524	2.52705	1.33745	0.00033069	0.0240332	yes	up	0.16633	0.234891	0.193483	0.308306	0.502099	0.769038	0.198235	0.526481	ASH1L-201	histone-lysine N-methyltransferase ASH1L isoform X1 [Sus scrofa]	XP_020945350.1
Chr04_81477534_81477997	Pig.10515,MSTRG.11588	0.0218319	-5.51742	0.0001218	0.0119717	yes	down	0.0688263	0.0437007	0.0537453	0	0	0	0.0554241	0	#N/A	#N/A	#N/A
Chr04_84437367_84462038	Pig.18107	0.375782	-1.41203	0.0360255	0.310962	yes	down	0.0802973	0.0764762	0.0322472	0.0342562	0.0132131	0.0274656	0.0630069	0.0249783	SNX27-201	sorting nexin-27 [Bos taurus]	XP_003125809.1
Chr04_84654052_84655582		0.104788	-3.25445	0.0370227	0.31362	yes	down	0.0172066	0.0163878	0	0	0	0	0.0111981	0	#N/A	#N/A	#N/A
Chr04_95470793_95480329	Pig.01584,MSTRG.12126	0.0455273	-4.45712	0.00249883	0.0779692	yes	down	0.0172066	0.0491633	0.0107491	0	0	0	0.0257063	0	#N/A	#N/A	#N/A
Chr04_9772083_9785803		6.78883	2.76316	0.000153732	0.0143306	yes	up	0.0172066	0.0273129	0.0376217	0.246645	0.184984	0.123595	0.0273804	0.185075	#N/A	#N/A	#N/A
Chr04_99003795_99006790	Pig.01657	16.5658	4.05014	0.0286181	0.283115	yes	up	0	0	0	0	0.0132131	0.0411985	0	0.0181372	STXBP3-201	syntaxin-binding protein 3 [Sus scrofa]	XP_020945765.1
Chr05_104214626_104274170	MSTRG.14747	0.041072	-4.6057	0.00270409	0.0779692	yes	down	0.0286776	0.0546259	0	0	0	0	0.0277678	0	0	0	XP_020947997.1
Chr05_104253525_104274170	MSTRG.14747	0.130551	-2.93731	0.0227276	0.260617	yes	down	0.0975039	0	0	0	0.0132131	0	0.0325013	0.00440438	0	0	XP_020947997.1
Chr05_11194767_11207749	Pig.07621	3.47917	1.79874	0.0383419	0.315412	yes	up	0.011471	0.0273129	0.0322472	0.0616612	0.0330328	0.164794	0.0236771	0.086496	LARP4-202	la-related protein 4 isoform X1 [Sus scrofa]	XP_020947303.1
Chr05_21900001_21912003	Pig.14007	0.221055	-2.17752	0.00754451	0.140653	yes	down	0.120446	0.114714	0.0537453	0.027405	0.0132131	0.0274656	0.0963019	0.0226946	ATXN10-201	ataxin-10 isoform X1 [Sus scrofa]	XP_013852916.2
Chr05_21900001_21921463	Pig.14007	0.0391615	-4.67442	0.00310983	0.084604	yes	down	0.0458842	0.0327755	0.0107491	0	0	0	0.0298029	0	ATXN10-201	ataxin-10 isoform X1 [Sus scrofa]	XP_013852916.2
Chr05_28548500_28555802	Pig.17267	3.35827	1.74772	0.0492612	0.34796	yes	up	0.0745618	0.0218503	0.0161236	0.205537	0.0792788	0.109863	0.0375119	0.13156	PTGES3-201	PREDICTED: prostaglandin E synthase 3 isoform X1 [Mustela putorius furo]	TEA31711.1
Chr05_36457974_36459199	Pig.05498	0.210665	-2.24698	0.0306881	0.28746	yes	down	0.0229421	0.0710136	0.0268726	0	0.0132131	0.0137328	0.0402761	0.00898199	RAB3IP	rab-3A-interacting protein isoform X1 [Sus scrofa]	XP_020947636.1
Chr05_42398007_42403290	MSTRG.13728,Pig.20735	0.369949	-1.4346	0.0195273	0.235176	yes	down	0.0745618	0.092864	0.0806179	0.0342562	0.0198197	0.0411985	0.0826812	0.0317581	#N/A	#N/A	#N/A
Chr05_43729794_43744217	Pig.06613	7.38111	2.88384	0.02986	0.28746	yes	up	0	0	0.0214981	0.0753637	0.0396394	0.034332	0.00716604	0.0497784	FGD4	FYVE, RhoGEF and PH domain-containing protein 4 isoform X1 [Sus scrofa]	XP_020947725.1
Chr05_44746479_44761669	Pig.06608	0.217289	-2.20231	0.0308498	0.28746	yes	down	0.0401487	0.0382381	0.0429962	0.0137025	0	0.0137328	0.040461	0.0091451	DENND5B-201	DENN domain-containing protein 5B isoform X1 [Sus scrofa]	XP_020947749.1
Chr05_554154_555152	Pig.18444	21.1036	4.39941	0.0204175	1	yes	up	0	0	0	0.0137025	0.0132131	0.0411985	0	0.0227047	XPNPEP3-201	probable Xaa-Pro aminopeptidase 3 isoform X1 [Sus scrofa]	XP_020947124.1
Chr05_60053380_60062312	Pig.09568	4.8797	2.28679	3.48506e-05	0.00482681	yes	up	0.11471	0.185728	0.0429962	0.335711	0.706903	0.775904	0.114478	0.606173	ATF7IP-202	activating transcription factor 7-interacting protein 1 isoform X1 [Sus scrofa]	XP_005664117.1
Chr05_61728003_61728231	Pig.18710	0.0112389	-6.47536	1.57962e-06	0.000408904	yes	down	0.0745618	0.174803	0.0644943	0	0	0	0.10462	0	PTMS	PREDICTED: parathymosin, partial [Camelus bactrianus]	XP_010956138.1
Chr05_61728003_61728261	Pig.18710	0.0939342	-3.41221	0.0380719	0.315412	yes	down	0	0.0273129	0.0107491	0	0	0	0.0126873	0	PTMS	PREDICTED: parathymosin, partial [Camelus bactrianus]	XP_010956138.1
Chr05_66482660_66483451	Pig.07502	0.0729186	-3.77757	0.042491	1	yes	down	0.011471	0	0.0429962	0	0	0	0.0181558	0	RAD52-201	DNA repair protein RAD52 homolog isoform X1 [Sus scrofa]	XP_013853315.1
Chr05_66635943_66647337	Pig.07503	0.0976411	-3.35637	0.0239622	0.26345	yes	down	0	0.0163878	0.0214981	0	0	0	0.0126286	0	ERC1-203	ELKS/Rab6-interacting/CAST family member 1 isoform X3 [Sus scrofa]	XP_020948632.1
Chr05_66678018_66707603	Pig.07503	0.0733546	-3.76897	0.0080238	0.145527	yes	down	0.0172066	0.0163878	0.0161236	0	0	0	0.0165726	0	ERC1-203	ELKS/Rab6-interacting/CAST family member 1 isoform X3 [Sus scrofa]	XP_020948632.1
Chr05_66680893_66707603	Pig.07503	0.112025	-3.1581	0.0367903	0.313129	yes	down	0.0172066	0	0.0161236	0	0	0	0.0111101	0	ERC1-203	ELKS/Rab6-interacting/CAST family member 1 isoform X3 [Sus scrofa]	XP_020948632.1
Chr05_75858259_75868552	MSTRG.14257	0.0389748	-4.68131	0.0192739	0.233576	yes	down	0.011471	0.0491633	0.0322472	0	0	0	0.0309605	0	0	0	XP_020948239.1
Chr05_77982195_77984053	Pig.13107	0.0883416	-3.50076	0.0423047	0.325257	yes	down	0.0172066	0.0218503	0	0	0	0	0.013019	0	WASHC4-201	LOW QUALITY PROTEIN: WASH complex subunit 4 [Sus scrofa]	XP_020948284.1
Chr05_84175407_84176240	MSTRG.14449,Pig.04063	0.36291	-1.46232	0.00273801	0.0779692	yes	down	0.309718	0.365993	0.424588	0.150727	0.118918	0.137328	0.366766	0.135658	#N/A	#N/A	#N/A
Chr05_93249552_93256413		2.58651	1.37101	0.0118696	0.186427	yes	up	0.0860328	0.136565	0.0644943	0.253496	0.264263	0.260924	0.0956973	0.259561	#N/A	#N/A	#N/A
Chr06_10669614_10673196		0.0405205	-4.62521	0.0322037	1	yes	down	0.0458842	0.0163878	0.0268726	0	0	0	0.0297149	0	#N/A	#N/A	#N/A
Chr06_117805683_117808196	Pig.20051	0.434643	-1.2021	0.0382233	0.315412	yes	down	0.252363	0.267667	0.214981	0.0959174	0.132131	0.102996	0.245004	0.110348	GYS1-201	glycogen [starch]	NP_001182437.1
Chr06_125957384_125972374		0.0827093	-3.59581	0.0397149	0.317615	yes	down	0.0172066	0.0109252	0.0161236	0	0	0	0.0147518	0	#N/A	#N/A	#N/A
Chr06_12677380_12679356	Pig.12446	50.9856	5.67202	0.00112448	0.0433706	yes	up	0	0	0	0.0753637	0.0528526	0.0274656	0	0.051894	USP24-201	ubiquitin carboxyl-terminal hydrolase 24 isoform X1 [Sus scrofa]	XP_020953471.1
Chr06_127927287_127934404	Pig.15970	0.0348131	-4.84423	0.00394587	0.0939302	yes	down	0.0688263	0.0163878	0.0161236	0	0	0	0.0337792	0	UBA2	PREDICTED: SUMO-activating enzyme subunit 2 [Vicugna pacos]	XP_006217089.1
Chr06_134537417_134576704	MSTRG.18159,Pig.13994	0.231103	-2.11339	0.000442579	0.0264419	yes	down	0.108975	0.158415	0.0967415	0.0205537	0.0330328	0.034332	0.121377	0.0293062	#N/A	#N/A	#N/A
Chr06_137047252_137058066	Pig.15005	0.055492	-4.17158	0.0297126	0.28746	yes	down	0.0229421	0.0382381	0	0	0	0	0.0203934	0	HEATR3-201	HEAT repeat-containing protein 3 isoform X1 [Sus scrofa]	XP_020949878.1
Chr06_142687539_142700706	Pig.14286	0.359901	-1.47433	0.00160563	0.0580657	yes	down	0.131917	0.109252	0.161236	0.0137025	0.0528526	0.0823969	0.134135	0.0496507	NUDT21-201	cleavage and polyadenylation specificity factor subunit 5 [Sus scrofa]	NP_001231176.1
Chr06_143795848_143796187		0.0709611	-3.81683	0.031953	0.289424	yes	down	0.0286776	0.0109252	0.0107491	0	0	0	0.0167839	0	#N/A	#N/A	#N/A
Chr06_154483498_154503554	Pig.12809	0.0417546	-4.58192	0.000689394	0.0344758	yes	down	0.0401487	0.0109252	0.0376217	0	0	0	0.0295652	0	SNTB2-201	beta-2-syntrophin [Bos taurus]	XP_026350890.1
Chr06_154848646_154873428	Pig.12817	15.5179	3.95586	0.0332986	1	yes	up	0	0	0	0.0137025	0.0330328	0	0	0.0155784	NFAT5-203	nuclear factor of activated T-cells 5 isoform X3 [Sus scrofa]	XP_003355818.1
Chr06_168166374_168177472	Pig.15511	0.394795	-1.34083	0.0473385	0.341802	yes	down	0.126181	0.0874014	0.0429962	0.0205537	0.0330328	0.0549313	0.0855264	0.0361726	USP10-201	ubiquitin carboxyl-terminal hydrolase 10 isoform X2 [Sus scrofa]	XP_020949384.1
Chr06_168366746_168367587	Pig.15509	0.167997	-2.5735	0.00525525	0.112656	yes	down	0.0573552	0.0600885	0.0752434	0	0	0.034332	0.064229	0.011444	ZDHHC7-203	palmitoyltransferase ZDHHC7 [Sus scrofa]	XP_003126871.1
Chr06_168400991_168401622		46.8218	5.54911	0.00766274	0.140653	yes	up	0	0	0	0.0479587	0.0198197	0.0823969	0	0.0500584	#N/A	#N/A	#N/A
Chr06_168903984_168904202	Pig.15506	4.45222	2.15452	0.0463911	0.33736	yes	up	0.0172066	0	0.0322472	0.0411075	0.0198197	0.164794	0.0164846	0.0752403	GSE1-202	genetic suppressor element 1 isoform X4 [Sus scrofa]	XP_020949369.1
Chr06_2639450_2674494	Pig.12657	0.328652	-1.60537	0.0229761	0.261303	yes	down	0.0688263	0.0437007	0.0698689	0.0137025	0.0330328	0.0137328	0.0607986	0.0201561	ERI3-203	ERI1 exoribonuclease 3 isoform X1 [Sus scrofa]	XP_020952446.1
Chr06_31134444_31151568	Pig.05297	29.947	4.90434	0.017248	1	yes	up	0	0	0	0.0205537	0.0330328	0.0411985	0	0.031595	LRRIQ3-201	leucine-rich repeat and IQ domain-containing protein 3 isoform X1 [Sus scrofa]	XP_020952137.1
Chr06_32608626_32620129	Pig.05306	10.1485	3.3432	0.0474858	0.341992	yes	up	0	0	0.0161236	0.027405	0.0726723	0.0549313	0.00537453	0.0516695	ACADM-205	RecName: Full=Medium-chain specific acyl-CoA dehydrogenase, mitochondrial; Short=MCAD; Flags: PrecursorAAW30430.1 medium-chain acyl-coA dehydrogenase [Sus scrofa]	P41367.3
Chr06_34853086_34869087	MSTRG.15466,Pig.02745	0.0573149	-4.12495	0.0225554	1	yes	down	0.0401487	0.0109252	0.0107491	0	0	0	0.0206076	0	#N/A	#N/A	#N/A
Chr06_34870541_34874753	MSTRG.15466,Pig.02745	0.314883	-1.66711	0.0390117	0.3157	yes	down	0.0802973	0.0710136	0.0322472	0.0342562	0	0.0274656	0.061186	0.020574	#N/A	#N/A	#N/A
Chr06_49667205_49680000	Pig.02792	3.56358	1.83333	0.0312329	0.288232	yes	up	0.0401487	0.0546259	0.0591198	0.150727	0.138738	0.281523	0.0512981	0.190329	FHOD3-206	FH1/FH2 domain-containing protein 3 isoform X2 [Sus scrofa]	XP_020951933.1
Chr06_59614387_59640281	Pig.03617	0.305731	-1.70967	0.0156248	0.213878	yes	down	0.0458842	0.0327755	0.0752434	0.0205537	0.0132131	0.0137328	0.051301	0.0158332	SS18-203	PREDICTED: protein SSXT [Otolemur garnettii]	XP_004742918.1
Chr06_61228450_61234606	MSTRG.15623,Pig.03622	0.109932	-3.18531	0.0269833	0.27315	yes	down	0.0229421	0	0.0107491	0	0	0	0.0112304	0	#N/A	#N/A	#N/A
Chr06_61228450_61260684	MSTRG.15623,Pig.03622	0.0777148	-3.68567	0.0248134	0.264427	yes	down	0.011471	0.0327755	0	0	0	0	0.0147489	0	#N/A	#N/A	#N/A
Chr06_61228450_61283077	MSTRG.15623,Pig.03622	0.155864	-2.68164	0.00285968	0.0799399	yes	down	0.0286776	0.0600885	0.0806179	0	0	0.0274656	0.0564613	0.00915521	#N/A	#N/A	#N/A
Chr06_61249444_61283077	MSTRG.15623,Pig.03622	0.174302	-2.52034	0.0181705	0.228783	yes	down	0.011471	0.0546259	0.0483708	0	0.0198197	0	0.0381559	0.00660657	#N/A	#N/A	#N/A
Chr06_6319537_6337357	Pig.12596	0.071351	-3.80892	0.0220699	0.258642	yes	down	0.0229421	0.0163878	0.0107491	0	0	0	0.016693	0	SPATA6-201	spermatogenesis-associated protein 6 [Sus scrofa]	NP_001171388.1
Chr06_63443339_63485048	Pig.03641	0.457075	-1.1295	0.0339292	0.300529	yes	down	0.108975	0.29498	0.0537453	0.102769	0.0528526	0.0686641	0.152567	0.0747618	MIB1-201	PREDICTED: E3 ubiquitin-protein ligase MIB1 [Oryctolagus cuniculus]	XP_002713497.1
Chr06_63650554_63671201		20.6622	4.36892	3.23671e-05	0.00469631	yes	up	0.0172066	0.0163878	0	0.191835	0.244443	0.308988	0.0111981	0.248422	#N/A	#N/A	#N/A
Chr06_63650554_63691247		115.365	6.85006	8.74445e-06	0.00166527	yes	up	0	0	0	0.0822149	0.118918	0.164794	0	0.121976	#N/A	#N/A	#N/A
Chr06_63650554_63715863		49.087	5.61727	0.0274351	1	yes	up	0	0	0	0.0205537	0.0726723	0.0617977	0	0.0516746	#N/A	#N/A	#N/A
Chr06_63668723_63715863		95.0344	6.57038	0.0354386	0.30764	yes	up	0	0	0	0.10962	0.0660657	0.123595	0	0.0997603	#N/A	#N/A	#N/A
Chr06_66564283_66595285	Pig.03664	59.2992	5.88994	0.000222861	0.0188627	yes	up	0	0	0	0.0822149	0.0528526	0.0480649	0	0.0610441	SMCHD1-201	structural maintenance of chromosomes flexible hinge domain-containing protein 1 isoform X1 [Sus scrofa]	XP_020951796.1
Chr06_71718259_71725788	Pig.03686	0.200637	-2.31734	0.0227516	0.260617	yes	down	0.0917683	0.0218503	0.0107491	0	0	0.0274656	0.0414559	0.00915521	NDUFV2-202	NADH dehydrogenase [ubiquinone]	NP_001090944.2
Chr06_71800142_71818899	Pig.03687	0.106919	-3.2254	0.0237325	0.26345	yes	down	0.0229421	0.0109252	0	0	0	0	0.0112891	0	ANKRD12-201	ankyrin repeat domain-containing protein 12 isoform X1 [Sus scrofa]	XP_020951722.1
Chr06_79088008_79100251	Pig.03010	0.462981	-1.11098	0.0258439	0.267845	yes	down	0.0860328	0.109252	0.193483	0.0411075	0.0396394	0.102996	0.129589	0.0612477	ZMYM4-201	zinc finger MYM-type protein 4 isoform X2 [Sus scrofa]	XP_020951559.1
Chr06_81552679_81556789		0.265994	-1.91053	0.00428466	0.0988936	yes	down	0.0688263	0.0874014	0.0376217	0	0.0264263	0.0274656	0.0646164	0.017964	#N/A	#N/A	#N/A
Chr07_101834903_101836115	Pig.08853	5.18689	2.37487	0.0169658	0.219233	yes	up	0.0344131	0.0273129	0.0483708	0.0616612	0.25105	0.274656	0.0366989	0.195789	WHAMM-201	WASP homolog-associated protein with actin, membranes and microtubules [Sus scrofa]	XP_001927350.1
Chr07_108006972_108018158		15.6803	3.97088	0.0242972	0.264405	yes	up	0	0	0	0.027405	0.0198197	0	0	0.0157416	#N/A	#N/A	#N/A
Chr07_123110937_123127062		0.0363818	-4.78064	0.00352912	0.0904753	yes	down	0.0401487	0.0273129	0.0322472	0	0	0	0.0332363	0	#N/A	#N/A	#N/A
Chr07_125133345_125157395	Pig.13357	0.245501	-2.0262	0.0047436	0.103984	yes	down	0.189272	0.131102	0.257977	0.0479587	0.0528526	0.0411985	0.192784	0.0473366	MLIP-201	muscular LMNA-interacting protein isoform X3 [Sus scrofa]	XP_020954178.1
Chr07_127317226_127328596	Pig.11473	0.190831	-2.38963	0.0142655	0.206004	yes	down	0.0401487	0.131102	0.139738	0	0.0330328	0.0274656	0.103663	0.0201662	Tnxb	tenascin-X isoform X5 [Sus scrofa]	XP_020953995.1
Chr07_127317226_127334618	Pig.11473	109.254	6.77154	0.0192958	0.233576	yes	up	0	0	0	0.205537	0.118918	0	0	0.108152	Tnxb	tenascin-X isoform X5 [Sus scrofa]	XP_020953995.1
Chr07_128486884_128504793		0.259409	-1.9467	0.0398779	0.318083	yes	down	0.0458842	0.0327755	0.0483708	0	0.0198197	0.0137328	0.0423435	0.0111842	#N/A	#N/A	#N/A
Chr07_14949441_14963117	MSTRG.19316,Pig.06792	17.2731	4.11046	0.0290084	1	yes	up	0	0	0	0.027405	0	0.0274656	0	0.0182902	#N/A	#N/A	#N/A
Chr07_29778850_29779243		0.0564346	-4.14728	5.2753e-05	0.00636736	yes	down	14.3617	12.4929	20.5683	0.582356	0.766362	1.41448	15.8077	0.921066	#N/A	#N/A	#N/A
Chr07_33729425_33731575	Pig.19099	2.69027	1.42775	0.0085662	0.152639	yes	up	0.108975	0	0.0752434	0.116471	0.125525	0.26779	0.0614061	0.169929	PAPOLA-201	poly(A) polymerase alpha isoform X4 [Sus scrofa]	XP_001929110.1(poly
Chr07_35015014_35023525	Pig.20280	0.0741692	-3.75304	0.030411	0.28746	yes	down	0.0401487	0.0874014	0.0537453	0.0137025	0	0	0.0604318	0.0045675	DICER1-203	endoribonuclease Dicer isoform X1 [Sus scrofa]	XP_020953825.1
Chr07_36723571_36725562		0.241364	-2.05072	5.43326e-05	0.00636736	yes	down	0.120446	0.125639	0.139738	0.05481	0.0198197	0.0205992	0.128608	0.031743	#N/A	#N/A	#N/A
Chr07_5561084_5568809	Pig.15440,MSTRG.19214	0.0729802	-3.77635	0.0303026	0.28746	yes	down	0.0172066	0.0163878	0.0161236	0	0	0	0.0165726	0	#N/A	#N/A	#N/A
Chr07_56816124_56823334	Pig.04349	0.0983619	-3.34576	0.0371569	0.31362	yes	down	0	0.0163878	0.0214981	0	0	0	0.0126286	0	SIPA1L1-201	signal-induced proliferation-associated 1-like protein 1 isoform X1 [Sus scrofa]	XP_005656429.1
Chr07_65935765_65977597	MSTRG.20331,Pig.04276	0.258435	-1.95213	0.0157439	0.213878	yes	down	0.0229421	0.0710136	0.0591198	0.0205537	0	0.0205992	0.0510252	0.0137177	#N/A	#N/A	#N/A
Chr07_78284059_78313084	MSTRG.20541	0.000834552	-10.2267	0.000363233	0.0245699	yes	down	1.75507	1.98292	0.365468	0	0	0	1.36782	0	0	0	XP_020954893.1
Chr07_78295549_78323727	MSTRG.20541	4.38622e-08	-24.4424	0.000650792	0.0341197	yes	down	0.195008	0	0	0	0	0	0.0650026	0	0	0	XP_020954893.1
Chr07_85427777_85452842	Pig.08415	25.8212	4.69049	0.0142117	0.206004	yes	up	0	0	0	0.0137025	0.0396394	0.0274656	0	0.0269358	STRN-201	striatin-3 isoform X1 [Sus scrofa]	XP_020955544.1
Chr07_85433213_85452842	Pig.08415	128.914	7.01026	1.25268e-07	5.45274e-05	yes	up	0	0	0	0.10962	0.125525	0.17166	0	0.135602	STRN-201	striatin-3 isoform X1 [Sus scrofa]	XP_020955544.1
Chr07_85434688_85452842	Pig.08415	82.193	6.36094	0.00251604	0.0779692	yes	up	0	0	0	0.0411075	0.145345	0.0686641	0	0.0850387	STRN-201	striatin-3 isoform X1 [Sus scrofa]	XP_020955544.1
Chr07_85440544_85452842	Pig.08415	31.1795	4.96252	0.0476615	1	yes	up	0	0	0	0	0.0396394	0.0617977	0	0.0338124	STRN-201	striatin-3 isoform X1 [Sus scrofa]	XP_020955544.1
Chr07_85446229_85452842	Pig.08415	2.58281	1.36894	0.0458897	0.334884	yes	up	0.0516197	0.0382381	0.0537453	0.0685124	0.118918	0.199126	0.0478677	0.128852	STRN-201	striatin-3 isoform X1 [Sus scrofa]	XP_020955544.1
Chr07_86387061_86390948		17.0225	4.08937	0.0415354	1	yes	up	0	0	0	0	0.0330328	0.0205992	0	0.0178774	#N/A	#N/A	#N/A
Chr07_86387061_86413156		10.501	3.39246	0.000155205	0.0143306	yes	up	0.0458842	0.0109252	0.0107491	0.171281	0.310509	0.260924	0.0225195	0.247571	#N/A	#N/A	#N/A
Chr07_88769017_88792416	Pig.08431	0.0950748	-3.39479	0.0370593	0.31362	yes	down	0.0229421	0	0.0161236	0	0	0	0.0130219	0	SNX6-202	sorting nexin-6 [Sus scrofa]	NP_001231145.1
Chr07_95086666_95087001	MSTRG.20849,Pig.17563	2.22827	1.15592	0.0286112	0.283115	yes	up	0.0630907	0.0382381	0.0376217	0.123322	0.0726723	0.123595	0.0463168	0.10653	#N/A	#N/A	#N/A
Chr07_95723263_95758101		0.0466827	-4.42097	0.0217242	0.255573	yes	down	0.0172066	0.0163878	0.0483708	0	0	0	0.0273217	0	#N/A	#N/A	#N/A
Chr07_97375124_97392874	Pig.08771	0.0564385	-4.14718	0.00310588	0.084604	yes	down	0.011471	0.0218503	0.0322472	0	0	0	0.0218562	0	ETFA-201	electron transfer flavoprotein subunit alpha, mitochondrial [Sus scrofa]	NP_001231332.1
Chr08_117809709_117824540	Pig.00649	0.152263	-2.71536	0.029518	0.28746	yes	down	0.0688263	0.0764762	0.0752434	0.0137025	0.0198197	0	0.0735153	0.0111741	NPNT-201	nephronectin isoform X1 [Sus scrofa]	XP_020957362.1
Chr08_118273370_118291983	Pig.00645	0.0727805	-3.7803	0.00583409	0.119382	yes	down	0.011471	0.0273129	0.0107491	0	0	0	0.016511	0	PPA2-206	inorganic pyrophosphatase 2, mitochondrial isoform X1 [Sus scrofa]	XP_020957372.1
Chr08_120381689_120383512	Pig.00634	0.0628791	-3.99128	0.0443129	1	yes	down	0.0458842	0	0.0107491	0	0	0	0.0188777	0	NFKB1-201	nuclear factor of kappa light polypeptide enhancer in B-cells 1 [Sus scrofa]	ABU63584.1
Chr08_132724217_132726270	Pig.00584	0.0373825	-4.74149	0.00876235	0.153956	yes	down	0	0.0382381	0.0644943	0	0	0	0.0342442	0	HERC6-201	probable E3 ubiquitin-protein ligase HERC6 isoform X2 [Sus scrofa]	XP_020956419.1
Chr08_137474574_137487088	Pig.00545	0.160141	-2.64258	0.025273	0.266025	yes	down	0.0516197	0.0163878	0.0591198	0	0.0198197	0	0.0423758	0.00660657	LIN54-201	protein lin-54 homolog isoform X1 [Sus scrofa]	XP_020957519.1
Chr08_137907029_137913935	Pig.00539	0.060062	-4.0574	0.00452172	0.101306	yes	down	0.0286776	0.0109252	0.0214981	0	0	0	0.020367	0	ENOPH1-202	enolase-phosphatase E1 [Sus scrofa]	NP_001230759.1
Chr08_139877592_139902897	Pig.00525	0.0305005	-5.03502	0.000114498	0.0119717	yes	down	0.0573552	0.0437007	0.0161236	0	0	0	0.0390598	0	ANTXR2-205	anthrax toxin receptor 2 [Sus scrofa]	XP_003129419.3
Chr08_139877592_139928228	Pig.00525	0.0677761	-3.88308	0.0487471	1	yes	down	0.0229421	0.0273129	0	0	0	0	0.0167517	0	ANTXR2-205	anthrax toxin receptor 2 [Sus scrofa]	XP_003129419.3
Chr08_1819603_1844417		0.0762826	-3.7125	0.0451144	0.332537	yes	down	0.0286776	0.0163878	0	0	0	0	0.0150218	0	#N/A	#N/A	#N/A
Chr08_20846343_20878523	Pig.16697	2.27534	1.18608	0.0169803	0.219233	yes	up	0.0344131	0.0437007	0.0322472	0.0959174	0.0726723	0.0892633	0.036787	0.085951	DCUN1D4-201	PREDICTED: DCN1-like protein 4 isoform X3 [Ceratotherium simum simum]	XP_004419114.1
Chr08_27230303_27261524	Pig.12465	0.246313	-2.02144	0.034054	0.300761	yes	down	0.693998	0.382381	0.548202	0.0822149	0.132131	0.205992	0.541527	0.140113	LIMCH1-207	LOW QUALITY PROTEIN: LIM and calponin homology domains-containing protein 1 [Sus scrofa]	XP_020956816.1
Chr08_27957202_27994675	Pig.12463	0.213049	-2.23074	0.000204703	0.0178209	yes	down	0.137653	0.114714	0.0859925	0.0342562	0.0264263	0.0137328	0.112786	0.0248051	APBB2-201	amyloid beta A4 precursor protein-binding family B member 2 isoform X9 [Sus scrofa]	XP_020956809.1
Chr08_28917574_28926864	Pig.07260	17.2758	4.11068	0.00873172	0.153956	yes	up	0	0	0	0.027405	0	0.0274656	0	0.0182902	PDS5A-201	PREDICTED: sister chromatid cohesion protein PDS5 homolog A isoform X2 [Equus asinus]	XP_014712699.1
Chr08_29001905_29035485	Pig.07259	31.5842	4.98113	0.0255426	1	yes	up	0	0	0	0	0.0528526	0.0480649	0	0.0336391	UBE2K-201	PREDICTED: ubiquitin-conjugating enzyme E2 K [Fulmarus glacialis]	XP_010208319.1
Chr08_30405578_30452678	Pig.07244	0.0727464	-3.78098	0.0344113	0.302165	yes	down	0.0229421	0.0109252	0.0161236	0	0	0	0.0166636	0	TBC1D1-204	TBC1 domain family member 1 isoform X1 [Sus scrofa]	XP_020956759.1
Chr08_71418686_71512101		6.73889	2.75251	0.00141404	0.0525435	yes	up	0	0.0327755	0.0214981	0.116471	0.171771	0.0823969	0.0180912	0.123546	#N/A	#N/A	#N/A
Chr08_71559017_71589737	Pig.08332	0.125792	-2.99089	0.0161772	0.215249	yes	down	0.0458842	0.0437007	0.0752434	0.0205537	0	0	0.0549428	0.00685124	MTHFD2-201	PREDICTED: probable bifunctional methylenetetrahydrofolate dehydrogenase/cyclohydrolase 2 [Bos mutus]	XP_005891322.1
Chr08_82362096_82402170	Pig.01089	7.62678	2.93107	0.0300507	0.28746	yes	up	0.0229421	0.0109252	0	0.0890662	0.092492	0.0961297	0.0112891	0.0925626	ARHGAP10-201	rho GTPase-activating protein 10 isoform X1 [Sus scrofa]	XP_020956318.1
Chr08_84357230_84363091		15.2335	3.92918	0.0261076	1	yes	up	0	0	0	0.027405	0	0.0205992	0	0.0160014	#N/A	#N/A	#N/A
Chr08_84469002_84469579		0.494239	-1.01672	0.0225991	0.260617	yes	down	0.120446	0.185728	0.16661	0.116471	0.0792788	0.0411985	0.157595	0.0789828	#N/A	#N/A	#N/A
Chr08_98411085_98446659	Pig.01030	18.521	4.21109	0.0363423	0.311929	yes	up	0	0	0	0	0.0132131	0.0480649	0	0.020426	LARP1B-201	la-related protein 1B isoform X1 [Sus scrofa]	XP_013834346.2
Chr08_98428798_98446659	Pig.01030	33.8452	5.08088	0.000401964	0.0258799	yes	up	0	0	0	0.0205537	0.0198197	0.0686641	0	0.0363458	LARP1B-201	la-related protein 1B isoform X1 [Sus scrofa]	XP_013834346.2
Chr09_102579981_102597042	Pig.08199	0.228886	-2.1273	0.0392682	0.3157	yes	down	0.0458842	0.0437007	0.0537453	0	0.0198197	0.0137328	0.0477767	0.0111842	ATM-201	serine-protein kinase ATM [Sus scrofa]	XP_020957581.1
Chr09_109172000_109193076	Pig.11684	2.07846	1.05551	0.0104326	0.170904	yes	up	0.154859	0.131102	0.0698689	0.315157	0.178377	0.281523	0.11861	0.258352	PICALM-207	phosphatidylinositol-binding clathrin assembly protein isoform X6 [Sus scrofa]	XP_020957732.1
Chr09_109177641_109208969	Pig.11684	14.6217	3.87004	0.0220386	1	yes	up	0	0	0	0	0.0132131	0.034332	0	0.0158484	PICALM-207	phosphatidylinositol-binding clathrin assembly protein isoform X6 [Sus scrofa]	XP_020957732.1
Chr09_110087896_110112039	Pig.11675	0.0355618	-4.81353	0.000641526	0.0341197	yes	down	0.0286776	0.0273129	0.0483708	0	0	0	0.0347871	0	TMEM135-201	transmembrane protein 135 isoform X1 [Sus scrofa]	XP_020918270.1
Chr09_117475548_117490571	Pig.08149	0.063211	-3.98368	0.0482692	0.344441	yes	down	0.0344131	0.0109252	0.0107491	0	0	0	0.0186958	0	MTMR2-201	myotubularin-related protein 2 isoform X1 [Sus scrofa]	XP_003129845.1
Chr09_125072334_125077449	Pig.12884	0.268344	-1.89784	0.0273718	0.274348	yes	down	0.0401487	0.0218503	0.0376217	0.0137025	0.0132131	0	0.0332069	0.00897188	FCHSD2-201	F-BAR and double SH3 domains protein 2 isoform X7 [Sus scrofa]	XP_020957951.1
Chr09_133416931_133422582	Pig.10251	0.0925294	-3.43394	0.00821237	0.147195	yes	down	0.0286776	0.0491633	0.0644943	0	0	0.0137328	0.0474451	0.00457761	EMSY-205	BRCA2-interacting transcriptional repressor EMSY isoform X1 [Sus scrofa]	XP_013834604.1
Chr09_134961058_134964794	Pig.10235	48.9463	5.61313	0.00161982	0.0580657	yes	up	0	0	0	0.0205537	0.0660657	0.0686641	0	0.0517612	RSF1-201	remodeling and spacing factor 1 [Sus scrofa]	ACJ53937.1
Chr09_140208927_140230748		22.0255	4.4611	0.00171379	0.0593399	yes	up	0.011471	0	0	0.0890662	0.0792788	0.0892633	0.00382368	0.0858694	#N/A	#N/A	#N/A
Chr09_16522266_16542844	Pig.04694	132.317	7.04786	2.07617e-05	0.00332952	yes	up	0	0	0	0.0479587	0.138738	0.240324	0	0.14234	CEP350	LOW QUALITY PROTEIN: centrosome-associated protein 350 [Sus scrofa]	XP_020919409.1
Chr09_16530586_16542844	Pig.04694	2.15369	1.10681	0.02426	0.264405	yes	up	0.11471	0.0983266	0.134363	0.27405	0.171771	0.322721	0.1158	0.256181	CEP350	LOW QUALITY PROTEIN: centrosome-associated protein 350 [Sus scrofa]	XP_020919409.1
Chr09_16536395_16537017	Pig.04694	2.38649	1.25489	0.0230688	0.261303	yes	up	0.0688263	0.0819388	0.0322472	0.123322	0.0858854	0.260924	0.0610041	0.15671	CEP350	LOW QUALITY PROTEIN: centrosome-associated protein 350 [Sus scrofa]	XP_020919409.1
Chr09_16536395_16542844	Pig.04694	2.01097	1.00789	0.00879174	0.153956	yes	up	0.275305	0.278592	0.290225	0.459033	0.561558	0.741572	0.281374	0.587388	CEP350	LOW QUALITY PROTEIN: centrosome-associated protein 350 [Sus scrofa]	XP_020919409.1
Chr09_17271933_17273563	Pig.04684	15.3006	3.93552	0.0344923	1	yes	up	0	0	0	0.0205537	0.0132131	0.0137328	0	0.0158332	ABL2-205	Abelson tyrosine-protein kinase 2 isoform X5 [Sus scrofa]	XP_003482779.2
Chr09_20192890_20206602	Pig.04669	0.0719365	-3.79713	0.015017	0.21086	yes	down	0.011471	0.0273129	0.0107491	0	0	0	0.016511	0	COP1-203	E3 ubiquitin-protein ligase RFWD2 isoform X1 [Sus scrofa]	XP_020919333.1
Chr09_23271876_23286452	Pig.04645	2.71003	1.43831	0.0151706	0.21204	yes	up	0.0229421	0.0600885	0.0161236	0.0959174	0.0396394	0.151061	0.0330514	0.0955393	SUCO-201	LOW QUALITY PROTEIN: SUN domain-containing ossification factor [Sus scrofa]	XP_003357586.3
Chr09_24085042_24089528	Pig.04641	29.3883	4.87717	0.0348461	1	yes	up	0	0	0	0	0.046246	0.0480649	0	0.0314369	VAMP4-202	PREDICTED: vesicle-associated membrane protein 4 isoform X2 [Fukomys damarensis]	NP_001231636.1
Chr09_31436476_31458415	Pig.00284,MSTRG.24139,MSTRG.24142	19.3836	4.27677	0.0246807	0.264427	yes	up	0	0	0	0	0.046246	0.0137328	0	0.0199929	#N/A	#N/A	#N/A
Chr09_33496203_33504556	Pig.00298	5.02156	2.32814	0.0295109	0.28746	yes	up	0.0229421	0	0	0.0137025	0.0198197	0.0892633	0.00764736	0.0409285	KMT2E-201	histone-lysine N-methyltransferase 2E isoform X1 [Sus scrofa]	XP_013835277.2
Chr09_46064112_46077788		3.58055	1.84018	0.0435347	0.328342	yes	up	0.0172066	0	0.0107491	0.0137025	0.046246	0.0411985	0.00931854	0.0337156	#N/A	#N/A	#N/A
Chr09_46149144_46149865	Pig.00347	18.8818	4.23893	0.00265307	0.0779692	yes	up	0	0.0109252	0	0.0479587	0.0528526	0.123595	0.00364172	0.0748022	TRA2A-201	PREDICTED: transformer-2 protein homolog alpha isoform X3 [Hipposideros armiger]	NP_932770.2
Chr09_46149144_46155136	Pig.00347	31.6205	4.98279	0.040309	1	yes	up	0	0	0	0.0137025	0.0330328	0.0549313	0	0.0338889	TRA2A-201	PREDICTED: transformer-2 protein homolog alpha isoform X3 [Hipposideros armiger]	NP_932770.2
Chr09_60430146_60496454	Pig.00397	0.0389905	-4.68074	0.00321346	0.0866498	yes	down	0.011471	0.0491633	0.0322472	0	0	0	0.0309605	0	GLCCI1-202	glucocorticoid-induced transcript 1 protein isoform X1 [Sus scrofa]	XP_020958076.1
Chr09_65546134_65572294	Pig.00428	0.0765033	-3.70833	0.0342879	1	yes	down	0.011471	0.0109252	0.0268726	0	0	0	0.016423	0	VPS50-201	syndetin isoform X1 [Sus scrofa]	XP_020958043.1
Chr09_66539763_66565923	MSTRG.24574,Pig.00439	11.3602	3.50592	0.00720666	0.139465	yes	up	0	0.0163878	0	0.027405	0.0792788	0.0961297	0.00546259	0.0676045	#N/A	#N/A	#N/A
Chr09_66558827_66565923	MSTRG.24574,Pig.00439	2.23316	1.15909	0.0375404	0.315412	yes	up	0.0745618	0.0764762	0.0591198	0.150727	0.151951	0.185393	0.0700526	0.162691	#N/A	#N/A	#N/A
Chr09_8107518_8117610	Pig.14368	0.27802	-1.84674	0.00217231	0.0708636	yes	down	0.0688263	0.092864	0.0752434	0.0411075	0	0.0274656	0.0789779	0.0228577	LPGAT1-201	acyl-CoA:lysophosphatidylglycerol acyltransferase 1 [Sus scrofa]	XP_003357646.2
Chr09_9089267_9089937	Pig.14355	0.0224498	-5.47715	0.00330609	0.087597	yes	down	0.0573552	0.0546259	0.0483708	0	0	0	0.0534506	0	VASH2-201	vasohibin-2 isoform X1 [Sus scrofa]	EAW93371.1
Chr09_90951665_90967965		0.0448792	-4.47781	0.000877941	0.0397302	yes	down	0.0172066	0.0273129	0.0376217	0	0	0	0.0273804	0	#N/A	#N/A	#N/A
Chr10_14474_14833		3.01768	1.59344	0.0384053	0.315412	yes	up	0.0516197	0.0163878	0.0698689	0.16443	0.0990985	0.151061	0.0459588	0.138196	#N/A	#N/A	#N/A
Chr10_15720421_15721558	Pig.10840	37.762	5.23886	0.0256236	1	yes	up	0	0	0	0	0.0594591	0.0617977	0	0.0404189	RGS7-201	regulator of G-protein signaling 7 isoform X1 [Sus scrofa]	XP_020920030.1
Chr10_16363_16990		4.65931	2.22012	0.0169706	0.219233	yes	up	0.0286776	0.0437007	0.0107491	0.123322	0.0726723	0.226592	0.0277091	0.140862	#N/A	#N/A	#N/A
Chr10_1913538_1919786	Pig.17959	6.97474e-08	-23.7733	5.51608e-13	1.68075e-09	yes	down	1.02666	1.03789	1.48337	0	0	0	1.18264	0	SCCPDH-201	uncharacterized protein LOC100521600 isoform X2 [Sus scrofa]	XP_020937812.1
Chr10_35015260_35023909	Pig.14086	24.2198	4.59812	0.0335274	1	yes	up	0	0	0	0.027405	0.0330328	0.0137328	0	0.0247235	WDR37-201	WD repeat-containing protein 37 isoform X1 [Sus scrofa]	XP_020919692.1
Chr10_46687555_46712915	Pig.09685	0.113141	-3.1438	0.0467969	0.3395	yes	down	0	0.0163878	0.0161236	0	0	0	0.0108371	0	PARD3-201	LOW QUALITY PROTEIN: partitioning defective 3 homolog [Sus scrofa]	XP_020919890.1
Chr10_47499969_47503372	Pig.09684	0.0462423	-4.43464	0.0215531	0.25466	yes	down	0	0.0382381	0.0429962	0	0	0	0.0270781	0	NRP1-201	neuropilin-1 isoform X2 [Sus scrofa]	XP_003130846.1
Chr10_50718086_50766309	Pig.09670	0.038204	-4.71013	0.0457779	1	yes	down	0.0286776	0.0382381	0.0268726	0	0	0	0.0312628	0	MLLT10-201	protein AF-10 isoform X3 [Sus scrofa]	XP_020920583.1
Chr10_53362294_53363531	Pig.16905	0.0960957	-3.37938	0.0316063	0.289202	yes	down	0	0.0218503	0.0161236	0	0	0	0.012658	0	ARHGAP21-201	LOW QUALITY PROTEIN: rho GTPase-activating protein 21 [Sus scrofa]	XP_020920575.1
Chr10_56001317_56001808		0.0747784	-3.74124	0.0260393	0.268046	yes	down	0.011471	0.0163878	0.0214981	0	0	0	0.0164523	0	#N/A	#N/A	#N/A
Chr10_58190961_58205038	Pig.13795	2.15447	1.10734	0.000407691	0.0258799	yes	up	0.246627	0.311367	0.419213	0.726232	0.627624	0.782771	0.325736	0.712209	MINDY3-201	ubiquitin carboxyl-terminal hydrolase MINDY-3 isoform X1 [Sus scrofa]	XP_003130783.1
Chr10_71924540_71931190	Pig.05072	0.124687	-3.00362	0.0125291	0.19184	yes	down	0.0286776	0.0218503	0.0591198	0.0137025	0	0	0.0365493	0.0045675	UBAP1-202	ubiquitin-associated protein 1 isoform X3 [Sus scrofa]	XP_020919707.1
Chr10_73269710_73279129	Pig.05093	28.7469	4.84534	0.0445317	1	yes	up	0	0	0	0.0342562	0.0396394	0.0137328	0	0.0292095	GKAP1-201	G kinase-anchoring protein 1 isoform X1 [Sus scrofa]	XP_005668085.1
Chr10_79750648_79751650	Pig.09964,MSTRG.27211	8.43048	3.07561	9.08379e-08	4.61305e-05	yes	up	0.011471	0.0163878	0.0483708	0.184984	0.204804	0.260924	0.0254099	0.216904	#N/A	#N/A	#N/A
Chr10_9240852_9252634	Pig.12152	0.098021	-3.35077	0.0298012	0.28746	yes	down	0	0.0163878	0.0214981	0	0	0	0.0126286	0	ZBTB41-201	zinc finger and BTB domain-containing protein 41 [Sus scrofa]	XP_020920139.1
Chr11_1141966_1143058	Pig.20214	0.0280548	-5.15561	0.00254512	0.0779692	yes	down	0.0401487	0.0546259	0.0322472	0	0	0	0.0423406	0	Col4a1	collagen alpha-1(IV) chain [Castor canadensis]	XP_020921569.1
Chr11_12201402_12222536	Pig.03511	2.4974	1.32042	0.0108013	0.175538	yes	up	0.0344131	0.0382381	0.0376217	0.0822149	0.0594591	0.144195	0.0367576	0.0952895	PAN3-201	PAB-dependent poly(A)-specific ribonuclease subunit PAN3 isoform X1 [Sus scrofa]	XP_005668351.1
Chr11_12222375_12278556	Pig.03511	0.0818993	-3.61001	0.0100308	0.167934	yes	down	0.0172066	0.0163878	0.0107491	0	0	0	0.0147811	0	PAN3-201	PAB-dependent poly(A)-specific ribonuclease subunit PAN3 isoform X1 [Sus scrofa]	XP_005668351.1
Chr11_1765420_1770431	Pig.18473	0.0602761	-4.05227	0.0366271	1	yes	down	0.011471	0.0273129	0.0214981	0	0	0	0.020094	0	ARHGEF7-201	rho guanine nucleotide exchange factor 7 isoform X9 [Sus scrofa]	XP_020921591.1
Chr11_37429045_37429898	Pig.14533,MSTRG.27900	6.7771	2.76067	0.0442668	0.33082	yes	up	0.0172066	0	0	0.027405	0.046246	0.0480649	0.00573552	0.0405719	#N/A	#N/A	#N/A
Chr11_50455535_50541934	Pig.04491	12.7908	3.67703	0.01868	0.230437	yes	up	0	0	0	0.0137025	0	0.0274656	0	0.0137227	KLF12-202	PREDICTED: Krueppel-like factor 12 [Orycteropus afer afer]	XP_007946493.1
Chr11_52476173_52507914	Pig.04496	0.244397	-2.0327	0.00225493	0.072324	yes	down	0.825915	1.04335	0.816928	0.246645	0.237836	0.192259	0.895399	0.22558	LMO7-201	LIM domain only protein 7 isoform X1 [Sus scrofa]	XP_020921337.1
Chr11_5540224_5541652	Pig.03572,MSTRG.27401	0.0734638	-3.76682	0.0481326	0.344273	yes	down	0	0.0109252	0.0429962	0	0	0	0.0179738	0	#N/A	#N/A	#N/A
Chr11_56028794_56032206	Pig.04511	4.17179	2.06067	2.41122e-08	1.4694e-05	yes	up	0.149124	0.163878	0.338595	0.931769	1.07026	0.672908	0.217199	0.891647	NDFIP2-202	NEDD4 family-interacting protein 2 [Sus scrofa]	XP_001926612.1
Chr11_56028794_56037997	Pig.04511	5.50687	2.46123	5.79665e-07	0.000196249	yes	up	0.0630907	0.0600885	0.134363	0.602909	0.528526	0.254057	0.0858475	0.461831	NDFIP2-202	NEDD4 family-interacting protein 2 [Sus scrofa]	XP_001926612.1
Chr11_56028794_56044515	Pig.04511	19.1378	4.25835	0.00269743	0.0779692	yes	up	0	0	0	0	0.0264263	0.034332	0	0.0202528	NDFIP2-202	NEDD4 family-interacting protein 2 [Sus scrofa]	XP_001926612.1
Chr11_56028794_56048891	Pig.04511	5.66566	2.50224	0.00256389	0.0779692	yes	up	0.0172066	0	0.0161236	0.0685124	0.0528526	0.0686641	0.0111101	0.063343	NDFIP2-202	NEDD4 family-interacting protein 2 [Sus scrofa]	XP_001926612.1
Chr11_70460141_70466981	Pig.16068	16.3117	4.02784	0.015505	0.213878	yes	up	0	0	0.0214981	0.0959174	0.132131	0.0961297	0.00716604	0.10806	ABCC4	multidrug resistance-associated protein 4 isoform X1 [Sus scrofa]	XP_020921445.1
Chr11_73469919_73470694		0.365197	-1.45325	0.00931483	0.160352	yes	down	0.0860328	0.065551	0.145112	0.0411075	0.0396394	0.0274656	0.0988987	0.0360708	#N/A	#N/A	#N/A
Chr11_7619806_7628690	Pig.03545	0.0734553	-3.76699	0.0477251	0.342161	yes	down	0	0.0109252	0.0429962	0	0	0	0.0179738	0	IFT88-201	intraflagellar transport protein 88 homolog [Sus scrofa]	XP_020921093.1
Chr11_76729156_76730764	Pig.07943	0.0439532	-4.50789	0.0230066	0.261303	yes	down	0.011471	0.0437007	0.0268726	0	0	0	0.0273481	0	NALCN	sodium leak channel non-selective protein isoform X1 [Sus scrofa]	XP_020921537.1
Chr11_7762796_7763348	Pig.03542	0.255184	-1.97039	0.00088666	0.0397302	yes	down	0.137653	0.092864	0.214981	0.0342562	0.0132131	0.0686641	0.148499	0.0387112	XPO4-202	exportin-4 isoform X1 [Sus scrofa]	XP_020921096.1
Chr11_8078661_8086592	Pig.03540	0.419784	-1.25228	0.000970807	0.0406927	yes	down	0.195008	0.218503	0.145112	0.10962	0.0264263	0.109863	0.186208	0.0819696	MICU2-202	calcium uptake protein 2, mitochondrial isoform X1 [Sus scrofa]	XP_020921111.1
Chr12_11781912_11845650	MSTRG.28723	71.0853	6.15148	0.00387551	0.0939302	yes	up	0.814444	1.20723	0.580449	69.1702	55.3763	71.857	0.867375	65.4678	0	0	XP_020921875.1
Chr12_11843480_11891592	MSTRG.28723	0.00111291	-9.81145	9.98183e-07	0.000304146	yes	down	55.1069	64.2673	40.7604	0.0479587	0.0594591	0.0823969	53.3782	0.0632716	0	0	XP_020921875.1
Chr12_15327650_15366896	Pig.18677,MSTRG.28969	13.6868	3.77472	0.0427558	0.325746	yes	up	0	0	0	0.0411075	0	0	0	0.0137025	#N/A	#N/A	#N/A
Chr12_15327650_15371282	Pig.18677,MSTRG.28969	2.88837	1.53025	0.0297466	0.28746	yes	up	0	0.0491633	0.0214981	0.0342562	0.0594591	0.123595	0.0235538	0.0724369	#N/A	#N/A	#N/A
Chr12_24088630_24104595	Pig.11798	0.0650149	-3.94309	0.017713	0.226771	yes	down	0.0286776	0.0109252	0.0161236	0	0	0	0.0185755	0	RHOT1-201	PREDICTED: mitochondrial Rho GTPase 1, partial [Manis javanica]	XP_003797228.1
Chr12_24249907_24253371	Pig.11795	0.0356757	-4.80892	0.00962851	0.162989	yes	down	0.0458842	0.0491633	0	0	0	0	0.0316825	0	ZNF207-205	PREDICTED: BUB3-interacting and GLEBS motif-containing protein ZNF207 isoform X3 [Ovis aries]	XP_020923110.1
Chr12_24249907_24256251	Pig.11795	0.0212353	-5.55739	1.41725e-05	0.00254022	yes	down	0.0516197	0.065551	0.0537453	0	0	0	0.056972	0	ZNF207-205	PREDICTED: BUB3-interacting and GLEBS motif-containing protein ZNF207 isoform X3 [Ovis aries]	XP_020923110.1
Chr12_27312206_27323763	MSTRG.29412,Pig.11225	1.53345e+07	23.8703	0.000270779	0.0206266	yes	up	0	0	0	0	2.05464	0	0	0.684881	#N/A	#N/A	#N/A
Chr12_3458862_3478097	Pig.19814	0.055873	-4.16171	0.0093019	1	yes	down	0.011471	0.0273129	0.0268726	0	0	0	0.0218855	0	EIF4A3-201	eukaryotic initiation factor 4A-III [Bos taurus]	NP_001039653.1
Chr12_34756374_34763751	Pig.13398	0.109932	-3.18531	0.0427628	0.325746	yes	down	0.011471	0.0109252	0.0107491	0	0	0	0.0110484	0	PCTP	phosphatidylcholine transfer protein isoform X1 [Sus scrofa]	XP_020922913.1
Chr12_40853263_40853381	MSTRG.29689	0.0416263	-4.58636	0.000339162	0.0240332	yes	down	0.103239	0.131102	0.0806179	0.0137025	0	0	0.104986	0.0045675	0	0	OWK14899.1
Chr12_48595782_48605968	Pig.19046	0.270988	-1.8837	0.0103003	0.169649	yes	down	0.108975	0.152952	0.188109	0.0753637	0.0132131	0.034332	0.150012	0.0409696	EZH1-201	histone-lysine N-methyltransferase EZH1 [Sus scrofa]	NP_001230135.1
Chr12_56004263_56093033		0.0374261	-4.73981	0.010186	0.168679	yes	down	0.0573552	0.0163878	0.0214981	0	0	0	0.031747	0	#N/A	#N/A	#N/A
Chr12_6014140_6037875		0.492445	-1.02196	0.0240364	0.26345	yes	down	0.281041	0.202116	0.128989	0.0822149	0.112312	0.123595	0.204048	0.106041	#N/A	#N/A	#N/A
Chr12_6014140_6048979		0.406797	-1.29762	0.025967	0.268046	yes	down	0.0860328	0.152952	0.145112	0.027405	0.046246	0.0892633	0.128033	0.0543048	#N/A	#N/A	#N/A
Chr12_6060022_6072546	Pig.19289	8.97948	3.16663	0.0288206	0.284195	yes	up	0.011471	0.0163878	0	0.0411075	0.158558	0.0686641	0.00928627	0.0894431	NCOR1	LOW QUALITY PROTEIN: nuclear receptor corepressor 1 [Sus scrofa]	XP_020921950.1
Chr12_6535923_6536562		0.034207	-4.86956	0.00152341	0.0559257	yes	down	0.011471	0.0437007	0.0537453	0	0	0	0.0363057	0	#N/A	#N/A	#N/A
Chr12_6535923_6544653		0.144281	-2.79305	0.00473931	0.103984	yes	down	0.0573552	0.092864	0.0752434	0.0137025	0	0.0205992	0.0751542	0.0114339	#N/A	#N/A	#N/A
Chr12_6535923_6554029		0.0523147	-4.25664	0.0101063	0.168272	yes	down	0	0.0382381	0.0322472	0	0	0	0.0234951	0	#N/A	#N/A	#N/A
Chr12_6535923_6560705		0.0432167	-4.53227	0.00614019	0.123087	yes	down	0.0229421	0.0382381	0.0214981	0	0	0	0.0275594	0	#N/A	#N/A	#N/A
Chr12_6541810_6554029		0.223463	-2.16189	0.0248503	0.264427	yes	down	0.0802973	0.0710136	0.128989	0.0411075	0.0198197	0	0.0934332	0.0203091	#N/A	#N/A	#N/A
Chr13_110968727_110983363	Pig.15072	3.69473	1.88547	0.00445197	0.100483	yes	up	0.0344131	0.0327755	0.0483708	0.116471	0.0990985	0.226592	0.0385198	0.147387	DLG1-202	disks large homolog 1 isoform X1 [Sus scrofa]	XP_020925751.1
Chr13_111304195_111313493	Pig.15067	0.0880559	-3.50544	0.0238343	0.26345	yes	down	0.011471	0	0.0322472	0	0	0	0.0145727	0	PAK2-201	serine/threonine-protein kinase PAK 2 [Sus scrofa]	XP_020925795.1
Chr13_113016848_113038677		2.49821	1.32089	1.71557e-05	0.00290409	yes	up	0.206479	0.300442	0.440711	0.630314	0.852247	0.913232	0.315877	0.798598	#N/A	#N/A	#N/A
Chr13_119129735_119135708	MSTRG.32525,Pig.02129	0.0301574	-5.05134	0.000262383	0.0205171	yes	down	0.0229421	0.0546259	0.0429962	0	0	0	0.0401881	0	#N/A	#N/A	#N/A
Chr13_123966963_123968567	Pig.02114	0.341485	-1.5501	0.0255904	0.266122	yes	down	0.0573552	0.0983266	0.139738	0.027405	0.0396394	0.034332	0.0984732	0.0337921	ZBTB20-201	zinc finger and BTB domain-containing protein 20 isoform X1 [Sus scrofa]	XP_020926914.1
Chr13_126811720_126814276	Pig.02081	0.0891725	-3.48726	0.0334016	0.29846	yes	down	0	0.0109252	0.0322472	0	0	0	0.0143908	0	NECTIN3-201	nectin-3 isoform X2 [Sus scrofa]	XP_020926054.1
Chr13_126811720_126850038	Pig.02081	0.385607	-1.3748	0.0451161	0.332537	yes	down	0.0229421	0.0710136	0.0429962	0.0205537	0.0330328	0	0.0456506	0.0178622	NECTIN3-201	nectin-3 isoform X2 [Sus scrofa]	XP_020926054.1
Chr13_126832355_126850038	Pig.02081	0.208071	-2.26486	2.49502e-06	0.000584795	yes	down	0.263834	0.136565	0.204232	0.0685124	0.0132131	0.0480649	0.201544	0.0432635	NECTIN3-201	nectin-3 isoform X2 [Sus scrofa]	XP_020926054.1
Chr13_12812644_12829260		46.8282	5.54931	0.00698728	0.137356	yes	up	0	0	0	0	0.0264263	0.130462	0	0.052296	#N/A	#N/A	#N/A
Chr13_1453412_1456629	MSTRG.30515	10.5054	3.39306	2.78441e-07	0.000106051	yes	up	0.0516197	0.180265	0.161236	1.13046	1.79699	1.25655	0.13104	1.39466	0	0	NP_001137400.1
Chr13_159424139_159447362	Pig.00974	34.3005	5.10016	0.0351502	1	yes	up	0	0	0	0.0411075	0.0132131	0.0549313	0	0.0364173	0	PREDICTED: serine/arginine repetitive matrix protein 1-like isoform X2 [Chlorocebus sabaeus]	XP_025741291.1
Chr13_1670713_1672319	MSTRG.30523	0.396979	-1.33287	0.0415207	0.325228	yes	down	0.0745618	0.0764762	0.0644943	0.0411075	0.0198197	0.0274656	0.0718441	0.0294643	0	0	XP_004835182.2
Chr13_169124709_169133513		23.7378	4.56912	0.0293547	1	yes	up	0	0	0	0.0205537	0.0264263	0.0274656	0	0.0248152	#N/A	#N/A	#N/A
Chr13_180594582_180621458		20.3684	4.34826	0.0026406	0.0779692	yes	up	0	0	0.0107491	0.0616612	0.0858854	0.0686641	0.00358302	0.0720702	#N/A	#N/A	#N/A
Chr13_181129183_181184025		0.352678	-1.50358	0.0097832	0.164693	yes	down	0.108975	0.109252	0.139738	0.0137025	0.0858854	0.0274656	0.119321	0.0423512	#N/A	#N/A	#N/A
Chr13_181182501_181207763		0.408609	-1.29121	0.0193177	0.233576	yes	down	0.0917683	0.103789	0.150487	0.0685124	0.0330328	0.0411985	0.115348	0.0475812	#N/A	#N/A	#N/A
Chr13_186153726_186175290		0.0324305	-4.9465	0.00346237	0.0901696	yes	down	0.0172066	0.0437007	0.0537453	0	0	0	0.0382175	0	#N/A	#N/A	#N/A
Chr13_186960416_186965103	Pig.15115	0.39572	-1.33745	0.0405096	0.319774	yes	down	0.0917683	0.0600885	0.0483708	0.027405	0.0528526	0	0.0667425	0.0267525	TRAPPC10	trafficking protein particle complex subunit 10 [Sus scrofa]	XP_020926737.1
Chr13_28582593_28610417	Pig.01536	14.6631	3.87412	0.0166468	0.219108	yes	up	0	0	0	0	0.0132131	0.034332	0	0.0158484	FRMD4B-204	FERM domain-containing protein 4B isoform X4 [Sus scrofa]	XP_020924862.1
Chr13_3790648_3799041	Pig.07833	9.30548	3.21808	0.0131584	0.199312	yes	up	0	0.0109252	0.0161236	0.0685124	0.112312	0.0686641	0.00901625	0.0831627	NKTR-201	NK-tumor recognition protein isoform X9 [Sus scrofa]	XP_005669463.1
Chr13_46999542_47004922		0.0637705	-3.97097	0.0121807	0.18891	yes	down	0	0.0218503	0.0376217	0	0	0	0.019824	0	#N/A	#N/A	#N/A
Chr13_53391484_53428936	Pig.06070	5.10845	2.35289	1.13908e-08	8.67693e-06	yes	up	0.154859	0.142027	0.0859925	0.541248	0.832428	0.666042	0.127626	0.679906	CEP63-201	centrosomal protein of 63 kDa isoform X1 [Sus scrofa]	XP_005669913.1
Chr13_55003824_55067505	Pig.06075	0.0628712	-3.99146	0.00525301	0.112656	yes	down	0.0229421	0.0327755	0	0	0	0	0.0185725	0	PCCB-205	propionyl-CoA carboxylase beta chain, mitochondrial precursor [Sus scrofa]	NP_999066.1
Chr13_73662157_73669209		0.0982668	-3.34715	0.0348472	0.305114	yes	down	0	0.0163878	0.0214981	0	0	0	0.0126286	0	#N/A	#N/A	#N/A
Chr13_7626662_7653595	MSTRG.30700,Pig.07899	0.333027	-1.58629	0.0169224	0.219233	yes	down	0.0630907	0.0546259	0.102116	0.027405	0	0.0480649	0.0732776	0.0251566	#N/A	#N/A	#N/A
Chr13_86632258_86638860	Pig.11305	32.3468	5.01555	0.00112022	0.0433706	yes	up	0	0	0	0.0205537	0.046246	0.034332	0	0.0337106	SEC62-201	translocation protein SEC62 [Sus scrofa]	XP_006764151.1
Chr13_86836296_86842481	Pig.11303	3.08709	1.62625	0.000885536	0.0397302	yes	up	0.303983	0.46432	1.26839	1.61689	1.56576	3.01435	0.678897	2.06567	PHC3-201	polyhomeotic-like protein 3 isoform X1 [Sus scrofa]	XP_020925436.1
Chr13_9373192_9382165	Pig.15883	0.100099	-3.3205	0.0320643	0.289424	yes	down	0	0.0109252	0.0268726	0	0	0	0.0125993	0	ARIH2-204	E3 ubiquitin-protein ligase ARIH2 isoform X1 [Sus scrofa]	XP_003132245.3
Chr13_9451851_9452894	Pig.15877	2.81389	1.49256	0.0349529	0.305161	yes	up	0.0344131	0.0491633	0.0268726	0.0616612	0.158558	0.102996	0.0368164	0.107738	QRICH1-203	glutamine-rich protein 1 [Sus scrofa]	XP_005669589.1
Chr13_9659551_9662950	Pig.15869	0.152967	-2.70871	0.0253191	0.266025	yes	down	0.0229421	0.0273129	0.0376217	0.0137025	0	0	0.0292922	0.0045675	USP4-201	ubiquitin carboxyl-terminal hydrolase 4 isoform X1 [Sus scrofa]	XP_005669562.1
Chr13_98873441_98889700	Pig.06482	5.8432	2.54676	0.00112313	0.0433706	yes	up	0.0286776	0.092864	0	0.184984	0.330328	0.260924	0.0405139	0.258745	MCCC1-201	DCN1-like protein 1 isoform 1 [Homo sapiens]	NP_065691.2
Chr13_98885382_98889700	Pig.06482	3.34731	1.743	0.000467903	0.0274173	yes	up	0.0516197	0.103789	0.0644943	0.253496	0.21141	0.302122	0.0733011	0.255676	MCCC1-201	DCN1-like protein 1 isoform 1 [Homo sapiens]	NP_065691.2
Chr13_99527027_99532398		0.312597	-1.67762	0.0156148	0.213878	yes	down	0.0630907	0.136565	0.091367	0.027405	0.0264263	0.0411985	0.0970075	0.0316766	#N/A	#N/A	#N/A
Chr13_99531418_99551463		0.0685663	-3.86636	0.030061	1	yes	down	0	0.0273129	0.0268726	0	0	0	0.0180619	0	#N/A	#N/A	#N/A
Chr13_99755230_99755967	Pig.06491	0.0590742	-4.08133	0.039212	1	yes	down	0.011471	0.0327755	0.0161236	0	0	0	0.0201234	0	Parl	presenilins-associated rhomboid-like protein, mitochondrial isoform X1 [Sus scrofa]	XP_003483328.1
Chr14_104847735_104875171	Pig.01945	9.49388	3.247	0.00391743	0.0939302	yes	up	0	0	0.0214981	0.0342562	0.0726723	0.0961297	0.00716604	0.0676861	SORBS1-203	sorbin and SH3 domain-containing protein 1 isoform X21 [Sus scrofa]	XP_020929807.1
Chr14_112746957_112780847	Pig.16330	21.382	4.41833	0.0175019	0.225014	yes	up	0	0	0	0.0205537	0.0132131	0.034332	0	0.0226996	SH3PXD2A-201	SH3 and PX domain-containing protein 2A isoform X1 [Sus scrofa]	XP_020928421.1
Chr14_11639751_11660315	Pig.05713	0.104078	-3.26426	0.0449211	0.332537	yes	down	0.0172066	0.0163878	0	0	0	0	0.0111981	0	SPECC1L	cytospin-A isoform X1 [Sus scrofa]	XP_020929455.1
Chr14_11660108_11660315	Pig.05713	0.0706426	-3.82332	0.021563	0.25466	yes	down	0.0172066	0	0.0376217	0	0	0	0.0182761	0	SPECC1L	cytospin-A isoform X1 [Sus scrofa]	XP_020929455.1
Chr14_129722138_129804031	MSTRG.35885,Pig.12074	0.129872	-2.94484	0.0389174	0.3157	yes	down	0.011471	0.0163878	0	0	0	0	0.00928627	0	#N/A	#N/A	#N/A
Chr14_129750351_129804031	MSTRG.35885,Pig.12074	0.0413039	-4.59758	0.000356494	0.0245699	yes	down	0.0229421	0.0382381	0.0268726	0	0	0	0.0293509	0	#N/A	#N/A	#N/A
Chr14_129787047_129804031	MSTRG.35885,Pig.12074	0.127706	-2.9691	0.0115684	0.184549	yes	down	0.0172066	0.0437007	0.0429962	0	0.0132131	0	0.0346345	0.00440438	#N/A	#N/A	#N/A
Chr14_139317642_139339398		0.0849565	-3.55713	0.0392736	1	yes	down	0.011471	0.0109252	0.0214981	0	0	0	0.0146314	0	#N/A	#N/A	#N/A
Chr14_20015252_20015712	Pig.10671,MSTRG.33945	0.331345	-1.59359	0.00528709	0.112656	yes	down	0.527668	0.469782	0.79543	0.267199	0.0990985	0.233458	0.597627	0.199918	#N/A	#N/A	#N/A
Chr14_2997882_3000726	Pig.05846	2.14009	1.09767	0.00541381	0.11423	yes	up	0.103239	0.0764762	0.139738	0.267199	0.171771	0.254057	0.106484	0.231009	SPPL3-201	signal peptide peptidase-like 3 isoform X2 [Sus scrofa]	XP_020928363.1
Chr14_39164972_39170296	Pig.07737	2.72266	1.44502	0.028429	0.283082	yes	up	0.0344131	0.0273129	0.0429962	0.0685124	0.112312	0.109863	0.0349074	0.0968956	PPP3CA-201	serine/threonine-protein phosphatase 2B catalytic subunit gamma isoform isoform X1 [Sus scrofa]	XP_003483429.1
Chr14_42930420_42931617	Pig.05610	0.130186	-2.94135	0.0322679	0.289424	yes	down	0.0516197	0.0109252	0.0376217	0	0	0.0137328	0.0333889	0.00457761	DPYSL2-201	dihydropyrimidinase-related protein 2 isoform X1 [Sus scrofa]	XP_001927836.1
Chr14_52640117_52651893	Pig.05548	0.048032	-4.37986	0.00218614	0.0708636	yes	down	0.0229421	0.0491633	0	0	0	0	0.0240351	0	NEK1-201	serine/threonine-protein kinase Nek1 isoform X4 [Sus scrofa]	XP_013838172.1
Chr14_62315698_62320947		0.169533	-2.56036	0.0422504	0.325257	yes	down	0.0688263	0.065551	0.0644943	0.0205537	0.0132131	0	0.0662905	0.0112556	#N/A	#N/A	#N/A
Chr14_65287728_65290729	Pig.07150	0.364392	-1.45644	0.0180989	0.228783	yes	down	0.0802973	0.0546259	0.0644943	0.0411075	0	0.034332	0.0664725	0.0251465	ATXN2-201	ataxin-2 isoform X3 [Sus scrofa]	XP_020928569.1
Chr14_7769451_7769958	Pig.05797	0.431207	-1.21355	0.01482	0.21086	yes	down	0.126181	0.092864	0.134363	0.0479587	0.046246	0.0617977	0.117803	0.0520008	TTC28-201	LOW QUALITY PROTEIN: tetratricopeptide repeat protein 28 [Sus scrofa]	XP_020929710.1
Chr14_83277934_83281237		21.1364	4.40166	0.00546267	0.11423	yes	up	0	0	0	0.0205537	0	0.0480649	0	0.0228729	#N/A	#N/A	#N/A
Chr14_85833418_85836812	Pig.19868	6.15406	2.62154	0.00327773	0.087597	yes	up	0	0.0491633	0	0.0890662	0.158558	0.0755305	0.0163878	0.107718	WAPL-201	wings apart-like protein homolog isoform X1 [Sus scrofa]	XP_013845907.2
Chr14_88277384_88279313	Pig.02045,MSTRG.35219	0.0667337	-3.90544	0.0247913	0.264427	yes	down	0	0.0109252	0.0483708	0	0	0	0.0197653	0	#N/A	#N/A	#N/A
Chr14_90028374_90037704	Pig.02027	2.4241	1.27745	0.00443595	0.100483	yes	up	0.235156	0.196653	0.241854	0.411075	0.535132	0.748439	0.224554	0.564882	UBE2D1-203	NR:NA	NP_003329.1
Chr14_9266160_9274270	Pig.05775	2.62372	1.39161	2.91506e-06	0.000634443	yes	up	0.200743	0.202116	0.247228	0.49329	0.515312	0.748439	0.216696	0.58568	MTMR3-201	myotubularin-related protein 3 isoform X1 [Sus scrofa]	XP_013838486.2
Chr14_97552461_97562490	Pig.02009,MSTRG.35312	10.4759	3.389	0.0197647	0.236372	yes	up	0	0.0109252	0	0.027405	0.0528526	0.0411985	0.00364172	0.0404853	#N/A	#N/A	#N/A
Chr15_103111260_103133434	Pig.00054	4.28083	2.09789	0.0364584	0.312047	yes	up	0.0745618	0.0273129	0.0322472	0.239794	0.158558	0.199126	0.0447073	0.199159	BOLL-201	protein boule-like isoform X1 [Sus scrofa]	XP_020931390.1
Chr15_105579889_105581573	Pig.00043	0.111957	-3.15899	0.0179786	0.228783	yes	down	0.0630907	0.0327755	0.0161236	0	0	0.0137328	0.0373299	0.00457761	SPATS2L-201	SPATS2-like protein isoform X1 [Sus scrofa]	XP_020930234.1
Chr15_107798196_107811074	Pig.00014	0.0498026	-4.32763	0.00166053	0.0581569	yes	down	0.0229421	0	0.0537453	0	0	0	0.0255625	0	FAM117B-201	protein FAM117B isoform X1 [Sus scrofa]	XP_003133638.2
Chr15_107979484_107995904		23.1126	4.53061	0.0025951	0.0779692	yes	up	0	0	0	0	0.0264263	0.0480649	0	0.0248304	#N/A	#N/A	#N/A
Chr15_107979484_108030953		5.12199	2.3567	0.00117823	0.044876	yes	up	0.0229421	0.0491633	0.0107491	0.178132	0.112312	0.157927	0.0276181	0.149457	#N/A	#N/A	#N/A
Chr15_108154178_108154481	Pig.00010	33.0145	5.04503	0.016683	0.219108	yes	up	0	0	0	0.0205537	0	0.0892633	0	0.0366057	CYP20A1-202	neurobeachin-like protein 1 isoform X2 [Sus scrofa]	XP_020930765.1
Chr15_108518521_108523889	Pig.00007	0.185934	-2.42714	0.00066067	0.0341197	yes	down	0.0860328	0.092864	0.0644943	0	0.0198197	0.0274656	0.0811304	0.0157618	RAPH1	LOW QUALITY PROTEIN: ras-associated and pleckstrin homology domains-containing protein 1 [Sus scrofa]	XP_020930982.1
Chr15_111001804_111003134	Pig.11694	25.9314	4.69663	0.0159349	1	yes	up	0	0	0	0.0205537	0.0330328	0.0274656	0	0.0270174	INO80D-201	INO80 complex subunit D isoform X1 [Sus scrofa]	XP_020931699.1
Chr15_114503744_114560459	MSTRG.37316	2.20711	1.14216	0.0138849	0.204458	yes	up	0.355602	0.453395	0.139738	0.712529	0.772969	0.755305	0.316245	0.746934	0	0	XP_005672211.2
Chr15_114533496_114560459	MSTRG.37316	2.90227	1.53718	5.9455e-05	0.00670961	yes	up	0.579288	0.693748	0.521329	1.9526	1.69128	1.7578	0.598122	1.80056	0	0	XP_005672211.2
Chr15_121744453_121761784	Pig.14206	0.155258	-2.68726	3.13033e-05	0.00469631	yes	down	0.16633	0.355068	0.300974	0.0753637	0.0330328	0.0205992	0.274124	0.0429986	TNS1-207	PREDICTED: tensin-1 isoform X1 [Orcinus orca]	XP_020735031.1
Chr15_127953278_127972921	Pig.14102	0.103929	-3.26633	0.0470007	0.340169	yes	down	0.0172066	0.0163878	0	0	0	0	0.0111981	0	CUL3-201	PREDICTED: cullin-3 isoform X1 [Rousettus aegyptiacus]	NP_001179735.1
Chr15_135695908_135700357	Pig.08751	0.0631791	-3.98441	0.0487499	0.345444	yes	down	0	0.0273129	0.0322472	0	0	0	0.0198534	0	USP40-201	ubiquitin carboxyl-terminal hydrolase 40 isoform X1 [Sus scrofa]	XP_020931862.1
Chr15_139705972_139714817	Pig.16069	0.0904821	-3.46622	0.00401462	0.0948259	yes	down	0.0688263	0.0273129	0.0483708	0	0	0.0137328	0.04817	0.00457761	TRAF3IP1-201	TRAF3-interacting protein 1 [Sus scrofa]	XP_020930617.1
Chr15_16932689_16939205	Pig.04263	32.0688	5.0031	0.0155584	1	yes	up	0	0	0	0.027405	0.0264263	0.0480649	0	0.0339654	RAB3GAP1-201	LOW QUALITY PROTEIN: rab3 GTPase-activating protein catalytic subunit [Sus scrofa]	XP_013839399.2
Chr15_34149541_34149941	Pig.08922	0.0543527	-4.2015	0.0296072	1	yes	down	0	0.0273129	0.0429962	0	0	0	0.0234364	0	ARHGEF10L-201	LOW QUALITY PROTEIN: rho guanine nucleotide exchange factor 10 [Sus scrofa]	XP_020932155.1
Chr15_3734521_3737333	Pig.04234	0.0694107	-3.8487	0.0459408	0.334884	yes	down	0.0229421	0	0.0322472	0	0	0	0.0183964	0	MBD5-201	methyl-CpG-binding domain protein 5 isoform X1 [Sus scrofa]	XP_020931757.1
Chr15_4166257_4202776		38.0555	5.25003	0.0276346	1	yes	up	0	0	0	0.027405	0.0264263	0.0686641	0	0.0408318	#N/A	#N/A	#N/A
Chr15_46857316_46859616	MSTRG.36392,Pig.02709	0.0741745	-3.75293	0.0239673	0.26345	yes	down	0.0286776	0	0.0214981	0	0	0	0.0167252	0	#N/A	#N/A	#N/A
Chr15_46857316_46862067	MSTRG.36392,Pig.02709	0.100587	-3.31349	0.0321097	0.289424	yes	down	0.0516197	0.0437007	0.0376217	0.0137025	0	0	0.044314	0.0045675	#N/A	#N/A	#N/A
Chr15_47378167_47389221	MSTRG.36404	0.0508501	-4.29761	0.0403248	1	yes	down	0.0172066	0.0491633	0	0	0	0	0.0221233	0	0	0	NP_001230495.2
Chr15_49079022_49080493	Pig.02682,MSTRG.36454	0.216077	-2.21038	0.00735048	0.139973	yes	down	0.0917683	0.092864	0.193483	0.0342562	0.0132131	0.034332	0.126038	0.0272671	#N/A	#N/A	#N/A
Chr15_57751128_57770746	Pig.02634	0.232422	-2.10518	0.011863	0.186427	yes	down	0.315454	0.185728	0.247228	0.0822149	0.0594591	0.034332	0.24947	0.0586687	HERC2-201	E3 ubiquitin-protein ligase HERC2 isoform X1 [Sus scrofa]	XP_020931002.1
Chr15_67621405_67628331	Pig.00244	2.45771	1.29732	0.0111525	0.179677	yes	up	0.0458842	0.0437007	0.0376217	0.0479587	0.125525	0.151061	0.0424022	0.108182	BAZ2B-201	PREDICTED: bromodomain adjacent to zinc finger domain protein 2B isoform X4 [Ceratotherium simum simum]	XP_020930417.1
Chr15_77516142_77527045	Pig.00190	2.45618	1.29642	0.00668815	0.132599	yes	up	0.0688263	0.0491633	0.0698689	0.150727	0.105705	0.219725	0.0626195	0.158719	UBR3-203	LOW QUALITY PROTEIN: E3 ubiquitin-protein ligase UBR3 [Sus scrofa]	XP_020932162.1
Chr15_77526292_77541510	Pig.00190	3.42824	1.77747	0.0161324	0.215249	yes	up	0.0516197	0.0273129	0.0322472	0.0890662	0.112312	0.199126	0.0370599	0.133501	UBR3-203	LOW QUALITY PROTEIN: E3 ubiquitin-protein ligase UBR3 [Sus scrofa]	XP_020932162.1
Chr15_78573219_78637426	Pig.00183	3.99579	1.99848	0.0389155	0.3157	yes	up	0	0.0109252	0.0107491	0.05481	0.0132131	0.0205992	0.00722474	0.0295408	TLK1-201	serine/threonine-protein kinase tousled-like 1 isoform X1 [Sus scrofa]	XP_001927925.1
Chr15_78580145_78637426	Pig.00183	0.0253825	-5.30002	0.000338886	0.0240332	yes	down	0.0802973	0.0546259	0	0	0	0	0.0449744	0	TLK1-201	serine/threonine-protein kinase tousled-like 1 isoform X1 [Sus scrofa]	XP_001927925.1
Chr15_79969948_79977134	Pig.00171	0.0840612	-3.57242	0.01389	0.204458	yes	down	0.0229421	0	0.0214981	0	0	0	0.0148134	0	PDK1-202	pyruvate dehydrogenase (acetyl-transferring) kinase isozyme 1, mitochondrial [Sus scrofa]	NP_001153080.1
Chr15_83145588_83164711		18.8464	4.23622	0.0461791	1	yes	up	0	0	0	0	0.0264263	0.034332	0	0.0202528	#N/A	#N/A	#N/A
Chr15_85752835_85764319	Pig.00129,MSTRG.36928	5.34341	2.41776	0.000230647	0.0189941	yes	up	0.481784	0.884939	0.553576	2.58292	3.22401	5.10174	0.6401	3.63622	#N/A	#N/A	#N/A
Chr15_85752835_85764659	Pig.00129,MSTRG.36928	2.82022	1.49581	0.0226828	0.260617	yes	up	0.120446	0.120177	0.161236	0.404223	0.469066	0.260924	0.133953	0.378071	#N/A	#N/A	#N/A
Chr15_85761905_85764319	Pig.00129,MSTRG.36928	14.0546	3.81297	0.00811383	0.146289	yes	up	0.011471	0.0273129	0.0107491	0.0753637	0.198197	0.494381	0.016511	0.255981	#N/A	#N/A	#N/A
Chr15_96711870_96728010	Pig.00081	0.0821701	-3.60524	0.0451822	0.332537	yes	down	0.0286776	0	0.0161236	0	0	0	0.0149337	0	NAB1	NGFI-A-binding protein 1 isoform X1 [Sus scrofa]	XP_020931714.1
Chr16_29597804_29638933	Pig.04517,MSTRG.38206	0.0399132	-4.64699	0.000516615	0.0291505	yes	down	0.0286776	0.0163878	0.0483708	0	0	0	0.0311454	0	#N/A	#N/A	#N/A
Chr16_33788658_33796723	Pig.01133	0.096005	-3.38075	0.0265817	0.271648	yes	down	0	0.0218503	0.0161236	0	0	0	0.012658	0	PIK3R1-201	phosphatidylinositol 3-kinase regulatory subunit alpha isoform X1 [Sus scrofa]	XP_020932506.1
Chr16_35775308_35787304	Pig.01140	9.43789	3.23846	0.0138435	0.204458	yes	up	0.0172066	0	0	0.10962	0.0264263	0.0274656	0.00573552	0.0545039	ERBIN-201	erbin isoform X1 [Sus scrofa]	XP_020932447.1
Chr16_35783210_35787304	Pig.01140	5.23354	2.38779	0.0344046	0.302165	yes	up	0.011471	0.0163878	0	0.0342562	0.0660657	0.0549313	0.00928627	0.0517511	ERBIN-201	erbin isoform X1 [Sus scrofa]	XP_020932447.1
Chr16_35794581_35816115	Pig.01140	3.80005	1.92602	0.00302269	0.0837286	yes	up	0.0229421	0.0273129	0.0268726	0.123322	0.0858854	0.0892633	0.0257092	0.0994904	ERBIN-201	erbin isoform X1 [Sus scrofa]	XP_020932447.1
Chr16_40041687_40063130	Pig.01158	0.178619	-2.48505	0.0180824	0.228783	yes	down	0.0286776	0.0491633	0.0322472	0	0.0198197	0	0.036696	0.00660657	ZSWIM5-201	zinc finger SWIM domain-containing protein 6 [Sus scrofa]	XP_020932632.1
Chr16_43972316_43979789	Pig.01172	2.04256	1.03038	0.0268472	0.272678	yes	up	0.223685	0.262204	0.182734	0.554951	0.409607	0.453183	0.222874	0.47258	GPBP1-202	vasculin isoform X1 [Sus scrofa]	XP_005672522.1
Chr16_45446435_45470707	Pig.01182	0.255117	-1.97077	0.0442975	0.33082	yes	down	0.0344131	0.0327755	0.0376217	0.0137025	0.0132131	0	0.0349368	0.00897188	SLC38A9-201	sodium-coupled neutral amino acid transporter 9 isoform X1 [Sus scrofa]	XP_003134026.2
Chr16_53671468_53741947	Pig.01244,MSTRG.38604	0.0637735	-3.9709	0.0122286	0.18891	yes	down	0	0.0218503	0.0376217	0	0	0	0.019824	0	#N/A	#N/A	#N/A
Chr16_56704855_56725231	Pig.01262	0.0761957	-3.71415	0.0497739	1	yes	down	0.0229421	0	0.0268726	0	0	0	0.0166049	0	EGFLAM-201	PREDICTED: pikachurin isoform X2 [Vicugna pacos]	XP_006207734.1
Chr16_7674073_7680254	Pig.12551	0.300375	-1.73517	0.0436617	0.328487	yes	down	0.0516197	0.0437007	0.0376217	0.027405	0.0132131	0	0.044314	0.0135394	MARCH6-201	PREDICTED: E3 ubiquitin-protein ligase MARCH6 isoform X5 [Homo sapiens]	XP_026362479.1
Chr17_11110432_11111690	Pig.13473	0.0444844	-4.49056	0.00670175	0.132599	yes	down	0.0172066	0.0109252	0.0591198	0	0	0	0.0290839	0	HOOK3-201	protein Hook homolog 3 isoform X2 [Sus scrofa]	XP_020933506.1
Chr17_26654627_26669224	Pig.09535	0.0714813	-3.80629	0.0249128	1	yes	down	0.0172066	0.0218503	0.0107491	0	0	0	0.016602	0	XRN2-201	LOW QUALITY PROTEIN: 5'-3' exoribonuclease 2 [Sus scrofa]	XP_004754180.1
Chr17_33805811_33808502	Pig.11912	14.7735	3.88494	0.0184524	0.229488	yes	up	0	0	0	0	0.0198197	0.0274656	0	0.0157618	ASXL1-201	putative Polycomb group protein ASXL1 isoform X1 [Sus scrofa]	XP_020933085.1
Chr17_34930916_34943672	Pig.11892	2.42786	1.27969	0.0132133	0.199312	yes	up	0.0917683	0.092864	0.145112	0.260347	0.297296	0.247191	0.109915	0.268278	CBFA2T2-201	protein CBFA2T2 isoform X1 [Sus scrofa]	XP_020933765.1
Chr17_34930916_34945628	Pig.11892	2.06969	1.04941	0.0297178	0.28746	yes	up	0.137653	0.065551	0.204232	0.260347	0.224623	0.36392	0.135812	0.282963	CBFA2T2-201	protein CBFA2T2 isoform X1 [Sus scrofa]	XP_020933765.1
Chr17_49083675_49087890	Pig.14984	21.5907	4.43234	0.0447022	1	yes	up	0	0	0	0.0342562	0	0.034332	0	0.0228628	ZNFX1-201	NFX1-type zinc finger-containing protein 1 [Sus scrofa]	XP_020933177.1
Chr17_51000006_51005416	Pig.09982	2.99316	1.58167	0.0186181	0.230437	yes	up	0.0630907	0.0491633	0.0752434	0.27405	0.132131	0.157927	0.0624991	0.188036	NFATC2-201	nuclear factor of activated T-cells, cytoplasmic 2 isoform X1 [Sus scrofa]	XP_005673069.1
Chr18_16093250_16098970	Pig.01293	0.0658198	-3.92533	0.0182973	0.229432	yes	down	0	0.0382381	0.0161236	0	0	0	0.0181206	0	EXOC4-201	exocyst complex component 4 isoform X2 [Sus scrofa]	XP_020934481.1
Chr18_18270856_18323820	MSTRG.40398	11.1988	3.48527	0.0223711	0.26017	yes	up	0	0.0109252	0	0.0479587	0.0528526	0.0274656	0.00364172	0.042759	0	0	XP_020954391.1
Chr18_18270856_18358987	MSTRG.40398	49.2649	5.62249	0.00019627	0.0175893	yes	up	0	0	0	0.102769	0.0264263	0.0205992	0	0.0499314	0	0	XP_020954391.1
Chr18_18299792_18358987	MSTRG.40398	31.8346	4.99253	0.0157934	0.213878	yes	up	0	0	0	0.0137025	0.0396394	0.0480649	0	0.0338023	0	0	XP_020954391.1
Chr18_2037034_2043252	Pig.15539	0.104642	-3.25647	0.0420261	0.325257	yes	down	0.011471	0.0218503	0	0	0	0	0.0111071	0	LMBR1-201	limb region 1 protein homolog isoform X1 [Sus scrofa]	XP_020934816.1
Chr18_25510138_25527479		0.484388	-1.04577	0.0422661	0.325257	yes	down	0.33266	0.213041	0.472959	0.0959174	0.178377	0.226592	0.339553	0.166962	#N/A	#N/A	#N/A
Chr18_2812373_2818304	Pig.15536	0.262494	-1.92964	0.0128036	0.195063	yes	down	0.0401487	0.0764762	0.0591198	0.0205537	0.0132131	0.0137328	0.0585816	0.0158332	Rbm33	LOW QUALITY PROTEIN: RNA-binding protein 33 [Sus scrofa]	XP_020934696.1
Chr18_31666003_31703354	Pig.01383	0.151683	-2.72087	0.0149274	0.21086	yes	down	0.0229421	0.0163878	0.0483708	0	0	0.0137328	0.0292335	0.00457761	MDFIC-201	myoD family inhibitor domain-containing protein isoform X1 [Sus scrofa]	XP_003134810.3
Chr18_3313147_3314482	Pig.15530	2.07111	1.0504	0.0487205	0.345444	yes	up	0.0401487	0.092864	0.145112	0.0890662	0.184984	0.315855	0.0927083	0.196635	PAXIP1-201	PAX-interacting protein 1 isoform X1 [Sus scrofa]	XP_020934286.1
Chr18_34270406_34280336	MSTRG.40641,Pig.01392	0.298928	-1.74213	0.00273645	0.0779692	yes	down	0.103239	0.125639	0.123614	0.0479587	0.0132131	0.0480649	0.117498	0.0364122	#N/A	#N/A	#N/A
Chr18_41405196_41419587	Pig.07058	0.04618	-4.43659	0.000736736	0.036207	yes	down	0.011471	0.0109252	0.0591198	0	0	0	0.027172	0	AVL9-201	late secretory pathway protein AVL9 homolog isoform X2 [Sus scrofa]	XP_020934662.1
Chr18_49965466_49966837	Pig.15666	0.133438	-2.90576	0.0400994	0.318817	yes	down	0	0.0163878	0.0107491	0	0	0	0.00904561	0	TNS3-201	tensin-3 isoform X4 [Sus scrofa]	XP_020935014.1
Chr18_5421103_5454693	Pig.13668	0.391991	-1.35111	0.0430152	0.326038	yes	down	0.0860328	0.0491633	0.11824	0	0.046246	0.0549313	0.0844786	0.0337258	KMT2C-201	histone-lysine N-methyltransferase 2C isoform X1 [Sus scrofa]	XP_020934780.1
ChrX_103903248_103914281		3.06006	1.61356	0.00215804	0.0708636	yes	up	0.0688263	0.109252	0.145112	0.335711	0.270869	0.398252	0.10773	0.334944	#N/A	#N/A	#N/A
ChrX_112727741_112741438	Pig.04480	0.034827	-4.84365	0.000370928	0.0245699	yes	down	0.0401487	0.0273129	0.0376217	0	0	0	0.0350278	0	HPRT1-201	hypoxanthine-guanine phosphoribosyltransferase isoform X1 [Sus scrofa]	XP_020935162.1
ChrX_11445105_11457569	Pig.06016	0.0603691	-4.05005	0.00384506	0.0939302	yes	down	0.011471	0.0273129	0.0214981	0	0	0	0.020094	0	WWC3-201	protein WWC3 [Sus scrofa]	XP_013841331.2
ChrX_116987066_116999939	Pig.08395	4.25641	2.08964	0.0266566	0.271648	yes	up	0.0172066	0.0163878	0	0.0685124	0.0330328	0.0480649	0.0111981	0.0498701	ATP11C-201	phospholipid-transporting ATPase IG isoform X1 [Sus scrofa]	XP_020935853.1
ChrX_18138664_18216807	Pig.05975	10.3357	3.36956	0.0475893	0.341992	yes	up	0	0	0	0	0	0.034332	0	0.011444	REPS2-201	ralBP1-associated Eps domain-containing protein 2 isoform X1 [Sus scrofa]	XP_020936433.1
ChrX_20814686_20820349	Pig.01772	0.0872338	-3.51897	0.0322955	0.289424	yes	down	0	0.0163878	0.0268726	0	0	0	0.0144201	0	BCLAF3-203	uncharacterized protein CXorf23 homolog isoform X2 [Sus scrofa]	XP_020936442.1
ChrX_24791587_24795340		0.389985	-1.35851	0.00093036	0.0404205	yes	down	0.149124	0.142027	0.150487	0.0822149	0.0396394	0.0549313	0.147213	0.0589285	#N/A	#N/A	#N/A
ChrX_32827680_32872783	Pig.01823	0.0466608	-4.42164	0.00727761	0.139465	yes	down	0.011471	0.0437007	0.0214981	0	0	0	0.0255566	0	DMD-205	dystrophin isoform X1 [Sus scrofa]	XP_020935207.1
ChrX_94780501_94789821	Pig.02450,MSTRG.42159	0.267554	-1.9021	0.00280653	0.0791804	yes	down	0.567817	0.393306	0.800805	0.137025	0.165164	0.17166	0.587309	0.15795	#N/A	#N/A	#N/A
Scaffold1223_37884_38702	Pig.22107	0.305334	-1.71154	0.0423784	0.325257	yes	down	0.0401487	0.0819388	0.0752434	0.0342562	0.0132131	0.0137328	0.065777	0.0204007	ZMYM5	zinc finger MYM-type protein 5 isoform X1 [Sus scrofa]	XP_020921082.1
Scaffold124_5105139_5113215	Pig.11268	3.71405	1.89299	0.0384406	0.315412	yes	up	0.0172066	0.0218503	0.0107491	0.0959174	0.046246	0.0480649	0.016602	0.0634094	TET1-201	methylcytosine dioxygenase TET1 [Sus scrofa]	NP_001302701.1
Scaffold124_5184262_5193508	Pig.11269	0.356489	-1.48807	0.0311522	0.288232	yes	down	0.0860328	0.065551	0.155861	0.0342562	0.0528526	0.0205992	0.102482	0.0359027	CCAR1-205	cell division cycle and apoptosis regulator protein 1 isoform X2 [Sus scrofa]	XP_020928155.1
Scaffold124_5193096_5197695	Pig.11269	0.0885396	-3.49753	0.0379842	0.315412	yes	down	0.0172066	0.0218503	0	0	0	0	0.013019	0	CCAR1-205	cell division cycle and apoptosis regulator protein 1 isoform X2 [Sus scrofa]	XP_020928155.1
Scaffold158_4430821_4444232		3.11273	1.63818	0.0139914	0.204961	yes	up	0.0458842	0.152952	0.0161236	0.260347	0.198197	0.26779	0.0716534	0.242111	#N/A	#N/A	#N/A
Scaffold196_740027_748804	Pig.14393	0.242166	-2.04593	0.0429571	0.326038	yes	down	0.0229421	0.0491633	0.0698689	0.0205537	0.0132131	0	0.0473247	0.0112556	PTK2-202	focal adhesion kinase 1 isoform X4 [Sus scrofa]	XP_020944482.1
Scaffold196_757779_766655	Pig.14393	0.0956419	-3.38621	0.0404813	0.319774	yes	down	0.011471	0.0109252	0.0161236	0	0	0	0.0128399	0	PTK2-202	focal adhesion kinase 1 isoform X4 [Sus scrofa]	XP_020944482.1
Scaffold249_1778082_1785309	Pig.16601	0.0652633	-3.93758	0.0254962	0.266051	yes	down	0.0172066	0.0218503	0.0161236	0	0	0	0.0183935	0	AQR-201	intron-binding protein aquarius isoform X1 [Sus scrofa]	XP_020953930.1
Scaffold249_2002906_2003964		0.09082	-3.46085	0.0160227	0.215249	yes	down	0.0229421	0.0163878	0	0	0	0	0.0131099	0	#N/A	#N/A	#N/A
Scaffold288_854949_855512	Pig.17809	46.3186	5.53352	0.000575585	0.0316708	yes	up	0	0	0	0.0342562	0.0198197	0.0961297	0	0.0500686	LAPTM4B-202	lysosomal-associated transmembrane protein 4B [Sus scrofa]	XP_005655413.3
Scaffold3265_5751_23150		76.9554	6.26595	0.0458371	0.334884	yes	up	0	0	0	0.0822149	0.0396394	0.123595	0	0.0818166	#N/A	#N/A	#N/A
Scaffold355_330971_367375	Pig.19337	0.0566534	-4.14169	0.0184153	0.229488	yes	down	0.0229421	0.0109252	0.0322472	0	0	0	0.0220381	0	SCMH1-201	polycomb protein SCMH1 isoform X1 [Sus scrofa]	XP_020952602.1
Scaffold355_403360_409180	Pig.19337	2.75675	1.46297	0.000849842	0.0397302	yes	up	0.0917683	0.0600885	0.11824	0.21924	0.21141	0.329588	0.0900321	0.253413	SCMH1-201	polycomb protein SCMH1 isoform X1 [Sus scrofa]	XP_020952602.1
Scaffold419_205122_226753	Pig.20268	0.0378596	-4.7232	0.000937053	0.0404205	yes	down	0.011471	0.0382381	0.0483708	0	0	0	0.0326933	0	RNF216-201	E3 ubiquitin-protein ligase RNF216 isoform X2 [Sus scrofa]	XP_020941708.1
Scaffold419_234994_255861		0.0901957	-3.4708	0.0161749	0.215249	yes	down	0.0401487	0	0	0	0	0	0.0133829	0	#N/A	#N/A	#N/A
Scaffold4454_90_254	MSTRG.44768	0.00765726	-7.02896	0.0272146	0.274348	yes	down	0	0.125639	0.397715	0	0	0	0.174452	0	0	0	AMB36376.1
Scaffold481_188686_198483	Pig.20775	5.1212	2.35648	0.0383787	0.315412	yes	up	0	0.0218503	0	0.027405	0.0264263	0.0686641	0.00728345	0.0408318	EDEM3-201	ER degradation-enhancing alpha-mannosidase-like protein 3 isoform X2 [Sus scrofa]	XP_020958284.1

## Sheet: N90D_M vs N150D_M_DEcircRNAs
circRNA id	Host gene id	FC(N150D_M/N90D_M)	Log2FC(N150D_M/N90D_M)	Pvalue	Padjust	Significant	Regulate	N90D_M1	N90D_M2	N90D_M3	N150D_M1	N150D_M2	N150D_M3	N90D_M	N150D_M	gene_name	description	nr_hit_name
Chr01_101874255_101891261	Pig.03333	0.0569672	-4.13373	0.0186629	0.621179	yes	down	0.0541905	0.0277804	0.0217864	0	0	0	0.0345858	0	ZNF236-201	zinc finger protein 236 isoform X1 [Sus scrofa]	XP_020954699.1
Chr01_11575048_11579583		2.56432	1.35857	0.0121305	0.485898	yes	up	0.0232245	0.131957	0.0435727	0.107831	0.170966	0.0650352	0.0662514	0.114611	#N/A	#N/A	#N/A
Chr01_126588251_126599240	Pig.10719	8.29968	3.05306	0.000779184	0.0877074	yes	up	0.030966	0	0.0145242	0.0876131	0.123096	0.0433568	0.0151634	0.0846885	MGA-201	LOW QUALITY PROTEIN: MAX gene-associated protein [Sus scrofa]	XP_020953037.1
Chr01_127279986_127292153	Pig.14349	14.4653	3.85452	0.00190609	0.157733	yes	up	0.015483	0.0208353	0	0.12805	0.136773	0.0794875	0.0121061	0.11477	ZNF106-201	zinc finger protein 106 isoform X1 [Sus scrofa]	XP_005659765.1
Chr01_128470328_128472537	Pig.14318	2.77168	1.47076	0.000561318	0.0666195	yes	up	0.061932	0.145847	0.0871455	0.229142	0.164128	0.13007	0.0983082	0.174447	MFAP1-201	PREDICTED: microfibrillar-associated protein 1 isoform X1 [Cricetulus griseus]	XP_003815004.1
Chr01_129010315_129022227	Pig.14315	58.5282	5.87106	3.00163e-05	0.0073175	yes	up	0	0	0	0.0741341	0.0273546	0.0433568	0	0.0482818	CASC4-201	protein CASC4 isoform X1 [Sus scrofa]	XP_020952200.1
Chr01_134868579_134888642	MSTRG.1863,Pig.02307	36.4234	5.18679	0.0217557	0.668205	yes	up	0	0	0	0.0741341	0	0.0144523	0	0.0295288	#N/A	#N/A	#N/A
Chr01_134870766_134875868	MSTRG.1863,Pig.02307	3.68477	1.88157	0.039447	0.889531	yes	up	0.0232245	0.062506	0	0.0876131	0.0752252	0.0433568	0.0285768	0.0687317	#N/A	#N/A	#N/A
Chr01_134883950_134888642	MSTRG.1863,Pig.02307	23.7995	4.57286	0.00285831	0.206256	yes	up	0	0	0	0.0606552	0	0	0	0.0202184	#N/A	#N/A	#N/A
Chr01_134982805_135001147	Pig.02305	15.4018	3.94503	0.0206049	0.648672	yes	up	0	0	0	0.0134789	0	0.0216784	0	0.0117191	TRPM7-201	transient receptor potential cation channel subfamily M member 7 isoform X1 [Sus scrofa]	XP_023989567.2
Chr01_134987666_135001147	Pig.02305	7.27678	2.8633	2.49224e-11	7.49333e-08	yes	up	0.0696735	0.0902864	0.0435727	0.411107	0.341933	0.209558	0.0678442	0.320866	TRPM7-201	transient receptor potential cation channel subfamily M member 7 isoform X1 [Sus scrofa]	XP_023989567.2
Chr01_134990236_135001147	Pig.02305	6.75371	2.75568	0.000937806	0.0995568	yes	up	0	0.0486157	0.0145242	0.12131	0.0752252	0.0722614	0.0210467	0.089599	TRPM7-201	transient receptor potential cation channel subfamily M member 7 isoform X1 [Sus scrofa]	XP_023989567.2
Chr01_140726906_140759222	Pig.02266	6.87971	2.78235	0.00149312	0.135149	yes	up	0.0387075	0.125012	0.0726212	0.613291	0.280385	0.151749	0.0787802	0.348475	TEX9-202	testis-expressed sequence 9 protein [Sus scrofa]	NP_001231528.1
Chr01_140733143_140759222	Pig.02266	8.54191	3.09456	7.12908e-06	0.00247324	yes	up	0.0541905	0.284749	0.0217864	0.269579	1.88063	0.22401	0.120242	0.791406	TEX9-202	testis-expressed sequence 9 protein [Sus scrofa]	NP_001231528.1
Chr01_146320093_146329661	Pig.02237	9.40893	3.23403	0.0116457	0.478659	yes	up	0	0.0555608	0	0.155008	0.239353	0	0.0185203	0.131454	VPS13C-201	vacuolar protein sorting-associated protein 13C isoform X2 [Sus scrofa]	XP_020950024.1
Chr01_162166054_162169510	Pig.08979	3.13327	1.64767	0.00309369	0.215284	yes	up	0.402558	0.194463	0.188815	0.195445	0.335094	0.838232	0.261945	0.456257	SETBP1-201	SET-binding protein isoform X1 [Sus scrofa]	XP_013844009.2
Chr01_173364048_173366484	Pig.07316	0.247026	-2.01726	0.0420829	0.925824	yes	down	0.10064	0.0763962	0.0508348	0.0202184	0	0.0144523	0.0759568	0.0115569	BCKDHB-201	2-oxoisovalerate dehydrogenase subunit beta, mitochondrial isoform X1 [Sus scrofa]	XP_020938559.1
Chr01_181973310_182068263	Pig.00734	77.1518	6.26963	0.000529917	0.0637314	yes	up	0	0	0	0.0741341	0.0889025	0.0433568	0	0.0687978	REV3L-201	DNA polymerase zeta catalytic subunit isoform X1 [Sus scrofa]	XP_020946897.1
Chr01_214381281_214383038		0.0552131	-4.17885	0.00156408	0.13647	yes	down	0.030966	0.0486157	0.0290485	0	0	0	0.0362101	0	#N/A	#N/A	#N/A
Chr01_220107896_220139531	Pig.03978,MSTRG.2821	12.1606	3.60414	0.0310479	0.793664	yes	up	0	0.0486157	0.0363106	0.0539157	0.50606	0.158975	0.0283088	0.23965	#N/A	#N/A	#N/A
Chr01_222542490_222572939	Pig.03989	9.50467	3.24864	0.00365004	0.236807	yes	up	0.015483	0.0138902	0	0.0673947	0.0341933	0.0650352	0.00979107	0.055541	TRMT11-201	tRNA (guanine(10)-N2)-methyltransferase homolog isoform X1 [Sus scrofa]	XP_001928696.1
Chr01_239184899_239196493	Pig.05196	0.0576702	-4.11603	0.0320165	0.797759	yes	down	0.046449	0.0347255	0.0217864	0	0	0	0.0343203	0	UTRN	utrophin isoform X4 [Sus scrofa]	XP_020927918.1
Chr01_243628444_243642380	Pig.05180	23.3109	4.54294	0.0153001	0.539089	yes	up	0	0	0	0.0336973	0.0341933	0	0	0.0226302	PPIL4-201	PREDICTED: peptidyl-prolyl cis-trans isomerase-like 4 isoform X1 [Dasypus novemcinctus]	XP_004752831.1
Chr01_248337313_248340068		0.23693	-2.07747	0.00355406	0.232302	yes	down	0.363851	0.0972315	0.428465	0.0539157	0.0683865	0.0216784	0.296516	0.0479936	#N/A	#N/A	#N/A
Chr01_3467978_3519068	Pig.03801	0.19827	-2.33446	0.0118697	0.483986	yes	down	0.077415	0.0486157	0.0798833	0.0134789	0.0136773	0	0.068638	0.00905208	TMEM245-202	transmembrane protein 245 isoform X1 [Sus scrofa]	XP_005660377.1
Chr01_37908888_37959001	Pig.03277	24.0394	4.58733	0.0340893	0.817781	yes	up	0	0	0	0.0134789	0	0.0361307	0	0.0165365	KIAA2026-201	uncharacterized protein KIAA2026 homolog isoform X1 [Sus scrofa]	XP_003121963.3
Chr01_37930886_37959001	Pig.03277	13.51	3.75596	3.49846e-08	3.15561e-05	yes	up	0.0541905	0.0347255	0.0217864	0.673947	0.198321	0.101166	0.0369008	0.324478	KIAA2026-201	uncharacterized protein KIAA2026 homolog isoform X1 [Sus scrofa]	XP_003121963.3
Chr01_38862808_38873351	Pig.03271	0.0626262	-3.99709	0.0294384	0.780984	yes	down	0.0387075	0.0347255	0.0217864	0	0	0	0.0317398	0	KDM4C-201	lysine-specific demethylase 4C isoform X1 [Sus scrofa]	XP_020919517.1
Chr01_48784512_48796978	Pig.03254	22.3994	4.48539	0.00259833	0.191961	yes	up	0	0	0	0.0404368	0	0.0144523	0	0.0182964	CNTLN-201	centlein isoform X1 [Sus scrofa]	XP_020918932.1
Chr01_64609502_64621380	Pig.05408	3.5249	1.81758	0.0194493	0.633331	yes	up	0.0541905	0.138902	0.0290485	0.0808736	0.417158	0.0794875	0.074047	0.192506	MNAT1-201	CDK-activating kinase assembly factor MAT1 [Sus scrofa]	NP_001159788.1
Chr01_64609502_64632618	Pig.05408	4.28429	2.09906	0.0205454	0.648672	yes	up	0.030966	0.0208353	0	0.0336973	0.0683865	0.0433568	0.0172671	0.0484802	MNAT1-201	CDK-activating kinase assembly factor MAT1 [Sus scrofa]	NP_001159788.1
Chr01_69500313_69509750		47.4228	5.56751	0.00115654	0.119908	yes	up	0	0	0	0.0539157	0.0136773	0.0433568	0	0.0369833	#N/A	#N/A	#N/A
Chr01_84804013_84812312	Pig.02859	7.89284	2.98055	0.00019983	0.0327721	yes	up	0.0232245	0.0277804	0.0217864	0.181966	0.129934	0.0650352	0.0242638	0.125645	MIA2	melanoma inhibitory activity protein 2 isoform X2 [Sus scrofa]	XP_020929628.1
Chr01_85074434_85093387		3.4451	1.78455	0.0269329	0.74292	yes	up	0.0232245	0.0555608	0.0508348	0.12805	0.116257	0.050583	0.0432067	0.0982966	#N/A	#N/A	#N/A
Chr01_85074434_85130540		8.02655	3.00478	0.0304103	0.789417	yes	up	0.015483	0.0208353	0	0.0876131	0.0683865	0.0361307	0.0121061	0.0640434	#N/A	#N/A	#N/A
Chr01_88880418_88881721	Pig.02830	0.0283041	-5.14285	0.00880031	0.413431	yes	down	0.0387075	0.111122	0.0653591	0	0	0	0.0717294	0	COG3-204	PREDICTED: kidney mitochondrial carrier protein 1 isoform X1 [Camelus dromedarius]	XP_005896811.1
Chr01_89396683_89411464	Pig.02826	14.8007	3.88759	0.0303913	0.789417	yes	up	0	0	0	0.0202184	0	0.0144523	0	0.0115569	ZC3H13-201	zinc finger CCCH domain-containing protein 13 isoform X8 [Sus scrofa]	XP_020921252.1
Chr02_10870704_10875081	Pig.14571	6.84556	2.77517	0.0134152	0.504174	yes	up	0	0.0277804	0	0.0741341	0.0273546	0.0216784	0.00926014	0.0410557	MATR3	PREDICTED: matrin-3-like isoform X1 [Lipotes vexillifer]	XP_013850634.1
Chr02_10873867_10875081	Pig.14571	0.467586	-1.0967	0.00307919	0.215284	yes	down	1.20767	1.4932	1.80827	0.593073	0.683865	0.173427	1.50305	0.483455	MATR3	PREDICTED: matrin-3-like isoform X1 [Lipotes vexillifer]	XP_013850634.1
Chr02_110029999_110048860	Pig.09907	94.158	6.55701	0.00467008	0.269384	yes	up	0	0	0	0.107831	0.0752252	0.0578091	0	0.0802886	USP47-201	ubiquitin carboxyl-terminal hydrolase 47 isoform X2 [Sus scrofa]	XP_020938974.1
Chr02_120685153_120715387	Pig.05931	0.120966	-3.04733	0.0383547	0.880304	yes	down	0	0.0277804	0.0217864	0	0	0	0.0165223	0	GAS2-201	growth arrest-specific protein 2 [Sus scrofa]	XP_020938899.1
Chr02_129529725_129544183	Pig.12557	4.52463	2.1778	0.000290253	0.0414368	yes	up	0.0232245	0.0486157	0.0944076	0.175226	0.123096	0.158975	0.0554159	0.152432	QSER1-205	glutamine and serine-rich protein 1 [Sus scrofa]	XP_013849914.1
Chr02_129557508_129571492	Pig.12557	21.8836	4.45177	0.0013544	0.128218	yes	up	0	0	0.0145242	0.0808736	0.109418	0.0289045	0.00484141	0.0730655	QSER1-205	glutamine and serine-rich protein 1 [Sus scrofa]	XP_013849914.1
Chr02_130990677_131007514	Pig.12571	0.184144	-2.4411	0.0357088	0.839671	yes	down	0.061932	0.0347255	0.0145242	0	0.0136773	0	0.0370606	0.0045591	CAT-201	catalase [Sus scrofa]	NP_999466.2
Chr02_142242602_142243343		0.406216	-1.29968	0.00416007	0.248502	yes	down	0.332885	0.173628	0.275961	0.0673947	0.10258	0.0433568	0.260824	0.0711104	#N/A	#N/A	#N/A
Chr02_15163734_15169181	Pig.17377	0.225499	-2.14881	0.0201793	0.646132	yes	down	0.139347	0.0902864	0.232388	0.0269579	0.0478706	0	0.154007	0.0249428	SEC24A-201	protein transport protein Sec24A [Sus scrofa]	NP_001230853.1
Chr02_158152493_158154207	Pig.17122	6.85865	2.77792	0.00561051	0.307249	yes	up	0.015483	0	0.0145242	0.0269579	0.0615479	0.0433568	0.0100024	0.0439542	PPFIA1-201	liprin-alpha-1 isoform X8 [Sus scrofa]	XP_020938327.1
Chr02_161624907_161630872	Pig.20939	0.105649	-3.24265	0.0352387	0.834259	yes	down	0.10064	0.0416706	0.058097	0.0134789	0	0	0.0668024	0.00449298	EHMT2-201	histone-lysine N-methyltransferase EHMT1 isoform X3 [Sus scrofa]	XP_020936858.1
Chr02_17228457_17230614	Pig.12421	15.7438	3.97671	0.028757	0.769699	yes	up	0	0.0138902	0	0.0606552	0.0547092	0.0289045	0.00463007	0.0480897	RAD50	DNA repair protein RAD50 [Sus scrofa]	XP_003354322.2
Chr02_173224385_173292082		3.98408	1.99425	0.00949841	0.434902	yes	up	0.030966	0.0208353	0.0217864	0.0404368	0.116257	0.0433568	0.0245292	0.0666836	#N/A	#N/A	#N/A
Chr02_18121057_18128413	Pig.12410	61.6461	5.94594	2.36153e-05	0.00633089	yes	up	0	0	0	0.0539157	0.0752252	0.0361307	0	0.0550905	FNIP1-201	folliculin-interacting protein 1 isoform X1 [Sus scrofa]	XP_020941073.1
Chr02_18600695_18607910	Pig.12406	5.59531	2.48422	0.000462774	0.0579752	yes	up	0.015483	0.0555608	0.0508348	0.0741341	0.259869	0.122844	0.0406262	0.152282	LYRM7-204	complex III assembly factor LYRM7 isoform X3 [Sus scrofa]	XP_020941079.1
Chr02_2353238_2357829	Pig.11984	0.0907718	-3.46161	0.0278404	0.751794	yes	down	0.0232245	0.0138902	0.0290485	0	0	0	0.0220544	0	HTR4-204	5-hydroxytryptamine receptor 4 [Sus scrofa]	NP_001001267.1
Chr02_37476471_37491627	Pig.05628	0.0401752	-4.63755	0.0150937	0.536004	yes	down	0.0387075	0.0972315	0.0145242	0	0	0	0.0501544	0	MAN2A1-205	alpha-mannosidase 2 [Sus scrofa]	XP_003123871.4
Chr02_60658293_60663530	Pig.02468	7.04501	2.8166	0.0316726	0.795784	yes	up	0.0696735	0	0	0.0673947	0.0410319	0.166201	0.0232245	0.0915426	VCAN-201	versican core protein isoform X1 [Sus scrofa]	XP_020936732.1
Chr02_64424585_64436763	Pig.02492,MSTRG.4458	18.3946	4.20121	0.0166979	0.579287	yes	up	0	0	0	0.0202184	0	0.0216784	0	0.0139656	#N/A	#N/A	#N/A
Chr02_66597676_66603443	Pig.02507	2.04117	1.0294	0.0492748	1	yes	up	0.108381	0.0555608	0.0726212	0.107831	0.0957411	0.101166	0.0788544	0.101579	AGGF1	angiogenic factor with G patch and FHA domains 1 [Sus scrofa]	XP_003123763.1
Chr02_70913021_70914547	Pig.02543	2.27272	1.18442	0.0408166	0.911158	yes	up	0.092898	0.166683	0.130718	0.101092	0.307739	0.173427	0.1301	0.194086	SIMC1-201	SUMO-interacting motif-containing protein 1 isoform X1 [Sus scrofa]	XP_005661533.1
Chr02_86895228_86897561	MSTRG.5373,Pig.20295	0.469681	-1.09025	0.0169243	0.584893	yes	down	0.433524	0.882028	0.769785	0.330234	0.239353	0.0794875	0.695112	0.216358	#N/A	#N/A	#N/A
Chr02_92738870_92744854	MSTRG.5482	0.231839	-2.10881	6.5966e-16	5.95013e-12	yes	down	0.975429	1.06955	0.915027	0.208923	0.170966	0.0722614	0.986668	0.150717	0	0	XP_020935332.1
Chr02_93039238_93079314	Pig.06424	0.0536584	-4.22005	0.00034139	0.0450875	yes	down	0.170313	0.0763962	0.290485	0	0.020516	0	0.179065	0.00683865	CYP4F8-201	cytochrome P450, family 4, subfamily F, polypeptide 55 isoform X3 [Sus scrofa]	XP_020935397.1
Chr03_105294932_105332185	Pig.16535	0.149089	-2.74576	0.0431055	0.936895	yes	down	0	0.062506	0.0726212	0	0.0136773	0	0.0450424	0.0045591	CLEC16A-201	protein CLEC16A isoform X1 [Sus scrofa]	XP_020942272.1
Chr03_106100779_106116835	Pig.17772	4.5624	2.18979	0.0342439	0.819311	yes	up	0	0.0277804	0.0217864	0.0336973	0.0341933	0.0650352	0.0165223	0.0443086	GSPT1-202	eukaryotic peptide chain release factor GTP-binding subunit ERF3A isoform X1 [Sus scrofa]	XP_020942248.1
Chr03_108839582_108909181		39.9389	5.31972	0.0134323	0.504174	yes	up	0	0	0	0.0336973	0	0.050583	0	0.0280934	#N/A	#N/A	#N/A
Chr03_126444700_126447071	Pig.21034	2.58653	1.37102	0.00373217	0.237072	yes	up	0.185796	0.194463	0.152505	0.161747	0.547092	0.231236	0.177588	0.313359	FBRS-201	probable fibrosin-1 [Sus scrofa]	XP_020942074.1
Chr03_133654793_133664301	MSTRG.10349,Pig.09034	0.124223	-3.00899	0.00497748	0.28237	yes	down	0.162572	0.0277804	0.0871455	0	0	0.0216784	0.0924991	0.00722614	#N/A	#N/A	#N/A
Chr03_20091718_20131946	Pig.20028	0.195741	-2.35298	0.0091474	0.423126	yes	down	0.061932	0.062506	0.0798833	0	0.0273546	0	0.0681071	0.0091182	ASXL2-201	putative Polycomb group protein ASXL2 isoform X1 [Sus scrofa]	XP_020943398.1
Chr03_20352519_20375493	Pig.20026	3.03325	1.60087	0.019287	0.633135	yes	up	0.0387075	0.0972315	0	0.12131	0.123096	0.0361307	0.045313	0.0935123	RAB10-203	ras-related protein Rab-10 [Mus musculus]	NP_057885.1
Chr03_26074398_26088941	Pig.06706	19.9181	4.31601	0.0318731	0.797745	yes	up	0	0	0	0.0134789	0	0.0289045	0	0.0141278	BIRC6-201	LOW QUALITY PROTEIN: baculoviral IAP repeat-containing protein 6 [Sus scrofa]	XP_020943315.1
Chr03_26300083_26317651	Pig.06707	0.0633443	-3.98064	0.02478	0.718701	yes	down	0.030966	0.0347255	0.0290485	0	0	0	0.03158	0	TTC27-201	LOW QUALITY PROTEIN: tetratricopeptide repeat protein 27 [Sus scrofa]	XP_020943314.1
Chr03_30444359_30445305	MSTRG.8087	2.13577	1.09476	0.0345325	0.82403	yes	up	0.10064	0.187518	0.0290485	0.202184	0.211998	0.050583	0.105735	0.154922	0	0	XP_003125283.3
Chr03_36704952_36705502		0.358561	-1.47971	0.0373805	0.866766	yes	down	0.131606	0.180573	0.0726212	0.0539157	0.020516	0.0144523	0.128266	0.029628	#N/A	#N/A	#N/A
Chr03_45601718_45637098	MSTRG.8253,Pig.04789,MSTRG.8254	0.337386	-1.56753	0.000212373	0.0336071	yes	down	0.185796	0.243079	0.283223	0.0673947	0.0615479	0.0289045	0.237366	0.0526157	#N/A	#N/A	#N/A
Chr03_48596408_48615983	Pig.04800	31.0613	4.95705	0.0224693	0.676117	yes	up	0	0	0	0.0202184	0.0410319	0.0216784	0	0.0276429	USP34-201	ubiquitin carboxyl-terminal hydrolase 34 isoform X1 [Sus scrofa]	XP_020943148.1
Chr03_49988991_50034685	Pig.04812	9.33473	3.22261	0.0460953	0.976008	yes	up	0	0	0	0	0.0273546	0	0	0.0091182	EHBP1-204	EH domain-binding protein 1 isoform X1 [Sus scrofa]	XP_020943128.1
Chr03_50015679_50034685	Pig.04812	12.6409	3.66003	0.0130622	0.502651	yes	up	0	0	0	0.0202184	0.0136773	0	0	0.0112986	EHBP1-204	EH domain-binding protein 1 isoform X1 [Sus scrofa]	XP_020943128.1
Chr03_56761987_56769941	Pig.04857	0.241311	-2.05103	0.00683814	0.346517	yes	down	0.147089	0.0833413	0.123456	0.0134789	0.020516	0.0216784	0.117962	0.0185578	TIA1-203	nucleolysin TIA-1 isoform X3 [Sus scrofa]	XP_020943059.1
Chr03_57680783_57732712	Pig.04872	28.8708	4.85154	0.0237743	0.700797	yes	up	0	0	0	0.0336973	0.0547092	0	0	0.0294688	ZNF638-202	zinc finger protein 638 isoform X4 [Sus scrofa]	XP_005662532.1
Chr03_57686609_57732712	Pig.04872	9.34026	3.22346	0.047214	0.99148	yes	up	0.015483	0	0	0.0606552	0.0410319	0	0.005161	0.0338957	ZNF638-202	zinc finger protein 638 isoform X4 [Sus scrofa]	XP_005662532.1
Chr03_75183979_75196214	Pig.13452	20.33	4.34554	0.00244621	0.183874	yes	up	0	0	0	0.0202184	0	0.0289045	0	0.0163743	IL1R1-202	interleukin-1 receptor type 1 isoform X1 [Sus scrofa]	XP_013851373.2
Chr03_76209366_76216392	Pig.09468,MSTRG.8682	0.152176	-2.71619	0.0276395	0.751794	yes	down	0.046449	0.0208353	0.0653591	0	0.0136773	0	0.0442145	0.0045591	#N/A	#N/A	#N/A
Chr03_82908801_82931818	Pig.09375	0.0654778	-3.93285	0.0442267	0.954365	yes	down	0.0541905	0.0208353	0.0145242	0	0	0	0.02985	0	KCMF1-201	PREDICTED: E3 ubiquitin-protein ligase KCMF1 [Nannospalax galili]	NP_001069743.1
Chr03_84636714_84655608	Pig.13165	31.7722	4.98969	0.00391321	0.243428	yes	up	0	0.0138902	0	0.155008	0.136773	0.0216784	0.00463007	0.104486	ZC3H6-201	zinc finger CCCH domain-containing protein 6 [Sus scrofa]	XP_020942684.1
Chr03_84651591_84655608	Pig.13165	14.9332	3.90045	0.0329852	0.806306	yes	up	0.015483	0	0	0.0539157	0.129934	0	0.005161	0.0612834	ZC3H6-201	zinc finger CCCH domain-containing protein 6 [Sus scrofa]	XP_020942684.1
Chr03_98788503_98847046	Pig.10357	0.0873141	-3.51764	0.0447265	0.960554	yes	down	0.0387075	0	0.0290485	0	0	0	0.0225853	0	CREBBP-201	CREB-binding protein [Sus scrofa]	XP_005662241.2
Chr04_110975015_110979306	Pig.01705	17.0287	4.08989	0.0140408	0.510507	yes	up	0	0	0	0.0269579	0.020516	0	0	0.0158246	ARHGAP29-201	rho GTPase-activating protein 29 [Sus scrofa]	XP_005663713.1
Chr04_110994123_110999920	Pig.01705	0.0865752	-3.5299	0.00233862	0.178765	yes	down	0.15483	0.118067	0.058097	0	0.020516	0	0.110331	0.00683865	ARHGAP29-201	rho GTPase-activating protein 29 [Sus scrofa]	XP_005663713.1
Chr04_111769121_111769588	Pig.01713	15.9177	3.99256	0.0371159	0.862849	yes	up	0	0	0	0.0134789	0	0.0216784	0	0.0117191	CCDC18-201	coiled-coil domain-containing protein 18 isoform X1 [Sus scrofa]	XP_020945847.1
Chr04_111830354_111849701	Pig.01713	25.9168	4.69582	0.039319	0.888865	yes	up	0	0	0	0.0471763	0	0.0144523	0	0.0205428	CCDC18-201	coiled-coil domain-containing protein 18 isoform X1 [Sus scrofa]	XP_020945847.1
Chr04_112432957_112452095	Pig.01720	13.1091	3.7125	0.0299149	0.786685	yes	up	0	0	0	0	0.0410319	0	0	0.0136773	EVI5-208	ecotropic viral integration site 5 protein homolog isoform X4 [Sus scrofa]	XP_020945870.1
Chr04_112444369_112478901	Pig.01720	14.1802	3.82581	0.0133836	0.504174	yes	up	0	0	0	0.0202184	0	0.0144523	0	0.0115569	EVI5-208	ecotropic viral integration site 5 protein homolog isoform X4 [Sus scrofa]	XP_020945870.1
Chr04_113700873_113752559		5.27517	2.39922	0.0113958	0.473689	yes	up	0	0.0416706	0.0217864	0.101092	0.0341933	0.0650352	0.0211523	0.0667735	#N/A	#N/A	#N/A
Chr04_113748733_113752559	Pig.01735	4.33738	2.11682	0.00223224	0.174839	yes	up	0.0387075	0.0416706	0.0435727	0.0404368	0.0889025	0.180653	0.041317	0.103331	ZNF644-207	zinc finger protein 644 isoform X1 [Sus scrofa]	XP_020945920.1
Chr04_117301750_117319079	Pig.01755	3.62612	1.85843	0.00243107	0.183874	yes	up	0.10064	0.208353	0.0290485	0.343713	0.287223	0.166201	0.11268	0.265712	SH3GLB1-201	endophilin-B1 isoform X1 [Sus scrofa]	XP_005663778.1
Chr04_117311656_117319079	Pig.01755	2.73557	1.45184	0.0098211	0.4368	yes	up	0.201279	0.458377	0.108932	0.512199	0.677027	0.238463	0.256196	0.475896	SH3GLB1-201	endophilin-B1 isoform X1 [Sus scrofa]	XP_005663778.1
Chr04_13085270_13092315	Pig.03742	0.131904	-2.92244	0.039584	0.890394	yes	down	0.046449	0	0	0	0	0	0.015483	0	ENPP2-201	ectonucleotide pyrophosphatase/phosphodiesterase family member 2 isoform X1 [Sus scrofa]	XP_013851977.1
Chr04_22743270_22773855	Pig.03771	7.58417	2.92299	2.36718e-06	0.00105341	yes	up	0.0232245	0.145847	0	0.215663	0.389803	0.231236	0.0563572	0.278901	EMC2-201	ER membrane protein complex subunit 2 isoform X4 [Sus scrofa]	XP_020944677.1
Chr04_30299278_30309026	Pig.08107	0.190754	-2.39021	0.0258634	0.730901	yes	down	0.046449	0.104177	0.0508348	0	0.0273546	0	0.0671535	0.0091182	OXR1-205	oxidation resistance protein 1 isoform X4 [Sus scrofa]	XP_013852007.1
Chr04_30299278_30333225	Pig.08107	53.0762	5.72999	0.000149675	0.0267523	yes	up	0	0	0	0	0.0683865	0.0650352	0	0.0444739	OXR1-205	oxidation resistance protein 1 isoform X4 [Sus scrofa]	XP_013852007.1
Chr04_4049704_4061942	Pig.13340	0.205043	-2.286	0.00532503	0.297604	yes	down	0.092898	0.0902864	0.0871455	0.0134789	0	0.0216784	0.0901099	0.0117191	ASAP1-201	arf-GAP with SH3 domain, ANK repeat and PH domain-containing protein 1 isoform X1 [Sus scrofa]	XP_020944565.1
Chr04_42637595_42638483	Pig.01470	10.1745	3.34689	0.000240352	0.0361329	yes	up	0.015483	0.0208353	0	0.12131	0.0410319	0.0650352	0.0121061	0.0757925	ZBTB10-201	zinc finger and BTB domain-containing protein 10 isoform X1 [Sus scrofa]	XP_001928312.1
Chr04_58547233_58562535	Pig.14062,MSTRG.11105	41.1731	5.36363	0.000428108	0.0543878	yes	up	0	0	0	0.0471763	0.0752252	0	0	0.0408005	#N/A	#N/A	#N/A
Chr04_59194539_59221175	Pig.14064	30.2757	4.92009	0.001534	0.13647	yes	up	0	0	0	0.0202184	0.0273546	0.0289045	0	0.0254925	CHD7-201	chromodomain-helicase-DNA-binding protein 7 isoform X1 [Sus scrofa]	XP_020944993.1
Chr04_67550881_67619743	Pig.04920	59.5267	5.89546	1.33504e-05	0.00401709	yes	up	0	0	0	0.0876131	0.0478706	0.0216784	0	0.0523873	KIFAP3-201	kinesin-associated protein 3 isoform X2 [Sus scrofa]	XP_001927795.3
Chr04_69592517_69611017	Pig.04945	0.0414344	-4.59303	0.0116746	0.478659	yes	down	0.046449	0.0694511	0.0290485	0	0	0	0.0483162	0	DCAF6-204	DDB1- and CUL4-associated factor 6 isoform X5 [Sus scrofa]	XP_020945113.1
Chr04_81136260_81147029	Pig.10526	0.041643	-4.58578	0.0173104	0.593687	yes	down	0.077415	0.0347255	0.0290485	0	0	0	0.047063	0	DAP3-201	28S ribosomal protein S29, mitochondrial isoform X2 [Sus scrofa]	XP_020945369.1
Chr04_81182357_81276967		8.91255	3.15584	0.0193731	0.633135	yes	up	0.030966	0.0208353	0	0.155008	0.129934	0.0361307	0.0172671	0.107024	#N/A	#N/A	#N/A
Chr04_81219645_81240382	Pig.10524	5.69306	2.5092	0.0451241	0.966791	yes	up	0.030966	0.0208353	0	0.114571	0.10258	0	0.0172671	0.0723836	ASH1L-201	histone-lysine N-methyltransferase ASH1L isoform X1 [Sus scrofa]	XP_020945350.1
Chr04_81240281_81262538	Pig.10524	0.0470701	-4.40905	0.00218293	0.174158	yes	down	0.061932	0.0138902	0.0508348	0	0	0	0.042219	0	ASH1L-201	histone-lysine N-methyltransferase ASH1L isoform X1 [Sus scrofa]	XP_020945350.1
Chr04_81276788_81289066	Pig.10524	2.04534	1.03234	0.00445722	0.261066	yes	up	0.356109	0.423651	0.472038	0.606552	0.977927	0.216784	0.417266	0.600421	ASH1L-201	histone-lysine N-methyltransferase ASH1L isoform X1 [Sus scrofa]	XP_020945350.1
Chr04_84437367_84480330	Pig.18107	4.45259	2.15465	0.0390118	0.884591	yes	up	0.0387075	0.0138902	0	0.0606552	0.0683865	0.0289045	0.0175326	0.0526488	SNX27-201	sorting nexin-27 [Bos taurus]	XP_003125809.1
Chr04_9772083_9785803		4.96811	2.3127	0.000787616	0.0877074	yes	up	0.0232245	0.104177	0.058097	0.38415	0.123096	0.0794875	0.0618327	0.195578	#N/A	#N/A	#N/A
Chr04_98096686_98108020		8.54475e-06	-16.8365	0.0193141	0.633135	yes	down	0	0.0347255	0	0	0	0	0.0115752	0	#N/A	#N/A	#N/A
Chr05_103221996_103229378	Pig.11737	0.0558461	-4.1624	0.0119655	0.483986	yes	down	0.015483	0.0208353	0.0726212	0	0	0	0.0363132	0	ZDHHC17-202	palmitoyltransferase ZDHHC17 [Aotus nancymaae]	XP_020948474.1
Chr05_103840636_103841996	Pig.13236	0.0707719	-3.82068	0.0230855	0.687233	yes	down	0.015483	0.0555608	0.0145242	0	0	0	0.0285227	0	HEBP1-201	heme-binding protein 1 [Sus scrofa]	NP_001011509.1
Chr05_20526478_20543229	Pig.19106	0.466422	-1.10029	0.0130957	0.502651	yes	down	0.394817	0.305585	0.472038	0.141529	0.136773	0.0794875	0.390813	0.119263	TBC1D22A-201	LOW QUALITY PROTEIN: TBC1 domain family member 22A [Sus scrofa]	XP_020947020.1
Chr05_31301375_31326900	Pig.05460	4.80826	2.26552	0.0102548	0.451213	yes	up	0.030966	0.0347255	0	0.0673947	0.10258	0.0433568	0.0218972	0.0711104	XPOT-201	exportin-T isoform X1 [Sus scrofa]	XP_020947599.1
Chr05_43684815_43744217	Pig.06613	43.9026	5.45623	4.50929e-05	0.00945902	yes	up	0	0	0	0.0336973	0.0547092	0.0289045	0	0.0391037	FGD4	FYVE, RhoGEF and PH domain-containing protein 4 isoform X1 [Sus scrofa]	XP_020947725.1
Chr05_43729794_43735400	Pig.06613	26.2949	4.71671	0.00789268	0.382215	yes	up	0	0	0	0	0.0273546	0.0361307	0	0.0211618	FGD4	FYVE, RhoGEF and PH domain-containing protein 4 isoform X1 [Sus scrofa]	XP_020947725.1
Chr05_48057014_48069096	Pig.06592	26.3882	4.72182	0.0141493	0.510507	yes	up	0	0	0	0.0202184	0	0.0361307	0	0.018783	PPFIBP1-201	liprin-beta-1 isoform X2 [Sus scrofa]	XP_013853229.2
Chr05_48391369_48407553	Pig.06589	0.105997	-3.2379	0.0278126	0.751794	yes	down	0	0.0277804	0.0290485	0	0	0	0.018943	0	ARNTL2-201	aryl hydrocarbon receptor nuclear translocator-like protein 2 isoform X1 [Sus scrofa]	XP_020947810.1
Chr05_60087028_60091213	Pig.09568	5.67175	2.50379	0.00261765	0.191961	yes	up	0.0541905	0.0138902	0	0.0336973	0.0957411	0.108392	0.0226936	0.0792768	ATF7IP-202	activating transcription factor 7-interacting protein 1 isoform X1 [Sus scrofa]	XP_005664117.1
Chr05_61728003_61728261	Pig.18710	0.0814921	-3.6172	0.0253383	0.72556	yes	down	0.030966	0.0277804	0.0145242	0	0	0	0.0244236	0	PTMS	PREDICTED: parathymosin, partial [Camelus bactrianus]	XP_010956138.1
Chr05_66647170_66689472	Pig.07503	45.3861	5.50418	0.0145307	0.522181	yes	up	0	0	0	0.0471763	0.0410319	0.0289045	0	0.0390376	ERC1-203	ELKS/Rab6-interacting/CAST family member 1 isoform X3 [Sus scrofa]	XP_020948632.1
Chr05_80967616_80976108	Pig.04041	0.116125	-3.10625	0.0427047	0.930425	yes	down	0.0232245	0.0138902	0.0145242	0	0	0	0.017213	0	WASHC3-203	WASH complex subunit 3 isoform X1 [Sus scrofa]	XP_020948336.1
Chr05_84175407_84176240	MSTRG.14449,Pig.04063	0.425277	-1.23352	0.0109345	0.465805	yes	down	0.921239	0.437542	0.268698	0.107831	0.157289	0.173427	0.542493	0.146183	#N/A	#N/A	#N/A
Chr06_11538093_11556397		6.28831	2.65267	0.0238979	0.702147	yes	up	0.030966	0	0	0.0336973	0.020516	0.0578091	0.010322	0.0373408	#N/A	#N/A	#N/A
Chr06_119036106_119051091	Pig.17188	0.124826	-3.00201	0.0170993	0.588686	yes	down	0.0696735	0.0416706	0.058097	0.0134789	0	0	0.0564804	0.00449298	SAE1-205	SUMO-activating enzyme subunit 1 isoform X1 [Sus scrofa]	XP_003127291.1
Chr06_119442930_119443236	Pig.17179	13.048	3.70575	0.0214864	0.668205	yes	up	0	0.0138902	0	0	0.0410319	0.0650352	0.00463007	0.0353557	PRKD2-201	serine/threonine-protein kinase D2 isoform X2 [Sus scrofa]	XP_020950267.1
Chr06_128170774_128185608	Pig.15966	2.83613	1.50392	0.000950611	0.0997036	yes	up	0.147089	0.152792	0.0653591	0.303276	0.259869	0.122844	0.121747	0.228663	LSM14A-201	protein LSM14 homolog A [Sus scrofa]	NP_001302727.1
Chr06_132076444_132109338	Pig.14529	69.7549	6.12422	0.00469433	0.269384	yes	up	0	0	0	0.0606552	0.164128	0	0	0.0749276	URI1-201	unconventional prefoldin RPB5 interactor 1 [Sus scrofa]	XP_003355879.1
Chr06_137662247_137667769		0.379135	-1.39922	0.0232603	0.690157	yes	down	0.332885	0.118067	0.167029	0.0471763	0.0752252	0.0361307	0.205993	0.052844	#N/A	#N/A	#N/A
Chr06_154483498_154503554	Pig.12809	0.179444	-2.47839	0.0385983	0.88141	yes	down	0.046449	0.0277804	0.0435727	0.0134789	0	0	0.0392674	0.00449298	SNTB2-201	beta-2-syntrophin [Bos taurus]	XP_026350890.1
Chr06_160725112_160742417	Pig.15713	9.26106	3.21118	7.13805e-05	0.0143078	yes	up	0.030966	0.0138902	0	0.0336973	0.129934	0.101166	0.0149521	0.0882659	CFDP1-201	craniofacial development protein 1 [Sus scrofa]	XP_020949434.1
Chr06_169608196_169618090	Pig.15499	0.369217	-1.43746	0.00925732	0.426026	yes	down	0.15483	0.131957	0.116194	0.0539157	0.020516	0.0216784	0.134327	0.0320367	MTHFSD-201	methenyltetrahydrofolate synthase domain-containing protein isoform X1 [Sus scrofa]	XP_020949357.1
Chr06_171059535_171065195	Pig.21444	0.497856	-1.0062	0.0473756	0.99148	yes	down	0.162572	0.215298	0.159767	0.0539157	0.0410319	0.0722614	0.179212	0.0557363	ZC3H18-201	zinc finger CCCH domain-containing protein 18 isoform X1 [Sus scrofa]	XP_020949323.1
Chr06_20465710_20482544		6.86431	2.77911	5.81573e-06	0.00211564	yes	up	0.0232245	0.0416706	0.0217864	0.168487	0.198321	0.0433568	0.0288938	0.136721	#N/A	#N/A	#N/A
Chr06_20465710_20499271		9.63214	3.26786	0.0259796	0.730901	yes	up	0.015483	0	0	0.0404368	0.020516	0.0289045	0.005161	0.0299524	#N/A	#N/A	#N/A
Chr06_32614019_32620129	Pig.05306	12.3322	3.62436	0.0141025	0.510507	yes	up	0	0.0138902	0	0	0.0478706	0.0578091	0.00463007	0.0352266	ACADM-205	RecName: Full=Medium-chain specific acyl-CoA dehydrogenase, mitochondrial; Short=MCAD; Flags: PrecursorAAW30430.1 medium-chain acyl-coA dehydrogenase [Sus scrofa]	P41367.3
Chr06_34537471_34546764		3.83152	1.93792	0.0037287	0.237072	yes	up	0.030966	0.0763962	0.0145242	0.148268	0.109418	0.050583	0.0406288	0.102757	#N/A	#N/A	#N/A
Chr06_54582009_54601840	Pig.03599	27.5833	4.78572	0.0243526	0.713183	yes	up	0	0	0	0.0404368	0.0410319	0	0	0.0271562	TRAPPC8-201	trafficking protein particle complex subunit 8 isoform X1 [Sus scrofa]	XP_020951870.1
Chr06_54582009_54631349	Pig.03599	32.4786	5.02142	0.0477451	0.992307	yes	up	0	0	0	0.0539157	0	0.0216784	0	0.025198	TRAPPC8-201	trafficking protein particle complex subunit 8 isoform X1 [Sus scrofa]	XP_020951870.1
Chr06_63650554_63671201		4.82745	2.27126	0.0157282	0.549876	yes	up	0.015483	0.0416706	0.10167	0.397628	0.0752252	0.0216784	0.0529411	0.164844	#N/A	#N/A	#N/A
Chr06_63650554_63691247		6.8312	2.77214	0.0114839	0.47516	yes	up	0.0232245	0.0208353	0.0290485	0.229142	0.0547092	0.0361307	0.0243694	0.106661	#N/A	#N/A	#N/A
Chr06_66564283_66595285	Pig.03664	7.91453	2.9845	0.0314111	0.795784	yes	up	0	0	0.0217864	0.0876131	0.0273546	0	0.00726212	0.0383226	SMCHD1-201	structural maintenance of chromosomes flexible hinge domain-containing protein 1 isoform X1 [Sus scrofa]	XP_020951796.1
Chr06_71770746_71807159		23.8819	4.57784	0.00367549	0.236807	yes	up	0	0	0	0	0.0547092	0.0144523	0	0.0230538	#N/A	#N/A	#N/A
Chr06_71786235_71807159	Pig.03687	11.778	3.55802	0.0493543	1	yes	up	0	0	0	0.0134789	0.020516	0	0	0.0113316	ANKRD12-201	ankyrin repeat domain-containing protein 12 isoform X1 [Sus scrofa]	XP_020951722.1
Chr06_71786235_71818899	Pig.03687	49.276	5.62281	0.000306463	0.0425276	yes	up	0	0	0	0.0336973	0.0478706	0.0433568	0	0.0416416	ANKRD12-201	ankyrin repeat domain-containing protein 12 isoform X1 [Sus scrofa]	XP_020951722.1
Chr06_71794909_71807159	Pig.03687	3.45416	1.78833	0.0433171	0.93923	yes	up	0.030966	0.0486157	0.0363106	0.114571	0.109418	0.0433568	0.0386308	0.0891154	ANKRD12-201	ankyrin repeat domain-containing protein 12 isoform X1 [Sus scrofa]	XP_020951722.1
Chr06_71800142_71818899	Pig.03687	0.0544032	-4.20017	0.00193677	0.158815	yes	down	0.046449	0.0347255	0.0290485	0	0	0	0.036741	0	ANKRD12-201	ankyrin repeat domain-containing protein 12 isoform X1 [Sus scrofa]	XP_020951722.1
Chr06_79118478_79127999	Pig.03010	2.02975	1.0213	0.0251353	0.723764	yes	up	0.108381	0.32642	0.188815	0.134789	0.451351	0.245689	0.207872	0.277276	ZMYM4-201	zinc finger MYM-type protein 4 isoform X2 [Sus scrofa]	XP_020951559.1
Chr06_79153469_79156262	Pig.03010	12.5423	3.64873	2.94886e-10	5.31975e-07	yes	up	0.0541905	0.104177	0.0145242	0.694165	0.622317	0.173427	0.0576304	0.496637	ZMYM4-201	zinc finger MYM-type protein 4 isoform X2 [Sus scrofa]	XP_020951559.1
Chr06_83054379_83069199	Pig.03076	0.0732139	-3.77174	0.024607	0.717073	yes	down	0.030966	0	0.0508348	0	0	0	0.027267	0	PUM1-201	pumilio homolog 1 isoform X17 [Sus scrofa]	XP_020951410.1
Chr06_84760516_84766217	Pig.03089	7.06144	2.81996	0.00163401	0.13647	yes	up	0	0.0277804	0.0217864	0.12131	0.0478706	0.050583	0.0165223	0.0732546	EPB41-201	protein 4.1 isoform X1 [Sus scrofa]	XP_020951347.1
Chr06_86668446_86670657	Pig.03134	3.0552	1.61127	0.0350134	0.832984	yes	up	0.0387075	0.062506	0.0290485	0.0673947	0.157289	0.050583	0.0434206	0.0917555	ARID1A-201	AT-rich interactive domain-containing protein 1A isoform X1 [Sus scrofa]	XP_020951289.1
Chr06_89512529_89516131	Pig.03192	0.0674294	-3.89048	0.0112319	0.469037	yes	down	0.0387075	0.0208353	0.0290485	0	0	0	0.0295304	0	HNRNPR-201	heterogeneous nuclear ribonucleoprotein R isoform X2 [Heterocephalus glaber]	XP_020951171.1
Chr06_9307653_9324795	Pig.14732	0.0479372	-4.38271	0.00130352	0.126428	yes	down	0.046449	0.0208353	0.058097	0	0	0	0.0417938	0	OSBPL9-202	oxysterol-binding protein-related protein 9 isoform X1 [Sus scrofa]	XP_005665492.2
Chr06_95797547_95804911	Pig.08610	0.322635	-1.63202	0.0441196	0.954337	yes	down	0.061932	0.111122	0.0508348	0.0336973	0.0136773	0	0.0746295	0.0157915	SPEN-201	LOW QUALITY PROTEIN: msx2-interacting protein [Sus scrofa]	XP_020951052.1
Chr06_96042171_96051495	Pig.08606	0.0476136	-4.39248	0.00396434	0.24492	yes	down	0.0541905	0.0347255	0.0363106	0	0	0	0.0417422	0	DDI1-201	PREDICTED: protein DDI1 homolog 2 isoform X2 [Orcinus orca]	XP_012389449.1
Chr06_96138769_96140954	Pig.08604	0.165726	-2.59313	0.0207594	0.650173	yes	down	0.0541905	0.118067	0.0871455	0.0269579	0	0	0.0864676	0.00898595	DNAJC16-201	dnaJ homolog subfamily C member 16 isoform X1 [Sus scrofa]	XP_020951042.1
Chr06_98861647_98869027		5.11392	2.35443	0.0058303	0.313031	yes	up	0	0	0.0653591	0.0336973	0.0615479	0.101166	0.0217864	0.0654704	#N/A	#N/A	#N/A
Chr07_10942910_10950805	Pig.13812,MSTRG.19250	48.8963	5.61165	0.000681172	0.0777743	yes	up	0	0	0	0	0.116257	0.0289045	0	0.0483872	#N/A	#N/A	#N/A
Chr07_113801960_113803642	Pig.09320	0.419886	-1.25193	0.0418537	0.923032	yes	down	0.201279	0.34031	0.370368	0.101092	0.109418	0.0433568	0.303986	0.0846224	BICRAL-201	GLTSCR1-like protein [Sus scrofa]	XP_003356680.2
Chr07_114011462_114013898	MSTRG.21313,Pig.09323	0.0420298	-4.57244	0.0251953	0.723764	yes	down	0.030966	0.062506	0.0508348	0	0	0	0.0481023	0	#N/A	#N/A	#N/A
Chr07_120143483_120151102	Pig.13544	6.30546	2.6566	0.0481549	0.996319	yes	up	0	0.0138902	0.0217864	0.0673947	0.0478706	0.0289045	0.0118922	0.0480566	SRPK1-201	SRSF protein kinase 1 [Sus scrofa]	NP_001137585.1
Chr07_127317226_127327861	Pig.11473	29.359	4.87573	0.00661559	0.338816	yes	up	0	0	0	0	0	0.0578091	0	0.0192697	Tnxb	tenascin-X isoform X5 [Sus scrofa]	XP_020953995.1
Chr07_128486884_128504793		0.263251	-1.92549	0.0471092	0.99148	yes	down	0.0851565	0.0208353	0.0726212	0	0	0.0289045	0.0595377	0.00963485	#N/A	#N/A	#N/A
Chr07_133132933_133218836		0.0481994	-4.37484	0.0496431	1	yes	down	0.0387075	0.0277804	0.058097	0	0	0	0.0415283	0	#N/A	#N/A	#N/A
Chr07_20538732_20548703		0.47907	-1.06169	0.00313853	0.215284	yes	down	0.882531	0.604224	0.668115	0.336973	0.239353	0.108392	0.71829	0.228239	#N/A	#N/A	#N/A
Chr07_33686630_33731575		18.8084	4.2333	0.012194	0.485898	yes	up	0	0	0	0	0.0273546	0.0216784	0	0.0163443	#N/A	#N/A	#N/A
Chr07_48314816_48325572	Pig.08878	33.1535	5.05109	0.0181447	0.608419	yes	up	0	0	0	0	0.0889025	0.0144523	0	0.0344516	CEP128-201	centrosomal protein of 128 kDa isoform X4 [Sus scrofa]	XP_020955223.1
Chr07_54046395_54049908	Pig.19270	0.0813709	-3.61934	0.0160129	0.55767	yes	down	0.030966	0.0208353	0.0217864	0	0	0	0.0245292	0	AREL1-201	apoptosis-resistant E3 ubiquitin protein ligase 1 isoform X1 [Sus scrofa]	XP_003356794.1
Chr07_55478562_55481505	Pig.04355	20.6953	4.37123	0.047555	0.992307	yes	up	0	0	0	0.0134789	0.0273546	0.0144523	0	0.0184286	RBM25-201	RNA binding motif protein 25, isoform CRA_d [Homo sapiens]	XP_005666396.1
Chr07_55586218_55592298	Pig.04353	0.0480174	-4.3803	0.0085146	0.404219	yes	down	0.0851565	0	0.0363106	0	0	0	0.040489	0	ZFYVE1-201	zinc finger FYVE domain-containing protein 1 isoform X1 [Sus scrofa]	XP_001926196.3
Chr07_57467134_57478320	Pig.04346	16.4398	4.03912	0.0408173	0.911158	yes	up	0	0	0	0	0.0547092	0	0	0.0182364	PCNX1-201	pecanex-like protein 1 isoform X1 [Sus scrofa]	XP_020955078.1
Chr07_65935765_65967456	MSTRG.20331,Pig.04276	15.6733	3.97024	0.0273939	0.751042	yes	up	0	0	0	0.0134789	0	0.0216784	0	0.0117191	#N/A	#N/A	#N/A
Chr07_65935765_65977597	MSTRG.20331,Pig.04276	58.276	5.86483	7.51561e-06	0.00247861	yes	up	0	0	0	0.0202184	0.0547092	0.0722614	0	0.049063	#N/A	#N/A	#N/A
Chr07_65997087_65998341	MSTRG.20331,Pig.04276	2.38956	1.25674	0.0334186	0.810084	yes	up	0.0541905	0.062506	0.0435727	0.0471763	0.157289	0.0578091	0.0534231	0.0874248	#N/A	#N/A	#N/A
Chr07_78284745_78314204	MSTRG.20541	4092.06	11.9986	2.14466e-06	0.00105341	yes	up	0.015483	0	0.0145242	56.9013	32.3537	0.0361307	0.0100024	29.7637	0	0	XP_020954893.1
Chr07_78844713_78845999	Pig.09731	0.0674157	-3.89077	0.0304486	0.789417	yes	down	0.0387075	0.0277804	0.0217864	0	0	0	0.0294248	0	IRF9-203	interferon regulatory factor 9 [Sus scrofa]	XP_008707015.1
Chr07_85427777_85452842	Pig.08415	28.4335	4.82952	0.011913	0.483986	yes	up	0	0	0	0.0539157	0	0.0144523	0	0.0227893	STRN-201	striatin-3 isoform X1 [Sus scrofa]	XP_020955544.1
Chr07_85433213_85452842	Pig.08415	42.9216	5.42363	5.31759e-06	0.00211564	yes	up	0	0	0.0145242	0.0808736	0.191482	0.13007	0.00484141	0.134142	STRN-201	striatin-3 isoform X1 [Sus scrofa]	XP_020955544.1
Chr07_85446229_85452842	Pig.08415	2.43558	1.28426	0.0457724	0.971452	yes	up	0.046449	0.250024	0.116194	0.0943525	0.512899	0.115618	0.137556	0.240957	STRN-201	striatin-3 isoform X1 [Sus scrofa]	XP_020955544.1
Chr07_86387061_86413156		7.90975	2.98363	0.000627979	0.0727733	yes	up	0.015483	0.0763962	0.0363106	0.491981	0.177805	0.0144523	0.0427299	0.228079	#N/A	#N/A	#N/A
Chr07_88769017_88792416	Pig.08431	21.6792	4.43824	0.00603497	0.322103	yes	up	0	0	0	0.0269579	0.0136773	0.0144523	0	0.0183625	SNX6-202	sorting nexin-6 [Sus scrofa]	NP_001231145.1
Chr07_88781142_88792416	Pig.08431	18.4504	4.20558	0.026092	0.730901	yes	up	0	0	0	0	0.0136773	0.0289045	0	0.014194	SNX6-202	sorting nexin-6 [Sus scrofa]	NP_001231145.1
Chr07_97598783_97651052		0.0555856	-4.16914	0.00315049	0.215284	yes	down	0.0232245	0.0416706	0.0435727	0	0	0	0.036156	0	#N/A	#N/A	#N/A
Chr07_97789171_97799770	Pig.08775	5.31385	2.40976	0.0078485	0.382215	yes	up	0.030966	0.062506	0.0290485	0.0269579	0.191482	0.180653	0.0408401	0.133031	FBXO22-202	ubiquitin-conjugating enzyme E2 Q2 isoform X1 [Sus scrofa]	XP_020954668.1
Chr08_122959162_122991415		25.0988	4.64955	0.0109996	0.465805	yes	up	0	0	0	0.0269579	0	0.0289045	0	0.0186208	#N/A	#N/A	#N/A
Chr08_135827082_135836912		4.26104	2.0912	0.0206396	0.648672	yes	up	0.015483	0.0208353	0.0363106	0.0539157	0.136773	0.0289045	0.0242096	0.0731978	#N/A	#N/A	#N/A
Chr08_137907029_137913935	Pig.00539	0.0437175	-4.51565	0.00127029	0.125913	yes	down	0.0387075	0.062506	0.0363106	0	0	0	0.0458414	0	ENOPH1-202	enolase-phosphatase E1 [Sus scrofa]	NP_001230759.1
Chr08_138698753_138701503	Pig.00533	13.225	3.7252	0.0308945	0.793664	yes	up	0	0	0	0.0336973	0	0	0	0.0112324	RASGEF1B-201	ras-GEF domain-containing family member 1B isoform X2 [Sus scrofa]	XP_020955964.1
Chr08_1703929_1711045	Pig.20462	0.280027	-1.83636	0.00649454	0.336377	yes	down	0.278694	0.215298	0.37763	0	0.15045	0.0289045	0.290541	0.059785	TBC1D14	LOW QUALITY PROTEIN: TBC1 domain family member 14 [Sus scrofa]	XP_020956625.1
Chr08_19581115_19616905	Pig.04127	2.19284	1.1328	0.0266572	0.74135	yes	up	0.10064	0.0902864	0.0508348	0.0539157	0.157289	0.13007	0.0805869	0.113758	FIP1L1	PREDICTED: pre-mRNA 3'-end-processing factor FIP1 isoform X7 [Manis javanica]	XP_020956900.1
Chr08_49633206_49660217	Pig.05336	4.28975	2.10089	0.0477441	0.992307	yes	up	0	0.0208353	0	0.0134789	0.0341933	0.0144523	0.00694511	0.0207082	CPEB2-201	cytoplasmic polyadenylation element-binding protein 2 isoform X1 [Sus scrofa]	XP_020955979.1
Chr08_71418686_71512101		16.9476	4.08301	5.7787e-06	0.00211564	yes	up	0.030966	0	0.0217864	0.101092	0.246191	0.209558	0.0175841	0.185614	#N/A	#N/A	#N/A
Chr08_73010185_73015011	Pig.08348	0.434193	-1.20359	0.0185627	0.620132	yes	down	0.603837	0.493102	0.798833	0.222402	0.198321	0.115618	0.631924	0.17878	SDAD1-201	protein SDA1 homolog isoform X1 [Sus scrofa]	XP_003129136.1
Chr08_76919986_76940543	Pig.19598	32.8808	5.03917	0.0328747	0.806306	yes	up	0	0	0	0	0.0478706	0.0361307	0	0.0280004	TMEM131L-202	transmembrane protein 131-like [Sus scrofa]	XP_020957145.1
Chr08_84424521_84438446	Pig.01076	3.16608	1.6627	0.0390035	0.884591	yes	up	0.030966	0.0347255	0.0363106	0.0471763	0.0615479	0.0867136	0.0340007	0.0651459	SMAD1-201	mothers against decapentaplegic homolog 1 [Sus scrofa]	NP_999130.1
Chr08_89359872_89392735		0.44465	-1.16926	0.0174401	0.595279	yes	down	0.224504	0.423651	0.472038	0.161747	0.123096	0.0433568	0.373398	0.1094	#N/A	#N/A	#N/A
Chr08_89371697_89392735		0.484533	-1.04533	7.69415e-06	0.00247861	yes	down	2.70178	2.9864	3.45677	1.10527	1.38141	0.50583	3.04832	0.997503	#N/A	#N/A	#N/A
Chr08_98428798_98446659	Pig.01030	19.8073	4.30796	0.00376514	0.237494	yes	up	0	0	0	0	0.0410319	0.0144523	0	0.0184947	LARP1B-201	la-related protein 1B isoform X1 [Sus scrofa]	XP_013834346.2
Chr09_102928871_102935963	Pig.08203	5.07749	2.34412	0.000523698	0.0637314	yes	up	0.077415	0.0555608	0.0145242	0.114571	0.321417	0.0939398	0.0491667	0.176642	DDX10	probable ATP-dependent RNA helicase DDX10 [Sus scrofa]	XP_020918412.1
Chr09_109155145_109193076	Pig.11684	4.95523	2.30895	0.00140967	0.131085	yes	up	0.046449	0.0138902	0.0363106	0.0741341	0.0341933	0.158975	0.0322166	0.0891008	PICALM-207	phosphatidylinositol-binding clathrin assembly protein isoform X6 [Sus scrofa]	XP_020957732.1
Chr09_109163680_109193076	Pig.11684	4.12632	2.04485	2.52789e-05	0.00633378	yes	up	0.108381	0.250024	0.0435727	0.37741	0.533415	0.209558	0.133993	0.373461	PICALM-207	phosphatidylinositol-binding clathrin assembly protein isoform X6 [Sus scrofa]	XP_020957732.1
Chr09_109165747_109193076	Pig.11684	2.43248	1.28243	0.00285641	0.206256	yes	up	0.116123	0.236134	0.0508348	0.242621	0.266707	0.137297	0.134364	0.215542	PICALM-207	phosphatidylinositol-binding clathrin assembly protein isoform X6 [Sus scrofa]	XP_020957732.1
Chr09_117431858_117432524	Pig.08148	5.2519	2.39284	3.39462e-05	0.00785116	yes	up	0.077415	0.152792	0.0508348	0.0943525	0.56077	0.31795	0.0936807	0.324357	CEP57	centrosomal protein of 57 kDa isoform X1 [Sus scrofa]	XP_020918348.1
Chr09_126800519_126807052	Pig.12861	0.269724	-1.89045	0.0490454	1	yes	down	0.0696735	0.0833413	0.123456	0.0134789	0.020516	0.0144523	0.0921569	0.0161491	RNF169-201	E3 ubiquitin-protein ligase RNF169 [Sus scrofa]	XP_020918163.1
Chr09_131363257_131386887		0.325326	-1.62004	0.0333469	0.810084	yes	down	0.224504	0.284749	0.246912	0.0808736	0.0957411	0	0.252055	0.0588716	#N/A	#N/A	#N/A
Chr09_132363589_132363802	MSTRG.25786,Pig.20569	0.0468746	-4.41505	0.0319275	0.797745	yes	down	0.061932	0.0277804	0.0363106	0	0	0	0.0420077	0	#N/A	#N/A	#N/A
Chr09_133416931_133431162	Pig.10251	27.1427	4.76249	0.0385004	0.881405	yes	up	0	0	0	0	0.0547092	0.0216784	0	0.0254625	EMSY-205	BRCA2-interacting transcriptional repressor EMSY isoform X1 [Sus scrofa]	XP_013834604.1
Chr09_134961058_134964794	Pig.10235	32.5842	5.0261	0.00534499	0.297604	yes	up	0	0	0	0.0336973	0.0410319	0.0144523	0	0.0297272	RSF1-201	remodeling and spacing factor 1 [Sus scrofa]	ACJ53937.1
Chr09_140208927_140230748		7.58497	2.92314	0.0081214	0.389654	yes	up	0.0232245	0.0486157	0	0.229142	0.0957411	0.0361307	0.0239467	0.120338	#N/A	#N/A	#N/A
Chr09_16530586_16542844	Pig.04694	2.23017	1.15716	0.0224872	0.676117	yes	up	0.139347	0.194463	0.0435727	0.235881	0.198321	0.115618	0.125794	0.183273	CEP350	LOW QUALITY PROTEIN: centrosome-associated protein 350 [Sus scrofa]	XP_020919409.1
Chr09_20179178_20206602	Pig.04669	0.232991	-2.10166	0.00983417	0.4368	yes	down	0.0696735	0.180573	0.116194	0.0202184	0.020516	0.0144523	0.122147	0.0183955	COP1-203	E3 ubiquitin-protein ligase RFWD2 isoform X1 [Sus scrofa]	XP_020919333.1
Chr09_23271876_23286452	Pig.04645	5.84777	2.54789	0.000104683	0.0192702	yes	up	0	0.0555608	0.0217864	0.0943525	0.10258	0.0939398	0.0257824	0.0969574	SUCO-201	LOW QUALITY PROTEIN: SUN domain-containing ossification factor [Sus scrofa]	XP_003357586.3
Chr09_33100070_33138431	Pig.00296	21.431	4.42163	0.0412525	0.914802	yes	up	0	0	0	0	0.0478706	0.0144523	0	0.0207743	PUS7-201	pseudouridylate synthase 7 homolog isoform X1 [Sus scrofa]	XP_020958252.1
Chr09_33496203_33504556	Pig.00298	6.47192	2.69419	0.00432697	0.256771	yes	up	0.015483	0.0138902	0.0217864	0.0539157	0.0820638	0.0722614	0.0170532	0.0694136	KMT2E-201	histone-lysine N-methyltransferase 2E isoform X1 [Sus scrofa]	XP_013835277.2
Chr09_46149144_46149865	Pig.00347	37.3454	5.22286	0.000185012	0.031487	yes	up	0.015483	0	0	0.222402	0.123096	0.0361307	0.005161	0.12721	TRA2A-201	PREDICTED: transformer-2 protein homolog alpha isoform X3 [Hipposideros armiger]	NP_932770.2
Chr09_46149144_46155136	Pig.00347	79.0897	6.30542	0.00905101	0.421923	yes	up	0	0	0	0.0943525	0.0820638	0.0361307	0	0.070849	TRA2A-201	PREDICTED: transformer-2 protein homolog alpha isoform X3 [Hipposideros armiger]	NP_932770.2
Chr09_49973631_49975568		11.9041	3.57338	0.000399029	0.0514177	yes	up	0	0.0416706	0	0.168487	0.136773	0.0361307	0.0138902	0.113797	#N/A	#N/A	#N/A
Chr09_66539763_66565923	MSTRG.24574,Pig.00439	24.8814	4.63699	0.00136463	0.128218	yes	up	0	0.0138902	0	0.101092	0.0752252	0.050583	0.00463007	0.0756334	#N/A	#N/A	#N/A
Chr09_66541500_66565923	MSTRG.24574,Pig.00439	18.5371	4.21234	0.0178468	0.602211	yes	up	0	0.0138902	0	0.0606552	0.0889025	0.0289045	0.00463007	0.0594874	#N/A	#N/A	#N/A
Chr09_76456393_76457111	Pig.18477	0.0577731	-4.11346	0.0257869	0.730901	yes	down	0.0387075	0.0138902	0.0508348	0	0	0	0.0344775	0	GUCY1A2-201	guanylate cyclase soluble subunit alpha-2 [Sus scrofa]	XP_003130141.3
Chr09_90951665_90967965		0.0459235	-4.44462	0.000882732	0.0971005	yes	down	0.030966	0.0277804	0.0726212	0	0	0	0.0437892	0	#N/A	#N/A	#N/A
Chr09_93598621_93601350	Pig.12721	3.38471	1.75903	0.0334303	0.810084	yes	up	0.077415	0.0694511	0.0290485	0.107831	0.225676	0.0794875	0.0586382	0.137665	KMT2A	histone-lysine N-methyltransferase 2A isoform X1 [Sus scrofa]	XP_020918570.1
Chr09_93599512_93601350	Pig.12721	3.32421	1.73301	0.0132588	0.504174	yes	up	0.030966	0.0763962	0.0217864	0.12131	0.0889025	0.0650352	0.0430495	0.0917494	KMT2A	histone-lysine N-methyltransferase 2A isoform X1 [Sus scrofa]	XP_020918570.1
Chr09_97364282_97379446		0.0760334	-3.71722	0.012892	0.502651	yes	down	0.0232245	0.0555608	0	0	0	0	0.0262618	0	#N/A	#N/A	#N/A
Chr10_14523_14657		0.00759813	-7.04014	0.00576654	0.311462	yes	down	0.201279	0.333365	0.261436	0	0	0	0.26536	0	#N/A	#N/A	#N/A
Chr10_15356518_15357043		0.115166	-3.11822	0.00747916	0.372718	yes	down	0.0696735	0.0694511	0.0508348	0	0	0.0144523	0.0633198	0.00481742	#N/A	#N/A	#N/A
Chr10_15395333_15396840	Pig.10835	0.250137	-1.99921	0.00301987	0.214482	yes	down	0.30966	0.187518	0.4793	0.0269579	0.0615479	0.0650352	0.325493	0.0511803	DISP1-201	protein dispatched homolog 1 isoform X3 [Sus scrofa]	XP_020920007.1
Chr10_20961970_20996575	Pig.11163	0.0616635	-4.01944	0.0412776	0.914802	yes	down	0.046449	0.0277804	0.0217864	0	0	0	0.0320053	0	MARK1-201	serine/threonine-protein kinase MARK1 isoform X1 [Sus scrofa]	XP_020919987.1
Chr10_34281541_34341728		6.75968	2.75695	0.00224848	0.174839	yes	up	0	0.0347255	0.0145242	0.0336973	0.184644	0.0289045	0.0164166	0.0824152	#N/A	#N/A	#N/A
Chr10_5620193_5672558	MSTRG.26009,Pig.12503	41.6051	5.37869	0.00130262	0.126428	yes	up	0	0	0	0.0404368	0	0.050583	0	0.0303399	#N/A	#N/A	#N/A
Chr10_57648307_57658438	Pig.13793	0.0666318	-3.90765	0.0096594	0.4368	yes	down	0.046449	0.0138902	0.0290485	0	0	0	0.0297959	0	FAM171A1-201	protein FAM171A1 isoform X1 [Sus scrofa]	XP_003130784.4
Chr10_62136486_62138950	Pig.05023	0.244447	-2.03241	0.0123985	0.490503	yes	down	0.131606	0.0555608	0.181553	0	0.020516	0.0361307	0.122906	0.0188822	ZEB1-201	LOW QUALITY PROTEIN: zinc finger E-box-binding homeobox 1 [Sus scrofa]	XP_020919855.1
Chr10_71656721_71659985	MSTRG.27025,Pig.05070	0.375232	-1.41415	0.0234333	0.693012	yes	down	0.239987	0.3542	0.442989	0.0741341	0.184644	0.0216784	0.345725	0.0934854	#N/A	#N/A	#N/A
Chr10_71673526_71683181	MSTRG.27025,Pig.05070	2.62599	1.39286	0.0206198	0.648672	yes	up	0.0232245	0.0486157	0.0726212	0.0336973	0.116257	0.0939398	0.0481538	0.0812981	#N/A	#N/A	#N/A
Chr10_71673526_71700050	MSTRG.27025	3.60563	1.85025	0.000294008	0.0414368	yes	up	0.030966	0.0763962	0.0363106	0.141529	0.136773	0.0650352	0.0478909	0.114446	0	0	XP_020920352.1
Chr10_73318405_73340619		19.3783	4.27637	0.00863839	0.407949	yes	up	0	0.0138902	0	0.114571	0.0273546	0.0289045	0.00463007	0.0569434	#N/A	#N/A	#N/A
Chr10_75903041_75912874	MSTRG.27145,Pig.09943	16.4098	4.03649	0.011221	0.469037	yes	up	0	0	0	0	0.020516	0.0216784	0	0.0140648	#N/A	#N/A	#N/A
Chr10_78743191_78775151	Pig.09952	22.6104	4.49891	0.0129915	0.502651	yes	up	0	0	0	0	0.0273546	0.0289045	0	0.0187531	ERCC6L2	DNA excision repair protein ERCC-6-like 2 isoform X2 [Sus scrofa]	XP_020920253.1
Chr11_11019668_11027351	Pig.03524	2.65263	1.40742	0.00219086	0.174158	yes	up	0.061932	0.131957	0.13798	0.262839	0.259869	0.0722614	0.110623	0.198323	WASF3-201	wiskott-Aldrich syndrome protein family member 3 isoform X1 [Sus scrofa]	XP_020921162.1
Chr11_1765420_1770431	Pig.18473	0.0685615	-3.86646	0.0456539	0.971222	yes	down	0.0232245	0.0138902	0.0508348	0	0	0	0.0293165	0	ARHGEF7-201	rho guanine nucleotide exchange factor 7 isoform X9 [Sus scrofa]	XP_020921591.1
Chr11_22877583_22899081	Pig.03441,MSTRG.27747	0.175793	-2.50805	0.0322736	0.801949	yes	down	0.0387075	0.0347255	0.0508348	0	0	0.0144523	0.0414226	0.00481742	#N/A	#N/A	#N/A
Chr11_25906891_25912394		0.338898	-1.56108	0.0069855	0.352007	yes	down	0.526422	0.256969	0.363106	0.0134789	0.232514	0.0433568	0.382166	0.09645	#N/A	#N/A	#N/A
Chr11_28823280_28824215	Pig.07332	33.6699	5.07339	0.0299112	0.786685	yes	up	0	0	0	0.0471763	0	0.0289045	0	0.0253603	DGKH-201	LOW QUALITY PROTEIN: diacylglycerol kinase eta [Sus scrofa]	XP_020921283.1
Chr11_29171746_29198981		27.201	4.76559	0.000629303	0.0727733	yes	up	0	0	0	0.0336973	0.0136773	0.0216784	0	0.0230177	#N/A	#N/A	#N/A
Chr11_4643518_4687351		0.271175	-1.8827	0.00163238	0.13647	yes	down	0.131606	0.215298	0.210602	0.0404368	0.0273546	0.0289045	0.185835	0.032232	#N/A	#N/A	#N/A
Chr11_55174834_55186268	Pig.04507	6.92232	2.79126	2.41323e-06	0.00105341	yes	up	0.0232245	0.0416706	0.0290485	0.175226	0.143612	0.101166	0.0313145	0.140001	OBI1-201	RING finger protein 219 isoform X1 [Sus scrofa]	XP_003131086.3
Chr11_56037904_56048891	Pig.04511	0.153219	-2.70634	0.0306174	0.791314	yes	down	0.162572	0.159737	0.370368	0.0404368	0.0341933	0	0.230892	0.0248767	NDFIP2-202	NEDD4 family-interacting protein 2 [Sus scrofa]	XP_001926612.1
Chr11_7619806_7628690	Pig.03545	0.0490464	-4.34971	0.0202855	0.646557	yes	down	0.030966	0.0486157	0.0435727	0	0	0	0.0410515	0	IFT88-201	intraflagellar transport protein 88 homolog [Sus scrofa]	XP_020921093.1
Chr11_9854447_9854924	Pig.03531	0.374607	-1.41655	0.0013423	0.128218	yes	down	0.209021	0.284749	0.268698	0.0606552	0.10258	0.0289045	0.254156	0.0640465	MTMR6-201	PREDICTED: myotubularin-related protein 6 [Equus caballus]	XP_001491744.2
Chr12_11781912_11845650	MSTRG.28723	199.092	7.63729	0.000343848	0.0450875	yes	up	0	0.805632	0.0217864	58.1818	60.693	0.0144523	0.275806	39.6298	0	0	XP_020921875.1
Chr12_15327650_15366896	Pig.18677,MSTRG.28969	39.7718	5.31367	0.00338011	0.222545	yes	up	0	0	0	0.0471763	0.0478706	0.0144523	0	0.0364997	#N/A	#N/A	#N/A
Chr12_15327650_15371282	Pig.18677,MSTRG.28969	24.5947	4.62028	7.33613e-05	0.0143852	yes	up	0.015483	0	0	0.0876131	0.0683865	0.0722614	0.005161	0.076087	#N/A	#N/A	#N/A
Chr12_15349808_15371282	Pig.18677,MSTRG.28969	24.464	4.61259	0.0335576	0.810084	yes	up	0	0	0	0.0134789	0.0273546	0.0216784	0	0.0208373	#N/A	#N/A	#N/A
Chr12_18185030_18209858		2.3088	1.20715	0.00974334	0.4368	yes	up	0.162572	0.0972315	0.167029	0.363931	0.246191	0.0578091	0.142277	0.222644	#N/A	#N/A	#N/A
Chr12_21007643_21039228	Pig.11860	0.449093	-1.15491	0.0258634	0.730901	yes	down	0.46449	0.513938	0.501086	0.181966	0.143612	0.101166	0.493171	0.142248	SSH1-201	LOW QUALITY PROTEIN: protein phosphatase Slingshot homolog 2 [Sus scrofa]	XP_020923177.1
Chr12_23157554_23175557	Pig.11810	3.99038	1.99653	0.00615646	0.326654	yes	up	0.030966	0.0138902	0.0145242	0.0539157	0.0547092	0.0433568	0.0197935	0.0506606	NF1-201	LOW QUALITY PROTEIN: neurofibromin [Sus scrofa]	XP_017919758.1
Chr12_27032693_27034903	Pig.11236	0.0413983	-4.59428	0.001186	0.121565	yes	down	0.046449	0.0694511	0.0290485	0	0	0	0.0483162	0	TAF15-201	TATA-binding protein-associated factor 2N [Sus scrofa]	XP_022408278.1
Chr12_27312206_27315092	MSTRG.29412	512256	18.9665	7.57448e-05	0.0145366	yes	up	0	0	0	0	0	0.0289045	0	0.00963485	0	0	XP_020923050.1
Chr12_27312206_27323763	MSTRG.29412,Pig.11225	8.67444e-08	-23.4587	0.000344904	0.0450875	yes	down	2.56244	0	0	0	0	0	0.854146	0	#N/A	#N/A	#N/A
Chr12_27312206_27340379	MSTRG.29412	350730	18.42	1.67122e-05	0.00486271	yes	up	0	0	0	0.0134789	0.0136773	0	0	0.00905208	0	0	XP_020923050.1
Chr12_27312206_27348924	MSTRG.29412,Pig.11225	0.0146829	-6.08972	2.45252e-06	0.00105341	yes	down	1.06059	0.916754	1.40159	0.0202184	0.0136773	0	1.12631	0.0112986	#N/A	#N/A	#N/A
Chr12_27759712_27773665	Pig.11220,MSTRG.29425	3.62099	1.85639	0.0105958	0.46171	yes	up	0.0541905	0.0138902	0.10167	0.134789	0.225676	0.0650352	0.0565835	0.141833	#N/A	#N/A	#N/A
Chr12_30652472_30683029	Pig.11189	7.88	2.9782	0.00907462	0.421923	yes	up	0	0.0208353	0	0.0336973	0.0478706	0.0289045	0.00694511	0.0368241	RPS6KB1-203	ribosomal protein S6 kinase beta-1 isoform X1 [Sus scrofa]	XP_003131719.1
Chr12_34756374_34763751	Pig.13398	16.1729	4.0155	0.0106545	0.462036	yes	up	0	0	0	0	0	0.0361307	0	0.0120436	PCTP	phosphatidylcholine transfer protein isoform X1 [Sus scrofa]	XP_020922913.1
Chr12_40853263_40853381	MSTRG.29689	0.200036	-2.32167	0.0473743	0.99148	yes	down	0.092898	0.0347255	0.0290485	0.0202184	0	0	0.052224	0.00673947	0	0	OWK14899.1
Chr12_42901567_42902389	Pig.14461,MSTRG.29765	2.12579	1.088	0.0424211	0.928928	yes	up	0.0696735	0.138902	0.0798833	0.0471763	0.20516	0.144523	0.096153	0.132286	#N/A	#N/A	#N/A
Chr12_48641949_48684250		0.0122518	-6.35086	6.93553e-05	0.0142178	yes	down	0.162572	0.159737	0.167029	0	0	0	0.163113	0	#N/A	#N/A	#N/A
Chr12_52955532_52968212	Pig.08060	17.8082	4.15447	0.0409112	0.911158	yes	up	0	0	0	0.0269579	0	0.0144523	0	0.0138034	SMURF2-201	PREDICTED: E3 ubiquitin-protein ligase SMURF2 [Camelus ferus]	ELK12456.1
Chr12_53911643_53918541	Pig.08052	3.03132	1.59994	0.042533	0.928928	yes	up	0.0387075	0.0416706	0.0290485	0.0202184	0.116257	0.0794875	0.0364755	0.0719877	HELZ-201	probable helicase with zinc finger domain isoform X1 [Sus scrofa]	XP_020922402.1
Chr12_6060022_6064248	Pig.19289	4.27564	2.09614	0.000237351	0.0361329	yes	up	0.0851565	0.159737	0.0435727	0.0808736	0.465028	0.267367	0.0961556	0.27109	NCOR1	LOW QUALITY PROTEIN: nuclear receptor corepressor 1 [Sus scrofa]	XP_020921950.1
Chr12_6060022_6072546	Pig.19289	87.5286	6.45168	0.000252724	0.03737	yes	up	0	0	0	0.101092	0.0615479	0.0578091	0	0.073483	NCOR1	LOW QUALITY PROTEIN: nuclear receptor corepressor 1 [Sus scrofa]	XP_020921950.1
Chr12_6061278_6072546	Pig.19289	18.4626	4.20653	0.00311477	0.215284	yes	up	0	0.0208353	0	0.12805	0.0820638	0.0433568	0.00694511	0.0844902	NCOR1	LOW QUALITY PROTEIN: nuclear receptor corepressor 1 [Sus scrofa]	XP_020921950.1
Chr12_61007740_61009484	Pig.07996	0.0790893	-3.66037	0.04905	1	yes	down	0.046449	0.0277804	0	0	0	0	0.0247431	0	NAT9	N-acetyltransferase 9 isoform X1 [Sus scrofa]	XP_005668672.1
Chr12_6494980_6514405	Pig.19284	0.0130164	-6.26352	0.0122283	0.485898	yes	down	0.162572	0.173628	0.123456	0	0	0	0.153218	0	AKAP10-203	A-kinase anchor protein 10, mitochondrial [Sus scrofa]	NP_999303.1
Chr12_6535923_6536562		0.0919092	-3.44365	0.0150034	0.534902	yes	down	0.0696735	0.0486157	0.0944076	0	0.0136773	0	0.0708989	0.0045591	#N/A	#N/A	#N/A
Chr12_6541810_6554029		0.170208	-2.55463	0.0265247	0.740722	yes	down	0.0387075	0.0972315	0.0871455	0	0.0273546	0	0.0743615	0.0091182	#N/A	#N/A	#N/A
Chr13_10234909_10309163		4.16666	2.05889	0.00565685	0.307378	yes	up	0.030966	0	0.0363106	0.0539157	0.15045	0	0.0224255	0.068122	#N/A	#N/A	#N/A
Chr13_10239542_10246104	Pig.15846	17.7333	4.14839	0.0326728	0.806306	yes	up	0	0	0	0.0269579	0	0.0144523	0	0.0138034	RBM6-201	RNA-binding protein 6 isoform X1 [Sus scrofa]	XP_003483235.1
Chr13_10327454_10331181	Pig.15846	0.48824	-1.03434	0.0493051	1	yes	down	0.170313	0.173628	0.210602	0.0471763	0.109418	0.0289045	0.184847	0.0618331	RBM6-201	RNA-binding protein 6 isoform X1 [Sus scrofa]	XP_003483235.1
Chr13_110968727_110983363	Pig.15072	8.00291	3.00052	9.58554e-05	0.0180128	yes	up	0	0.062506	0	0.168487	0.164128	0.0216784	0.0208353	0.118098	DLG1-202	disks large homolog 1 isoform X1 [Sus scrofa]	XP_020925751.1
Chr13_110968727_110999222	Pig.15072	14.2843	3.83636	0.0220549	0.672079	yes	up	0	0	0	0	0.0136773	0.0216784	0	0.0117852	DLG1-202	disks large homolog 1 isoform X1 [Sus scrofa]	XP_020925751.1
Chr13_111639228_111640045	Pig.15059	28.2053	4.81789	0.0176168	0.597382	yes	up	0	0	0	0.0134789	0.0273546	0.0289045	0	0.023246	RNF168	E3 ubiquitin-protein ligase RNF168 isoform X1 [Sus scrofa]	XP_020925816.1
Chr13_113016848_113080574		23.3202	4.54351	0.0397937	0.892883	yes	up	0	0	0	0.0202184	0.0273546	0.0144523	0	0.0206751	#N/A	#N/A	#N/A
Chr13_119129735_119141267	MSTRG.32525,Pig.02129	0.0517888	-4.27121	0.00220111	0.174158	yes	down	0.030966	0.0416706	0.0435727	0	0	0	0.0387365	0	#N/A	#N/A	#N/A
Chr13_12552333_12554227	Pig.10932	0.320495	-1.64163	0.00294862	0.211084	yes	down	0.170313	0.263914	0.217864	0.0404368	0.0889025	0.0144523	0.217364	0.0479305	GNL3-201	guanine nucleotide-binding protein-like 3 isoform X2 [Sus scrofa]	XP_001928489.1
Chr13_126126025_126150599	Pig.02084	14.5593	3.86387	0.0209095	0.652609	yes	up	0	0	0	0.0202184	0	0.0144523	0	0.0115569	PHLDB2-201	LOW QUALITY PROTEIN: pleckstrin homology-like domain family B member 2 [Sus scrofa]	XP_020926050.1
Chr13_136751408_136764069	Pig.00872	25.1697	4.65362	0.0279214	0.751794	yes	up	0	0	0	0	0.0478706	0.0216784	0	0.023183	SENP7-201	sentrin-specific protease 7 isoform X1 [Sus scrofa]	XP_005657174.1
Chr13_145325406_145366306	Pig.00946	23.8438	4.57554	0.00158347	0.13647	yes	up	0	0	0	0.0134789	0.0273546	0.0216784	0	0.0208373	ARL13B-201	ADP-ribosylation factor-like protein 13B isoform X2 [Sus scrofa]	XP_020926391.1
Chr13_1453412_1456629	MSTRG.30515	3.13552	1.6487	0.0178927	0.602211	yes	up	0.0851565	0.0486157	0.145242	0.269579	0.164128	0.122844	0.0930049	0.185517	0	0	NP_001137400.1
Chr13_16259983_16262424	Pig.10910,MSTRG.30983	21.8058	4.44664	0.0268658	0.74292	yes	up	0	0	0	0.0404368	0.020516	0	0	0.0203176	#N/A	#N/A	#N/A
Chr13_169351797_169415970	Pig.15023	0.00603944	-7.37137	0.00123616	0.125282	yes	down	0.658028	0.29864	0	0	0	0	0.318889	0	APP-203	PREDICTED: amyloid beta A4 protein, partial [Galeopterus variegatus]	NP_999537.1
Chr13_179900839_179909050	Pig.13973	4.86138	2.28137	0.0350925	0.832984	yes	up	0.0387075	0.0486157	0.0217864	0.175226	0.10258	0.0650352	0.0363699	0.11428	MORC3-203	MORC family CW-type zinc finger protein 3 isoform X1 [Sus scrofa]	XP_003132812.1
Chr13_179900839_179911669	Pig.13973	39.4809	5.30308	0.0487877	1	yes	up	0	0	0	0.0269579	0.0615479	0.0216784	0	0.036728	MORC3-203	MORC family CW-type zinc finger protein 3 isoform X1 [Sus scrofa]	XP_003132812.1
Chr13_180594582_180621458		12.0234	3.58777	0.00644406	0.335985	yes	up	0	0.0208353	0	0.0808736	0.0820638	0.0144523	0.00694511	0.0591299	#N/A	#N/A	#N/A
Chr13_180597519_180621458		5.06155	2.33958	5.86374e-06	0.00211564	yes	up	0.0541905	0.111122	0.0145242	0.262839	0.232514	0.108392	0.0599455	0.201248	#N/A	#N/A	#N/A
Chr13_181182501_181207763		2.82641	1.49897	0.00636467	0.333775	yes	up	0.046449	0.0972315	0.0363106	0.0876131	0.129934	0.108392	0.059997	0.108646	#N/A	#N/A	#N/A
Chr13_49534611_49537459		0.225611	-2.14809	0.0272551	0.749514	yes	down	0.092898	0.159737	0.10167	0.0336973	0	0.0144523	0.118102	0.0160499	#N/A	#N/A	#N/A
Chr13_53391484_53428936	Pig.06070	6.37074	2.67146	3.91985e-10	5.89284e-07	yes	up	0.077415	0.187518	0.123456	0.741341	0.71122	0.22401	0.129463	0.558857	CEP63-201	centrosomal protein of 63 kDa isoform X1 [Sus scrofa]	XP_005669913.1
Chr13_55034018_55067505	Pig.06075	0.315566	-1.66399	0.00403035	0.245633	yes	down	0.30966	0.423651	0.334058	0.0471763	0.164128	0.0289045	0.35579	0.0800695	PCCB-205	propionyl-CoA carboxylase beta chain, mitochondrial precursor [Sus scrofa]	NP_999066.1
Chr13_57321321_57326544		12.2837	3.61867	0.00159095	0.13647	yes	up	0	0.0208353	0	0.0404368	0.0683865	0.0578091	0.00694511	0.0555441	#N/A	#N/A	#N/A
Chr13_75886415_75969576		7.76206	2.95644	0.00154412	0.13647	yes	up	0	0.0277804	0.0145242	0.0269579	0.0820638	0.0939398	0.0141016	0.0676538	#N/A	#N/A	#N/A
Chr13_86632258_86638860	Pig.11305	17.8303	4.15626	0.00331166	0.219641	yes	up	0	0.0138902	0	0.107831	0.020516	0.0289045	0.00463007	0.0524173	SEC62-201	translocation protein SEC62 [Sus scrofa]	XP_006764151.1
Chr13_86791164_86815919	Pig.11303	2.07444	1.05272	0.0316343	0.795784	yes	up	0.147089	0.104177	0.0944076	0.215663	0.123096	0.115618	0.115224	0.151459	PHC3-201	polyhomeotic-like protein 3 isoform X1 [Sus scrofa]	XP_020925436.1
Chr13_86836296_86842481	Pig.11303	0.147617	-2.76007	3.21967e-08	3.15561e-05	yes	down	4.16493	3.19475	2.04066	0.208923	0.649672	0.151749	3.13344	0.336781	PHC3-201	polyhomeotic-like protein 3 isoform X1 [Sus scrofa]	XP_020925436.1
Chr13_9451851_9452894	Pig.15877	2.55238	1.35185	0.0382057	0.87912	yes	up	0.0541905	0.222243	0.0726212	0.107831	0.348771	0.144523	0.116352	0.200375	QRICH1-203	glutamine-rich protein 1 [Sus scrofa]	XP_005669589.1
Chr13_98873441_98889700	Pig.06482	18.7658	4.23003	1.15334e-06	0.000611949	yes	up	0.0232245	0.0416706	0	0.37741	0.417158	0.0722614	0.0216317	0.288943	MCCC1-201	DCN1-like protein 1 isoform 1 [Homo sapiens]	NP_065691.2
Chr13_98885382_98889700	Pig.06482	8.71822	3.12403	2.24731e-09	2.89582e-06	yes	up	0.046449	0.0694511	0.0726212	0.49872	0.499222	0.13007	0.0628404	0.376004	MCCC1-201	DCN1-like protein 1 isoform 1 [Homo sapiens]	NP_065691.2
Chr14_101274591_101287518	Pig.01977	3.13662	1.64921	0.0137421	0.507804	yes	up	0.046449	0.0763962	0.0290485	0.161747	0.123096	0.0361307	0.0506312	0.106991	BTAF1-202	TATA-binding protein-associated factor 172 isoform X1 [Sus scrofa]	XP_003359339.2
Chr14_101276771_101287518	Pig.01977	2.3353	1.22361	0.00830335	0.396276	yes	up	0.0696735	0.0972315	0.0726212	0.107831	0.198321	0.0722614	0.0798421	0.126138	BTAF1-202	TATA-binding protein-associated factor 172 isoform X1 [Sus scrofa]	XP_003359339.2
Chr14_101508833_101519659	Pig.01976	38.2486	5.25734	0.00975659	0.4368	yes	up	0	0	0	0.0539157	0.020516	0.0216784	0	0.0320367	CPEB3-201	cytoplasmic polyadenylation element-binding protein 3 isoform X1 [Sus scrofa]	XP_020929151.1
Chr14_101787913_101794200	Pig.01974	0.430405	-1.21623	0.0148814	0.532661	yes	down	0.441266	0.368091	0.573708	0.134789	0.218837	0.0578091	0.461021	0.137145	IDE-202	insulin-degrading enzyme isoform X1 [Sus scrofa]	XP_001925416.3
Chr14_113362657_113380470		2.62559	1.39264	0.00331134	0.219641	yes	up	0.139347	0.0902864	0.108932	0.370671	0.109418	0.0867136	0.112855	0.188934	#N/A	#N/A	#N/A
Chr14_119577556_119578500	MSTRG.35758	20.0315	4.3242	0.0310602	0.793664	yes	up	0	0	0	0.0202184	0.0410319	0	0	0.0204168	0	0	NP_001244517.1
Chr14_119577556_119593281	MSTRG.35758	20.0578	4.32609	0.00533249	0.297604	yes	up	0	0.0138902	0	0.0943525	0.116257	0	0.00463007	0.0702032	0	0	NP_001244517.1
Chr14_20015252_20015712	Pig.10671,MSTRG.33945	0.163042	-2.61668	2.38637e-05	0.00633089	yes	down	0.688994	0.513938	0.573708	0.0539157	0.109418	0.0361307	0.592213	0.0664883	#N/A	#N/A	#N/A
Chr14_24404076_24417413	Pig.15749	22.7491	4.50773	0.0104515	0.457635	yes	up	0	0	0	0.0202184	0.0136773	0.0216784	0	0.0185247	ARID4B-201	AT-rich interactive domain-containing protein 4B isoform X1 [Sus scrofa]	XP_020930058.1
Chr14_34525395_34536598	Pig.07780	0.04179	-4.5807	0.0363074	0.848427	yes	down	0	0.0902864	0.058097	0	0	0	0.0494611	0	AUH-202	methylglutaconyl-CoA hydratase, mitochondrial isoform X2 [Sus scrofa]	XP_013845695.1
Chr14_41912046_41931580	Pig.07715	0.280662	-1.83309	0.000198255	0.0327721	yes	down	0.332885	0.388926	0.225126	0.0808736	0.0752252	0.0216784	0.315645	0.0592591	KCTD9-201	BTB/POZ domain-containing protein KCTD9 [Sus scrofa]	XP_003132863.3
Chr14_41930481_41931580	Pig.07715	0.36443	-1.45628	1.08674e-06	0.000611949	yes	down	0.990912	1.2015	1.13289	0.222402	0.451351	0.151749	1.10844	0.275167	KCTD9-201	BTB/POZ domain-containing protein KCTD9 [Sus scrofa]	XP_003132863.3
Chr14_41930481_41938885	Pig.07715	0.367602	-1.44378	0.00777471	0.38113	yes	down	0.371592	0.402816	0.297747	0.114571	0.0820638	0.0578091	0.357385	0.0848146	KCTD9-201	BTB/POZ domain-containing protein KCTD9 [Sus scrofa]	XP_003132863.3
Chr14_63478768_63485068	Pig.07175,MSTRG.34695	0.426304	-1.23004	0.00792396	0.382215	yes	down	0.363851	0.576444	0.610018	0.222402	0.143612	0.0650352	0.516771	0.143683	#N/A	#N/A	#N/A
Chr14_7769451_7769958	Pig.05797	0.461772	-1.11475	0.0137929	0.507804	yes	down	0.263211	0.201408	0.334058	0.0539157	0.136773	0.0578091	0.266226	0.0828326	TTC28-201	LOW QUALITY PROTEIN: tetratricopeptide repeat protein 28 [Sus scrofa]	XP_020929710.1
Chr14_83277934_83281237		16.2018	4.01808	0.0134814	0.504174	yes	up	0	0	0	0.0134789	0.0341933	0	0	0.0158907	#N/A	#N/A	#N/A
Chr14_85833418_85836812	Pig.19868	6.49918	2.70026	0.0047187	0.269384	yes	up	0	0.0486157	0	0.0606552	0.136773	0.0289045	0.0162052	0.0754443	WAPL-201	wings apart-like protein homolog isoform X1 [Sus scrofa]	XP_013845907.2
Chr14_90028374_90034475	Pig.02027	0.409943	-1.28651	0.0152955	0.539089	yes	down	1.78055	2.2016	2.67972	0.653728	1.10102	0.202332	2.22062	0.652361	UBE2D1-203	NR:NA	NP_003329.1
Chr14_90124579_90137727	Pig.02025	0.0436454	-4.51803	0.00149833	0.135149	yes	down	0.0387075	0.0555608	0.0435727	0	0	0	0.045947	0	IPMK-201	inositol polyphosphate multikinase isoform X2 [Sus scrofa]	XP_020928881.1
Chr14_97709841_97735566	Pig.02006	5.08008	2.34485	0.00766629	0.377869	yes	up	0.092898	0.152792	0.0653591	0.283058	0.471867	0.274593	0.103683	0.343173	PTEN	PREDICTED: phosphatidylinositol 3,4,5-trisphosphate 3-phosphatase and dual-specificity protein phosphatase PTEN [Ailuropoda melanoleuca]	NP_001003192.1
Chr15_102439703_102460666	Pig.00062	24.0663	4.58894	0.0125138	0.4929	yes	up	0	0	0	0.0336973	0	0.0216784	0	0.0184586	ANKRD44-201	serine/threonine-protein phosphatase 6 regulatory ankyrin repeat subunit B isoform X2 [Sus scrofa]	XP_020931892.1
Chr15_106434327_106437979	Pig.00029	0.104078	-3.26427	0.0481654	0.996319	yes	down	0.015483	0.0277804	0.0145242	0	0	0	0.0192626	0	CASP10-201	caspase-10 isoform X1 [Sus scrofa]	XP_020930185.1
Chr15_107834252_107838768	Pig.00014	0.0886911	-3.49507	0.0153805	0.539814	yes	down	0.046449	0.0208353	0	0	0	0	0.0224281	0	FAM117B-201	protein FAM117B isoform X1 [Sus scrofa]	XP_003133638.2
Chr15_107979484_108030953		87.0598	6.44393	7.47241e-08	5.18471e-05	yes	up	0	0.0138902	0	0.444805	0.307739	0.0939398	0.00463007	0.282161	#N/A	#N/A	#N/A
Chr15_108009353_108030953		8.28838	3.05109	0.00211312	0.171715	yes	up	0.0387075	0	0	0.141529	0.0547092	0.0144523	0.0129025	0.0702301	#N/A	#N/A	#N/A
Chr15_108518521_108519927	Pig.00007	0.0589423	-4.08455	0.0482696	0.996319	yes	down	0.030966	0.0347255	0.0363106	0	0	0	0.0340007	0	RAPH1	LOW QUALITY PROTEIN: ras-associated and pleckstrin homology domains-containing protein 1 [Sus scrofa]	XP_020930982.1
Chr15_114471451_114560459		5.24318	2.39044	4.95085e-07	0.000318976	yes	up	0.108381	0.173628	0.0653591	0.572855	0.335094	0.252915	0.115789	0.386954	#N/A	#N/A	#N/A
Chr15_114503744_114560459	MSTRG.37316	6.11303	2.61189	6.6827e-08	5.02317e-05	yes	up	0.147089	0.29864	0.0798833	1.18615	0.677027	0.267367	0.175204	0.71018	0	0	XP_005672211.2
Chr15_114533496_114560459	MSTRG.37316	7.91376	2.98436	2.2608e-14	1.01962e-10	yes	up	0.332885	0.722291	0.152505	2.89123	2.96114	0.758744	0.40256	2.2037	0	0	XP_005672211.2
Chr15_114559343_114560459	MSTRG.37316	2.41419	1.27154	0.00981969	0.4368	yes	up	0.270953	0.479212	0.0871455	0.451544	0.670188	0.252915	0.279103	0.458216	0	0	XP_005672211.2
Chr15_133653915_133657150	Pig.08723	11.2982	3.49803	0.029707	0.785797	yes	up	0	0	0.0145242	0.0404368	0.020516	0.0361307	0.00484141	0.0323611	PSMD1-201	26S proteasome non-ATPase regulatory subunit 1 [Sus scrofa]	XP_001925937.3
Chr15_139705972_139714817	Pig.16069	0.244776	-2.03047	0.0376034	0.869699	yes	down	0.108381	0.0555608	0	0.0134789	0.0136773	0	0.0546473	0.00905208	TRAF3IP1-201	TRAF3-interacting protein 1 [Sus scrofa]	XP_020930617.1
Chr15_213251_217025	Pig.04211	0.0738407	-3.75944	0.0329058	0.806306	yes	down	0.0387075	0.0416706	0	0	0	0	0.0267927	0	STAM2-201	signal transducing adapter molecule 2 isoform X1 [Sus scrofa]	XP_013852782.1
Chr15_25537906_25552485		0.0510308	-4.29249	0.0066486	0.338816	yes	down	0.0387075	0.0208353	0.058097	0	0	0	0.0392133	0	#N/A	#N/A	#N/A
Chr15_3699761_3737333	Pig.04234	19.1624	4.26021	0.019547	0.634224	yes	up	0	0	0	0.0202184	0.0136773	0.0144523	0	0.016116	MBD5-201	methyl-CpG-binding domain protein 5 isoform X1 [Sus scrofa]	XP_020931757.1
Chr15_49079022_49080493	Pig.02682,MSTRG.36454	0.296571	-1.75355	0.0276986	0.751794	yes	down	0.247728	0.180573	0.145242	0.0269579	0.0478706	0.0361307	0.191181	0.0369864	#N/A	#N/A	#N/A
Chr15_55576898_55590845	Pig.02646	0.206161	-2.27816	0.0267116	0.74135	yes	down	0.0541905	0.0902864	0.116194	0.0336973	0	0	0.0868903	0.0112324	GSR-201	glutathione reductase, mitochondrial [Sus scrofa]	XP_003483683.2
Chr15_55579929_55590845	Pig.02646	0.0570845	-4.13076	0.0125798	0.493345	yes	down	0	0.0277804	0.0798833	0	0	0	0.0358879	0	GSR-201	glutathione reductase, mitochondrial [Sus scrofa]	XP_003483683.2
Chr15_55584849_55590845	Pig.02646	0.114604	-3.12527	0.0174888	0.595279	yes	down	0.046449	0.104177	0.0363106	0.0134789	0	0	0.0623121	0.00449298	GSR-201	glutathione reductase, mitochondrial [Sus scrofa]	XP_003483683.2
Chr15_61738719_61744682	Pig.00267	34.9876	5.12877	0.00322928	0.219008	yes	up	0	0	0	0.0269579	0.020516	0.0361307	0	0.0278682	PRPF40A-201	pre-mRNA-processing factor 40 homolog A isoform X5 [Sus scrofa]	XP_013839583.2
Chr15_61746768_61755658	Pig.00267	19.138	4.25837	6.25626e-08	5.02317e-05	yes	up	0.030966	0.0208353	0	0.222402	0.300901	0.137297	0.0172671	0.2202	PRPF40A-201	pre-mRNA-processing factor 40 homolog A isoform X5 [Sus scrofa]	XP_013839583.2
Chr15_61748345_61755658	Pig.00267	2.76632	1.46797	2.49267e-05	0.00633378	yes	up	0.449007	1.00704	0.152505	1.04462	1.38141	0.563639	0.536184	0.996555	PRPF40A-201	pre-mRNA-processing factor 40 homolog A isoform X5 [Sus scrofa]	XP_013839583.2
Chr15_67531340_67539348	Pig.00245	0.10965	-3.18902	0.0246444	0.717073	yes	down	0.077415	0.0486157	0.0508348	0	0.0136773	0	0.0589552	0.0045591	WDSUB1-201	WD repeat, SAM and U-box domain-containing protein 1 isoform X1 [Sus scrofa]	XP_020930441.1
Chr15_67621405_67628331	Pig.00244	3.39206	1.76216	0.000896828	0.0974625	yes	up	0	0.0972315	0.0435727	0.0943525	0.123096	0.0939398	0.0469347	0.103796	BAZ2B-201	PREDICTED: bromodomain adjacent to zinc finger domain protein 2B isoform X4 [Ceratotherium simum simum]	XP_020930417.1
Chr15_73782954_73813056	Pig.00214	34.8523	5.12318	0.00760139	0.376728	yes	up	0	0	0	0.0539157	0.0478706	0	0	0.0339288	TTC21B-201	tetratricopeptide repeat protein 21B isoform X1 [Sus scrofa]	XP_020930449.1
Chr15_78573219_78637426	Pig.00183	48.8841	5.61129	2.2762e-05	0.00633089	yes	up	0	0	0	0.0606552	0.0273546	0.0361307	0	0.0413802	TLK1-201	serine/threonine-protein kinase tousled-like 1 isoform X1 [Sus scrofa]	XP_001927925.1
Chr15_85740264_85743393	MSTRG.36928	15.6662	3.96958	0.00745011	0.372718	yes	up	0.046449	0.0486157	0.0290485	0.0134789	0.198321	0.773197	0.0413711	0.328332	0	0	XP_020931560.1
Chr15_85752835_85764319	Pig.00129,MSTRG.36928	3.04553	1.60669	0.0140983	0.510507	yes	up	0.882531	1.90296	2.23673	4.22564	6.68136	0.44802	1.67407	3.78501	#N/A	#N/A	#N/A
Chr15_85752835_85764659	Pig.00129,MSTRG.36928	3.50384	1.80894	0.00652616	0.336377	yes	up	0.061932	0.201408	0.159767	0.370671	0.362449	0.216784	0.141036	0.316634	#N/A	#N/A	#N/A
Chr15_85758890_85759847	Pig.00129,MSTRG.36928	9.09351	3.18484	0.0202006	0.646132	yes	up	0.0541905	0.0833413	0.0363106	0.0673947	0.218837	0.556413	0.0579475	0.280881	#N/A	#N/A	#N/A
Chr15_85761324_85761662	Pig.00129,MSTRG.36928	0.00288986	-8.43479	0.0498752	1	yes	down	4.81521	6.64647	4.89467	0	0	0.0216784	5.45212	0.00722614	#N/A	#N/A	#N/A
Chr15_85772597_85773161	Pig.00129,MSTRG.36928	6.752	2.75531	1.33606e-05	0.00401709	yes	up	0.178055	0.270859	0.23965	0.485242	0.96425	1.26457	0.229521	0.904688	#N/A	#N/A	#N/A
Chr15_89598142_89609041	Pig.00116	21.1432	4.40212	0.0357465	0.839671	yes	up	0	0	0	0.0336973	0.0273546	0	0	0.0203506	DNAJC10-201	dnaJ homolog subfamily C member 10 [Sus scrofa]	XP_020931971.1
Chr15_95435029_95458046	Pig.00097	55.1124	5.7843	0.0355305	0.838966	yes	up	0	0	0	0.0471763	0.0615479	0.0361307	0	0.0482849	WDR75-201	WD repeat-containing protein 75 isoform X1 [Sus scrofa]	XP_020931739.1
Chr16_28892706_28913536		22.5499	4.49505	0.0275731	0.751794	yes	up	0	0	0	0	0.0136773	0.0361307	0	0.0166027	#N/A	#N/A	#N/A
Chr16_35775308_35787304	Pig.01140	6.20743	2.634	0.0217185	0.668205	yes	up	0.015483	0.0416706	0	0.0876131	0.0820638	0.0578091	0.0190512	0.0758287	ERBIN-201	erbin isoform X1 [Sus scrofa]	XP_020932447.1
Chr16_35783210_35787304	Pig.01140	20.799	4.37844	0.00162597	0.13647	yes	up	0	0.0138902	0	0.0673947	0.0341933	0.0722614	0.00463007	0.0579498	ERBIN-201	erbin isoform X1 [Sus scrofa]	XP_020932447.1
Chr16_35794581_35816115	Pig.01140	5.02752	2.32985	0.000208408	0.0335685	yes	up	0.0541905	0.062506	0	0.155008	0.0820638	0.122844	0.0388988	0.119972	ERBIN-201	erbin isoform X1 [Sus scrofa]	XP_020932447.1
Chr16_43972316_43991098	Pig.01172	34.4303	5.10561	0.00415832	0.248502	yes	up	0	0	0	0.0134789	0.0615479	0.0216784	0	0.0322351	GPBP1-202	vasculin isoform X1 [Sus scrofa]	XP_005672522.1
Chr16_43972316_43999957		48.6815	5.6053	0.00415143	0.248502	yes	up	0	0	0	0.0202184	0.10258	0.0216784	0	0.0481589	#N/A	#N/A	#N/A
Chr16_56515608_56558089	Pig.01261	6.92795	2.79243	3.75853e-05	0.00847548	yes	up	0.046449	0.0416706	0	0.12805	0.170966	0.101166	0.0293732	0.133394	LIFR-205	PREDICTED: leukemia inhibitory factor receptor [Lipotes vexillifer]	XP_007192247.1
Chr16_56548071_56558089	Pig.01261	13.7328	3.77955	0.0483845	0.996411	yes	up	0	0.0347255	0	0.12805	0.0547092	0.0939398	0.0115752	0.0922329	LIFR-205	PREDICTED: leukemia inhibitory factor receptor [Lipotes vexillifer]	XP_007192247.1
Chr16_57321264_57327791		0.322048	-1.63465	0.0485196	0.996918	yes	down	0.092898	0.138902	0.0798833	0.0404368	0.0273546	0	0.103894	0.0225971	#N/A	#N/A	#N/A
Chr16_60541346_60541707	MSTRG.38732	0.0857188	-3.54425	0.00230649	0.177817	yes	down	0.10064	0.0486157	0.0871455	0	0.0136773	0	0.0788002	0.0045591	0	0	XP_020932639.1
Chr16_61812200_61855194	Pig.06638	27.5815	4.78563	0.00144698	0.133181	yes	up	0	0	0	0.0202184	0.0410319	0.0144523	0	0.0252342	ZFR-201	zinc finger RNA-binding protein isoform X2 [Sus scrofa]	XP_020932637.1
Chr16_6840714_6840849		0.361098	-1.46954	0.0292615	0.77858	yes	down	0.433524	0.395871	0.682639	0.229142	0.0547092	0.0578091	0.504011	0.113887	#N/A	#N/A	#N/A
Chr16_7578884_7588861		0.0619101	-4.01368	0.0314478	0.795784	yes	down	0.046449	0.0347255	0.0145242	0	0	0	0.0318996	0	#N/A	#N/A	#N/A
Chr17_26654627_26669224	Pig.09535	16.392	4.03492	0.0198451	0.641586	yes	up	0	0	0	0.0134789	0.0136773	0.0144523	0	0.0138695	XRN2-201	LOW QUALITY PROTEIN: 5'-3' exoribonuclease 2 [Sus scrofa]	XP_004754180.1
Chr17_36068445_36101106		0.291163	-1.7801	0.0303922	0.789417	yes	down	0.15483	0.125012	0.116194	0.0202184	0.0341933	0.0216784	0.132012	0.0253634	#N/A	#N/A	#N/A
Chr17_36957879_36963159		4.19527	2.06876	0.00125475	0.125754	yes	up	0.0541905	0.0486157	0.0363106	0.0943525	0.143612	0.13007	0.0463723	0.122678	#N/A	#N/A	#N/A
Chr17_4449441_4457652	MSTRG.38895	14.1649	3.82425	0.0192187	0.633135	yes	up	0.0232245	0	0	0.114571	0.109418	0.0144523	0.0077415	0.0794805	0	0	XP_020933654.1
Chr17_46335644_46349120		4.23703	2.08305	0.0424354	0.928928	yes	up	0.046449	0.0347255	0.0217864	0.0741341	0.225676	0.0289045	0.0343203	0.109571	#N/A	#N/A	#N/A
Chr17_47415651_47416132	Pig.14975	0.291631	-1.77779	0.031551	0.795784	yes	down	0.030966	0.125012	0.0653591	0	0.020516	0.0216784	0.073779	0.0140648	ZMYND8-204	LOW QUALITY PROTEIN: protein kinase C-binding protein 1 [Sus scrofa]	XP_020933698.1
Chr17_7571166_7574449		4.12585	2.04469	0.0368805	0.859592	yes	up	0.0387075	0.0347255	0	0.0404368	0.0410319	0.0939398	0.0244777	0.0584695	#N/A	#N/A	#N/A
Chr18_10856198_10865472	Pig.17900	52.1179	5.70371	0.000268049	0.0389968	yes	up	0	0	0	0.0134789	0.0341933	0.0722614	0	0.0399779	UBN2-201	ubinuclein-2 isoform X1 [Sus scrofa]	XP_003360164.3
Chr18_17987495_18042263	Pig.01297	15.5013	3.95432	0.0227403	0.679197	yes	up	0	0	0	0.0134789	0	0.0216784	0	0.0117191	MKLN1-202	PREDICTED: muskelin isoform X3 [Ovis aries]	XP_004008122.1
Chr18_2812373_2825012	Pig.15536	2.05456	1.03883	0.0109381	0.465805	yes	up	0.061932	0.166683	0.159767	0.229142	0.211998	0.0867136	0.12946	0.175951	Rbm33	LOW QUALITY PROTEIN: RNA-binding protein 33 [Sus scrofa]	XP_020934696.1
Chr18_45570355_45584742	Pig.07094,MSTRG.40802	14.9677	3.90378	0.0416386	0.92054	yes	up	0	0	0	0.0202184	0	0.0144523	0	0.0115569	#N/A	#N/A	#N/A
Chr18_45729590_45754366	Pig.07095	0.241719	-2.0486	0.0134099	0.504174	yes	down	0.0232245	0.062506	0.0871455	0	0.0136773	0.0144523	0.0576253	0.00937653	HIBADH-202	3-hydroxyisobutyrate dehydrogenase, mitochondrial [Sus scrofa]	XP_020934876.1
Chr18_53610429_53620130	Pig.15553	2.14926	1.10384	0.0390319	0.884591	yes	up	0.162572	0.152792	0.0871455	0.155008	0.300901	0.13007	0.13417	0.195326	GLI3-201	transcriptional activator GLI3 isoform X2 [Sus scrofa]	XP_020934602.1
Chr18_55221402_55264445	Pig.17674	0.148221	-2.75418	0.00047863	0.0591403	yes	down	0.116123	0.250024	0.290485	0.0202184	0.0478706	0	0.218877	0.0226963	SUGCT-201	succinate--hydroxymethylglutarate CoA-transferase [Sus scrofa]	XP_020934311.1
Chr18_55254219_55264445	Pig.17674	0.44049	-1.18282	0.00546019	0.302153	yes	down	0.805116	2.15298	2.62163	0.303276	1.16941	0.274593	1.85991	0.582426	SUGCT-201	succinate--hydroxymethylglutarate CoA-transferase [Sus scrofa]	XP_020934311.1
Chr18_55330254_55397915	Pig.17676	56.8066	5.82799	0.000184863	0.031487	yes	up	0	0	0	0.0673947	0.0410319	0.0361307	0	0.0481858	CDK13-201	LOW QUALITY PROTEIN: cyclin-dependent kinase 13 [Sus scrofa]	XP_020934504.1
Chr18_55341894_55397915	Pig.17676	21.6043	4.43325	7.36462e-07	0.000442859	yes	up	0.015483	0	0.0145242	0.155008	0.191482	0.0794875	0.0100024	0.141992	CDK13-201	LOW QUALITY PROTEIN: cyclin-dependent kinase 13 [Sus scrofa]	XP_020934504.1
Chr18_55387035_55397915	Pig.17676	5.79728	2.53537	5.60126e-09	6.31543e-06	yes	up	0.201279	0.250024	0.0217864	0.788517	0.533415	0.426342	0.157696	0.582758	CDK13-201	LOW QUALITY PROTEIN: cyclin-dependent kinase 13 [Sus scrofa]	XP_020934504.1
Chr18_5546342_5564749	Pig.13668	35.573	5.15271	0.0222562	0.67593	yes	up	0	0	0	0.0269579	0.0341933	0.0289045	0	0.0300186	KMT2C-201	histone-lysine N-methyltransferase 2C isoform X1 [Sus scrofa]	XP_020934780.1
ChrX_116987066_116992029	Pig.08395	25.039	4.6461	0.00987885	0.4368	yes	up	0	0	0	0.0269579	0	0.0289045	0	0.0186208	ATP11C-201	phospholipid-transporting ATPase IG isoform X1 [Sus scrofa]	XP_020935853.1
ChrX_117725135_117726758	MSTRG.42462	14.183	3.82609	1.18888e-10	2.68092e-07	yes	up	0.0696735	0.0138902	0	0.188705	0.259869	0.274593	0.0278546	0.241056	0	0	TKC34226.1
ChrX_16539567_16566142	Pig.05990	0.0599681	-4.05966	0.0307776	0.793183	yes	down	0.0232245	0.0486157	0.0290485	0	0	0	0.0336296	0	PIR-201	pirin [Sus scrofa]	XP_003134991.1
ChrX_32827680_32872783	Pig.01823	17.9785	4.1682	0.0140884	0.510507	yes	up	0	0	0	0	0.0136773	0.0289045	0	0.014194	DMD-205	dystrophin isoform X1 [Sus scrofa]	XP_020935207.1
ChrX_63391855_63406228	Pig.10458	8.42103	3.074	3.25513e-05	0.00772664	yes	up	0	0.0277804	0.0217864	0.0943525	0.0752252	0.0939398	0.0165223	0.0878392	ATRX-201	transcriptional regulator ATRX isoform X1 [Sus scrofa]	XP_020935739.1
ChrX_80695596_80727881	Pig.02331	0.0751607	-3.73388	0.0282676	0.758851	yes	down	0.0232245	0.0277804	0.0290485	0	0	0	0.0266845	0	DIAPH2-203	protein diaphanous homolog 2 isoform X4 [Sus scrofa]	XP_020936138.1
Scaffold118_4072397_4105880	Pig.10810	101.683	6.66794	0.000338772	0.0450875	yes	up	0	0	0	0.107831	0.170966	0.0216784	0	0.100159	RAD54B	LOW QUALITY PROTEIN: DNA repair and recombination protein RAD54B [Sus scrofa]	XP_020944760.1
Scaffold124_4831155_4833214	Pig.11264	6.79742	2.76499	0.00015126	0.0267523	yes	up	0	0.0277804	0.0435727	0.0606552	0.177805	0.0867136	0.0237844	0.108391	HNRNPH3-201	PREDICTED: heterogeneous nuclear ribonucleoprotein H3 isoform X2 [Equus przewalskii]	XP_008505148.1
Scaffold124_5184262_5197695	Pig.11269	2.3928	1.2587	0.0108072	0.465805	yes	up	0.224504	0.166683	0.145242	0.155008	0.60864	0.158975	0.178809	0.307541	CCAR1-205	cell division cycle and apoptosis regulator protein 1 isoform X2 [Sus scrofa]	XP_020928155.1
Scaffold124_5184262_5207718	Pig.11269	3.77261	1.91556	0.0339388	0.816342	yes	up	0	0.0416706	0.0508348	0.0673947	0.15045	0.0289045	0.0308352	0.0822499	CCAR1-205	cell division cycle and apoptosis regulator protein 1 isoform X2 [Sus scrofa]	XP_020928155.1
Scaffold155_4811844_4828350	Pig.12801	0.115526	-3.11371	0.0219183	0.67018	yes	down	0.0387075	0	0.0145242	0	0	0	0.0177439	0	ITGA9-201	integrin alpha-9 isoform X2 [Sus scrofa]	XP_020927318.1
Scaffold158_4430821_4444232		7.69389	2.94371	4.22263e-05	0.0090686	yes	up	0.0232245	0.0833413	0.0217864	0.478502	0.136773	0.0361307	0.042784	0.217135	#N/A	#N/A	#N/A
Scaffold180_4052066_4052919	Pig.13884	0.0249543	-5.32457	0.0227302	0.679197	yes	down	0.10064	0.0208353	0.116194	0	0	0	0.0792229	0	HUWE1-201	E3 ubiquitin-protein ligase HUWE1 isoform X6 [Sus scrofa]	XP_013841606.1
Scaffold288_845822_855512	Pig.17809	0.279172	-1.84078	0.00023592	0.0361329	yes	down	0.178055	0.291694	0.34132	0.0404368	0.0547092	0.050583	0.270356	0.0485763	LAPTM4B-202	lysosomal-associated transmembrane protein 4B [Sus scrofa]	XP_005655413.3
Scaffold3265_5751_23150		130.085	7.02331	0.0251041	0.723764	yes	up	0	0	0	0.283058	0.0752252	0	0	0.119428	#N/A	#N/A	#N/A
Scaffold355_696928_702892	Pig.19342	0.0386525	-4.6933	0.00387834	0.242935	yes	down	0.030966	0.104177	0.0217864	0	0	0	0.0523097	0	NFYC-201	nuclear transcription factor Y subunit gamma isoform X1 [Sus scrofa]	XP_020952633.1
Scaffold419_234994_255861		3.20505	1.68035	0.0359757	0.842859	yes	up	0.046449	0	0.0508348	0.0876131	0.0478706	0.0578091	0.032428	0.0644309	#N/A	#N/A	#N/A
Scaffold433_323241_348156	Pig.20395	10.166	3.34568	0.0135266	0.504174	yes	up	0	0.0138902	0	0.0202184	0.0683865	0.0144523	0.00463007	0.0343524	FKBP15-201	LOW QUALITY PROTEIN: FK506-binding protein 15 [Sus scrofa]	XP_020923286.1
Scaffold4454_9792_9891	MSTRG.44768	3.54885	1.82735	0.0335888	0.810084	yes	up	0.061932	0.118067	0.108932	0.0404368	0.0547092	0.41189	0.0963102	0.169012	0	0	AMB36376.1
Scaffold537_122771_123854	Pig.21009	59.4458	5.8935	0.00329196	0.219641	yes	up	0	0	0	0.0336973	0.0273546	0.0722614	0	0.0444378	ZKSCAN8-201	PREDICTED: LOW QUALITY PROTEIN: zinc finger protein with KRAB and SCAN domains 8 [Capra hircus]	TKC35887.1

## Sheet: N150D_M vs N210D_M_DEcircRNAs
circRNA id	Host gene id	FC(N210D_M/N150D_M)	Log2FC(N210D_M/N150D_M)	Pvalue	Padjust	Significant	Regulate	N150D_M1	N150D_M2	N150D_M3	N210D_M1	N210D_M2	N210D_M3	N150D_M	N210D_M	gene_name	description	nr_hit_name
Chr01_113113103_113118487	Pig.03374	5.82545	2.54237	0.0472814	0.746997	yes	up	0	0.0136773	0	0.0205537	0.0132131	0.0205992	0.0045591	0.018122	ZCCHC2-201	zinc finger CCHC domain-containing protein 2 [Sus scrofa]	XP_020955289.1
Chr01_123269900_123306601	Pig.10767	0.0737561	-3.76109	0.00674257	0.332151	yes	down	0.0202184	0.020516	0.0289045	0	0	0	0.023213	0	SPRED1-201	sprouty-related, EVH1 domain-containing protein 1 isoform X1 [Sus scrofa]	XP_003121670.3
Chr01_124952169_124955995	Pig.10761	0.0524348	-4.25333	0.0283606	1	yes	down	0.0539157	0.0341933	0.0144523	0	0	0	0.0341871	0	EIF2AK4-202	eIF-2-alpha kinase GCN2 isoform X1 [Sus scrofa]	XP_020953532.1
Chr01_125984752_125986449	Pig.10734	4.94818	2.3069	0.0276901	0.629309	yes	up	0.0336973	0.0136773	0	0.0205537	0.0990985	0.0411985	0.0157915	0.0536169	INO80-201	DNA helicase INO80 [Sus scrofa]	XP_003121636.1
Chr01_129010315_129022227	Pig.14315	0.0343909	-4.86183	0.00054836	0.0726458	yes	down	0.0741341	0.0273546	0.0433568	0	0	0	0.0482818	0	CASC4-201	protein CASC4 isoform X1 [Sus scrofa]	XP_020952200.1
Chr01_134883950_134888642	MSTRG.1863,Pig.02307	4.83033	2.27212	0.0251154	0.629309	yes	up	0.0606552	0	0	0.10962	0.046246	0.0549313	0.0202184	0.0702657	#N/A	#N/A	#N/A
Chr01_140726906_140759222	Pig.02266	5.4388	2.44329	0.00362927	0.263295	yes	up	0.613291	0.280385	0.151749	1.38395	1.27507	1.35268	0.348475	1.33723	TEX9-202	testis-expressed sequence 9 protein [Sus scrofa]	NP_001231528.1
Chr01_151532417_151559030	Pig.02203	0.105865	-3.2397	0.00406462	0.27522	yes	down	0.114571	0.0410319	0.0867136	0	0	0.0205992	0.0807722	0.00686641	TCF4-206	transcription factor 4 isoform X1 [Sus scrofa]	XP_020949090.1
Chr01_162166054_162169510	Pig.08979	0.463083	-1.11066	0.0487356	0.746997	yes	down	0.195445	0.335094	0.838232	0.116471	0.244443	0.17166	0.456257	0.177525	SETBP1-201	SET-binding protein isoform X1 [Sus scrofa]	XP_013844009.2
Chr01_182615642_182642829	Pig.00740	0.196716	-2.34581	0.046927	0.746997	yes	down	0.155008	0.0683865	0.0289045	0.0205537	0.0132131	0	0.0840996	0.0112556	CDK19-201	PREDICTED: cyclin-dependent kinase 19-like isoform X1 [Elephantulus edwardii]	XP_020946795.1
Chr01_203615212_203632331	Pig.00838	0.0925953	-3.43292	0.0327983	0.665755	yes	down	0.0336973	0.0273546	0	0	0	0	0.0203506	0	RARS2-201	probable arginine--tRNA ligase, mitochondrial isoform X1 [Sus scrofa]	XP_020945502.1
Chr01_214381281_214383038		17.0879	4.09491	0.0030043	0.260169	yes	up	0	0	0	0.0137025	0.0132131	0.0205992	0	0.0158383	#N/A	#N/A	#N/A
Chr01_227027511_227029923		0.0867402	-3.52716	0.0255405	0.629309	yes	down	0.0134789	0.0136773	0.0289045	0	0	0	0.0186869	0	#N/A	#N/A	#N/A
Chr01_248338604_248340068		0.0885639	-3.49714	0.0458401	0.746997	yes	down	0	0.0752252	0	0	0	0	0.0250751	0	#N/A	#N/A	#N/A
Chr01_255681370_255749091	MSTRG.3307,Pig.16879	0.313384	-1.67399	0.0334298	0.665755	yes	down	0.0606552	0.0820638	0.339628	0.027405	0.0198197	0.0892633	0.160782	0.045496	#N/A	#N/A	#N/A
Chr01_28732821_28737849		0.0998753	-3.32373	0.0388904	0.718176	yes	down	0.0404368	0.0136773	0	0	0	0	0.018038	0	#N/A	#N/A	#N/A
Chr01_36216621_36217740	Pig.03295	0.0347023	-4.84882	0.000385207	0.0586863	yes	down	0.0202184	0.0615479	0.0650352	0	0	0	0.0489338	0	GLIS3-201	zinc finger protein GLIS3 isoform X1 [Sus scrofa]	XP_020930038.1
Chr01_72779231_72783251	Pig.02907	0.0295187	-5.08223	0.000274794	0.0492527	yes	down	0.0269579	0.0136773	0.108392	0	0	0	0.0496757	0	NID2-201	nidogen-2 isoform X1 [Sus scrofa]	XP_020957573.1
Chr01_86268610_86270068	Pig.02846	0.0287326	-5.12117	0.0203478	1	yes	down	0.0808736	0.0683865	0.0361307	0	0	0	0.0617969	0	UACA-209	uveal autoantigen with coiled-coil domains and ankyrin repeats isoform X4 [Sus scrofa]	XP_013848808.1
Chr01_99667043_99684106	Pig.13147	12.3353	3.62472	0.0445937	0.746997	yes	up	0	0	0	0.0205537	0	0.0137328	0	0.0114289	PCSK6-201	proprotein convertase subtilisin/kexin type 6 isoform X4 [Sus scrofa]	XP_020954610.1
Chr02_116577482_116581813	Pig.05904	0.0715848	-3.8042	0.00836927	0.372701	yes	down	0.0269579	0.0547092	0	0	0	0	0.0272224	0	HPS5	Hermansky-Pudlak syndrome 5 protein [Sus scrofa]	NP_001092073.1
Chr02_116803826_116807537	Pig.05908	0.0853028	-3.55126	0.0484571	0.746997	yes	down	0	0.0547092	0.0144523	0	0	0	0.0230538	0	UEVLD-201	PREDICTED: tumor susceptibility gene 101 protein isoform X1 [Galeopterus variegatus]	AEV45769.1
Chr02_15165110_15165811	Pig.17377	0.00636839	-7.29486	0.0025203	0.232708	yes	down	0.12131	0.540254	0.216784	0	0	0	0.292783	0	SEC24A-201	protein transport protein Sec24A [Sus scrofa]	NP_001230853.1
Chr02_159713586_159713781		0.190864	-2.38938	0.0456977	0.746997	yes	down	0.148268	0.0615479	0.144523	0.027405	0	0.0274656	0.118113	0.0182902	#N/A	#N/A	#N/A
Chr02_92738870_92744854	MSTRG.5482	5.48887	2.45651	3.25567e-20	4.96001e-17	yes	up	0.208923	0.170966	0.0722614	0.465885	0.535132	0.748439	0.150717	0.583152	0	0	XP_020935332.1
Chr02_92989110_93068632	Pig.06424	2.18882e-06	-18.8014	0.00116117	0.122003	yes	down	0	0.0478706	0.0867136	0	0	0	0.0448614	0	CYP4F8-201	cytochrome P450, family 4, subfamily F, polypeptide 55 isoform X3 [Sus scrofa]	XP_020935397.1
Chr02_93039238_93079314	Pig.06424	48.5051	5.60006	1.89722e-06	0.000825833	yes	up	0	0.020516	0	0.232942	0.383181	0	0.00683865	0.205374	CYP4F8-201	cytochrome P450, family 4, subfamily F, polypeptide 55 isoform X3 [Sus scrofa]	XP_020935397.1
Chr03_108839582_108909181		0.0503979	-4.31049	0.045166	0.746997	yes	down	0.0336973	0	0.050583	0	0	0	0.0280934	0	#N/A	#N/A	#N/A
Chr03_111576456_111583858	Pig.11639	0.17623	-2.50447	0.024906	0.629309	yes	down	0	0.109418	0.0939398	0	0	0.0274656	0.0677861	0.00915521	SMG1-201	serine/threonine-protein kinase SMG1 isoform X1 [Sus scrofa]	XP_020942206.1
Chr03_20091718_20131946	Pig.20028	4.78347	2.25806	0.01734	0.544691	yes	up	0	0.0273546	0	0.0205537	0.0396394	0.0274656	0.0091182	0.0292196	ASXL2-201	putative Polycomb group protein ASXL2 isoform X1 [Sus scrofa]	XP_020943398.1
Chr03_43301863_43304497	Pig.08241	0.0644413	-3.95587	0.0235493	1	yes	down	0.0269579	0.020516	0.0289045	0	0	0	0.0254595	0	PNPT1-201	polyribonucleotide nucleotidyltransferase 1, mitochondrial [Sus scrofa]	NP_001233196.1
Chr03_76247636_76248435	Pig.09468,MSTRG.8682	0.346088	-1.53079	0.0399468	0.720224	yes	down	0.0336973	0.0683865	0.108392	0.0411075	0.0132131	0	0.0701586	0.0181069	#N/A	#N/A	#N/A
Chr04_105104731_105126008	Pig.01674	0.0830329	-3.59017	0.0189781	0.571993	yes	down	0	0.0341933	0.0289045	0	0	0	0.0210326	0	SLC30A7-202	PREDICTED: zinc transporter 7 [Ceratotherium simum simum]	NP_001129683.1
Chr04_105955370_105988484	Pig.01686,MSTRG.12330	0.0117666	-6.40916	0.000174518	0.0354503	yes	down	2.26446	3.37146	0.289045	0.0411075	0	0	1.97499	0.0137025	#N/A	#N/A	#N/A
Chr04_105969655_105988484	Pig.01686,MSTRG.12330	0.160266	-2.64146	0.0218815	0.600658	yes	down	0.357192	0.581285	0.0361307	0.0342562	0.0330328	0.0274656	0.324869	0.0315849	#N/A	#N/A	#N/A
Chr04_117055265_117065883	MSTRG.12519,Pig.01753	0.0266323	-5.23068	0.000632115	0.0763676	yes	down	0.0404368	0	0.115618	0	0	0	0.0520183	0	#N/A	#N/A	#N/A
Chr04_29129287_29153365	Pig.08103	0.364987	-1.45408	0.00868601	0.372701	yes	down	0.0808736	0.143612	0.216784	0.0616612	0.0330328	0.0274656	0.14709	0.0407199	ZFPM2-204	zinc finger protein ZFPM2 [Sus scrofa]	NP_001182303.1
Chr04_30299278_30333225	Pig.08107	0.134171	-2.89785	0.0385283	0.715828	yes	down	0	0.0683865	0.0650352	0	0	0.0137328	0.0444739	0.00457761	OXR1-205	oxidation resistance protein 1 isoform X4 [Sus scrofa]	XP_013852007.1
Chr04_48646096_48666494	Pig.01448	0.0741246	-3.7539	0.0124312	0.45636	yes	down	0.0269579	0.020516	0.0216784	0	0	0	0.0230507	0	STAU2-203	double-stranded RNA-binding protein Staufen homolog 2 isoform X7 [Sus scrofa]	XP_020944868.1
Chr04_54055643_54066276	Pig.01422	0.0535353	-4.22336	0.0398018	1	yes	down	0.0471763	0.0273546	0.0216784	0	0	0	0.0320698	0	ARFGEF1-201	brefeldin A-inhibited guanine nucleotide-exchange protein 1 [Sus scrofa]	XP_001928045.1
Chr04_55472441_55495387		0.170448	-2.5526	0.0118937	0.453001	yes	down	0.0404368	0.0683865	0.0578091	0	0.0198197	0	0.0555441	0.00660657	#N/A	#N/A	#N/A
Chr04_58547233_58562535	Pig.14062,MSTRG.11105	0.0488872	-4.3544	0.00424452	0.281154	yes	down	0.0471763	0.0752252	0	0	0	0	0.0408005	0	#N/A	#N/A	#N/A
Chr04_59194539_59201400	Pig.14064	0.398108	-1.32877	0.0487865	0.746997	yes	down	0.114571	0.0820638	0.101166	0.0205537	0.046246	0.0205992	0.0992669	0.029133	CHD7-201	chromodomain-helicase-DNA-binding protein 7 isoform X1 [Sus scrofa]	XP_020944993.1
Chr04_81477534_81477997	Pig.10515,MSTRG.11588	0.0558875	-4.16133	0.00454533	0.28525	yes	down	0.0134789	0.0547092	0.0289045	0	0	0	0.0323642	0	#N/A	#N/A	#N/A
Chr04_84437367_84462038	Pig.18107	0.359728	-1.47502	0.0270334	0.629309	yes	down	0.0539157	0.225676	0.0433568	0.0342562	0.0132131	0.0274656	0.107649	0.0249783	SNX27-201	sorting nexin-27 [Bos taurus]	XP_003125809.1
Chr04_84654052_84655582		0.0578262	-4.11213	0.00632861	0.321388	yes	down	0.0673947	0.0273546	0	0	0	0	0.0315831	0	#N/A	#N/A	#N/A
Chr04_86395408_86418333	Pig.20616,MSTRG.11878	0.482345	-1.05186	0.0463474	0.746997	yes	down	0.114571	0.0820638	0.0939398	0.0411075	0.0198197	0.0411985	0.0968582	0.0340419	#N/A	#N/A	#N/A
Chr04_98096686_98108020		104385	16.6716	0.0212345	0.593592	yes	up	0	0	0	0	0.0132131	0	0	0.00440438	#N/A	#N/A	#N/A
Chr05_100417386_100424571	Pig.11745	0.0838713	-3.57568	0.0337522	1	yes	down	0.0134789	0.0615479	0	0	0	0	0.0250089	0	PPP1R12A-203	PREDICTED: protein phosphatase 1 regulatory subunit 12A isoform X2 [Ailuropoda melanoleuca]	XP_020948470.1
Chr05_21900001_21921463	Pig.14007	0.0478065	-4.38665	0.00564576	0.306804	yes	down	0.0404368	0.0273546	0.0361307	0	0	0	0.0346407	0	ATXN10-201	ataxin-10 isoform X1 [Sus scrofa]	XP_013852916.2
Chr05_33008943_33026515	Pig.05474	9.81768	3.29538	0.0238552	0.629309	yes	up	0	0	0	0	0.0264263	0	0	0.00880876	IRAK3-201	interleukin-1 receptor-associated kinase 3 [Sus scrofa]	XP_020947619.1
Chr05_42533552_42543182	Pig.20738	0.19684	-2.34491	0.0277883	0.629309	yes	down	0.0606552	0.10258	0.0722614	0	0.0132131	0.0205992	0.0784988	0.0112708	TMEM19-202	PREDICTED: ras-related protein Rab-21 [Felis catus]	XP_003989098.1
Chr05_61728003_61728231	Pig.18710	0.0637978	-3.97035	0.00458722	0.28525	yes	down	0.0134789	0.0410319	0.0289045	0	0	0	0.0278051	0	PTMS	PREDICTED: parathymosin, partial [Camelus bactrianus]	XP_010956138.1
Chr05_75858259_75868552	MSTRG.14257	0.0390848	-4.67725	0.019219	0.571993	yes	down	0.0336973	0	0.0722614	0	0	0	0.0353196	0	0	0	XP_020948239.1
Chr06_117850632_117851180	MSTRG.17397,Pig.20055	0.332877	-1.58694	0.0406294	0.720753	yes	down	0.0471763	0.0889025	0.0867136	0.0205537	0.0132131	0.0205992	0.0742641	0.018122	#N/A	#N/A	#N/A
Chr06_119442930_119443236	Pig.17179	0.0441851	-4.50029	0.00828989	0.372701	yes	down	0	0.0410319	0.0650352	0	0	0	0.0353557	0	PRKD2-201	serine/threonine-protein kinase D2 isoform X2 [Sus scrofa]	XP_020950267.1
Chr06_124342503_124342926	Pig.16121	0.247191	-2.0163	0.0234808	0.628911	yes	down	0.0269579	0.0547092	0.0939398	0	0	0.034332	0.0585356	0.011444	ECH1-202	delta(3,5)-Delta(2,4)-dienoyl-CoA isomerase, mitochondrial [Sus scrofa]	NP_001038072.1(delta(3,5)-Delta
Chr06_127927287_127934404	Pig.15970	0.0648976	-3.94569	0.0204944	0.58361	yes	down	0.0202184	0.0410319	0.0216784	0	0	0	0.0276429	0	UBA2	PREDICTED: SUMO-activating enzyme subunit 2 [Vicugna pacos]	XP_006217089.1
Chr06_142687539_142700706	Pig.14286	0.480907	-1.05617	0.0255683	0.629309	yes	down	0.148268	0.136773	0.137297	0.0137025	0.0528526	0.0823969	0.140779	0.0496507	NUDT21-201	cleavage and polyadenylation specificity factor subunit 5 [Sus scrofa]	NP_001231176.1
Chr06_160725112_160742417	Pig.15713	0.352679	-1.50357	0.0375885	0.70878	yes	down	0.0336973	0.129934	0.101166	0	0.0330328	0.034332	0.0882659	0.022455	CFDP1-201	craniofacial development protein 1 [Sus scrofa]	XP_020949434.1
Chr06_16875956_16911354	Pig.15137	0.234851	-2.09018	0.0203412	0.58361	yes	down	0.0336973	0.0410319	0.166201	0.0342562	0	0.0137328	0.0803101	0.0159963	FGGY-202	FGGY carbohydrate kinase domain-containing protein isoform X5 [Sus scrofa]	XP_020953459.1
Chr06_2639450_2674494	Pig.12657	0.371369	-1.42907	0.0430472	0.741044	yes	down	0.0336973	0.0889025	0.101166	0.0137025	0.0330328	0.0137328	0.0745886	0.0201561	ERI3-203	ERI1 exoribonuclease 3 isoform X1 [Sus scrofa]	XP_020952446.1
Chr06_49238260_49238933	Pig.02789	0.224483	-2.15532	0.0328724	0.665755	yes	down	0.0673947	0.020516	0.0361307	0.0205537	0	0	0.0413471	0.00685124	KIAA1328-202	protein hinderin isoform X5 [Sus scrofa]	XP_020951945.1
Chr06_54384938_54388312	Pig.03597	0.329782	-1.60041	0.0291547	0.629309	yes	down	0.0606552	0.15045	0.0650352	0.0411075	0.0198197	0	0.0920469	0.0203091	RNF138-202	PREDICTED: E3 ubiquitin-protein ligase RNF138 isoform X1 [Panthera pardus]	XP_004412977.1
Chr06_61228450_61234606	MSTRG.15623,Pig.03622	0.067019	-3.89929	0.00483385	0.288799	yes	down	0.0269579	0.020516	0.0289045	0	0	0	0.0254595	0	#N/A	#N/A	#N/A
Chr06_61228450_61283077	MSTRG.15623,Pig.03622	0.213905	-2.22496	0.0142083	0.497618	yes	down	0.0202184	0.0820638	0.0722614	0	0	0.0274656	0.0581812	0.00915521	#N/A	#N/A	#N/A
Chr06_61249444_61283077	MSTRG.15623,Pig.03622	0.196973	-2.34393	0.0280917	0.629309	yes	down	0.0269579	0.0136773	0.0867136	0	0.0198197	0	0.0424496	0.00660657	#N/A	#N/A	#N/A
Chr06_6319537_6337357	Pig.12596	0.04456	-4.48811	0.00602511	0.311265	yes	down	0.0134789	0.0478706	0.050583	0	0	0	0.0373108	0	SPATA6-201	spermatogenesis-associated protein 6 [Sus scrofa]	NP_001171388.1
Chr06_71718259_71725788	Pig.03686	0.244946	-2.02946	0.0469592	0.746997	yes	down	0.0606552	0.0889025	0.0144523	0	0	0.0274656	0.05467	0.00915521	NDUFV2-202	NADH dehydrogenase [ubiquinone]	NP_001090944.2
Chr06_71786235_71818899	Pig.03687	0.0408482	-4.61358	0.00305785	0.260169	yes	down	0.0336973	0.0478706	0.0433568	0	0	0	0.0416416	0	ANKRD12-201	ankyrin repeat domain-containing protein 12 isoform X1 [Sus scrofa]	XP_020951722.1
Chr06_78493883_78508305	Pig.03001	5.46534	2.45031	0.0406412	0.720753	yes	up	0	0.0341933	0	0.0411075	0.0264263	0.0480649	0.0113978	0.0385329	AGO1-202	protein argonaute-3 [Bos taurus]	NP_001001133.2
Chr06_96042171_96051495	Pig.08606	22.1356	4.4683	0.00418405	1	yes	up	0	0	0	0.0137025	0.0330328	0.0137328	0	0.0201561	DDI1-201	PREDICTED: protein DDI1 homolog 2 isoform X2 [Orcinus orca]	XP_012389449.1
Chr07_109969272_109992959	Pig.09261	0.0174511	-5.84054	0.000509734	0.0705981	yes	down	0.12805	0	0.122844	0	0	0	0.0836314	0	ADGRF5-201	LOW QUALITY PROTEIN: adhesion G protein-coupled receptor F5 [Sus scrofa]	XP_013833469.2
Chr07_114011462_114013898	MSTRG.21313,Pig.09323	22.1697	4.47052	0.0310209	1	yes	up	0	0	0	0.0137025	0.0330328	0.0137328	0	0.0201561	#N/A	#N/A	#N/A
Chr07_121154190_121180103	Pig.17302	0.0799627	-3.64453	0.0163999	0.5316	yes	down	0.0202184	0.0547092	0	0	0	0	0.0249759	0	ILRUN-201	uncharacterized protein C6orf106 homolog isoform 2 [Mus musculus]	NP_001038184.1
Chr07_123110937_123127062		0.0694502	-3.84788	0.0207287	0.584817	yes	down	0.0269579	0.0136773	0.0289045	0	0	0	0.0231799	0	#N/A	#N/A	#N/A
Chr07_127317226_127328596	Pig.11473	0.262033	-1.93218	0.048644	0.746997	yes	down	0.0336973	0.0273546	0.195106	0	0.0330328	0.0274656	0.0853859	0.0201662	Tnxb	tenascin-X isoform X5 [Sus scrofa]	XP_020953995.1
Chr07_27402792_27412673	Pig.18234	2.52526	1.33643	0.0290267	0.629309	yes	up	0.0539157	0.123096	0.0216784	0.143876	0.092492	0.0892633	0.06623	0.108544	MARK1-201	MAP/microtubule affinity-regulating kinase 3 isoform X1 [Sus scrofa]	XP_020937247.1
Chr07_35429135_35449112	MSTRG.19801	5.13211e+09	32.2569	2.23622e-21	6.81375e-18	yes	up	0	0	0	0.0411075	0	0	0	0.0137025	0	0	XP_001928879.1
Chr07_5561084_5568809	Pig.15440,MSTRG.19214	0.0722763	-3.79033	0.0290367	0.629309	yes	down	0	0.020516	0.0433568	0	0	0	0.0212909	0	#N/A	#N/A	#N/A
Chr07_66020931_66031992	Pig.04276	0.064176	-3.96182	0.0044075	0.28525	yes	down	0.0269579	0.0341933	0.0216784	0	0	0	0.0276098	0	CHD2	chromodomain-helicase-DNA-binding protein 2 isoform X1 [Sus scrofa]	XP_013833723.1
Chr07_78284745_78314204	MSTRG.20541	0.000595696	-10.7131	2.03627e-05	0.00620452	yes	down	56.9013	32.3537	0.0361307	0.0205537	0	0.0137328	29.7637	0.0114289	0	0	XP_020954893.1
Chr07_78295549_78323727	MSTRG.20541	1.8275e-08	-25.7056	0.000334637	0.0536652	yes	down	0	0	0.50583	0	0	0	0.16861	0	0	0	XP_020954893.1
Chr07_88769017_88792416	Pig.08431	0.0928464	-3.42901	0.0338815	0.670369	yes	down	0.0269579	0.0136773	0.0144523	0	0	0	0.0183625	0	SNX6-202	sorting nexin-6 [Sus scrofa]	NP_001231145.1
Chr07_97375124_97392874	Pig.08771	0.0573769	-4.12339	0.00314502	0.260169	yes	down	0	0.0478706	0.0433568	0	0	0	0.0304091	0	ETFA-201	electron transfer flavoprotein subunit alpha, mitochondrial [Sus scrofa]	NP_001231332.1
Chr08_11710628_11761156	Pig.04178	20.834	4.38087	0.0387523	1	yes	up	0	0	0	0.05481	0	0	0	0.01827	RAPGEF2-201	rap guanine nucleotide exchange factor 6-like [Sus scrofa]	XP_020956965.1
Chr08_118273370_118291983	Pig.00645	0.0886021	-3.49651	0.0110799	0.441021	yes	down	0	0.0136773	0.0433568	0	0	0	0.0190114	0	PPA2-206	inorganic pyrophosphatase 2, mitochondrial isoform X1 [Sus scrofa]	XP_020957372.1
Chr08_127168216_127192837	Pig.00602	0.0761308	-3.71538	0.0449804	1	yes	down	0	0.0273546	0.0361307	0	0	0	0.0211618	0	PDLIM5-202	PDZ and LIM domain protein 5 isoform X1 [Sus scrofa]	XP_020957405.1
Chr08_132724217_132726270	Pig.00584	0.0770562	-3.69795	0.0441019	0.746997	yes	down	0.0202184	0.0615479	0	0	0	0	0.0272554	0	HERC6-201	probable E3 ubiquitin-protein ligase HERC6 isoform X2 [Sus scrofa]	XP_020956419.1
Chr08_135827082_135836912		0.143741	-2.79846	0.0139946	0.495831	yes	down	0.0539157	0.136773	0.0289045	0	0.0198197	0	0.0731978	0.00660657	#N/A	#N/A	#N/A
Chr08_139877592_139902897	Pig.00525	0.0294155	-5.08728	9.09753e-05	0.0231001	yes	down	0.0539157	0.0547092	0.0650352	0	0	0	0.0578867	0	ANTXR2-205	anthrax toxin receptor 2 [Sus scrofa]	XP_003129419.3
Chr08_30824564_30832606	Pig.07242	0.0222772	-5.48829	0.0197591	0.578904	yes	down	0	0	0.166201	0	0	0	0.0554004	0	RELL1-201	RELT-like protein 1 [Sus scrofa]	XP_013834043.2
Chr08_41107578_41109317	Pig.19832	0.140406	-2.83232	0.0254056	0.629309	yes	down	0.0202184	0.0615479	0.050583	0	0	0.0137328	0.0441164	0.00457761	CCDC149-201	coiled-coil domain-containing protein 149 isoform X3 [Sus scrofa]	XP_020956219.1
Chr08_43322535_43360726	Pig.05313	0.461256	-1.11636	0.0392064	0.718396	yes	down	0.330234	0.635995	0.252915	0.157579	0.0858854	0.137328	0.406381	0.126931	ADGRA3-201	adhesion G protein-coupled receptor A3 isoform X1 [Sus scrofa]	XP_020956719.1
Chr08_49633206_49660217	Pig.05336	0.0875332	-3.51403	0.00905149	0.372701	yes	down	0.0134789	0.0341933	0.0144523	0	0	0	0.0207082	0	CPEB2-201	cytoplasmic polyadenylation element-binding protein 2 isoform X1 [Sus scrofa]	XP_020955979.1
Chr08_56552112_56569176		0.0671294	-3.89691	0.0111449	0.441021	yes	down	0	0.0410319	0.0361307	0	0	0	0.0257209	0	#N/A	#N/A	#N/A
Chr08_67440824_67447492		0.10173	-3.29718	0.0279197	0.629309	yes	down	0	0.0410319	0.0144523	0	0	0	0.0184947	0	#N/A	#N/A	#N/A
Chr09_109155145_109160398	Pig.11684	0.0510082	-4.29313	0.00743012	0.348301	yes	down	0.0336973	0.0273546	0.0361307	0	0	0	0.0323942	0	PICALM-207	phosphatidylinositol-binding clathrin assembly protein isoform X6 [Sus scrofa]	XP_020957732.1
Chr09_110087896_110090875	Pig.11675	0.0975194	-3.35817	0.033223	0.665755	yes	down	0.0134789	0.0273546	0.0144523	0	0	0	0.0184286	0	TMEM135-201	transmembrane protein 135 isoform X1 [Sus scrofa]	XP_020918270.1
Chr09_110087896_110112039	Pig.11675	0.10661	-3.22959	0.0284196	0.629309	yes	down	0	0	0.0433568	0	0	0	0.0144523	0	TMEM135-201	transmembrane protein 135 isoform X1 [Sus scrofa]	XP_020918270.1
Chr09_117431858_117432524	Pig.08148	0.413098	-1.27544	0.0262294	0.629309	yes	down	0.0943525	0.56077	0.31795	0.05481	0.092492	0.137328	0.324357	0.0948767	CEP57	centrosomal protein of 57 kDa isoform X1 [Sus scrofa]	XP_020918348.1
Chr09_134901601_134905385	Pig.10236	0.295886	-1.75689	0.0357051	0.688567	yes	down	0.101092	0.164128	0.0433568	0.0137025	0.0198197	0.0274656	0.102859	0.0203293	CLNS1A-201	Methylosome subunit pICln, partial [Bos mutus]	XP_003482618.1
Chr09_16522266_16542844	Pig.04694	6.84541	2.77514	0.0249135	0.629309	yes	up	0	0.109418	0	0.0479587	0.138738	0.240324	0.0364728	0.14234	CEP350	LOW QUALITY PROTEIN: centrosome-associated protein 350 [Sus scrofa]	XP_020919409.1
Chr09_4458935_4472095	Pig.14410	9.45984	3.24182	0.0479694	0.746997	yes	up	0	0	0	0	0	0.0274656	0	0.00915521	CD46	membrane cofactor protein isoform X1 [Sus scrofa]	XP_020957856.1
Chr09_60430146_60496454	Pig.00397	0.100389	-3.31633	0.0429163	0.741044	yes	down	0.0336973	0	0.0144523	0	0	0	0.0160499	0	GLCCI1-202	glucocorticoid-induced transcript 1 protein isoform X1 [Sus scrofa]	XP_020958076.1
Chr09_9021989_9036996	Pig.14356	0.0872011	-3.51951	0.0398077	0.720224	yes	down	0	0.0410319	0.0216784	0	0	0	0.0209034	0	FLVCR1-202	feline leukemia virus subgroup C receptor-related protein 1 [Sus scrofa]	NP_001136318.1
Chr10_14523_14657		47.1792	5.56008	0.0303419	0.642025	yes	up	0	0	0	0	0.125525	0	0	0.0418416	#N/A	#N/A	#N/A
Chr10_15356518_15357043		11.2844	3.49626	0.00315925	0.260169	yes	up	0	0	0.0144523	0.0342562	0.0198197	0.0617977	0.00481742	0.0386245	#N/A	#N/A	#N/A
Chr10_1913538_1919786	Pig.17959	1.42587e-07	-22.7417	5.27178e-12	5.35437e-09	yes	down	1.34115	1.54554	0	0	0	0	0.96223	0	SCCPDH-201	uncharacterized protein LOC100521600 isoform X2 [Sus scrofa]	XP_020937812.1
Chr10_47461622_47473846	Pig.09684	0.0704776	-3.82669	0.0102102	0.414806	yes	down	0	0.0478706	0.0289045	0	0	0	0.0255917	0	NRP1-201	neuropilin-1 isoform X2 [Sus scrofa]	XP_003130846.1
Chr10_47499969_47503372	Pig.09684	0.04849	-4.36617	0.02353	0.628911	yes	down	0.0134789	0.020516	0.0578091	0	0	0	0.0306013	0	NRP1-201	neuropilin-1 isoform X2 [Sus scrofa]	XP_003130846.1
Chr10_53362294_53363531	Pig.16905	0.0572232	-4.12726	0.00686758	0.332151	yes	down	0.0471763	0.0547092	0	0	0	0	0.0339618	0	ARHGAP21-201	LOW QUALITY PROTEIN: rho GTPase-activating protein 21 [Sus scrofa]	XP_020920575.1
Chr10_5620193_5672558	MSTRG.26009,Pig.12503	0.0483796	-4.36946	0.00899932	0.372701	yes	down	0.0404368	0	0.050583	0	0	0	0.0303399	0	#N/A	#N/A	#N/A
Chr10_6550689_6551653	MSTRG.26043	0.165491	-2.59518	0.0376837	0.70878	yes	down	0.0134789	0.0615479	0.166201	0	0.0330328	0	0.0804093	0.0110109	0	0	XP_026365342.1
Chr10_71656721_71659985	MSTRG.27025,Pig.05070	2.63702	1.39891	0.0278688	0.629309	yes	up	0.0741341	0.184644	0.0216784	0.212389	0.0726723	0.185393	0.0934854	0.156818	#N/A	#N/A	#N/A
Chr10_79750648_79751650	Pig.09964,MSTRG.27211	2.68723	1.42612	0.00245832	0.232708	yes	up	0.195445	0.136773	0.0216784	0.184984	0.204804	0.260924	0.117965	0.216904	#N/A	#N/A	#N/A
Chr11_1141966_1143058	Pig.20214	0.060259	-4.05268	0.0193355	0.571993	yes	down	0	0.0136773	0.0578091	0	0	0	0.0238288	0	Col4a1	collagen alpha-1(IV) chain [Castor canadensis]	XP_020921569.1
Chr11_12201402_12222536	Pig.03511	2.07322	1.05187	0.0318658	0.661534	yes	up	0.0808736	0.0683865	0.0433568	0.0822149	0.0594591	0.144195	0.0642056	0.0952895	PAN3-201	PAB-dependent poly(A)-specific ribonuclease subunit PAN3 isoform X1 [Sus scrofa]	XP_005668351.1
Chr11_12222375_12278556	Pig.03511	0.0496223	-4.33287	0.00143067	0.145309	yes	down	0.0336973	0.0341933	0.0361307	0	0	0	0.0346738	0	PAN3-201	PAB-dependent poly(A)-specific ribonuclease subunit PAN3 isoform X1 [Sus scrofa]	XP_005668351.1
Chr11_7762796_7763348	Pig.03542	0.373758	-1.41982	0.0179251	0.557323	yes	down	0.0741341	0.0683865	0.231236	0.0342562	0.0132131	0.0686641	0.124586	0.0387112	XPO4-202	exportin-4 isoform X1 [Sus scrofa]	XP_020921096.1
Chr11_9883781_9888954	Pig.03530	0.179079	-2.48133	0.026349	0.629309	yes	down	1.2131	0.116257	0.838232	0.0822149	0.145345	0.0892633	0.722531	0.105608	NUP58-201	PREDICTED: nucleoporin p58/p45, partial [Vicugna pacos]	XP_023105795.1
Chr12_11843480_11891592	MSTRG.28723	0.00406778	-7.94154	7.50822e-05	0.0207978	yes	down	64.3552	0.0273546	0.0361307	0.0479587	0.0594591	0.0823969	21.4729	0.0632716	0	0	XP_020921875.1
Chr12_15371151_15382081	Pig.18677,MSTRG.28969	21.3349	4.41514	0.0298932	1	yes	up	0	0	0	0	0.0264263	0.034332	0	0.0202528	#N/A	#N/A	#N/A
Chr12_16777744_16780502	Pig.17606	0.0509851	-4.29378	0.00770212	0.355581	yes	down	0.0336973	0.0273546	0.0361307	0	0	0	0.0323942	0	ANKFY1-204	rabankyrin-5 isoform X1 [Sus scrofa]	XP_013836683.2
Chr12_24088630_24104595	Pig.11798	0.0416553	-4.58536	0.00508012	0.292059	yes	down	0	0.0889025	0.0433568	0	0	0	0.0440864	0	RHOT1-201	PREDICTED: mitochondrial Rho GTPase 1, partial [Manis javanica]	XP_003797228.1
Chr12_24249907_24256251	Pig.11795	0.0390844	-4.67726	0.000308183	0.0521686	yes	down	0.0404368	0.0889025	0.0144523	0	0	0	0.0479305	0	ZNF207-205	PREDICTED: BUB3-interacting and GLEBS motif-containing protein ZNF207 isoform X3 [Ovis aries]	XP_020923110.1
Chr12_27032693_27034903	Pig.11236	28.921	4.85405	0.000761972	0.0829189	yes	up	0	0	0	0.0205537	0.0132131	0.0480649	0	0.0272772	TAF15-201	TATA-binding protein-associated factor 2N [Sus scrofa]	XP_022408278.1
Chr12_27312206_27323763	MSTRG.29412,Pig.11225	1.94102e+07	24.2103	0.000221069	0.0420998	yes	up	0	0	0	0	2.05464	0	0	0.684881	#N/A	#N/A	#N/A
Chr12_27312206_27348924	MSTRG.29412,Pig.11225	84.7632	6.40537	7.33925e-07	0.000372712	yes	up	0.0202184	0.0136773	0	0.93862	0.9051	0	0.0112986	0.614573	#N/A	#N/A	#N/A
Chr12_27312212_27331982	MSTRG.29412,Pig.11225	28.3723	4.82641	0.039107	1	yes	up	0	0	0	0.05481	0.0198197	0	0	0.0248766	#N/A	#N/A	#N/A
Chr12_34756374_34763754	Pig.13398	2.46588	1.3021	0.0345581	0.677801	yes	up	0	0.0273546	0.050583	0.0479587	0.0198197	0.0686641	0.0259792	0.0454808	PCTP	phosphatidylcholine transfer protein isoform X1 [Sus scrofa]	XP_020922913.1
Chr12_48641949_48684250		155.553	7.28127	5.11929e-06	0.00173316	yes	up	0	0	0	0.116471	0.138738	0.178527	0	0.144579	#N/A	#N/A	#N/A
Chr12_6535923_6554029		0.0456975	-4.45174	0.00678436	0.332151	yes	down	0.0269579	0.0136773	0.0578091	0	0	0	0.0328148	0	#N/A	#N/A	#N/A
Chr12_6974079_7002516		0.272039	-1.87812	0.0448145	0.746997	yes	down	0.0336973	0.0341933	0.0650352	0	0.0264263	0	0.0443086	0.00880876	#N/A	#N/A	#N/A
Chr13_119129735_119135708	MSTRG.32525,Pig.02129	0.0715302	-3.8053	0.00741465	0.348301	yes	down	0.0134789	0.020516	0.0361307	0	0	0	0.0233752	0	#N/A	#N/A	#N/A
Chr13_119129735_119141267	MSTRG.32525,Pig.02129	10.0022	3.32224	0.0293278	0.629309	yes	up	0	0	0	0.027405	0	0	0	0.00913499	#N/A	#N/A	#N/A
Chr13_124761733_124776078	Pig.02101	9.34571	3.2243	0.0297224	0.633316	yes	up	0	0.0273546	0	0.0411075	0.0330328	0.0823969	0.0091182	0.0521791	SPICE1	spindle and centriole-associated protein 1 isoform X1 [Sus scrofa]	XP_020926017.1
Chr13_126109833_126119217	Pig.02084	0.124363	-3.00737	0.0455343	0.746997	yes	down	0	0.020516	0.0216784	0	0	0	0.0140648	0	PHLDB2-201	LOW QUALITY PROTEIN: pleckstrin homology-like domain family B member 2 [Sus scrofa]	XP_020926050.1
Chr13_126832355_126850038	Pig.02081	0.210342	-2.24919	2.68696e-06	0.0010234	yes	down	0.2561	0.382965	0.231236	0.0685124	0.0132131	0.0480649	0.2901	0.0432635	NECTIN3-201	nectin-3 isoform X2 [Sus scrofa]	XP_020926054.1
Chr13_1453412_1456629	MSTRG.30515	10.4632	3.38725	2.67317e-07	0.000162903	yes	up	0.269579	0.164128	0.122844	1.13046	1.79699	1.25655	0.185517	1.39466	0	0	NP_001137400.1
Chr13_153304760_153311960	Pig.00962,MSTRG.32815	0.0396158	-4.65778	0.000407732	0.0591599	yes	down	0.0269579	0.0341933	0.0650352	0	0	0	0.0420621	0	#N/A	#N/A	#N/A
Chr13_160160121_160194820	Pig.00975	0.0564394	-4.14715	0.0136266	0.494288	yes	down	0.0539157	0	0.0289045	0	0	0	0.0276068	0	USP25-201	ubiquitin carboxyl-terminal hydrolase 25 isoform X2 [Sus scrofa]	TEA26425.1
Chr13_169351797_169415970	Pig.15023	440.525	8.78308	0.000117895	0.0262579	yes	up	0	0	0	0.280901	0.23123	0.748439	0	0.42019	APP-203	PREDICTED: amyloid beta A4 protein, partial [Galeopterus variegatus]	NP_999537.1
Chr13_186934175_186944789	Pig.15115	0.0849146	-3.55784	0.0462038	0.746997	yes	down	0.0606552	0	0	0	0	0	0.0202184	0	TRAPPC10	trafficking protein particle complex subunit 10 [Sus scrofa]	XP_020926737.1
Chr13_46374878_46382501		10.0299	3.32623	0.0382178	1	yes	up	0.0134789	0	0	0.0205537	0.0264263	0.0549313	0.00449298	0.0339704	#N/A	#N/A	#N/A
Chr13_46999542_47004922		0.074832	-3.7402	0.0184551	0.563745	yes	down	0.0134789	0.0136773	0.0361307	0	0	0	0.0210956	0	#N/A	#N/A	#N/A
Chr13_49534611_49537459		4.18492	2.0652	0.0384583	0.715828	yes	up	0.0336973	0	0.0144523	0.027405	0.0528526	0.0755305	0.0160499	0.0519293	#N/A	#N/A	#N/A
Chr13_55003824_55067505	Pig.06075	0.11695	-3.09603	0.0355798	0.688567	yes	down	0.0202184	0	0.0216784	0	0	0	0.0139656	0	PCCB-205	propionyl-CoA carboxylase beta chain, mitochondrial precursor [Sus scrofa]	NP_999066.1
Chr13_55034018_55067505	Pig.06075	2.6935	1.42948	0.0163336	0.5316	yes	up	0.0471763	0.164128	0.0289045	0.123322	0.112312	0.185393	0.0800695	0.140342	PCCB-205	propionyl-CoA carboxylase beta chain, mitochondrial precursor [Sus scrofa]	NP_999066.1
Chr13_57321321_57326544		0.218046	-2.1973	0.0393739	0.718396	yes	down	0.0404368	0.0683865	0.0578091	0	0	0.0274656	0.0555441	0.00915521	#N/A	#N/A	#N/A
Chr13_86777964_86842481	Pig.11303	3.8884	1.95918	0.0361516	0.692792	yes	up	0	0.157289	0	0.0685124	0.145345	0.130462	0.0524297	0.114773	PHC3-201	polyhomeotic-like protein 3 isoform X1 [Sus scrofa]	XP_020925436.1
Chr13_86836296_86842481	Pig.11303	9.39448	3.23181	1.01477e-10	7.72998e-08	yes	up	0.208923	0.649672	0.151749	1.61689	1.56576	3.01435	0.336781	2.06567	PHC3-201	polyhomeotic-like protein 3 isoform X1 [Sus scrofa]	XP_020925436.1
Chr13_9373192_9382165	Pig.15883	0.0655227	-3.93186	0.00904439	0.372701	yes	down	0.0404368	0.0478706	0	0	0	0	0.0294358	0	ARIH2-204	E3 ubiquitin-protein ligase ARIH2 isoform X1 [Sus scrofa]	XP_003132245.3
Chr13_98957260_98960952	Pig.06483	4.84376	2.27613	0.0272249	0.629309	yes	up	0	0.0478706	0	0.0479587	0.0396394	0.0549313	0.0159569	0.0475098	MCCC1-201	methylcrotonoyl-CoA carboxylase subunit alpha, mitochondrial isoform X1 [Sus scrofa]	XP_020925546.1
Chr14_101276771_101293743	Pig.01977	12.7246	3.66955	0.0258763	0.629309	yes	up	0	0	0	0.0342562	0	0	0	0.0114187	BTAF1-202	TATA-binding protein-associated factor 172 isoform X1 [Sus scrofa]	XP_003359339.2
Chr14_101508833_101519659	Pig.01976	0.052625	-4.24811	0.0367767	0.700367	yes	down	0.0539157	0.020516	0.0216784	0	0	0	0.0320367	0	CPEB3-201	cytoplasmic polyadenylation element-binding protein 3 isoform X1 [Sus scrofa]	XP_020929151.1
Chr14_120756086_120760994	Pig.05127	0.091982	-3.4425	0.0291366	0.629309	yes	down	0.0134789	0.020516	0.0216784	0	0	0	0.0185578	0	GPAM-201	NR:NA	F1S5L4.3
Chr14_129722138_129804031	MSTRG.35885,Pig.12074	0.0841943	-3.57013	0.00880005	0.372701	yes	down	0.0202184	0.020516	0.0216784	0	0	0	0.0208043	0	#N/A	#N/A	#N/A
Chr14_129750351_129804031	MSTRG.35885,Pig.12074	0.11306	-3.14484	0.0202428	0.58361	yes	down	0.0269579	0.020516	0	0	0	0	0.0158246	0	#N/A	#N/A	#N/A
Chr14_129787047_129804031	MSTRG.35885,Pig.12074	0.159215	-2.65095	0.0247381	0.629309	yes	down	0.0336973	0.0410319	0.0433568	0	0.0132131	0	0.039362	0.00440438	#N/A	#N/A	#N/A
Chr14_139317642_139339398		0.0863811	-3.53314	0.0398415	1	yes	down	0.0202184	0.0273546	0.0144523	0	0	0	0.0206751	0	#N/A	#N/A	#N/A
Chr14_18956851_18968133		66.5007	6.0553	0.00166517	0.163671	yes	up	0	0	0	0.0822149	0.0330328	0.0686641	0	0.061304	#N/A	#N/A	#N/A
Chr14_20015252_20015712	Pig.10671,MSTRG.33945	4.45254	2.15463	0.000643145	0.0763676	yes	up	0.0539157	0.109418	0.0361307	0.267199	0.0990985	0.233458	0.0664883	0.199918	#N/A	#N/A	#N/A
Chr14_21611369_21624122	Pig.15735	0.0955843	-3.38708	0.0482192	0.746997	yes	down	0	0	0.0433568	0	0	0	0.0144523	0	DISC1-201	disrupted in schizophrenia 1 protein isoform X1 [Sus scrofa]	XP_020929235.1
Chr14_24358485_24362402	Pig.15749	0.0820887	-3.60667	0.0305861	0.64273	yes	down	0	0.0341933	0.0289045	0	0	0	0.0210326	0	ARID4B-201	AT-rich interactive domain-containing protein 4B isoform X1 [Sus scrofa]	XP_020930058.1
Chr14_64265041_64269173	Pig.07164	0.326226	-1.61605	0.0466613	0.746997	yes	down	0.0741341	0.0752252	0.303498	0.0479587	0.0198197	0.0617977	0.150952	0.043192	ATP2A2-201	sarcoplasmic/endoplasmic reticulum calcium ATPase 2 isoform X1 [Sus scrofa]	XP_020927734.1
Chr14_65287728_65290729	Pig.07150	0.292613	-1.77294	0.00326824	0.262061	yes	down	0.155008	0.10258	0.0939398	0.0411075	0	0.034332	0.117176	0.0251465	ATXN2-201	ataxin-2 isoform X3 [Sus scrofa]	XP_020928569.1
Chr14_73539866_73546621		0.0561966	-4.15337	0.0256198	0.629309	yes	down	0	0.123096	0	0	0	0	0.0410319	0	#N/A	#N/A	#N/A
Chr15_101637222_101643355	Pig.00067	0.107893	-3.21232	0.0416016	0.732717	yes	down	0	0.0273546	0.0216784	0	0	0	0.0163443	0	HECW1-201	E3 ubiquitin-protein ligase HECW2 [Sus scrofa]	NP_001185853.1
Chr15_107692551_107693830	Pig.00015	2.59698	1.37683	0.0162504	0.5316	yes	up	0.0673947	0.246191	0.0650352	0.178132	0.290689	0.164794	0.126207	0.211205	BMPR2-201	bone morphogenetic protein receptor type-2 precursor [Sus scrofa]	NP_001191829.1
Chr15_107798196_107811074	Pig.00014	0.0630556	-3.98723	0.00393153	0.272258	yes	down	0.0202184	0.0341933	0.0289045	0	0	0	0.0277721	0	FAM117B-201	protein FAM117B isoform X1 [Sus scrofa]	XP_003133638.2
Chr15_111101369_111101489		91.1969	6.51091	0.017319	0.544691	yes	up	0	0	0	0.0959174	0.0726723	0.0823969	0	0.0836622	#N/A	#N/A	#N/A
Chr15_133653915_133657150	Pig.08723	0.0499474	-4.32345	0.0114049	0.445524	yes	down	0.0404368	0.020516	0.0361307	0	0	0	0.0323611	0	PSMD1-201	26S proteasome non-ATPase regulatory subunit 1 [Sus scrofa]	XP_001925937.3
Chr15_135695908_135700357	Pig.08751	0.0585841	-4.09335	0.0421056	0.736623	yes	down	0.0134789	0.0615479	0.0216784	0	0	0	0.0322351	0	USP40-201	ubiquitin carboxyl-terminal hydrolase 40 isoform X1 [Sus scrofa]	XP_020931862.1
Chr15_25537906_25552485		10.1495	3.34334	0.0486167	0.746997	yes	up	0	0	0	0.027405	0	0	0	0.00913499	#N/A	#N/A	#N/A
Chr15_77452190_77454237	MSTRG.36790	0.0384795	-4.69977	0.0328509	0.665755	yes	down	0	0.184644	0	0	0	0	0.0615479	0	0	0	XP_001925033.2
Chr15_78580145_78637426	Pig.00183	0.101785	-3.29641	0.0330583	0.665755	yes	down	0	0	0.0433568	0	0	0	0.0144523	0	TLK1-201	serine/threonine-protein kinase tousled-like 1 isoform X1 [Sus scrofa]	XP_001927925.1
Chr15_78604943_78637426	Pig.00183	0.426463	-1.22951	0.00519214	0.292971	yes	down	0.107831	0.164128	0.303498	0.0479587	0.0594591	0.0823969	0.191819	0.0632716	TLK1-201	serine/threonine-protein kinase tousled-like 1 isoform X1 [Sus scrofa]	XP_001927925.1
Chr15_79969948_79977134	Pig.00171	0.037974	-4.71884	0.000729938	0.0823748	yes	down	0.0336973	0.0615479	0.0433568	0	0	0	0.0462007	0	PDK1-202	pyruvate dehydrogenase (acetyl-transferring) kinase isozyme 1, mitochondrial [Sus scrofa]	NP_001153080.1
Chr15_85761324_85761662	Pig.00129,MSTRG.36928	1748.35	10.7718	0.0122657	0.45636	yes	up	0	0	0.0216784	12.4145	17.6065	7.1136	0.00722614	12.3782	#N/A	#N/A	#N/A
Chr16_29597804_29638933	Pig.04517,MSTRG.38206	0.0705179	-3.82587	0.00503274	0.292059	yes	down	0.0336973	0.0273546	0.0144523	0	0	0	0.0251681	0	#N/A	#N/A	#N/A
Chr16_40041687_40063130	Pig.01158	0.191386	-2.38545	0.0229642	0.624749	yes	down	0.0471763	0.123096	0	0	0.0198197	0	0.0567573	0.00660657	ZSWIM5-201	zinc finger SWIM domain-containing protein 6 [Sus scrofa]	XP_020932632.1
Chr16_43972316_43991098	Pig.01172	0.0584611	-4.09638	0.0214827	0.595072	yes	down	0.0134789	0.0615479	0.0216784	0	0	0	0.0322351	0	GPBP1-202	vasculin isoform X1 [Sus scrofa]	XP_005672522.1
Chr16_45126671_45132955	Pig.01179	26.2467	4.71406	0.0380811	1	yes	up	0	0	0	0	0.0396394	0.034332	0	0.0246572	IL6ST-202	interleukin-6 receptor subunit beta isoform X2 [Sus scrofa]	XP_020932176.1
Chr16_53671468_53741947	Pig.01244,MSTRG.38604	0.0673342	-3.89252	0.0138469	0.495831	yes	down	0.0134789	0	0.050583	0	0	0	0.021354	0	#N/A	#N/A	#N/A
Chr16_56704855_56725231	Pig.01262	0.0586884	-4.09078	0.0290302	1	yes	down	0.0336973	0.0341933	0.0216784	0	0	0	0.0298563	0	EGFLAM-201	PREDICTED: pikachurin isoform X2 [Vicugna pacos]	XP_006207734.1
Chr16_57321264_57327791		4.30373	2.10559	0.0123743	0.45636	yes	up	0.0404368	0.0273546	0	0.0685124	0.0858854	0.0411985	0.0225971	0.0651988	#N/A	#N/A	#N/A
Chr16_6840714_6840849		2.5309	1.33965	0.049848	0.755656	yes	up	0.229142	0.0547092	0.0578091	0.315157	0.224623	0.0755305	0.113887	0.205104	#N/A	#N/A	#N/A
Chr16_6840714_6845508		2.44631	1.29061	0.00336933	0.263239	yes	up	2.2712	1.45663	0.802101	3.75448	2.23302	1.6754	1.50998	2.5543	#N/A	#N/A	#N/A
Chr16_6845373_6845508		2.10536	1.07407	0.0163005	0.5316	yes	up	1.35463	0.895863	0.476925	1.84984	1.05044	1.09176	0.90914	1.33068	#N/A	#N/A	#N/A
Chr17_22442613_22456965	Pig.08668	0.0621709	-4.00762	0.0333444	1	yes	down	0	0.0341933	0.0433568	0	0	0	0.02585	0	KIF16B	kinesin-like protein KIF16B isoform X7 [Sus scrofa]	XP_020933706.1
Chr18_12048850_12062657	Pig.01269	12.0029	3.58531	0.0239597	0.629309	yes	up	0	0	0	0	0.0132131	0.0205992	0	0.0112708	CREB3L2-202	cyclic AMP-responsive element-binding protein 3-like protein 2 [Sus scrofa]	XP_003134683.1
Chr18_31666003_31703354	Pig.01383	0.108684	-3.20179	0.00346911	0.263295	yes	down	0.0606552	0.0478706	0.0650352	0	0	0.0137328	0.0578537	0.00457761	MDFIC-201	myoD family inhibitor domain-containing protein isoform X1 [Sus scrofa]	XP_003134810.3
Chr18_41405196_41419587	Pig.07058	0.0681303	-3.87556	0.00357197	0.263295	yes	down	0.0269579	0.020516	0.0289045	0	0	0	0.0254595	0	AVL9-201	late secretory pathway protein AVL9 homolog isoform X2 [Sus scrofa]	XP_020934662.1
Chr18_55221402_55264445	Pig.17674	4.41533	2.14252	0.00888791	0.372701	yes	up	0.0202184	0.0478706	0	0.0616612	0.0528526	0.0823969	0.0226963	0.0656369	SUGCT-201	succinate--hydroxymethylglutarate CoA-transferase [Sus scrofa]	XP_020934311.1
ChrX_112727741_112741438	Pig.04480	0.0625627	-3.99855	0.00386394	0.272258	yes	down	0.0202184	0.0547092	0.0144523	0	0	0	0.0297933	0	HPRT1-201	hypoxanthine-guanine phosphoribosyltransferase isoform X1 [Sus scrofa]	XP_020935162.1
ChrX_11445105_11457569	Pig.06016	0.0902516	-3.4699	0.0146958	0.508843	yes	down	0.0336973	0.0273546	0	0	0	0	0.0203506	0	WWC3-201	protein WWC3 [Sus scrofa]	XP_013841331.2
ChrX_117725135_117726758	MSTRG.42462	0.303343	-1.72098	0.000651644	0.0763676	yes	down	0.188705	0.259869	0.274593	0.0479587	0.0726723	0.0411985	0.241056	0.0539431	0	0	TKC34226.1
ChrX_20814686_20820349	Pig.01772	0.0814975	-3.6171	0.0264955	0.629309	yes	down	0.0202184	0.0547092	0	0	0	0	0.0249759	0	BCLAF3-203	uncharacterized protein CXorf23 homolog isoform X2 [Sus scrofa]	XP_020936442.1
ChrX_24791587_24795340		0.454904	-1.13637	0.00573935	0.306804	yes	down	0.269579	0.198321	0.0867136	0.0822149	0.0396394	0.0549313	0.184871	0.0589285	#N/A	#N/A	#N/A
ChrX_32984351_33033861	Pig.01823	0.0478859	-4.38425	0.0185017	0.563745	yes	down	0.0202184	0.0136773	0.0578091	0	0	0	0.0305683	0	DMD-205	dystrophin isoform X1 [Sus scrofa]	XP_020935207.1
Scaffold196_757779_766655	Pig.14393	0.0676363	-3.88606	0.0163958	0.5316	yes	down	0.0336973	0.0547092	0	0	0	0	0.0294688	0	PTK2-202	focal adhesion kinase 1 isoform X4 [Sus scrofa]	XP_020944482.1
Scaffold288_845822_855512	Pig.17809	2.54244	1.34621	0.0117173	0.451933	yes	up	0.0404368	0.0547092	0.050583	0.0890662	0.0660657	0.109863	0.0485763	0.0883315	LAPTM4B-202	lysosomal-associated transmembrane protein 4B [Sus scrofa]	XP_005655413.3
Scaffold355_696928_702892	Pig.19342	19.5417	4.28849	0.0104385	1	yes	up	0	0	0	0.027405	0	0.0274656	0	0.0182902	NFYC-201	nuclear transcription factor Y subunit gamma isoform X1 [Sus scrofa]	XP_020952633.1
Scaffold419_205122_226753	Pig.20268	0.0591409	-4.0797	0.00471696	0.287452	yes	down	0.0202184	0.0615479	0.0144523	0	0	0	0.0320728	0	RNF216-201	E3 ubiquitin-protein ligase RNF216 isoform X2 [Sus scrofa]	XP_020941708.1
Scaffold419_234994_255861		0.0260638	-5.26181	0.000120647	0.0262579	yes	down	0.0876131	0.0478706	0.0578091	0	0	0	0.0644309	0	#N/A	#N/A	#N/A
