# Supplementary material for: Spatiotemporal Regulation of Circular RNA Expression During Ningxiang Pig Skeletal Muscle, Subcutaneous Fat, and Liver Development
Source: Research Square preprint supplement (doi:10.21203/rs.3.rs-111082/v1), 2020-11-20
Supplement: Supplementary file 4 [file b3bf5db5fac2d370d8e1d910.xls]

## Sheet: N30_F vs N90D_F_DEcircRNAs
circRNA id	Host gene id	FC(N90D_F/N30D_F)	Log2FC(N90D_F/N30D_F)	Pvalue	Padjust	Significant	Regulate	N30D_F1	N30D_F2	N30D_F3	N90D_F1	N90D_F2	N90D_F3	N30D_F	N90D_F	Host gene name	gene_name	description	nr_hit_name
Chr01_120321631_120333334	Pig.03428	5.23741	2.38885	0.0333172	0.355459	yes	up	0.0188742	0	0	0.0481265	0.118356	0.0709372	0.00629139	0.0791399	PIAS1-201	E3 SUMO-protein ligase PIAS1 [Sus scrofa]	XP_003121797.3
Chr01_127273916_127277963	Pig.14349	0.0509983	-4.29341	0.0180499	0.261908	yes	down	0	0.0153361	0.018584	0	0	0	0.0113067	0	ZNF106-201	zinc finger protein 106 isoform X1 [Sus scrofa]	XP_005659765.1
Chr01_129539644_129544125	MSTRG.1761,Pig.14306	0.377944	-1.40376	0.00485242	0.117711	yes	down	0.195033	0.222373	0.204424	0.220007	0.207123	0.118229	0.207277	0.181786	#N/A	#N/A	#N/A
Chr01_134753671_134762826	Pig.02309	0.0829889	-3.59094	0.0158883	0.240716	yes	down	0.031457	0.0230042	0.0619467	0	0	0.0236457	0.0388026	0.00788191	GABPB1-201	GA-binding protein subunit beta-1 isoform X1 [Sus scrofa]	XP_013848461.2
Chr01_134883950_134888642	MSTRG.1863,Pig.02307	0.0587172	-4.09007	0.00285017	0.0856465	yes	down	0.031457	0.0536764	0.0247787	0	0	0.0157638	0.0366373	0.00525461	#N/A	#N/A	#N/A
Chr01_134982805_135001147	Pig.02305	0.0140179	-6.15659	0.000154682	0.0100829	yes	down	0.0440398	0.0306722	0.0495574	0	0	0	0.0414231	0	TRPM7-201	transient receptor potential cation channel subfamily M member 7 isoform X1 [Sus scrofa]	XP_023989567.2
Chr01_134987666_135001147	Pig.02305	0.303559	-1.71995	5.41289e-07	0.000127414	yes	down	0.566225	0.5521	0.377875	0.426264	0.332876	0.291631	0.498733	0.350257	TRPM7-201	transient receptor potential cation channel subfamily M member 7 isoform X1 [Sus scrofa]	XP_023989567.2
Chr01_143206410_143210729	Pig.02254	2.49162	1.31708	1.15389e-07	3.49217e-05	yes	up	0.440398	0.498423	0.27876	2.37883	2.58904	2.04142	0.40586	2.33643	SLTM-201	SAFB-like transcription modulator isoform X2 [Sus scrofa]	XP_020929243.1
Chr01_150155875_150158392	Pig.02205	2.45204	1.29398	0.000340766	0.0176076	yes	up	0.138411	0.138025	0.123893	0.666896	0.821095	0.796073	0.133443	0.761355	WDR7-201	WD repeat-containing protein 7 isoform X1 [Sus scrofa]	XP_020949254.1
Chr01_151532417_151542472	Pig.02203	18.9841	4.24672	0.00296326	0.0875289	yes	up	0	0	0	0.0206257	0.110959	0.0315277	0	0.0543707	TCF4-206	transcription factor 4 isoform X1 [Sus scrofa]	XP_020949090.1
Chr01_155794327_155807734		0.474668	-1.07501	0.00109629	0.0422272	yes	down	0.188742	0.222373	0.216813	0.295634	0.258904	0.133993	0.20931	0.22951	#N/A	#N/A	#N/A
Chr01_162166054_162169510	Pig.08979	13.2344	3.72622	1.75464e-08	6.19534e-06	yes	up	0.0251656	0.0230042	0.0433627	0.93503	1.02822	0.890656	0.0305108	0.951301	SETBP1-201	SET-binding protein isoform X1 [Sus scrofa]	XP_013844009.2
Chr01_17284893_17285134	Pig.03920	0.0887203	-3.49459	0.0387039	0.37355	yes	down	0	0	0.018584	0	0	0	0.00619467	0	Tpm2	PREDICTED: tropomyosin beta chain isoform X4 [Loxodonta africana]	0
Chr01_176366641_176466186	Pig.00707	25.2122	4.65605	0.0156898	0.239992	yes	up	0	0	0	0.103128	0.0887671	0.0236457	0	0.071847	ME1-201	NADP-dependent malic enzyme [Sus scrofa]	XP_001924368.2
Chr01_176448874_176463214	Pig.00707	31.9589	4.99815	0.0134368	0.214837	yes	up	0	0	0	0.14438	0.0665753	0.0630553	0	0.0913367	ME1-201	NADP-dependent malic enzyme [Sus scrofa]	XP_001924368.2
Chr01_176448874_176466186	Pig.00707	735.536	9.52265	2.14678e-12	3.03196e-09	yes	up	0	0	0	2.73634	2.81835	0.7409	0	2.09853	ME1-201	NADP-dependent malic enzyme [Sus scrofa]	XP_001924368.2
Chr01_182096958_182103661	Pig.00734	7.10154	2.82813	0.0363711	0.369975	yes	up	0	0.0153361	0	0.0343761	0.140548	0.0551734	0.00511203	0.0766991	REV3L-201	DNA polymerase zeta catalytic subunit isoform X1 [Sus scrofa]	XP_020946897.1
Chr01_182281645_182282104	Pig.00736	16.3665	4.03267	0.00023248	0.0133111	yes	up	0	0.0153361	0	0.233757	0.103562	0.173402	0.00511203	0.17024	SLC16A10-202	monocarboxylate transporter 10 isoform X1 [Sus scrofa]	XP_020946871.1
Chr01_182642754_182716683	Pig.00740	0.343783	-1.54043	0.0386911	0.37355	yes	down	0.113245	0.0536764	0.055752	0.061877	0.029589	0.0867011	0.0742245	0.059389	CDK19-201	PREDICTED: cyclin-dependent kinase 19-like isoform X1 [Elephantulus edwardii]	XP_020946795.1
Chr01_184612953_184614388		0.43927	-1.18682	0.0319505	0.349546	yes	down	0.125828	0.0996847	0.148672	0.0825026	0.207123	0.094583	0.124728	0.12807	#N/A	#N/A	#N/A
Chr01_214379127_214383038		0.46253	-1.11238	0.000505982	0.0249284	yes	down	0.635431	0.283718	0.377875	0.556893	0.406849	0.425623	0.432341	0.463122	#N/A	#N/A	#N/A
Chr01_214380720_214383038		0.427475	-1.22609	8.14584e-05	0.00575232	yes	down	0.836755	0.483087	0.74336	0.893778	0.54	0.614789	0.687734	0.682856	#N/A	#N/A	#N/A
Chr01_225853573_225876920	Pig.04001	38.114	5.25225	0.00387817	0.103999	yes	up	0	0	0	0.061877	0.147945	0.118229	0	0.10935	ARHGAP18-201	rho GTPase-activating protein 18 isoform X4 [Sus scrofa]	XP_020944089.1
Chr01_225864275_225876920	Pig.04001	28.3249	4.824	0.0031861	0.0903854	yes	up	0	0	0	0.0756274	0.0813698	0.0867011	0	0.0812328	ARHGAP18-201	rho GTPase-activating protein 18 isoform X4 [Sus scrofa]	XP_020944089.1
Chr01_225868396_225876920	Pig.04001	12.5908	3.6543	0.0212278	0.289203	yes	up	0	0	0	0.061877	0.029589	0.0157638	0	0.0357433	ARHGAP18-201	rho GTPase-activating protein 18 isoform X4 [Sus scrofa]	XP_020944089.1
Chr01_239111391_239126201	Pig.05196	14.4966	3.85764	0.0315933	0.348614	yes	up	0	0	0	0.0481265	0.0369863	0.0394096	0	0.0415075	UTRN	utrophin isoform X4 [Sus scrofa]	XP_020927918.1
Chr01_239184899_239196493	Pig.05196	22.2399	4.47508	0.0186465	0.266905	yes	up	0	0	0	0.061877	0.0739725	0.0551734	0	0.0636743	UTRN	utrophin isoform X4 [Sus scrofa]	XP_020927918.1
Chr01_250407540_250490265	Pig.09625	0.0294681	-5.0847	0.0076607	0.153959	yes	down	0.0188742	0.0153361	0.0247787	0	0	0	0.019663	0	ARID1B-201	AT-rich interactive domain-containing protein 1B isoform X5 [Sus scrofa]	XP_020927546.1
Chr01_28732821_28737849		14.69	3.87676	0.0128827	0.209134	yes	up	0	0	0	0.0343761	0.029589	0.0630553	0	0.0423401	#N/A	#N/A	#N/A
Chr01_32467155_32487321	Pig.03310	8.44245	3.07766	0.0426902	0.393214	yes	up	0	0	0	0.0412513	0.0147945	0.0157638	0	0.0239365	CBWD1	COBW domain-containing protein 2 isoform X1 [Sus scrofa]	XP_001924427.4
Chr01_37930886_37959001	Pig.03277	0.274124	-1.8671	0.00322119	0.0903854	yes	down	0.22649	0.0460083	0.148672	0.0481265	0.110959	0.110347	0.14039	0.0898107	KIAA2026-201	uncharacterized protein KIAA2026 homolog isoform X1 [Sus scrofa]	XP_003121963.3
Chr01_47916059_47918028	Pig.03256	84.52	6.40122	1.88212e-06	0.000306713	yes	up	0	0	0	0.240633	0.303287	0.181284	0	0.241735	BNC2-202	zinc finger protein basonuclin-2 isoform X1 [Sus scrofa]	XP_020918949.1
Chr01_48784512_48796978	Pig.03254	0.167696	-2.57608	0.0119606	0.204342	yes	down	0.0440398	0.0383403	0.0309733	0.0206257	0	0.0236457	0.0377845	0.0147571	CNTLN-201	centlein isoform X1 [Sus scrofa]	XP_020918932.1
Chr01_69483410_69503247	Pig.05374	0.01427	-6.13087	9.57867e-05	0.00665325	yes	down	0.031457	0.0536764	0.037168	0	0	0	0.0407671	0	KTN1-207	kinectin [Sus scrofa]	NP_001245232.1
Chr01_69733082_69735508	Pig.05370	11.1534	3.47941	0.0380001	0.37355	yes	up	0	0	0	0.0412513	0	0.0551734	0	0.0321416	ATG14-201	beclin 1-associated autophagy-related key regulator [Sus scrofa]	XP_001925025.3
Chr01_72779231_72783251	Pig.02907	9.49847	3.24769	0.00140766	0.0505444	yes	up	0	0	0.0247787	0.165005	0.273698	0.141874	0.00825956	0.193526	NID2-201	nidogen-2 isoform X1 [Sus scrofa]	XP_020957573.1
Chr01_74523778_74537105	Pig.02889	17.4411	4.12442	0.0161843	0.244031	yes	up	0	0	0	0.0206257	0.059178	0.0709372	0	0.050247	SOS2-201	son of sevenless homolog 2 [Sus scrofa]	XP_020957098.1
Chr01_85074434_85093387		8.67431	3.11675	0.0304098	0.344509	yes	up	0	0	0	0.0137504	0.0147945	0.0472915	0	0.0252788	#N/A	#N/A	#N/A
Chr01_87757404_87763045	Pig.02840	9.45694	3.24137	0.0367014	0.369975	yes	up	0	0	0	0.0275009	0.0147945	0.0394096	0	0.027235	NOX5-201	NADPH oxidase 5 isoform X2 [Sus scrofa]	XP_020956203.1
Chr01_89715558_89717688	Pig.02822	38.557	5.26892	7.90559e-05	0.00567729	yes	up	0	0	0	0.123754	0.0665753	0.141874	0	0.110735	RUBCNL-201	protein RUBCNL-like isoform X1 [Sus scrofa]	XP_020921247.1
Chr02_10870704_10875081	Pig.14571	0.0462651	-4.43393	0.000753233	0.0340324	yes	down	0.0754967	0.0460083	0.018584	0	0	0.0157638	0.0466963	0.00525461	MATR3	PREDICTED: matrin-3-like isoform X1 [Lipotes vexillifer]	XP_013850634.1
Chr02_129529725_129544183	Pig.12557	0.321539	-1.63693	0.00596047	0.130852	yes	down	0.138411	0.0843486	0.074336	0.0756274	0.0443835	0.102465	0.0990318	0.0741586	QSER1-205	glutamine and serine-rich protein 1 [Sus scrofa]	XP_013849914.1
Chr02_129557508_129571492	Pig.12557	0.183271	-2.44795	0.036849	0.369975	yes	down	0.0125828	0.0306722	0.0433627	0	0.0221918	0.0157638	0.0288726	0.0126519	QSER1-205	glutamine and serine-rich protein 1 [Sus scrofa]	XP_013849914.1
Chr02_129618137_129623462	Pig.12558	0.297663	-1.74825	0.0378396	0.37355	yes	down	0.0880795	0.0536764	0.0619467	0.0412513	0.029589	0.0709372	0.0679009	0.0472592	DEPDC7-201	DEP domain-containing protein 7 [Sus scrofa]	XP_020938868.1
Chr02_13778027_13783009	Pig.14542	21.963	4.457	0.000909509	0.0385359	yes	up	0	0	0	0.0962531	0.059178	0.0315277	0	0.0623196	SMAD1-201	SMAD5 [Homo sapiens]	ELR59268.1
Chr02_13790063_13790633		2.84209	1.50695	0.00172011	0.0583048	yes	up	0.031457	0.0996847	0.0247787	0.323135	0.288493	0.386214	0.0519734	0.332614	#N/A	#N/A	#N/A
Chr02_138667128_138670999	Pig.12692	0.436962	-1.19442	0.0347941	0.362218	yes	down	0.0817881	0.161029	0.154867	0.123754	0.110959	0.173402	0.132561	0.136038	TTC17-201	tetratricopeptide repeat protein 17 isoform X1 [Sus scrofa]	XP_020938829.1
Chr02_141592909_141595750		0.274034	-1.86757	0.0194448	0.271906	yes	down	0.0188742	0.0383403	0.0681414	0.0206257	0.0443835	0.0157638	0.0417853	0.0269243	#N/A	#N/A	#N/A
Chr02_15132030_15165811	Pig.17377	23.6442	4.56341	0.00216573	0.0689941	yes	up	0	0	0	0.110003	0.029589	0.0630553	0	0.0675493	SEC24A-201	protein transport protein Sec24A [Sus scrofa]	NP_001230853.1
Chr02_152254104_152319280		0.0432753	-4.53031	8.32439e-09	3.34119e-06	yes	down	0.308278	0.23771	0.402653	0.0275009	0.0369863	0.0315277	0.316214	0.0320049	#N/A	#N/A	#N/A
Chr02_152289508_152324545		0.01075	-6.53952	0.0459085	0.410368	yes	down	0.0692053	0.0383403	0.055752	0	0	0	0.0544325	0	#N/A	#N/A	#N/A
Chr02_154177160_154177274		0.0148588	-6.07254	0.000770547	0.0343664	yes	down	0.031457	0.0613444	0.0247787	0	0	0	0.0391934	0	#N/A	#N/A	#N/A
Chr02_155120291_155121860	Pig.19962	19.884	4.31353	0.0145924	0.227309	yes	up	0	0	0	0.061877	0	0.110347	0	0.0574079	LOC101153177	PREDICTED: RNA-binding protein 4 isoform X1 [Canis lupus familiaris]	TKC36575.1
Chr02_155636386_155663230	Pig.20857	3.27623	1.71204	2.08903e-05	0.00215883	yes	up	0.0692053	0.0843486	0.09292	0.666896	0.769315	0.441387	0.082158	0.625866	Gstp1	glutathione S-transferase P-like isoform X1 [Sus scrofa]	XP_020938401.1
Chr02_156944449_156984195		0.146655	-2.7695	0.000284834	0.0156733	yes	down	0.157285	0.145693	0.408848	0.0481265	0.0887671	0.110347	0.237275	0.0824135	#N/A	#N/A	#N/A
Chr02_158152493_158154207	Pig.17122	0.225406	-2.14941	0.00622227	0.133324	yes	down	0.031457	0.0613444	0.0867254	0.0412513	0.029589	0.0236457	0.0598422	0.0314954	PPFIA1-201	liprin-alpha-1 isoform X8 [Sus scrofa]	XP_020938327.1
Chr02_159713586_159713781		0.019935	-5.64855	0.000556173	0.0270862	yes	down	0.0125828	0.0306722	0.0433627	0	0	0	0.0288726	0	#N/A	#N/A	#N/A
Chr02_159713586_159713945		0.0452327	-4.46649	0.0333997	0.355459	yes	down	0	0	0.037168	0	0	0	0.0123893	0	#N/A	#N/A	#N/A
Chr02_161584456_161587851	Pig.20939	6.43646	2.68627	0.0242536	0.306754	yes	up	0	0	0.0123893	0.0756274	0.0517808	0.0709372	0.00412978	0.0661151	EHMT2-201	histone-lysine N-methyltransferase EHMT1 isoform X3 [Sus scrofa]	XP_020936858.1
Chr02_161624907_161630872	Pig.20939	25.9038	4.69509	0.00461303	0.116342	yes	up	0	0	0	0.0412513	0.118356	0.0630553	0	0.0742209	EHMT2-201	histone-lysine N-methyltransferase EHMT1 isoform X3 [Sus scrofa]	XP_020936858.1
Chr02_162778048_162784074	Pig.21711	0.211172	-2.24351	3.3854e-10	2.39066e-07	yes	down	0.685762	0.759137	0.867254	0.453764	0.384657	0.299513	0.770718	0.379311	RXRA-201	retinoic acid receptor RXR-alpha isoform X2 [Sus scrofa]	XP_020927110.1
Chr02_170120249_170138243	Pig.10210	17.265	4.10978	0.037812	0.37355	yes	up	0	0	0	0.0481265	0.0221918	0.0788191	0	0.0497125	MVB12B-201	PREDICTED: multivesicular body subunit 12B [Camelus dromedarius]	XP_020924627.1
Chr02_170808813_170811931		3.2115	1.68325	0.0498886	0.430505	yes	up	0	0.0536764	0	0.151255	0.0961643	0.126111	0.0178921	0.12451	#N/A	#N/A	#N/A
Chr02_4961816_4965986	Pig.12013	2.93432	1.55303	0.000959831	0.0389589	yes	up	0.0377484	0.0306722	0.055752	0.309385	0.266301	0.283749	0.0413909	0.286478	PRELID2-202	PRELI domain-containing protein 2 isoform X1 [Sus scrofa]	XP_020940615.1
Chr02_49689591_49766895		14.6186	3.86973	0.0453803	0.409098	yes	up	0	0	0	0.0412513	0.029589	0.0551734	0	0.0420046	#N/A	#N/A	#N/A
Chr02_56247505_56259953	Pig.02459	9.41176	3.23446	0.0177305	0.259049	yes	up	0	0	0	0.0275009	0.029589	0.0236457	0	0.0269119	MEF2C-204	PREDICTED: myocyte-specific enhancer factor 2C isoform X2 [Sorex araneus]	XP_020937758.1
Chr02_60658293_60663530	Pig.02468	32.5346	5.02391	0.003204	0.0903854	yes	up	0	0	0	0.0412513	0.0517808	0.189166	0	0.094066	VCAN-201	versican core protein isoform X1 [Sus scrofa]	XP_020936732.1
Chr02_63049093_63075028	MSTRG.4434,Pig.02480	2.71863	1.44288	0.0485288	0.423951	yes	up	0.0125828	0.0153361	0.018584	0.103128	0.0665753	0.126111	0.015501	0.0986047	#N/A	#N/A	#N/A
Chr02_64288819_64310703	MSTRG.4458,MSTRG.4459,Pig.02491	0.335067	-1.57748	5.00957e-05	0.00408184	yes	down	0.257947	0.176365	0.161061	0.15813	0.16274	0.141874	0.198458	0.154248	#N/A	#N/A	#N/A
Chr02_64424585_64436763	Pig.02492,MSTRG.4458	0.0908378	-3.46056	0.0318153	0.349546	yes	down	0	0.0460083	0.0247787	0	0	0.0157638	0.0235957	0.00525461	#N/A	#N/A	#N/A
Chr02_64570850_64579384	MSTRG.4463,Pig.02493	0.0173599	-5.8481	0.0107497	0.195478	yes	down	0.0125828	0.0306722	0.055752	0	0	0	0.0330023	0	#N/A	#N/A	#N/A
Chr02_64735168_64749814	Pig.02496	0.308047	-1.69878	0.0300232	0.343493	yes	down	0.0503312	0.0613444	0.0619467	0.0481265	0.0369863	0.0394096	0.0578741	0.0415075	ARSB-202	arylsulfatase B isoform X1 [Sus scrofa]	XP_020940137.1
Chr02_70309759_70310360	Pig.02537	13.2111	3.72368	0.0214634	0.290545	yes	up	0	0	0	0	0.0517808	0.0630553	0	0.0382787	FCHO2-204	F-BAR domain only protein 2 isoform X1 [Sus scrofa]	XP_020940096.1
Chr02_80315127_80316205	Pig.12229	0.0289734	-5.10913	0.00142763	0.0508308	yes	down	0.0629139	0.0306722	0.117699	0.0137504	0	0	0.0704283	0.00458348	C3-201	complement C3 precursor [Sus scrofa]	XP_020936478.1
Chr02_80315888_80316205	Pig.12229	0.0196432	-5.66983	0.0419789	1	yes	down	0.0188742	0.0383403	0.0309733	0	0	0	0.0293959	0	C3-201	complement C3 precursor [Sus scrofa]	XP_020936478.1
Chr02_80316000_80316205	Pig.12229	0.00556816	-7.48858	0.00499062	0.117711	yes	down	0.113245	0.0766805	0.123893	0	0	0	0.104606	0	C3-201	complement C3 precursor [Sus scrofa]	XP_020936478.1
Chr02_84439685_84443541	Pig.16229	0.23247	-2.10488	0.00492779	0.117711	yes	down	0.195033	0.161029	0.0867254	0.0481265	0.0961643	0.094583	0.147596	0.0796246	Pm20d1	N-fatty-acyl-amino acid synthase/hydrolase PM20D1 isoform X1 [Sus scrofa]	XP_005654890.3
Chr02_92734565_92744854	MSTRG.5482	0.273041	-1.87281	0.000900597	0.0385359	yes	down	0.201325	0.115021	0.136283	0.116879	0.0369863	0.133993	0.150876	0.0959525	0	0	XP_020935332.1
Chr02_92989110_93068632	Pig.06424	3.62226e-08	-24.7185	1.90012e-05	0.00206431	yes	down	0	0	2.37875	0	0	0	0.792918	0	CYP4F8-201	cytochrome P450, family 4, subfamily F, polypeptide 55 isoform X3 [Sus scrofa]	XP_020935397.1
Chr02_95298630_95299695	Pig.06350	0.174071	-2.52225	1.50174e-06	0.000289221	yes	down	0.144702	0.145693	0.198229	0.061877	0.0665753	0.0709372	0.162875	0.0664632	MAST3-201	microtubule-associated serine/threonine-protein kinase 3 isoform X3 [Sus scrofa]	XP_020939140.1
Chr02_95718980_95719964	Pig.06334	10.0057	3.32274	0.0443567	0.40158	yes	up	0.0125828	0	0	0.061877	0.140548	0.094583	0.00419426	0.0990026	FKBP8-201	peptidyl-prolyl cis-trans isomerase FKBP8 isoform X1 [Sus scrofa]	XP_022353383.1
Chr02_9887702_9904656	MSTRG.3627,Pig.20189	18.8781	4.23864	0.0326423	1	yes	up	0	0	0	0.0412513	0.0813698	0.0394096	0	0.0540102	#N/A	#N/A	#N/A
Chr03_105960945_105982265	MSTRG.9694,Pig.17769	0.278396	-1.84479	0.0137999	0.21793	yes	down	0.0817881	0.0613444	0.0495574	0.0481265	0.0517808	0.0236457	0.06423	0.0411844	#N/A	#N/A	#N/A
Chr03_108726174_108760547	Pig.18781	19.8953	4.31435	0.036643	0.369975	yes	up	0	0	0	0.0275009	0.0961643	0.0472915	0	0.0569856	PARN-202	poly(A)-specific ribonuclease PARN isoform X1 [Sus scrofa]	XP_020942220.1(poly
Chr03_108839582_108909181		0.0230835	-5.43699	0.0118687	0.203593	yes	down	0	0.0306722	0.0433627	0	0	0	0.0246783	0	#N/A	#N/A	#N/A
Chr03_111561487_111577057	Pig.11639	3.46718	1.79376	0.031447	0.348614	yes	up	0	0	0.0433627	0.103128	0.103562	0.16552	0.0144542	0.12407	SMG1-201	serine/threonine-protein kinase SMG1 isoform X1 [Sus scrofa]	XP_020942206.1
Chr03_116800433_116800867	Pig.16768	9.38805	3.23083	2.71655e-10	2.39066e-07	yes	up	0.031457	0.0383403	0.018584	0.646271	0.643561	0.606907	0.0294604	0.632246	TNRC6C-202	trinucleotide repeat-containing gene 6A protein isoform X4 [Sus scrofa]	XP_020936978.1
Chr03_12146616_12147769	Pig.09373	28.0329	4.80905	0.00933593	0.178988	yes	up	0	0	0	0.0893778	0.103562	0.0472915	0	0.080077	FAM49A-201	protein FAM49A [Homo sapiens]	TKS34647.1
Chr03_126206126_126206928	Pig.21565	5.00489	2.32334	0.00517155	0.118566	yes	up	0.0125828	0	0.0247787	0.137504	0.177534	0.141874	0.0124538	0.152304	ZNF713-201	zinc finger protein 713 [Sus scrofa]	XP_003124511.4
Chr03_133654793_133664301	MSTRG.10349,Pig.09034	4.09802	2.03493	0.0109422	0.197286	yes	up	0.0188742	0.0383403	0.0309733	0.275009	0.288493	0.275867	0.0293959	0.27979	#N/A	#N/A	#N/A
Chr03_133654793_133680380	MSTRG.10349,Pig.09034	16.5835	4.05168	0.0326073	0.353343	yes	up	0	0	0	0.0893778	0.0517808	0	0	0.0470529	#N/A	#N/A	#N/A
Chr03_15934778_15934919	MSTRG.7784,Pig.09349	0.0137094	-6.18869	0.0488184	0.42473	yes	down	0.0503312	0.0153361	0.0619467	0	0	0	0.042538	0	#N/A	#N/A	#N/A
Chr03_30236813_30240250	Pig.06718	19.1071	4.25604	0.0217425	0.293385	yes	up	0	0	0	0.0343761	0.0517808	0.0788191	0	0.054992	EIF2AK2-201	interferon-induced, double-stranded RNA-activated protein kinase [Sus scrofa]	XP_020941521.1
Chr03_36236902_36243278	Pig.08272,MSTRG.8174	0.0671578	-3.8963	0.0331195	0.355459	yes	down	0	0	0.0247787	0	0	0	0.00825956	0	#N/A	#N/A	#N/A
Chr03_36704952_36705502		3.25568	1.70296	0.024932	0.309786	yes	up	0.0377484	0	0.018584	0.151255	0.184931	0.102465	0.0187775	0.146217	#N/A	#N/A	#N/A
Chr03_49988991_50015826	Pig.04812	35.1916	5.13716	0.00062753	0.0296639	yes	up	0	0	0	0.0825026	0.133151	0.0867011	0	0.100785	EHBP1-204	EH domain-binding protein 1 isoform X1 [Sus scrofa]	XP_020943128.1
Chr03_59785632_59813718	Pig.11488	0.176108	-2.50547	0.0484133	0.423816	yes	down	0.0440398	0.0536764	0.0433627	0.0275009	0.029589	0	0.0470263	0.01903	ALMS1-201	Alstrom syndrome protein 1 isoform X5 [Sus scrofa]	XP_005662521.1
Chr03_68915830_68927802	Pig.13937	0.0577808	-4.11327	0.0422482	0.390849	yes	down	0.0629139	0.0766805	0.018584	0.0206257	0	0	0.0527262	0.00687522	SUCLG1-203	succinate--CoA ligase [ADP/GDP-forming]	XP_020941544.1
Chr03_75183979_75196214	Pig.13452	0.338247	-1.56385	0.0423013	0.390849	yes	down	0.0880795	0.0383403	0.0433627	0.0343761	0.0443835	0.0551734	0.0565942	0.0446443	IL1R1-202	interleukin-1 receptor type 1 isoform X1 [Sus scrofa]	XP_013851373.2
Chr03_77822466_77840328	MSTRG.8700,Pig.09456	2.19005	1.13096	0.0292837	0.339003	yes	up	0.0566225	0.0383403	0.0247787	0.130629	0.258904	0.220694	0.0399138	0.203409	#N/A	#N/A	#N/A
Chr03_82908801_82914610	Pig.09375	10.0448	3.32838	0.0477516	0.420631	yes	up	0	0	0	0.0550017	0.0147945	0.0157638	0	0.02852	KCMF1-201	PREDICTED: E3 ubiquitin-protein ligase KCMF1 [Nannospalax galili]	NP_001069743.1
Chr03_89787538_89792287	Pig.09104	13.8992	3.79693	0.00228249	0.0716364	yes	up	0	0	0.0123893	0.123754	0.177534	0.126111	0.00412978	0.142466	CYP3A29-207	cytochrome P450 CYP3A [Sus scrofa]	ACG76385.1
Chr03_89817260_89879377	Pig.09104	2.11249e-11	-35.4623	5.20114e-08	1.69517e-05	yes	down	0.0188742	1.61029	1.23274	0	0	0	0.953968	0	CYP3A29-207	cytochrome P450 CYP3A [Sus scrofa]	ACG76385.1
Chr03_90754803_90755717		0.286231	-1.80475	0.022061	0.294487	yes	down	0.0440398	0.0766805	0.074336	0.0687522	0.0443835	0.0157638	0.0650188	0.0429665	#N/A	#N/A	#N/A
Chr03_93652036_93670231	Pig.09212	19.2127	4.26399	0.00517695	0.118566	yes	up	0	0	0	0.0206257	0.059178	0.0867011	0	0.0555016	BAZ1B-201	tyrosine-protein kinase BAZ1B [Sus scrofa]	XP_005662033.2
Chr03_96765182_96791365	Pig.10269,MSTRG.9426	15.714	3.97398	0.0281287	0.328664	yes	up	0	0	0	0.0206257	0.0443835	0.0709372	0	0.0453155	#N/A	#N/A	#N/A
Chr04_110101379_110134080	Pig.01698	0.411715	-1.28028	0.00663618	0.141294	yes	down	0.201325	0.145693	0.192035	0.14438	0.177534	0.197048	0.179684	0.172987	TLCD4-RWDD3	transmembrane protein 56 isoform X2 [Sus scrofa]	XP_020945824.1
Chr04_112432957_112478901	Pig.01720	0.107754	-3.21419	0.0164273	0.246817	yes	down	0.0251656	0.0230042	0.037168	0.0206257	0	0	0.0284459	0.00687522	EVI5-208	ecotropic viral integration site 5 protein homolog isoform X4 [Sus scrofa]	XP_020945870.1
Chr04_112634411_112648141	Pig.01723	5.407	2.43483	0.046369	0.412742	yes	up	0.0251656	0	0	0.0550017	0.16274	0.102465	0.00838853	0.106735	RPAP2-201	putative RNA polymerase II subunit B1 CTD phosphatase RPAP2 [Sus scrofa]	XP_003125954.2
Chr04_22743270_22773855	Pig.03771	0.363229	-1.46105	0.0281123	0.328664	yes	down	0.0943709	0.0613444	0.037168	0.0550017	0.0517808	0.0551734	0.0642944	0.0539853	EMC2-201	ER membrane protein complex subunit 2 isoform X4 [Sus scrofa]	XP_020944677.1
Chr04_28268052_28272728	MSTRG.10816,Pig.08101	0.376501	-1.40927	0.00721076	0.148311	yes	down	0.415232	0.291386	0.433627	0.247508	0.399452	0.354686	0.380082	0.333882	#N/A	#N/A	#N/A
Chr04_29129287_29153365	Pig.08103	2.89474	1.53343	0.00496001	0.117711	yes	up	0.0566225	0.0230042	0.037168	0.261258	0.251507	0.283749	0.0389316	0.265505	ZFPM2-204	zinc finger protein ZFPM2 [Sus scrofa]	NP_001182303.1
Chr04_30299278_30309026	Pig.08107	72.9265	6.18837	7.346e-06	0.000943182	yes	up	0	0	0	0.17188	0.281096	0.173402	0	0.208793	OXR1-205	oxidation resistance protein 1 isoform X4 [Sus scrofa]	XP_013852007.1
Chr04_30299278_30328758	Pig.08107	15.7177	3.97432	0.0199422	0.277034	yes	up	0	0	0	0.0275009	0.0221918	0.0867011	0	0.0454646	OXR1-205	oxidation resistance protein 1 isoform X4 [Sus scrofa]	XP_013852007.1
Chr04_4037434_4061942	Pig.13340	12.1714	3.60543	0.0339343	0.357145	yes	up	0	0	0	0.0206257	0.029589	0.0551734	0	0.0351294	ASAP1-201	arf-GAP with SH3 domain, ANK repeat and PH domain-containing protein 1 isoform X1 [Sus scrofa]	XP_020944565.1
Chr04_4049704_4061942	Pig.13340	4.45251	2.15462	0.000306094	0.0164167	yes	up	0.031457	0.0230042	0.055752	0.309385	0.443835	0.40986	0.0367377	0.387693	ASAP1-201	arf-GAP with SH3 domain, ANK repeat and PH domain-containing protein 1 isoform X1 [Sus scrofa]	XP_020944565.1
Chr04_42637595_42638483	Pig.01470	3.49523	1.80539	0.0483716	0.423816	yes	up	0.0188742	0	0.0123893	0.0962531	0.0739725	0.094583	0.0104212	0.0882695	ZBTB10-201	zinc finger and BTB domain-containing protein 10 isoform X1 [Sus scrofa]	XP_001928312.1
Chr04_58498565_58501388	Pig.14062,MSTRG.11105	5.46381	2.44991	4.27963e-09	2.01476e-06	yes	up	0.100662	0.0536764	0.0495574	0.715023	1.10219	0.78031	0.0679653	0.865841	#N/A	#N/A	#N/A
Chr04_58547233_58562535	Pig.14062,MSTRG.11105	15.6466	3.96777	0.00396935	0.105392	yes	up	0.0125828	0	0	0.151255	0.16274	0.157638	0.00419426	0.157211	#N/A	#N/A	#N/A
Chr04_64703098_64703528		29.7837	4.89645	0.000204989	0.0126258	yes	up	0	0	0	0.103128	0.0887671	0.0630553	0	0.0849835	#N/A	#N/A	#N/A
Chr04_77070685_77073952	Pig.10646,MSTRG.11434,MSTRG.11433	0.265645	-1.91243	0.024576	0.308661	yes	down	0.106954	0.0843486	0.037168	0.0412513	0.059178	0.0394096	0.0761568	0.046613	#N/A	#N/A	#N/A
Chr04_80611471_80622183	Pig.10548	0.39363	-1.34509	0.00729591	0.148619	yes	down	0.169868	0.0460083	0.0805307	0.0962531	0.0739725	0.102465	0.0988022	0.0908968	CCT3-202	T-complex protein 1 subunit gamma [Sus scrofa]	NP_001231109.1
Chr04_81182357_81276967		0.0434162	-4.52562	0.0116144	0.200857	yes	down	0.0125828	0.0153361	0.0123893	0	0	0	0.0134361	0	#N/A	#N/A	#N/A
Chr04_9772083_9785803		0.251827	-1.98949	0.00988766	0.185907	yes	down	0.0943709	0.0383403	0.0433627	0.0412513	0.0221918	0.0394096	0.0586913	0.0342842	#N/A	#N/A	#N/A
Chr05_100664210_100668705	Pig.11743	0.456693	-1.1307	0.0155972	0.23944	yes	down	0.232782	0.153361	0.123893	0.137504	0.229315	0.173402	0.170012	0.180074	PAWR-201	PREDICTED: PRKC apoptosis WT1 regulator protein [Felis catus]	XP_020948471.1
Chr05_104214626_104274170	MSTRG.14747	0.248801	-2.00694	0.0438416	0.39862	yes	down	0.0817881	0.0920166	0.09292	0.0481265	0.0517808	0.0551734	0.0889083	0.0516936	0	0	XP_020947997.1
Chr05_104253525_104274170	MSTRG.14747	0.344583	-1.53708	0.0430946	0.394905	yes	down	0.239073	0.153361	0.111504	0.178756	0.110959	0.110347	0.167979	0.133354	0	0	XP_020947997.1
Chr05_104505741_104506134	Pig.13247	2.92119	1.54656	0.01236	0.20537	yes	up	0.0692053	0.0383403	0	0.288759	0.170137	0.260103	0.0358485	0.239666	LRP6-201	LOW QUALITY PROTEIN: low-density lipoprotein receptor-related protein 6 [Sus scrofa]	XP_020948003.1
Chr05_104558652_104586660	Pig.13247	15.0086	3.90772	0.00310385	0.0896406	yes	up	0.0125828	0	0	0.103128	0.155342	0.197048	0.00419426	0.151839	LRP6-201	LOW QUALITY PROTEIN: low-density lipoprotein receptor-related protein 6 [Sus scrofa]	XP_020948003.1
Chr05_106667069_106690377	Pig.13290,MSTRG.14805	0.154203	-2.6971	0.0396013	0.379617	yes	down	0.0880795	0.0536764	0.130088	0.0206257	0	0.0788191	0.0906146	0.0331483	#N/A	#N/A	#N/A
Chr05_106696908_106702791	Pig.13290,MSTRG.14805	0.172	-2.53952	0.0433528	0.395764	yes	down	0.138411	0.122689	0.037168	0.0481265	0	0.0709372	0.0994225	0.0396879	#N/A	#N/A	#N/A
Chr05_11188042_11212141	Pig.07621	0.119555	-3.06425	0.0408568	0.384689	yes	down	0.0251656	0.0536764	0.0495574	0.0206257	0.0147945	0	0.0427998	0.0118067	LARP4-202	la-related protein 4 isoform X1 [Sus scrofa]	XP_020947303.1
Chr05_11194767_11207749	Pig.07621	0.261059	-1.93755	0.0213806	0.290352	yes	down	0.0817881	0.0613444	0.0805307	0	0.0517808	0.0867011	0.0745544	0.0461606	LARP4-202	la-related protein 4 isoform X1 [Sus scrofa]	XP_020947303.1
Chr05_20526478_20543229	Pig.19106	3.02001	1.59455	0.000227992	0.0133111	yes	up	0.0817881	0.130357	0.142477	0.873153	0.924657	0.70149	0.118207	0.8331	TBC1D22A-201	LOW QUALITY PROTEIN: TBC1 domain family member 22A [Sus scrofa]	XP_020947020.1
Chr05_20526478_20580658	Pig.19106	2.71943	1.4433	0.0264296	0.319306	yes	up	0.031457	0.0460083	0.0123893	0.137504	0.21452	0.20493	0.0299515	0.185652	TBC1D22A-201	LOW QUALITY PROTEIN: TBC1 domain family member 22A [Sus scrofa]	XP_020947020.1
Chr05_20526478_20598492	Pig.19106	30.861	4.94771	0.000236244	0.0133462	yes	up	0	0	0	0.0825026	0.0961643	0.0867011	0	0.088456	TBC1D22A-201	LOW QUALITY PROTEIN: TBC1 domain family member 22A [Sus scrofa]	XP_020947020.1
Chr05_20526478_20617636	Pig.19106	7.89807	2.9815	0.0306163	0.345745	yes	up	0	0	0.0123893	0.0825026	0.0961643	0.0630553	0.00412978	0.0805741	TBC1D22A-201	LOW QUALITY PROTEIN: TBC1 domain family member 22A [Sus scrofa]	XP_020947020.1
Chr05_21492507_21494054	Pig.14005	0.0773842	-3.69182	0.0123436	0.20537	yes	down	0.339735	0.23771	0.0619467	0.0206257	0	0.094583	0.213131	0.0384029	PPARA-201	peroxisome proliferator-activated receptor alpha [Sus scrofa]	NP_001037991.1
Chr05_28687240_28690035		0.180957	-2.46628	0.0083449	0.163691	yes	down	0.0943709	0.0460083	0.105309	0.0275009	0.029589	0.0472915	0.0818962	0.0347938	#N/A	#N/A	#N/A
Chr05_31319211_31326900	Pig.05460	10.0918	3.33512	0.0384492	0.37355	yes	up	0	0	0	0.0412513	0.0443835	0	0	0.0285449	XPOT-201	exportin-T isoform X1 [Sus scrofa]	XP_020947599.1
Chr05_32183948_32204945		14.7642	3.88403	0.0110298	0.198023	yes	up	0	0	0	0.0275009	0.029589	0.0709372	0	0.0426757	#N/A	#N/A	#N/A
Chr05_43684815_43744217	Pig.06613	0.118509	-3.07693	2.48851e-05	0.00234307	yes	down	0.0629139	0.0920166	0.111504	0.0137504	0.0369863	0.0236457	0.0888115	0.0247942	FGD4	FYVE, RhoGEF and PH domain-containing protein 4 isoform X1 [Sus scrofa]	XP_020947725.1
Chr05_43729794_43744217	Pig.06613	0.11001	-3.1843	0.0123598	0.20537	yes	down	0.0440398	0.0536764	0.0433627	0.0206257	0.0147945	0	0.0470263	0.0118067	FGD4	FYVE, RhoGEF and PH domain-containing protein 4 isoform X1 [Sus scrofa]	XP_020947725.1
Chr05_4770639_4793901	Pig.17058	5.08359	2.34585	0.0483268	0.423816	yes	up	0	0.0153361	0	0.0687522	0.059178	0.0315277	0.00511203	0.0531526	RBFOX2-202	RNA binding protein fox-1 homolog 2 isoform X11 [Sus scrofa]	XP_024599261.1
Chr05_48391369_48407553	Pig.06589	68.6203	6.10056	1.08998e-05	0.0013583	yes	up	0	0	0	0.165005	0.258904	0.16552	0	0.196476	ARNTL2-201	aryl hydrocarbon receptor nuclear translocator-like protein 2 isoform X1 [Sus scrofa]	XP_020947810.1
Chr05_48391369_48424370	Pig.06589	22.2272	4.47425	0.0122378	0.20537	yes	up	0	0	0	0.0550017	0.0961643	0.0394096	0	0.0635252	ARNTL2-201	aryl hydrocarbon receptor nuclear translocator-like protein 2 isoform X1 [Sus scrofa]	XP_020947810.1
Chr05_54141653_54170120	MSTRG.13889,Pig.09598	0.297365	-1.74969	0.0188332	0.266905	yes	down	0.100662	0.0536764	0.111504	0.0481265	0.0739725	0.0630553	0.0886142	0.0617181	#N/A	#N/A	#N/A
Chr05_65803355_65828340		0.0108344	-6.52824	0.00150392	0.0526622	yes	down	0.0943709	0.0383403	0.0309733	0	0	0	0.0545615	0	#N/A	#N/A	#N/A
Chr05_66006614_66013845	Pig.07499	9.37248	3.22843	0.00766705	0.153959	yes	up	0.0188742	0	0	0.0550017	0.147945	0.220694	0.00629139	0.141213	KDM5A-201	lysine-specific demethylase 5A [Sus scrofa]	XP_020948145.1
Chr05_66635943_66647337	Pig.07503	0.222404	-2.16875	0.00976659	0.185565	yes	down	0.0817881	0.0996847	0.0495574	0.0275009	0.029589	0.0630553	0.07701	0.0400484	ERC1-203	ELKS/Rab6-interacting/CAST family member 1 isoform X3 [Sus scrofa]	XP_020948632.1
Chr05_66635943_66654569	Pig.07503	0.298522	-1.74409	0.00119521	0.0451541	yes	down	0.132119	0.245378	0.123893	0.110003	0.0739725	0.16552	0.16713	0.116499	ERC1-203	ELKS/Rab6-interacting/CAST family member 1 isoform X3 [Sus scrofa]	XP_020948632.1
Chr05_66678018_66707603	Pig.07503	0.240736	-2.05448	0.0117311	0.202052	yes	down	0.0251656	0.0766805	0.055752	0.0343761	0.0147945	0.0394096	0.0525327	0.0295267	ERC1-203	ELKS/Rab6-interacting/CAST family member 1 isoform X3 [Sus scrofa]	XP_020948632.1
Chr05_68026189_68027246	Pig.07513	7.12243	2.83237	0.00498996	0.117711	yes	up	0.0188742	0	0	0.0962531	0.0887671	0.141874	0.00629139	0.108965	CECR2-201	LOW QUALITY PROTEIN: cat eye syndrome critical region protein 2 [Sus scrofa]	XP_020948162.1
Chr05_72050161_72071860	Pig.07534	3.51836	1.8149	0.00334192	0.0919463	yes	up	0.0188742	0.0153361	0.0495574	0.226882	0.147945	0.33104	0.0279225	0.235289	PPHLN1-201	periphilin-1 isoform X1 [Sus scrofa]	XP_020948207.1
Chr05_75269998_75283400		9.4451	3.23957	0.0267699	0.321125	yes	up	0	0	0	0.0206257	0.0369863	0.0236457	0	0.0270859	#N/A	#N/A	#N/A
Chr05_78188886_78207469	Pig.13110	0.285286	-1.80952	0.0388553	0.374159	yes	down	0.132119	0.0843486	0.0433627	0.0275009	0.0961643	0.0472915	0.0866102	0.0569856	SLC41A2-201	LOW QUALITY PROTEIN: solute carrier family 41 member 2 [Sus scrofa]	XP_005664240.2
Chr05_80967616_80976108	Pig.04041	9.59772	3.26269	0.0147127	0.228343	yes	up	0.0125828	0	0	0.0825026	0.0517808	0.157638	0.00419426	0.0973072	WASHC3-203	WASH complex subunit 3 isoform X1 [Sus scrofa]	XP_020948336.1
Chr05_81215241_81234546	Pig.04043	4.51928	2.17609	0.0302948	0.344257	yes	up	0.0125828	0	0.0123893	0.061877	0.110959	0.102465	0.00832404	0.0917669	GNPTAB-201	N-acetylglucosamine-1-phosphotransferase subunits alpha/beta isoform X6 [Sus scrofa]	XP_020948331.1
Chr05_84175407_84176240	MSTRG.14449,Pig.04063	0.447685	-1.15944	0.0234274	0.299885	yes	down	0.144702	0.130357	0.142477	0.220007	0.125753	0.0867011	0.139179	0.144154	#N/A	#N/A	#N/A
Chr05_99164719_99181403	MSTRG.14656,Pig.11752	0.455529	-1.13438	0.0250809	0.309818	yes	down	0.220199	0.130357	0.179645	0.247508	0.155342	0.157638	0.176734	0.18683	#N/A	#N/A	#N/A
Chr06_108820298_108820413	Pig.16623	0.0182857	-5.77314	2.90181e-10	2.39066e-07	yes	down	0.327153	0.207037	0.322123	0.0206257	0.0147945	0	0.285438	0.0118067	A1BG	alpha-1B-glycoprotein [Sus scrofa]	XP_003128180.1
Chr06_11538093_11556397		18.7666	4.23009	0.00480183	0.117711	yes	up	0	0	0	0.0687522	0.029589	0.0630553	0	0.0537988	#N/A	#N/A	#N/A
Chr06_117850632_117851180	MSTRG.17397,Pig.20055	0.428912	-1.22125	0.0468854	0.415955	yes	down	0.0251656	0.122689	0.136283	0.0962531	0.110959	0.0788191	0.0947124	0.0953437	#N/A	#N/A	#N/A
Chr06_119254850_119273969	MSTRG.17506	17.0358	4.0905	0.0247687	0.308661	yes	up	0	0	0	0.0550017	0.0517808	0.0394096	0	0.0487307	0	0	XP_020950281.1
Chr06_125971884_125972374	Pig.16043	11.8826	3.57078	0.024679	0.308661	yes	up	0	0	0	0.0481265	0.0221918	0.0315277	0	0.0339487	ZNF568	PREDICTED: zinc finger protein 568-like isoform X1 [Balaenoptera acutorostrata scammoni]	XP_020952805.1
Chr06_127927287_127934404	Pig.15970	12.4124	3.63372	0.0315949	0.348614	yes	up	0	0	0	0.0756274	0.029589	0	0	0.0350721	UBA2	PREDICTED: SUMO-activating enzyme subunit 2 [Vicugna pacos]	XP_006217089.1
Chr06_134499265_134501848	MSTRG.18159,Pig.13993	9.40573	3.23354	0.0360221	0.369896	yes	up	0	0	0	0.0275009	0.029589	0.0236457	0	0.0269119	#N/A	#N/A	#N/A
Chr06_137020965_137029577	Pig.15005	15.6414	3.9673	0.00925746	0.17829	yes	up	0	0	0	0.0343761	0.0147945	0.0867011	0	0.0452906	HEATR3-201	HEAT repeat-containing protein 3 isoform X1 [Sus scrofa]	XP_020949878.1
Chr06_139797251_139798870	MSTRG.18233	0.363788	-1.45883	0.00471119	0.11742	yes	down	0.207616	0.115021	0.142477	0.192506	0.0961643	0.102465	0.155038	0.130378	0	0	XP_020949833.1
Chr06_14381044_14387920	Pig.12451	0.109445	-3.19173	0.0111356	0.198158	yes	down	0.0629139	0.122689	0.0495574	0.0137504	0	0.0472915	0.0783867	0.0203473	FYB2-201	activation-dependent, raft-recruited ADAP-like phosphoprotein isoform X1 [Sus scrofa]	XP_020952236.1
Chr06_14477450_14494363	MSTRG.15243	0.281897	-1.82676	0.0195415	0.27236	yes	down	0.320861	0.245378	0.266371	0.103128	0.192329	0.252221	0.277536	0.182559	0	0	NP_001090919.2
Chr06_153142885_153154959		0.10169	-3.29775	0.0168928	0.250952	yes	down	0.0125828	0.0306722	0.018584	0.0137504	0	0	0.020613	0.00458348	#N/A	#N/A	#N/A
Chr06_160725112_160742417	Pig.15713	0.349837	-1.51524	0.0274544	0.324023	yes	down	0.0566225	0.0383403	0.055752	0.0756274	0.0221918	0.0236457	0.0502383	0.0404883	CFDP1-201	craniofacial development protein 1 [Sus scrofa]	XP_020949434.1
Chr06_18963288_18963405	Pig.15147	0.00989532	-6.65904	0.0281396	0.328664	yes	down	0.0629139	0.0766805	0.037168	0	0	0	0.0589208	0	NFIA-201	nuclear factor 1 A-type isoform X1 [Sus scrofa]	XP_020953438.1
Chr06_40368775_40376408		29.8464	4.89948	0.000198415	0.0125475	yes	up	0	0	0	0.110003	0.0517808	0.094583	0	0.0854558	#N/A	#N/A	#N/A
Chr06_40375921_40376408		24.1223	4.59229	0.000822681	0.0363094	yes	up	0	0	0	0.0481265	0.0887671	0.0709372	0	0.0692769	#N/A	#N/A	#N/A
Chr06_49238260_49238933	Pig.02789	16.5647	4.05004	6.81689e-10	4.12617e-07	yes	up	0	0.0306722	0.037168	0.825026	0.983835	0.796073	0.0226134	0.868311	KIAA1328-202	protein hinderin isoform X5 [Sus scrofa]	XP_020951945.1
Chr06_49667205_49680000	Pig.02792	9.3141	3.21942	0.0300769	0.343493	yes	up	0	0	0	0.0481265	0	0.0315277	0	0.0265514	FHOD3-206	FH1/FH2 domain-containing protein 3 isoform X2 [Sus scrofa]	XP_020951933.1
Chr06_54767318_54781593	Pig.03600	23.2622	4.53992	0.00549488	0.123839	yes	up	0	0	0	0.0550017	0.0665753	0.0788191	0	0.0667987	B4GALT6-201	beta-1,4-galactosyltransferase 6 [Sus scrofa]	XP_003127934.2
Chr06_54767318_54808170	Pig.03600	20.5036	4.3578	0.0229113	0.298157	yes	up	0	0	0	0.0412513	0.118356	0.0157638	0	0.0584571	B4GALT6-201	beta-1,4-galactosyltransferase 6 [Sus scrofa]	XP_003127934.2
Chr06_59635446_59640281	Pig.03617	4.36507	2.126	0.0457736	0.410173	yes	up	0.0251656	0	0	0.130629	0.0665753	0.0630553	0.00838853	0.0867533	SS18-203	PREDICTED: protein SSXT [Otolemur garnettii]	XP_004742918.1
Chr06_61228450_61283077	MSTRG.15623,Pig.03622	2.53576	1.34242	0.0340274	0.357145	yes	up	0.031457	0.0383403	0.018584	0.192506	0.140548	0.181284	0.0294604	0.171446	#N/A	#N/A	#N/A
Chr06_61490852_61503632	Pig.03624	0.338643	-1.56216	0.0457899	0.410173	yes	down	0.188742	0.168697	0.0867254	0.178756	0.0887671	0.0788191	0.148055	0.115447	TTC39C-202	tetratricopeptide repeat protein 39C isoform X1 [Sus scrofa]	XP_003356432.3
Chr06_66582027_66583197	Pig.03664	2.22145	1.1515	0.0407084	0.384146	yes	up	0.0629139	0	0.055752	0.206257	0.21452	0.212812	0.0395553	0.211196	SMCHD1-201	structural maintenance of chromosomes flexible hinge domain-containing protein 1 isoform X1 [Sus scrofa]	XP_020951796.1
Chr06_71786235_71807159	Pig.03687	0.0434229	-4.5254	0.0106958	0.195478	yes	down	0.0125828	0.0153361	0.0123893	0	0	0	0.0134361	0	ANKRD12-201	ankyrin repeat domain-containing protein 12 isoform X1 [Sus scrofa]	XP_020951722.1
Chr06_72055229_72057078	Pig.03690	2.21304	1.14603	0.0112712	0.198158	yes	up	0.0692053	0.0383403	0.0433627	0.247508	0.229315	0.307395	0.0503028	0.261406	PPP4R1-201	serine/threonine-protein phosphatase 4 regulatory subunit 1 isoform X1 [Sus scrofa]	XP_020951717.1
Chr06_82248210_82252053		17.4355	4.12396	0.0114581	0.19924	yes	up	0	0	0	0.0412513	0	0.110347	0	0.0505327	#N/A	#N/A	#N/A
Chr06_86668446_86672730	Pig.03134	0.355973	-1.49016	2.0127e-06	0.000315844	yes	down	0.346027	0.337394	0.291149	0.31626	0.258904	0.228576	0.324857	0.267913	ARID1A-201	AT-rich interactive domain-containing protein 1A isoform X1 [Sus scrofa]	XP_020951289.1
Chr06_96048045_96062663	Pig.08606	0.435051	-1.20074	0.0339668	0.357145	yes	down	0.176159	0.107353	0.223008	0.137504	0.258904	0.118229	0.16884	0.171546	DDI1-201	PREDICTED: protein DDI1 homolog 2 isoform X2 [Orcinus orca]	XP_012389449.1
Chr06_96055937_96062663	Pig.08606	0.167392	-2.5787	0.0361156	0.369896	yes	down	0.0377484	0.0460083	0.0123893	0	0.0369863	0	0.0320487	0.0123288	DDI1-201	PREDICTED: protein DDI1 homolog 2 isoform X2 [Orcinus orca]	XP_012389449.1
Chr06_9953190_9955184	Pig.14721	20.2148	4.33734	0.0208862	0.286211	yes	up	0	0	0	0.0137504	0.0665753	0.094583	0	0.0583029	TUT4-202	terminal uridylyltransferase 4 isoform X4 [Sus scrofa]	XP_020952296.1
Chr07_104353059_104373328		0.358706	-1.47913	0.0384284	0.37355	yes	down	0.0692053	0.0460083	0.111504	0.061877	0.0739725	0.0551734	0.0755726	0.0636743	#N/A	#N/A	#N/A
Chr07_109969272_109992959	Pig.09261	73.9529	6.20853	0.000205612	0.0126258	yes	up	0	0	0	0.0962531	0.288493	0.252221	0	0.212322	ADGRF5-201	LOW QUALITY PROTEIN: adhesion G protein-coupled receptor F5 [Sus scrofa]	XP_013833469.2
Chr07_120147855_120151102	Pig.13544	0.0402333	-4.63546	0.0384738	0.37355	yes	down	0	0.0306722	0.0123893	0	0	0	0.0143538	0	SRPK1-201	SRSF protein kinase 1 [Sus scrofa]	NP_001137585.1
Chr07_125113842_125133389	Pig.13357	12.7362	3.67086	0.00496483	0.117711	yes	up	0	0	0	0.0687522	0	0.0394096	0	0.0360539	MLIP-201	muscular LMNA-interacting protein isoform X3 [Sus scrofa]	XP_020954178.1
Chr07_125133345_125157395	Pig.13357	15.3305	3.93833	0.00427054	0.111008	yes	up	0	0	0	0.0481265	0.059178	0.0236457	0	0.0436501	MLIP-201	muscular LMNA-interacting protein isoform X3 [Sus scrofa]	XP_020954178.1
Chr07_127317226_127328596	Pig.11473	78.3328	6.29154	1.33682e-05	0.00157336	yes	up	0	0	0	0.103128	0.288493	0.283749	0	0.225123	Tnxb	tenascin-X isoform X5 [Sus scrofa]	XP_020953995.1
Chr07_13231702_13255523	Pig.06798,MSTRG.19302	30.5396	4.93261	0.000755026	0.0340324	yes	up	0	0	0	0.0206257	0.140548	0.102465	0	0.0878795	#N/A	#N/A	#N/A
Chr07_23444137_23455147	Pig.19585	3.2131	1.68397	0.00331251	0.0917846	yes	up	0.0251656	0.0536764	0.0123893	0.206257	0.16274	0.291631	0.0304104	0.220209	TUBB2B-205	Tubulin beta-2A chain [Fukomys damarensis]	XP_025838410.1
Chr07_27538055_27538693	Pig.18233	8.61411	3.1067	0.0233061	0.299236	yes	up	0.0125828	0	0	0.0481265	0.133151	0.0788191	0.00419426	0.0866988	EIF5	PREDICTED: eukaryotic translation initiation factor 5 isoform X1 [Myotis lucifugus]	XP_015455206.1
Chr07_35429135_35449112	MSTRG.19801	1.77682e-13	-42.3558	1.20149e-36	5.09072e-33	yes	down	6.33543	4.90755	4.80706	0	0	0	5.35002	0	0	0	XP_001928879.1
Chr07_35448459_35546999		0.0411935	-4.60144	8.67433e-09	3.34119e-06	yes	down	12.9414	17.9969	14.4274	1.45755	0.399452	2.53798	15.1219	1.46499	#N/A	#N/A	#N/A
Chr07_36723571_36725562		9.91514	3.30963	1.70873e-09	9.04986e-07	yes	up	0.0503312	0	0.0123893	0.495016	0.392055	0.630553	0.0209068	0.505874	#N/A	#N/A	#N/A
Chr07_65935765_65977597	MSTRG.20331,Pig.04276	0.14588	-2.77714	2.90212e-05	0.00257807	yes	down	0.0629139	0.0920166	0.123893	0.0412513	0.0221918	0.0315277	0.0929413	0.0316569	#N/A	#N/A	#N/A
Chr07_85427777_85452842	Pig.08415	0.0564594	-4.14664	0.036607	0.369975	yes	down	0.031457	0	0	0	0	0	0.0104857	0	STRN-201	striatin-3 isoform X1 [Sus scrofa]	XP_020955544.1
Chr07_85797913_85806784		2.2242	1.15328	0.0194258	0.271906	yes	up	0.031457	0.0460083	0.055752	0.165005	0.199726	0.33104	0.0444058	0.231924	#N/A	#N/A	#N/A
Chr07_88762220_88762547	Pig.08431	2.06768	1.04801	0.00374039	0.100943	yes	up	0.132119	0.0460083	0.123893	0.481265	0.554794	0.441387	0.100674	0.492482	SNX6-202	sorting nexin-6 [Sus scrofa]	NP_001231145.1
Chr07_89693469_89694186	Pig.08443	23.662	4.5645	0.00069868	0.0321773	yes	up	0	0	0	0.103128	0.059178	0.0394096	0	0.0672386	RALGAPA1-201	ral GTPase-activating protein subunit alpha-1 isoform X7 [Sus scrofa]	XP_020954818.1
Chr07_91237131_91288827		0.103535	-3.27181	0.0295371	0.340078	yes	down	0.0125828	0.0383403	0.037168	0.0206257	0	0	0.0293637	0.00687522	#N/A	#N/A	#N/A
Chr07_95086666_95104859	MSTRG.20849	0.357788	-1.48282	0.00273258	0.0826996	yes	down	0.100662	0.0690125	0.111504	0.0687522	0.0887671	0.0788191	0.0937263	0.0787795	0	0	XP_001927907.1
Chr07_97598783_97651052		14.4961	3.8576	0.00606305	0.131882	yes	up	0	0	0	0.0550017	0.0221918	0.0472915	0	0.041495	#N/A	#N/A	#N/A
Chr07_97649092_97651052		22.7075	4.5051	0.00250067	0.0762256	yes	up	0	0	0	0.103128	0.059178	0.0315277	0	0.0646113	#N/A	#N/A	#N/A
Chr07_97789171_97799770	Pig.08775	9.44645	3.23977	0.0303063	0.344257	yes	up	0	0	0	0.0206257	0.0369863	0.0236457	0	0.0270859	FBXO22-202	ubiquitin-conjugating enzyme E2 Q2 isoform X1 [Sus scrofa]	XP_020954668.1
Chr08_103821701_103827202	Pig.01006	13.7345	3.77973	0.0125247	0.206409	yes	up	0	0	0	0.0343761	0.0443835	0.0394096	0	0.0393897	BBS7-201	PREDICTED: Bardet-Biedl syndrome 7 protein isoform X2 [Chinchilla lanigera]	XP_026959428.1
Chr08_114684141_114685006	Pig.00666	14.5418	3.86213	0.0111064	0.198158	yes	up	0	0	0	0.0343761	0.0665753	0.0236457	0	0.0415324	SEC24B-203	protein transport protein Sec24B isoform X1 [Sus scrofa]	XP_020957338.1
Chr08_117809709_117824540	Pig.00649	0.0533764	-4.22765	0.00108014	0.0419866	yes	down	0.0943709	0.0766805	0.0681414	0	0.029589	0	0.0797309	0.00986301	NPNT-201	nephronectin isoform X1 [Sus scrofa]	XP_020957362.1
Chr08_139877592_139902897	Pig.00525	0.448173	-1.15787	0.0269057	0.321125	yes	down	0.188742	0.253046	0.09292	0.261258	0.125753	0.16552	0.178236	0.184177	ANTXR2-205	anthrax toxin receptor 2 [Sus scrofa]	XP_003129419.3
Chr08_15357160_15363180	Pig.04163	3.06634	1.61652	0.0475135	0.419406	yes	up	0.0188742	0.0230042	0	0.0893778	0.0961643	0.102465	0.0139594	0.0960023	GUCY1B1-201	PREDICTED: guanylate cyclase soluble subunit beta-1 [Bubalus bubalis]	XP_004421004.1
Chr08_27230303_27261524	Pig.12465	19.3828	4.27671	0.00525439	0.119693	yes	up	0	0	0	0.0893778	0.0369863	0.0394096	0	0.0552579	LIMCH1-207	LOW QUALITY PROTEIN: LIM and calponin homology domains-containing protein 1 [Sus scrofa]	XP_020956816.1
Chr08_28714920_28729664		0.131851	-2.92302	0.0415918	0.389016	yes	down	0.031457	0.0306722	0.0123893	0	0	0.0236457	0.0248395	0.00788191	#N/A	#N/A	#N/A
Chr08_43322535_43386440	Pig.05313	0.0353031	-4.82406	0.00853051	0.165797	yes	down	0	0.0306722	0.018584	0	0	0	0.0164187	0	ADGRA3-201	adhesion G protein-coupled receptor A3 isoform X1 [Sus scrofa]	XP_020956719.1
Chr08_49633206_49660217	Pig.05336	0.465427	-1.10337	0.0367859	0.369975	yes	down	0.106954	0.115021	0.0805307	0.0687522	0.133151	0.126111	0.100835	0.109338	CPEB2-201	cytoplasmic polyadenylation element-binding protein 2 isoform X1 [Sus scrofa]	XP_020955979.1
Chr08_68850083_68855255	Pig.08308,MSTRG.22655	17.9313	4.16441	0.00508884	0.118469	yes	up	0	0	0	0.0481265	0.0739725	0.0315277	0	0.0512089	#N/A	#N/A	#N/A
Chr08_69299910_69351828	Pig.08312	0.023384	-5.41833	0.0161761	1	yes	down	0.0377484	0	0.037168	0	0	0	0.0249721	0	SLC4A4-205	electrogenic sodium bicarbonate cotransporter 1 isoform X5 [Sus scrofa]	XP_020956162.1
Chr08_71010842_71014371	MSTRG.22686,Pig.08321	0.015402	-6.02074	0.0264518	0.319306	yes	down	0.0251656	0.0690125	0.018584	0	0	0	0.0375873	0	#N/A	#N/A	#N/A
Chr08_71012313_71017161	MSTRG.22686,Pig.08321	0.213914	-2.22489	1.47883e-06	0.000289221	yes	down	0.22649	0.306722	0.377875	0.14438	0.16274	0.149756	0.303696	0.152292	#N/A	#N/A	#N/A
Chr08_71012313_71018900	MSTRG.22686,Pig.08321	0.198061	-2.33598	0.00291323	0.086925	yes	down	0.0943709	0.122689	0.117699	0.0481265	0.0517808	0.0551734	0.111586	0.0516936	#N/A	#N/A	#N/A
Chr08_71012313_71020074	MSTRG.22686,Pig.08321	0.220754	-2.17949	1.51249e-05	0.00173201	yes	down	0.232782	0.391071	0.284955	0.178756	0.170137	0.118229	0.302936	0.155707	#N/A	#N/A	#N/A
Chr08_71021523_71023766	MSTRG.22686	0.176421	-2.50291	3.93887e-07	9.81706e-05	yes	down	0.289404	0.283718	0.284955	0.116879	0.140548	0.094583	0.286026	0.117337	0	0	NP_001005208.1
Chr08_71078825_71090128		0.0845962	-3.56326	0.00127905	0.0467144	yes	down	0.0754967	0.0920166	0.055752	0.0137504	0.029589	0	0.0744218	0.0144465	#N/A	#N/A	#N/A
Chr08_71080336_71084796	Pig.08323	0.348387	-1.52124	6.7071e-05	0.00498561	yes	down	0.352318	0.291386	0.315928	0.275009	0.273698	0.228576	0.319877	0.259094	AFM-203	afamin isoform X1 [Sus scrofa]	XP_003357020.1
Chr08_85710416_85712789	Pig.01066	19.2274	4.26509	0.0341383	0.357145	yes	up	0	0	0	0.0206257	0.0665753	0.0788191	0	0.05534	SMARCA5-201	SWI/SNF-related matrix-associated actin-dependent regulator of chromatin subfamily A member 5 [Sus scrofa]	XP_003129222.2
Chr08_87802538_87815783	Pig.01059	39.2201	5.29352	0.00047607	0.0237307	yes	up	0	0	0	0.123754	0.118356	0.094583	0	0.112231	RNF150-202	LOW QUALITY PROTEIN: RING finger protein 150 [Sus scrofa]	XP_020957213.1
Chr08_89060362_89088138	Pig.01050	11.0637	3.46776	0.0374031	0.372011	yes	up	0	0	0	0.0412513	0.0221918	0.0315277	0	0.0316569	SETD7-201	histone-lysine N-methyltransferase SETD7 isoform X2 [Sus scrofa]	XP_020957219.1
Chr08_98411085_98446659	Pig.01030	0.0438444	-4.51146	0.0173153	0.25474	yes	down	0.0503312	0.0460083	0.0433627	0.0137504	0	0	0.0465674	0.00458348	LARP1B-201	la-related protein 1B isoform X1 [Sus scrofa]	XP_013834346.2
Chr09_10030986_10046260		0.163737	-2.61055	3.61662e-05	0.00312726	yes	down	1.17649	0.858822	1.20796	0.556893	0.392055	0.283749	1.08109	0.410899	#N/A	#N/A	#N/A
Chr09_102462944_102468074	Pig.08198	11.7506	3.55466	0.0385743	0.37355	yes	up	0	0	0	0.0481265	0.0517808	0	0	0.0333024	NPAT-201	protein NPAT isoform X1 [Sus scrofa]	XP_020918400.1
Chr09_109132367_109193076	Pig.11684	0.0354759	-4.81702	0.0431089	0.394905	yes	down	0.0377484	0	0.0123893	0	0	0	0.0167126	0	PICALM-207	phosphatidylinositol-binding clathrin assembly protein isoform X6 [Sus scrofa]	XP_020957732.1
Chr09_109408178_109416362	Pig.11683	22.4142	4.48634	0.0121188	0.204761	yes	up	0	0	0	0.061877	0.0369863	0.094583	0	0.0644821	EED-201	polycomb protein EED isoform X1 [Sus scrofa]	XP_003482629.1
Chr09_110087896_110158133	Pig.11675	55.7028	5.79968	4.03306e-05	0.00341762	yes	up	0	0	0	0.0962531	0.133151	0.252221	0	0.160542	TMEM135-201	transmembrane protein 135 isoform X1 [Sus scrofa]	XP_020918270.1
Chr09_116505101_116511736	MSTRG.25472,Pig.08139	37.1424	5.215	0.000132881	0.00893678	yes	up	0	0	0	0.0893778	0.0739725	0.157638	0	0.106996	#N/A	#N/A	#N/A
Chr09_116510800_116511736	MSTRG.25472,Pig.08139	18.9042	4.24063	0.00436774	0.112842	yes	up	0	0	0	0.0412513	0.0739725	0.0472915	0	0.0541718	#N/A	#N/A	#N/A
Chr09_117431858_117432524	Pig.08148	0.414711	-1.26982	0.0431535	0.394905	yes	down	0.0440398	0.122689	0.0619467	0.0825026	0.0961643	0.0394096	0.0762251	0.0726922	CEP57	centrosomal protein of 57 kDa isoform X1 [Sus scrofa]	XP_020918348.1
Chr09_117715212_117716726	Pig.08150	3.24605	1.69868	0.00155453	0.0535492	yes	up	0.0377484	0.0383403	0.018584	0.254383	0.21452	0.236457	0.0315575	0.23512	MAML2-201	mastermind-like protein 2 isoform X2 [Sus scrofa]	XP_020957993.1
Chr09_124151096_124157955	Pig.12901	0.0725293	-3.78529	0.00961342	0.183478	yes	down	0.132119	0.0153361	0.0247787	0.0275009	0	0	0.0574114	0.00916696	RNF121-201	RING finger protein 121 isoform X1 [Sus scrofa]	XP_003129664.1
Chr09_131363257_131386887		23.0271	4.52526	0.00112615	0.0429863	yes	up	0	0	0	0.0825026	0.0443835	0.0709372	0	0.0659411	#N/A	#N/A	#N/A
Chr09_132363589_132363802	MSTRG.25786,Pig.20569	182.4	7.51096	0.000217518	0.0129806	yes	up	0	0	0	0.288759	0.821095	0.457151	0	0.522335	#N/A	#N/A	#N/A
Chr09_132961125_133032137	Pig.10255	30.4556	4.92864	0.00105943	0.0415631	yes	up	0	0	0	0.0412513	0.103562	0.118229	0	0.0876805	UVRAG-201	UV radiation resistance-associated gene protein isoform X2 [Sus scrofa]	XP_020918186.1
Chr09_133753630_133848763	Pig.10246	22.3399	4.48155	0.0130238	0.210517	yes	up	0	0	0	0.0412513	0.110959	0.0394096	0	0.0638732	ACER3-201	alkaline ceramidase 3 isoform X1 [Sus scrofa]	XP_020918213.1
Chr09_133824263_133848763	Pig.10246	43.9943	5.45924	0.0319803	0.349546	yes	up	0	0	0	0.0756274	0.199726	0.102465	0	0.125939	ACER3-201	alkaline ceramidase 3 isoform X1 [Sus scrofa]	XP_020918213.1
Chr09_140208927_140230748		0.113539	-3.13874	0.0377234	0.37355	yes	down	0	0.0230042	0.0309733	0.0137504	0	0	0.0179925	0.00458348	#N/A	#N/A	#N/A
Chr09_16522266_16542844	Pig.04694	11.1926	3.48448	0.0396003	0.379617	yes	up	0	0	0	0.0275009	0.029589	0.0394096	0	0.0321665	CEP350	LOW QUALITY PROTEIN: centrosome-associated protein 350 [Sus scrofa]	XP_020919409.1
Chr09_16536395_16537017	Pig.04694	3.91909	1.97052	0.0173824	0.254842	yes	up	0.0125828	0	0.018584	0.130629	0.0887671	0.0788191	0.0103889	0.0994051	CEP350	LOW QUALITY PROTEIN: centrosome-associated protein 350 [Sus scrofa]	XP_020919409.1
Chr09_17271933_17273563	Pig.04684	18.2468	4.18957	0.0204674	0.282477	yes	up	0	0	0	0.0206257	0.0813698	0.0551734	0	0.0523896	ABL2-205	Abelson tyrosine-protein kinase 2 isoform X5 [Sus scrofa]	XP_003482779.2
Chr09_20162542_20206602	Pig.04669	10.9168	3.44848	0.0308453	0.345745	yes	up	0	0	0	0.0550017	0.0221918	0.0157638	0	0.0309858	COP1-203	E3 ubiquitin-protein ligase RFWD2 isoform X1 [Sus scrofa]	XP_020919333.1
Chr09_22002661_22003677	Pig.04659	4.56303	2.18999	0.0032047	0.0903854	yes	up	0	0	0.037168	0.123754	0.140548	0.157638	0.0123893	0.140647	RC3H1-201	roquin-1 isoform X1 [Sus scrofa]	XP_003357594.3
Chr09_23271876_23286452	Pig.04645	0.220413	-2.18172	7.06002e-06	0.000934791	yes	down	0.446689	0.199369	0.260176	0.165005	0.170137	0.126111	0.302078	0.153751	SUCO-201	LOW QUALITY PROTEIN: SUN domain-containing ossification factor [Sus scrofa]	XP_003357586.3
Chr09_24228804_24243829		0.0357333	-4.80659	0.0271945	0.322754	yes	down	0.0188742	0.0306722	0	0	0	0	0.0165155	0	#N/A	#N/A	#N/A
Chr09_38770634_38831263		0.000273855	-11.8343	2.92064e-05	0.00257807	yes	down	2.74305	1.57195	2.09999	0	0	0	2.13833	0	#N/A	#N/A	#N/A
Chr09_45493560_45496209	Pig.00341	0.300984	-1.73224	0.0124086	0.205372	yes	down	0.100662	0.138025	0.117699	0.0893778	0.0665753	0.094583	0.118795	0.083512	ABCB1	LOW QUALITY PROTEIN: multidrug resistance protein 1-like [Sus scrofa]	XP_020919622.1
Chr09_60430146_60510782	Pig.00397	0.0499705	-4.32278	0.0403093	0.382938	yes	down	0.0125828	0.0230042	0	0	0	0	0.0118623	0	GLCCI1-202	glucocorticoid-induced transcript 1 protein isoform X1 [Sus scrofa]	XP_020958076.1
Chr09_66539763_66565923	MSTRG.24574,Pig.00439	0.0322853	-4.95298	0.00215043	0.0689941	yes	down	0.0125828	0.0230042	0.018584	0	0	0	0.018057	0	#N/A	#N/A	#N/A
Chr09_66541500_66565923	MSTRG.24574,Pig.00439	0.0394967	-4.66212	0.0151817	0.233909	yes	down	0.0188742	0	0.0247787	0	0	0	0.014551	0	#N/A	#N/A	#N/A
Chr09_66642968_66649228	Pig.00442	0.0324584	-4.94526	0.0220205	0.294487	yes	down	0	0.0153361	0.037168	0	0	0	0.0175014	0	CYP51A1-202	lanosterol 14-alpha demethylase [Sus scrofa]	NP_999597.1
Chr09_73629528_73630300	Pig.00508	19.7003	4.30015	0.00127821	0.0467144	yes	up	0	0	0	0.0550017	0.059178	0.0551734	0	0.0564511	PIK3C2B-201	phosphatidylinositol 4-phosphate 3-kinase C2 domain-containing subunit beta isoform X1 [Sus scrofa]	XP_003357437.4
Chr09_8107518_8113176	Pig.14368	0.354917	-1.49445	0.0309652	0.346173	yes	down	0.0943709	0.0690125	0.0867254	0.0550017	0.0813698	0.0709372	0.0833696	0.0691029	LPGAT1-201	acyl-CoA:lysophosphatidylglycerol acyltransferase 1 [Sus scrofa]	XP_003357646.2
Chr09_8107518_8117610	Pig.14368	0.354492	-1.49617	1.69307e-05	0.00188777	yes	down	0.792716	0.720797	0.774334	0.577518	0.636164	0.677845	0.762615	0.630509	LPGAT1-201	acyl-CoA:lysophosphatidylglycerol acyltransferase 1 [Sus scrofa]	XP_003357646.2
Chr09_90951665_90967965		0.260416	-1.94111	0.000630105	0.0296639	yes	down	0.515894	0.168697	0.303539	0.247508	0.118356	0.228576	0.329377	0.198146	#N/A	#N/A	#N/A
Chr09_92664524_92666467	MSTRG.25007,Pig.06854	2.0809	1.05721	0.00344179	0.0934798	yes	up	0.0754967	0.115021	0.117699	0.453764	0.687945	0.346804	0.102739	0.496171	#N/A	#N/A	#N/A
Chr09_95075653_95110016	Pig.12746	10.9534	3.4533	0.0406779	0.384146	yes	up	0	0	0	0.0481265	0.029589	0.0157638	0	0.0311598	SIK3-205	PREDICTED: serine/threonine-protein kinase SIK3 isoform X4 [Pongo abelii]	XP_029062906.1
Chr10_14002831_14014140	Pig.12117	19.1349	4.25814	0.0356674	0.368592	yes	up	0	0	0	0.0275009	0.0665753	0.0709372	0	0.0550045	KDM5B-201	lysine-specific demethylase 5B [Sus scrofa]	XP_020920226.1
Chr10_16363_16990		8.04049	3.00728	0.0127862	0.208929	yes	up	0.0188742	0	0	0.0962531	0.170137	0.094583	0.00629139	0.120324	#N/A	#N/A	#N/A
Chr10_17210237_17246070	Pig.10851,MSTRG.26305	3.26767	1.70826	0.00104969	0.0415631	yes	up	0.0251656	0.0843486	0.037168	0.206257	0.332876	0.559616	0.048894	0.36625	#N/A	#N/A	#N/A
Chr10_20961970_20996575	Pig.11163	17.6724	4.14343	0.0340937	0.357145	yes	up	0	0	0	0.0825026	0.029589	0.0394096	0	0.0505004	MARK1-201	serine/threonine-protein kinase MARK1 isoform X1 [Sus scrofa]	XP_020919987.1
Chr10_20969083_20996575	Pig.11163	32.7224	5.03221	0.000265062	0.0147772	yes	up	0	0	0	0.0687522	0.118356	0.094583	0	0.0938971	MARK1-201	serine/threonine-protein kinase MARK1 isoform X1 [Sus scrofa]	XP_020919987.1
Chr10_22670141_22673756	Pig.11154	81.8963	6.35573	1.48909e-06	0.000289221	yes	up	0	0	0	0.295634	0.133151	0.275867	0	0.234884	TGFB2-201	transforming growth factor beta-2 isoform X1 [Sus scrofa]	XP_020919953.1
Chr10_22671725_22673756	Pig.11154	19.5361	4.28807	0.0334737	0.355459	yes	up	0	0	0	0.061877	0.0739725	0.0315277	0	0.0557924	TGFB2-201	transforming growth factor beta-2 isoform X1 [Sus scrofa]	XP_020919953.1
Chr10_22785187_22791068	Pig.11153	0.342011	-1.54788	0.0125687	0.206409	yes	down	0.0692053	0.0306722	0.123893	0.103128	0.0517808	0.0236457	0.0745903	0.0595183	RRP15-202	RRP15-like protein isoform X1 [Sus scrofa]	XP_010991341.1
Chr10_33794237_33815106	MSTRG.26482,Pig.17816	0.164031	-2.60796	0.0441679	0.400727	yes	down	0.031457	0.0766805	0.0867254	0	0.0443835	0.0315277	0.0649543	0.0253037	#N/A	#N/A	#N/A
Chr10_34281541_34341728		0.283071	-1.82077	0.024732	0.308661	yes	down	0.0251656	0.0690125	0.074336	0.0206257	0.029589	0.0630553	0.0561714	0.0377567	#N/A	#N/A	#N/A
Chr10_39752709_39765278		0.48012	-1.05853	0.00792906	0.157725	yes	down	0.339735	0.345062	0.216813	0.288759	0.392055	0.323158	0.300537	0.334657	#N/A	#N/A	#N/A
Chr10_46727592_46756522	Pig.09685	0.0233915	-5.41787	0.019061	0.268311	yes	down	0.0188742	0.0306722	0.0247787	0	0	0	0.024775	0	PARD3-201	LOW QUALITY PROTEIN: partitioning defective 3 homolog [Sus scrofa]	XP_020919890.1
Chr10_53361043_53363531	Pig.16905	22.2407	4.47513	0.00997364	0.18616	yes	up	0	0	0	0.061877	0.0739725	0.0551734	0	0.0636743	ARHGAP21-201	LOW QUALITY PROTEIN: rho GTPase-activating protein 21 [Sus scrofa]	XP_020920575.1
Chr10_56001317_56001808		12.7694	3.67461	0.0261161	0.317971	yes	up	0	0	0	0.0275009	0.0813698	0	0	0.0362902	#N/A	#N/A	#N/A
Chr10_61841725_61864145	Pig.05022	2.11961	1.0838	0.00797841	0.157965	yes	up	0.106954	0.107353	0.074336	0.508766	0.495616	0.40986	0.0962141	0.471414	ARHGAP12-201	rho GTPase-activating protein 12 isoform X5 [Sus scrofa]	XP_013835673.1
Chr10_61852304_61864145	Pig.05022	24.4667	4.61275	0.0107054	0.195478	yes	up	0	0	0	0.0275009	0.0813698	0.102465	0	0.0704452	ARHGAP12-201	rho GTPase-activating protein 12 isoform X5 [Sus scrofa]	XP_013835673.1
Chr10_70809293_70891947		21.042	4.3952	0.023011	0.298157	yes	up	0	0	0	0.0275009	0.0443835	0.110347	0	0.0607437	#N/A	#N/A	#N/A
Chr10_71425687_71427450	MSTRG.27019	32.7197	5.03209	0.00120425	0.0451541	yes	up	0	0	0	0.0756274	0.103562	0.102465	0	0.0938846	0	0	NP_001106909.1
Chr10_71566221_71587148	MSTRG.27025,Pig.05069	16.1227	4.01102	0.0332113	0.355459	yes	up	0	0	0	0.0481265	0.0739725	0.0157638	0	0.0459543	#N/A	#N/A	#N/A
Chr10_71634365_71645283	MSTRG.27025,Pig.05070	10.195	3.34979	0.0255706	0.314036	yes	up	0	0	0	0.0481265	0	0.0394096	0	0.0291787	#N/A	#N/A	#N/A
Chr10_71673526_71683181	MSTRG.27025,Pig.05070	0.313381	-1.67401	0.00234069	0.0724947	yes	down	0.0817881	0.161029	0.0867254	0.0343761	0.0665753	0.141874	0.109848	0.0809419	#N/A	#N/A	#N/A
Chr10_75688817_75690713	Pig.09939	11.8952	3.57231	0.00920467	0.178083	yes	up	0	0	0	0.0481265	0.029589	0.0236457	0	0.0337871	NAA35	PREDICTED: N-alpha-acetyltransferase 35, NatC auxiliary subunit isoform X1 [Miniopterus natalensis]	XP_016078359.1
Chr10_75879157_75880339	MSTRG.27145,Pig.09943	0.412928	-1.27604	0.000109148	0.00745903	yes	down	0.987749	0.651784	0.854864	0.7769	0.59178	1.03253	0.831466	0.800404	#N/A	#N/A	#N/A
Chr11_12201402_12245406	Pig.03511	2.73838	1.45332	0.00182013	0.0607236	yes	up	0.0817881	0.0460083	0.0495574	0.31626	0.532602	0.283749	0.0591179	0.377537	PAN3-201	PAB-dependent poly(A)-specific ribonuclease subunit PAN3 isoform X1 [Sus scrofa]	XP_005668351.1
Chr11_12275090_12300096	Pig.03511	22.8954	4.51698	0.000952978	0.0389589	yes	up	0	0	0	0.0825026	0.0813698	0.0315277	0	0.0651334	PAN3-201	PAB-dependent poly(A)-specific ribonuclease subunit PAN3 isoform X1 [Sus scrofa]	XP_005668351.1
Chr11_12285086_12300096	Pig.03511	15.292	3.93471	0.0171219	0.252772	yes	up	0	0	0	0.061877	0.0221918	0.0472915	0	0.0437867	PAN3-201	PAB-dependent poly(A)-specific ribonuclease subunit PAN3 isoform X1 [Sus scrofa]	XP_005668351.1
Chr11_12464386_12465127	Pig.03510	7.06041	2.81975	0.00572454	0.128333	yes	up	0.0188742	0	0	0.130629	0.0887671	0.102465	0.00629139	0.107287	FLT1-201	vascular endothelial growth factor receptor 1 isoform X2 [Sus scrofa]	XP_001925775.5
Chr11_15621464_15623081	Pig.03488	12.2082	3.60978	0.0229952	0.298157	yes	up	0	0	0	0.0137504	0.0369863	0.0551734	0	0.0353034	N4BP2L2	LOW QUALITY PROTEIN: NEDD4-binding protein 2-like 2 [Sus scrofa]	XP_020920838.1
Chr11_29171746_29215080		4.39175	2.1348	0.033217	0.355459	yes	up	0.0188742	0	0.018584	0.0825026	0.133151	0.181284	0.0124861	0.132312	#N/A	#N/A	#N/A
Chr11_29573414_29594388	Pig.07336	12.7765	3.67543	0.0386055	0.37355	yes	up	0	0	0	0.0343761	0.059178	0.0157638	0	0.0364393	NAA16	N-alpha-acetyltransferase 16, NatA auxiliary subunit isoform X1 [Sus scrofa]	XP_020921285.1
Chr11_34579623_34579988	Pig.07349	15.0719	3.91379	0.0372281	0.371407	yes	up	0	0	0	0.0756274	0.029589	0.0236457	0	0.0429541	PCDH17-201	protocadherin-17 isoform X1 [Sus scrofa]	XP_020921306.1
Chr11_52476173_52507914	Pig.04496	0.0883083	-3.50131	0.027008	0.32144	yes	down	0	0	0.018584	0	0	0	0.00619467	0	LMO7-201	LIM domain only protein 7 isoform X1 [Sus scrofa]	XP_020921337.1
Chr11_73469919_73470694		4.66238	2.22107	1.98124e-05	0.00209863	yes	up	0.0566225	0.0460083	0.018584	0.30251	0.473424	0.528088	0.040405	0.434674	#N/A	#N/A	#N/A
Chr11_76729156_76730764	Pig.07943	29.5496	4.88507	0.0128207	0.208929	yes	up	0	0	0	0.110003	0.103562	0.0394096	0	0.0843249	NALCN	sodium leak channel non-selective protein isoform X1 [Sus scrofa]	XP_020921537.1
Chr11_81152042_81152325	Pig.07954	24.3643	4.6067	0.013836	0.21793	yes	up	0	0	0	0.0275009	0.103562	0.0788191	0	0.0699605	EFNB2-201	EFNB2 [Sus scrofa]	AHA44850.1
Chr11_82932722_82981452	Pig.07964	0.092602	-3.43281	0.0320094	0.349546	yes	down	0.0692053	0.0536764	0.0867254	0	0.0221918	0.0236457	0.069869	0.0152792	MYO16	LOW QUALITY PROTEIN: unconventional myosin-XVI [Sus scrofa]	XP_020921564.1
Chr12_11843480_11891592	MSTRG.28723	0.0169221	-5.88494	0.00841498	0.164305	yes	down	0.0188742	0	0.359291	0	0	0.0157638	0.126055	0.00525461	0	0	XP_020921875.1
Chr12_15327650_15371282	Pig.18677,MSTRG.28969	0.315633	-1.66368	0.00681035	0.143559	yes	down	0.0943709	0.145693	0.0805307	0.0825026	0.0961643	0.0551734	0.106865	0.0779468	#N/A	#N/A	#N/A
Chr12_15371151_15382081	Pig.18677,MSTRG.28969	0.0566735	-4.14118	0.0470244	0.415955	yes	down	0.031457	0	0	0	0	0	0.0104857	0	#N/A	#N/A	#N/A
Chr12_17090824_17093997	Pig.17612	0.178424	-2.48661	0.0264442	0.319306	yes	down	0.031457	0.0460083	0.0433627	0.0343761	0.0147945	0	0.040276	0.0163902	NCBP3-201	nuclear cap-binding protein subunit 3 [Sus scrofa]	XP_003131914.3
Chr12_21184224_21202762	Pig.11854	18.1747	4.18386	0.0114738	0.19924	yes	up	0	0	0	0.0412513	0.0369863	0.0788191	0	0.0523522	TAOK1-202	PREDICTED: serine/threonine-protein kinase TAO1 [Camelus ferus]	NP_001193029.1
Chr12_27312206_27315092	MSTRG.29412	3.46162e+06	21.723	4.89027e-06	0.000690669	yes	up	0	0	0	1.62943	0	1.42663	0	1.01868	0	0	XP_020923050.1
Chr12_27312206_27340379	MSTRG.29412	2.62509e-07	-21.8611	2.0889e-07	5.57689e-05	yes	down	0	0.122689	0.0867254	0	0	0	0.0698047	0	0	0	XP_020923050.1
Chr12_27312206_27348924	MSTRG.29412,Pig.11225	6.73979	2.7527	0.0139342	0.218663	yes	up	0.18245	0.107353	0.037168	1.45755	2.20438	1.38722	0.10899	1.68305	#N/A	#N/A	#N/A
Chr12_28048634_28069283	Pig.11217	19.9944	4.32153	0.037213	0.371407	yes	up	0	0	0	0.0412513	0.0369863	0.094583	0	0.0576069	ACACA-203	acetyl-CoA carboxylase 1 isoform X1 [Sus scrofa]	XP_020921886.1
Chr12_28082367_28086865	Pig.11217	4.75698	2.25004	1.28299e-05	0.00155315	yes	up	0.0692053	0.0153361	0.0433627	0.440014	0.599178	0.401978	0.0426347	0.48039	ACACA-203	acetyl-CoA carboxylase 1 isoform X1 [Sus scrofa]	XP_020921886.1
Chr12_30652472_30656518	Pig.11189	17.027	4.08975	0.00727149	0.148619	yes	up	0	0	0	0.061877	0.0369863	0.0472915	0	0.0487182	RPS6KB1-203	ribosomal protein S6 kinase beta-1 isoform X1 [Sus scrofa]	XP_003131719.1
Chr12_31796253_31823882	Pig.11176	2.80992	1.49053	0.000867321	0.0374984	yes	up	0.0377484	0.0613444	0.0433627	0.309385	0.29589	0.315277	0.0474852	0.306851	RAD51C-201	DNA repair protein RAD51 homolog 3 isoform X1 [Sus scrofa]	XP_020922938.1
Chr12_33534190_33535176	Pig.13406	2.97129	1.57109	0.0406985	0.384146	yes	up	0.0440398	0.0536764	0.037168	0.17188	0.451233	0.307395	0.0449614	0.310169	SCPEP1-201	retinoid-inducible serine carboxypeptidase [Sus scrofa]	XP_005657025.1
Chr12_40853263_40853381	MSTRG.29689	7.6372	2.93304	0.00515332	0.118566	yes	up	0	0.0306722	0	0.14438	0.170137	0.189166	0.0102241	0.167894	0	0	OWK14899.1
Chr12_47059189_47062026		6.57424	2.71682	0.0131158	0.210517	yes	up	0	0.0230042	0	0.0756274	0.118356	0.126111	0.00766805	0.106698	#N/A	#N/A	#N/A
Chr12_48468550_48486979		47.8164	5.57943	0.000959279	0.0389589	yes	up	0	0	0	0.151255	0.125753	0.133993	0	0.137	#N/A	#N/A	#N/A
Chr12_48587972_48592895		14.9932	3.90623	0.000965468	0.0389589	yes	up	0	0	0.0123893	0.178756	0.133151	0.149756	0.00412978	0.153888	#N/A	#N/A	#N/A
Chr12_56004263_56093033		0.0249615	-5.32415	0.000346766	0.0177018	yes	down	0.276821	0.291386	0.303539	0.0206257	0.029589	0	0.290582	0.0167382	#N/A	#N/A	#N/A
Chr12_6014140_6037875		0.403362	-1.30985	0.00506099	0.118469	yes	down	0.125828	0.115021	0.154867	0.151255	0.125753	0.094583	0.131905	0.123864	#N/A	#N/A	#N/A
Chr12_6060022_6072546	Pig.19289	0.0399012	-4.64742	0.0112384	0.198158	yes	down	0.031457	0	0.0123893	0	0	0	0.0146154	0	NCOR1	LOW QUALITY PROTEIN: nuclear receptor corepressor 1 [Sus scrofa]	XP_020921950.1
Chr13_102470212_102479788	MSTRG.32189,Pig.06534	0.372035	-1.42649	1.87667e-06	0.000306713	yes	down	0.736093	0.728465	0.65044	0.584394	0.732328	0.512324	0.704999	0.609682	#N/A	#N/A	#N/A
Chr13_102490154_102498161	MSTRG.32189,Pig.06534	0.0129779	-6.2678	0.00537365	0.121755	yes	down	0.0503312	0.0536764	0.0309733	0	0	0	0.0449936	0	#N/A	#N/A	#N/A
Chr13_10327454_10331181	Pig.15846	12.9114	3.69057	0.000955568	0.0389589	yes	up	0	0	0.0123893	0.103128	0.177534	0.118229	0.00412978	0.132964	RBM6-201	RNA-binding protein 6 isoform X1 [Sus scrofa]	XP_003483235.1
Chr13_10327454_10337372	Pig.15846	9.49285	3.24684	0.0288476	0.33487	yes	up	0	0	0	0.0206257	0.0221918	0.0394096	0	0.027409	RBM6-201	RNA-binding protein 6 isoform X1 [Sus scrofa]	XP_003483235.1
Chr13_10429524_10429861	Pig.15844	15.5437	3.95826	0.0229571	0.298157	yes	up	0	0	0	0.0206257	0.0813698	0.0315277	0	0.0445077	SEMA3F-201	semaphorin-3F isoform X1 [Sus scrofa]	XP_001925178.2
Chr13_105669263_105669434		0.0279109	-5.16303	0.0159076	0.240716	yes	down	0.0503312	0.0766805	0.105309	0	0	0.0157638	0.0774403	0.00525461	#N/A	#N/A	#N/A
Chr13_110994124_110999222	Pig.15072	10.3283	3.36853	0.0257873	0.314873	yes	up	0	0	0	0.0137504	0.059178	0.0157638	0	0.0295641	DLG1-202	disks large homolog 1 isoform X1 [Sus scrofa]	XP_020925751.1
Chr13_110994124_111003917	Pig.15072	13.5924	3.76473	0.0242212	0.306754	yes	up	0	0	0	0.0412513	0.059178	0.0157638	0	0.0387311	DLG1-202	disks large homolog 1 isoform X1 [Sus scrofa]	XP_020925751.1
Chr13_111304195_111313493	Pig.15067	0.183322	-2.44755	0.0423412	0.390849	yes	down	0.031457	0	0.037168	0	0.0147945	0.0157638	0.022875	0.0101861	PAK2-201	serine/threonine-protein kinase PAK 2 [Sus scrofa]	XP_020925795.1
Chr13_112476399_112488858	Pig.15042	6.67383	2.73852	0.0281579	0.328664	yes	up	0	0	0.0123893	0.0825026	0.0517808	0.0709372	0.00412978	0.0684069	LRCH3-202	leucine-rich repeat and calponin homology domain-containing protein 3 isoform X1 [Sus scrofa]	XP_005670199.1
Chr13_113016848_113080574		0.0326945	-4.93481	0.025748	0.314873	yes	down	0.031457	0.0230042	0	0	0	0	0.0181537	0	#N/A	#N/A	#N/A
Chr13_123966963_123968567	Pig.02114	0.389596	-1.35995	0.0372547	0.371407	yes	down	0.031457	0.145693	0.074336	0.0825026	0.0739725	0.0709372	0.0838287	0.0758041	ZBTB20-201	zinc finger and BTB domain-containing protein 20 isoform X1 [Sus scrofa]	XP_020926914.1
Chr13_126126025_126150599	Pig.02084	12.6751	3.66393	0.0218144	0.293421	yes	up	0	0	0	0.0412513	0.0665753	0	0	0.0359422	PHLDB2-201	LOW QUALITY PROTEIN: pleckstrin homology-like domain family B member 2 [Sus scrofa]	XP_020926050.1
Chr13_126811720_126850038	Pig.02081	0.245073	-2.02871	2.10598e-07	5.57689e-05	yes	down	0.54106	0.483087	0.699998	0.33001	0.288493	0.37045	0.574715	0.329651	NECTIN3-201	nectin-3 isoform X2 [Sus scrofa]	XP_020926054.1
Chr13_126832355_126850038	Pig.02081	0.329992	-1.5995	1.59506e-06	0.000291907	yes	down	1.12616	1.31124	1.72831	0.976281	1.0652	1.18229	1.38857	1.07459	NECTIN3-201	nectin-3 isoform X2 [Sus scrofa]	XP_020926054.1
Chr13_130153766_130160627	Pig.02066	17.878	4.16011	0.00714766	0.148311	yes	up	0	0	0	0.0550017	0.0665753	0.0315277	0	0.0510349	BBX-201	HMG box transcription factor BBX isoform X1 [Sus scrofa]	XP_020926116.1
Chr13_16275382_16277665	Pig.10910,MSTRG.30983	13.4653	3.75118	0.0417402	0.389545	yes	up	0	0	0	0.0481265	0.0665753	0	0	0.0382339	#N/A	#N/A	#N/A
Chr13_17207927_17208194	Pig.10900	3.17864	1.66841	0.0421654	0.390849	yes	up	0.0251656	0.0230042	0	0.103128	0.133151	0.110347	0.0160566	0.115542	DENND6A-201	protein DENND6A isoform X1 [Sus scrofa]	XP_020924668.1
Chr13_180594582_180621458		0.138637	-2.85062	0.0239178	0.304324	yes	down	0.0377484	0.0230042	0.0309733	0	0.029589	0	0.0305753	0.00986301	#N/A	#N/A	#N/A
Chr13_181183940_181210761		14.486	3.85658	0.0254917	0.313978	yes	up	0	0	0	0.0412513	0.059178	0.0236457	0	0.0413584	#N/A	#N/A	#N/A
Chr13_188539138_188539513	Pig.21788,MSTRG.33300	23.4332	4.55048	0.0307947	0.345745	yes	up	0	0	0	0.0275009	0.110959	0.0630553	0	0.0671717	#N/A	#N/A	#N/A
Chr13_30295122_30307830	Pig.01539	15.8726	3.98846	0.00592079	0.130852	yes	up	0	0	0	0.0825026	0.0517808	0	0	0.0447611	FOXP1-203	forkhead box protein P1 isoform X4 [Sus scrofa]	XP_020926500.1
Chr13_3531213_3535176	Pig.07826	12.8086	3.67904	0.0402553	0.382938	yes	up	0	0	0	0.0343761	0.0517808	0.0236457	0	0.0366009	TRAK1-203	PREDICTED: trafficking kinesin-binding protein 1 [Balaenoptera acutorostrata scammoni]	XP_023403604.1
Chr13_46154665_46165821	Pig.14691,MSTRG.31383	53.8123	5.74986	6.58861e-05	0.00498499	yes	up	0	0	0	0.151255	0.192329	0.118229	0	0.153937	#N/A	#N/A	#N/A
Chr13_46154665_46178093	Pig.14691,MSTRG.31383	26.7398	4.74092	0.0150511	0.232743	yes	up	0	0	0	0.0756274	0.0369863	0.118229	0	0.0769475	#N/A	#N/A	#N/A
Chr13_46811147_46814259		17.0461	4.09137	0.00737428	0.149497	yes	up	0	0	0	0.0550017	0.0517808	0.0394096	0	0.0487307	#N/A	#N/A	#N/A
Chr13_48146150_48147848	MSTRG.31444,Pig.17823,MSTRG.31443	18.0978	4.17774	0.00481287	0.117711	yes	up	0	0	0	0.0412513	0.0517808	0.0630553	0	0.0520291	#N/A	#N/A	#N/A
Chr13_48514433_48516059	Pig.17826	22.8865	4.51642	0.00149138	0.0526583	yes	up	0	0	0	0.0893778	0.059178	0.0472915	0	0.0652825	FBLN2-201	fibulin-2 isoform X1 [Sus scrofa]	XP_020925041.1
Chr13_54850041_54856348	Pig.06073,MSTRG.31592	12.6593	3.66213	0.00787631	0.157415	yes	up	0	0	0	0.061877	0.029589	0.0157638	0	0.0357433	#N/A	#N/A	#N/A
Chr13_57321321_57326544		23.0621	4.52745	0.00128997	0.0467144	yes	up	0	0	0	0.0687522	0.0739725	0.0551734	0	0.065966	#N/A	#N/A	#N/A
Chr13_60625423_60632435	Pig.06117	6.25956	2.64606	0.00991619	0.185907	yes	up	0.0251656	0	0	0.130629	0.0961643	0.149756	0.00838853	0.125517	TFDP2-201	transcription factor Dp-2 isoform X1 [Sus scrofa]	XP_020925210.1
Chr13_60625423_60715757	Pig.06117	3.0843	1.62494	0.027302	0.323125	yes	up	0	0.0306722	0.018584	0.0825026	0.110959	0.149756	0.0164187	0.114406	TFDP2-201	transcription factor Dp-2 isoform X1 [Sus scrofa]	XP_020925210.1
Chr13_68731709_68734966	Pig.04754,MSTRG.31765	10.9287	3.45006	0.0294188	0.339639	yes	up	0	0	0	0.061877	0	0.0315277	0	0.0311349	#N/A	#N/A	#N/A
Chr13_70616611_70627247	Pig.04738,MSTRG.31828	11.8897	3.57164	0.0183272	0.265025	yes	up	0	0	0	0.0481265	0.0221918	0.0315277	0	0.0339487	#N/A	#N/A	#N/A
Chr13_7626662_7653595	MSTRG.30700,Pig.07899	0.421348	-1.24691	0.0209407	0.286211	yes	down	0.138411	0.107353	0.0681414	0.14438	0.0961643	0.0630553	0.104635	0.1012	#N/A	#N/A	#N/A
Chr13_7644063_7653595	MSTRG.30700,Pig.07899	0.437256	-1.19345	0.00311002	0.0896406	yes	down	0.176159	0.222373	0.148672	0.151255	0.184931	0.220694	0.182402	0.185627	#N/A	#N/A	#N/A
Chr13_86804294_86815919	Pig.11303	2.29907	1.20105	0.0109263	0.197286	yes	up	0.0566225	0.0843486	0.018584	0.240633	0.406849	0.181284	0.053185	0.276255	PHC3-201	polyhomeotic-like protein 3 isoform X1 [Sus scrofa]	XP_020925436.1
Chr13_88741695_88746200	Pig.11291	2.14927	1.10385	0.0361428	0.369896	yes	up	0.0566225	0.0766805	0.0867254	0.336886	0.443835	0.323158	0.0733428	0.36796	FNDC3B-201	fibronectin type III domain-containing protein 3B isoform X1 [Sus scrofa]	XP_020925459.1
Chr13_98711348_98734424	Pig.06481	7.69509	2.94394	0.00623038	0.133324	yes	up	0	0	0.0247787	0.165005	0.155342	0.149756	0.00825956	0.156701	ATP11B	probable phospholipid-transporting ATPase IF isoform X5 [Sus scrofa]	XP_020925528.1
Chr13_98885382_98889700	Pig.06482	0.241807	-2.04807	0.00201683	0.0662428	yes	down	0.0440398	0.0920166	0.0247787	0.0275009	0.029589	0.0315277	0.0536117	0.0295392	MCCC1-201	DCN1-like protein 1 isoform 1 [Homo sapiens]	NP_065691.2
Chr13_99751851_99755967	Pig.06491	2.94896	1.56021	0.0188023	0.266905	yes	up	0.0440398	0.0230042	0.018584	0.192506	0.236712	0.157638	0.0285426	0.195619	Parl	presenilins-associated rhomboid-like protein, mitochondrial isoform X1 [Sus scrofa]	XP_003483328.1
Chr13_99754034_99755967	Pig.06491	16.1689	4.01515	0.0386029	0.37355	yes	up	0	0	0	0.0550017	0.0443835	0.0394096	0	0.0462649	Parl	presenilins-associated rhomboid-like protein, mitochondrial isoform X1 [Sus scrofa]	XP_003483328.1
Chr14_103599061_103628217	Pig.01957	6.99465	2.80625	0.0421705	0.390849	yes	up	0.0125828	0	0	0.0206257	0.0739725	0.118229	0.00419426	0.0709423	TBC1D12-201	TBC1 domain family member 12 isoform X1 [Sus scrofa]	XP_020929670.1
Chr14_103619050_103628217	Pig.01957	2.03371	1.02411	0.0286516	0.333508	yes	up	0.119536	0.0843486	0	0.364387	0.310685	0.267985	0.0679617	0.314352	TBC1D12-201	TBC1 domain family member 12 isoform X1 [Sus scrofa]	XP_020929670.1
Chr14_110908268_110918121	Pig.16368,MSTRG.35634	0.0936384	-3.41676	0.00226579	0.0716364	yes	down	0.0566225	0.0153361	0.0619467	0.0137504	0	0.0157638	0.0446351	0.00983809	#N/A	#N/A	#N/A
Chr14_113362657_113380470		0.140745	-2.82884	1.16281e-12	2.46341e-09	yes	down	5.41689	3.42762	5.03627	1.16191	1.49425	1.89166	4.62693	1.51594	#N/A	#N/A	#N/A
Chr14_129750351_129804031	MSTRG.35885,Pig.12074	0.381405	-1.3906	0.00204293	0.0665838	yes	down	0.188742	0.168697	0.142477	0.137504	0.133151	0.173402	0.166639	0.148019	#N/A	#N/A	#N/A
Chr14_129787047_129804031	MSTRG.35885,Pig.12074	0.233265	-2.09996	0.000151356	0.0100202	yes	down	0.106954	0.191701	0.260176	0.130629	0.110959	0.0630553	0.186277	0.101548	#N/A	#N/A	#N/A
Chr14_132639539_132640389	MSTRG.35947,Pig.11537	16.8861	4.07776	0.0169394	0.250952	yes	up	0	0	0	0.061877	0.0665753	0.0157638	0	0.048072	#N/A	#N/A	#N/A
Chr14_140353741_140355292	Pig.22737	0.0248401	-5.33119	1.65347e-06	0.000291907	yes	down	0.188742	0.0920166	0.223008	0.0137504	0.0147945	0	0.167922	0.00951498	CYP2E1-202	cytochrome P450 2E1 isoform X1 [Sus scrofa]	XP_005657566.1
Chr14_17125634_17142023	Pig.10692	0.0505352	-4.30657	0.013489	0.21486	yes	down	0.0125828	0.0230042	0	0	0	0	0.0118623	0	CCDC6-202	coiled-coil domain-containing protein 6 [Sus scrofa]	XP_001929317.3
Chr14_21611369_21624122	Pig.15735	12.0885	3.59556	0.032147	0.350146	yes	up	0	0	0	0.0275009	0.029589	0.0472915	0	0.0347938	DISC1-201	disrupted in schizophrenia 1 protein isoform X1 [Sus scrofa]	XP_020929235.1
Chr14_39164972_39170296	Pig.07737	7.96065	2.99289	0.0102206	0.189103	yes	up	0	0.0153361	0	0.0825026	0.0517808	0.118229	0.00511203	0.0841707	PPP3CA-201	serine/threonine-protein phosphatase 2B catalytic subunit gamma isoform isoform X1 [Sus scrofa]	XP_003483429.1
Chr14_41912046_41913507	Pig.07715	3.8933	1.96099	0.00297478	0.0875289	yes	up	0.0377484	0.0230042	0.0123893	0.199381	0.147945	0.315277	0.0243806	0.220868	KCTD9-201	BTB/POZ domain-containing protein KCTD9 [Sus scrofa]	XP_003132863.3
Chr14_41912046_41931580	Pig.07715	5.92112	2.56587	0.000331678	0.0175473	yes	up	0	0.0306722	0.0123893	0.17188	0.229315	0.157638	0.0143538	0.186278	KCTD9-201	BTB/POZ domain-containing protein KCTD9 [Sus scrofa]	XP_003132863.3
Chr14_41930481_41931580	Pig.07715	8.40866	3.07188	6.78343e-07	0.00015127	yes	up	0.0251656	0	0.018584	0.295634	0.347671	0.260103	0.0145832	0.301136	KCTD9-201	BTB/POZ domain-containing protein KCTD9 [Sus scrofa]	XP_003132863.3
Chr14_41930481_41938885	Pig.07715	3.89097	1.96013	0.00607415	0.131882	yes	up	0.0125828	0.0306722	0.0123893	0.199381	0.177534	0.110347	0.0185481	0.162421	KCTD9-201	BTB/POZ domain-containing protein KCTD9 [Sus scrofa]	XP_003132863.3
Chr14_42930420_42931617	Pig.05610	39.2994	5.29644	0.000294567	0.0160011	yes	up	0	0	0	0.110003	0.140548	0.0867011	0	0.112417	DPYSL2-201	dihydropyrimidinase-related protein 2 isoform X1 [Sus scrofa]	XP_001927836.1
Chr14_45294336_45298576	Pig.05585	0.165621	-2.59404	0.0349726	0.362296	yes	down	0.031457	0	0.0247787	0	0.0221918	0	0.0187452	0.00739725	KIF13A-202	LOW QUALITY PROTEIN: kinesin-like protein KIF13B [Sus scrofa]	XP_020928065.1
Chr14_62315698_62320947		12.2145	3.61052	0.0268491	0.321125	yes	up	0	0	0	0.0137504	0.0369863	0.0551734	0	0.0353034	#N/A	#N/A	#N/A
Chr14_66979560_66985378		12.0708	3.59345	0.0381821	0.37355	yes	up	0	0	0	0.0343761	0.0147945	0.0551734	0	0.0347813	#N/A	#N/A	#N/A
Chr14_88277384_88278425	Pig.02045,MSTRG.35219	0.132817	-2.91249	0.0189692	0.267908	yes	down	0.0125828	0.0613444	0.0433627	0.0206257	0	0.0157638	0.0390966	0.0121298	#N/A	#N/A	#N/A
Chr14_9263882_9277104	Pig.05775	12.8105	3.67926	0.0045079	0.114955	yes	up	0	0	0	0.0412513	0.0443835	0.0236457	0	0.0364269	MTMR3-201	myotubularin-related protein 3 isoform X1 [Sus scrofa]	XP_013838486.2
Chr14_9266160_9274270	Pig.05775	3.3733	1.75416	7.13033e-05	0.00520883	yes	up	0.0503312	0.0383403	0.0309733	0.275009	0.288493	0.378332	0.0398816	0.313945	MTMR3-201	myotubularin-related protein 3 isoform X1 [Sus scrofa]	XP_013838486.2
Chr15_105579889_105581573	Pig.00043	9.51577	3.25032	0.0120264	0.204642	yes	up	0	0.0153361	0	0.14438	0.059178	0.102465	0.00511203	0.102008	SPATS2L-201	SPATS2-like protein isoform X1 [Sus scrofa]	XP_020930234.1
Chr15_106434327_106437979	Pig.00029	8.55544	3.09684	0.0333256	0.355459	yes	up	0	0.0153361	0	0.0893778	0.0739725	0.118229	0.00511203	0.0938597	CASP10-201	caspase-10 isoform X1 [Sus scrofa]	XP_020930185.1
Chr15_106449807_106454022		0.0148453	-6.07385	0.0100663	0.187065	yes	down	0.0251656	0.0230042	0.0681414	0	0	0	0.0387704	0	#N/A	#N/A	#N/A
Chr15_108518521_108523889	Pig.00007	0.389262	-1.36119	0.00331438	0.0917846	yes	down	0.213907	0.176365	0.18584	0.192506	0.140548	0.189166	0.192038	0.174073	RAPH1	LOW QUALITY PROTEIN: ras-associated and pleckstrin homology domains-containing protein 1 [Sus scrofa]	XP_020930982.1
Chr15_111123633_111129108	Pig.11696	8.58403	3.10166	0.0457189	0.410173	yes	up	0	0	0	0.0206257	0.029589	0.0236457	0	0.0246201	NDUFS1-201	NADH-ubiquinone oxidoreductase 75 kDa subunit, mitochondrial [Sus scrofa]	XP_003133651.1
Chr15_112572120_112580076	Pig.11712	11.0374	3.46433	0.0315144	0.348614	yes	up	0	0	0	0.0412513	0.029589	0.0236457	0	0.0314954	CCNYL1-202	cyclin-Y-like protein 1 isoform X1 [Sus scrofa]	XP_005672187.1
Chr15_114471451_114507975	Pig.11726	4.77619	2.25586	0.03472	0.362218	yes	up	0	0	0.018584	0.0756274	0.0887671	0.0551734	0.00619467	0.0731893	KANSL1L-201	LOW QUALITY PROTEIN: KAT8 regulatory NSL complex subunit 1-like protein [Sus scrofa]	XP_005672211.2
Chr15_114471451_114533637	Pig.11726	12.8217	3.68052	0.00468921	0.11742	yes	up	0	0	0	0.0412513	0.0369863	0.0315277	0	0.0365884	KANSL1L-201	LOW QUALITY PROTEIN: KAT8 regulatory NSL complex subunit 1-like protein [Sus scrofa]	XP_005672211.2
Chr15_114533496_114560459	MSTRG.37316	0.478101	-1.06461	0.00805986	0.158835	yes	down	0.440398	0.368066	0.359291	0.426264	0.37726	0.496561	0.389252	0.433361	0	0	XP_005672211.2
Chr15_120570504_120570627		15.8978	3.99075	0.0184204	0.265467	yes	up	0	0	0	0.0825026	0.029589	0.0236457	0	0.0452458	#N/A	#N/A	#N/A
Chr15_16010287_16022752	Pig.04255	15.2653	3.93219	0.0131169	0.210517	yes	up	0	0	0	0.061877	0.029589	0.0394096	0	0.0436252	DARS-201	aspartate--tRNA ligase, cytoplasmic isoform X1 [Sus scrofa]	XP_003133314.1
Chr15_16400419_16419151	Pig.04261	12.5103	3.64505	0.0333287	0.355459	yes	up	0	0	0	0.061877	0.0443835	0	0	0.0354202	R3HDM1-204	R3H domain-containing protein 1 isoform X6 [Sus scrofa]	XP_020930873.1
Chr15_32024135_32060812	Pig.08949	6.77736	2.76072	0.00668051	0.141527	yes	up	0.0125828	0	0.018584	0.0962531	0.0887671	0.33104	0.0103889	0.17202	PTPN4-201	band 4.1-like protein 5 isoform X1 [Sus scrofa]	KQK84396.1
Chr15_4269648_4273760	Pig.04236	2.49384	1.31837	0.0413613	0.388576	yes	up	0.0125828	0.0460083	0.0123893	0.0756274	0.133151	0.189166	0.0236601	0.132648	ACVR2A-201	PREDICTED: activin receptor type-2A isoform X2 [Tursiops truncatus]	TEA35132.1
Chr15_46857316_46862067	MSTRG.36392,Pig.02709	0.139873	-2.83781	0.031102	0.346787	yes	down	0.0440398	0.0383403	0.055752	0	0.0221918	0.0236457	0.046044	0.0152792	#N/A	#N/A	#N/A
Chr15_55229766_55237802		0.282035	-1.82606	0.0235446	0.300478	yes	down	0.0629139	0.0306722	0.0433627	0	0.0369863	0.0551734	0.0456496	0.0307199	#N/A	#N/A	#N/A
Chr15_55572130_55584996	Pig.02646	0.135577	-2.88282	0.0398561	0.381197	yes	down	0.031457	0.0613444	0.0495574	0	0.0221918	0.0236457	0.0474529	0.0152792	GSR-201	glutathione reductase, mitochondrial [Sus scrofa]	XP_003483683.2
Chr15_55579929_55584996	Pig.02646	0.296477	-1.75401	0.00985897	0.185907	yes	down	0.0943709	0.268382	0.09292	0.110003	0.140548	0.0630553	0.151891	0.104536	GSR-201	glutathione reductase, mitochondrial [Sus scrofa]	XP_003483683.2
Chr15_61746768_61755658	Pig.00267	0.271383	-1.8816	0.00424594	0.111008	yes	down	0.0943709	0.0843486	0.111504	0.061877	0.059178	0.0630553	0.0967412	0.0613701	PRPF40A-201	pre-mRNA-processing factor 40 homolog A isoform X5 [Sus scrofa]	XP_013839583.2
Chr15_66099298_66122813	Pig.00251	0.490476	-1.02775	0.0300717	0.343493	yes	down	0.125828	0.176365	0.154867	0.185631	0.147945	0.189166	0.152353	0.174247	ACVR1-202	PREDICTED: activin receptor type-1 isoform X1 [Pteropus alecto]	XP_023398704.1
Chr15_6770057_6775241		90.9873	6.50759	0.000684937	0.0318909	yes	up	0	0	0	0.061877	0.236712	0.488679	0	0.262423	#N/A	#N/A	#N/A
Chr15_76012998_76035026	Pig.00205	19.7352	4.3027	0.0265564	0.319658	yes	up	0	0	0	0.0550017	0.0517808	0.0630553	0	0.0566126	STK39-201	STE20/SPS1-related proline-alanine-rich protein kinase [Sus scrofa]	XP_003133502.3
Chr15_77526292_77541510	Pig.00190	10.2376	3.3558	0.0167679	0.250952	yes	up	0	0	0	0.0343761	0.029589	0.0236457	0	0.0292036	UBR3-203	LOW QUALITY PROTEIN: E3 ubiquitin-protein ligase UBR3 [Sus scrofa]	XP_020932162.1
Chr15_78557752_78637426	Pig.00183	0.311236	-1.68392	0.0231252	0.298724	yes	down	0.0503312	0.0920166	0.0495574	0.0687522	0.0369863	0.0315277	0.0639684	0.0457554	TLK1-201	serine/threonine-protein kinase tousled-like 1 isoform X1 [Sus scrofa]	XP_001927925.1
Chr15_78573219_78637426	Pig.00183	0.364195	-1.45722	0.0105811	0.194922	yes	down	0.0880795	0.222373	0.130088	0.14438	0.110959	0.118229	0.146847	0.124522	TLK1-201	serine/threonine-protein kinase tousled-like 1 isoform X1 [Sus scrofa]	XP_001927925.1
Chr15_89874611_89878935	Pig.00114	32.7395	5.03296	0.000215616	0.0129806	yes	up	0	0	0	0.0825026	0.0739725	0.126111	0	0.0941953	NCKAP1-201	nck-associated protein 1 isoform X1 [Sus scrofa]	XP_003359630.1
Chr16_10658431_10665832	Pig.12529	0.440009	-1.1844	0.00164262	0.0561274	yes	down	0.320861	0.260714	0.229203	0.254383	0.207123	0.37045	0.270259	0.277319	FAM114A2-202	PREDICTED: protein FAM114A2 isoform X2 [Tursiops truncatus]	XP_013840357.2
Chr16_15371403_15432891	Pig.04581	38.1062	5.25195	0.0072096	0.148311	yes	up	0	0	0	0.151255	0.0813698	0.094583	0	0.109069	EBF1-201	transcription factor COE1 [Bos taurus]	NP_001179845.1
Chr16_32443001_32449725	Pig.01119	18.4471	4.20532	0.0188352	0.266905	yes	up	0	0	0	0.103128	0	0.0551734	0	0.0527672	BDP1-201	transcription factor TFIIIB component B'' homolog isoform X1 [Sus scrofa]	XP_005672583.2
Chr16_32614258_32623132	Pig.01123	0.0216368	-5.53037	0.0168258	0.250952	yes	down	0.0251656	0.0306722	0.0247787	0	0	0	0.0268722	0	OCLN-201	occludin isoform X1 [Sus scrofa]	XP_005672578.1
Chr16_35124825_35153335	Pig.01137	52.6995	5.71972	0.000570148	0.0274513	yes	up	0	0	0	0.103128	0.184931	0.16552	0	0.151193	MAST4-201	microtubule-associated serine/threonine-protein kinase 4 isoform X1 [Sus scrofa]	XP_020932413.1
Chr16_35794581_35816115	Pig.01140	0.274564	-1.86479	0.00234406	0.0724947	yes	down	0.0817881	0.0843486	0.0867254	0.061877	0.0369863	0.0630553	0.0842873	0.0539729	ERBIN-201	erbin isoform X1 [Sus scrofa]	XP_020932447.1
Chr16_53619992_53627836	Pig.01243	10.1277	3.34023	0.015821	0.240716	yes	up	0	0	0	0.0550017	0.0147945	0.0157638	0	0.02852	C5orf51-201	UPF0600 protein C5orf51 homolog [Sus scrofa]	XP_003133963.1
Chr16_53671468_53694230	Pig.01244,MSTRG.38604	56.3419	5.81614	2.19839e-05	0.00221199	yes	up	0	0	0	0.185631	0.133151	0.16552	0	0.161434	#N/A	#N/A	#N/A
Chr16_53671468_53741947	Pig.01244,MSTRG.38604	33.2114	5.05361	0.00101265	0.0404773	yes	up	0	0	0	0.0481265	0.0739725	0.16552	0	0.0958731	#N/A	#N/A	#N/A
Chr16_53729322_53741947	Pig.01244,MSTRG.38604	55.2104	5.78687	6.20749e-06	0.000848423	yes	up	0	0	0	0.206257	0.140548	0.126111	0	0.157638	#N/A	#N/A	#N/A
Chr16_54701604_54707029		17.1167	4.09733	0.00453092	0.114955	yes	up	0	0	0	0.0412513	0.0739725	0.0315277	0	0.0489172	#N/A	#N/A	#N/A
Chr16_56515608_56558089	Pig.01261	36.6748	5.19672	6.25174e-05	0.00481611	yes	up	0	0	0	0.130629	0.0739725	0.110347	0	0.104983	LIFR-205	PREDICTED: leukemia inhibitory factor receptor [Lipotes vexillifer]	XP_007192247.1
Chr16_58703341_58719462	Pig.16455	0.363259	-1.46093	0.00500072	0.117711	yes	down	0.163576	0.161029	0.179645	0.151255	0.103562	0.173402	0.168084	0.142739	Nadk2	NAD kinase 2, mitochondrial isoform X1 [Sus scrofa]	XP_003359802.2
Chr16_60541346_60541707	MSTRG.38732	7.87407	2.97711	4.88344e-05	0.00405709	yes	up	0.0377484	0.0153361	0	0.343761	0.236712	0.386214	0.0176948	0.322229	0	0	XP_020932639.1
Chr16_6840714_6845508		0.279085	-1.84123	2.81463e-05	0.00257807	yes	down	2.73047	2.72983	2.50884	2.09694	1.42767	1.6552	2.65638	1.7266	#N/A	#N/A	#N/A
Chr16_6845373_6845508		0.269666	-1.89075	2.24488e-05	0.00221199	yes	down	1.39669	1.78666	1.5115	1.05878	0.806301	1.09559	1.56495	0.98689	#N/A	#N/A	#N/A
Chr17_12099933_12151084	Pig.13480	0.182739	-2.45214	0.00307058	0.0896406	yes	down	0.0692053	0.168697	0.105309	0.0481265	0.0665753	0.0315277	0.114404	0.0487432	PSD3-201	PREDICTED: PH and SEC7 domain-containing protein 3 isoform X3 [Ovis aries musimon]	XP_020933648.1
Chr17_12219923_12224684	Pig.13480	0.367816	-1.44294	0.00124169	0.0461494	yes	down	0.591391	0.337394	0.37168	0.254383	0.392055	0.465033	0.433488	0.37049	PSD3-201	PREDICTED: PH and SEC7 domain-containing protein 3 isoform X3 [Ovis aries musimon]	XP_020933648.1
Chr17_12219923_12243444	Pig.13480	0.316984	-1.65752	5.30754e-05	0.00424303	yes	down	1.01921	0.920166	0.879643	0.666896	0.680547	0.733018	0.939672	0.693487	PSD3-201	PREDICTED: PH and SEC7 domain-containing protein 3 isoform X3 [Ovis aries musimon]	XP_020933648.1
Chr17_13394888_13399207	Pig.13496	21.6525	4.43646	0.0223829	0.296392	yes	up	0	0	0	0.0412513	0.0665753	0.0788191	0	0.0622152	GPCPD1-201	glycerophosphocholine phosphodiesterase GPCPD1 [Sus scrofa]	XP_020933708.1
Chr17_35765634_35794641	Pig.11881	20.0367	4.32457	0.0225785	0.297097	yes	up	0	0	0	0.0893778	0.0813698	0	0	0.0569159	ITCH-201	PREDICTED: E3 ubiquitin-protein ligase Itchy homolog isoform X1 [Physeter catodon]	XP_014643021.1
Chr17_4449441_4457652	MSTRG.38895	0.0814239	-3.6184	0.0232989	0.299236	yes	down	0.0754967	0.0306722	0.055752	0	0	0.0315277	0.0539737	0.0105092	0	0	XP_020933654.1
Chr17_4560664_4563512	Pig.08645	0.160004	-2.64382	0.00445879	0.114496	yes	down	0.0817881	0.0766805	0.0619467	0.0137504	0.029589	0.0394096	0.0734718	0.027583	FGL1-201	fibrinogen-like protein 1 [Sus scrofa]	XP_020933611.1
Chr17_48798227_48808378	Pig.14979	19.0692	4.25317	0.0358811	1	yes	up	0	0	0	0.0481265	0.0221918	0.094583	0	0.0549671	ARFGEF2-202	brefeldin A-inhibited guanine nucleotide-exchange protein 2 isoform X1 [Sus scrofa]	XP_003484029.1
Chr17_48840233_48846224	Pig.14979	0.0744318	-3.74794	0.0221022	0.294487	yes	down	0.0251656	0.0613444	0	0	0.0147945	0	0.0288367	0.0049315	ARFGEF2-202	brefeldin A-inhibited guanine nucleotide-exchange protein 2 isoform X1 [Sus scrofa]	XP_003484029.1
Chr17_49185401_49188054		14.6286	3.87072	0.0112281	0.198158	yes	up	0	0	0	0.0343761	0.0443835	0.0472915	0	0.042017	#N/A	#N/A	#N/A
Chr17_7571166_7574449		9.3073	3.21836	0.00397988	0.105392	yes	up	0.0251656	0	0	0.14438	0.236712	0.173402	0.00838853	0.184831	#N/A	#N/A	#N/A
Chr18_10736400_10765303	Pig.17902	0.189563	-2.39925	0.00705803	0.148044	yes	down	0.0188742	0.0536764	0.074336	0.0412513	0	0.0236457	0.0489622	0.0216324	FMC1-LUC7L2-201	putative RNA-binding protein Luc7-like 2 isoform X2 [Sus scrofa]	XP_013846229.1
Chr18_11844787_11867871	MSTRG.40295,Pig.01268	0.264471	-1.91882	0.0470191	0.415955	yes	down	0.0754967	0.0613444	0.0433627	0.0343761	0.0443835	0.0315277	0.0600679	0.0367624	#N/A	#N/A	#N/A
Chr18_11856641_11867871	MSTRG.40295,Pig.01268	0.36964	-1.43581	5.65913e-05	0.00444032	yes	down	0.515894	0.345062	0.470795	0.426264	0.310685	0.40986	0.443917	0.382269	#N/A	#N/A	#N/A
Chr18_18270856_18358987	MSTRG.40398	5.76927	2.52839	0.0244094	0.307805	yes	up	0	0	0.0309733	0.206257	0.059178	0.173402	0.0103244	0.146279	0	0	XP_020954391.1
Chr18_25510138_25527479		0.236392	-2.08075	2.31043e-05	0.00222484	yes	down	0.987749	0.467751	1.05309	0.199381	0.932054	0.244339	0.836198	0.458592	#N/A	#N/A	#N/A
Chr18_31666003_31666275	Pig.01383	3.4568	1.78944	0.00717707	0.148311	yes	up	0.0377484	0.0153361	0.0123893	0.178756	0.184931	0.16552	0.0218246	0.176402	MDFIC-201	myoD family inhibitor domain-containing protein isoform X1 [Sus scrofa]	XP_003134810.3
Chr18_31666003_31703354	Pig.01383	3.68885	1.88317	3.49095e-06	0.000510039	yes	up	0.0566225	0.0460083	0.0681414	0.453764	0.59178	0.433505	0.0569241	0.493017	MDFIC-201	myoD family inhibitor domain-containing protein isoform X1 [Sus scrofa]	XP_003134810.3
Chr18_38971782_38985420	Pig.07046	7.39172	2.88591	0.0121301	0.204761	yes	up	0	0	0.0123893	0.0756274	0.0813698	0.0709372	0.00412978	0.0759781	HERPUD2-202	PREDICTED: homocysteine-responsive endoplasmic reticulum-resident ubiquitin-like domain member 2 protein [Canis lupus familiaris]	XP_020934290.1
Chr18_39482693_39491259	Pig.07049	34.5782	5.11179	0.000854557	0.0373274	yes	up	0	0	0	0.0893778	0.0517808	0.157638	0	0.099599	DPY19L2-201	probable C-mannosyltransferase DPY19L1 [Sus scrofa]	XP_020934968.1
Chr18_41412645_41419587	Pig.07058	10.2192	3.35322	0.0452973	0.409098	yes	up	0	0	0	0.0343761	0.029589	0.0236457	0	0.0292036	AVL9-201	late secretory pathway protein AVL9 homolog isoform X2 [Sus scrofa]	XP_020934662.1
Chr18_49965466_49966837	Pig.15666	0.320259	-1.64269	0.00175494	0.0590134	yes	down	0.176159	0.138025	0.130088	0.130629	0.0739725	0.126111	0.148091	0.110237	TNS3-201	tensin-3 isoform X4 [Sus scrofa]	XP_020935014.1
Chr18_53610429_53620130	Pig.15553	5.0921	2.34826	0.00240594	0.0738692	yes	up	0.0188742	0.0230042	0	0.178756	0.147945	0.149756	0.0139594	0.158819	GLI3-201	transcriptional activator GLI3 isoform X2 [Sus scrofa]	XP_020934602.1
Chr18_7361691_7406444		0.114884	-3.12175	0.0114723	0.19924	yes	down	2.11391	2.63781	2.60176	1.05191	0	0.930066	2.45116	0.660658	#N/A	#N/A	#N/A
Chr18_9535062_9540502	Pig.17918	12.8532	3.68406	0.0460476	0.410745	yes	up	0	0	0	0.0412513	0.0221918	0.0472915	0	0.0369115	BRAF-206	serine/threonine-protein kinase B-raf isoform X1 [Sus scrofa]	XP_020934242.1
ChrX_112727741_112741438	Pig.04480	0.236013	-2.08306	0.00215377	0.0689941	yes	down	0.163576	0.0843486	0.142477	0.0687522	0.0443835	0.102465	0.130134	0.0718669	HPRT1-201	hypoxanthine-guanine phosphoribosyltransferase isoform X1 [Sus scrofa]	XP_020935162.1
ChrX_11445105_11457569	Pig.06016	28.9815	4.85706	0.000335458	0.0175473	yes	up	0	0	0	0.0962531	0.0813698	0.0709372	0	0.0828534	WWC3-201	protein WWC3 [Sus scrofa]	XP_013841331.2
ChrX_123480676_123481521	Pig.18741	25.6249	4.67948	0.00595094	0.130852	yes	up	0	0	0	0.0756274	0.0813698	0.0630553	0	0.0733508	AFF2-201	AF4/FMR2 family member 2 isoform X3 [Sus scrofa]	XP_013839468.1
ChrX_16539567_16566142	Pig.05990	33.8478	5.08099	0.00610073	0.131882	yes	up	0	0	0	0.0756274	0.059178	0.157638	0	0.0974812	PIR-201	pirin [Sus scrofa]	XP_003134991.1
ChrX_21050389_21065144	Pig.01775	12.3695	3.62872	0.00151763	0.0527065	yes	up	0.0125828	0	0	0.15813	0.147945	0.0709372	0.00419426	0.125671	RPS6KA3-201	ribosomal protein S6 kinase alpha-3 isoform 1 [Mus musculus]	EDL40821.1
ChrX_32827680_32872783	Pig.01823	22.2331	4.47464	0.00595021	0.130852	yes	up	0	0	0	0.0756274	0.0369863	0.0788191	0	0.0638109	DMD-205	dystrophin isoform X1 [Sus scrofa]	XP_020935207.1
ChrX_45213981_45219005	MSTRG.41530	0.0752972	-3.73126	0.00339396	0.0927756	yes	down	0.113245	0.0843486	0.055752	0.0206257	0	0.0236457	0.0844486	0.0147571	0	0	XP_020922221.1
Scaffold109_2537105_2542457	MSTRG.42720,Pig.10028	9.54589	3.25488	0.0225471	0.297097	yes	up	0	0	0	0.0206257	0	0.0630553	0	0.0278937	#N/A	#N/A	#N/A
Scaffold118_1738308_1756270	Pig.10801	16.3051	4.02725	0.0180414	0.261908	yes	up	0	0	0	0.0550017	0.0147945	0.0709372	0	0.0469112	RUNX1T1-202	PREDICTED: protein CBFA2T1 isoform X2 [Otolemur garnettii]	XP_019480529.1
Scaffold118_6020664_6039588		2.24639	1.16761	0.0145759	0.227309	yes	up	0.031457	0.0383403	0.0619467	0.288759	0.199726	0.20493	0.0439146	0.231138	#N/A	#N/A	#N/A
Scaffold124_4831155_4833774	Pig.11264	0.0328529	-4.92784	0.00421722	0.110984	yes	down	0.0125828	0.0153361	0.0247787	0	0	0	0.0175659	0	HNRNPH3-201	PREDICTED: heterogeneous nuclear ribonucleoprotein H3 isoform X2 [Equus przewalskii]	XP_008505148.1
Scaffold155_2126498_2131936	Pig.12790	13.7998	3.78658	0.022385	0.296392	yes	up	0	0	0	0.0343761	0.029589	0.0551734	0	0.0397128	PDCD6IP	programmed cell death 6-interacting protein isoform X1 [Sus scrofa]	XP_020927280.1
Scaffold155_4251629_4267749	MSTRG.43205,Pig.12793	0.0350359	-4.83502	0.0250609	0.309818	yes	down	0	0.0306722	0.018584	0	0	0	0.0164187	0	#N/A	#N/A	#N/A
Scaffold155_4873178_4891253	Pig.12801	0.227983	-2.133	0.0228931	0.298157	yes	down	0.125828	0.0843486	0.0681414	0.0550017	0.0443835	0.0472915	0.0927726	0.0488923	ITGA9-201	integrin alpha-9 isoform X2 [Sus scrofa]	XP_020927318.1
Scaffold288_854949_855512	Pig.17809	7.35542	2.87881	0.0494205	0.427336	yes	up	0	0.0153361	0	0.110003	0.029589	0.102465	0.00511203	0.0806858	LAPTM4B-202	lysosomal-associated transmembrane protein 4B [Sus scrofa]	XP_005655413.3
Scaffold355_436107_438855	Pig.19337	9.44903	3.24017	0.0399485	0.38122	yes	up	0	0	0	0.0206257	0.0369863	0.0236457	0	0.0270859	SCMH1-201	polycomb protein SCMH1 isoform X1 [Sus scrofa]	XP_020952602.1
Scaffold4454_7885_7985	MSTRG.44768	0.104167	-3.26303	0.0138213	0.21793	yes	down	0.251656	0	0.210619	0.0343761	0.029589	0.0472915	0.154092	0.0370855	0	0	AMB36376.1
Scaffold4454_9792_9891	MSTRG.44768	0.234124	-2.09465	0.0186683	0.266905	yes	down	0.213907	0.0153361	0.0991147	0.0481265	0.0887671	0.0394096	0.109453	0.0587677	0	0	AMB36376.1

## Sheet: N30_F vs N150D_F_DEcircRNAs
circRNA id	Host gene id	FC(N150D_F/N30D_F)	Log2FC(N150D_F/N30D_F)	Pvalue	Padjust	Significant	Regulate	N30D_F1	N30D_F2	N30D_F3	N150D_F1	N150D_F2	N150D_F3	N30D_F	N150D_F	gene_name	description	nr_hit_name
Chr01_113095581_113113174	Pig.03374	11.1365	3.47723	0.0198583	0.0963044	yes	up	0	0	0.0123893	0.053119	0.0983259	0.12373	0.00412978	0.0917249	ZCCHC2-201	zinc finger CCHC domain-containing protein 2 [Sus scrofa]	XP_020955289.1
Chr01_113113103_113118487	Pig.03374	0.358471	-1.48007	0.0495311	0.179668	yes	down	0.0503312	0.0843486	0.0495574	0.0708254	0.049163	0	0.0614124	0.0399961	ZCCHC2-201	zinc finger CCHC domain-containing protein 2 [Sus scrofa]	XP_020955289.1
Chr01_1187216_1191546	Pig.03783	0.274489	-1.86518	0.000405995	0.00486943	yes	down	0.125828	0.214705	0.167256	0.0442659	0.147489	0.0707027	0.169263	0.0874858	DNAJC25-201	dnaJ homolog subfamily C member 25 [Sus scrofa]	XP_020923138.1
Chr01_120321631_120333334	Pig.03428	5.24857	2.39192	0.0352282	0.141237	yes	up	0.0188742	0	0	0.0796785	0.0819383	0.0265135	0.00629139	0.0627101	PIAS1-201	E3 SUMO-protein ligase PIAS1 [Sus scrofa]	XP_003121797.3
Chr01_127279986_127292153	Pig.14349	12.5238	3.6466	0.025848	0.112835	yes	up	0	0	0	0.0177063	0.0245815	0.0441892	0	0.0288257	ZNF106-201	zinc finger protein 106 isoform X1 [Sus scrofa]	XP_005659765.1
Chr01_129021689_129022227	Pig.14315	0.082828	-3.59374	0.0229625	0.104898	yes	down	0	0.0536764	0.111504	0	0	0.0265135	0.0550601	0.00883784	CASC4-201	protein CASC4 isoform X1 [Sus scrofa]	XP_020952200.1
Chr01_129539644_129544125	MSTRG.1761,Pig.14306	0.0588533	-4.08673	4.23378e-09	3.00008e-07	yes	down	0.195033	0.222373	0.204424	0	0.0245815	0.0441892	0.207277	0.0229236	#N/A	#N/A	#N/A
Chr01_140733143_140759222	Pig.02266	27.4158	4.77693	0.000543434	0.00615555	yes	up	0	0	0	0.0619722	0.0819383	0.0441892	0	0.0626999	TEX9-202	testis-expressed sequence 9 protein [Sus scrofa]	NP_001231528.1
Chr01_143206410_143210729	Pig.02254	5.28006	2.40056	2.64081e-22	2.01164e-19	yes	up	0.440398	0.498423	0.27876	4.03705	3.4496	4.26868	0.40586	3.91844	SLTM-201	SAFB-like transcription modulator isoform X2 [Sus scrofa]	XP_020929243.1
Chr01_149573571_149585170		0.00581051	-7.42712	0.0035511	0.0256403	yes	down	0.207616	0.176365	0.0619467	0	0	0	0.148643	0	#N/A	#N/A	#N/A
Chr01_149573571_149621592		0.0241078	-5.37435	0.000107988	0.00167878	yes	down	0.0440398	0.0383403	0.0247787	0	0	0	0.0357196	0	#N/A	#N/A	#N/A
Chr01_149573571_149644642		0.0202998	-5.62239	7.31641e-05	0.00125642	yes	down	0.031457	0.0383403	0.055752	0	0	0	0.0418497	0	#N/A	#N/A	#N/A
Chr01_149643366_149644642		0.00810956	-6.94616	2.85077e-07	1.31611e-05	yes	down	0.0817881	0.161029	0.074336	0	0	0	0.105718	0	#N/A	#N/A	#N/A
Chr01_150155875_150158392	Pig.02205	2.22729	1.15529	0.00164363	0.0143912	yes	up	0.138411	0.138025	0.123893	0.274448	0.589956	0.813081	0.133443	0.559162	WDR7-201	WD repeat-containing protein 7 isoform X1 [Sus scrofa]	XP_020949254.1
Chr01_150306573_150322228	Pig.02204	16.7347	4.06477	0.0428535	1	yes	up	0	0	0	0.0885317	0	0.0176757	0	0.0354025	TXNL1-202	thioredoxin-like protein 1 isoform X1 [Castor canadensis]	XP_020042489.1
Chr01_151532417_151542472	Pig.02203	49.7421	5.63639	6.77049e-05	0.00118561	yes	up	0	0	0	0.0973849	0.139295	0.106054	0	0.114245	TCF4-206	transcription factor 4 isoform X1 [Sus scrofa]	XP_020949090.1
Chr01_151532417_151559030	Pig.02203	6.20718	2.63394	0.00573216	0.037031	yes	up	0.0377484	0	0	0.177063	0.10652	0.150243	0.0125828	0.144609	TCF4-206	transcription factor 4 isoform X1 [Sus scrofa]	XP_020949090.1
Chr01_162166054_162169510	Pig.08979	18.1532	4.18215	2.59766e-10	2.32796e-08	yes	up	0.0251656	0.0230042	0.0433627	0.717107	1.20449	1.2373	0.0305108	1.05297	SETBP1-201	SET-binding protein isoform X1 [Sus scrofa]	XP_013844009.2
Chr01_176366641_176466186	Pig.00707	78.6434	6.29725	0.00102258	0.0100835	yes	up	0	0	0	0.0619722	0.180264	0.309324	0	0.183854	ME1-201	NADP-dependent malic enzyme [Sus scrofa]	XP_001924368.2
Chr01_176448874_176463214	Pig.00707	75.3884	6.23627	0.00198637	0.0162701	yes	up	0	0	0	0.159357	0.180264	0.176757	0	0.172126	ME1-201	NADP-dependent malic enzyme [Sus scrofa]	XP_001924368.2
Chr01_176448874_176466186	Pig.00707	2471.15	11.271	8.99332e-17	3.04474e-14	yes	up	0	0	0	4.58594	6.25189	6.19533	0	5.67772	ME1-201	NADP-dependent malic enzyme [Sus scrofa]	XP_001924368.2
Chr01_176448874_176514079	Pig.00707	37.3399	5.22265	0.0397086	0.153739	yes	up	0	0	0	0.0885317	0.114714	0.053027	0	0.0854241	ME1-201	NADP-dependent malic enzyme [Sus scrofa]	XP_001924368.2
Chr01_182096958_182103661	Pig.00734	8.87474	3.14971	0.0201741	0.0970071	yes	up	0	0.0153361	0	0.0442659	0.0819383	0.106054	0.00511203	0.0774194	REV3L-201	DNA polymerase zeta catalytic subunit isoform X1 [Sus scrofa]	XP_020946897.1
Chr01_182281645_182282104	Pig.00736	8.50487	3.08829	0.00583876	0.0374541	yes	up	0	0.0153361	0	0.0354127	0.0901321	0.0883784	0.00511203	0.0713077	SLC16A10-202	monocarboxylate transporter 10 isoform X1 [Sus scrofa]	XP_020946871.1
Chr01_182642754_182716683	Pig.00740	0.0419138	-4.57643	0.000193184	0.00276353	yes	down	0.113245	0.0536764	0.055752	0	0	0.0176757	0.0742245	0.00589189	CDK19-201	PREDICTED: cyclin-dependent kinase 19-like isoform X1 [Elephantulus edwardii]	XP_020946795.1
Chr01_182760362_182767594	Pig.00740	0.227686	-2.13488	0.000329305	0.00412918	yes	down	0.125828	0.0613444	0.0991147	0.0442659	0.0245815	0.053027	0.095429	0.0406248	CDK19-201	PREDICTED: cyclin-dependent kinase 19-like isoform X1 [Elephantulus edwardii]	XP_020946795.1
Chr01_186637766_186642905	MSTRG.2535,Pig.00772	0.0327419	-4.93272	0.0226736	0.10436	yes	down	0.0188742	0.0153361	0.0433627	0	0	0	0.0258577	0	#N/A	#N/A	#N/A
Chr01_193069663_193076656	Pig.00796	9.94817	3.31443	0.0444869	0.166935	yes	up	0.0125828	0	0	0.0885317	0.0737444	0.0707027	0.00419426	0.0776596	PNISR-201	SR rich protein, partial [Homo sapiens]	NP_001106910.1
Chr01_207420625_207465177	Pig.00864	0.222661	-2.16708	0.00109994	0.0105661	yes	down	0.446689	0.306722	0.507963	0.141651	0.122907	0.256297	0.420458	0.173619	RIMS1-201	regulating synaptic membrane exocytosis protein 1 isoform X9 [Sus scrofa]	XP_020928548.1
Chr01_214379127_214383038		0.13397	-2.90001	4.04289e-14	7.69919e-12	yes	down	0.635431	0.283718	0.377875	0.053119	0.155683	0.114892	0.432341	0.107898	#N/A	#N/A	#N/A
Chr01_214380720_214383038		0.0870162	-3.52257	1.32595e-20	8.08034e-18	yes	down	0.836755	0.483087	0.74336	0.0708254	0.122907	0.141405	0.687734	0.111713	#N/A	#N/A	#N/A
Chr01_214381281_214383035		0.0575903	-4.11803	0.000477203	0.00557103	yes	down	0.0880795	0.0996847	0.055752	0	0	0.0265135	0.0811721	0.00883784	#N/A	#N/A	#N/A
Chr01_214381281_214383038		0.180813	-2.46743	5.35378e-05	0.000953974	yes	down	0.176159	0.138025	0.123893	0.0619722	0.0573568	0.0265135	0.146026	0.0486142	#N/A	#N/A	#N/A
Chr01_225853573_225876920	Pig.04001	52.2242	5.70665	0.00171244	0.014908	yes	up	0	0	0	0.115091	0.155683	0.0883784	0	0.119717	ARHGAP18-201	rho GTPase-activating protein 18 isoform X4 [Sus scrofa]	XP_020944089.1
Chr01_225864275_225876920	Pig.04001	25.3923	4.66632	0.00463524	0.0315964	yes	up	0	0	0	0.0265595	0.0901321	0.0618649	0	0.0595188	ARHGAP18-201	rho GTPase-activating protein 18 isoform X4 [Sus scrofa]	XP_020944089.1
Chr01_225868396_225876920	Pig.04001	19.9673	4.31957	0.00635712	0.0402706	yes	up	0	0	0	0.0354127	0.049163	0.053027	0	0.0458676	ARHGAP18-201	rho GTPase-activating protein 18 isoform X4 [Sus scrofa]	XP_020944089.1
Chr01_228240804_228242964	Pig.04015	0.0112376	-6.47552	2.68033e-06	8.50727e-05	yes	down	0.0754967	0.0460083	0.105309	0	0	0	0.0756048	0	MOXD1-201	LOW QUALITY PROTEIN: DBH-like monooxygenase protein 1 [Sus scrofa]	XP_001926966.2
Chr01_237261552_237265394	Pig.05210	0.0120277	-6.3775	2.06199e-06	6.75578e-05	yes	down	0.0566225	0.0690125	0.0867254	0	0	0	0.0707868	0	ADGRG6-201	adhesion G-protein coupled receptor G6 isoform X1 [Sus scrofa]	XP_020942830.1
Chr01_239111391_239126201	Pig.05196	25.507	4.67282	0.00900595	0.0520565	yes	up	0	0	0	0.0442659	0.0327753	0.0972162	0	0.0580858	UTRN	utrophin isoform X4 [Sus scrofa]	XP_020927918.1
Chr01_239113353_239126201	Pig.05196	40.5849	5.34287	0.0251428	1	yes	up	0	0	0	0.0708254	0.0655506	0.141405	0	0.0925938	UTRN	utrophin isoform X4 [Sus scrofa]	XP_020927918.1
Chr01_245876855_245917642	Pig.17502	0.0145057	-6.10723	0.000358931	0.00442778	yes	down	0.0440398	0.0383403	0.09292	0	0	0	0.0584333	0	ESR1-201	estrogen receptor isoform X1 [Sus scrofa]	XP_020938661.1
Chr01_245959680_245960754	Pig.17502	0.00726955	-7.10392	3.85996e-07	1.70453e-05	yes	down	0.106954	0.115021	0.130088	0	0	0	0.117354	0	ESR1-201	estrogen receptor isoform X1 [Sus scrofa]	XP_020938661.1
Chr01_248338604_248340068		6.95786	2.79864	0.0487575	0.178134	yes	up	0	0	0.0247787	0.053119	0.196652	0.0972162	0.00825956	0.115662	#N/A	#N/A	#N/A
Chr01_250407540_250460068	Pig.09625	0.222065	-2.17095	0.0203307	0.0972491	yes	down	0.0629139	0.0153361	0.0433627	0	0.0245815	0.0265135	0.0405376	0.0170317	ARID1B-201	AT-rich interactive domain-containing protein 1B isoform X5 [Sus scrofa]	XP_020927546.1
Chr01_250407540_250490265	Pig.09625	0.0433097	-4.52917	0.0175317	0.0870017	yes	down	0.0188742	0.0153361	0.0247787	0	0	0	0.019663	0	ARID1B-201	AT-rich interactive domain-containing protein 1B isoform X5 [Sus scrofa]	XP_020927546.1
Chr01_252818176_252821951	MSTRG.3267,Pig.09649,MSTRG.3268	0.431157	-1.21372	0.0386142	0.150843	yes	down	0.150993	0.0383403	0.105309	0.0619722	0.0245815	0.150243	0.0982144	0.0789323	#N/A	#N/A	#N/A
Chr01_253340828_253344572	MSTRG.3284,Pig.09657	0.0135189	-6.20888	0.00105169	0.0102381	yes	down	0	0.0613444	0.123893	0	0	0	0.0617459	0	#N/A	#N/A	#N/A
Chr01_255681370_255681512	MSTRG.3307,Pig.16879	18.1022	4.1781	0.0153585	0.0793174	yes	up	0	0	0	0.0265595	0.0737444	0.0265135	0	0.0422725	#N/A	#N/A	#N/A
Chr01_25846709_25885179		3.08116	1.62348	0.00154263	0.0137038	yes	up	0.0503312	0.0690125	0.0495574	0.407246	0.254009	0.282811	0.0563003	0.314688	#N/A	#N/A	#N/A
Chr01_258858384_258867484	Pig.14662	0.464554	-1.10608	0.00688584	0.0421308	yes	down	0.239073	0.483087	0.439821	0.265595	0.442467	0.309324	0.387327	0.339129	AFDN-201	afadin isoform X5 [Sus scrofa]	XP_020941446.1
Chr01_28732821_28737849		17.7462	4.14944	0.0081109	0.0479882	yes	up	0	0	0	0.0265595	0.0983259	0	0	0.0416285	#N/A	#N/A	#N/A
Chr01_32467155_32487321	Pig.03310	13.4636	3.75099	0.0131785	0.0700781	yes	up	0	0	0	0	0.0327753	0.0618649	0	0.0315467	CBWD1	COBW domain-containing protein 2 isoform X1 [Sus scrofa]	XP_001924427.4
Chr01_3467978_3519068	Pig.03801	4.44587	2.15247	0.00518817	0.0342172	yes	up	0.0125828	0.0153361	0.018584	0.141651	0.0983259	0.141405	0.015501	0.127127	TMEM245-202	transmembrane protein 245 isoform X1 [Sus scrofa]	XP_005660377.1
Chr01_45881287_45948770	Pig.03265	41.1761	5.36374	0.00978975	0.0550341	yes	up	0	0	0	0.0619722	0.0901321	0.132568	0	0.0948906	NFIB-201	nuclear factor 1 B-type isoform X1 [Odocoileus virginianus texanus]	XP_004276171.1
Chr01_47916059_47918028	Pig.03256	122.011	6.93087	2.47828e-07	1.21795e-05	yes	up	0	0	0	0.132798	0.303172	0.415378	0	0.283783	BNC2-202	zinc finger protein basonuclin-2 isoform X1 [Sus scrofa]	XP_020918949.1
Chr01_5158032_5164452	Pig.03809	2.07205	1.05106	0.0156367	0.0802508	yes	up	0.119536	0.115021	0.0805307	0.433805	0.467048	0.300487	0.105029	0.400447	RAD23B-201	PREDICTED: UV excision repair protein RAD23 homolog B isoform X1 [Pteropus alecto]	XP_001927901.1
Chr01_5163195_5164452	Pig.03809	27.904	4.8024	0.00505341	0.0335215	yes	up	0	0	0	0.0265595	0.0245815	0.141405	0	0.0641821	RAD23B-201	PREDICTED: UV excision repair protein RAD23 homolog B isoform X1 [Pteropus alecto]	XP_001927901.1
Chr01_60347488_60357381	Pig.05431	0.20777	-2.26694	0.028918	0.121535	yes	down	0.0440398	0.0383403	0.0681414	0.0177063	0.0409691	0	0.0501738	0.0195585	SYNE2-201	nesprin-2 isoform X1 [Sus scrofa]	XP_020929775.1
Chr01_64609502_64632618	Pig.05408	8.23998	3.04264	0.0153319	0.0793147	yes	up	0.0125828	0	0	0.0708254	0.0573568	0.0707027	0.00419426	0.066295	MNAT1-201	CDK-activating kinase assembly factor MAT1 [Sus scrofa]	NP_001159788.1
Chr01_71798631_71831568	Pig.02917	6.36171	2.66941	0.000467256	0.00547588	yes	up	0.0629139	0	0.0247787	0.336421	0.327753	0.380027	0.0292309	0.348067	DDHD1-201	phospholipase DDHD1 isoform X5 [Sus scrofa]	XP_003121845.1
Chr01_72779231_72783251	Pig.02907	17.388	4.12002	4.89086e-05	0.000892362	yes	up	0	0	0.0247787	0.185917	0.319559	0.353514	0.00825956	0.28633	NID2-201	nidogen-2 isoform X1 [Sus scrofa]	XP_020957573.1
Chr01_7398798_7408988	Pig.03818	0.183814	-2.44368	0.025833	0.112835	yes	down	0.119536	0.0230042	0.0123893	0.0177063	0.0163877	0.0176757	0.0516433	0.0172566	ABCA1-201	ATP-binding cassette sub-family A member 1 [Sus scrofa]	NP_001304009.1
Chr01_74523778_74537105	Pig.02889	11.4929	3.52267	0.0443164	0.166706	yes	up	0	0	0	0.0442659	0.0327753	0	0	0.0256804	SOS2-201	son of sevenless homolog 2 [Sus scrofa]	XP_020957098.1
Chr01_84804013_84812312	Pig.02859	0.0171429	-5.86625	1.8183e-05	0.000413461	yes	down	0.0692053	0.0306722	0.0495574	0	0	0	0.0498116	0	MIA2	melanoma inhibitory activity protein 2 isoform X2 [Sus scrofa]	XP_020929628.1
Chr01_85074434_85082125		20.318	4.34469	0.00186407	0.0157263	yes	up	0	0	0	0.0442659	0.0327753	0.0618649	0	0.046302	#N/A	#N/A	#N/A
Chr01_85074434_85093387		17.7955	4.15344	0.00343268	0.0252033	yes	up	0	0	0	0.0354127	0.0245815	0.0618649	0	0.0406197	#N/A	#N/A	#N/A
Chr01_87757404_87763045	Pig.02840	33.5139	5.06669	0.000829066	0.00862172	yes	up	0	0	0	0.0796785	0.0409691	0.106054	0	0.0755673	NOX5-201	NADPH oxidase 5 isoform X2 [Sus scrofa]	XP_020956203.1
Chr01_88880418_88881721	Pig.02830	0.0268009	-5.22157	0.00842202	1	yes	down	0.031457	0.0460083	0.018584	0	0	0	0.0320164	0	COG3-204	PREDICTED: kidney mitochondrial carrier protein 1 isoform X1 [Camelus dromedarius]	XP_005896811.1
Chr01_89458208_89475492	Pig.02825	0.0136012	-6.20012	4.15736e-05	0.000786799	yes	down	0.0440398	0.0306722	0.111504	0	0	0	0.062072	0	CPB2-201	carboxypeptidase B2 [Sus scrofa]	XP_001929181.1
Chr01_89458208_89480626	Pig.02825	0.0311232	-5.00587	0.00703662	0.0427955	yes	down	0.0377484	0.0460083	0	0	0	0	0.0279189	0	CPB2-201	carboxypeptidase B2 [Sus scrofa]	XP_001929181.1
Chr01_89463756_89483212	Pig.02825	0.022783	-5.4559	0.0211152	0.0998374	yes	down	0.0251656	0.0306722	0.055752	0	0	0	0.0371966	0	CPB2-201	carboxypeptidase B2 [Sus scrofa]	XP_001929181.1
Chr01_89715558_89717688	Pig.02822	44.7102	5.48253	4.25997e-05	0.000801243	yes	up	0	0	0	0.0265595	0.155683	0.132568	0	0.104937	RUBCNL-201	protein RUBCNL-like isoform X1 [Sus scrofa]	XP_020921247.1
Chr01_91059587_91060357	Pig.02815	13.9294	3.80006	0.0419159	1	yes	up	0	0	0	0.0265595	0.0245815	0.0441892	0	0.0317767	SUCLA2-201	succinate--CoA ligase [ADP-forming]	XP_020921243.1
Chr01_99667043_99684106	Pig.13147	0.0207785	-5.58876	0.00115226	0.0108028	yes	down	0.0377484	0.0613444	0.0247787	0	0	0	0.0412905	0	PCSK6-201	proprotein convertase subtilisin/kexin type 6 isoform X4 [Sus scrofa]	XP_020954610.1
Chr01_99680098_99684106	Pig.13147	0.0266714	-5.22856	1.30378e-05	0.000325624	yes	down	0.0880795	0.199369	0.0681414	0.0177063	0	0	0.11853	0.00590211	PCSK6-201	proprotein convertase subtilisin/kexin type 6 isoform X4 [Sus scrofa]	XP_020954610.1
Chr01_99746614_99750761	Pig.13147	0.0385558	-4.69691	0.0280328	0.118798	yes	down	0.0251656	0.0230042	0.018584	0	0	0	0.0222512	0	PCSK6-201	proprotein convertase subtilisin/kexin type 6 isoform X4 [Sus scrofa]	XP_020954610.1
Chr02_108647660_108671148	Pig.09900	12.6295	3.65872	0.0413955	0.158765	yes	up	0	0	0	0.0442659	0.0409691	0	0	0.0284117	MRVI1-207	protein MRVI1 isoform X3 [Sus scrofa]	XP_013850014.1
Chr02_120685153_120715387	Pig.05931	0.0186627	-5.7437	4.08443e-05	0.000786799	yes	down	0.0503312	0.0306722	0.055752	0	0	0	0.0455851	0	GAS2-201	growth arrest-specific protein 2 [Sus scrofa]	XP_020938899.1
Chr02_129557508_129571492	Pig.12557	0.0293302	-5.09147	0.000900569	0.00927039	yes	down	0.0125828	0.0306722	0.0433627	0	0	0	0.0288726	0	QSER1-205	glutamine and serine-rich protein 1 [Sus scrofa]	XP_013849914.1
Chr02_129618137_129623462	Pig.12558	0.012633	-6.30666	7.68771e-06	0.000209147	yes	down	0.0880795	0.0536764	0.0619467	0	0	0	0.0679009	0	DEPDC7-201	DEP domain-containing protein 7 [Sus scrofa]	XP_020938868.1
Chr02_129885485_129886586		4.01392	2.00501	0.0336915	0.136332	yes	up	0.0125828	0.0306722	0	0.0973849	0.0573568	0.150243	0.0144183	0.101662	#N/A	#N/A	#N/A
Chr02_130989369_130994154	Pig.12571	0.0325934	-4.93928	0.00790754	0.0471512	yes	down	0.0377484	0.0230042	0.018584	0	0	0	0.0264455	0	CAT-201	catalase [Sus scrofa]	NP_999466.2
Chr02_130990677_130992200	Pig.12571	0.0178501	-5.80792	0.000200207	0.00278655	yes	down	0.0692053	0.0383403	0.037168	0	0	0	0.0482379	0	CAT-201	catalase [Sus scrofa]	NP_999466.2
Chr02_130990677_131007514	Pig.12571	0.249002	-2.00577	1.86174e-05	0.000414067	yes	down	0.679471	0.5521	0.538936	0.0885317	0.294978	0.45073	0.590169	0.27808	CAT-201	catalase [Sus scrofa]	NP_999466.2
Chr02_130998705_131007514	Pig.12571	0.101656	-3.29823	0.000773404	0.0081542	yes	down	0.0503312	0.306722	0.247787	0.053119	0.0163877	0.0441892	0.201613	0.0378986	CAT-201	catalase [Sus scrofa]	NP_999466.2
Chr02_130998705_131012754	Pig.12571	0.0429813	-4.54015	0.000988791	0.00994339	yes	down	0.0440398	0.0690125	0.09292	0	0.0163877	0	0.0686574	0.00546255	CAT-201	catalase [Sus scrofa]	NP_999466.2
Chr02_13778027_13783009	Pig.14542	31.9528	4.99787	0.000200281	0.00278655	yes	up	0	0	0	0.0708254	0.0409691	0.106054	0	0.0726162	SMAD1-201	SMAD5 [Homo sapiens]	ELR59268.1
Chr02_138667128_138670999	Pig.12692	0.232719	-2.10334	0.000717683	0.00767807	yes	down	0.0817881	0.161029	0.154867	0.0708254	0.0655506	0.0353514	0.132561	0.0572424	TTC17-201	tetratricopeptide repeat protein 17 isoform X1 [Sus scrofa]	XP_020938829.1
Chr02_142242602_142243343		0.287688	-1.79742	2.91759e-06	8.97968e-05	yes	down	0.377484	0.559768	0.551326	0.141651	0.360528	0.309324	0.496192	0.270501	#N/A	#N/A	#N/A
Chr02_147307278_147309580	MSTRG.6341,Pig.14874	0.0292449	-5.09567	0.0247917	1	yes	down	0.0377484	0.0383403	0.0123893	0	0	0	0.0294927	0	#N/A	#N/A	#N/A
Chr02_15132030_15165811	Pig.17377	21.8287	4.44815	0.00308498	0.0229827	yes	up	0	0	0	0.0265595	0.0819383	0.0441892	0	0.0508957	SEC24A-201	protein transport protein Sec24A [Sus scrofa]	NP_001230853.1
Chr02_15143170_15165811	Pig.17377	3.23978	1.6959	0.0490316	0.178664	yes	up	0.0251656	0	0.0247787	0.0619722	0.147489	0.106054	0.0166481	0.105172	SEC24A-201	protein transport protein Sec24A [Sus scrofa]	NP_001230853.1
Chr02_15165110_15165811	Pig.17377	59.9612	5.90596	0.0146691	0.0766614	yes	up	0	0	0	0.177063	0.204846	0.0265135	0	0.136141	SEC24A-201	protein transport protein Sec24A [Sus scrofa]	NP_001230853.1
Chr02_152254104_152319280		0.00269798	-8.5339	3.3523e-10	2.91841e-08	yes	down	0.308278	0.23771	0.402653	0	0	0	0.316214	0	#N/A	#N/A	#N/A
Chr02_152270778_152273957	Pig.19118	0.00454906	-7.78022	8.52406e-10	6.6597e-08	yes	down	0.257947	0.115021	0.192035	0	0	0	0.188334	0	SLC22A9	solute carrier family 22 member 9-like isoform X1 [Sus scrofa]	XP_020938567.1
Chr02_152460499_152462463	Pig.19123	0.107183	-3.22185	0.0323861	0.132687	yes	down	0.0503312	0.0383403	0	0	0	0.0176757	0.0295571	0.00589189	ATL3-201	atlastin-3 isoform X2 [Sus scrofa]	XP_013849639.1
Chr02_155120291_155121860	Pig.19962	12.6299	3.65878	0.0420201	0.160044	yes	up	0	0	0	0.0442659	0.0409691	0	0	0.0284117	LOC101153177	PREDICTED: RNA-binding protein 4 isoform X1 [Canis lupus familiaris]	TKC36575.1
Chr02_155636386_155663230	Pig.20857	3.88588	1.95824	1.31459e-06	4.60408e-05	yes	up	0.0692053	0.0843486	0.09292	0.522337	0.540793	0.715865	0.082158	0.592998	Gstp1	glutathione S-transferase P-like isoform X1 [Sus scrofa]	XP_020938401.1
Chr02_156944449_156984195		0.0988673	-3.33836	3.77718e-05	0.000740845	yes	down	0.157285	0.145693	0.408848	0.053119	0.0245815	0.053027	0.237275	0.0435759	#N/A	#N/A	#N/A
Chr02_158020903_158028723	Pig.17120	0.0148558	-6.07283	1.59356e-05	0.000370654	yes	down	0.0754967	0.0613444	0.037168	0	0	0	0.0580031	0	ANO1-204	anoctamin-1 isoform X1 [Sus scrofa]	XP_020938329.1
Chr02_158218_160472	Pig.21162	0.0435068	-4.52261	0.0453995	1	yes	down	0	0.0460083	0.0123893	0	0	0	0.0194659	0	NDST1-201	bifunctional heparan sulfate N-deacetylase/N-sulfotransferase 1 [Sus scrofa]	XP_020940682.1
Chr02_158504846_158523135		0.0342611	-4.86728	0.0480399	1	yes	down	0.031457	0	0.0433627	0	0	0	0.0249399	0	#N/A	#N/A	#N/A
Chr02_159713586_159713781		0.0292983	-5.09304	0.00185395	0.0156916	yes	down	0.0125828	0.0306722	0.0433627	0	0	0	0.0288726	0	#N/A	#N/A	#N/A
Chr02_161584456_161587851	Pig.20939	7.24706	2.8574	0.0174594	0.086926	yes	up	0	0	0.0123893	0.0354127	0.0737444	0.0707027	0.00412978	0.0599533	EHMT2-201	histone-lysine N-methyltransferase EHMT1 isoform X3 [Sus scrofa]	XP_020936858.1
Chr02_162778048_162784074	Pig.21711	0.159801	-2.64565	1.63838e-12	2.4077e-10	yes	down	0.685762	0.759137	0.867254	0.150504	0.270396	0.273973	0.770718	0.231624	RXRA-201	retinoic acid receptor RXR-alpha isoform X2 [Sus scrofa]	XP_020927110.1
Chr02_165109871_165120399	Pig.14619	26.7793	4.74304	0.00494199	0.0330951	yes	up	0	0	0	0.0442659	0.0983259	0.0441892	0	0.0622603	RAPGEF1-201	LOW QUALITY PROTEIN: rap guanine nucleotide exchange factor 1 [Sus scrofa]	XP_014637753.1
Chr02_166541573_166576722	Pig.14639	18.1865	4.1848	0.0263922	0.114358	yes	up	0	0	0	0.053119	0.0245815	0.0441892	0	0.0406299	FNBP1-201	LOW QUALITY PROTEIN: formin-binding protein 1 [Sus scrofa]	XP_020925807.1
Chr02_172506366_172520008	Pig.10190,MSTRG.7523	0.056029	-4.15768	0.0323388	1	yes	down	0.031457	0.0153361	0	0	0	0	0.0155977	0	#N/A	#N/A	#N/A
Chr02_18600695_18607910	Pig.12406	4.96948	2.31309	0.00163685	0.0143732	yes	up	0.0251656	0.0383403	0.018584	0.177063	0.294978	0.282811	0.0273633	0.251617	LYRM7-204	complex III assembly factor LYRM7 isoform X3 [Sus scrofa]	XP_020941079.1
Chr02_22409998_22415126	Pig.12386	0.320915	-1.63974	0.00093069	0.00954819	yes	down	0.119536	0.0843486	0.123893	0.0619722	0.0901321	0.0441892	0.109259	0.0654312	ALDH7A1-205	alpha-aminoadipic semialdehyde dehydrogenase [Sus scrofa]	XP_013850523.2
Chr02_33534085_33534503	Pig.05649	0.0527039	-4.24595	3.37195e-05	0.000671525	yes	down	0.125828	0.122689	0.105309	0	0	0.0353514	0.117942	0.0117838	KCNN2-201	small conductance calcium-activated potassium channel protein 2 isoform X2 [Sus scrofa]	XP_020940295.1
Chr02_37587799_37608291	Pig.05628	0.0323573	-4.94976	0.016385	1	yes	down	0.0503312	0.0306722	0	0	0	0	0.0270011	0	MAN2A1-205	alpha-mannosidase 2 [Sus scrofa]	XP_003123871.4
Chr02_37605171_37608291	Pig.05628	0.0197174	-5.66438	0.00858538	1	yes	down	0.0692053	0	0.0619467	0	0	0	0.0437173	0	MAN2A1-205	alpha-mannosidase 2 [Sus scrofa]	XP_003123871.4
Chr02_4961816_4965986	Pig.12013	2.28395	1.19153	0.0143988	0.0753836	yes	up	0.0377484	0.0306722	0.055752	0.221329	0.131101	0.176757	0.0413909	0.176396	PRELID2-202	PRELI domain-containing protein 2 isoform X1 [Sus scrofa]	XP_020940615.1
Chr02_4961816_4989928	Pig.12013	3.03486	1.60163	0.0234954	0.106375	yes	up	0.0251656	0.0230042	0.0123893	0.053119	0.139295	0.150243	0.0201864	0.114219	PRELID2-202	PRELI domain-containing protein 2 isoform X1 [Sus scrofa]	XP_020940615.1
Chr02_49759974_49766895		0.0672954	-3.89335	0.00154829	0.0137141	yes	down	0.0251656	0.0460083	0.0681414	0.0177063	0	0	0.0464384	0.00590211	#N/A	#N/A	#N/A
Chr02_56247505_56259953	Pig.02459	45.7395	5.51537	2.7287e-05	0.000569476	yes	up	0	0	0	0.115091	0.0901321	0.106054	0	0.103759	MEF2C-204	PREDICTED: myocyte-specific enhancer factor 2C isoform X2 [Sorex araneus]	XP_020937758.1
Chr02_56247708_56259953		16.6222	4.05504	0.00640755	0.0405058	yes	up	0	0	0	0	0.0737444	0.0441892	0	0.0393112	#N/A	#N/A	#N/A
Chr02_60658293_60663530	Pig.02468	48.7618	5.60768	0.00100035	0.00999368	yes	up	0	0	0	0.106238	0.131101	0.0972162	0	0.111519	VCAN-201	versican core protein isoform X1 [Sus scrofa]	XP_020936732.1
Chr02_63049093_63075028	MSTRG.4434,Pig.02480	3.18249	1.67015	0.024103	0.108321	yes	up	0.0125828	0.0153361	0.018584	0.0885317	0.0983259	0.0883784	0.015501	0.0917453	#N/A	#N/A	#N/A
Chr02_64288819_64298085	MSTRG.4458,MSTRG.4459,Pig.02491	0.0377325	-4.72805	4.13509e-05	0.000786799	yes	down	0.0817881	0.0996847	0.0619467	0	0.0163877	0	0.0811398	0.00546255	#N/A	#N/A	#N/A
Chr02_64288819_64310703	MSTRG.4458,MSTRG.4459,Pig.02491	0.0312067	-5.002	3.78864e-10	3.20666e-08	yes	down	0.257947	0.176365	0.161061	0	0	0.0353514	0.198458	0.0117838	#N/A	#N/A	#N/A
Chr02_64293568_64310703	MSTRG.4458,MSTRG.4459,Pig.02491	0.0783888	-3.67321	0.0108765	0.0596982	yes	down	0.0125828	0	0.018584	0	0	0	0.0103889	0	#N/A	#N/A	#N/A
Chr02_64347276_64350833	MSTRG.4458,MSTRG.4459,Pig.02491	0.048278	-4.37249	0.00500646	0.0334312	yes	down	0.0125828	0.0153361	0.0247787	0	0	0	0.0175659	0	#N/A	#N/A	#N/A
Chr02_64569831_64579384	MSTRG.4463,Pig.02493	0.02359	-5.40568	0.00191954	0.0160359	yes	down	0.0251656	0.0460083	0.037168	0	0	0	0.036114	0	#N/A	#N/A	#N/A
Chr02_64570850_64579384	MSTRG.4463,Pig.02493	0.0255137	-5.29259	0.0209716	1	yes	down	0.0125828	0.0306722	0.055752	0	0	0	0.0330023	0	#N/A	#N/A	#N/A
Chr02_64635810_64674168	Pig.02495	0.0185527	-5.75223	0.000222972	0.00306034	yes	down	0.0503312	0.0383403	0.0495574	0	0	0	0.0460763	0	DMGDH-201	dimethylglycine dehydrogenase, mitochondrial isoform X1 [Sus scrofa]	XP_020940139.1
Chr02_64735168_64740696	Pig.02496	0.0288225	-5.11666	0.00945359	0.0538413	yes	down	0.0125828	0.0383403	0.037168	0	0	0	0.0293637	0	ARSB-202	arylsulfatase B isoform X1 [Sus scrofa]	XP_020940137.1
Chr02_65229734_65239292	Pig.02498	0.0391086	-4.67637	0.0250479	1	yes	down	0.0188742	0.0153361	0.0309733	0	0	0	0.0217279	0	SCAMP1-202	secretory carrier-associated membrane protein 1 [Sus scrofa]	NP_999410.1
Chr02_66979806_66991420	Pig.02512	0.00672133	-7.21704	4.11441e-08	2.61179e-06	yes	down	0.138411	0.145693	0.0991147	0	0	0	0.127739	0	IQGAP2-201	LOW QUALITY PROTEIN: ras GTPase-activating-like protein IQGAP2 [Sus scrofa]	XP_020940121.1
Chr02_66979806_66998212	Pig.02512	0.0261455	-5.25729	0.000227255	0.0030954	yes	down	0.0440398	0.0230042	0.0309733	0	0	0	0.0326724	0	IQGAP2-201	LOW QUALITY PROTEIN: ras GTPase-activating-like protein IQGAP2 [Sus scrofa]	XP_020940121.1
Chr02_70309759_70310360	Pig.02537	28.5167	4.83374	0.00261272	0.0200024	yes	up	0	0	0	0.053119	0.0819383	0.0618649	0	0.0656407	FCHO2-204	F-BAR domain only protein 2 isoform X1 [Sus scrofa]	XP_020940096.1
Chr02_70913021_70914547	Pig.02543	3.77658	1.91708	0.00550425	0.0360676	yes	up	0.0503312	0.0306722	0	0.221329	0.254009	0.0795406	0.0270011	0.184959	SIMC1-201	SUMO-interacting motif-containing protein 1 isoform X1 [Sus scrofa]	XP_005661533.1
Chr02_80315127_80316205	Pig.12229	0.0120584	-6.37382	0.00017565	0.00256079	yes	down	0.0629139	0.0306722	0.117699	0	0	0	0.0704283	0	C3-201	complement C3 precursor [Sus scrofa]	XP_020936478.1
Chr02_80316000_80316205	Pig.12229	0.00818351	-6.93306	0.00933753	0.0533026	yes	down	0.113245	0.0766805	0.123893	0	0	0	0.104606	0	C3-201	complement C3 precursor [Sus scrofa]	XP_020936478.1
Chr02_80544596_80559692	Pig.12223	0.0314427	-4.99113	0.00205006	0.0167019	yes	down	0.0251656	0.0383403	0.018584	0	0	0	0.0273633	0	LOC101142995	putative adhesion G protein-coupled receptor E4P isoform X1 [Sus scrofa]	XP_020939603.1
Chr02_83909541_83910328	Pig.16212	0.0228023	-5.45468	8.62263e-05	0.00143569	yes	down	0.031457	0.0306722	0.0495574	0	0	0	0.0372288	0	LOC101123861	complement C3 [Sus scrofa]	XP_005654909.1
Chr02_84420990_84443541	Pig.16229	0.0128735	-6.27945	3.94991e-05	0.000766585	yes	down	0.0817881	0.0690125	0.0495574	0	0	0	0.066786	0	Pm20d1	N-fatty-acyl-amino acid synthase/hydrolase PM20D1 isoform X1 [Sus scrofa]	XP_005654890.3
Chr02_84431365_84436596	Pig.16229	0.0405607	-4.62377	0.0213274	1	yes	down	0.0125828	0.0383403	0.0123893	0	0	0	0.0211041	0	Pm20d1	N-fatty-acyl-amino acid synthase/hydrolase PM20D1 isoform X1 [Sus scrofa]	XP_005654890.3
Chr02_84439685_84443541	Pig.16229	0.0058416	-7.41942	6.43474e-08	4.00136e-06	yes	down	0.195033	0.161029	0.0867254	0	0	0	0.147596	0	Pm20d1	N-fatty-acyl-amino acid synthase/hydrolase PM20D1 isoform X1 [Sus scrofa]	XP_005654890.3
Chr02_92734565_92744854	MSTRG.5482	0.276345	-1.85546	0.00152142	0.0135946	yes	down	0.201325	0.115021	0.136283	0.0442659	0.0655506	0.12373	0.150876	0.0778487	0	0	XP_020935332.1
Chr02_92738870_92744854	MSTRG.5482	0.133928	-2.90047	2.5191e-29	7.6757e-26	yes	down	0.824173	0.774473	0.792918	0.185917	0.17207	0.238622	0.797188	0.19887	0	0	XP_020935332.1
Chr02_93615090_93617607	Pig.06399	0.0401003	-4.64024	0.0405575	1	yes	down	0	0	0.0619467	0	0	0	0.0206489	0	AP1M1-201	AP-1 complex subunit mu-1 isoform 2 [Homo sapiens]	NP_115882.1
Chr02_94511117_94513357	Pig.06384	18.5404	4.2126	0.0428677	1	yes	up	0	0	0	0.0177063	0.0409691	0.0707027	0	0.0431261	MYO9B-201	LOW QUALITY PROTEIN: unconventional myosin-IXb [Sus scrofa]	XP_020939234.1
Chr02_95298630_95299695	Pig.06350	0.141793	-2.81814	1.19028e-06	4.2668e-05	yes	down	0.144702	0.145693	0.198229	0.053119	0.049163	0.0265135	0.162875	0.0429318	MAST3-201	microtubule-associated serine/threonine-protein kinase 3 isoform X3 [Sus scrofa]	XP_020939140.1
Chr02_96418304_96421395	MSTRG.5708,Pig.06308	0.42948	-1.21934	0.0384717	0.150479	yes	down	0.0943709	0.0920166	0.130088	0.115091	0.0737444	0.0618649	0.105492	0.0835669	#N/A	#N/A	#N/A
Chr02_9881151_9888358	MSTRG.3627,Pig.20189	0.033905	-4.88236	0.0489098	1	yes	down	0.0251656	0.0383403	0.0123893	0	0	0	0.0252984	0	#N/A	#N/A	#N/A
Chr03_105249966_105263420	Pig.16535	8.71015	3.1227	0.0242062	0.108625	yes	up	0	0	0.0123893	0.106238	0.0573568	0.0441892	0.00412978	0.0692613	CLEC16A-201	protein CLEC16A isoform X1 [Sus scrofa]	XP_020942272.1
Chr03_105960945_105982265	MSTRG.9694,Pig.17769	0.119707	-3.06243	0.000948159	0.00969477	yes	down	0.0817881	0.0613444	0.0495574	0.0177063	0.0245815	0	0.06423	0.0140959	#N/A	#N/A	#N/A
Chr03_106100779_106116832	Pig.17772	14.8804	3.89534	0.049468	1	yes	up	0	0	0	0.0354127	0.049163	0.0176757	0	0.0340838	GSPT1-202	eukaryotic peptide chain release factor GTP-binding subunit ERF3A isoform X1 [Sus scrofa]	XP_020942248.1
Chr03_108726174_108734617	Pig.18781	3.22762	1.69047	0.0278135	0.118198	yes	up	0.0188742	0.0383403	0.0123893	0.132798	0.196652	0.0795406	0.0232013	0.13633	PARN-202	poly(A)-specific ribonuclease PARN isoform X1 [Sus scrofa]	XP_020942220.1(poly
Chr03_109907028_109909284	MSTRG.9767	0.00853636	-6.87216	1.40731e-07	7.39324e-06	yes	down	0.0754967	0.0996847	0.123893	0	0	0	0.0996916	0	0	0	XP_020942219.1
Chr03_111561487_111577057	Pig.11639	3.3441	1.74162	0.0397078	0.153739	yes	up	0	0	0.0433627	0.0885317	0.0901321	0.106054	0.0144542	0.094906	SMG1-201	serine/threonine-protein kinase SMG1 isoform X1 [Sus scrofa]	XP_020942206.1
Chr03_11292453_11297174	Pig.15943	17.139	4.09921	0.0223429	1	yes	up	0	0	0	0.0177063	0.049163	0.053027	0	0.0399654	NBAS-201	LOW QUALITY PROTEIN: neuroblastoma-amplified sequence [Sus scrofa]	XP_020943482.1
Chr03_116800433_116800867	Pig.16768	8.17705	3.03158	4.56221e-09	3.15933e-07	yes	up	0.031457	0.0383403	0.018584	0.336421	0.540793	0.45073	0.0294604	0.442648	TNRC6C-202	trinucleotide repeat-containing gene 6A protein isoform X4 [Sus scrofa]	XP_020936978.1
Chr03_118967715_118988965	Pig.17929	0.462662	-1.11197	0.00591468	0.037703	yes	down	0.138411	0.107353	0.130088	0.0796785	0.139295	0.106054	0.125284	0.108343	FAM120A-203	constitutive coactivator of PPAR-gamma-like protein 1 isoform X1 [Sus scrofa]	XP_020943836.1
Chr03_12146616_12147769	Pig.09373	17.0979	4.09575	0.0288688	0.121496	yes	up	0	0	0	0.0442659	0.0737444	0	0	0.0393368	FAM49A-201	protein FAM49A [Homo sapiens]	TKS34647.1
Chr03_121945221_121948271		0.019963	-5.64653	0.0118704	0.0641295	yes	down	0.0188742	0.0460083	0.0619467	0	0	0	0.0422764	0	#N/A	#N/A	#N/A
Chr03_126206126_126206928	Pig.21565	6.11678	2.61277	0.00175497	0.0150298	yes	up	0.0125828	0	0.0247787	0.0973849	0.21304	0.141405	0.0124538	0.15061	ZNF713-201	zinc finger protein 713 [Sus scrofa]	XP_003124511.4
Chr03_15313209_15331615		0.326743	-1.61377	0.0258422	0.112835	yes	down	0.0440398	0.0460083	0.0619467	0	0.0409691	0.053027	0.0506649	0.0313321	#N/A	#N/A	#N/A
Chr03_19856624_19923048	Pig.20029	0.0334955	-4.89989	0.0290768	0.122035	yes	down	0.031457	0.0460083	0	0	0	0	0.0258218	0	DTNB	dystrobrevin beta isoform X1 [Sus scrofa]	XP_020943401.1
Chr03_19895413_19949910	Pig.20029	0.0330412	-4.91959	0.0182625	1	yes	down	0.0566225	0.0230042	0	0	0	0	0.0265422	0	DTNB	dystrobrevin beta isoform X1 [Sus scrofa]	XP_020943401.1
Chr03_19922963_19949910	Pig.20029	0.036147	-4.78998	0.023588	1	yes	down	0.0377484	0.0153361	0.018584	0	0	0	0.0238895	0	DTNB	dystrobrevin beta isoform X1 [Sus scrofa]	XP_020943401.1
Chr03_19945644_19949910	Pig.20029	0.237717	-2.07268	0.00670623	0.0414481	yes	down	0.0943709	0.0766805	0.055752	0.0708254	0	0.0265135	0.0756011	0.0324463	DTNB	dystrobrevin beta isoform X1 [Sus scrofa]	XP_020943401.1
Chr03_20060176_20080765	Pig.20028	0.0511947	-4.28786	0.010736	0.0591547	yes	down	0	0.0383403	0.0123893	0	0	0	0.0169099	0	ASXL2-201	putative Polycomb group protein ASXL2 isoform X1 [Sus scrofa]	XP_020943398.1
Chr03_20064214_20080765	Pig.20028	0.0419111	-4.57653	0.0244947	1	yes	down	0	0.0613444	0	0	0	0	0.0204481	0	ASXL2-201	putative Polycomb group protein ASXL2 isoform X1 [Sus scrofa]	XP_020943398.1
Chr03_22947550_22956194	Pig.15593	34.6516	5.11485	0.0058916	0.0376346	yes	up	0	0	0	0.0796785	0.114714	0.0441892	0	0.0795271	WDR43-201	WD repeat-containing protein 43 [Sus scrofa]	XP_020943331.1
Chr03_30444359_30445305	MSTRG.8087	2.55362	1.35254	0.0108934	0.0596982	yes	up	0.031457	0.0996847	0.055752	0.19477	0.327753	0.362351	0.0622979	0.294958	0	0	XP_003125283.3
Chr03_31031804_31049311	Pig.06727	0.142304	-2.81295	0.00175197	0.0150298	yes	down	0.0503312	0.0766805	0.0433627	0.0442659	0	0	0.0567914	0.0147553	RMDN2-201	regulator of microtubule dynamics protein 2 isoform X1 [Sus scrofa]	XP_013851658.1
Chr03_32243111_32244778	Pig.06743	19.3247	4.27237	0.0280668	1	yes	up	0	0	0	0.0265595	0.0737444	0.0353514	0	0.0452184	MAP4K3-201	mitogen-activated protein kinase kinase kinase kinase 3 isoform X1 [Sus scrofa]	XP_020943994.1
Chr03_36242370_36243278	Pig.08272,MSTRG.8174	0.0501645	-4.31719	0.00664812	0.0413405	yes	down	0.0188742	0	0.0309733	0	0	0	0.0166158	0	#N/A	#N/A	#N/A
Chr03_38623681_38666459	Pig.08262	0.0264952	-5.23812	0.0114992	1	yes	down	0.031457	0.0153361	0.0495574	0	0	0	0.0321168	0	NRXN1-201	neurexin-1 isoform X8 [Sus scrofa]	XP_020943899.1
Chr03_45601718_45637098	MSTRG.8253,Pig.04789,MSTRG.8254	0.255972	-1.96594	3.47249e-11	3.20627e-09	yes	down	0.780133	0.690125	0.799112	0.380686	0.286784	0.406541	0.756457	0.358004	#N/A	#N/A	#N/A
Chr03_48418148_48428141	Pig.04800	14.9061	3.89783	0.0191213	0.093071	yes	up	0	0	0	0.0265595	0.0409691	0.0353514	0	0.0342933	USP34-201	ubiquitin carboxyl-terminal hydrolase 34 isoform X1 [Sus scrofa]	XP_020943148.1
Chr03_49988991_50015826	Pig.04812	55.3127	5.78954	0.000115105	0.00175362	yes	up	0	0	0	0.053119	0.139295	0.194432	0	0.128949	EHBP1-204	EH domain-binding protein 1 isoform X1 [Sus scrofa]	XP_020943128.1
Chr03_50015679_50034685	Pig.04812	5.06508	2.34058	0.000620409	0.00676718	yes	up	0.0566225	0.0230042	0.055752	0.416099	0.327753	0.53027	0.0451262	0.424708	EHBP1-204	EH domain-binding protein 1 isoform X1 [Sus scrofa]	XP_020943128.1
Chr03_50973589_50974664	MSTRG.8330,Pig.04818	0.254511	-1.9742	7.40921e-05	0.00126122	yes	down	0.18245	0.115021	0.117699	0.053119	0.0901321	0.053027	0.13839	0.0654261	#N/A	#N/A	#N/A
Chr03_57686609_57732712	Pig.04872	15.6042	3.96387	0.0231657	0.105476	yes	up	0	0	0	0.053119	0.0245815	0.0265135	0	0.034738	ZNF638-202	zinc finger protein 638 isoform X4 [Sus scrofa]	XP_005662532.1
Chr03_71892828_71898777	Pig.13433	2.33984	1.22641	0.0273062	0.117351	yes	up	0.0566225	0.0613444	0.0433627	0.230182	0.114714	0.344676	0.0537765	0.229857	UXS1-201	UDP-glucuronic acid decarboxylase 1 isoform b [Sus scrofa]	NP_001231703.1
Chr03_76209366_76216392	Pig.09468,MSTRG.8682	0.159616	-2.64732	0.00486768	0.0327691	yes	down	0.0566225	0.0306722	0.055752	0.0177063	0.0245815	0	0.0476823	0.0140959	#N/A	#N/A	#N/A
Chr03_79003261_79025856	Pig.09438	0.0274606	-5.18649	0.00394505	0.0278254	yes	down	0.0251656	0.0306722	0.037168	0	0	0	0.0310019	0	VWA3B-202	von Willebrand factor A domain-containing protein 3B isoform X1 [Sus scrofa]	XP_020942889.1
Chr03_81045165_81046139	Pig.09407	0.0372998	-4.74469	0.00277295	0.0210702	yes	down	0.0188742	0.0383403	0.0123893	0	0	0	0.0232013	0	THNSL2-201	LOW QUALITY PROTEIN: threonine synthase-like 2 [Sus scrofa]	XP_020942936.1
Chr03_84636714_84655608	Pig.13165	25.6677	4.68188	0.0104363	0.0579539	yes	up	0	0	0	0.0265595	0.0737444	0.0795406	0	0.0599482	ZC3H6-201	zinc finger CCCH domain-containing protein 6 [Sus scrofa]	XP_020942684.1
Chr03_88941522_88945706	Pig.09080	11.974	3.58184	0.0253579	0.111585	yes	up	0	0	0	0.0442659	0	0.0353514	0	0.0265391	TRRAP-201	transformation/transcription domain-associated protein isoform X5 [Sus scrofa]	XP_020941761.1
Chr03_89657255_89671619	MSTRG.9044,Pig.09102	0.0164807	-5.92308	1.98933e-05	0.000436079	yes	down	0.0692053	0.0766805	0.0123893	0	0	0	0.0527584	0	#N/A	#N/A	#N/A
Chr03_89663115_89671619	MSTRG.9044,Pig.09102	0.0258395	-5.27428	0.000232136	0.00314364	yes	down	0.0377484	0.0306722	0.0309733	0	0	0	0.0331313	0	#N/A	#N/A	#N/A
Chr03_89667585_89671619	MSTRG.9044,Pig.09102	0.00684945	-7.1898	2.58233e-08	1.74853e-06	yes	down	0.163576	0.0613444	0.148672	0	0	0	0.124531	0	#N/A	#N/A	#N/A
Chr03_89677790_89686941	MSTRG.9044,Pig.09102	0.0291292	-5.10139	0.0016288	0.0143438	yes	down	0.0251656	0.0383403	0.0247787	0	0	0	0.0294282	0	#N/A	#N/A	#N/A
Chr03_89683944_89733650	MSTRG.9044	3.57937e-07	-21.4138	9.4144e-05	0.00153399	yes	down	2.9255	0	0	0	0	0	0.975166	0	0	0	AKO62660.1
Chr03_89817260_89879377	Pig.09104	4.00857e-07	-21.2504	0.00110273	0.0105661	yes	down	0.0188742	1.61029	1.23274	0	0	0	0.953968	0	CYP3A29-207	cytochrome P450 CYP3A [Sus scrofa]	ACG76385.1
Chr03_89873248_89879377	Pig.09104	0.0171053	-5.86942	8.58507e-06	0.000227467	yes	down	0.0503312	0.0230042	0.074336	0	0	0	0.0492238	0	CYP3A29-207	cytochrome P450 CYP3A [Sus scrofa]	ACG76385.1
Chr03_91344235_91344900	MSTRG.9117,Pig.09148	53.2502	5.73471	0.0297528	0.123848	yes	up	0	0	0	0.123944	0.114714	0.12373	0	0.120796	#N/A	#N/A	#N/A
Chr03_93652036_93670231	Pig.09212	12.3732	3.62914	0.0203028	0.0972491	yes	up	0	0	0	0.0354127	0.049163	0	0	0.0281919	BAZ1B-201	tyrosine-protein kinase BAZ1B [Sus scrofa]	XP_005662033.2
Chr03_96789698_96804486	Pig.10269,MSTRG.9426	0.109619	-3.18943	0.00960032	0.0543721	yes	down	0.0503312	0.0153361	0.018584	0	0	0.0176757	0.0280838	0.00589189	#N/A	#N/A	#N/A
Chr03_98846333_98847046	Pig.10357	0.335686	-1.57481	0.0224781	0.103781	yes	down	0.0629139	0.0843486	0.0619467	0.0619722	0.049163	0.0176757	0.0697364	0.0429369	CREBBP-201	CREB-binding protein [Sus scrofa]	XP_005662241.2
Chr04_106163701_106169027	Pig.01689	3.6629	1.87299	0.042988	0.163119	yes	up	0.031457	0.0383403	0	0.115091	0.221233	0.132568	0.0232657	0.156297	PALMD-201	palmdelphin [Sus scrofa]	NP_001033734.1
Chr04_110101379_110134080	Pig.01698	0.00475535	-7.71623	8.35088e-10	6.6597e-08	yes	down	0.201325	0.145693	0.192035	0	0	0	0.179684	0	TLCD4-RWDD3	transmembrane protein 56 isoform X2 [Sus scrofa]	XP_020945824.1
Chr04_110124557_110134080	Pig.01698	0.0105752	-6.56317	1.26773e-06	4.49161e-05	yes	down	0.0943709	0.0613444	0.0867254	0	0	0	0.0808136	0	TLCD4-RWDD3	transmembrane protein 56 isoform X2 [Sus scrofa]	XP_020945824.1
Chr04_110234028_110234332	Pig.01699	0.00658879	-7.24577	1.92176e-06	6.36479e-05	yes	down	0.0754967	0.130357	0.179645	0	0	0	0.1285	0	ALG14-202	UDP-N-acetylglucosamine transferase subunit ALG14 homolog isoform X3 [Sus scrofa]	XP_001924741.1
Chr04_113748733_113752559	Pig.01735	5.35173	2.42001	0.00153412	0.013668	yes	up	0.031457	0	0.0247787	0.256742	0.122907	0.185595	0.0187452	0.188415	ZNF644-207	zinc finger protein 644 isoform X1 [Sus scrofa]	XP_020945920.1
Chr04_117045483_117065883	MSTRG.12519,Pig.01753	0.0423286	-4.56222	0.00573634	0.037031	yes	down	0.0125828	0.0230042	0.0247787	0	0	0	0.0201219	0	#N/A	#N/A	#N/A
Chr04_117055265_117065883	MSTRG.12519,Pig.01753	0.0293216	-5.09189	0.00107726	0.0104535	yes	down	0.0125828	0.0306722	0.0433627	0	0	0	0.0288726	0	#N/A	#N/A	#N/A
Chr04_118647528_118648214	Pig.01766	0.008397	-6.89591	1.18875e-06	4.2668e-05	yes	down	0.106954	0.0996847	0.0991147	0	0	0	0.101918	0	SYDE2-201	LOW QUALITY PROTEIN: rho GTPase-activating protein SYDE2 [Sus scrofa]	XP_001928259.4
Chr04_22743270_22752539	Pig.03771	3.03453	1.60147	0.0261909	0.114005	yes	up	0.031457	0	0.0123893	0.0708254	0.0819383	0.106054	0.0146154	0.0862726	EMC2-201	ER membrane protein complex subunit 2 isoform X4 [Sus scrofa]	XP_020944677.1
Chr04_22763380_22773855	Pig.03771	0.403418	-1.30965	0.0121465	0.0653894	yes	down	0.100662	0.176365	0.0867254	0.177063	0.0245815	0.0618649	0.121251	0.0878366	EMC2-201	ER membrane protein complex subunit 2 isoform X4 [Sus scrofa]	XP_020944677.1
Chr04_28268052_28272728	MSTRG.10816,Pig.08101	0.00225018	-8.79574	7.22305e-12	8.74631e-10	yes	down	0.415232	0.291386	0.433627	0	0	0	0.380082	0	#N/A	#N/A	#N/A
Chr04_29129287_29153365	Pig.08103	3.69727	1.88646	0.000583125	0.0064846	yes	up	0.0566225	0.0230042	0.037168	0.230182	0.254009	0.327	0.0389316	0.270397	ZFPM2-204	zinc finger protein ZFPM2 [Sus scrofa]	NP_001182303.1
Chr04_30299278_30309026	Pig.08107	168.104	7.39321	7.92933e-08	4.43994e-06	yes	up	0	0	0	0.274448	0.467048	0.424216	0	0.388571	OXR1-205	oxidation resistance protein 1 isoform X4 [Sus scrofa]	XP_013852007.1
Chr04_30299278_30328758	Pig.08107	56.0161	5.80777	0.000580337	0.00647724	yes	up	0	0	0	0.0619722	0.17207	0.159081	0	0.131041	OXR1-205	oxidation resistance protein 1 isoform X4 [Sus scrofa]	XP_013852007.1
Chr04_30299278_30333225	Pig.08107	4.66549	2.22203	0.0243595	0.10897	yes	up	0.0440398	0.0306722	0.0123893	0.247889	0.360528	0.141405	0.0290338	0.249941	OXR1-205	oxidation resistance protein 1 isoform X4 [Sus scrofa]	XP_013852007.1
Chr04_30299278_30338140	Pig.08107	48.0373	5.58608	0.00534944	0.0351288	yes	up	0	0	0	0.0354127	0.163877	0.141405	0	0.113565	OXR1-205	oxidation resistance protein 1 isoform X4 [Sus scrofa]	XP_013852007.1
Chr04_30299278_30342356	Pig.08107	24.2828	4.60187	2.66076e-06	8.50727e-05	yes	up	0	0	0.0309733	0.478071	0.376916	0.609811	0.0103244	0.488266	OXR1-205	oxidation resistance protein 1 isoform X4 [Sus scrofa]	XP_013852007.1
Chr04_33053565_33057725	Pig.01505	0.034212	-4.86935	0.0414615	1	yes	down	0.0125828	0.0306722	0.0309733	0	0	0	0.0247428	0	DECR1-201	2,4-dienoyl-CoA reductase, mitochondrial [Sus scrofa]	NP_001177161.2
Chr04_36796856_36807236	Pig.01495	0.0293634	-5.08984	0.00113466	0.0107552	yes	down	0.0629139	0	0.0247787	0	0	0	0.0292309	0	WWP1-201	NEDD4-like E3 ubiquitin-protein ligase WWP1 isoform X1 [Sus scrofa]	XP_005663042.1
Chr04_36805153_36807236	Pig.01495	0.03721	-4.74816	0.003721	0.0266773	yes	down	0.0440398	0	0.0247787	0	0	0	0.0229395	0	WWP1-201	NEDD4-like E3 ubiquitin-protein ligase WWP1 isoform X1 [Sus scrofa]	XP_005663042.1
Chr04_36807602_36836417	Pig.01495	0.0446561	-4.485	0.00949037	0.0539352	yes	down	0.0125828	0	0.0433627	0	0	0	0.0186485	0	WWP1-201	NEDD4-like E3 ubiquitin-protein ligase WWP1 isoform X1 [Sus scrofa]	XP_005663042.1
Chr04_36821977_36836417	Pig.01495	0.15807	-2.66136	0.000114713	0.00175362	yes	down	0.100662	0.153361	0.123893	0.0354127	0.049163	0.0265135	0.125972	0.0370297	WWP1-201	NEDD4-like E3 ubiquitin-protein ligase WWP1 isoform X1 [Sus scrofa]	XP_005663042.1
Chr04_36836233_36875034		0.0206639	-5.59674	0.00798539	0.0474298	yes	down	0.0629139	0	0.0619467	0	0	0	0.0416202	0	#N/A	#N/A	#N/A
Chr04_36839930_36851349	Pig.01495	0.0445417	-4.4887	0.0398079	1	yes	down	0	0.0383403	0.018584	0	0	0	0.0189748	0	WWP1-201	NEDD4-like E3 ubiquitin-protein ligase WWP1 isoform X1 [Sus scrofa]	XP_005663042.1
Chr04_36861805_36875034		0.0472326	-4.40407	0.000263453	0.00345622	yes	down	0.132119	0.0383403	0.111504	0	0.0245815	0	0.0939879	0.00819383	#N/A	#N/A	#N/A
Chr04_4037434_4061942	Pig.13340	42.4493	5.40767	0.00124383	0.0115547	yes	up	0	0	0	0.0265595	0.122907	0.150243	0	0.0999034	ASAP1-201	arf-GAP with SH3 domain, ANK repeat and PH domain-containing protein 1 isoform X1 [Sus scrofa]	XP_020944565.1
Chr04_42637595_42638483	Pig.01470	4.13367	2.04742	0.026422	0.114358	yes	up	0.0188742	0	0.0123893	0.0619722	0.0737444	0.114892	0.0104212	0.0835362	ZBTB10-201	zinc finger and BTB domain-containing protein 10 isoform X1 [Sus scrofa]	XP_001928312.1
Chr04_57443192_57444790	Pig.19195,MSTRG.11078	0.268591	-1.89652	0.0154816	0.0796833	yes	down	0.213907	0.0306722	0.18584	0.053119	0.0737444	0.0883784	0.143473	0.0717473	#N/A	#N/A	#N/A
Chr04_58498565_58501388	Pig.14062,MSTRG.11105	7.70432	2.94567	1.71488e-12	2.4077e-10	yes	up	0.100662	0.0536764	0.0495574	0.805639	1.11436	1.01635	0.0679653	0.978784	#N/A	#N/A	#N/A
Chr04_58527407_58562535	Pig.14062,MSTRG.11105	22.2365	4.47486	0.000767038	0.00811515	yes	up	0	0.0153361	0	0.274448	0.180264	0.106054	0.00511203	0.186922	#N/A	#N/A	#N/A
Chr04_58547233_58562535	Pig.14062,MSTRG.11105	25.2083	4.65583	0.000718165	0.00767807	yes	up	0.0125828	0	0	0.123944	0.38511	0.114892	0.00419426	0.207982	#N/A	#N/A	#N/A
Chr04_59139762_59141172	Pig.14064	4.94244	2.30522	0.00219557	0.0175581	yes	up	0.0188742	0	0.037168	0.150504	0.147489	0.238622	0.0186807	0.178871	CHD7-201	chromodomain-helicase-DNA-binding protein 7 isoform X1 [Sus scrofa]	XP_020944993.1
Chr04_60923348_60923925	Pig.14072	0.0250916	-5.31665	0.000151893	0.00224668	yes	down	0.0377484	0	0.0619467	0	0	0	0.0332317	0	CYP7A1-201	cholesterol 7-alpha-monooxygenase isoform X1 [Sus scrofa]	XP_020944405.1
Chr04_60968359_60988247	Pig.14073	0.31268	-1.67724	0.0134495	0.0712707	yes	down	0.0566225	0.0690125	0.0433627	0.053119	0	0.0441892	0.0563326	0.0324361	UBXN2B-201	UBX domain-containing protein 2B [Sus scrofa]	XP_001925017.1
Chr04_64703098_64703528		16.203	4.01819	0.00306301	0.022875	yes	up	0	0	0	0.0354127	0.049163	0.0265135	0	0.0370297	#N/A	#N/A	#N/A
Chr04_66658600_66674205	MSTRG.11201,Pig.04915	0.0377181	-4.7286	0.00701913	0.0427746	yes	down	0.0566225	0	0.0123893	0	0	0	0.023004	0	#N/A	#N/A	#N/A
Chr04_67550881_67619743	Pig.04920	4.09821	2.03499	0.00502511	0.0334312	yes	up	0.0251656	0.0230042	0.0433627	0.203623	0.245815	0.256297	0.0305108	0.235245	KIFAP3-201	kinesin-associated protein 3 isoform X2 [Sus scrofa]	XP_001927795.3
Chr04_68040587_68052911	Pig.04929	0.0190057	-5.71743	0.00668979	0.0414481	yes	down	0.0566225	0.0230042	0.055752	0	0	0	0.0451262	0	F5-201	coagulation factor V precursor [Sus scrofa]	NP_999285.1
Chr04_69553190_69560508	Pig.04945	0.0823326	-3.60239	0.0483929	0.177273	yes	down	0.031457	0	0	0	0	0	0.0104857	0	DCAF6-204	DDB1- and CUL4-associated factor 6 isoform X5 [Sus scrofa]	XP_020945113.1
Chr04_75382209_75383738	Pig.04982	0.0576888	-4.11557	0.033606	1	yes	down	0.0125828	0	0.0309733	0	0	0	0.0145187	0	ATF6-204	cyclic AMP-dependent transcription factor ATF-6 alpha isoform X3 [Sus scrofa]	XP_020945172.1
Chr04_75909038_75909407		2.97388	1.57235	1.60809e-05	0.0003712	yes	up	0.113245	0.0843486	0.0991147	0.451512	0.598149	0.600973	0.0989028	0.550211	#N/A	#N/A	#N/A
Chr04_77070685_77073952	Pig.10646,MSTRG.11434,MSTRG.11433	0.115749	-3.11093	0.00170696	0.0149029	yes	down	0.106954	0.0843486	0.037168	0	0.049163	0	0.0761568	0.0163877	#N/A	#N/A	#N/A
Chr04_80611471_80622183	Pig.10548	0.376254	-1.41022	0.00786768	0.0470055	yes	down	0.169868	0.0460083	0.0805307	0.0885317	0.0737444	0.0441892	0.0988022	0.0688218	CCT3-202	T-complex protein 1 subunit gamma [Sus scrofa]	NP_001231109.1
Chr04_81182357_81195763		0.270265	-1.88755	0.00190644	0.0160025	yes	down	0.138411	0.0920166	0.0991147	0.0796785	0.0573568	0.0265135	0.109847	0.0545163	#N/A	#N/A	#N/A
Chr04_81477534_81477997	Pig.10515,MSTRG.11588	4.56042	2.18917	0.0430557	0.163173	yes	up	0	0.0306722	0	0.0708254	0.0901321	0.0795406	0.0102241	0.080166	#N/A	#N/A	#N/A
Chr04_90774620_90785694	Pig.13024	0.103468	-3.27274	0.0027483	0.0209352	yes	down	0.0754967	0.0153361	0.0433627	0	0	0.0265135	0.0447318	0.00883784	MAN1A2-201	mannosyl-oligosaccharide 1,2-alpha-mannosidase IB [Sus scrofa]	XP_001927657.4
Chr04_93596428_93597409	Pig.15772	0.150488	-2.73228	0.0324523	0.132728	yes	down	0.0125828	0.0230042	0.0247787	0	0.0163877	0	0.0201219	0.00546255	TRIM33-201	E3 ubiquitin-protein ligase TRIM33 isoform X1 [Sus scrofa]	XP_020945665.1
Chr04_98096686_98108020		51035.2	15.6392	0.0299962	0.124691	yes	up	0	0	0	0.0265595	0	0	0	0.00885317	#N/A	#N/A	#N/A
Chr05_100664210_100668705	Pig.11743	0.342318	-1.54659	0.0018193	0.0154843	yes	down	0.232782	0.153361	0.123893	0.053119	0.122907	0.150243	0.170012	0.108757	PAWR-201	PREDICTED: PRKC apoptosis WT1 regulator protein [Felis catus]	XP_020948471.1
Chr05_102030367_102031420	Pig.11741	0.0585683	-4.09374	0.00131553	0.0120735	yes	down	0.0629139	0.0306722	0.0681414	0.0177063	0	0	0.0539092	0.00590211	NAV3	neuron navigator 3 isoform X1 [Sus scrofa]	XP_020948732.1
Chr05_103221996_103282566	Pig.11737	4.90848	2.29528	0.0174552	0.086926	yes	up	0.0125828	0	0.018584	0.115091	0.0901321	0.0883784	0.0103889	0.0978672	ZDHHC17-202	palmitoyltransferase ZDHHC17 [Aotus nancymaae]	XP_020948474.1
Chr05_104214626_104274170	MSTRG.14747	0.0698153	-3.84031	0.00122336	0.0113993	yes	down	0.0817881	0.0920166	0.09292	0	0	0.0353514	0.0889083	0.0117838	0	0	XP_020947997.1
Chr05_104253525_104255276	MSTRG.14747	0.345056	-1.5351	0.0470283	0.173894	yes	down	0.0692053	0.0230042	0.055752	0.0354127	0.0245815	0.0353514	0.0493205	0.0317818	0	0	XP_020947997.1
Chr05_104253525_104274170	MSTRG.14747	0.118812	-3.07325	0.000245516	0.00328108	yes	down	0.239073	0.153361	0.111504	0.0265595	0.049163	0.0353514	0.167979	0.0370246	0	0	XP_020947997.1
Chr05_104558652_104586660	Pig.13247	6.71066	2.74646	0.0419765	0.160044	yes	up	0.0125828	0	0	0.053119	0.0737444	0.0353514	0.00419426	0.0540716	LRP6-201	LOW QUALITY PROTEIN: low-density lipoprotein receptor-related protein 6 [Sus scrofa]	XP_020948003.1
Chr05_106667069_106690377	Pig.13290,MSTRG.14805	0.00940561	-6.73226	8.83093e-05	0.00145207	yes	down	0.0880795	0.0536764	0.130088	0	0	0	0.0906146	0	#N/A	#N/A	#N/A
Chr05_106668101_106696417	Pig.13290,MSTRG.14805	0.0259609	-5.26752	0.0237314	0.106967	yes	down	0.0188742	0.0230042	0.055752	0	0	0	0.0325435	0	#N/A	#N/A	#N/A
Chr05_106686520_106690377	Pig.13290,MSTRG.14805	0.0449492	-4.47556	0.0296408	1	yes	down	0.0125828	0	0.0433627	0	0	0	0.0186485	0	#N/A	#N/A	#N/A
Chr05_106696908_106702791	Pig.13290,MSTRG.14805	0.00869234	-6.84604	4.82379e-05	0.000890793	yes	down	0.138411	0.122689	0.037168	0	0	0	0.0994225	0	#N/A	#N/A	#N/A
Chr05_106754199_106756664	Pig.13291,MSTRG.14807	0.0185535	-5.75216	4.30425e-05	0.000804604	yes	down	0.031457	0.0306722	0.074336	0	0	0	0.0454884	0	#N/A	#N/A	#N/A
Chr05_11188042_11212141	Pig.07621	0.072112	-3.79362	0.0247817	0.109925	yes	down	0.0251656	0.0536764	0.0495574	0	0	0.0176757	0.0427998	0.00589189	LARP4-202	la-related protein 4 isoform X1 [Sus scrofa]	XP_020947303.1
Chr05_20526478_20543229	Pig.19106	2.63319	1.39681	0.00140948	0.0127818	yes	up	0.0817881	0.130357	0.142477	0.646281	0.499823	0.57446	0.118207	0.573522	TBC1D22A-201	LOW QUALITY PROTEIN: TBC1 domain family member 22A [Sus scrofa]	XP_020947020.1
Chr05_20526478_20580658	Pig.19106	4.6398	2.21406	0.000625093	0.00677814	yes	up	0.031457	0.0460083	0.0123893	0.212476	0.327753	0.220946	0.0299515	0.253725	TBC1D22A-201	LOW QUALITY PROTEIN: TBC1 domain family member 22A [Sus scrofa]	XP_020947020.1
Chr05_20526478_20598492	Pig.19106	66.7658	6.06104	5.97847e-06	0.000170247	yes	up	0	0	0	0.159357	0.163877	0.132568	0	0.151934	TBC1D22A-201	LOW QUALITY PROTEIN: TBC1 domain family member 22A [Sus scrofa]	XP_020947020.1
Chr05_20526478_20617636	Pig.19106	12.4837	3.64197	0.00819553	0.0483949	yes	up	0	0	0.0123893	0.0708254	0.122907	0.114892	0.00412978	0.102875	TBC1D22A-201	LOW QUALITY PROTEIN: TBC1 domain family member 22A [Sus scrofa]	XP_020947020.1
Chr05_21491058_21494054	Pig.14005	0.0249534	-5.32462	0.0139653	1	yes	down	0.0377484	0.0153361	0.0495574	0	0	0	0.0342139	0	PPARA-201	peroxisome proliferator-activated receptor alpha [Sus scrofa]	NP_001037991.1
Chr05_21492507_21494054	Pig.14005	0.0948429	-3.39832	0.0220885	0.102699	yes	down	0.339735	0.23771	0.0619467	0.0177063	0.0983259	0	0.213131	0.0386774	PPARA-201	peroxisome proliferator-activated receptor alpha [Sus scrofa]	NP_001037991.1
Chr05_25669915_25670355	Pig.18998,MSTRG.13394	5.3384	2.41641	0.0340941	0.137232	yes	up	0.0251656	0	0	0.0973849	0.0737444	0.0795406	0.00838853	0.0835566	#N/A	#N/A	#N/A
Chr05_25685145_25698587	MSTRG.13394,Pig.18996	0.174787	-2.51633	0.00442795	0.0305137	yes	down	0.0692053	0.0613444	0.0619467	0.0354127	0	0.0265135	0.0641655	0.0206421	#N/A	#N/A	#N/A
Chr05_25794915_25795215	Pig.18991	14.9328	3.90041	0.0297022	0.123848	yes	up	0	0	0	0	0.0163877	0.0883784	0	0.034922	ITGA7-201	LOW QUALITY PROTEIN: integrin alpha-7 [Sus scrofa]	XP_020946892.1
Chr05_28548500_28549466	Pig.17267	7.10395	2.82862	2.32679e-05	0.000499277	yes	up	0.0943709	0.0230042	0.0123893	0.548897	0.843964	0.318162	0.0432548	0.570341	PTGES3-201	PREDICTED: prostaglandin E synthase 3 isoform X1 [Mustela putorius furo]	TEA31711.1
Chr05_28637762_28651868	Pig.17270	0.160111	-2.64286	0.00340347	0.0250492	yes	down	0.0440398	0.0920166	0.0991147	0.0177063	0	0.053027	0.0783904	0.0235778	RBMS2-201	RNA-binding motif, single-stranded-interacting protein 2 [Sus scrofa]	XP_020948550.1
Chr05_28687240_28690035		0.0104227	-6.58412	5.93727e-06	0.000170247	yes	down	0.0943709	0.0460083	0.105309	0	0	0	0.0818962	0	#N/A	#N/A	#N/A
Chr05_32183948_32242667		11.8868	3.57129	0.0267597	0.115328	yes	up	0	0	0	0.0177063	0.0655506	0	0	0.0277523	#N/A	#N/A	#N/A
Chr05_35383986_35390007		16.3166	4.02827	0.0170779	0.0857272	yes	up	0	0	0	0.0265595	0.0327753	0.053027	0	0.037454	#N/A	#N/A	#N/A
Chr05_36457974_36459199	Pig.05498	0.219057	-2.19062	0.0184556	0.0907892	yes	down	0.0629139	0.0383403	0.0433627	0.0177063	0.0409691	0	0.0482056	0.0195585	RAB3IP	rab-3A-interacting protein isoform X1 [Sus scrofa]	XP_020947636.1
Chr05_38293867_38305284	Pig.05509	15.7134	3.97392	0.0476138	1	yes	up	0	0	0	0	0.0409691	0.0707027	0	0.037224	TBC1D15-203	TBC1 domain family member 15 isoform X1 [Sus scrofa]	XP_003355565.1
Chr05_42398007_42403290	MSTRG.13728,Pig.20735	2.2757	1.18631	0.0498496	0.180609	yes	up	0.0440398	0.0230042	0.0309733	0.132798	0.10652	0.176757	0.0326724	0.138691	#N/A	#N/A	#N/A
Chr05_4280106_4284852	MSTRG.12783	0.0179021	-5.80372	0.00233623	0.0184417	yes	down	0.0125828	0.0920166	0.037168	0	0	0	0.0472558	0	0	0	XP_024599212.1
Chr05_43684815_43744217	Pig.06613	0.0339823	-4.87907	3.35013e-05	0.000671525	yes	down	0.0629139	0.0920166	0.111504	0	0.0163877	0	0.0888115	0.00546255	FGD4	FYVE, RhoGEF and PH domain-containing protein 4 isoform X1 [Sus scrofa]	XP_020947725.1
Chr05_48391369_48407553	Pig.06589	124.706	6.96239	5.00096e-07	2.14619e-05	yes	up	0	0	0	0.247889	0.204846	0.397703	0	0.283479	ARNTL2-201	aryl hydrocarbon receptor nuclear translocator-like protein 2 isoform X1 [Sus scrofa]	XP_020947810.1
Chr05_48391369_48424370	Pig.06589	78.4136	6.29303	0.000385686	0.0046521	yes	up	0	0	0	0.230182	0.0983259	0.194432	0	0.174314	ARNTL2-201	aryl hydrocarbon receptor nuclear translocator-like protein 2 isoform X1 [Sus scrofa]	XP_020947810.1
Chr05_51807575_51853508	Pig.06573	0.064163	-3.96211	0.00443635	0.0305137	yes	down	0.0440398	0.0306722	0.074336	0.0177063	0	0	0.0496827	0.00590211	SOX5-201	transcription factor SOX-5 isoform X2 [Sus scrofa]	XP_020948580.1
Chr05_51853298_51855700	Pig.06573	0.0388762	-4.68497	0.00862668	1	yes	down	0.0125828	0.0153361	0.037168	0	0	0	0.0216956	0	SOX5-201	transcription factor SOX-5 isoform X2 [Sus scrofa]	XP_020948580.1
Chr05_51935997_51953715	Pig.06573	0.0720715	-3.79443	1.49493e-05	0.000355863	yes	down	0.0566225	0.337394	0.359291	0	0.10652	0	0.251103	0.0355066	SOX5-201	transcription factor SOX-5 isoform X2 [Sus scrofa]	XP_020948580.1
Chr05_54141653_54170120	MSTRG.13889,Pig.09598	0.00961898	-6.6999	8.94938e-07	3.45174e-05	yes	down	0.100662	0.0536764	0.111504	0	0	0	0.0886142	0	#N/A	#N/A	#N/A
Chr05_54443877_54452846	Pig.09596	19.6528	4.29666	0.028644	1	yes	up	0	0	0	0.0177063	0.049163	0.0707027	0	0.0458573	PDE3A-201	PREDICTED: cGMP-inhibited 3',5'-cyclic phosphodiesterase A [Physeter catodon]	NP_998901.1
Chr05_59761807_59766053	Pig.09572	6.54223	2.70978	0.0409389	0.1577	yes	up	0	0	0.0123893	0.0354127	0.0737444	0.053027	0.00412978	0.0540614	WBP11	PREDICTED: WW domain-binding protein 11 [Orcinus orca]	XP_003481731.2
Chr05_60087028_60091213	Pig.09568	2.9837	1.5771	0.0358708	0.142501	yes	up	0.031457	0.0153361	0.0619467	0.212476	0.147489	0.24746	0.0362466	0.202475	ATF7IP-202	activating transcription factor 7-interacting protein 1 isoform X1 [Sus scrofa]	XP_005664117.1
Chr05_65803355_65828340		0.015923	-5.97275	0.00368528	1	yes	down	0.0943709	0.0383403	0.0309733	0	0	0	0.0545615	0	#N/A	#N/A	#N/A
Chr05_66006614_66013845	Pig.07499	9.66572	3.27288	0.00717211	0.0435327	yes	up	0.0188742	0	0	0.0973849	0.0983259	0.150243	0.00629139	0.115318	KDM5A-201	lysine-specific demethylase 5A [Sus scrofa]	XP_020948145.1
Chr05_66635943_66647337	Pig.07503	0.180876	-2.46692	0.00607658	0.0385736	yes	down	0.0817881	0.0996847	0.0495574	0.0177063	0.0245815	0.0353514	0.07701	0.0258797	ERC1-203	ELKS/Rab6-interacting/CAST family member 1 isoform X3 [Sus scrofa]	XP_020948632.1
Chr05_66635943_66654569	Pig.07503	0.342576	-1.5455	0.0049353	0.0330951	yes	down	0.132119	0.245378	0.123893	0.0708254	0.0901321	0.159081	0.16713	0.10668	ERC1-203	ELKS/Rab6-interacting/CAST family member 1 isoform X3 [Sus scrofa]	XP_020948632.1
Chr05_68026189_68027246	Pig.07513	7.69744	2.94438	0.00379721	0.02711	yes	up	0.0188742	0	0	0.0354127	0.17207	0.0795406	0.00629139	0.0956745	CECR2-201	LOW QUALITY PROTEIN: cat eye syndrome critical region protein 2 [Sus scrofa]	XP_020948162.1
Chr05_71887356_71887681	Pig.07532	0.0484864	-4.36628	0.00438103	0.0303784	yes	down	0.0188742	0.0153361	0.018584	0	0	0	0.0175981	0	YAF2-201	YY1-associated factor 2 isoform X1 [Sus scrofa]	XP_020948199.1
Chr05_72050161_72071860	Pig.07534	3.08509	1.62531	0.00992855	0.0556108	yes	up	0.0188742	0.0153361	0.0495574	0.0796785	0.180264	0.238622	0.0279225	0.166188	PPHLN1-201	periphilin-1 isoform X1 [Sus scrofa]	XP_020948207.1
Chr05_75269998_75283400		10.1782	3.34742	0.0242795	0.108794	yes	up	0	0	0	0.0265595	0.0163877	0.0265135	0	0.0231536	#N/A	#N/A	#N/A
Chr05_75858259_75868552	MSTRG.14257	0.0449332	-4.47607	0.0274848	0.117621	yes	down	0.0125828	0	0.0433627	0	0	0	0.0186485	0	0	0	XP_020948239.1
Chr05_78171662_78194922	Pig.13110	0.0756017	-3.72544	0.00192724	0.0160359	yes	down	0.0440398	0.0920166	0.09292	0	0.0327753	0	0.0763255	0.0109251	SLC41A2-201	LOW QUALITY PROTEIN: solute carrier family 41 member 2 [Sus scrofa]	XP_005664240.2
Chr05_81215241_81234546	Pig.04043	4.66495	2.22186	0.0288107	0.121496	yes	up	0.0125828	0	0.0123893	0.0973849	0.0819383	0.0441892	0.00832404	0.0745041	GNPTAB-201	N-acetylglucosamine-1-phosphotransferase subunits alpha/beta isoform X6 [Sus scrofa]	XP_020948331.1
Chr05_82451497_82468552	Pig.04054	0.0351735	-4.82937	0.0344265	1	yes	down	0.0251656	0.0230042	0.0247787	0	0	0	0.0243161	0	NR1H4-201	bile acid receptor isoform X1 [Sus scrofa]	XP_020946591.1
Chr05_84175407_84176240	MSTRG.14449,Pig.04063	0.349416	-1.51698	0.00506068	0.0335215	yes	down	0.144702	0.130357	0.142477	0.053119	0.114714	0.106054	0.139179	0.0912956	#N/A	#N/A	#N/A
Chr05_86446353_86447618	MSTRG.14491	0.0544375	-4.19926	0.0160591	0.0813335	yes	down	0.0251656	0.0230042	0	0	0	0	0.0160566	0	0	0	XP_001925096.2
Chr05_86966822_86990803	MSTRG.14516,Pig.04081	5.66227	2.50138	0.0211631	0.0998374	yes	up	0.0188742	0	0.0123893	0.0442659	0.049163	0.24746	0.0104212	0.113629	#N/A	#N/A	#N/A
Chr05_99164719_99181403	MSTRG.14656,Pig.11752	0.0964297	-3.37438	1.80977e-07	9.19059e-06	yes	down	0.220199	0.130357	0.179645	0.0265595	0.0245815	0.0441892	0.176734	0.0317767	#N/A	#N/A	#N/A
Chr05_99164719_99208044	MSTRG.14656,Pig.11752	0.0646589	-3.95101	0.0200568	0.0966977	yes	down	0.0251656	0.0153361	0	0	0	0	0.0135006	0	#N/A	#N/A	#N/A
Chr06_101805189_101814144	Pig.08532	0.016449	-5.92586	0.0010474	0.0102381	yes	down	0.0692053	0	0.0867254	0	0	0	0.0519769	0	RERE	arginine-glutamic acid dipeptide (RE) repeats, isoform CRA_c [Homo sapiens]	ELR58553.1
Chr06_101805189_101839069	Pig.08532	0.0668541	-3.90284	0.00950549	0.0539352	yes	down	0.0125828	0.0690125	0.0495574	0	0.0163877	0	0.0437175	0.00546255	RERE	arginine-glutamic acid dipeptide (RE) repeats, isoform CRA_c [Homo sapiens]	ELR58553.1
Chr06_10288787_10295546	Pig.14717	0.177063	-2.49767	0.0328242	0.13371	yes	down	0.0629139	0.0460083	0.018584	0	0.0245815	0.0176757	0.0425021	0.0140857	ZYG11B-201	protein zyg-11 homolog B [Sus scrofa]	XP_020952290.1
Chr06_10402432_10406397	Pig.14715	0.0170783	-5.87169	0.000171119	0.00250672	yes	down	0.0377484	0.0690125	0.0433627	0	0	0	0.0500412	0	ECHDC2-201	enoyl-CoA hydratase domain-containing protein 2, mitochondrial isoform X5 [Sus scrofa]	XP_020952280.1
Chr06_10669614_10673196		0.0350092	-4.83612	0.0260927	1	yes	down	0.0188742	0.0230042	0.0309733	0	0	0	0.0242839	0	#N/A	#N/A	#N/A
Chr06_108820298_108820413	Pig.16623	0.00300001	-8.38082	4.44664e-10	3.66186e-08	yes	down	0.327153	0.207037	0.322123	0	0	0	0.285438	0	A1BG	alpha-1B-glycoprotein [Sus scrofa]	XP_003128180.1
Chr06_109112311_109116819		0.045662	-4.45286	0.0266547	0.115123	yes	down	0	0.0306722	0.0247787	0	0	0	0.0184836	0	#N/A	#N/A	#N/A
Chr06_11538093_11556397		38.2707	5.25817	0.000421712	0.00499983	yes	up	0	0	0	0.0973849	0.0737444	0.0883784	0	0.0865026	#N/A	#N/A	#N/A
Chr06_119254850_119273969	MSTRG.17506	22.6267	4.49995	0.0136857	0.0721461	yes	up	0	0	0	0.0619722	0.0655506	0.0265135	0	0.0513454	0	0	XP_020950281.1
Chr06_123941138_123942262	MSTRG.17840,Pig.16141	0.145846	-2.77748	0.0162946	0.0820655	yes	down	0.0377484	0.0230042	0.0309733	0	0.0245815	0	0.0305753	0.00819383	#N/A	#N/A	#N/A
Chr06_124342503_124342926	Pig.16121	0.231343	-2.1119	0.00172385	0.0149295	yes	down	0.100662	0.0843486	0.148672	0.0354127	0.0655506	0.0441892	0.111228	0.0483842	ECH1-202	delta(3,5)-Delta(2,4)-dienoyl-CoA isomerase, mitochondrial [Sus scrofa]	NP_001038072.1(delta(3,5)-Delta
Chr06_12458471_12462570	Pig.12444	0.108826	-3.1999	8.71871e-05	0.0014438	yes	down	0.0943709	0.0766805	0.123893	0.0177063	0.0245815	0.0176757	0.0983149	0.0199878	DHCR24-202	delta(24)-sterol reductase [Sus scrofa]	NP_001230283.1(delta
Chr06_125971884_125972374	Pig.16043	12.64	3.65992	0.0228098	0.104829	yes	up	0	0	0	0.0265595	0.0245815	0.0353514	0	0.0288308	ZNF568	PREDICTED: zinc finger protein 568-like isoform X1 [Balaenoptera acutorostrata scammoni]	XP_020952805.1
Chr06_127927287_127934404	Pig.15970	14.6174	3.86961	0.0229246	0.104898	yes	up	0	0	0	0.0265595	0.0573568	0.0176757	0	0.033864	UBA2	PREDICTED: SUMO-activating enzyme subunit 2 [Vicugna pacos]	XP_006217089.1
Chr06_128194551_128197407	Pig.15966	0.421576	-1.24613	0.000615471	0.00674583	yes	down	0.207616	0.199369	0.272565	0.16821	0.17207	0.194432	0.226517	0.178238	LSM14A-201	protein LSM14 homolog A [Sus scrofa]	NP_001302727.1
Chr06_137020965_137029577	Pig.15005	26.0159	4.70132	0.00198457	0.0162701	yes	up	0	0	0	0.0708254	0.0245815	0.0795406	0	0.0583158	HEATR3-201	HEAT repeat-containing protein 3 isoform X1 [Sus scrofa]	XP_020949878.1
Chr06_139797251_139814742	MSTRG.18233	0.0241789	-5.37011	0.0133687	1	yes	down	0.0440398	0	0.0619467	0	0	0	0.0353288	0	0	0	XP_020949833.1
Chr06_14381044_14387920	Pig.12451	0.0109012	-6.51937	7.54982e-05	0.00127802	yes	down	0.0629139	0.122689	0.0495574	0	0	0	0.0783867	0	FYB2-201	activation-dependent, raft-recruited ADAP-like phosphoprotein isoform X1 [Sus scrofa]	XP_020952236.1
Chr06_14477450_14494363	MSTRG.15243	0.00308996	-8.33819	2.87419e-09	2.13601e-07	yes	down	0.320861	0.245378	0.266371	0	0	0	0.277536	0	0	0	NP_001090919.2
Chr06_151965136_151966420	MSTRG.18461,Pig.13733	0.14422	-2.79366	0.0494706	0.179662	yes	down	0.0188742	0.0230042	0.0247787	0.0177063	0	0	0.022219	0.00590211	#N/A	#N/A	#N/A
Chr06_153612359_153623429	MSTRG.18532	0.00122189	-9.67667	1.53725e-05	0.0003631	yes	down	0.861921	0.958506	0.291149	0	0	0	0.703859	0	0	0	XP_020949549.1
Chr06_153612359_153633119		0.0185175	-5.75497	0.00259091	0.0198854	yes	down	0.031457	0.107353	0	0	0	0	0.0462699	0	#N/A	#N/A	#N/A
Chr06_153617949_153633119		0.0217733	-5.52129	0.00293783	0.0221017	yes	down	0.0503312	0.0690125	0	0	0	0	0.0397812	0	#N/A	#N/A	#N/A
Chr06_154116588_154120137	Pig.12804	0.0889365	-3.49108	0.0349366	1	yes	down	0.0251656	0.0613444	0.018584	0	0	0.0176757	0.0350313	0.00589189	CDH1-203	cadherin-1 precursor [Sus scrofa]	NP_001156532.1
Chr06_154116588_154127479	Pig.12804	0.0219248	-5.51129	0.00601983	1	yes	down	0.0188742	0.0536764	0.0433627	0	0	0	0.0386377	0	CDH1-203	cadherin-1 precursor [Sus scrofa]	NP_001156532.1
Chr06_155000411_155008064		0.13511	-2.88779	5.91191e-06	0.000170247	yes	down	0.18245	0.115021	0.142477	0.0177063	0.049163	0.0441892	0.14665	0.0370195	#N/A	#N/A	#N/A
Chr06_155000411_155043253		0.0219541	-5.50937	0.0235974	1	yes	down	0.0377484	0.0230042	0.055752	0	0	0	0.0388348	0	#N/A	#N/A	#N/A
Chr06_155000411_155071136		0.028142	-5.15113	0.0105483	1	yes	down	0.0188742	0.0153361	0.055752	0	0	0	0.0299874	0	#N/A	#N/A	#N/A
Chr06_157262381_157268589	MSTRG.18617	0.0214491	-5.54294	0.00193146	0.0160359	yes	down	0.0377484	0	0.0805307	0	0	0	0.0394264	0	0	0	XP_020949508.1
Chr06_157272705_157273018	MSTRG.18617	0.0338157	-4.88616	0.0142389	1	yes	down	0.0188742	0	0.055752	0	0	0	0.0248754	0	0	0	XP_020949508.1
Chr06_160725112_160742417	Pig.15713	3.78542	1.92045	0.00147645	0.0133137	yes	up	0.0566225	0.0383403	0.055752	0.442659	0.360528	0.24746	0.0502383	0.350215	CFDP1-201	craniofacial development protein 1 [Sus scrofa]	XP_020949434.1
Chr06_16454294_16468192		0.0284542	-5.13522	0.0278072	0.118198	yes	down	0.0188742	0.0460083	0.0247787	0	0	0	0.0298871	0	#N/A	#N/A	#N/A
Chr06_16853479_16911354		0.0258286	-5.27489	0.0207158	1	yes	down	0.0503312	0	0.0495574	0	0	0	0.0332962	0	#N/A	#N/A	#N/A
Chr06_16875956_16911354	Pig.15137	0.0741783	-3.75286	1.39064e-05	0.000338983	yes	down	0.213907	0.0843486	0.216813	0.0265595	0	0.0441892	0.17169	0.0235829	FGGY-202	FGGY carbohydrate kinase domain-containing protein isoform X5 [Sus scrofa]	XP_020953459.1
Chr06_169608196_169618090	Pig.15499	0.233014	-2.10151	0.000200208	0.00278655	yes	down	0.0817881	0.115021	0.0805307	0.0265595	0.0573568	0.0353514	0.0924465	0.0397559	MTHFSD-201	methenyltetrahydrofolate synthase domain-containing protein isoform X1 [Sus scrofa]	XP_020949357.1
Chr06_21251698_21254121	Pig.05259	0.0790336	-3.66139	0.0361132	0.143277	yes	down	0	0	0.0309733	0	0	0	0.0103244	0	PGM1-201	phosphoglucomutase-1 isoform X2 [Sus scrofa]	XP_020949232.1
Chr06_34537471_34546764		2.59476	1.3756	0.0205355	0.0979894	yes	up	0.0566225	0.0766805	0.0867254	0.265595	0.344141	0.459568	0.0733428	0.356435	#N/A	#N/A	#N/A
Chr06_3676548_3758580	MSTRG.14981	0.222268	-2.16963	0.0247844	0.109925	yes	down	0.0251656	0.0536764	0.0867254	0.0177063	0.0163877	0.0353514	0.0551891	0.0231485	0	0	XP_003128092.3
Chr06_3710003_3758580	MSTRG.14981	0.381194	-1.3914	0.000200165	0.00278655	yes	down	0.213907	0.245378	0.402653	0.177063	0.245815	0.194432	0.287313	0.20577	0	0	XP_003128092.3
Chr06_3732683_3758580	MSTRG.14981	0.239733	-2.0605	1.55533e-05	0.000364545	yes	down	0.163576	0.115021	0.235397	0.0708254	0.0983259	0.0618649	0.171331	0.0770054	0	0	XP_003128092.3
Chr06_40368775_40376408		64.6092	6.01367	4.3782e-06	0.000129518	yes	up	0	0	0	0.0619722	0.204846	0.185595	0	0.150804	#N/A	#N/A	#N/A
Chr06_40375921_40376408		17.9759	4.16799	0.00288659	0.0217709	yes	up	0	0	0	0.053119	0.0245815	0.0441892	0	0.0406299	#N/A	#N/A	#N/A
Chr06_4916952_4924189	Pig.12612	0.0749471	-3.73798	0.0398002	1	yes	down	0	0.0153361	0.018584	0	0	0	0.0113067	0	EFCAB14-201	EF-hand calcium-binding domain-containing protein 14 isoform X4 [Sus scrofa]	XP_020952370.1
Chr06_49238260_49238933	Pig.02789	14.8179	3.88927	3.6533e-09	2.65038e-07	yes	up	0	0.0306722	0.037168	0.398393	0.630925	0.848433	0.0226134	0.625917	KIAA1328-202	protein hinderin isoform X5 [Sus scrofa]	XP_020951945.1
Chr06_54767318_54781593	Pig.03600	54.9571	5.78023	0.000379062	0.00462001	yes	up	0	0	0	0.0354127	0.139295	0.212108	0	0.128939	B4GALT6-201	beta-1,4-galactosyltransferase 6 [Sus scrofa]	XP_003127934.2
Chr06_54767318_54799712	Pig.03600	25.564	4.67604	0.000126675	0.00190327	yes	up	0.0188742	0	0	0.177063	0.458854	0.300487	0.00629139	0.312135	B4GALT6-201	beta-1,4-galactosyltransferase 6 [Sus scrofa]	XP_003127934.2
Chr06_54767318_54808170	Pig.03600	56.9122	5.83067	0.00220701	0.0175581	yes	up	0	0	0	0.053119	0.180264	0.167919	0	0.133767	B4GALT6-201	beta-1,4-galactosyltransferase 6 [Sus scrofa]	XP_003127934.2
Chr06_59501294_59527059	Pig.03615	6.56075	2.71386	6.4266e-05	0.00113848	yes	up	0.0125828	0	0.0433627	0.185917	0.262202	0.273973	0.0186485	0.240697	TAF4B-201	transcription initiation factor TFIID subunit 4B [Sus scrofa]	XP_003127923.1
Chr06_59614387_59640281	Pig.03617	2.64999	1.40599	0.00652795	0.0410964	yes	up	0.0440398	0.0306722	0.0495574	0.159357	0.286784	0.176757	0.0414231	0.207633	SS18-203	PREDICTED: protein SSXT [Otolemur garnettii]	XP_004742918.1
Chr06_61228450_61283077	MSTRG.15623,Pig.03622	3.60254	1.84901	0.00354965	0.0256403	yes	up	0.031457	0.0383403	0.018584	0.106238	0.237621	0.24746	0.0294604	0.197106	#N/A	#N/A	#N/A
Chr06_61490852_61503632	Pig.03624	0.124703	-3.00343	0.000496871	0.00577849	yes	down	0.188742	0.168697	0.0867254	0.0442659	0.0573568	0	0.148055	0.0338742	TTC39C-202	tetratricopeptide repeat protein 39C isoform X1 [Sus scrofa]	XP_003356432.3
Chr06_6319537_6337357	Pig.12596	12.7668	3.67433	0.0266744	0.115123	yes	up	0	0	0	0.0354127	0.0245815	0.0265135	0	0.0288359	SPATA6-201	spermatogenesis-associated protein 6 [Sus scrofa]	NP_001171388.1
Chr06_63426858_63485048	Pig.03641	4.04766	2.01709	0.0466821	0.173253	yes	up	0.0125828	0.0230042	0	0.106238	0.0573568	0.0883784	0.0118623	0.0839911	MIB1-201	PREDICTED: E3 ubiquitin-protein ligase MIB1 [Oryctolagus cuniculus]	XP_002713497.1
Chr06_71794909_71807159	Pig.03687	0.108342	-3.20634	0.0179437	0.0884698	yes	down	0.031457	0.0536764	0	0	0.0163877	0	0.0283778	0.00546255	ANKRD12-201	ankyrin repeat domain-containing protein 12 isoform X1 [Sus scrofa]	XP_020951722.1
Chr06_72055229_72057078	Pig.03690	2.30565	1.20518	0.00895459	0.0518719	yes	up	0.0692053	0.0383403	0.0433627	0.19477	0.262202	0.194432	0.0503028	0.217135	PPP4R1-201	serine/threonine-protein phosphatase 4 regulatory subunit 1 isoform X1 [Sus scrofa]	XP_020951717.1
Chr06_75473544_75484018	Pig.02961	0.0575778	-4.11834	0.00978253	0.0550341	yes	down	0.0251656	0	0.018584	0	0	0	0.0145832	0	MACF1-201	PREDICTED: microtubule-actin cross-linking factor 1, isoforms 1/2/3/5 isoform X6 [Balaenoptera acutorostrata scammoni]	XP_029086933.1
Chr06_770215_796587		0.0151419	-6.04531	7.33974e-05	0.00125642	yes	down	0.0440398	0.0306722	0.09292	0	0	0	0.0558773	0	#N/A	#N/A	#N/A
Chr06_78493883_78508305	Pig.03001	0.199301	-2.32698	0.0448229	0.167783	yes	down	0.0251656	0.0230042	0.0681414	0.0265595	0.0163877	0	0.0387704	0.0143157	AGO1-202	protein argonaute-3 [Bos taurus]	NP_001001133.2
Chr06_785554_796587	Pig.18898	0.210523	-2.24795	0.00578078	0.037239	yes	down	0.0692053	0.0690125	0.0619467	0.0354127	0.0245815	0.0176757	0.0667215	0.0258899	Ccdc30	coiled-coil domain-containing protein 30 [Sus scrofa]	XP_020952582.1
Chr06_79097366_79100251	Pig.03010	0.175563	-2.50994	0.0353725	0.141443	yes	down	0.0251656	0.0230042	0.0309733	0	0	0.0265135	0.026381	0.00883784	ZMYM4-201	zinc finger MYM-type protein 4 isoform X2 [Sus scrofa]	XP_020951559.1
Chr06_79118478_79127999	Pig.03010	4.33097	2.11469	9.59201e-05	0.00154639	yes	up	0.0377484	0.0230042	0.0619467	0.345274	0.393304	0.265135	0.0408997	0.334571	ZMYM4-201	zinc finger MYM-type protein 4 isoform X2 [Sus scrofa]	XP_020951559.1
Chr06_82248210_82252053		9.89017	3.306	0.049137	0.178664	yes	up	0	0	0	0	0.0163877	0.053027	0	0.0231382	#N/A	#N/A	#N/A
Chr06_89512529_89516131	Pig.03192	0.0212416	-5.55696	0.00024732	0.00329076	yes	down	0.0377484	0.0460083	0.037168	0	0	0	0.0403082	0	HNRNPR-201	heterogeneous nuclear ribonucleoprotein R isoform X2 [Heterocephalus glaber]	XP_020951171.1
Chr06_91462220_91499257	Pig.03215	8.74606	3.12863	0.0096219	0.0543932	yes	up	0	0.0153361	0	0.106238	0.049163	0.0618649	0.00511203	0.072422	EIF4G3-201	eukaryotic translation initiation factor 4 gamma 3 isoform X9 [Ictidomys tridecemlineatus]	XP_022407465.1
Chr06_9306511_9324795	Pig.14732	0.0432555	-4.53097	0.00656688	0.0411396	yes	down	0.0188742	0.0153361	0.0247787	0	0	0	0.019663	0	OSBPL9-202	oxysterol-binding protein-related protein 9 isoform X1 [Sus scrofa]	XP_005665492.2
Chr06_9307653_9327220	Pig.14732	0.123148	-3.02154	0.0067764	0.0416284	yes	down	0.0251656	0.0306722	0.09292	0	0	0.0353514	0.0495859	0.0117838	OSBPL9-202	oxysterol-binding protein-related protein 9 isoform X1 [Sus scrofa]	XP_005665492.2
Chr06_9324691_9327220	Pig.14732	0.249149	-2.00492	0.0491159	0.178664	yes	down	0.0440398	0.0460083	0.018584	0	0.0327753	0.0176757	0.0362107	0.016817	OSBPL9-202	oxysterol-binding protein-related protein 9 isoform X1 [Sus scrofa]	XP_005665492.2
Chr06_96048045_96062663	Pig.08606	0.108994	-3.19767	2.75968e-06	8.58036e-05	yes	down	0.176159	0.107353	0.223008	0.0354127	0.0409691	0.0265135	0.16884	0.0342984	DDI1-201	PREDICTED: protein DDI1 homolog 2 isoform X2 [Orcinus orca]	XP_012389449.1
Chr06_96055937_96062663	Pig.08606	0.0270044	-5.21066	0.000954136	0.00972325	yes	down	0.0377484	0.0460083	0.0123893	0	0	0	0.0320487	0	DDI1-201	PREDICTED: protein DDI1 homolog 2 isoform X2 [Orcinus orca]	XP_012389449.1
Chr06_97673903_97683457	Pig.08596	30.5611	4.93363	0.0100521	0.0561993	yes	up	0	0	0	0.0265595	0.0819383	0.106054	0	0.0715173	PRDM2-202	LOW QUALITY PROTEIN: PR domain zinc finger protein 2 [Sus scrofa]	XP_020953220.1
Chr06_9953190_9955184	Pig.14721	13.8602	3.79287	0.0464206	0.172492	yes	up	0	0	0	0	0.0737444	0.0265135	0	0.0334193	TUT4-202	terminal uridylyltransferase 4 isoform X4 [Sus scrofa]	XP_020952296.1
Chr07_102162754_102172864	MSTRG.21103,Pig.08859	13.7416	3.78048	0.00105149	0.0102381	yes	up	0.0188742	0	0	0.230182	0.147489	0.106054	0.00629139	0.161242	#N/A	#N/A	#N/A
Chr07_104353059_104373328		0.0112128	-6.47871	1.54479e-06	5.23739e-05	yes	down	0.0692053	0.0460083	0.111504	0	0	0	0.0755726	0	#N/A	#N/A	#N/A
Chr07_109969272_109992959	Pig.09261	208.265	7.70228	3.93832e-06	0.000117648	yes	up	0	0	0	0.486924	0.614537	0.327	0	0.476154	ADGRF5-201	LOW QUALITY PROTEIN: adhesion G protein-coupled receptor F5 [Sus scrofa]	XP_013833469.2
Chr07_117732099_117751952	Pig.13511	17.1168	4.09734	0.0414237	0.158765	yes	up	0	0	0	0.0177063	0.049163	0.053027	0	0.0399654	BTBD9-202	BTB/POZ domain-containing protein 9 isoform X1 [Sus scrofa]	XP_020953758.1
Chr07_121154190_121180103	Pig.17302	0.0188802	-5.72698	0.000106457	0.00166548	yes	down	0.0377484	0.0613444	0.037168	0	0	0	0.0454203	0	ILRUN-201	uncharacterized protein C6orf106 homolog isoform 2 [Mus musculus]	NP_001038184.1
Chr07_123113518_123127062		6.78333	2.76199	0.0368129	0.145466	yes	up	0	0	0.0123893	0.0354127	0.0983259	0.0353514	0.00412978	0.0563633	#N/A	#N/A	#N/A
Chr07_125113842_125133389	Pig.13357	7.39183	2.88593	0.0373145	0.146706	yes	up	0	0	0	0	0.0327753	0.0176757	0	0.016817	MLIP-201	muscular LMNA-interacting protein isoform X3 [Sus scrofa]	XP_020954178.1
Chr07_127317226_127328596	Pig.11473	89.4859	6.48359	7.47275e-06	0.000206331	yes	up	0	0	0	0.380686	0.114714	0.0883784	0	0.194593	Tnxb	tenascin-X isoform X5 [Sus scrofa]	XP_020953995.1
Chr07_128486884_128504793		0.0475768	-4.3936	0.000328776	0.00412918	yes	down	0.106954	0.0460083	0.0433627	0	0	0.0176757	0.0654416	0.00589189	#N/A	#N/A	#N/A
Chr07_13231702_13255523	Pig.06798,MSTRG.19302	24.1686	4.59506	0.00192219	0.0160359	yes	up	0	0	0	0.053119	0.0409691	0.0707027	0	0.0549303	#N/A	#N/A	#N/A
Chr07_20514721_20548703		0.241198	-2.05171	0.0396749	0.153739	yes	down	0.0188742	0.0690125	0.0433627	0	0.0245815	0.0353514	0.0437498	0.0199776	#N/A	#N/A	#N/A
Chr07_20538732_20548703		0.296716	-1.75285	3.18407e-05	0.00064679	yes	down	0.163576	0.199369	0.235397	0.141651	0.0901321	0.0972162	0.199448	0.109666	#N/A	#N/A	#N/A
Chr07_23444137_23455147	Pig.19585	8.05776	3.01038	9.87081e-08	5.37078e-06	yes	up	0.0251656	0.0536764	0.0123893	0.486924	0.401498	0.415378	0.0304104	0.4346	TUBB2B-205	Tubulin beta-2A chain [Fukomys damarensis]	XP_025838410.1
Chr07_27254559_27254972	Pig.18239	0.340576	-1.55395	0.0184943	0.0907892	yes	down	0.132119	0.0843486	0.117699	0.0708254	0.114714	0.0265135	0.111389	0.0706842	KLC4-201	kinesin light chain 1 isoform X3 [Sus scrofa]	XP_020937194.1
Chr07_27323274_27324765	Pig.18238	15.794	3.9813	0.0428944	1	yes	up	0	0	0	0.0619722	0.0245815	0.0176757	0	0.0347431	USF2-201	apoptogenic protein 1, mitochondrial [Sus scrofa]	XP_020937172.1
Chr07_27536734_27537380	Pig.18233	0.0681714	-3.87469	0.00125243	0.0115992	yes	down	0.0377484	0.0460083	0.0495574	0	0.0163877	0	0.044438	0.00546255	EIF5	PREDICTED: eukaryotic translation initiation factor 5 isoform X1 [Myotis lucifugus]	XP_015455206.1
Chr07_27538055_27538693	Pig.18233	7.39652	2.88685	0.0371177	0.14631	yes	up	0.0125828	0	0	0.0973849	0.049163	0.0265135	0.00419426	0.0576871	EIF5	PREDICTED: eukaryotic translation initiation factor 5 isoform X1 [Myotis lucifugus]	XP_015455206.1
Chr07_27765979_27767871	Pig.18231	2.66321	1.41317	0.0130159	0.0694563	yes	up	0.0566225	0.0460083	0.0495574	0.256742	0.245815	0.24746	0.0507294	0.250005	CDC42BPA-205	serine/threonine-protein kinase MRCK beta isoform X2 [Sus scrofa]	XP_020937280.1
Chr07_33696516_33706280	Pig.19099	10.8	3.43296	0.00534569	0.0351288	yes	up	0	0	0.0123893	0.0265595	0.21304	0.0353514	0.00412978	0.0916501	PAPOLA-201	poly(A) polymerase alpha isoform X4 [Sus scrofa]	XP_001929110.1(poly
Chr07_35015014_35023525	Pig.20280	15.2757	3.93317	0.0354511	0.141572	yes	up	0	0	0	0	0.0655506	0.0441892	0	0.0365799	DICER1-203	endoribonuclease Dicer isoform X1 [Sus scrofa]	XP_020953825.1
Chr07_35410729_35446616	MSTRG.19801	1.16063e-07	-23.0386	0.00130022	0.0120053	yes	down	2.1202	2.39243	4.89379	0	0	0	3.13547	0	0	0	XP_001928879.1
Chr07_35415757_35450947	MSTRG.19801	6.66131e-08	-23.8396	5.5765e-07	2.30367e-05	yes	down	4.72484	6.04242	4.93096	0	0	0	5.23274	0	0	0	XP_001928879.1
Chr07_35429135_35449112	MSTRG.19801	9.43356e-08	-23.3376	3.23198e-12	4.28167e-10	yes	down	6.33543	4.90755	4.80706	0	0	0	5.35002	0	0	0	XP_001928879.1
Chr07_35448459_35546999		0.00040914	-11.2551	1.11429e-25	1.69761e-22	yes	down	12.9414	17.9969	14.4274	0	0	0.0353514	15.1219	0.0117838	#N/A	#N/A	#N/A
Chr07_35477234_35532048		0.00046036	-11.0849	1.06154e-06	3.89702e-05	yes	down	1.18907	1.35724	2.97344	0	0	0	1.83992	0	#N/A	#N/A	#N/A
Chr07_36723571_36725562		16.8714	4.07651	1.04037e-13	1.76112e-11	yes	up	0.0503312	0	0.0123893	0.53119	0.868546	0.671676	0.0209068	0.690471	#N/A	#N/A	#N/A
Chr07_40977558_41008484	MSTRG.19933,Pig.12022	4.50403	2.17122	0.0355771	0.141889	yes	up	0	0	0.0247787	0.106238	0.0655506	0.0441892	0.00825956	0.0719926	#N/A	#N/A	#N/A
Chr07_4174021_4175523		0.020161	-5.63229	0.000264293	0.00345622	yes	down	0.0377484	0.0460083	0.0433627	0	0	0	0.0423731	0	#N/A	#N/A	#N/A
Chr07_4187796_4228953		0.0149247	-6.06615	0.019497	1	yes	down	0.100662	0.0306722	0.0433627	0	0	0	0.0582324	0	#N/A	#N/A	#N/A
Chr07_4216731_4224186	Pig.15418	0.0125751	-6.31329	0.000126801	0.00190327	yes	down	0.0880795	0.0613444	0.055752	0	0	0	0.068392	0	SLC17A3-202	sodium-dependent phosphate transport protein 4 isoform X1 [Sus scrofa]	XP_020954076.1
Chr07_4267797_4268205	Pig.15419	0.00290587	-8.42681	1.5261e-11	1.60346e-09	yes	down	0.207616	0.414075	0.260176	0	0	0	0.293956	0	SLC17A1-202	sodium-dependent phosphate transport protein 1 isoform X1 [Sus scrofa]	XP_020953970.1
Chr07_4302776_4309255	Pig.15420	0.0119096	-6.39173	0.000227558	0.0030954	yes	down	0.119536	0.0996847	0	0	0	0	0.0730737	0	SLC17A4-205	probable small intestine urate exporter isoform X3 [Sus scrofa]	XP_020954070.1
Chr07_47929696_47931535	Pig.08875	0.0467817	-4.41791	0.0216739	0.101601	yes	down	0.0251656	0.0306722	0	0	0	0	0.0186126	0	STON2-202	stonin-2 isoform X2 [Sus scrofa]	XP_020955239.1
Chr07_54046395_54049908	Pig.19270	0.0829898	-3.59092	0.00864939	0.0505366	yes	down	0.0125828	0.0383403	0.055752	0	0.0163877	0	0.0355584	0.00546255	AREL1-201	apoptosis-resistant E3 ubiquitin protein ligase 1 isoform X1 [Sus scrofa]	XP_003356794.1
Chr07_59192667_59200006	Pig.04323	0.486322	-1.04002	0.025062	0.110833	yes	down	0.0943709	0.107353	0.117699	0.0796785	0.139295	0.0707027	0.106474	0.0965588	DCAF5-201	DDB1- and CUL4-associated factor 5 isoform X1 [Sus scrofa]	XP_020955057.1
Chr07_61199248_61296019	Pig.04303	0.449217	-1.15452	0.0121757	0.0654309	yes	down	0.163576	0.145693	0.136283	0.115091	0.114714	0.141405	0.148517	0.123737	GPHN-207	gephyrin isoform X1 [Sus scrofa]	XP_020953661.1
Chr07_76414473_76415599	MSTRG.20436,Pig.10980	4.62002	2.2079	0.00186837	0.0157263	yes	up	0.0188742	0.0153361	0.0309733	0.301008	0.0983259	0.150243	0.0217279	0.183192	#N/A	#N/A	#N/A
Chr07_78284745_78314204	MSTRG.20541	41.586	5.37803	0.0474304	0.174964	yes	up	0	0	0	0.0177063	0.270396	0.0176757	0	0.101926	0	0	XP_020954893.1
Chr07_85433213_85452842	Pig.08415	7.88742	2.97955	0.000891817	0.00924274	yes	up	0.031457	0	0	0.177063	0.122907	0.167919	0.0104857	0.155963	STRN-201	striatin-3 isoform X1 [Sus scrofa]	XP_020955544.1
Chr07_85446229_85452842	Pig.08415	5.62342	2.49145	0.000599916	0.00659908	yes	up	0.0503312	0	0.037168	0.354127	0.286784	0.282811	0.0291664	0.307907	STRN-201	striatin-3 isoform X1 [Sus scrofa]	XP_020955544.1
Chr07_85797913_85806784		2.68309	1.4239	0.00427543	0.0298106	yes	up	0.031457	0.0460083	0.055752	0.239036	0.237621	0.185595	0.0444058	0.22075	#N/A	#N/A	#N/A
Chr07_86387061_86413156		3.91717	1.96981	0.0416828	0.159357	yes	up	0.0125828	0	0.037168	0.177063	0.0737444	0.114892	0.0165836	0.1219	#N/A	#N/A	#N/A
Chr07_89654045_89678109	Pig.08443	24.2304	4.59874	0.0330057	0.13427	yes	up	0	0	0	0.0708254	0.0573568	0.0353514	0	0.0545112	RALGAPA1-201	ral GTPase-activating protein subunit alpha-1 isoform X7 [Sus scrofa]	XP_020954818.1
Chr07_89693469_89694186	Pig.08443	30.2823	4.9204	0.000269425	0.00350828	yes	up	0	0	0	0.0885317	0.0819383	0.0353514	0	0.0686071	RALGAPA1-201	ral GTPase-activating protein subunit alpha-1 isoform X7 [Sus scrofa]	XP_020954818.1
Chr07_95086666_95104859	MSTRG.20849	0.214934	-2.21803	0.000137764	0.00204765	yes	down	0.100662	0.0690125	0.111504	0.053119	0.0245815	0.0353514	0.0937263	0.037684	0	0	XP_001927907.1
Chr07_95837296_95842021	Pig.17585	2.98806	1.57921	0.0217399	0.10165	yes	up	0	0.0230042	0.0495574	0.150504	0.122907	0.132568	0.0241872	0.135326	PTPN9-201	tyrosine-protein phosphatase non-receptor type 9 isoform X1 [Sus scrofa]	XP_003128529.1
Chr07_97375124_97377963	Pig.08771	0.193243	-2.37152	0.000537466	0.00615555	yes	down	0.0629139	0.0843486	0.117699	0.0442659	0.0245815	0.0265135	0.0883204	0.031787	ETFA-201	electron transfer flavoprotein subunit alpha, mitochondrial [Sus scrofa]	NP_001231332.1
Chr07_97375124_97392874	Pig.08771	0.218622	-2.19349	0.00419511	0.0293177	yes	down	0.0943709	0.107353	0.111504	0.0442659	0.0655506	0.0176757	0.104409	0.0424974	ETFA-201	electron transfer flavoprotein subunit alpha, mitochondrial [Sus scrofa]	NP_001231332.1
Chr07_97598783_97651052		27.6876	4.79117	0.000596765	0.0065882	yes	up	0	0	0	0.053119	0.0573568	0.0795406	0	0.0633388	#N/A	#N/A	#N/A
Chr07_97649092_97651052		31.7414	4.98829	0.000824971	0.00861735	yes	up	0	0	0	0.053119	0.114714	0.053027	0	0.0736199	#N/A	#N/A	#N/A
Chr07_97789171_97799770	Pig.08775	78.0131	6.28564	1.32265e-05	0.000326564	yes	up	0	0	0	0.221329	0.229427	0.0795406	0	0.176766	FBXO22-202	ubiquitin-conjugating enzyme E2 Q2 isoform X1 [Sus scrofa]	XP_020954668.1
Chr08_103821701_103827202	Pig.01006	18.4552	4.20596	0.00558796	0.0363815	yes	up	0	0	0	0.0708254	0.0163877	0.0353514	0	0.0408548	BBS7-201	PREDICTED: Bardet-Biedl syndrome 7 protein isoform X2 [Chinchilla lanigera]	XP_026959428.1
Chr08_114684141_114685006	Pig.00666	26.4212	4.72362	0.00179979	0.0153613	yes	up	0	0	0	0.0619722	0.0655506	0.053027	0	0.0601833	SEC24B-203	protein transport protein Sec24B isoform X1 [Sus scrofa]	XP_020957338.1
Chr08_115366834_115376634	Pig.00663	0.190927	-2.38891	0.0406639	0.156839	yes	down	0.0440398	0.0690125	0.0433627	0	0.0573568	0	0.0521383	0.0191189	ETNPPL-201	ethanolamine-phosphate phospho-lyase isoform X1 [Sus scrofa]	XP_020957345.1
Chr08_115373299_115376634	Pig.00663	0.0578184	-4.11233	6.62458e-05	0.00116677	yes	down	0.0754967	0.138025	0.09292	0	0.0327753	0	0.102147	0.0109251	ETNPPL-201	ethanolamine-phosphate phospho-lyase isoform X1 [Sus scrofa]	XP_020957345.1
Chr08_115962710_115977373	Pig.00658	0.431102	-1.2139	0.0332535	0.134989	yes	down	0.0880795	0.145693	0.0619467	0.0442659	0.131101	0.0618649	0.0985731	0.0790773	HADH-202	hydroxyacyl-coenzyme A dehydrogenase, mitochondrial precursor [Sus scrofa]	NP_999496.1
Chr08_117809709_117824540	Pig.00649	0.0107664	-6.53732	4.13475e-05	0.000786799	yes	down	0.0943709	0.0766805	0.0681414	0	0	0	0.0797309	0	NPNT-201	nephronectin isoform X1 [Sus scrofa]	XP_020957362.1
Chr08_118273370_118291983	Pig.00645	0.269277	-1.89284	0.000657178	0.00710079	yes	down	0.559934	0.268382	0.291149	0.239036	0.147489	0.159081	0.373155	0.181869	PPA2-206	inorganic pyrophosphatase 2, mitochondrial isoform X1 [Sus scrofa]	XP_020957372.1
Chr08_132680868_132689143	Pig.00585	0.0510418	-4.29218	0.0339014	0.136818	yes	down	0.0125828	0.0383403	0	0	0	0	0.0169743	0	HERC5-203	E3 ISG15--protein ligase HERC5 [Sus scrofa]	XP_020956425.1
Chr08_133537058_133555553	Pig.00571	0.018113	-5.78683	0.00114423	0.0107869	yes	down	0.031457	0.0153361	0.09292	0	0	0	0.046571	0	TRPM2-201	ADP-ribose pyrophosphatase, mitochondrial isoform X1 [Sus scrofa]	XP_003357134.1
Chr08_133538651_133555553	Pig.00571	0.0282565	-5.14527	0.00855688	1	yes	down	0.0503312	0.0230042	0.018584	0	0	0	0.0306398	0	TRPM2-201	ADP-ribose pyrophosphatase, mitochondrial isoform X1 [Sus scrofa]	XP_003357134.1
Chr08_133546769_133555553	Pig.00571	0.0701722	-3.83296	0.0151716	0.0787253	yes	down	0.031457	0.0383403	0.0619467	0	0	0.0176757	0.0439146	0.00589189	TRPM2-201	ADP-ribose pyrophosphatase, mitochondrial isoform X1 [Sus scrofa]	XP_003357134.1
Chr08_133608977_133616275	Pig.00570	0.0303415	-5.04256	0.0011221	0.010718	yes	down	0.031457	0.0153361	0.037168	0	0	0	0.027987	0	HSD17B11-201	estradiol 17-beta-dehydrogenase 11 [Sus scrofa]	XP_020957431.1
Chr08_134151856_134156872	Pig.00564	35.3595	5.14403	0.0284768	1	yes	up	0	0	0	0.0354127	0.0409691	0.167919	0	0.0814336	PTPN13-201	LOW QUALITY PROTEIN: tyrosine-protein phosphatase non-receptor type 13 [Sus scrofa]	XP_013834505.2
Chr08_134205463_134227525		25.3368	4.66317	0.018914	1	yes	up	0	0	0	0.0619722	0.0573568	0.053027	0	0.057452	#N/A	#N/A	#N/A
Chr08_137907029_137913935	Pig.00539	0.235958	-2.0834	0.0175961	0.0871795	yes	down	0.0566225	0.107353	0.018584	0.0354127	0.0163877	0.0265135	0.0608531	0.0261046	ENOPH1-202	enolase-phosphatase E1 [Sus scrofa]	NP_001230759.1
Chr08_139877592_139902897	Pig.00525	0.406111	-1.30005	0.0159712	0.0813335	yes	down	0.188742	0.253046	0.09292	0.0973849	0.155683	0.150243	0.178236	0.134437	ANTXR2-205	anthrax toxin receptor 2 [Sus scrofa]	XP_003129419.3
Chr08_15198920_15200822	MSTRG.22096,Pig.04165	0.0167179	-5.90246	0.000114976	0.00175362	yes	down	0.0440398	0.0920166	0.018584	0	0	0	0.0515468	0	#N/A	#N/A	#N/A
Chr08_15357160_15363180	Pig.04163	7.84716	2.97217	0.000209624	0.00290329	yes	up	0.0188742	0.0230042	0	0.265595	0.122907	0.185595	0.0139594	0.191366	GUCY1B1-201	PREDICTED: guanylate cyclase soluble subunit beta-1 [Bubalus bubalis]	XP_004421004.1
Chr08_1703929_1711045	Pig.20462	0.336321	-1.57209	0.0277184	0.118123	yes	down	0.125828	0.0383403	0.09292	0.0354127	0.0737444	0.053027	0.0856961	0.0540614	TBC1D14	LOW QUALITY PROTEIN: TBC1 domain family member 14 [Sus scrofa]	XP_020956625.1
Chr08_20859963_20878523	Pig.16697	0.164059	-2.60771	0.00508926	0.0336377	yes	down	0.0440398	0.0230042	0.0433627	0	0.0163877	0.0176757	0.0368022	0.0113544	DCUN1D4-201	PREDICTED: DCN1-like protein 4 isoform X3 [Ceratotherium simum simum]	XP_004419114.1
Chr08_27230303_27261524	Pig.12465	10.3497	3.37151	0.0333196	0.135006	yes	up	0	0	0	0	0.0737444	0	0	0.0245815	LIMCH1-207	LOW QUALITY PROTEIN: LIM and calponin homology domains-containing protein 1 [Sus scrofa]	XP_020956816.1
Chr08_27957202_27994675	Pig.12463	0.476242	-1.07023	0.0221105	0.102699	yes	down	0.157285	0.138025	0.136283	0.141651	0.21304	0.0265135	0.143864	0.127068	APBB2-201	amyloid beta A4 precursor protein-binding family B member 2 isoform X9 [Sus scrofa]	XP_020956809.1
Chr08_28917574_28923061	Pig.07260	15.6631	3.9693	0.0138208	0.0726067	yes	up	0	0	0	0	0.049163	0.0618649	0	0.0370093	PDS5A-201	PREDICTED: sister chromatid cohesion protein PDS5 homolog A isoform X2 [Equus asinus]	XP_014712699.1
Chr08_49633206_49660217	Pig.05336	0.320204	-1.64294	0.00438677	0.0303784	yes	down	0.106954	0.115021	0.0805307	0.0442659	0.0737444	0.0618649	0.100835	0.0599584	CPEB2-201	cytoplasmic polyadenylation element-binding protein 2 isoform X1 [Sus scrofa]	XP_020955979.1
Chr08_57096608_57102797	Pig.19157	0.0488749	-4.35476	0.0309353	1	yes	down	0.0251656	0.0153361	0.0123893	0	0	0	0.0176303	0	SRP72	LOW QUALITY PROTEIN: signal recognition particle subunit SRP72 [Sus scrofa]	XP_020956195.1
Chr08_68850083_68855255	Pig.08308,MSTRG.22655	28.4979	4.83278	0.00112881	0.0107484	yes	up	0	0	0	0.106238	0.0573568	0.0265135	0	0.0633695	#N/A	#N/A	#N/A
Chr08_70741883_70743519	Pig.08320	3.31584	1.72937	0.0205498	0.0979894	yes	up	0	0.0383403	0.0247787	0.106238	0.114714	0.159081	0.0210396	0.126678	ANKRD17-201	ankyrin repeat domain-containing protein 17 isoform X1 [Sus scrofa]	XP_020956038.1
Chr08_71010842_71014371	MSTRG.22686,Pig.08321	0.0226364	-5.46521	0.0439272	1	yes	down	0.0251656	0.0690125	0.018584	0	0	0	0.0375873	0	#N/A	#N/A	#N/A
Chr08_71012313_71017161	MSTRG.22686,Pig.08321	0.00279987	-8.48042	1.25723e-11	1.36813e-09	yes	down	0.22649	0.306722	0.377875	0	0	0	0.303696	0	#N/A	#N/A	#N/A
Chr08_71012313_71018900	MSTRG.22686,Pig.08321	0.00764524	-7.03122	3.48139e-07	1.58325e-05	yes	down	0.0943709	0.122689	0.117699	0	0	0	0.111586	0	#N/A	#N/A	#N/A
Chr08_71012313_71020074	MSTRG.22686,Pig.08321	0.00281621	-8.47203	2.38895e-11	2.3481e-09	yes	down	0.232782	0.391071	0.284955	0	0	0	0.302936	0	#N/A	#N/A	#N/A
Chr08_71014242_71017161	MSTRG.22686,Pig.08321	0.0240782	-5.37613	0.0259251	1	yes	down	0.0440398	0.0383403	0.0247787	0	0	0	0.0357196	0	#N/A	#N/A	#N/A
Chr08_71021523_71023766	MSTRG.22686	0.00298996	-8.38566	2.82519e-11	2.69011e-09	yes	down	0.289404	0.283718	0.284955	0	0	0	0.286026	0	0	0	NP_001005208.1
Chr08_71078825_71082407	Pig.08323	0.0248838	-5.32865	0.00439144	1	yes	down	0.0125828	0.0460083	0.0433627	0	0	0	0.0339846	0	AFM-203	afamin isoform X1 [Sus scrofa]	XP_003357020.1
Chr08_71078825_71090128		0.0115226	-6.43938	1.85608e-05	0.000414067	yes	down	0.0754967	0.0920166	0.055752	0	0	0	0.0744218	0	#N/A	#N/A	#N/A
Chr08_71080336_71084796	Pig.08323	0.00267546	-8.54599	3.73805e-12	4.74577e-10	yes	down	0.352318	0.291386	0.315928	0	0	0	0.319877	0	AFM-203	afamin isoform X1 [Sus scrofa]	XP_003357020.1
Chr08_71086089_71090128		0.0326123	-4.93844	0.0379421	1	yes	down	0.0125828	0.0153361	0.0495574	0	0	0	0.0258254	0	#N/A	#N/A	#N/A
Chr08_71418686_71512101		6.09599	2.60786	0.00207661	0.0168282	yes	up	0	0.0460083	0.0247787	0.424952	0.262202	0.0795406	0.0235957	0.255565	#N/A	#N/A	#N/A
Chr08_71559017_71589737	Pig.08332	0.0302667	-5.04613	0.000998743	0.00999368	yes	down	0.0503312	0.0230042	0.0123893	0	0	0	0.0285749	0	MTHFD2-201	PREDICTED: probable bifunctional methylenetetrahydrofolate dehydrogenase/cyclohydrolase 2 [Bos mutus]	XP_005891322.1
Chr08_71559017_71632364	Pig.08332	0.0270858	-5.20632	0.000191375	0.00275056	yes	down	0.031457	0.0460083	0.018584	0	0	0	0.0320164	0	MTHFD2-201	PREDICTED: probable bifunctional methylenetetrahydrofolate dehydrogenase/cyclohydrolase 2 [Bos mutus]	XP_005891322.1
Chr08_77831737_77832126	Pig.19604	11.807	3.56157	0.0475721	1	yes	up	0	0	0	0.0177063	0.0655506	0	0	0.0277523	TMEM154-201	transmembrane protein 154 isoform X2 [Sus scrofa]	XP_020957169.1
Chr08_87802538_87815783	Pig.01059	23.932	4.58087	0.00286443	0.0216574	yes	up	0	0	0	0	0.0819383	0.0883784	0	0.0567722	RNF150-202	LOW QUALITY PROTEIN: RING finger protein 150 [Sus scrofa]	XP_020957213.1
Chr08_89060362_89088138	Pig.01050	14.1052	3.81815	0.0225288	0.103851	yes	up	0	0	0	0	0.0655506	0.0353514	0	0.033634	SETD7-201	histone-lysine N-methyltransferase SETD7 isoform X2 [Sus scrofa]	XP_020957219.1
Chr08_98373397_98395063	Pig.01030	0.048515	-4.36543	0.00699629	0.0427208	yes	down	0.0188742	0.0153361	0.018584	0	0	0	0.0175981	0	LARP1B-201	la-related protein 1B isoform X1 [Sus scrofa]	XP_013834346.2
Chr08_98411085_98414415	Pig.01030	0.0401636	-4.63797	0.0392875	1	yes	down	0.0503312	0.0153361	0	0	0	0	0.0218891	0	LARP1B-201	la-related protein 1B isoform X1 [Sus scrofa]	XP_013834346.2
Chr08_98428798_98446659	Pig.01030	0.225112	-2.15129	0.0178756	0.0882771	yes	down	0.100662	0.0383403	0.0619467	0.0177063	0.049163	0.0176757	0.0669831	0.0281817	LARP1B-201	la-related protein 1B isoform X1 [Sus scrofa]	XP_013834346.2
Chr09_10030986_10046260		0.000791985	-10.3022	1.04373e-14	2.27161e-12	yes	down	1.17649	0.858822	1.20796	0	0	0	1.08109	0	#N/A	#N/A	#N/A
Chr09_105808546_105819962	Pig.08232	0.0169634	-5.88143	4.93762e-05	0.000895532	yes	down	0.0503312	0.0383403	0.0619467	0	0	0	0.050206	0	BCO2-203	beta,beta-carotene 9',10'-oxygenase isoform X1 [Sus scrofa]	XP_003129903.2
Chr09_109155145_109193076	Pig.11684	2.97889	1.57478	0.0371748	0.146346	yes	up	0.031457	0.0383403	0	0.132798	0.114714	0.12373	0.0232657	0.123747	PICALM-207	phosphatidylinositol-binding clathrin assembly protein isoform X6 [Sus scrofa]	XP_020957732.1
Chr09_109165747_109193076	Pig.11684	2.02254	1.01617	0.0235703	0.106481	yes	up	0.132119	0.0383403	0.0681414	0.265595	0.311365	0.327	0.0795336	0.30132	PICALM-207	phosphatidylinositol-binding clathrin assembly protein isoform X6 [Sus scrofa]	XP_020957732.1
Chr09_110087896_110112039	Pig.11675	3.68854	1.88305	0.0192791	0.0936898	yes	up	0.0754967	0.0306722	0	0.203623	0.237621	0.273973	0.0353896	0.238406	TMEM135-201	transmembrane protein 135 isoform X1 [Sus scrofa]	XP_020918270.1
Chr09_110087896_110158133	Pig.11675	75.409	6.23666	1.02546e-05	0.000264795	yes	up	0	0	0	0.123944	0.147489	0.24746	0	0.172964	TMEM135-201	transmembrane protein 135 isoform X1 [Sus scrofa]	XP_020918270.1
Chr09_116505101_116511736	MSTRG.25472,Pig.08139	61.7183	5.94763	1.27588e-05	0.000321289	yes	up	0	0	0	0.0708254	0.155683	0.20327	0	0.143259	#N/A	#N/A	#N/A
Chr09_116510800_116511736	MSTRG.25472,Pig.08139	8.83258	3.14283	0.0431878	0.16347	yes	up	0	0	0	0.0177063	0.0163877	0.0265135	0	0.0202025	#N/A	#N/A	#N/A
Chr09_116529537_116538460	MSTRG.25472	3.07607	1.62109	0.044277	0.166706	yes	up	0	0.0306722	0.0309733	0.150504	0.10652	0.0883784	0.0205485	0.115134	0	0	XP_005667294.2
Chr09_117715212_117716726	Pig.08150	7.68531	2.9421	2.69359e-08	1.78421e-06	yes	up	0.0377484	0.0383403	0.018584	0.327567	0.622731	0.397703	0.0315575	0.449334	MAML2-201	mastermind-like protein 2 isoform X2 [Sus scrofa]	XP_020957993.1
Chr09_123940633_123970308	Pig.12906	0.0377625	-4.7269	0.0156446	0.0802508	yes	down	0.0503312	0	0.018584	0	0	0	0.0229717	0	NUP98-202	LOW QUALITY PROTEIN: nuclear pore complex protein Nup98-Nup96 [Sus scrofa]	XP_020918086.1
Chr09_124151096_124157955	Pig.12901	0.119944	-3.05957	0.0337715	0.136475	yes	down	0.132119	0.0153361	0.0247787	0.0354127	0	0	0.0574114	0.0118042	RNF121-201	RING finger protein 121 isoform X1 [Sus scrofa]	XP_003129664.1
Chr09_13195382_13196821	MSTRG.23858,Pig.16438	0.216806	-2.20552	0.0332709	0.134989	yes	down	0.031457	0.0230042	0.0309733	0	0	0.0353514	0.0284782	0.0117838	#N/A	#N/A	#N/A
Chr09_132363589_132363802	MSTRG.25786,Pig.20569	24.2917	4.60239	0.0251431	0.111031	yes	up	0	0	0	0	0.180264	0	0	0.0600881	#N/A	#N/A	#N/A
Chr09_132670293_132697871		0.0226567	-5.46392	0.039277	0.152858	yes	down	0.0754967	0.0153361	0.0247787	0	0	0	0.0385372	0	#N/A	#N/A	#N/A
Chr09_132854062_132873591	Pig.10255	0.257343	-1.95823	0.00208647	0.0168633	yes	down	0.0440398	0.0843486	0.074336	0.0442659	0	0.053027	0.0675748	0.032431	UVRAG-201	UV radiation resistance-associated gene protein isoform X2 [Sus scrofa]	XP_020918186.1
Chr09_132961125_133032137	Pig.10255	18.0852	4.17674	0.00646794	0.0408029	yes	up	0	0	0	0.053119	0.0245815	0.0441892	0	0.0406299	UVRAG-201	UV radiation resistance-associated gene protein isoform X2 [Sus scrofa]	XP_020918186.1
Chr09_133753630_133848763	Pig.10246	74.6379	6.22184	0.000518069	0.00597938	yes	up	0	0	0	0.115091	0.237621	0.167919	0	0.173544	ACER3-201	alkaline ceramidase 3 isoform X1 [Sus scrofa]	XP_020918213.1
Chr09_134961058_134964794	Pig.10235	28.6609	4.84101	0.00655114	0.0411396	yes	up	0	0	0	0.0796785	0.0327753	0.0795406	0	0.0639981	RSF1-201	remodeling and spacing factor 1 [Sus scrofa]	ACJ53937.1
Chr09_140258015_140346066	MSTRG.25913,Pig.18880	18.8472	4.23627	0.0294254	1	yes	up	0	0	0	0.0354127	0.0409691	0.053027	0	0.0431363	#N/A	#N/A	#N/A
Chr09_16536395_16537017	Pig.04694	3.89315	1.96094	0.0200384	0.0966977	yes	up	0.0125828	0	0.018584	0.0442659	0.0983259	0.0972162	0.0103889	0.079936	CEP350	LOW QUALITY PROTEIN: centrosome-associated protein 350 [Sus scrofa]	XP_020919409.1
Chr09_18435140_18439998	Pig.04675	0.0385571	-4.69686	0.0211981	1	yes	down	0.0251656	0.0230042	0.018584	0	0	0	0.0222512	0	SEC16B-202	protein transport protein Sec16B isoform X1 [Sus scrofa]	XP_020919350.1
Chr09_20162542_20206602	Pig.04669	12.8745	3.68645	0.0220291	0.102634	yes	up	0	0	0	0.0442659	0.0245815	0.0176757	0	0.028841	COP1-203	E3 ubiquitin-protein ligase RFWD2 isoform X1 [Sus scrofa]	XP_020919333.1
Chr09_23271876_23286452	Pig.04645	0.362372	-1.46446	0.00238657	0.018742	yes	down	0.446689	0.199369	0.260176	0.177063	0.17207	0.256297	0.302078	0.20181	SUCO-201	LOW QUALITY PROTEIN: SUN domain-containing ossification factor [Sus scrofa]	XP_003357586.3
Chr09_2529470_2539616	Pig.14419	0.0217534	-5.52262	0.00096992	0.00985116	yes	down	0.0188742	0.0613444	0.037168	0	0	0	0.0391289	0	COBL	LOW QUALITY PROTEIN: protein cordon-bleu [Sus scrofa]	XP_020919590.1
Chr09_33373916_33420108	Pig.00297	0.354818	-1.49485	0.0307989	0.127679	yes	down	0.0629139	0.138025	0.105309	0.0708254	0.0327753	0.0972162	0.102083	0.066939	SRPK2-201	SRSF protein kinase 2 isoform X2 [Sus scrofa]	XP_020958237.1
Chr09_38770634_38831263		0.0187752	-5.73503	0.0268376	0.1155	yes	down	2.74305	1.57195	2.09999	0.159357	0.049163	0	2.13833	0.0695067	#N/A	#N/A	#N/A
Chr09_40198606_40202893	Pig.00327	0.0380261	-4.71687	0.00253819	0.019531	yes	down	0.0251656	0.0306722	0.0123893	0	0	0	0.0227424	0	CACNA2D1-201	voltage-dependent calcium channel subunit alpha-2/delta-1 isoform X5 [Sus scrofa]	XP_013835239.1
Chr09_45493560_45496209	Pig.00341	0.00718967	-7.11986	1.17228e-07	6.26656e-06	yes	down	0.100662	0.138025	0.117699	0	0	0	0.118795	0	ABCB1	LOW QUALITY PROTEIN: multidrug resistance protein 1-like [Sus scrofa]	XP_020919622.1
Chr09_47585747_47596458	Pig.00356	0.0169465	-5.88287	0.000215492	0.00297106	yes	down	0.0440398	0.0383403	0.0681414	0	0	0	0.0501738	0	RAPGEF5-202	rap guanine nucleotide exchange factor 5 isoform X1 [Sus scrofa]	XP_013845029.1
Chr09_49973631_49975568		8.01184	3.00213	0.00552171	0.0361044	yes	up	0.0125828	0.0153361	0	0.0708254	0.122907	0.212108	0.0093063	0.13528	#N/A	#N/A	#N/A
Chr09_53957225_53971274	Pig.00384	0.0594238	-4.07282	0.0448671	1	yes	down	0	0.0306722	0.0123893	0	0	0	0.0143538	0	AGMO-201	alkylglycerol monooxygenase isoform X1 [Sus scrofa]	XP_003130227.3
Chr09_53971179_54037551	Pig.00384	0.0255524	-5.2904	0.00172892	1	yes	down	0.0377484	0.0383403	0.0247787	0	0	0	0.0336224	0	AGMO-201	alkylglycerol monooxygenase isoform X1 [Sus scrofa]	XP_003130227.3
Chr09_54009268_54037551	Pig.00384	0.0273602	-5.19178	0.00555288	0.0362305	yes	down	0.0188742	0.0306722	0.0433627	0	0	0	0.0309697	0	AGMO-201	alkylglycerol monooxygenase isoform X1 [Sus scrofa]	XP_003130227.3
Chr09_71065077_71065262		0.0307546	-5.02305	0.0350224	1	yes	down	0.0251656	0.0460083	0.0123893	0	0	0	0.0278544	0	#N/A	#N/A	#N/A
Chr09_72304964_72307252	Pig.00490	6.64556	2.73239	0.0120892	0.0651961	yes	up	0	0.0230042	0.0123893	0.0796785	0.254009	0.106054	0.0117978	0.14658	NUCKS1-203	nuclear ubiquitous casein and cyclin-dependent kinase substrate 1 [Sus scrofa]	BAC37408.1
Chr09_73629528_73630300	Pig.00508	29.7827	4.8964	0.000242643	0.00325697	yes	up	0	0	0	0.0265595	0.0655506	0.114892	0	0.0690007	PIK3C2B-201	phosphatidylinositol 4-phosphate 3-kinase C2 domain-containing subunit beta isoform X1 [Sus scrofa]	XP_003357437.4
Chr09_8107518_8113176	Pig.14368	0.0102539	-6.60768	8.03562e-07	3.22165e-05	yes	down	0.0943709	0.0690125	0.0867254	0	0	0	0.0833696	0	LPGAT1-201	acyl-CoA:lysophosphatidylglycerol acyltransferase 1 [Sus scrofa]	XP_003357646.2
Chr09_8107518_8117610	Pig.14368	0.174431	-2.51927	1.02569e-11	1.15751e-09	yes	down	0.792716	0.720797	0.774334	0.159357	0.188458	0.397703	0.762615	0.248506	LPGAT1-201	acyl-CoA:lysophosphatidylglycerol acyltransferase 1 [Sus scrofa]	XP_003357646.2
Chr09_90951665_90967965		0.108131	-3.20915	2.59096e-07	1.25312e-05	yes	down	0.515894	0.168697	0.303539	0.0619722	0.0819383	0.053027	0.329377	0.0656458	#N/A	#N/A	#N/A
Chr09_92664524_92666467	MSTRG.25007,Pig.06854	2.28033	1.18924	0.00116685	0.0109061	yes	up	0.0754967	0.115021	0.117699	0.336421	0.516211	0.459568	0.102739	0.4374	#N/A	#N/A	#N/A
Chr10_12010782_12017302	Pig.12142	0.075714	-3.7233	0.00443392	0.0305137	yes	down	0.0692053	0.0230042	0.0309733	0	0	0.0176757	0.0410609	0.00589189	NR5A2-201	nuclear receptor subfamily 5 group A member 2 isoform X1 [Sus scrofa]	XP_020919660.1
Chr10_12165178_12166260		0.0320742	-4.96244	0.0479838	0.176152	yes	down	0.0377484	0.0306722	0.0123893	0	0	0	0.0269366	0	#N/A	#N/A	#N/A
Chr10_14002831_14014140	Pig.12117	19.01	4.24868	0.037107	1	yes	up	0	0	0	0.0354127	0.0327753	0.0618649	0	0.043351	KDM5B-201	lysine-specific demethylase 5B [Sus scrofa]	XP_020920226.1
Chr10_15305573_15357043		0.203845	-2.29446	0.010442	0.0579539	yes	down	0.0692053	0.0383403	0.0433627	0	0.0573568	0	0.0503028	0.0191189	#N/A	#N/A	#N/A
Chr10_16177546_16182624	Pig.10842,MSTRG.26263	0.0453731	-4.46202	0.0222047	1	yes	down	0.0251656	0	0.0309733	0	0	0	0.018713	0	#N/A	#N/A	#N/A
Chr10_17210237_17246070	Pig.10851,MSTRG.26305	2.24805	1.16867	0.0293752	0.122948	yes	up	0.0251656	0.0843486	0.037168	0.0973849	0.245815	0.265135	0.048894	0.202778	#N/A	#N/A	#N/A
Chr10_20827319_20840251	Pig.11166	0.016809	-5.89463	0.000386276	0.0046521	yes	down	0.0440398	0.0460083	0.0619467	0	0	0	0.0506649	0	MARC1	mitochondrial amidoxime-reducing component 1 isoform X1 [Sus scrofa]	XP_020919996.1
Chr10_20961970_20996575	Pig.11163	35.3016	5.14166	0.0083251	0.0488758	yes	up	0	0	0	0.0177063	0.0901321	0.141405	0	0.0830813	MARK1-201	serine/threonine-protein kinase MARK1 isoform X1 [Sus scrofa]	XP_020919987.1
Chr10_20969083_20996575	Pig.11163	62.424	5.96403	1.44609e-05	0.000349701	yes	up	0	0	0	0.106238	0.147489	0.176757	0	0.143495	MARK1-201	serine/threonine-protein kinase MARK1 isoform X1 [Sus scrofa]	XP_020919987.1
Chr10_22670141_22673756	Pig.11154	59.4794	5.89432	9.21339e-06	0.00024201	yes	up	0	0	0	0.0796785	0.221233	0.114892	0	0.138601	TGFB2-201	transforming growth factor beta-2 isoform X1 [Sus scrofa]	XP_020919953.1
Chr10_33762189_33772386	Pig.17816	0.0179949	-5.79627	2.99331e-05	0.000620449	yes	down	0.0251656	0.0613444	0.055752	0	0	0	0.0474207	0	CFH	complement factor H precursor [Sus scrofa]	NP_999446.1
Chr10_33762189_33787163	Pig.17816	0.0268911	-5.21672	0.00632651	1	yes	down	0.0125828	0.0383403	0.0433627	0	0	0	0.0314286	0	CFH	complement factor H precursor [Sus scrofa]	NP_999446.1
Chr10_33794237_33815106	MSTRG.26482,Pig.17816	0.0497694	-4.3286	0.00579493	0.0372514	yes	down	0.031457	0.0766805	0.0867254	0.0177063	0	0	0.0649543	0.00590211	#N/A	#N/A	#N/A
Chr10_34281541_34315347		0.319514	-1.64605	7.46321e-12	8.74631e-10	yes	down	1.06954	0.881826	1.05309	0.637428	0.581762	0.556784	1.00149	0.591991	#N/A	#N/A	#N/A
Chr10_37919194_37950701		1.1935e-06	-19.6764	0.00603073	0.0383625	yes	down	0	0	0.681414	0	0	0	0.227138	0	#N/A	#N/A	#N/A
Chr10_39752709_39765278		0.0258676	-5.27271	1.73841e-12	2.4077e-10	yes	down	0.339735	0.345062	0.216813	0.0265595	0.0163877	0	0.300537	0.0143157	#N/A	#N/A	#N/A
Chr10_44021920_44023990	Pig.20499	0.0217654	-5.52182	0.000735385	0.00780738	yes	down	0.0251656	0.0230042	0.0681414	0	0	0	0.0387704	0	DHTKD1-201	probable 2-oxoglutarate dehydrogenase E1 component DHKTD1, mitochondrial isoform X1 [Sus scrofa]	XP_020920651.1
Chr10_44106330_44112944	Pig.20502,MSTRG.26646	0.268477	-1.89713	0.0456953	0.170421	yes	down	0.0377484	0.0306722	0.037168	0.0177063	0	0.0353514	0.0351962	0.0176859	#N/A	#N/A	#N/A
Chr10_46687555_46689935	Pig.09685	0.213179	-2.22986	0.000190588	0.00275056	yes	down	0.176159	0.130357	0.09292	0.0619722	0.0327753	0.0618649	0.133145	0.0522041	PARD3-201	LOW QUALITY PROTEIN: partitioning defective 3 homolog [Sus scrofa]	XP_020919890.1
Chr10_46687555_46712915	Pig.09685	0.132999	-2.91051	0.0102963	0.0574174	yes	down	0.031457	0.0690125	0.0619467	0	0.0409691	0	0.0541387	0.0136564	PARD3-201	LOW QUALITY PROTEIN: partitioning defective 3 homolog [Sus scrofa]	XP_020919890.1
Chr10_46803012_46813745	Pig.09685	0.317412	-1.65557	0.00104333	0.0102381	yes	down	0.150993	0.161029	0.123893	0.123944	0.0409691	0.0883784	0.145305	0.0844306	PARD3-201	LOW QUALITY PROTEIN: partitioning defective 3 homolog [Sus scrofa]	XP_020919890.1
Chr10_53361043_53363531	Pig.16905	15.7352	3.97593	0.0240096	0.108061	yes	up	0	0	0	0.0708254	0.0327753	0	0	0.0345336	ARHGAP21-201	LOW QUALITY PROTEIN: rho GTPase-activating protein 21 [Sus scrofa]	XP_020920575.1
Chr10_55203503_55208964	Pig.16891	0.32525	-1.62038	0.0115483	0.0628352	yes	down	0.125828	0.0460083	0.142477	0.0177063	0.10652	0.0707027	0.104771	0.0649763	ACBD5-201	acyl-CoA-binding domain-containing protein 5 isoform X4 [Sus scrofa]	XP_020920544.1
Chr10_56001317_56001808		37.3804	5.22421	0.00135754	0.0124217	yes	up	0	0	0	0.0796785	0.0409691	0.132568	0	0.0844051	#N/A	#N/A	#N/A
Chr10_57501680_57515799	Pig.13792,MSTRG.26836	0.0885402	-3.49752	0.0048718	0.0327691	yes	down	0.0566225	0.0306722	0.0619467	0	0.0245815	0	0.0497471	0.00819383	#N/A	#N/A	#N/A
Chr10_61841725_61864145	Pig.05022	4.22776	2.07989	2.8234e-07	1.31611e-05	yes	up	0.106954	0.107353	0.074336	0.416099	0.77022	1.09589	0.0962141	0.760737	ARHGAP12-201	rho GTPase-activating protein 12 isoform X5 [Sus scrofa]	XP_013835673.1
Chr10_61852304_61864145	Pig.05022	57.7777	5.85244	0.00114701	0.0107869	yes	up	0	0	0	0.053119	0.139295	0.212108	0	0.134841	ARHGAP12-201	rho GTPase-activating protein 12 isoform X5 [Sus scrofa]	XP_013835673.1
Chr10_62251864_62269591	Pig.05023	0.120789	-3.04944	0.0174965	0.0869688	yes	down	0.0503312	0.0613444	0	0	0.0245815	0	0.0372252	0.00819383	ZEB1-201	LOW QUALITY PROTEIN: zinc finger E-box-binding homeobox 1 [Sus scrofa]	XP_020919855.1
Chr10_70809293_70891947		16.4822	4.04284	0.0384193	0.150467	yes	up	0	0	0	0.0265595	0.0901321	0	0	0.0388972	#N/A	#N/A	#N/A
Chr10_71425687_71427450	MSTRG.27019	37.3884	5.22452	0.000806096	0.00846956	yes	up	0	0	0	0.0619722	0.0901321	0.106054	0	0.0860528	0	0	NP_001106909.1
Chr10_71634365_71645283	MSTRG.27025,Pig.05070	11.8751	3.56986	0.0185035	0.0907892	yes	up	0	0	0	0	0.0573568	0.0265135	0	0.0279568	#N/A	#N/A	#N/A
Chr10_71673526_71700050	MSTRG.27025	3.26374	1.70653	8.42245e-05	0.00141007	yes	up	0.100662	0.0306722	0.0867254	0.593162	0.335947	0.388865	0.0726866	0.439325	0	0	XP_020920352.1
Chr10_71675815_71683181	MSTRG.27025,Pig.05070	37.675	5.23553	0.00108889	0.0104995	yes	up	0	0	0	0.0885317	0.0983259	0.0707027	0	0.0858535	#N/A	#N/A	#N/A
Chr10_73336844_73340619		0.0391646	-4.67431	0.0456701	1	yes	down	0	0.0460083	0.018584	0	0	0	0.0215308	0	#N/A	#N/A	#N/A
Chr10_75688817_75690713	Pig.09939	17.82	4.15542	0.00243161	0.0189491	yes	up	0	0	0	0.0619722	0.0409691	0.0176757	0	0.0402057	NAA35	PREDICTED: N-alpha-acetyltransferase 35, NatC auxiliary subunit isoform X1 [Miniopterus natalensis]	XP_016078359.1
Chr10_75879157_75880339	MSTRG.27145,Pig.09943	0.174688	-2.51715	1.00792e-12	1.61639e-10	yes	down	0.987749	0.651784	0.854864	0.354127	0.21304	0.229784	0.831466	0.26565	#N/A	#N/A	#N/A
Chr10_75882344_75889215	MSTRG.27145,Pig.09943	0.0398791	-4.64823	0.0065789	0.0411396	yes	down	0.113245	0.0690125	0.0681414	0.0177063	0	0	0.0834663	0.00590211	#N/A	#N/A	#N/A
Chr10_79750648_79751650	Pig.09964,MSTRG.27211	0.166935	-2.58264	0.000100336	0.00160908	yes	down	0.0692053	0.130357	0.055752	0.0354127	0.0163877	0.0265135	0.0851047	0.0261046	#N/A	#N/A	#N/A
Chr10_9659996_9696380	Pig.12150	0.155968	-2.68068	0.0185541	0.0908911	yes	down	0.0188742	0.0230042	0.0433627	0	0.0245815	0	0.0284137	0.00819383	DENND1B-201	LOW QUALITY PROTEIN: DENN domain-containing protein 1B [Sus scrofa]	XP_020920142.1
Chr10_9673831_9696380	Pig.12150	0.498499	-1.00434	0.0259306	0.113034	yes	down	0.0566225	0.0996847	0.161061	0.0708254	0.147489	0.0795406	0.10579	0.0992849	DENND1B-201	LOW QUALITY PROTEIN: DENN domain-containing protein 1B [Sus scrofa]	XP_020920142.1
Chr11_1141966_1143058	Pig.20214	11.7065	3.54924	0.0275871	0.117728	yes	up	0.0125828	0	0	0.132798	0.122907	0.0176757	0.00419426	0.0911269	Col4a1	collagen alpha-1(IV) chain [Castor canadensis]	XP_020921569.1
Chr11_12201402_12205677	Pig.03511	2.18526	1.12781	7.32999e-06	0.000204903	yes	up	0.434106	0.529095	0.507963	1.58472	2.04846	2.36854	0.490388	2.00057	PAN3-201	PAB-dependent poly(A)-specific ribonuclease subunit PAN3 isoform X1 [Sus scrofa]	XP_005668351.1
Chr11_12201402_12222536	Pig.03511	2.1522	1.10582	0.0134863	0.0713416	yes	up	0.0692053	0.0766805	0.0681414	0.212476	0.245815	0.397703	0.0713424	0.285331	PAN3-201	PAB-dependent poly(A)-specific ribonuclease subunit PAN3 isoform X1 [Sus scrofa]	XP_005668351.1
Chr11_12201402_12245406	Pig.03511	2.42224	1.27634	0.0072887	0.0441524	yes	up	0.0817881	0.0460083	0.0495574	0.203623	0.245815	0.353514	0.0591179	0.26765	PAN3-201	PAB-dependent poly(A)-specific ribonuclease subunit PAN3 isoform X1 [Sus scrofa]	XP_005668351.1
Chr11_12275090_12278556	Pig.03511	3.91437	1.96878	0.0319985	0.131756	yes	up	0.0251656	0.0153361	0.0123893	0.16821	0.139295	0.0707027	0.0176303	0.126069	PAN3-201	PAB-dependent poly(A)-specific ribonuclease subunit PAN3 isoform X1 [Sus scrofa]	XP_005668351.1
Chr11_12275090_12291797	Pig.03511	16.577	4.05111	0.0160692	0.0813335	yes	up	0	0	0	0.0177063	0.0819383	0.0176757	0	0.0391068	PAN3-201	PAB-dependent poly(A)-specific ribonuclease subunit PAN3 isoform X1 [Sus scrofa]	XP_005668351.1
Chr11_12275090_12300096	Pig.03511	38.6479	5.27232	0.000110259	0.00170538	yes	up	0	0	0	0.0885317	0.114714	0.0618649	0	0.0883701	PAN3-201	PAB-dependent poly(A)-specific ribonuclease subunit PAN3 isoform X1 [Sus scrofa]	XP_005668351.1
Chr11_12285086_12300096	Pig.03511	19.8637	4.31206	0.00918218	0.0526895	yes	up	0	0	0	0.053119	0	0.0795406	0	0.0442199	PAN3-201	PAB-dependent poly(A)-specific ribonuclease subunit PAN3 isoform X1 [Sus scrofa]	XP_005668351.1
Chr11_12464386_12465127	Pig.03510	9.13077	3.19074	0.00182822	0.015517	yes	up	0.0188742	0	0	0.150504	0.10652	0.0707027	0.00629139	0.109242	FLT1-201	vascular endothelial growth factor receptor 1 isoform X2 [Sus scrofa]	XP_001925775.5
Chr11_15621464_15623081	Pig.03488	14.8984	3.89709	0.0146932	0.0766614	yes	up	0	0	0	0.0354127	0.049163	0.0176757	0	0.0340838	N4BP2L2	LOW QUALITY PROTEIN: NEDD4-binding protein 2-like 2 [Sus scrofa]	XP_020920838.1
Chr11_22877583_22899081	Pig.03441,MSTRG.27747	0.270466	-1.88648	0.0103076	0.0574174	yes	down	0.0566225	0.0383403	0.0867254	0.0265595	0.0655506	0	0.0605627	0.0307034	#N/A	#N/A	#N/A
Chr11_24526251_24546982		9.16027	3.19539	0.0246396	0.109762	yes	up	0	0	0.0123893	0.132798	0.0655506	0.0176757	0.00412978	0.072008	#N/A	#N/A	#N/A
Chr11_25123977_25135223		0.298161	-1.74584	0.0149918	0.0780853	yes	down	0.0692053	0.0920166	0.0433627	0.0354127	0.0327753	0.0441892	0.0681949	0.0374591	#N/A	#N/A	#N/A
Chr11_25978081_25982836	Pig.16494	3.29951	1.72225	0.0313886	0.12942	yes	up	0.0251656	0.0383403	0	0.0796785	0.131101	0.167919	0.0211686	0.126233	RB1-201	retinoblastoma-associated protein [Sus scrofa]	NP_001272896.1
Chr11_28120886_28152319	Pig.07328	0.0168456	-5.89148	0.000318603	0.0040326	yes	down	0.0503312	0.0460083	0.055752	0	0	0	0.0506972	0	EPSTI1-201	epithelial-stromal interaction protein 1 isoform X1 [Sus scrofa]	XP_003482944.1
Chr11_29551699_29552532	Pig.07336	0.0419845	-4.574	0.0449537	1	yes	down	0.031457	0.0306722	0	0	0	0	0.0207097	0	NAA16	N-alpha-acetyltransferase 16, NatA auxiliary subunit isoform X1 [Sus scrofa]	XP_020921285.1
Chr11_29573414_29594388	Pig.07336	19.8261	4.30933	0.0151921	0.0787253	yes	up	0	0	0	0.0177063	0.0409691	0.0795406	0	0.046072	NAA16	N-alpha-acetyltransferase 16, NatA auxiliary subunit isoform X1 [Sus scrofa]	XP_020921285.1
Chr11_34579623_34579988	Pig.07349	31.4864	4.97666	0.00776407	0.0466098	yes	up	0	0	0	0.0442659	0.114714	0.0618649	0	0.0736148	PCDH17-201	protocadherin-17 isoform X1 [Sus scrofa]	XP_020921306.1
Chr11_4429771_4437719	Pig.03585	0.0355239	-4.81507	0.000899937	0.00927039	yes	down	0.031457	0.122689	0.09292	0	0.0163877	0	0.0823553	0.00546255	FAH-201	fumarylacetoacetase [Sus scrofa]	XP_003356696.1
Chr11_4445554_4455476	Pig.03585	0.151168	-2.72577	0.00401258	0.0282363	yes	down	0.0692053	0.0536764	0.09292	0.0354127	0.0245815	0	0.0719339	0.0199981	FAH-201	fumarylacetoacetase [Sus scrofa]	XP_003356696.1
Chr11_4486703_4489369		0.0941416	-3.40902	0.0117698	0.0638123	yes	down	0.0251656	0.0460083	0.0247787	0	0.0163877	0	0.0319842	0.00546255	#N/A	#N/A	#N/A
Chr11_4643518_4687351		0.407964	-1.29349	0.0262893	0.11427	yes	down	0.0377484	0.0536764	0.142477	0.0265595	0.0409691	0.114892	0.0779674	0.0608069	#N/A	#N/A	#N/A
Chr11_52488289_52496184	MSTRG.27964,Pig.04496	0.0782998	-3.67485	0.0156936	0.0803669	yes	down	0	0	0.0309733	0	0	0	0.0103244	0	#N/A	#N/A	#N/A
Chr11_56028794_56037997	Pig.04511	0.181995	-2.45803	3.57175e-07	1.60046e-05	yes	down	0.446689	0.467751	0.526547	0.16821	0.204846	0.114892	0.480329	0.162649	NDFIP2-202	NEDD4 family-interacting protein 2 [Sus scrofa]	XP_001926612.1
Chr11_56028794_56044515	Pig.04511	0.240809	-2.05404	0.0229032	0.104898	yes	down	0.0251656	0.0460083	0.055752	0	0.0573568	0	0.0423086	0.0191189	NDFIP2-202	NEDD4 family-interacting protein 2 [Sus scrofa]	XP_001926612.1
Chr11_56028794_56048891	Pig.04511	0.169705	-2.5589	0.00030086	0.00386802	yes	down	0.0817881	0.0843486	0.130088	0.0177063	0.0327753	0.0441892	0.0987416	0.031557	NDFIP2-202	NEDD4 family-interacting protein 2 [Sus scrofa]	XP_001926612.1
Chr11_56028794_56052028		0.0655321	-3.93166	0.00100818	0.0100389	yes	down	0.031457	0.0766805	0.09292	0	0.0245815	0	0.0670192	0.00819383	#N/A	#N/A	#N/A
Chr11_56037904_56048891	Pig.04511	0.108874	-3.19927	0.0281666	0.119199	yes	down	0.0377484	0.0536764	0.037168	0	0	0.0265135	0.0428642	0.00883784	NDFIP2-202	NEDD4 family-interacting protein 2 [Sus scrofa]	XP_001926612.1
Chr11_7001257_7015265	Pig.03552	0.0340664	-4.87551	0.00481597	0.0325371	yes	down	0.0377484	0	0.037168	0	0	0	0.0249721	0	PARP4-202	poly [ADP-ribose]	XP_020921664.1
Chr11_7153139_7181961	Pig.03550	4.14994	2.05309	0.0435199	0.164522	yes	up	0.0125828	0.0230042	0	0.0973849	0.139295	0.0265135	0.0118623	0.0877312	PSPC1-201	paraspeckle component 1 isoform X2 [Sus scrofa]	XP_020921078.1
Chr11_73469919_73470694		3.78694	1.92103	0.000286971	0.00372085	yes	up	0.0566225	0.0460083	0.018584	0.265595	0.237621	0.335838	0.040405	0.279685	#N/A	#N/A	#N/A
Chr11_76033061_76067275	Pig.07939	0.0790356	-3.66135	0.0362722	1	yes	down	0	0	0.0309733	0	0	0	0.0103244	0	PCCA-204	propionyl-CoA carboxylase alpha chain, mitochondrial isoform X1 [Sus scrofa]	XP_020921525.1
Chr11_76729156_76730764	Pig.07943	56.7244	5.8259	0.00294495	0.0221017	yes	up	0	0	0	0.141651	0.0245815	0.212108	0	0.126113	NALCN	sodium leak channel non-selective protein isoform X1 [Sus scrofa]	XP_020921537.1
Chr11_7762796_7763348	Pig.03542	0.481409	-1.05467	0.0365879	0.144783	yes	down	0.232782	0.153361	0.247787	0.212476	0.229427	0.12373	0.21131	0.188544	XPO4-202	exportin-4 isoform X1 [Sus scrofa]	XP_020921096.1
Chr11_82932722_82981452	Pig.07964	0.0122173	-6.35493	0.000825817	0.00861735	yes	down	0.0692053	0.0536764	0.0867254	0	0	0	0.069869	0	MYO16	LOW QUALITY PROTEIN: unconventional myosin-XVI [Sus scrofa]	XP_020921564.1
Chr11_82963694_82981452	Pig.07964	0.0485893	-4.36322	0.0389736	1	yes	down	0.0188742	0.0153361	0.018584	0	0	0	0.0175981	0	MYO16	LOW QUALITY PROTEIN: unconventional myosin-XVI [Sus scrofa]	XP_020921564.1
Chr11_9883781_9888954	Pig.03530	19.7223	4.30176	0.00908404	0.0522247	yes	up	0	0	0	0.0442659	0	0.0883784	0	0.0442148	NUP58-201	PREDICTED: nucleoporin p58/p45, partial [Vicugna pacos]	XP_023105795.1
Chr12_11806957_11891592	MSTRG.28723	0.119812	-3.06116	0.000550578	0.00621337	yes	down	0.0692053	0.0306722	0.737166	0.0796785	0.0737444	0.0353514	0.279014	0.0629248	0	0	XP_020921875.1
Chr12_11821203_11856846	MSTRG.28723	8.21876e-05	-13.5707	0.0312513	0.129203	yes	down	0	0	0.018584	0	0	0	0.00619467	0	0	0	XP_020921875.1
Chr12_11829870_11864136	MSTRG.28723	0.0191748	-5.70465	0.0344736	0.138577	yes	down	0	0	0.130088	0	0	0	0.0433627	0	0	0	XP_020921875.1
Chr12_11843480_11891592	MSTRG.28723	0.0481115	-4.37747	0.0391522	0.152749	yes	down	0.0188742	0	0.359291	0.0177063	0.0163877	0	0.126055	0.0113647	0	0	XP_020921875.1
Chr12_18397123_18397927	Pig.19653	6.38145	2.67388	0.027979	0.118736	yes	up	0.0125828	0	0	0.0619722	0.0573568	0.0353514	0.00419426	0.0515601	METTL16-201	methyltransferase-like protein 16 isoform X4 [Sus scrofa]	XP_020923280.1
Chr12_20596715_20609451	MSTRG.29174	21.848	4.44943	0.0224797	0.103781	yes	up	0	0	0	0.0885317	0	0.053027	0	0.0471863	0	0	TKS34218.1
Chr12_21184224_21202762	Pig.11854	33.1038	5.04892	0.00220556	0.0175581	yes	up	0	0	0	0.0619722	0.049163	0.114892	0	0.0753424	TAOK1-202	PREDICTED: serine/threonine-protein kinase TAO1 [Camelus ferus]	NP_001193029.1
Chr12_24083408_24096439	Pig.11798	0.364144	-1.45742	0.0340602	0.137232	yes	down	0.0629139	0.0536764	0.0991147	0	0.10652	0.0441892	0.0719017	0.0502363	RHOT1-201	PREDICTED: mitochondrial Rho GTPase 1, partial [Manis javanica]	XP_003797228.1
Chr12_24249907_24256251	Pig.11795	0.429172	-1.22037	0.0392805	0.152858	yes	down	0.0692053	0.0690125	0.0805307	0.0442659	0.131101	0	0.0729162	0.0584557	ZNF207-205	PREDICTED: BUB3-interacting and GLEBS motif-containing protein ZNF207 isoform X3 [Ovis aries]	XP_020923110.1
Chr12_27226046_27254638		0.0302729	-5.04583	0.00980752	0.0550341	yes	down	0.0440398	0.0230042	0.018584	0	0	0	0.0285426	0	#N/A	#N/A	#N/A
Chr12_27312206_27315092	MSTRG.29412	138449	17.079	0.000345568	0.00428027	yes	up	0	0	0	0	0.049163	0.053027	0	0.0340633	0	0	XP_020923050.1
Chr12_27312206_27348924	MSTRG.29412,Pig.11225	0.0733694	-3.76868	0.00344828	0.0252355	yes	down	0.18245	0.107353	0.037168	0.0265595	0.0163877	0	0.10899	0.0143157	#N/A	#N/A	#N/A
Chr12_27337142_27348924	MSTRG.29412	14.035	3.81096	0.0110004	0.0601765	yes	up	0.0188742	0.0460083	0.037168	0.991555	0.598149	1.04287	0.0340168	0.877523	0	0	XP_020923050.1
Chr12_27759712_27773665	Pig.11220,MSTRG.29425	5.77008	2.52859	0.0202164	0.0970071	yes	up	0	0	0.018584	0.0973849	0.049163	0.0618649	0.00619467	0.0694709	#N/A	#N/A	#N/A
Chr12_27998262_28002402	Pig.11217	3.40085	1.76589	0.00476077	0.0322357	yes	up	0.0251656	0.0306722	0.0309733	0.221329	0.188458	0.132568	0.028937	0.180785	ACACA-203	acetyl-CoA carboxylase 1 isoform X1 [Sus scrofa]	XP_020921886.1
Chr12_28048634_28069283	Pig.11217	31.0435	4.95622	0.0168188	1	yes	up	0	0	0	0.0354127	0.0655506	0.114892	0	0.0719517	ACACA-203	acetyl-CoA carboxylase 1 isoform X1 [Sus scrofa]	XP_020921886.1
Chr12_28082367_28086865	Pig.11217	6.81801	2.76935	8.01433e-08	4.43994e-06	yes	up	0.0692053	0.0153361	0.0433627	0.495778	0.598149	0.556784	0.0426347	0.550237	ACACA-203	acetyl-CoA carboxylase 1 isoform X1 [Sus scrofa]	XP_020921886.1
Chr12_29282478_29290092	Pig.11201	0.115356	-3.11583	0.0484901	0.17737	yes	down	0.0188742	0	0.055752	0	0.0163877	0	0.0248754	0.00546255	PPM1D-201	protein phosphatase 1D [Sus scrofa]	XP_005669070.3
Chr12_30652472_30656518	Pig.11189	38.2084	5.25582	0.000508069	0.00588626	yes	up	0	0	0	0.053119	0.10652	0.106054	0	0.0885643	RPS6KB1-203	ribosomal protein S6 kinase beta-1 isoform X1 [Sus scrofa]	XP_003131719.1
Chr12_30680004_30683029	Pig.11189	8.33016	3.05834	0.0111951	0.0611315	yes	up	0.0125828	0	0	0.053119	0.0983259	0.053027	0.00419426	0.0681573	RPS6KB1-203	ribosomal protein S6 kinase beta-1 isoform X1 [Sus scrofa]	XP_003131719.1
Chr12_30807267_30853831		0.0346128	-4.85255	0.00575817	1	yes	down	0.0251656	0.0306722	0.018584	0	0	0	0.0248073	0	#N/A	#N/A	#N/A
Chr12_30845859_30853831		0.047592	-4.39314	0.000589135	0.00652762	yes	down	0.0629139	0.0690125	0.0681414	0.0177063	0	0	0.0666893	0.00590211	#N/A	#N/A	#N/A
Chr12_31796253_31823882	Pig.11176	3.34287	1.74109	0.000117013	0.00177383	yes	up	0.0377484	0.0613444	0.0433627	0.212476	0.303172	0.362351	0.0474852	0.292666	RAD51C-201	DNA repair protein RAD51 homolog 3 isoform X1 [Sus scrofa]	XP_020922938.1
Chr12_3474168_3478097	Pig.19814	0.431906	-1.21121	0.0154401	0.079604	yes	down	0.0754967	0.0920166	0.136283	0.0354127	0.10652	0.106054	0.101265	0.0826622	EIF4A3-201	eukaryotic initiation factor 4A-III [Bos taurus]	NP_001039653.1
Chr12_35602425_35606295	MSTRG.29616,Pig.13391	0.041833	-4.57921	0.005017	0.0334312	yes	down	0.0188742	0.0306722	0.0123893	0	0	0	0.0206452	0	#N/A	#N/A	#N/A
Chr12_47059189_47062026		15.7195	3.97448	0.000255081	0.00336464	yes	up	0	0.0230042	0	0.247889	0.221233	0.132568	0.00766805	0.200563	#N/A	#N/A	#N/A
Chr12_48467152_48485307		0.00525595	-7.57183	0.00379914	0.02711	yes	down	0	0.222373	0.253981	0	0	0	0.158785	0	#N/A	#N/A	#N/A
Chr12_48468550_48486979		42.9589	5.42488	0.0013871	0.0126541	yes	up	0	0	0	0.053119	0.0573568	0.185595	0	0.0986902	#N/A	#N/A	#N/A
Chr12_48474181_48487671		280415	18.0972	0.0116666	0.0633654	yes	up	0	0	0	0.0973849	0	0	0	0.0324616	#N/A	#N/A	#N/A
Chr12_48641949_48684250		0.00930063	-6.74846	2.53666e-05	0.000540504	yes	down	0	0.115021	0.154867	0	0	0	0.0899625	0	#N/A	#N/A	#N/A
Chr12_55637737_55645324	Pig.08039	0.0312819	-4.99853	0.0163759	1	yes	down	0	0.0306722	0.0495574	0	0	0	0.0267432	0	ARSG-201	arylsulfatase G isoform X1 [Sus scrofa]	XP_013845359.1
Chr12_56004263_56093033		0.00293817	-8.41087	3.65479e-06	0.000111361	yes	down	0.276821	0.291386	0.303539	0	0	0	0.290582	0	#N/A	#N/A	#N/A
Chr12_56174732_56189774	Pig.08031	0.385775	-1.37417	0.00072256	0.00769804	yes	down	0.295696	0.214705	0.328317	0.292155	0.122907	0.176757	0.279573	0.197273	ABCA6-203	ATP-binding cassette sub-family A member 6 isoform X1 [Sus scrofa]	XP_020923739.1
Chr12_59749983_59760318		0.0678506	-3.88149	0.0478946	0.176097	yes	down	0.0188742	0	0.018584	0	0	0	0.0124861	0	#N/A	#N/A	#N/A
Chr12_6014140_6032724		0.121984	-3.03524	0.0275307	0.117652	yes	down	0.0125828	0.0230042	0.037168	0	0.0163877	0	0.0242517	0.00546255	#N/A	#N/A	#N/A
Chr12_6014140_6037875		0.412907	-1.27611	0.00865773	0.0505366	yes	down	0.125828	0.115021	0.154867	0.053119	0.131101	0.12373	0.131905	0.10265	#N/A	#N/A	#N/A
Chr13_101290645_101300295	Pig.06518	0.0946716	-3.40092	0.0159218	0.0812625	yes	down	0.0377484	0.0536764	0.055752	0	0	0.0265135	0.0490589	0.00883784	MAP3K13-201	mitogen-activated protein kinase kinase kinase 13 [Sus scrofa]	XP_020925639.1
Chr13_102467284_102479788	MSTRG.32189,Pig.06534	0.0130068	-6.26459	2.75686e-06	8.58036e-05	yes	down	0.0817881	0.0536764	0.0619467	0	0	0	0.0658037	0	#N/A	#N/A	#N/A
Chr13_102470212_102478285	MSTRG.32189,Pig.06534	0.0189273	-5.72339	0.000101626	0.00162122	yes	down	0.0629139	0.0230042	0.0495574	0	0	0	0.0451585	0	#N/A	#N/A	#N/A
Chr13_102470212_102479788	MSTRG.32189,Pig.06534	0.00121457	-9.68533	1.32971e-15	3.68328e-13	yes	down	0.736093	0.728465	0.65044	0	0	0	0.704999	0	#N/A	#N/A	#N/A
Chr13_102470212_102498161	MSTRG.32189,Pig.06534	0.0135776	-6.20262	7.51648e-06	0.000206331	yes	down	0.0503312	0.0766805	0.0619467	0	0	0	0.0629861	0	#N/A	#N/A	#N/A
Chr13_102490154_102498161	MSTRG.32189,Pig.06534	0.0190733	-5.7123	0.0111781	1	yes	down	0.0503312	0.0536764	0.0309733	0	0	0	0.0449936	0	#N/A	#N/A	#N/A
Chr13_102744260_102753420	Pig.06539	0.0157511	-5.98841	0.000240066	0.00323665	yes	down	0.0440398	0.0690125	0.0495574	0	0	0	0.0542032	0	ST6GAL1-201	beta-galactoside alpha-2,6-sialyltransferase 1 isoform X1 [Sus scrofa]	XP_020925678.1
Chr13_10327454_10331181	Pig.15846	10.1499	3.34339	0.00314491	0.0233721	yes	up	0	0	0.0123893	0.0885317	0.0901321	0.0707027	0.00412978	0.0831222	RBM6-201	RNA-binding protein 6 isoform X1 [Sus scrofa]	XP_003483235.1
Chr13_10327454_10337372	Pig.15846	11.2604	3.49319	0.0199262	0.0963734	yes	up	0	0	0	0.0177063	0.0245815	0.0353514	0	0.0258797	RBM6-201	RNA-binding protein 6 isoform X1 [Sus scrofa]	XP_003483235.1
Chr13_10429524_10429861	Pig.15844	36.5727	5.19269	0.00265847	0.0203016	yes	up	0	0	0	0.0885317	0.0901321	0.0707027	0	0.0831222	SEMA3F-201	semaphorin-3F isoform X1 [Sus scrofa]	XP_001925178.2
Chr13_105669263_105669434		0.0109437	-6.51376	0.00346821	0.0252814	yes	down	0.0503312	0.0766805	0.105309	0	0	0	0.0774403	0	#N/A	#N/A	#N/A
Chr13_110968727_110983363	Pig.15072	2.57608	1.36517	0.0418527	0.159806	yes	up	0.0566225	0.0153361	0.0495574	0.150504	0.221233	0.220946	0.0405053	0.197561	DLG1-202	disks large homolog 1 isoform X1 [Sus scrofa]	XP_020925751.1
Chr13_110968727_110999222	Pig.15072	11.1278	3.4761	0.0177293	0.0876968	yes	up	0	0	0.0123893	0.0619722	0.10652	0.106054	0.00412978	0.0915153	DLG1-202	disks large homolog 1 isoform X1 [Sus scrofa]	XP_020925751.1
Chr13_111713417_111729718	Pig.15058	0.0187747	-5.73506	8.86399e-05	0.00145207	yes	down	0.0440398	0.0690125	0.0247787	0	0	0	0.0459436	0	Ubxn7	UBX domain-containing protein 7 [Sus scrofa]	XP_020925820.1
Chr13_112533350_112537599	Pig.15042	18.856	4.23695	0.0150922	1	yes	up	0	0	0	0.0265595	0.0327753	0.0707027	0	0.0433458	LRCH3-202	leucine-rich repeat and calponin homology domain-containing protein 3 isoform X1 [Sus scrofa]	XP_005670199.1
Chr13_113525036_113525569	Pig.02190	31.8468	4.99308	0.00878344	0.0511723	yes	up	0	0	0	0.132798	0.049163	0.0265135	0	0.0694914	HEG1	protein HEG homolog 1 [Sus scrofa]	XP_020925878.1
Chr13_113904848_113948236	Pig.02185	0.0305833	-5.03111	0.0113041	0.0616162	yes	down	0.0125828	0.0460083	0.0247787	0	0	0	0.0277899	0	TRIO-201	PREDICTED: kalirin isoform X8 [Ovis aries musimon]	XP_025137194.1
Chr13_113911561_113911799	Pig.02185	0.0363399	-4.7823	0.0314276	1	yes	down	0.0440398	0.0153361	0.0123893	0	0	0	0.0239217	0	TRIO-201	PREDICTED: kalirin isoform X8 [Ovis aries musimon]	XP_025137194.1
Chr13_113922653_113948236	Pig.02185	0.0233103	-5.42289	0.00019771	0.00278655	yes	down	0.031457	0.0613444	0.018584	0	0	0	0.0371285	0	TRIO-201	PREDICTED: kalirin isoform X8 [Ovis aries musimon]	XP_025137194.1
Chr13_113946119_113948236	Pig.02185	0.02315	-5.43284	0.000621861	0.00676718	yes	down	0.0629139	0.0306722	0.018584	0	0	0	0.0373901	0	TRIO-201	PREDICTED: kalirin isoform X8 [Ovis aries musimon]	XP_025137194.1
Chr13_119129735_119135708	MSTRG.32525,Pig.02129	0.18562	-2.42957	0.00588743	0.0376346	yes	down	0.0754967	0.0536764	0.0619467	0	0.049163	0.0176757	0.0637066	0.0222795	#N/A	#N/A	#N/A
Chr13_119129735_119141267	MSTRG.32525,Pig.02129	0.163851	-2.60954	0.00734992	0.0444349	yes	down	0.0377484	0.0460083	0.055752	0.0177063	0.0245815	0	0.0465029	0.0140959	#N/A	#N/A	#N/A
Chr13_12507812_12509012		11.5238	3.52655	0.0486796	1	yes	up	0	0	0	0.0265595	0.0163877	0.0353514	0	0.0260995	#N/A	#N/A	#N/A
Chr13_126126025_126150599	Pig.02084	29.4193	4.87869	0.00203404	0.0166159	yes	up	0	0	0	0.0708254	0.049163	0.0795406	0	0.0665096	PHLDB2-201	LOW QUALITY PROTEIN: pleckstrin homology-like domain family B member 2 [Sus scrofa]	XP_020926050.1
Chr13_126149254_126150599	Pig.02084	3.5777	1.83903	0.00175602	0.0150298	yes	up	0.157285	0.176365	0.037168	0.53119	1.04881	0.892622	0.123606	0.824207	PHLDB2-201	LOW QUALITY PROTEIN: pleckstrin homology-like domain family B member 2 [Sus scrofa]	XP_020926050.1
Chr13_126189693_126191041	Pig.02084	0.110996	-3.17142	0.00327285	0.0241461	yes	down	0.0440398	0.130357	0.0309733	0	0.0163877	0.0265135	0.0684567	0.0143004	PHLDB2-201	LOW QUALITY PROTEIN: pleckstrin homology-like domain family B member 2 [Sus scrofa]	XP_020926050.1
Chr13_126189693_126223532		0.00962647	-6.69878	6.30607e-06	0.000177913	yes	down	0.0943709	0.0920166	0.0805307	0	0	0	0.0889727	0	#N/A	#N/A	#N/A
Chr13_12656906_12657860	MSTRG.30947,MSTRG.30945	0.0271699	-5.20185	0.0105196	0.0582784	yes	down	0.031457	0.0383403	0.0247787	0	0	0	0.0315253	0	#N/A	#N/A	#N/A
Chr13_126811720_126814276	Pig.02081	0.0134761	-6.21345	7.93039e-05	0.00133502	yes	down	0.0566225	0.0460083	0.0867254	0	0	0	0.0631187	0	NECTIN3-201	nectin-3 isoform X2 [Sus scrofa]	XP_020926054.1
Chr13_126811720_126850038	Pig.02081	0.0844367	-3.56599	2.69022e-15	6.30546e-13	yes	down	0.54106	0.483087	0.699998	0.115091	0.0573568	0.0972162	0.574715	0.0898881	NECTIN3-201	nectin-3 isoform X2 [Sus scrofa]	XP_020926054.1
Chr13_126811720_126850641	Pig.02081	0.0261619	-5.25639	0.00113659	0.0107552	yes	down	0.0377484	0.0230042	0.037168	0	0	0	0.0326402	0	NECTIN3-201	nectin-3 isoform X2 [Sus scrofa]	XP_020926054.1
Chr13_126832355_126850038	Pig.02081	0.109419	-3.19206	3.90131e-19	1.98121e-16	yes	down	1.12616	1.31124	1.72831	0.407246	0.262202	0.167919	1.38857	0.279122	NECTIN3-201	nectin-3 isoform X2 [Sus scrofa]	XP_020926054.1
Chr13_126832355_126850641	Pig.02081	0.11116	-3.16929	0.000378186	0.00462001	yes	down	0.0754967	0.0536764	0.074336	0	0.0245815	0.0176757	0.0678364	0.0140857	NECTIN3-201	nectin-3 isoform X2 [Sus scrofa]	XP_020926054.1
Chr13_126837639_126850038	Pig.02081	0.0781911	-3.67685	9.30521e-06	0.000242333	yes	down	0.150993	0.0766805	0.0681414	0.0177063	0.0245815	0	0.0986051	0.0140959	NECTIN3-201	nectin-3 isoform X2 [Sus scrofa]	XP_020926054.1
Chr13_130153766_130160627	Pig.02066	18.5882	4.21631	0.0068761	0.0421308	yes	up	0	0	0	0.0177063	0.0409691	0.0707027	0	0.0431261	BBX-201	HMG box transcription factor BBX isoform X1 [Sus scrofa]	XP_020926116.1
Chr13_132164238_132184644	Pig.02057,MSTRG.32657	0.0694157	-3.84859	0.0158427	0.0809943	yes	down	0.0377484	0.0536764	0.0495574	0.0177063	0	0	0.046994	0.00590211	#N/A	#N/A	#N/A
Chr13_153226350_153311960	Pig.00962,MSTRG.32815	13.6701	3.77295	0.000976469	0.00988472	yes	up	0.0251656	0	0	0.212476	0.221233	0.212108	0.00838853	0.215273	#N/A	#N/A	#N/A
Chr13_153304760_153311960	Pig.00962,MSTRG.32815	2.87739	1.52476	0.00662274	0.0412669	yes	up	0.0503312	0.0996847	0.074336	0.345274	0.532599	0.327	0.0747839	0.401624	#N/A	#N/A	#N/A
Chr13_16849956_16853113	Pig.10906	13.3997	3.74413	0.0235886	0.106481	yes	up	0	0	0	0.0708254	0.0163877	0	0	0.029071	APPL1-201	DCC-interacting protein 13-alpha [Sus scrofa]	NP_001128438.1
Chr13_169351797_169415970	Pig.15023	0.00837559	-6.89959	0.00194584	0.0160677	yes	down	0.371192	0.291386	0.353096	0	0.0163877	0	0.338558	0.00546255	APP-203	PREDICTED: amyloid beta A4 protein, partial [Galeopterus variegatus]	NP_999537.1
Chr13_175246386_175249322	Pig.15355	0.250323	-1.99814	0.00462478	0.0315957	yes	down	0.0566225	0.0536764	0.055752	0.0177063	0.0245815	0.0353514	0.0553503	0.0258797	SCAF4-201	splicing factor, arginine/serine-rich 15 isoform X2 [Sus scrofa]	XP_003358973.2
Chr13_179900839_179909050	Pig.13973	13.0049	3.70099	0.0211667	0.0998374	yes	up	0	0	0	0.0442659	0.0163877	0.0265135	0	0.0290557	MORC3-203	MORC family CW-type zinc finger protein 3 isoform X1 [Sus scrofa]	XP_003132812.1
Chr13_182789057_182790521	Pig.17399	0.0727483	-3.78094	0.0430162	1	yes	down	0	0.0230042	0.0123893	0	0	0	0.0117978	0	BRWD1-203	bromodomain and WD repeat-containing protein 1 isoform X1 [Sus scrofa]	XP_020926647.1
Chr13_185946951_185955198		17.2984	4.11257	0.0117694	1	yes	up	0	0	0	0.0265595	0.049163	0.0441892	0	0.0399706	#N/A	#N/A	#N/A
Chr13_186960416_186965103	Pig.15115	0.177262	-2.49604	0.000341915	0.00425231	yes	down	0.0440398	0.107353	0.0867254	0.0354127	0.0163877	0.0265135	0.0793726	0.0261046	TRAPPC10	trafficking protein particle complex subunit 10 [Sus scrofa]	XP_020926737.1
Chr13_188539138_188539513	Pig.21788,MSTRG.33300	27.7319	4.79348	0.0231929	0.105476	yes	up	0	0	0	0.123944	0.0573568	0	0	0.0604337	#N/A	#N/A	#N/A
Chr13_188650608_188651323	Pig.20313	0.0160138	-5.96454	0.000248883	0.00329716	yes	down	0.0943709	0.0306722	0.037168	0	0	0	0.0540704	0	Ftcd	formimidoyltransferase-cyclodeaminase [Sus scrofa]	NP_999440.1
Chr13_26760230_26789617	Pig.01528	0.0392515	-4.67111	0.0312982	1	yes	down	0	0.0460083	0.018584	0	0	0	0.0215308	0	SUCLG2-201	succinate--CoA ligase [GDP-forming]	XP_020926487.1
Chr13_28511452_28518709	Pig.01536	0.329604	-1.60119	0.0263375	0.114317	yes	down	0.0188742	0.0613444	0.0619467	0.0442659	0.0245815	0.0176757	0.0473884	0.028841	FRMD4B-204	FERM domain-containing protein 4B isoform X4 [Sus scrofa]	XP_020924862.1
Chr13_30295122_30307830	Pig.01539	34.3126	5.10067	0.000385305	0.0046521	yes	up	0	0	0	0.0708254	0.0573568	0.106054	0	0.0780787	FOXP1-203	forkhead box protein P1 isoform X4 [Sus scrofa]	XP_020926500.1
Chr13_39488074_39494259	Pig.01566	4.0936	2.03337	0.0484054	0.177273	yes	up	0.031457	0	0	0.0619722	0.0573568	0.12373	0.0104857	0.0810196	ARL8B-203	PREDICTED: LOW QUALITY PROTEIN: ADP-ribosylation factor-like protein 8B [Trichechus manatus latirostris]	XP_012327586.1
Chr13_4355865_4359504	Pig.07846	2.54891	1.34988	0.0243905	0.10897	yes	up	0.031457	0.0613444	0.0619467	0.19477	0.286784	0.256297	0.0515827	0.24595	SNRK-201	SNF-related serine/threonine-protein kinase isoform X1 [Sus scrofa]	XP_020927373.1
Chr13_46154665_46165821	Pig.14691,MSTRG.31383	72.3961	6.17784	1.83237e-05	0.000413574	yes	up	0	0	0	0.0708254	0.254009	0.185595	0	0.170143	#N/A	#N/A	#N/A
Chr13_46154665_46178093	Pig.14691,MSTRG.31383	50.2571	5.65125	0.00369067	0.0265223	yes	up	0	0	0	0.150504	0.0983259	0.0883784	0	0.112403	#N/A	#N/A	#N/A
Chr13_46374878_46382501		0.0803693	-3.63721	0.0436616	1	yes	down	0.0125828	0	0.018584	0	0	0	0.0103889	0	#N/A	#N/A	#N/A
Chr13_48146150_48147848	MSTRG.31444,Pig.17823,MSTRG.31443	15.1562	3.92183	0.00925008	0.0529793	yes	up	0	0	0	0.0354127	0.0327753	0.0353514	0	0.0345131	#N/A	#N/A	#N/A
Chr13_48514433_48516059	Pig.17826	42.2908	5.40227	0.000136588	0.00204012	yes	up	0	0	0	0.141651	0.0983259	0.0441892	0	0.094722	FBLN2-201	fibulin-2 isoform X1 [Sus scrofa]	XP_020925041.1
Chr13_51664314_51672703	Pig.06056	21.9293	4.45479	0.00669304	0.0414481	yes	up	0	0	0	0.0796785	0.049163	0.0176757	0	0.0488391	NPHP3	nephrocystin-3 isoform X1 [Sus scrofa]	XP_020925119.1
Chr13_52653182_52713934		5.78686e-07	-20.7207	0.00382544	0.0272339	yes	down	1.10729	0	0.761944	0	0	0	0.623077	0	#N/A	#N/A	#N/A
Chr13_52717722_52718496	MSTRG.31563,Pig.06063	0.0267311	-5.22534	0.00470608	0.0320077	yes	down	0.0251656	0.0460083	0.0247787	0	0	0	0.0319842	0	#N/A	#N/A	#N/A
Chr13_54850041_54856348	Pig.06073,MSTRG.31592	18.0425	4.17333	0.0024888	0.0192471	yes	up	0	0	0	0.0619722	0.0245815	0.0353514	0	0.040635	#N/A	#N/A	#N/A
Chr13_55003824_55067505	Pig.06075	0.174506	-2.51865	0.00102027	0.0100835	yes	down	0.295696	0.184033	0.0681414	0.0442659	0.0245815	0.106054	0.182623	0.0583005	PCCB-205	propionyl-CoA carboxylase beta chain, mitochondrial precursor [Sus scrofa]	NP_999066.1
Chr13_57321321_57326544		54.8194	5.77661	3.51941e-05	0.000696341	yes	up	0	0	0	0.0973849	0.139295	0.141405	0	0.126028	#N/A	#N/A	#N/A
Chr13_60070249_60099009	Pig.06112	13.0902	3.71041	0.0161073	0.0813915	yes	up	0	0	0.0123893	0.0619722	0.204846	0.0618649	0.00412978	0.109561	RASA2-203	ras GTPase-activating protein 2 isoform X2 [Sus scrofa]	XP_020925202.1
Chr13_60625423_60632435	Pig.06117	6.98928	2.80514	0.00658882	0.0411396	yes	up	0.0251656	0	0	0.0619722	0.0901321	0.185595	0.00838853	0.112566	TFDP2-201	transcription factor Dp-2 isoform X1 [Sus scrofa]	XP_020925210.1
Chr13_60625423_60706987	Pig.06117	8.3867	3.0681	0.044439	0.166935	yes	up	0	0	0.0123893	0.0265595	0.0573568	0.12373	0.00412978	0.0692154	TFDP2-201	transcription factor Dp-2 isoform X1 [Sus scrofa]	XP_020925210.1
Chr13_60625423_60715757	Pig.06117	5.29575	2.40484	0.00101648	0.0100835	yes	up	0	0.0306722	0.018584	0.123944	0.122907	0.220946	0.0164187	0.155933	TFDP2-201	transcription factor Dp-2 isoform X1 [Sus scrofa]	XP_020925210.1
Chr13_67354140_67355382	MSTRG.31731,Pig.04766	0.0222982	-5.48693	0.00325691	0.0241455	yes	down	0.0503312	0.0153361	0.0495574	0	0	0	0.0384082	0	#N/A	#N/A	#N/A
Chr13_67357897_67377692	MSTRG.31731,Pig.04766	0.00889199	-6.81328	5.24319e-07	2.21889e-05	yes	down	0.119536	0.0766805	0.09292	0	0	0	0.096379	0	#N/A	#N/A	#N/A
Chr13_67379126_67387509	MSTRG.31731,Pig.04766	0.045911	-4.44502	0.0249618	0.11055	yes	down	0.0377484	0	0.018584	0	0	0	0.0187775	0	#N/A	#N/A	#N/A
Chr13_67382409_67387509	MSTRG.31731,Pig.04766	0.0348575	-4.84239	0.0112462	1	yes	down	0.0125828	0.0230042	0.037168	0	0	0	0.0242517	0	#N/A	#N/A	#N/A
Chr13_68731709_68734966	Pig.04754,MSTRG.31765	30.3708	4.92461	0.00159272	0.0140667	yes	up	0	0	0	0.0265595	0.163877	0.0265135	0	0.0723165	#N/A	#N/A	#N/A
Chr13_70616611_70627247	Pig.04738,MSTRG.31828	13.5339	3.75851	0.0139374	0.0730936	yes	up	0	0	0	0.0265595	0.049163	0.0176757	0	0.0311327	#N/A	#N/A	#N/A
Chr13_70616611_70654615	MSTRG.31828	12.0282	3.58835	0.0284797	0.120357	yes	up	0	0	0	0	0.0409691	0.0441892	0	0.0283861	0	0	XP_004478869.1
Chr13_7202646_7225593	MSTRG.30668	0.01339	-6.2227	0.00934152	0.0533026	yes	down	0.0692053	0.0920166	0.0309733	0	0	0	0.0640651	0	0	0	XP_003358456.1
Chr13_72209698_72225752	Pig.04733	0.173685	-2.52546	0.04687	0.173631	yes	down	0.0629139	0.0306722	0.018584	0.0177063	0	0.0176757	0.0373901	0.011794	ARHGEF26-201	rho guanine nucleotide exchange factor 26 isoform X1 [Sus scrofa]	XP_020925348.1
Chr13_75886415_75887227		4.36323	2.1254	0.0247006	0.109873	yes	up	0.0125828	0.0230042	0	0.132798	0.139295	0	0.0118623	0.0906975	#N/A	#N/A	#N/A
Chr13_7629661_7644732	MSTRG.30700,Pig.07899	0.272728	-1.87446	0.0441675	0.166653	yes	down	0.0125828	0.0460083	0.0433627	0.0265595	0.0245815	0	0.0339846	0.017047	#N/A	#N/A	#N/A
Chr13_7644063_7653595	MSTRG.30700,Pig.07899	0.474587	-1.07526	0.00968217	0.0546326	yes	down	0.176159	0.222373	0.148672	0.132798	0.17207	0.176757	0.182402	0.160542	#N/A	#N/A	#N/A
Chr13_86632258_86638860	Pig.11305	16.9317	4.08165	0.00821906	0.04844	yes	up	0	0	0	0.0619722	0.0245815	0.0265135	0	0.0376891	SEC62-201	translocation protein SEC62 [Sus scrofa]	XP_006764151.1
Chr13_86791164_86815919	Pig.11303	5.30723	2.40796	0.00240139	0.0188099	yes	up	0	0.0230042	0.0123893	0.0885317	0.139295	0.106054	0.0117978	0.111294	PHC3-201	polyhomeotic-like protein 3 isoform X1 [Sus scrofa]	XP_020925436.1
Chr13_86804294_86815919	Pig.11303	3.98789	1.99563	2.08713e-05	0.000451027	yes	up	0.0566225	0.0843486	0.018584	0.38954	0.319559	0.433054	0.053185	0.380718	PHC3-201	polyhomeotic-like protein 3 isoform X1 [Sus scrofa]	XP_020925436.1
Chr13_86836296_86842481	Pig.11303	0.225503	-2.14878	3.79297e-05	0.000740845	yes	down	0.239073	0.406407	0.724776	0.123944	0.262202	0.20327	0.456752	0.196472	PHC3-201	polyhomeotic-like protein 3 isoform X1 [Sus scrofa]	XP_020925436.1
Chr13_9451851_9452894	Pig.15877	4.63854	2.21367	0.0231236	0.105476	yes	up	0.0125828	0.0153361	0	0.0885317	0.10652	0.0353514	0.0093063	0.0768009	QRICH1-203	glutamine-rich protein 1 [Sus scrofa]	XP_005669589.1
Chr13_98711348_98734424	Pig.06481	4.52373	2.17751	0.0475218	0.175089	yes	up	0	0	0.0247787	0.0973849	0.0573568	0.0618649	0.00825956	0.0722022	ATP11B	probable phospholipid-transporting ATPase IF isoform X5 [Sus scrofa]	XP_020925528.1
Chr13_99751851_99755967	Pig.06491	2.74925	1.45904	0.0307519	0.127658	yes	up	0.0440398	0.0230042	0.018584	0.106238	0.221233	0.114892	0.0285426	0.147454	Parl	presenilins-associated rhomboid-like protein, mitochondrial isoform X1 [Sus scrofa]	XP_003483328.1
Chr14_101274591_101287518	Pig.01977	3.55673	1.83055	0.00760576	0.0458906	yes	up	0.0125828	0.0690125	0.018584	0.16821	0.221233	0.256297	0.0333931	0.215247	BTAF1-202	TATA-binding protein-associated factor 172 isoform X1 [Sus scrofa]	XP_003359339.2
Chr14_103626482_103637085	Pig.01957	26.2641	4.71502	0.0183355	1	yes	up	0	0	0	0.0177063	0.0983259	0.0707027	0	0.062245	TBC1D12-201	TBC1 domain family member 12 isoform X1 [Sus scrofa]	XP_020929670.1
Chr14_104062358_104147272		0.00373872	-8.06324	1.65807e-09	1.26304e-07	yes	down	0.125828	0.383403	0.173451	0	0	0	0.22756	0	#N/A	#N/A	#N/A
Chr14_104135799_104147272	Pig.01952	0.00632332	-7.3051	9.50177e-07	3.61899e-05	yes	down	0.0503312	0.214705	0.136283	0	0	0	0.133773	0	CYP2C42-206	cytochrome P450 2C18 [Sus scrofa]	XP_020929678.1
Chr14_108871875_108873556	Pig.01895	0.0121553	-6.36227	7.14747e-05	0.00123741	yes	down	0.100662	0.0690125	0.0433627	0	0	0	0.0710125	0	ABCC2-202	LOW QUALITY PROTEIN: canalicular multispecific organic anion transporter 1 [Sus scrofa]	XP_020929369.1
Chr14_109086258_109091278	Pig.01892	0.0250429	-5.31945	0.00771048	0.0464305	yes	down	0.0503312	0.0536764	0	0	0	0	0.0346692	0	CPN1-201	carboxypeptidase N catalytic chain isoform X1 [Sus scrofa]	XP_003483585.1
Chr14_109843813_109855780	Pig.21784	0.00651014	-7.2631	0.000368126	0.00452291	yes	down	0.295696	0.0536764	0.055752	0	0	0	0.135041	0	CYP2C42-206	cytochrome P450 2C18 [Sus scrofa]	XP_013839051.2
Chr14_112746957_112780847	Pig.16330	60.909	5.92858	0.00108122	0.0104587	yes	up	0	0	0	0.0442659	0.163877	0.220946	0	0.143029	SH3PXD2A-201	SH3 and PX domain-containing protein 2A isoform X1 [Sus scrofa]	XP_020928421.1
Chr14_113362657_113380470		0.0642073	-3.96112	2.33696e-22	2.01164e-19	yes	down	5.41689	3.42762	5.03627	0.504631	0.393304	0.742379	4.62693	0.546771	#N/A	#N/A	#N/A
Chr14_11639751_11660315	Pig.05713	25.0124	4.64457	0.00033722	0.0042111	yes	up	0.0188742	0	0	0.274448	0.286784	0.327	0.00629139	0.296077	SPECC1L	cytospin-A isoform X1 [Sus scrofa]	XP_020929455.1
Chr14_11660108_11660315	Pig.05713	8.25084	3.04454	0.0449434	0.168027	yes	up	0	0	0.0123893	0.0354127	0.0901321	0.0795406	0.00412978	0.0683618	SPECC1L	cytospin-A isoform X1 [Sus scrofa]	XP_020929455.1
Chr14_11660108_11704284	Pig.05713	22.4907	4.49125	0.0499526	1	yes	up	0	0	0	0.0354127	0.049163	0.0707027	0	0.0517595	SPECC1L	cytospin-A isoform X1 [Sus scrofa]	XP_020929455.1
Chr14_120756086_120760994	Pig.05127	0.0237616	-5.39523	0.000444725	0.00523196	yes	down	0.0125828	0.0383403	0.055752	0	0	0	0.0355584	0	GPAM-201	NR:NA	F1S5L4.3
Chr14_125258331_125278793	Pig.05160	0.0336309	-4.89407	0.0275105	1	yes	down	0.0125828	0.0383403	0.0247787	0	0	0	0.0252339	0	SHTN1-201	shootin-1 isoform X1 [Sus scrofa]	XP_001925670.2
Chr14_129466510_129489935	Pig.12072	0.206565	-2.27534	0.0383457	0.150373	yes	down	0.0251656	0.122689	0.0123893	0.0354127	0.0245815	0	0.0534146	0.0199981	FGFR2-207	PREDICTED: fibroblast growth factor receptor 2 [Camelus bactrianus]	XP_010968189.1
Chr14_129722138_129804031	MSTRG.35885,Pig.12074	0.246551	-2.02004	0.00054001	0.00615555	yes	down	0.125828	0.245378	0.148672	0.0354127	0.17207	0.0353514	0.173293	0.0809448	#N/A	#N/A	#N/A
Chr14_129750351_129804031	MSTRG.35885,Pig.12074	0.267261	-1.90368	0.000106525	0.00166548	yes	down	0.188742	0.168697	0.142477	0.0708254	0.10652	0.0707027	0.166639	0.0826826	#N/A	#N/A	#N/A
Chr14_129783657_129804031	MSTRG.35885,Pig.12074	0.147995	-2.75638	0.00360477	0.0259663	yes	down	0.031457	0.0843486	0.0619467	0	0.049163	0	0.0592507	0.0163877	#N/A	#N/A	#N/A
Chr14_129787047_129804031	MSTRG.35885,Pig.12074	0.125309	-2.99644	1.80723e-06	6.05126e-05	yes	down	0.106954	0.191701	0.260176	0.0442659	0.0163877	0.0707027	0.186277	0.0437854	#N/A	#N/A	#N/A
Chr14_132637875_132640389	MSTRG.35947	0.240066	-2.0585	4.83118e-06	0.000141544	yes	down	0.22649	0.260714	0.204424	0.0973849	0.131101	0.0795406	0.230543	0.102676	0	0	XP_001929044.4
Chr14_140353741_140355292	Pig.22737	0.0050908	-7.61789	1.46042e-07	7.54221e-06	yes	down	0.188742	0.0920166	0.223008	0	0	0	0.167922	0	CYP2E1-202	cytochrome P450 2E1 isoform X1 [Sus scrofa]	XP_005657566.1
Chr14_1515183_1523507	Pig.05880,MSTRG.33362	11.6292	3.53968	0.0352942	1	yes	up	0	0	0	0.0354127	0.0163877	0.0265135	0	0.0261046	#N/A	#N/A	#N/A
Chr14_1755222_1759676	Pig.05878	14.204	3.82823	0.0357763	0.142497	yes	up	0	0	0	0.0442659	0.0245815	0.0265135	0	0.031787	HECTD4-201	probable E3 ubiquitin-protein ligase HECTD4 isoform X1 [Sus scrofa]	XP_005657379.1
Chr14_19925712_19947453		0.246133	-2.02249	0.0135891	0.071761	yes	down	0.0629139	0.115021	0.055752	0.053119	0.0163877	0.0353514	0.0778956	0.0349527	#N/A	#N/A	#N/A
Chr14_21583839_21588341	Pig.15735	30.3913	4.92559	0.00280581	0.0212669	yes	up	0	0	0	0.0708254	0.0655506	0.0707027	0	0.0690262	DISC1-201	disrupted in schizophrenia 1 protein isoform X1 [Sus scrofa]	XP_020929235.1
Chr14_21611369_21624122	Pig.15735	12.9129	3.69074	0.0294253	0.122989	yes	up	0	0	0	0.0354127	0.0163877	0.0353514	0	0.0290506	DISC1-201	disrupted in schizophrenia 1 protein isoform X1 [Sus scrofa]	XP_020929235.1
Chr14_22954126_22963710	Pig.15740	0.137692	-2.86048	0.0198804	0.0963044	yes	down	0.0503312	0.0460083	0.0309733	0	0.0327753	0	0.0424376	0.0109251	MAP3K21-201	mitogen-activated protein kinase kinase kinase MLK4 [Sus scrofa]	XP_001928249.1
Chr14_24741144_24760271	Pig.12220	0.0330937	-4.9173	0.00147687	0.0133137	yes	down	0.0125828	0.0536764	0.0123893	0	0	0	0.0262162	0	B3GALNT2-201	UDP-GalNAc:beta-1,3-N-acetylgalactosaminyltransferase 2 [Sus scrofa]	XP_020930057.1
Chr14_3291825_3295256	Pig.05842	15.3402	3.93925	0.0314539	1	yes	up	0	0	0	0.0354127	0.0245815	0.0441892	0	0.0347278	GIT2-209	ARF GTPase-activating protein GIT2 isoform X2 [Sus scrofa]	XP_005670775.1
Chr14_38645787_38650601	Pig.07758	0.0363591	-4.78154	0.0337801	1	yes	down	0	0.0383403	0.0309733	0	0	0	0.0231045	0	XPO7-201	Exportin-7 [Pteropus alecto]	ELK19239.1
Chr14_39070772_39073187		0.0318482	-4.97265	0.00418719	0.0293177	yes	down	0.0251656	0.0306722	0.0247787	0	0	0	0.0268722	0	#N/A	#N/A	#N/A
Chr14_39143918_39152875	Pig.07737	0.0422491	-4.56493	0.0146448	1	yes	down	0.0125828	0.0230042	0.0247787	0	0	0	0.0201219	0	PPP3CA-201	serine/threonine-protein phosphatase 2B catalytic subunit gamma isoform isoform X1 [Sus scrofa]	XP_003483429.1
Chr14_39164972_39170296	Pig.07737	5.85774	2.55034	0.0322709	0.13252	yes	up	0	0.0153361	0	0.0619722	0.049163	0.0353514	0.00511203	0.0488288	PPP3CA-201	serine/threonine-protein phosphatase 2B catalytic subunit gamma isoform isoform X1 [Sus scrofa]	XP_003483429.1
Chr14_41912046_41913507	Pig.07715	4.33279	2.1153	0.00148981	0.0133907	yes	up	0.0377484	0.0230042	0.0123893	0.239036	0.180264	0.159081	0.0243806	0.192794	KCTD9-201	BTB/POZ domain-containing protein KCTD9 [Sus scrofa]	XP_003132863.3
Chr14_41912046_41931580	Pig.07715	7.94034	2.9892	3.0406e-05	0.000625994	yes	up	0	0.0306722	0.0123893	0.132798	0.204846	0.265135	0.0143538	0.200926	KCTD9-201	BTB/POZ domain-containing protein KCTD9 [Sus scrofa]	XP_003132863.3
Chr14_41930481_41931580	Pig.07715	9.37641	3.22904	2.15975e-07	1.07881e-05	yes	up	0.0251656	0	0.018584	0.19477	0.376916	0.238622	0.0145832	0.270103	KCTD9-201	BTB/POZ domain-containing protein KCTD9 [Sus scrofa]	XP_003132863.3
Chr14_41930481_41938885	Pig.07715	3.50622	1.80992	0.0129354	0.0691476	yes	up	0.0125828	0.0306722	0.0123893	0.115091	0.139295	0.0972162	0.0185481	0.117201	KCTD9-201	BTB/POZ domain-containing protein KCTD9 [Sus scrofa]	XP_003132863.3
Chr14_42930420_42931617	Pig.05610	33.7412	5.07644	0.000574127	0.00643149	yes	up	0	0	0	0.115091	0.0573568	0.053027	0	0.0751584	DPYSL2-201	dihydropyrimidinase-related protein 2 isoform X1 [Sus scrofa]	XP_001927836.1
Chr14_44296137_44312363	Pig.05594	0.0539836	-4.21133	0.00902063	0.0520565	yes	down	0.0125828	0.0230042	0.0123893	0	0	0	0.0159921	0	ELP3-201	elongator complex protein 3 [Sus scrofa]	XP_020927937.1
Chr14_45257199_45260199	Pig.05586	0.0932114	-3.42335	0.0485059	1	yes	down	0	0.0153361	0.0123893	0	0	0	0.00924181	0	HMBOX1-201	homeobox-containing protein 1 isoform X4 [Sus scrofa]	XP_001926771.4
Chr14_47342240_47351646	Pig.05570	0.0185647	-5.7513	0.00041373	0.00492436	yes	down	0	0.0613444	0.074336	0	0	0	0.0452268	0	FDFT1-202	squalene synthase [Sus scrofa]	NP_001161120.1
Chr14_47348104_47351646	Pig.05570	0.235177	-2.08818	0.00672471	0.0414781	yes	down	0.0125828	0.138025	0.123893	0.0265595	0.0245815	0.0707027	0.0915004	0.0406146	FDFT1-202	squalene synthase [Sus scrofa]	NP_001161120.1
Chr14_61996195_61997739	Pig.07212,MSTRG.34617	19.2877	4.26961	0.016064	0.0813335	yes	up	0	0	0	0.053119	0.0327753	0.0441892	0	0.0433612	#N/A	#N/A	#N/A
Chr14_62315698_62320947		19.9295	4.31683	0.00795899	0.0473653	yes	up	0	0	0	0.0619722	0.0737444	0	0	0.0452389	#N/A	#N/A	#N/A
Chr14_64265041_64269173	Pig.07164	0.0278368	-5.16686	0.000318955	0.0040326	yes	down	0.031457	0.0230042	0.037168	0	0	0	0.030543	0	ATP2A2-201	sarcoplasmic/endoplasmic reticulum calcium ATPase 2 isoform X1 [Sus scrofa]	XP_020927734.1
Chr14_65287728_65290729	Pig.07150	0.317518	-1.65509	0.00140397	0.0127698	yes	down	0.106954	0.115021	0.105309	0.0973849	0.0409691	0.053027	0.109095	0.0637937	ATXN2-201	ataxin-2 isoform X3 [Sus scrofa]	XP_020928569.1
Chr14_66979560_66985378		19.5252	4.28727	0.0131929	1	yes	up	0	0	0	0.0177063	0.0573568	0.0618649	0	0.0456427	#N/A	#N/A	#N/A
Chr14_71395453_71403133	Pig.15466,MSTRG.34889	0.252605	-1.98504	0.0352892	0.141296	yes	down	0.0817881	0.0306722	0.018584	0.0354127	0.0245815	0	0.0436814	0.0199981	#N/A	#N/A	#N/A
Chr14_8460735_8474339	Pig.05792	0.0440366	-4.50515	0.0133133	1	yes	down	0	0.0460083	0.0123893	0	0	0	0.0194659	0	ZNRF3-203	E3 ubiquitin-protein ligase ZNRF3 isoform X1 [Sus scrofa]	XP_020929414.1
Chr14_9266160_9274270	Pig.05775	3.96564	1.98755	8.44101e-06	0.000225612	yes	up	0.0503312	0.0383403	0.0309733	0.265595	0.368722	0.24746	0.0398816	0.293926	MTMR3-201	myotubularin-related protein 3 isoform X1 [Sus scrofa]	XP_013838486.2
Chr15_105753393_105754047	Pig.00040	0.0300498	-5.0565	0.0207108	0.0984492	yes	down	0.031457	0.0230042	0.0309733	0	0	0	0.0284782	0	AOX1-204	aldehyde oxidase [Sus scrofa]	NP_001295402.1
Chr15_107692551_107693830	Pig.00015	0.399009	-1.32551	0.0256747	0.112562	yes	down	0.232782	0.122689	0.074336	0.0265595	0.163877	0.132568	0.143269	0.107668	BMPR2-201	bone morphogenetic protein receptor type-2 precursor [Sus scrofa]	NP_001191829.1
Chr15_107979484_108030953		7.56027	2.91844	0.000197724	0.00278655	yes	up	0.0251656	0.0230042	0.0123893	0.345274	0.188458	0.291649	0.0201864	0.275127	#N/A	#N/A	#N/A
Chr15_108430554_108445898	Pig.00008	4.58972	2.1984	0.0164262	0.0825916	yes	up	0.0251656	0.0153361	0.0123893	0.203623	0.131101	0.106054	0.0176303	0.146926	ABI2-201	PREDICTED: abl interactor 2 isoform X1 [Chinchilla lanigera]	XP_020930983.1
Chr15_108518521_108523889	Pig.00007	0.15884	-2.65435	8.68801e-07	3.43797e-05	yes	down	0.213907	0.176365	0.18584	0.053119	0.0901321	0.0265135	0.192038	0.0565882	RAPH1	LOW QUALITY PROTEIN: ras-associated and pleckstrin homology domains-containing protein 1 [Sus scrofa]	XP_020930982.1
Chr15_111010850_111013729	Pig.11694	0.277211	-1.85094	0.00455284	0.0311741	yes	down	0.0943709	0.176365	0.0805307	0.0619722	0.0737444	0.0441892	0.117089	0.0599686	INO80D-201	INO80 complex subunit D isoform X1 [Sus scrofa]	XP_020931699.1
Chr15_111123633_111129108	Pig.11696	11.2292	3.48918	0.0253785	0.111585	yes	up	0	0	0	0.0354127	0.0409691	0	0	0.0254606	NDUFS1-201	NADH-ubiquinone oxidoreductase 75 kDa subunit, mitochondrial [Sus scrofa]	XP_003133651.1
Chr15_111498592_111513262	Pig.11702	0.0327105	-4.9341	0.0443622	1	yes	down	0.0817881	0	0	0	0	0	0.0272627	0	ADAM23-203	disintegrin and metalloproteinase domain-containing protein 23 isoform X1 [Sus scrofa]	XP_020931805.1
Chr15_112572120_112587077	Pig.11712	20.1394	4.33195	0.0193108	1	yes	up	0	0	0	0.0177063	0.0901321	0.0353514	0	0.0477299	CCNYL1-202	cyclin-Y-like protein 1 isoform X1 [Sus scrofa]	XP_005672187.1
Chr15_114471451_114533637	Pig.11726	25.1828	4.65436	0.000302176	0.00386862	yes	up	0	0	0	0.0619722	0.0573568	0.053027	0	0.057452	KANSL1L-201	LOW QUALITY PROTEIN: KAT8 regulatory NSL complex subunit 1-like protein [Sus scrofa]	XP_005672211.2
Chr15_114503744_114533637	MSTRG.37316,Pig.11726	2.40688	1.26716	0.0171198	0.0857294	yes	up	0.0503312	0	0.0433627	0.123944	0.155683	0.159081	0.0312313	0.146236	#N/A	#N/A	#N/A
Chr15_114987303_114993898	Pig.11732	0.0268744	-5.21763	0.0107753	0.0592641	yes	down	0.0125828	0.0383403	0.0433627	0	0	0	0.0314286	0	CPS1-201	LOW QUALITY PROTEIN: carbamoyl-phosphate synthase [ammonia]	XP_005672216.2
Chr15_119454916_119461643	MSTRG.37367,Pig.13892	0.0217523	-5.52269	0.000439348	0.00518874	yes	down	0.0251656	0.0230042	0.0681414	0	0	0	0.0387704	0	#N/A	#N/A	#N/A
Chr15_120570504_120570627		33.8302	5.08024	0.00253832	0.019531	yes	up	0	0	0	0.141651	0.0819383	0	0	0.0745297	#N/A	#N/A	#N/A
Chr15_126481847_126499441		0.0240881	-5.37554	0.00149498	0.0133976	yes	down	0.0440398	0.0383403	0.0247787	0	0	0	0.0357196	0	#N/A	#N/A	#N/A
Chr15_127917554_127920980	Pig.14102	0.0575041	-4.12019	0.0130846	0.0697006	yes	down	0.0188742	0	0.0247787	0	0	0	0.014551	0	CUL3-201	PREDICTED: cullin-3 isoform X1 [Rousettus aegyptiacus]	NP_001179735.1
Chr15_135695908_135700357	Pig.08751	18.0641	4.17506	0.0376149	0.147697	yes	up	0	0	0	0	0.114714	0.0176757	0	0.0441298	USP40-201	ubiquitin carboxyl-terminal hydrolase 40 isoform X1 [Sus scrofa]	XP_020931862.1
Chr15_139705972_139714817	Pig.16069	0.118341	-3.07898	3.16668e-05	0.00064679	yes	down	0.150993	0.0996847	0.167256	0.0265595	0.0655506	0	0.139311	0.0307034	TRAF3IP1-201	TRAF3-interacting protein 1 [Sus scrofa]	XP_020930617.1
Chr15_16010287_16022752	Pig.04255	10.5805	3.40333	0.0363563	0.144054	yes	up	0	0	0	0.0354127	0	0.0353514	0	0.023588	DARS-201	aspartate--tRNA ligase, cytoplasmic isoform X1 [Sus scrofa]	XP_003133314.1
Chr15_16400419_16419151	Pig.04261	17.0252	4.0896	0.0171805	0.0858182	yes	up	0	0	0	0.053119	0.0163877	0.0441892	0	0.0378986	R3HDM1-204	R3H domain-containing protein 1 isoform X6 [Sus scrofa]	XP_020930873.1
Chr15_32019985_32060812	Pig.08949	15.2136	3.92729	0.0410852	0.158064	yes	up	0	0	0	0.0177063	0.0163877	0.0707027	0	0.0349322	PTPN4-201	band 4.1-like protein 5 isoform X1 [Sus scrofa]	KQK84396.1
Chr15_32024135_32060812	Pig.08949	5.95639	2.57444	0.0122501	0.0656129	yes	up	0.0125828	0	0.018584	0.106238	0.21304	0.0441892	0.0103889	0.121156	PTPN4-201	band 4.1-like protein 5 isoform X1 [Sus scrofa]	KQK84396.1
Chr15_32075801_32147077		8.55092	3.09608	0.0396257	0.153739	yes	up	0	0	0	0.0177063	0.0409691	0	0	0.0195585	#N/A	#N/A	#N/A
Chr15_46857316_46862067	MSTRG.36392,Pig.02709	0.101037	-3.30704	0.0219748	0.102538	yes	down	0.0440398	0.0383403	0.055752	0	0	0.0265135	0.046044	0.00883784	#N/A	#N/A	#N/A
Chr15_47627270_47642540	Pig.02696	0.124195	-3.00932	0.0190402	0.0928249	yes	down	0.0440398	0.0383403	0.0247787	0	0.0245815	0	0.0357196	0.00819383	SORBS2-201	sorbin and SH3 domain-containing protein 2 isoform X20 [Sus scrofa]	XP_005671789.1
Chr15_55229766_55237802		0.0187132	-5.7398	2.66709e-05	0.000560458	yes	down	0.0629139	0.0306722	0.0433627	0	0	0	0.0456496	0	#N/A	#N/A	#N/A
Chr15_55520823_55531692	Pig.02647	0.0516904	-4.27396	0.0106443	0.0587559	yes	down	0.0503312	0	0	0	0	0	0.0167771	0	UBXN8-201	UBX domain-containing protein 8 [Sus scrofa]	NP_001231674.1
Chr15_55572130_55584996	Pig.02646	0.130613	-2.93663	0.0450148	0.168088	yes	down	0.031457	0.0613444	0.0495574	0	0	0.0353514	0.0474529	0.0117838	GSR-201	glutathione reductase, mitochondrial [Sus scrofa]	XP_003483683.2
Chr15_55572130_55590845	Pig.02646	0.179779	-2.47571	0.00326598	0.0241461	yes	down	0.0817881	0.0536764	0.0681414	0.0177063	0.0327753	0.0176757	0.0678686	0.0227191	GSR-201	glutathione reductase, mitochondrial [Sus scrofa]	XP_003483683.2
Chr15_55579929_55584996	Pig.02646	0.332481	-1.58866	0.0214664	0.100783	yes	down	0.0943709	0.268382	0.09292	0.0708254	0.10652	0.106054	0.151891	0.0944664	GSR-201	glutathione reductase, mitochondrial [Sus scrofa]	XP_003483683.2
Chr15_61753542_61755658	Pig.00267	0.0577918	-4.11299	0.0423836	1	yes	down	0.0125828	0	0.0309733	0	0	0	0.0145187	0	PRPF40A-201	pre-mRNA-processing factor 40 homolog A isoform X5 [Sus scrofa]	XP_013839583.2
Chr15_66087214_66104895	Pig.00251	0.0659698	-3.92205	0.00220101	0.0175581	yes	down	0.0629139	0.0383403	0.0433627	0.0177063	0	0	0.0482056	0.00590211	ACVR1-202	PREDICTED: activin receptor type-1 isoform X1 [Pteropus alecto]	XP_023398704.1
Chr15_66099298_66122813	Pig.00251	0.108224	-3.2079	2.81456e-07	1.31611e-05	yes	down	0.125828	0.176365	0.154867	0	0.0655506	0.0265135	0.152353	0.030688	ACVR1-202	PREDICTED: activin receptor type-1 isoform X1 [Pteropus alecto]	XP_023398704.1
Chr15_66099298_66141239	Pig.00251	0.0636422	-3.97387	0.00231073	0.0182878	yes	down	0.0503312	0.0460083	0.0495574	0	0	0.0176757	0.0486323	0.00589189	ACVR1-202	PREDICTED: activin receptor type-1 isoform X1 [Pteropus alecto]	XP_023398704.1
Chr15_66111291_66122813	Pig.00251	0.056323	-4.15013	0.00831063	0.0488758	yes	down	0.0503312	0.0306722	0.074336	0	0.0163877	0	0.0517798	0.00546255	ACVR1-202	PREDICTED: activin receptor type-1 isoform X1 [Pteropus alecto]	XP_023398704.1
Chr15_67354880_67355080	Pig.00246	0.26388	-1.92204	0.0288409	0.121496	yes	down	0.0377484	0.0690125	0.0309733	0.0177063	0.049163	0	0.0459114	0.0222898	TANC1-202	protein TANC1 isoform X1 [Sus scrofa]	XP_020930418.1
Chr15_67621405_67628331	Pig.00244	3.42047	1.77419	4.88913e-05	0.000892362	yes	up	0.0943709	0.0613444	0.105309	0.593162	0.434273	0.627487	0.0870082	0.551641	BAZ2B-201	PREDICTED: bromodomain adjacent to zinc finger domain protein 2B isoform X4 [Ceratotherium simum simum]	XP_020930417.1
Chr15_6770057_6775241		59.4822	5.89439	0.00217452	0.0174823	yes	up	0	0	0	0.132798	0.188458	0.0883784	0	0.136545	#N/A	#N/A	#N/A
Chr15_72574920_72578797	MSTRG.36725	0.006749	-7.21111	9.54498e-05	0.00154639	yes	down	0.257947	0	0.130088	0	0	0	0.129345	0	0	0	XP_008972652.2
Chr15_72574920_72611569	MSTRG.36725	0.0140645	-6.15179	1.32898e-05	0.000326564	yes	down	0.0943709	0.0460083	0.0433627	0	0	0	0.0612473	0	0	0	XP_008972652.2
Chr15_76012998_76035026	Pig.00205	25.4907	4.6719	0.0162086	1	yes	up	0	0	0	0.0708254	0.0573568	0.0441892	0	0.0574571	STK39-201	STE20/SPS1-related proline-alanine-rich protein kinase [Sus scrofa]	XP_003133502.3
Chr15_7657321_7662795	MSTRG.36092,Pig.04241	8.44314	3.07778	0.0320558	0.131814	yes	up	0.0125828	0	0	0.0265595	0.0737444	0.106054	0.00419426	0.068786	#N/A	#N/A	#N/A
Chr15_77516142_77519536	Pig.00190	6.25448	2.64489	0.0441929	0.166653	yes	up	0.0125828	0	0	0.0796785	0.0327753	0.0353514	0.00419426	0.0492684	UBR3-203	LOW QUALITY PROTEIN: E3 ubiquitin-protein ligase UBR3 [Sus scrofa]	XP_020932162.1
Chr15_77541444_77547742	Pig.00190	8.77923	3.1341	0.00385134	0.0272908	yes	up	0	0	0.018584	0.141651	0.114714	0.0618649	0.00619467	0.106076	UBR3-203	LOW QUALITY PROTEIN: E3 ubiquitin-protein ligase UBR3 [Sus scrofa]	XP_020932162.1
Chr15_78603808_78637426	Pig.00183	0.440753	-1.18196	0.00247932	0.0192226	yes	down	0.383775	0.398739	0.235397	0.230182	0.319559	0.282811	0.339304	0.277518	TLK1-201	serine/threonine-protein kinase tousled-like 1 isoform X1 [Sus scrofa]	XP_001927925.1
Chr15_79969948_79977134	Pig.00171	4.91305	2.29662	0.0415956	0.159224	yes	up	0.0188742	0	0	0.053119	0.0901321	0.0353514	0.00629139	0.0595342	PDK1-202	pyruvate dehydrogenase (acetyl-transferring) kinase isozyme 1, mitochondrial [Sus scrofa]	NP_001153080.1
Chr15_862299_892728	Pig.04215	21.183	4.40484	0.0311275	0.128866	yes	up	0	0	0	0.0354127	0.114714	0	0	0.0500421	RIF1-201	telomere-associated protein RIF1 isoform X1 [Sus scrofa]	XP_003359765.2
Chr15_88804975_88805439	Pig.00119	0.0151216	-6.04724	2.03576e-05	0.000443069	yes	down	0.0692053	0.0383403	0.0619467	0	0	0	0.0564974	0	ITPRID2-202	sperm-specific antigen 2 isoform X1 [Sus scrofa]	XP_020931795.1
Chr15_89874611_89878935	Pig.00114	17.6563	4.14211	0.00297381	0.0222634	yes	up	0	0	0	0.0442659	0.0409691	0.0353514	0	0.0401955	NCKAP1-201	nck-associated protein 1 isoform X1 [Sus scrofa]	XP_003359630.1
Chr15_95030211_95032207	MSTRG.37007,Pig.00100	16.148	4.01328	0.0468981	0.173631	yes	up	0	0	0	0.0354127	0.049163	0.0265135	0	0.0370297	#N/A	#N/A	#N/A
Chr15_96711870_96728010	Pig.00081	11.8345	3.56493	0.046342	0.172411	yes	up	0	0	0	0	0.049163	0.0353514	0	0.0281714	NAB1	NGFI-A-binding protein 1 isoform X1 [Sus scrofa]	XP_020931714.1
Chr16_10658431_10665832	Pig.12529	0.333523	-1.58414	7.08623e-05	0.00123381	yes	down	0.320861	0.260714	0.229203	0.115091	0.122907	0.265135	0.270259	0.167711	FAM114A2-202	PREDICTED: protein FAM114A2 isoform X2 [Tursiops truncatus]	XP_013840357.2
Chr16_15371403_15432891	Pig.04581	66.1021	6.04663	0.00195874	0.0161305	yes	up	0	0	0	0.141651	0.122907	0.185595	0	0.150051	EBF1-201	transcription factor COE1 [Bos taurus]	NP_001179845.1
Chr16_28904053_28913536	Pig.04523	15.5019	3.95438	0.0376703	1	yes	up	0	0	0	0.0354127	0.0163877	0.053027	0	0.0349425	CREBRF-201	CREB3 regulatory factor isoform X1 [Sus scrofa]	XP_005657688.1
Chr16_32443001_32449725	Pig.01119	37.0272	5.21051	0.00347887	0.0252986	yes	up	0	0	0	0.0265595	0.139295	0.0972162	0	0.0876903	BDP1-201	transcription factor TFIIIB component B'' homolog isoform X1 [Sus scrofa]	XP_005672583.2
Chr16_32614258_32623132	Pig.01123	0.0317992	-4.97487	0.0315213	1	yes	down	0.0251656	0.0306722	0.0247787	0	0	0	0.0268722	0	OCLN-201	occludin isoform X1 [Sus scrofa]	XP_005672578.1
Chr16_32642418_32651383		0.0287163	-5.12198	0.0123229	1	yes	down	0.031457	0.0460083	0.0123893	0	0	0	0.0299515	0	#N/A	#N/A	#N/A
Chr16_33788658_33796723	Pig.01133	6.46772	2.69326	0.0446764	0.16744	yes	up	0	0	0.0123893	0.0354127	0.0901321	0.0353514	0.00412978	0.053632	PIK3R1-201	phosphatidylinositol 3-kinase regulatory subunit alpha isoform X1 [Sus scrofa]	XP_020932506.1
Chr16_35124825_35153335	Pig.01137	14.0878	3.81637	0.025244	0.111315	yes	up	0	0	0	0	0.0655506	0.0353514	0	0.033634	MAST4-201	microtubule-associated serine/threonine-protein kinase 4 isoform X1 [Sus scrofa]	XP_020932413.1
Chr16_44254032_44255678	Pig.01173	8.34825	3.06147	0.021357	0.100579	yes	up	0	0	0.0123893	0.0354127	0.139295	0.0353514	0.00412978	0.0700197	MIER3-201	mesoderm induction early response protein 3 isoform X1 [Sus scrofa]	XP_013840248.1
Chr16_53671468_53694230	Pig.01244,MSTRG.38604	164.391	7.36099	6.91148e-08	4.04986e-06	yes	up	0	0	0	0.327567	0.38511	0.415378	0	0.376019	#N/A	#N/A	#N/A
Chr16_53671468_53741947	Pig.01244,MSTRG.38604	104.824	6.71182	1.12201e-05	0.000287292	yes	up	0	0	0	0.185917	0.131101	0.397703	0	0.23824	#N/A	#N/A	#N/A
Chr16_53729322_53741947	Pig.01244,MSTRG.38604	73.2327	6.19442	1.35041e-06	4.67581e-05	yes	up	0	0	0	0.0885317	0.245815	0.176757	0	0.170368	#N/A	#N/A	#N/A
Chr16_53729322_53776448	Pig.01244,MSTRG.38604	20.7646	4.37605	0.0162007	0.0817276	yes	up	0	0	0	0.0265595	0.0655506	0.053027	0	0.0483791	#N/A	#N/A	#N/A
Chr16_54701604_54707029		17.6615	4.14254	0.00451448	0.0309811	yes	up	0	0	0	0.053119	0.049163	0.0176757	0	0.0399859	#N/A	#N/A	#N/A
Chr16_56515608_56558089	Pig.01261	74.1977	6.2133	1.54698e-06	5.23739e-05	yes	up	0	0	0	0.177063	0.114714	0.212108	0	0.167962	LIFR-205	PREDICTED: leukemia inhibitory factor receptor [Lipotes vexillifer]	XP_007192247.1
Chr16_58703341_58706692	Pig.16455	0.072372	-3.78842	6.83462e-08	4.04986e-06	yes	down	0.138411	0.138025	0.111504	0.0177063	0	0.0353514	0.129313	0.0176859	Nadk2	NAD kinase 2, mitochondrial isoform X1 [Sus scrofa]	XP_003359802.2
Chr16_58703341_58719462	Pig.16455	0.0374995	-4.73698	3.96824e-08	2.5726e-06	yes	down	0.163576	0.161029	0.179645	0.0354127	0	0	0.168084	0.0118042	Nadk2	NAD kinase 2, mitochondrial isoform X1 [Sus scrofa]	XP_003359802.2
Chr16_58703341_58724322	Pig.16455	0.0121699	-6.36054	2.37841e-06	7.70959e-05	yes	down	0.0880795	0.0613444	0.0619467	0	0	0	0.0704569	0	Nadk2	NAD kinase 2, mitochondrial isoform X1 [Sus scrofa]	XP_003359802.2
Chr16_58712794_58719462	Pig.16455	0.0350316	-4.8352	0.0323156	1	yes	down	0.0440398	0.0306722	0	0	0	0	0.024904	0	Nadk2	NAD kinase 2, mitochondrial isoform X1 [Sus scrofa]	XP_003359802.2
Chr16_60541346_60541707	MSTRG.38732	4.8713	2.28431	0.00225642	0.0179045	yes	up	0.0377484	0.0153361	0	0.132798	0.204846	0.141405	0.0176948	0.159683	0	0	XP_020932639.1
Chr16_6840714_6840849		0.0664255	-3.91212	1.92867e-05	0.000425844	yes	down	0.201325	0.0996847	0.0681414	0.0442659	0	0	0.12305	0.0147553	#N/A	#N/A	#N/A
Chr16_6840714_6845508		0.192061	-2.38036	7.99063e-08	4.43994e-06	yes	down	2.73047	2.72983	2.50884	1.60242	0.565374	0.556784	2.65638	0.908194	#N/A	#N/A	#N/A
Chr16_6845373_6845508		0.208996	-2.25845	5.59475e-07	2.30367e-05	yes	down	1.39669	1.78666	1.5115	0.947289	0.442467	0.380027	1.56495	0.589928	#N/A	#N/A	#N/A
Chr16_7674073_7680254	Pig.12551	0.384665	-1.37832	0.0479109	0.176097	yes	down	0.132119	0.0460083	0.0495574	0.0265595	0.0573568	0.0795406	0.075895	0.0544856	MARCH6-201	PREDICTED: E3 ubiquitin-protein ligase MARCH6 isoform X5 [Homo sapiens]	XP_026362479.1
Chr17_12099933_12151084	Pig.13480	0.00744399	-7.06971	4.69625e-07	2.04421e-05	yes	down	0.0692053	0.168697	0.105309	0	0	0	0.114404	0	PSD3-201	PREDICTED: PH and SEC7 domain-containing protein 3 isoform X3 [Ovis aries musimon]	XP_020933648.1
Chr17_12219923_12224684	Pig.13480	0.0211067	-5.56616	3.44539e-14	6.99874e-12	yes	down	0.591391	0.337394	0.37168	0	0.0327753	0.0176757	0.433488	0.016817	PSD3-201	PREDICTED: PH and SEC7 domain-containing protein 3 isoform X3 [Ovis aries musimon]	XP_020933648.1
Chr17_12219923_12243444	Pig.13480	0.0731648	-3.77271	1.28576e-16	3.91772e-14	yes	down	1.01921	0.920166	0.879643	0.16821	0.131101	0.0795406	0.939672	0.126284	PSD3-201	PREDICTED: PH and SEC7 domain-containing protein 3 isoform X3 [Ovis aries musimon]	XP_020933648.1
Chr17_12445125_12457843	Pig.13480	0.0225014	-5.47384	0.0435768	1	yes	down	0.0251656	0.0383403	0.0495574	0	0	0	0.0376877	0	PSD3-201	PREDICTED: PH and SEC7 domain-containing protein 3 isoform X3 [Ovis aries musimon]	XP_020933648.1
Chr17_13394888_13399207	Pig.13496	33.7295	5.07594	0.00893566	0.0518609	yes	up	0	0	0	0.0619722	0.0819383	0.0883784	0	0.0774296	GPCPD1-201	glycerophosphocholine phosphodiesterase GPCPD1 [Sus scrofa]	XP_020933708.1
Chr17_14905710_14912580	Pig.08689	0.0296081	-5.07786	0.00172815	0.0149295	yes	down	0.031457	0.0306722	0.0247787	0	0	0	0.0289693	0	PLCB1-201	1-phosphatidylinositol 4,5-bisphosphate phosphodiesterase beta-1 isoform X2 [Sus scrofa]	XP_020933060.1
Chr17_22340630_22366999	Pig.08668	0.0378023	-4.72538	0.0391011	1	yes	down	0.0251656	0.0306722	0.0123893	0	0	0	0.0227424	0	KIF16B	kinesin-like protein KIF16B isoform X7 [Sus scrofa]	XP_020933706.1
Chr17_27497785_27500088		0.0116066	-6.42891	4.74463e-05	0.000881518	yes	down	0.0377484	0.107353	0.074336	0	0	0	0.0731457	0	#N/A	#N/A	#N/A
Chr17_29660695_29690589	Pig.09491	0.0529802	-4.2384	0.0268146	1	yes	down	0	0.0230042	0.0247787	0	0	0	0.0159276	0	ATRN-201	attractin isoform X1 [Sus scrofa]	XP_001927324.7
Chr17_39518236_39545843	Pig.07402	18.5345	4.21214	0.035693	1	yes	up	0	0	0	0.0265595	0.049163	0.053027	0	0.0429165	RALGAPB-201	PREDICTED: ral GTPase-activating protein subunit beta isoform X1 [Ceratotherium simum simum]	XP_020933792.1
Chr17_4265658_4269739	Pig.08648	0.0241483	-5.37193	0.00432433	0.0300827	yes	down	0.0251656	0.0306722	0.0495574	0	0	0	0.0351317	0	SLC7A2-201	cationic amino acid transporter 2 isoform X1 [Sus scrofa]	XP_020932806.1
Chr17_4449441_4457652	MSTRG.38895	0.0616625	-4.01946	0.0206542	0.0983334	yes	down	0.0754967	0.0306722	0.055752	0.0177063	0	0	0.0539737	0.00590211	0	0	XP_020933654.1
Chr17_4560664_4563512	Pig.08645	0.011675	-6.42043	7.8801e-06	0.000212484	yes	down	0.0817881	0.0766805	0.0619467	0	0	0	0.0734718	0	FGL1-201	fibrinogen-like protein 1 [Sus scrofa]	XP_020933611.1
Chr17_49185401_49188054		56.7308	5.82606	0.000104528	0.00165884	yes	up	0	0	0	0.0619722	0.139295	0.194432	0	0.1319	#N/A	#N/A	#N/A
Chr17_51000006_51005921	Pig.09982	0.29976	-1.73812	0.0293596	0.122948	yes	down	0.0566225	0.0460083	0.0247787	0.0265595	0	0.0441892	0.0424698	0.0235829	NFATC2-201	nuclear factor of activated T-cells, cytoplasmic 2 isoform X1 [Sus scrofa]	XP_005673069.1
Chr17_51129583_51136759	Pig.09983	15.7374	3.97613	0.0313016	0.129236	yes	up	0	0	0	0	0.0409691	0.0707027	0	0.037224	ATP9A-210	probable phospholipid-transporting ATPase IIA [Sus scrofa]	NP_001108144.1
Chr17_51145666_51155075	Pig.09983	13.2238	3.72506	0.0307782	1	yes	up	0	0	0	0.0177063	0.0573568	0.0176757	0	0.0309129	ATP9A-210	probable phospholipid-transporting ATPase IIA [Sus scrofa]	NP_001108144.1
Chr17_56909807_56931936		0.109388	-3.19248	0.0245041	0.109318	yes	down	0.0440398	0.0460083	0	0.0177063	0	0	0.030016	0.00590211	#N/A	#N/A	#N/A
Chr17_56923481_56931936		0.193317	-2.37096	0.00244103	0.018974	yes	down	0.0754967	0.0920166	0.0309733	0.0265595	0	0.0441892	0.0661622	0.0235829	#N/A	#N/A	#N/A
Chr17_57420350_57423480	MSTRG.39954	0.0410409	-4.60679	0.00384789	0.0272908	yes	down	0.0125828	0.0383403	0.0123893	0	0	0	0.0211041	0	0	0	XP_005673120.1
Chr17_7571166_7574449		35.185	5.13689	3.6956e-06	0.00011149	yes	up	0.0251656	0	0	0.318714	0.827577	0.565622	0.00838853	0.570638	#N/A	#N/A	#N/A
Chr18_10122395_10127310	Pig.17909	0.0325234	-4.94238	0.00131097	0.012068	yes	down	0.0377484	0.0230042	0.018584	0	0	0	0.0264455	0	PARP12-201	poly [ADP-ribose]	XP_003134663.1
Chr18_10447163_10448250	Pig.17905	0.476579	-1.06921	1.49079e-05	0.000355863	yes	down	0.880795	1.15021	0.786723	0.513484	1.21269	0.804243	0.939242	0.843471	HIPK2-201	homeodomain-interacting protein kinase 2 isoform X1 [Sus scrofa]	XP_020934209.1
Chr18_10736400_10765303	Pig.17902	0.12484	-3.00185	0.00387255	0.0273774	yes	down	0.0188742	0.0536764	0.074336	0.0177063	0.0163877	0	0.0489622	0.0113647	FMC1-LUC7L2-201	putative RNA-binding protein Luc7-like 2 isoform X2 [Sus scrofa]	XP_013846229.1
Chr18_11837452_11867871	MSTRG.40295	0.0067259	-7.21606	6.5972e-08	4.02033e-06	yes	down	0.176159	0.115021	0.09292	0	0	0	0.128033	0	0	0	XP_020934349.1
Chr18_11844787_11867871	MSTRG.40295,Pig.01268	0.0143218	-6.12565	3.36741e-05	0.000671525	yes	down	0.0754967	0.0613444	0.0433627	0	0	0	0.0600679	0	#N/A	#N/A	#N/A
Chr18_11856641_11867871	MSTRG.40295,Pig.01268	0.00698861	-7.16078	2.33274e-11	2.3481e-09	yes	down	0.515894	0.345062	0.470795	0.0177063	0	0	0.443917	0.00590211	#N/A	#N/A	#N/A
Chr18_12048850_12062657	Pig.01269	0.203863	-2.29433	0.0202037	0.0970071	yes	down	0.0440398	0.0920166	0.09292	0.0265595	0.0163877	0.0441892	0.0763255	0.0290455	CREB3L2-202	cyclic AMP-responsive element-binding protein 3-like protein 2 [Sus scrofa]	XP_003134683.1
Chr18_1623407_1641276	MSTRG.40019	0.119874	-3.06041	0.0402515	0.155642	yes	down	0.0251656	0.0306722	0.018584	0	0.0163877	0	0.0248073	0.00546255	0	0	XP_020934929.1
Chr18_16995706_17017904		0.0214954	-5.53983	0.0105552	0.0583699	yes	down	0.0188742	0.0306722	0.0681414	0	0	0	0.0392292	0	#N/A	#N/A	#N/A
Chr18_2037034_2043252	Pig.15539	0.138662	-2.85036	0.0186963	0.0912944	yes	down	0.0440398	0.0536764	0.037168	0	0	0.0353514	0.0449614	0.0117838	LMBR1-201	limb region 1 protein homolog isoform X1 [Sus scrofa]	XP_020934816.1
Chr18_2812373_2818304	Pig.15536	0.259796	-1.94455	0.00906365	0.0522059	yes	down	0.0440398	0.0690125	0.0495574	0.0265595	0.0163877	0.0353514	0.0542032	0.0260995	Rbm33	LOW QUALITY PROTEIN: RNA-binding protein 33 [Sus scrofa]	XP_020934696.1
Chr18_2812373_2825012	Pig.15536	0.278623	-1.84361	2.62762e-05	0.000555997	yes	down	0.157285	0.214705	0.148672	0.0796785	0.0655506	0.12373	0.173554	0.089653	Rbm33	LOW QUALITY PROTEIN: RNA-binding protein 33 [Sus scrofa]	XP_020934696.1
Chr18_31666003_31666275	Pig.01383	4.59959	2.20151	0.000980542	0.00989308	yes	up	0.0377484	0.0153361	0.0123893	0.239036	0.155683	0.159081	0.0218246	0.1846	MDFIC-201	myoD family inhibitor domain-containing protein isoform X1 [Sus scrofa]	XP_003134810.3
Chr18_31666003_31703354	Pig.01383	10.9525	3.45319	5.34947e-18	2.03748e-15	yes	up	0.0566225	0.0460083	0.0681414	0.885317	1.25366	1.38754	0.0569241	1.1755	MDFIC-201	myoD family inhibitor domain-containing protein isoform X1 [Sus scrofa]	XP_003134810.3
Chr18_38971782_38985420	Pig.07046	9.17687	3.198	0.00566344	0.0367943	yes	up	0	0	0.0123893	0.053119	0.0409691	0.132568	0.00412978	0.0755519	HERPUD2-202	PREDICTED: homocysteine-responsive endoplasmic reticulum-resident ubiquitin-like domain member 2 protein [Canis lupus familiaris]	XP_020934290.1
Chr18_38974154_38985420	Pig.07046	3.6325	1.86096	0.0214425	0.100783	yes	up	0.0188742	0	0.018584	0.0619722	0.0983259	0.106054	0.0124861	0.0887841	HERPUD2-202	PREDICTED: homocysteine-responsive endoplasmic reticulum-resident ubiquitin-like domain member 2 protein [Canis lupus familiaris]	XP_020934290.1
Chr18_39482693_39491259	Pig.07049	15.3136	3.93674	0.0122526	0.0656129	yes	up	0	0	0	0.0265595	0.0163877	0.0618649	0	0.0349373	DPY19L2-201	probable C-mannosyltransferase DPY19L1 [Sus scrofa]	XP_020934968.1
Chr18_40827685_40851102	Pig.07053	22.6489	4.50137	0.0248881	1	yes	up	0	0	0	0.0442659	0.049163	0.0618649	0	0.0517646	BBS9-201	protein PTHB1 isoform X1 [Sus scrofa]	XP_020934986.1
Chr18_43306041_43341966		0.0355183	-4.81529	0.00234938	0.0184976	yes	down	0.0188742	0.0153361	0.037168	0	0	0	0.0237928	0	#N/A	#N/A	#N/A
Chr18_44072031_44078588	Pig.07088	0.0172485	-5.85738	0.000293058	0.00378367	yes	down	0.0440398	0.0613444	0.0433627	0	0	0	0.0495823	0	CHN2	beta-chimaerin isoform X3 [Sus scrofa]	XP_003484098.1
Chr18_44072031_44102682	Pig.07088	0.0327361	-4.93297	0.0385392	1	yes	down	0.0251656	0.0536764	0	0	0	0	0.0262806	0	CHN2	beta-chimaerin isoform X3 [Sus scrofa]	XP_003484098.1
Chr18_45729590_45744165	Pig.07095	0.353639	-1.49965	1.68015e-05	0.000384918	yes	down	0.553643	0.636448	0.613272	0.486924	0.376916	0.309324	0.601121	0.391055	HIBADH-202	3-hydroxyisobutyrate dehydrogenase, mitochondrial [Sus scrofa]	XP_020934876.1
Chr18_45729590_45748565	Pig.07095	0.0387416	-4.68997	0.00672616	1	yes	down	0.031457	0.0230042	0.0123893	0	0	0	0.0222835	0	HIBADH-202	3-hydroxyisobutyrate dehydrogenase, mitochondrial [Sus scrofa]	XP_020934876.1
Chr18_45729590_45754366	Pig.07095	0.112508	-3.15191	9.63312e-14	1.72659e-11	yes	down	0.31457	0.260714	0.408848	0.0796785	0.0737444	0.053027	0.328044	0.0688167	HIBADH-202	3-hydroxyisobutyrate dehydrogenase, mitochondrial [Sus scrofa]	XP_020934876.1
Chr18_45741454_45754366	Pig.07095	0.0397213	-4.65394	0.0297123	0.123848	yes	down	0.0377484	0.0153361	0.0123893	0	0	0	0.0218246	0	HIBADH-202	3-hydroxyisobutyrate dehydrogenase, mitochondrial [Sus scrofa]	XP_020934876.1
Chr18_48365250_48392464		0.0224732	-5.47565	0.000520576	0.00598564	yes	down	0.0188742	0.0383403	0.055752	0	0	0	0.0376555	0	#N/A	#N/A	#N/A
Chr18_49965466_49966837	Pig.15666	0.158691	-2.65571	1.15708e-05	0.000293801	yes	down	0.176159	0.138025	0.130088	0.0354127	0.0163877	0.0795406	0.148091	0.0437803	TNS3-201	tensin-3 isoform X4 [Sus scrofa]	XP_020935014.1
Chr18_53610429_53620130	Pig.15553	7.45502	2.89821	0.00018038	0.00261722	yes	up	0.0188742	0.0230042	0	0.177063	0.147489	0.229784	0.0139594	0.184779	GLI3-201	transcriptional activator GLI3 isoform X2 [Sus scrofa]	XP_020934602.1
Chr18_5582965_5586363	Pig.13668	13.2034	3.72283	0.042436	1	yes	up	0	0	0	0.0619722	0.0245815	0	0	0.0288512	KMT2C-201	histone-lysine N-methyltransferase 2C isoform X1 [Sus scrofa]	XP_020934780.1
Chr18_8209939_8214109	Pig.13571	0.0236202	-5.40383	0.0133199	0.0707071	yes	down	0.031457	0.0460083	0.0309733	0	0	0	0.0361462	0	MGAM2-201	putative maltase-glucoamylase-like protein FLJ16351 isoform X1 [Sus scrofa]	XP_020934752.1
ChrX_110843981_110863166	Pig.04472	0.0181023	-5.78769	0.000154838	0.00227918	yes	down	0.0629139	0.0230042	0.055752	0	0	0	0.0472234	0	MBNL3-201	muscleblind-like protein 3 isoform X1 [Sus scrofa]	XP_013841883.1
ChrX_112081522_112082216	Pig.04476	0.0237891	-5.39356	0.00242007	0.0189075	yes	down	0.0188742	0.0383403	0.0495574	0	0	0	0.0355906	0	GPC3-201	glypican-3 [Sus scrofa]	XP_013841903.2
ChrX_112727741_112741438	Pig.04480	0.110619	-3.17634	5.00605e-05	0.00090131	yes	down	0.163576	0.0843486	0.142477	0.0619722	0.0163877	0	0.130134	0.02612	HPRT1-201	hypoxanthine-guanine phosphoribosyltransferase isoform X1 [Sus scrofa]	XP_020935162.1
ChrX_11445105_11457569	Pig.06016	26.4114	4.72309	0.00055672	0.00625951	yes	up	0	0	0	0.053119	0.0573568	0.0707027	0	0.0603928	WWC3-201	protein WWC3 [Sus scrofa]	XP_013841331.2
ChrX_116987066_116992029	Pig.08395	0.0680644	-3.87696	0.0350392	1	yes	down	0.0251656	0	0.0123893	0	0	0	0.0125183	0	ATP11C-201	phospholipid-transporting ATPase IG isoform X1 [Sus scrofa]	XP_020935853.1
ChrX_117725135_117726758	MSTRG.42462	13.5907	3.76454	1.79945e-18	7.83273e-16	yes	up	0.132119	0.107353	0.167256	2.39036	3.57251	4.45427	0.135576	3.47238	0	0	TKC34226.1
ChrX_117725135_117785162	MSTRG.42462	9.83041	3.29725	0.0273975	0.117421	yes	up	0.0188742	0.0153361	0	0.0885317	0.245815	0.291649	0.0114034	0.208665	0	0	TKC34226.1
ChrX_127871530_127876414	Pig.18091	22.4797	4.49055	0.0207613	0.0985353	yes	up	0	0	0	0.0796785	0.0245815	0.0441892	0	0.0494831	F8-201	coagulation factor VIII precursor [Sus scrofa]	NP_999332.2
ChrX_16539567_16566142	Pig.05990	17.6769	4.14379	0.0273995	0.117421	yes	up	0	0	0	0.0708254	0	0.0441892	0	0.0383382	PIR-201	pirin [Sus scrofa]	XP_003134991.1
ChrX_18117973_18122552	Pig.05975	0.0257827	-5.27745	0.00350999	0.0254641	yes	down	0.031457	0.0306722	0.037168	0	0	0	0.0330991	0	REPS2-201	ralBP1-associated Eps domain-containing protein 2 isoform X1 [Sus scrofa]	XP_020936433.1
ChrX_21043378_21065144	Pig.01775	18.5545	4.2137	0.0315906	1	yes	up	0	0	0	0	0.0901321	0.0441892	0	0.0447738	RPS6KA3-201	ribosomal protein S6 kinase alpha-3 isoform 1 [Mus musculus]	EDL40821.1
ChrX_21050389_21065144	Pig.01775	17.4699	4.1268	0.000313119	0.00399195	yes	up	0.0125828	0	0	0.106238	0.155683	0.167919	0.00419426	0.14328	RPS6KA3-201	ribosomal protein S6 kinase alpha-3 isoform 1 [Mus musculus]	EDL40821.1
ChrX_24791587_24795340		0.380915	-1.39246	0.000407517	0.00486943	yes	down	0.150993	0.122689	0.148672	0.0708254	0.10652	0.12373	0.140785	0.100358	#N/A	#N/A	#N/A
ChrX_32827680_32872783	Pig.01823	48.4852	5.59947	0.000542276	0.00615555	yes	up	0	0	0	0.0973849	0.0737444	0.159081	0	0.11007	DMD-205	dystrophin isoform X1 [Sus scrofa]	XP_020935207.1
ChrX_32984351_33033861	Pig.01823	38.9773	5.28456	0.00412451	0.0289571	yes	up	0	0	0	0.132798	0.0737444	0.053027	0	0.086523	DMD-205	dystrophin isoform X1 [Sus scrofa]	XP_020935207.1
ChrX_45213981_45219005	MSTRG.41530	0.0102062	-6.61441	5.02864e-05	0.00090131	yes	down	0.113245	0.0843486	0.055752	0	0	0	0.0844486	0	0	0	XP_020922221.1
ChrX_46539319_46555957	Pig.09861	0.0235216	-5.40987	0.0421311	0.160266	yes	down	0.0125828	0.0766805	0.018584	0	0	0	0.0359491	0	ZNF41-201	LOW QUALITY PROTEIN: zinc finger protein 41 [Sus scrofa]	XP_020936043.1
ChrX_52315117_52332491	Pig.11763	22.3222	4.48041	0.0229357	0.104898	yes	up	0	0	0	0.0442659	0.0655506	0.0441892	0	0.0513352	Arhgef9	rho guanine nucleotide exchange factor 9 isoform X1 [Sus scrofa]	XP_020936292.1
ChrX_62102278_62119005	Pig.10449	0.134455	-2.8948	0.0470831	0.173894	yes	down	0.0440398	0	0.0247787	0	0	0.0176757	0.0229395	0.00589189	ABCB7-201	ATP-binding cassette sub-family B member 7, mitochondrial isoform X1 [Sus scrofa]	XP_001928754.2
ChrX_63391855_63406228	Pig.10458	2.35724	1.2371	0.0323989	0.132687	yes	up	0.031457	0.0306722	0.0619467	0.19477	0.139295	0.212108	0.0413586	0.182058	ATRX-201	transcriptional regulator ATRX isoform X1 [Sus scrofa]	XP_020935739.1
ChrX_69088121_69130214	Pig.06669	0.117738	-3.08635	0.0233146	0.105871	yes	down	0.0251656	0.0383403	0.018584	0.0177063	0	0	0.0273633	0.00590211	RPS6KA6-201	ribosomal protein S6 kinase alpha-6 isoform X1 [Sus scrofa]	XP_005657901.1
Scaffold109_2537105_2542457	MSTRG.42720,Pig.10028	15.2293	3.92878	0.00572341	0.037031	yes	up	0	0	0	0.0442659	0.0327753	0.0265135	0	0.0345182	#N/A	#N/A	#N/A
Scaffold109_3251924_3252389	Pig.10031	0.0237442	-5.39628	0.000106586	0.00166548	yes	down	0.0251656	0.0460083	0.037168	0	0	0	0.036114	0	OXNAD1-201	oxidoreductase NAD-binding domain-containing protein 1 isoform X1 [Sus scrofa]	XP_001925335.4
Scaffold109_3844407_3854262	MSTRG.42741,MSTRG.42740,Pig.10036	0.257808	-1.95563	0.0489063	0.178464	yes	down	0.0754967	0.0306722	0.0247787	0.0442659	0.0163877	0	0.0436492	0.0202178	#N/A	#N/A	#N/A
Scaffold109_5210237_5213556	Pig.10048	26.3113	4.71761	0.0020691	0.0168121	yes	up	0	0	0	0.0354127	0.049163	0.0972162	0	0.0605973	ATP2C1-205	calcium-transporting ATPase type 2C member 1 [Bos taurus]	XP_010799920.1
Scaffold118_1738308_1756270	Pig.10801	11.7696	3.557	0.0404861	1	yes	up	0	0	0	0.0442659	0.0163877	0.0176757	0	0.0261097	RUNX1T1-202	PREDICTED: protein CBFA2T1 isoform X2 [Otolemur garnettii]	XP_019480529.1
Scaffold118_6020664_6039588		2.81665	1.49398	0.00193769	0.0160439	yes	up	0.031457	0.0383403	0.0619467	0.283301	0.229427	0.176757	0.0439146	0.229828	#N/A	#N/A	#N/A
Scaffold124_5105139_5113215	Pig.11268	4.73309	2.24278	0.00778614	0.0466098	yes	up	0.0251656	0.0690125	0	0.292155	0.17207	0.327	0.0313927	0.263742	TET1-201	methylcytosine dioxygenase TET1 [Sus scrofa]	NP_001302701.1
Scaffold155_1720718_1743617	Pig.12788	2.90596	1.53901	0.0411439	0.15809	yes	up	0	0.0460083	0.0123893	0.115091	0.0655506	0.114892	0.0194659	0.0985113	UBP1-202	upstream-binding protein 1 isoform X1 [Sus scrofa]	XP_003132142.5
Scaffold155_2126498_2131936	Pig.12790	13.9312	3.80025	0.0233523	0.105885	yes	up	0	0	0	0.0177063	0.0163877	0.0618649	0	0.0319863	PDCD6IP	programmed cell death 6-interacting protein isoform X1 [Sus scrofa]	XP_020927280.1
Scaffold155_4251629_4267749	MSTRG.43205,Pig.12793	0.0514927	-4.27949	0.0473583	1	yes	down	0	0.0306722	0.018584	0	0	0	0.0164187	0	#N/A	#N/A	#N/A
Scaffold155_4805140_4828350	Pig.12801	0.0373236	-4.74377	0.0255965	0.112381	yes	down	0.031457	0	0.037168	0	0	0	0.022875	0	ITGA9-201	integrin alpha-9 isoform X2 [Sus scrofa]	XP_020927318.1
Scaffold155_4811844_4813386	Pig.12801	0.0615194	-4.02281	0.0223733	0.103604	yes	down	0	0.0230042	0.018584	0	0	0	0.0138627	0	ITGA9-201	integrin alpha-9 isoform X2 [Sus scrofa]	XP_020927318.1
Scaffold155_4811844_4828350	Pig.12801	0.0137851	-6.18075	1.55872e-15	3.95785e-13	yes	down	0.352318	0.421743	0.84867	0	0.0409691	0	0.54091	0.0136564	ITGA9-201	integrin alpha-9 isoform X2 [Sus scrofa]	XP_020927318.1
Scaffold155_4811844_4846127	Pig.12801	0.0329102	-4.92532	0.00345363	0.0252355	yes	down	0.031457	0.0153361	0.0309733	0	0	0	0.0259221	0	ITGA9-201	integrin alpha-9 isoform X2 [Sus scrofa]	XP_020927318.1
Scaffold155_4811844_4891253	Pig.12801	0.0281823	-5.14907	0.00172961	0.0149295	yes	down	0.0125828	0.0536764	0.0247787	0	0	0	0.0303459	0	ITGA9-201	integrin alpha-9 isoform X2 [Sus scrofa]	XP_020927318.1
Scaffold155_4873178_4891253	Pig.12801	0.0710417	-3.81519	0.000699409	0.00753038	yes	down	0.125828	0.0843486	0.0681414	0.0354127	0	0	0.0927726	0.0118042	ITGA9-201	integrin alpha-9 isoform X2 [Sus scrofa]	XP_020927318.1
Scaffold155_4876418_4891253	Pig.12801	0.0212567	-5.55594	0.0109734	1	yes	down	0.0440398	0.0460083	0.0309733	0	0	0	0.0403405	0	ITGA9-201	integrin alpha-9 isoform X2 [Sus scrofa]	XP_020927318.1
Scaffold158_4279284_4282928	Pig.12978	0.0110897	-6.49464	9.91029e-07	3.68252e-05	yes	down	0.113245	0.0306722	0.0867254	0	0	0	0.0768809	0	C5-203	complement C5a anaphylatoxin precursor [Sus scrofa]	NP_001001646.1
Scaffold158_4338278_4344658	Pig.12978	0.0339035	-4.88242	0.0350027	0.140518	yes	down	0	0.0306722	0.0433627	0	0	0	0.0246783	0	C5-203	complement C5a anaphylatoxin precursor [Sus scrofa]	NP_001001646.1
Scaffold164_242738_242993	MSTRG.43279	0.0639204	-3.96758	0.0138029	0.0726067	yes	down	0.0125828	0.0153361	0.0123893	0	0	0	0.0134361	0	0	0	XP_020927024.1
Scaffold180_2562774_2570664	Pig.13867	0.312318	-1.67891	7.65747e-07	3.11097e-05	yes	down	1.18278	0.874158	1.26371	0.354127	0.680088	0.919135	1.10688	0.651117	PFKFB1-201	6-phosphofructo-2-kinase/fructose-2,6-bisphosphatase 1 isoform X2 [Sus scrofa]	XP_005673720.1
Scaffold249_2002906_2003964		0.361434	-1.4682	0.0423954	0.161071	yes	down	0.125828	0.130357	0.055752	0.0796785	0.0737444	0.053027	0.103979	0.0688167	#N/A	#N/A	#N/A
Scaffold249_295163_295708	Pig.16592	3.11406	1.6388	0.00214264	0.0172715	yes	up	0.0377484	0.0613444	0.037168	0.265595	0.262202	0.24746	0.0454203	0.258419	IGF1R-201	insulin-like growth factor 1 receptor isoform X1 [Sus scrofa]	XP_020938574.1
Scaffold267_2060064_2061371	Pig.17347,MSTRG.43903	0.0100314	-6.63933	8.8839e-07	3.45174e-05	yes	down	0.0880795	0.0613444	0.105309	0	0	0	0.0849111	0	#N/A	#N/A	#N/A
Scaffold288_845822_855512	Pig.17809	0.18146	-2.46228	9.79988e-07	3.68252e-05	yes	down	0.213907	0.122689	0.216813	0.053119	0.0901321	0.0441892	0.18447	0.0624801	LAPTM4B-202	lysosomal-associated transmembrane protein 4B [Sus scrofa]	XP_005655413.3
Scaffold288_850448_855512	Pig.17809	0.497907	-1.00605	0.0404339	0.15615	yes	down	0.100662	0.0536764	0.105309	0.0973849	0.0737444	0.0707027	0.0865493	0.0806107	LAPTM4B-202	lysosomal-associated transmembrane protein 4B [Sus scrofa]	XP_005655413.3
Scaffold3265_5751_23150		321.67	8.32944	0.00778159	0.0466098	yes	up	0	0	0	1.18632	0.573568	0.362351	0	0.707415	#N/A	#N/A	#N/A
Scaffold355_403360_409180	Pig.19337	2.78335	1.47682	0.00472579	0.0320701	yes	up	0	0.0536764	0.0681414	0.239036	0.254009	0.132568	0.0406059	0.208537	SCMH1-201	polycomb protein SCMH1 isoform X1 [Sus scrofa]	XP_020952602.1
Scaffold419_211548_224712	Pig.20268	0.0564628	-4.14655	0.0366334	1	yes	down	0	0.0460083	0	0	0	0	0.0153361	0	RNF216-201	E3 ubiquitin-protein ligase RNF216 isoform X2 [Sus scrofa]	XP_020941708.1
Scaffold4454_90_254	MSTRG.44768	100.018	6.64411	0.0368559	0.145466	yes	up	0	0	0	0.301008	0.10652	0.256297	0	0.221275	0	0	AMB36376.1

## Sheet: N30_F vs N210D_F_DEcircRNAs
circRNA id	Host gene id	FC(N210D_F/N30D_F)	Log2FC(N210D_F/N30D_F)	Pvalue	Padjust	Significant	Regulate	N30D_F1	N30D_F2	N30D_F3	N210D_F1	N210D_F2	N210D_F3	N30D_F	N210D_F	gene_name	description	nr_hit_name
Chr01_103594729_103605128		14.4833	3.85632	0.0250463	0.109966	yes	up	0.0188742	0	0	0.122721	0.0866257	0.0672489	0.00629139	0.0921986	#N/A	#N/A	#N/A
Chr01_117404517_117413201	Pig.03400	0.0549472	-4.18581	0.0064536	0.0443885	yes	down	0.0377484	0	0.0309733	0	0	0	0.0229072	0	CLPX-201	ATP-dependent Clp protease ATP-binding subunit clpX-like, mitochondrial isoform X1 [Sus scrofa]	XP_020955740.1
Chr01_11866852_11881695	Pig.03854	0.0423363	-4.56196	0.0245184	1	yes	down	0.0125828	0.0460083	0.0309733	0	0	0	0.0298548	0	ERP44-201	endoplasmic reticulum resident protein 44 precursor [Sus scrofa]	NP_001131101.1
Chr01_1187216_1191546	Pig.03783	0.110412	-3.17903	3.18065e-06	0.000119647	yes	down	0.125828	0.214705	0.167256	0	0.036094	0.0224163	0.169263	0.0195034	DNAJC25-201	dnaJ homolog subfamily C member 25 [Sus scrofa]	XP_020923138.1
Chr01_123269900_123306601	Pig.10767	0.173219	-2.52933	0.041353	0.157337	yes	down	0.031457	0.0383403	0.0123893	0	0	0.0149442	0.0273955	0.0049814	SPRED1-201	sprouty-related, EVH1 domain-containing protein 1 isoform X1 [Sus scrofa]	XP_003121670.3
Chr01_125984752_125993885	Pig.10734	0.0366401	-4.77043	0.011045	0.0632597	yes	down	0.0125828	0.0536764	0.037168	0	0	0	0.0344757	0	INO80-201	DNA helicase INO80 [Sus scrofa]	XP_003121636.1
Chr01_127279986_127292153	Pig.14349	18.4871	4.20845	0.0101418	0.0594272	yes	up	0	0	0	0.0322951	0.0144376	0.0224163	0	0.0230497	ZNF106-201	zinc finger protein 106 isoform X1 [Sus scrofa]	XP_005659765.1
Chr01_129539644_129544125	MSTRG.1761,Pig.14306	0.0676761	-3.88521	2.21872e-07	1.37968e-05	yes	down	0.195033	0.222373	0.204424	0	0.0144376	0.0298884	0.207277	0.0147753	#N/A	#N/A	#N/A
Chr01_135021346_135025548	Pig.02305	0.328426	-1.60636	0.0483112	0.172978	yes	down	0.0440398	0.0383403	0.0433627	0.0193771	0	0.0224163	0.0419142	0.0139311	TRPM7-201	transient receptor potential cation channel subfamily M member 7 isoform X1 [Sus scrofa]	XP_023989567.2
Chr01_136392137_136398932	Pig.02292	18.7314	4.22738	0.0309913	1	yes	up	0	0	0	0.0258361	0.0144376	0.0298884	0	0.0233874	TMOD3-201	tropomodulin-3 [Sus scrofa]	NP_999459.1
Chr01_140733143_140759222	Pig.02266	43.4159	5.44015	7.99901e-05	0.00154259	yes	up	0	0	0	0.0452131	0.0577505	0.0597768	0	0.0542468	TEX9-202	testis-expressed sequence 9 protein [Sus scrofa]	NP_001231528.1
Chr01_143206410_143210729	Pig.02254	5.07566	2.34359	4.55448e-21	4.62584e-18	yes	up	0.440398	0.498423	0.27876	2.15731	1.61701	2.45085	0.40586	2.07506	SLTM-201	SAFB-like transcription modulator isoform X2 [Sus scrofa]	XP_020929243.1
Chr01_148180394_148180674	Pig.02225	26.9342	4.75137	0.0246557	1	yes	up	0	0	0	0.0193771	0.0288752	0.0523047	0	0.033519	DAPK2-201	death-associated protein kinase 2 [Sus scrofa]	NP_001230492.1
Chr01_149573571_149585170		0.00866349	-6.85084	0.00716214	0.0474444	yes	down	0.207616	0.176365	0.0619467	0	0	0	0.148643	0	#N/A	#N/A	#N/A
Chr01_149573571_149621592		0.0359477	-4.79796	0.000547049	0.0067212	yes	down	0.0440398	0.0383403	0.0247787	0	0	0	0.0357196	0	#N/A	#N/A	#N/A
Chr01_149573571_149644642		0.0302694	-5.046	0.000372073	0.0049724	yes	down	0.031457	0.0383403	0.055752	0	0	0	0.0418497	0	#N/A	#N/A	#N/A
Chr01_149643366_149644642		0.0120922	-6.36978	2.51331e-06	0.000100764	yes	down	0.0817881	0.161029	0.074336	0	0	0	0.105718	0	#N/A	#N/A	#N/A
Chr01_150155875_150158392	Pig.02205	2.06198	1.04403	0.00547979	0.0396249	yes	up	0.138411	0.138025	0.123893	0.226066	0.267096	0.343716	0.133443	0.278959	WDR7-201	WD repeat-containing protein 7 isoform X1 [Sus scrofa]	XP_020949254.1
Chr01_151532417_151542472	Pig.02203	56.7026	5.82534	4.10908e-05	0.000907272	yes	up	0	0	0	0.0516721	0.108282	0.0523047	0	0.070753	TCF4-206	transcription factor 4 isoform X1 [Sus scrofa]	XP_020949090.1
Chr01_151532417_151559030	Pig.02203	7.17573	2.84312	0.00304587	0.0263658	yes	up	0.0377484	0	0	0.103344	0.115501	0.0597768	0.0125828	0.092874	TCF4-206	transcription factor 4 isoform X1 [Sus scrofa]	XP_020949090.1
Chr01_162166054_162169510	Pig.08979	17.1295	4.09841	6.78355e-10	5.90556e-08	yes	up	0.0251656	0.0230042	0.0433627	0.490885	0.526973	0.590296	0.0305108	0.536051	SETBP1-201	SET-binding protein isoform X1 [Sus scrofa]	XP_013844009.2
Chr01_176366641_176466186	Pig.00707	32.8341	5.03712	0.00940763	0.0569882	yes	up	0	0	0	0.0645902	0.0288752	0.0298884	0	0.0411179	ME1-201	NADP-dependent malic enzyme [Sus scrofa]	XP_001924368.2
Chr01_176448874_176463214	Pig.00707	76.2216	6.25213	0.00197576	0.0187543	yes	up	0	0	0	0.116262	0.0649693	0.104609	0	0.0952803	ME1-201	NADP-dependent malic enzyme [Sus scrofa]	XP_001924368.2
Chr01_176448874_176466186	Pig.00707	2050.57	11.0018	4.7834e-16	2.08214e-13	yes	up	0	0	0	2.86135	3.299	1.53178	0	2.56404	ME1-201	NADP-dependent malic enzyme [Sus scrofa]	XP_001924368.2
Chr01_176448874_176514079	Pig.00707	45.294	5.50125	0.0304809	0.126132	yes	up	0	0	0	0.0904263	0.0577505	0.0224163	0	0.0568643	ME1-201	NADP-dependent malic enzyme [Sus scrofa]	XP_001924368.2
Chr01_182096958_182103661	Pig.00734	8.50969	3.08911	0.0243235	0.108037	yes	up	0	0.0153361	0	0.0322951	0.0505317	0.0373605	0.00511203	0.0400624	REV3L-201	DNA polymerase zeta catalytic subunit isoform X1 [Sus scrofa]	XP_020946897.1
Chr01_182642754_182716683	Pig.00740	0.191107	-2.38754	0.00796112	0.0505365	yes	down	0.113245	0.0536764	0.055752	0	0.0288752	0.0149442	0.0742245	0.0146065	CDK19-201	PREDICTED: cyclin-dependent kinase 19-like isoform X1 [Elephantulus edwardii]	XP_020946795.1
Chr01_182760362_182767594	Pig.00740	0.341532	-1.54991	0.00906111	0.0556637	yes	down	0.125828	0.0613444	0.0991147	0.0193771	0	0.0821931	0.095429	0.0338567	CDK19-201	PREDICTED: cyclin-dependent kinase 19-like isoform X1 [Elephantulus edwardii]	XP_020946795.1
Chr01_183593543_183598954	Pig.00747	0.05696	-4.13391	0.0253419	0.110784	yes	down	0.0125828	0.0230042	0.0309733	0	0	0	0.0221868	0	FIG4-201	polyphosphoinositide phosphatase isoform X1 [Sus scrofa]	XP_020923736.1
Chr01_207420625_207465177	Pig.00864	0.222591	-2.16753	0.00135723	0.0138775	yes	down	0.446689	0.306722	0.507963	0.116262	0.0866257	0.0821931	0.420458	0.095027	RIMS1-201	regulating synaptic membrane exocytosis protein 1 isoform X9 [Sus scrofa]	XP_020928548.1
Chr01_207420625_207476422	Pig.00864	0.0418484	-4.57868	0.0358242	0.142688	yes	down	0.0377484	0.0230042	0.0309733	0	0	0	0.0305753	0	RIMS1-201	regulating synaptic membrane exocytosis protein 1 isoform X9 [Sus scrofa]	XP_020928548.1
Chr01_214379127_214383038		0.149567	-2.74114	1.70544e-11	2.59823e-09	yes	down	0.635431	0.283718	0.377875	0.0710492	0.0721881	0.0523047	0.432341	0.0651807	#N/A	#N/A	#N/A
Chr01_214380720_214383038		0.0873118	-3.51768	1.28998e-17	6.55096e-15	yes	down	0.836755	0.483087	0.74336	0.0581312	0.0649693	0.0597768	0.687734	0.0609591	#N/A	#N/A	#N/A
Chr01_214381281_214383035		0.176656	-2.50099	0.0139643	0.0745348	yes	down	0.0880795	0.0996847	0.055752	0	0.0144376	0.0298884	0.0811721	0.0147753	#N/A	#N/A	#N/A
Chr01_214381281_214383038		0.264718	-1.91747	0.00175026	0.0170069	yes	down	0.176159	0.138025	0.123893	0.0581312	0.0577505	0	0.146026	0.0386272	#N/A	#N/A	#N/A
Chr01_225334410_225381253	Pig.04000	13.6729	3.77325	0.042334	0.159249	yes	up	0	0	0	0	0.0288752	0.0224163	0	0.0170972	LAMA2	LOW QUALITY PROTEIN: laminin subunit alpha-2 [Sus scrofa]	XP_020940122.1
Chr01_225853573_225876920	Pig.04001	38.3892	5.26263	0.00410807	0.0321781	yes	up	0	0	0	0.0258361	0.0577505	0.0597768	0	0.0477878	ARHGAP18-201	rho GTPase-activating protein 18 isoform X4 [Sus scrofa]	XP_020944089.1
Chr01_225864275_225876920	Pig.04001	25.5613	4.67589	0.00492916	0.0368117	yes	up	0	0	0	0.0516721	0.0216564	0.0224163	0	0.031915	ARHGAP18-201	rho GTPase-activating protein 18 isoform X4 [Sus scrofa]	XP_020944089.1
Chr01_225868396_225876920	Pig.04001	24.4372	4.61101	0.00377388	0.0301021	yes	up	0	0	0	0.0322951	0.0144376	0.0448326	0	0.0305218	ARHGAP18-201	rho GTPase-activating protein 18 isoform X4 [Sus scrofa]	XP_020944089.1
Chr01_228240804_228242964	Pig.04015	0.0167566	-5.89913	1.9025e-05	0.000491264	yes	down	0.0754967	0.0460083	0.105309	0	0	0	0.0756048	0	MOXD1-201	LOW QUALITY PROTEIN: DBH-like monooxygenase protein 1 [Sus scrofa]	XP_001926966.2
Chr01_239086900_239091102	Pig.05196	7.50165	2.90721	0.0419502	0.158392	yes	up	0.0251656	0	0	0.0387541	0.137157	0.0149442	0.00838853	0.0636186	UTRN	utrophin isoform X4 [Sus scrofa]	XP_020927918.1
Chr01_239111391_239126201	Pig.05196	61.209	5.93567	0.000843165	0.00971854	yes	up	0	0	0	0.103344	0.0216564	0.104609	0	0.0765367	UTRN	utrophin isoform X4 [Sus scrofa]	XP_020927918.1
Chr01_239184899_239196493	Pig.05196	41.1655	5.36336	0.00489756	0.0366655	yes	up	0	0	0	0.0645902	0	0.0896652	0	0.0514185	UTRN	utrophin isoform X4 [Sus scrofa]	XP_020927918.1
Chr01_245876855_245917642	Pig.17502	0.0216293	-5.53087	0.00123042	0.0127956	yes	down	0.0440398	0.0383403	0.09292	0	0	0	0.0584333	0	ESR1-201	estrogen receptor isoform X1 [Sus scrofa]	XP_020938661.1
Chr01_245959680_245960754	Pig.17502	0.039817	-4.65047	0.000232534	0.00345896	yes	down	0.106954	0.115021	0.130088	0	0	0.0149442	0.117354	0.0049814	ESR1-201	estrogen receptor isoform X1 [Sus scrofa]	XP_020938661.1
Chr01_250207988_250284542	Pig.09625	0.0264693	-5.23954	0.00010728	0.00198241	yes	down	0.0629139	0.0383403	0.0433627	0	0	0	0.0482056	0	ARID1B-201	AT-rich interactive domain-containing protein 1B isoform X5 [Sus scrofa]	XP_020927546.1
Chr01_250407540_250460068	Pig.09625	0.223998	-2.15845	0.0347989	0.13915	yes	down	0.0629139	0.0153361	0.0433627	0.012918	0.0144376	0	0.0405376	0.00911855	ARID1B-201	AT-rich interactive domain-containing protein 1B isoform X5 [Sus scrofa]	XP_020927546.1
Chr01_250459825_250490265	Pig.09625	0.209922	-2.25208	0.0101035	0.0593166	yes	down	0.0503312	0.0230042	0.0867254	0.0193771	0.0144376	0	0.0533536	0.0112716	ARID1B-201	AT-rich interactive domain-containing protein 1B isoform X5 [Sus scrofa]	XP_020927546.1
Chr01_251561636_251563858		2.86303	1.51754	0.0212196	0.0984112	yes	up	0.0566225	0.0996847	0.018584	0.277738	0.0505317	0.171858	0.0582971	0.166709	#N/A	#N/A	#N/A
Chr01_251787914_251799602	MSTRG.3249,Pig.09636	0.0508054	-4.29887	0.0110705	0.063287	yes	down	0	0.0306722	0.0433627	0	0	0	0.0246783	0	#N/A	#N/A	#N/A
Chr01_253340828_253344572	MSTRG.3284,Pig.09657	0.0201579	-5.63251	0.00295751	0.0256739	yes	down	0	0.0613444	0.123893	0	0	0	0.0617459	0	#N/A	#N/A	#N/A
Chr01_255681370_255681512	MSTRG.3307,Pig.16879	11.6432	3.54142	0.0464249	0.169206	yes	up	0	0	0	0	0.0288752	0.0149442	0	0.0146065	#N/A	#N/A	#N/A
Chr01_25846709_25885179		2.46204	1.29985	0.0138684	0.0745348	yes	up	0.0503312	0.0690125	0.0495574	0.0968853	0.173251	0.149442	0.0563003	0.13986	#N/A	#N/A	#N/A
Chr01_258902156_258922448	Pig.14662	0.0388045	-4.68763	0.00424097	0.0330492	yes	down	0.0503312	0.0306722	0.018584	0	0	0	0.0331958	0	AFDN-201	afadin isoform X5 [Sus scrofa]	XP_020941446.1
Chr01_28732821_28737849		20.4711	4.35551	0.00587144	0.0415088	yes	up	0	0	0	0.0322951	0.0144376	0.0298884	0	0.0255404	#N/A	#N/A	#N/A
Chr01_3467978_3519068	Pig.03801	5.84196	2.54645	0.00100369	0.0110406	yes	up	0.0125828	0.0153361	0.018584	0.12918	0.0866257	0.0597768	0.015501	0.091861	TMEM245-202	transmembrane protein 245 isoform X1 [Sus scrofa]	XP_005660377.1
Chr01_36216621_36217740	Pig.03295	0.190676	-2.3908	0.010163	0.0594371	yes	down	0.100662	0.0613444	0.0247787	0	0.0216564	0.0149442	0.0622618	0.0122002	GLIS3-201	zinc finger protein GLIS3 isoform X1 [Sus scrofa]	XP_020930038.1
Chr01_37908888_37959001	Pig.03277	42.7024	5.41624	0.0109962	1	yes	up	0	0	0	0.0193771	0.0649693	0.074721	0	0.0530224	KIAA2026-201	uncharacterized protein KIAA2026 homolog isoform X1 [Sus scrofa]	XP_003121963.3
Chr01_37930886_37959001	Pig.03277	3.81438	1.93145	0.00115948	0.0122672	yes	up	0.22649	0.0460083	0.148672	0.516721	0.801288	0.306356	0.14039	0.541455	KIAA2026-201	uncharacterized protein KIAA2026 homolog isoform X1 [Sus scrofa]	XP_003121963.3
Chr01_45881287_45948770	Pig.03265	30.8091	4.94529	0.0180612	0.0876315	yes	up	0	0	0	0.0645902	0.0288752	0.0224163	0	0.0386272	NFIB-201	nuclear factor 1 B-type isoform X1 [Odocoileus virginianus texanus]	XP_004276171.1
Chr01_47916059_47918028	Pig.03256	109.761	6.77823	5.00536e-07	2.72345e-05	yes	up	0	0	0	0.161475	0.12272	0.127026	0	0.137074	BNC2-202	zinc finger protein basonuclin-2 isoform X1 [Sus scrofa]	XP_020918949.1
Chr01_5158032_5164452	Pig.03809	2.20788	1.14266	0.00966165	0.0579862	yes	up	0.119536	0.115021	0.0805307	0.219607	0.310409	0.171858	0.105029	0.233958	RAD23B-201	PREDICTED: UV excision repair protein RAD23 homolog B isoform X1 [Pteropus alecto]	XP_001927901.1
Chr01_52123320_52144243		19.27	4.26828	0.0389849	1	yes	up	0	0	0	0.0581312	0.0144376	0	0	0.0241896	#N/A	#N/A	#N/A
Chr01_568863_590789	Pig.03778	0.141607	-2.82004	0.0418533	0.158222	yes	down	0.0754967	0	0.0247787	0	0	0.0149442	0.0334251	0.0049814	PTBP3-202	polypyrimidine tract-binding protein 3 isoform X4 [Sus scrofa]	XP_020939972.1
Chr01_64609502_64632618	Pig.05408	13.9992	3.80728	0.00233085	0.0214565	yes	up	0.0125828	0	0	0.0322951	0.0938445	0.0597768	0.00419426	0.0619721	MNAT1-201	CDK-activating kinase assembly factor MAT1 [Sus scrofa]	NP_001159788.1
Chr01_71798631_71831568	Pig.02917	5.19628	2.37748	0.00207655	0.019589	yes	up	0.0629139	0	0.0247787	0.122721	0.18047	0.164386	0.0292309	0.155859	DDHD1-201	phospholipase DDHD1 isoform X5 [Sus scrofa]	XP_003121845.1
Chr01_72779231_72783251	Pig.02907	14.0341	3.81086	0.000196252	0.00313079	yes	up	0	0	0.0247787	0.155016	0.129939	0.0896652	0.00825956	0.124873	NID2-201	nidogen-2 isoform X1 [Sus scrofa]	XP_020957573.1
Chr01_74523778_74537105	Pig.02889	26.4454	4.72495	0.00626302	0.0432731	yes	up	0	0	0	0.0322951	0.0144376	0.0523047	0	0.0330125	SOS2-201	son of sevenless homolog 2 [Sus scrofa]	XP_020957098.1
Chr01_85074434_85082125		28.0006	4.80739	0.000596523	0.00729963	yes	up	0	0	0	0.0387541	0.036094	0.0298884	0	0.0349122	#N/A	#N/A	#N/A
Chr01_85074434_85093387		37.8416	5.2419	0.000188456	0.00302729	yes	up	0	0	0	0.0322951	0.0721881	0.0373605	0	0.0472812	#N/A	#N/A	#N/A
Chr01_85074434_85130540		16.684	4.0604	0.0201159	0.0945884	yes	up	0	0	0	0.0258361	0.0216564	0.0149442	0	0.0208122	#N/A	#N/A	#N/A
Chr01_87757404_87763045	Pig.02840	26.0118	4.70109	0.00225655	0.0210266	yes	up	0	0	0	0.0322951	0.0649693	0	0	0.0324215	NOX5-201	NADPH oxidase 5 isoform X2 [Sus scrofa]	XP_020956203.1
Chr01_89396683_89411464	Pig.02826	8.02454	3.00442	0.0372105	0.146486	yes	up	0.0251656	0	0	0.0710492	0.036094	0.0971373	0.00838853	0.0680935	ZC3H13-201	zinc finger CCCH domain-containing protein 13 isoform X8 [Sus scrofa]	XP_020921252.1
Chr01_89458208_89475492	Pig.02825	0.020281	-5.62373	0.000201225	0.00317685	yes	down	0.0440398	0.0306722	0.111504	0	0	0	0.062072	0	CPB2-201	carboxypeptidase B2 [Sus scrofa]	XP_001929181.1
Chr01_89458208_89480626	Pig.02825	0.046408	-4.42948	0.0170911	0.0850553	yes	down	0.0377484	0.0460083	0	0	0	0	0.0279189	0	CPB2-201	carboxypeptidase B2 [Sus scrofa]	XP_001929181.1
Chr01_89463756_89483212	Pig.02825	0.0339712	-4.87955	0.039182	0.151893	yes	down	0.0251656	0.0306722	0.055752	0	0	0	0.0371966	0	CPB2-201	carboxypeptidase B2 [Sus scrofa]	XP_001929181.1
Chr01_89715558_89717688	Pig.02822	59.8133	5.90239	1.09139e-05	0.000307914	yes	up	0	0	0	0.0775082	0.0866257	0.0597768	0	0.0746369	RUBCNL-201	protein RUBCNL-like isoform X1 [Sus scrofa]	XP_020921247.1
Chr01_99667043_99684106	Pig.13147	0.0309828	-5.01239	0.00355494	0.0291629	yes	down	0.0377484	0.0613444	0.0247787	0	0	0	0.0412905	0	PCSK6-201	proprotein convertase subtilisin/kexin type 6 isoform X4 [Sus scrofa]	XP_020954610.1
Chr01_99680098_99684106	Pig.13147	0.0392616	-4.67074	0.000107351	0.00198241	yes	down	0.0880795	0.199369	0.0681414	0	0.0144376	0	0.11853	0.00481254	PCSK6-201	proprotein convertase subtilisin/kexin type 6 isoform X4 [Sus scrofa]	XP_020954610.1
Chr02_10638020_10644799	Pig.14581	4.57557	2.19395	0.015837	0.0813752	yes	up	0.0188742	0	0.0123893	0.0839672	0.0216564	0.0448326	0.0104212	0.0501521	UBE2D3-202	NR:NA	NP_003330.1
Chr02_120685153_120715387	Pig.05931	0.0278282	-5.16731	0.000223473	0.00338768	yes	down	0.0503312	0.0306722	0.055752	0	0	0	0.0455851	0	GAS2-201	growth arrest-specific protein 2 [Sus scrofa]	XP_020938899.1
Chr02_12181017_12182283	Pig.14550,MSTRG.3715	7.36264	2.88022	0.0487131	0.173804	yes	up	0	0	0	0.0258361	0	0	0	0.00861202	#N/A	#N/A	#N/A
Chr02_129557508_129571492	Pig.12557	0.0437342	-4.51509	0.00323993	0.0274224	yes	down	0.0125828	0.0306722	0.0433627	0	0	0	0.0288726	0	QSER1-205	glutamine and serine-rich protein 1 [Sus scrofa]	XP_013849914.1
Chr02_129618137_129623462	Pig.12558	0.0188372	-5.73027	4.80802e-05	0.00103169	yes	down	0.0880795	0.0536764	0.0619467	0	0	0	0.0679009	0	DEPDC7-201	DEP domain-containing protein 7 [Sus scrofa]	XP_020938868.1
Chr02_130989369_130994154	Pig.12571	0.0486	-4.3629	0.0189754	0.0910521	yes	down	0.0377484	0.0230042	0.018584	0	0	0	0.0264455	0	CAT-201	catalase [Sus scrofa]	NP_999466.2
Chr02_130990677_130992200	Pig.12571	0.0266166	-5.23153	0.000809168	0.00944649	yes	down	0.0692053	0.0383403	0.037168	0	0	0	0.0482379	0	CAT-201	catalase [Sus scrofa]	NP_999466.2
Chr02_130990677_131007514	Pig.12571	0.217681	-2.19971	5.69583e-06	0.000195002	yes	down	0.679471	0.5521	0.538936	0.109803	0.0866257	0.194275	0.590169	0.130235	CAT-201	catalase [Sus scrofa]	NP_999466.2
Chr02_130992790_130998896	Pig.12571	0.0586814	-4.09095	0.0128716	0.0706665	yes	down	0.031457	0.0153361	0.018584	0	0	0	0.0217924	0	CAT-201	catalase [Sus scrofa]	NP_999466.2
Chr02_130998705_131007514	Pig.12571	0.065564	-3.93095	0.000270948	0.00396912	yes	down	0.0503312	0.306722	0.247787	0.0258361	0.0144376	0	0.201613	0.0134246	CAT-201	catalase [Sus scrofa]	NP_999466.2
Chr02_130998705_131012754	Pig.12571	0.0184223	-5.76241	0.00010492	0.0019613	yes	down	0.0440398	0.0690125	0.09292	0	0	0	0.0686574	0	CAT-201	catalase [Sus scrofa]	NP_999466.2
Chr02_13778027_13783009	Pig.14542	51.2811	5.68036	2.30193e-05	0.000565643	yes	up	0	0	0	0.0387541	0.0938445	0.0597768	0	0.0641251	SMAD1-201	SMAD5 [Homo sapiens]	ELR59268.1
Chr02_13790063_13790633		2.25776	1.17489	0.0207689	0.0970594	yes	up	0.031457	0.0996847	0.0247787	0.116262	0.0794069	0.149442	0.0519734	0.115037	#N/A	#N/A	#N/A
Chr02_138667128_138670999	Pig.12692	0.258138	-1.95379	0.00264494	0.023496	yes	down	0.0817881	0.161029	0.154867	0.0387541	0.0505317	0.0149442	0.132561	0.0347433	TTC17-201	tetratricopeptide repeat protein 17 isoform X1 [Sus scrofa]	XP_020938829.1
Chr02_141592909_141595750		0.276924	-1.85244	0.0457062	0.167589	yes	down	0.0188742	0.0383403	0.0681414	0	0.0216564	0.0149442	0.0417853	0.0122002	#N/A	#N/A	#N/A
Chr02_142242602_142243343		0.403561	-1.30914	0.000698235	0.00832007	yes	down	0.377484	0.559768	0.551326	0.213148	0.108282	0.291412	0.496192	0.204281	#N/A	#N/A	#N/A
Chr02_147307278_147309580	MSTRG.6341,Pig.14874	0.0436069	-4.5193	0.0465143	1	yes	down	0.0377484	0.0383403	0.0123893	0	0	0	0.0294927	0	#N/A	#N/A	#N/A
Chr02_15132030_15165811	Pig.17377	12.8172	3.68001	0.0185821	0.0895308	yes	up	0	0	0	0.0258361	0.0216564	0	0	0.0158308	SEC24A-201	protein transport protein Sec24A [Sus scrofa]	NP_001230853.1
Chr02_15152164_15161605	Pig.17377	0.0370967	-4.75256	0.0123156	1	yes	down	0.0125828	0.0460083	0.0433627	0	0	0	0.0339846	0	SEC24A-201	protein transport protein Sec24A [Sus scrofa]	NP_001230853.1
Chr02_15156668_15165811	Pig.17377	0.357313	-1.48474	0.0313725	0.128657	yes	down	0.031457	0.138025	0.0681414	0	0.0866257	0	0.0792077	0.0288752	SEC24A-201	protein transport protein Sec24A [Sus scrofa]	NP_001230853.1
Chr02_15163734_15169181	Pig.17377	0.124954	-3.00054	0.0237557	0.106603	yes	down	0.0188742	0.0690125	0.0247787	0	0.0144376	0	0.0375551	0.00481254	SEC24A-201	protein transport protein Sec24A [Sus scrofa]	NP_001230853.1
Chr02_15163734_15177107	Pig.17377	0.0689655	-3.85798	0.0449226	0.165547	yes	down	0.0125828	0.0306722	0.0123893	0	0	0	0.0185481	0	SEC24A-201	protein transport protein Sec24A [Sus scrofa]	NP_001230853.1
Chr02_152254104_152319280		0.00402301	-7.95751	4.70781e-09	3.87695e-07	yes	down	0.308278	0.23771	0.402653	0	0	0	0.316214	0	#N/A	#N/A	#N/A
Chr02_152270778_152273957	Pig.19118	0.00678315	-7.20383	1.34483e-08	1.02442e-06	yes	down	0.257947	0.115021	0.192035	0	0	0	0.188334	0	SLC22A9	solute carrier family 22 member 9-like isoform X1 [Sus scrofa]	XP_020938567.1
Chr02_155636386_155663230	Pig.20857	5.87229	2.55392	2.75307e-10	2.79621e-08	yes	up	0.0692053	0.0843486	0.09292	0.581312	0.42591	0.46327	0.082158	0.490164	Gstp1	glutathione S-transferase P-like isoform X1 [Sus scrofa]	XP_020938401.1
Chr02_156944449_156984195		0.275817	-1.85822	0.0158092	0.0813691	yes	down	0.157285	0.145693	0.408848	0.0322951	0.0721881	0.0971373	0.237275	0.0672068	#N/A	#N/A	#N/A
Chr02_158020903_158028723	Pig.17120	0.0813289	-3.62009	0.00443178	0.0340142	yes	down	0.0754967	0.0613444	0.037168	0	0	0.0149442	0.0580031	0.0049814	ANO1-204	anoctamin-1 isoform X1 [Sus scrofa]	XP_020938329.1
Chr02_158152493_158154207	Pig.17122	0.154313	-2.69607	0.00623257	0.0431606	yes	down	0.031457	0.0613444	0.0867254	0	0.0288752	0	0.0598422	0.00962508	PPFIA1-201	liprin-alpha-1 isoform X8 [Sus scrofa]	XP_020938327.1
Chr02_159713586_159713781		0.0436866	-4.51667	0.00577346	0.0411985	yes	down	0.0125828	0.0306722	0.0433627	0	0	0	0.0288726	0	#N/A	#N/A	#N/A
Chr02_161584456_161587851	Pig.20939	8.80608	3.1385	0.00958846	0.0577392	yes	up	0	0	0.0123893	0.0581312	0	0.0597768	0.00412978	0.0393026	EHMT2-201	histone-lysine N-methyltransferase EHMT1 isoform X3 [Sus scrofa]	XP_020936858.1
Chr02_161624907_161630872	Pig.20939	12.9259	3.69219	0.0324727	0.132102	yes	up	0	0	0	0.0193771	0.0288752	0	0	0.0160841	EHMT2-201	histone-lysine N-methyltransferase EHMT1 isoform X3 [Sus scrofa]	XP_020936858.1
Chr02_162769874_162784074	Pig.21711	0.0235596	-5.40754	0.0338563	0.136636	yes	down	0.0566225	0	0.105309	0	0	0	0.0539773	0	RXRA-201	retinoic acid receptor RXR-alpha isoform X2 [Sus scrofa]	XP_020927110.1
Chr02_162778048_162784074	Pig.21711	0.151794	-2.71981	5.0428e-12	9.60338e-10	yes	down	0.685762	0.759137	0.867254	0.116262	0.166033	0.074721	0.770718	0.119005	RXRA-201	retinoic acid receptor RXR-alpha isoform X2 [Sus scrofa]	XP_020927110.1
Chr02_163294494_163300319	Pig.14588	19.4273	4.28002	0.023969	0.10693	yes	up	0	0	0	0.012918	0	0.0597768	0	0.0242316	VAV2-201	guanine nucleotide exchange factor VAV2 isoform X1 [Sus scrofa]	XP_005654670.1
Chr02_165109871_165120399	Pig.14619	13.0315	3.70393	0.0339204	0.136714	yes	up	0	0	0	0.0193771	0.0144376	0.0149442	0	0.016253	RAPGEF1-201	LOW QUALITY PROTEIN: rap guanine nucleotide exchange factor 1 [Sus scrofa]	XP_014637753.1
Chr02_166541573_166560068	Pig.14639	21.0424	4.39523	0.0442596	1	yes	up	0	0	0	0.0193771	0.0144376	0.0448326	0	0.0262158	FNBP1-201	LOW QUALITY PROTEIN: formin-binding protein 1 [Sus scrofa]	XP_020925807.1
Chr02_166541573_166576722	Pig.14639	35.2232	5.13846	0.00615585	0.0428239	yes	up	0	0	0	0.0581312	0.0216564	0.0523047	0	0.0440308	FNBP1-201	LOW QUALITY PROTEIN: formin-binding protein 1 [Sus scrofa]	XP_020925807.1
Chr02_170808813_170811931		3.48755	1.80221	0.0411226	0.157215	yes	up	0	0.0536764	0	0.0452131	0.0794069	0.0523047	0.0178921	0.0589749	#N/A	#N/A	#N/A
Chr02_18600695_18607910	Pig.12406	5.90119	2.56101	0.000525844	0.00648683	yes	up	0.0251656	0.0383403	0.018584	0.20023	0.187689	0.0971373	0.0273633	0.161685	LYRM7-204	complex III assembly factor LYRM7 isoform X3 [Sus scrofa]	XP_020941079.1
Chr02_22409998_22415126	Pig.12386	0.167738	-2.57572	6.31872e-05	0.00125838	yes	down	0.119536	0.0843486	0.123893	0.0193771	0.0216564	0.0149442	0.109259	0.0186592	ALDH7A1-205	alpha-aminoadipic semialdehyde dehydrogenase [Sus scrofa]	XP_013850523.2
Chr02_33534085_33534503	Pig.05649	0.0108315	-6.52862	2.41838e-06	9.82508e-05	yes	down	0.125828	0.122689	0.105309	0	0	0	0.117942	0	KCNN2-201	small conductance calcium-activated potassium channel protein 2 isoform X2 [Sus scrofa]	XP_020940295.1
Chr02_37587799_37608291	Pig.05628	0.0482478	-4.37339	0.0339482	1	yes	down	0.0503312	0.0306722	0	0	0	0	0.0270011	0	MAN2A1-205	alpha-mannosidase 2 [Sus scrofa]	XP_003123871.4
Chr02_37605171_37608291	Pig.05628	0.0294005	-5.08802	0.0182423	1	yes	down	0.0692053	0	0.0619467	0	0	0	0.0437173	0	MAN2A1-205	alpha-mannosidase 2 [Sus scrofa]	XP_003123871.4
Chr02_37935438_37968636		2.73532	1.45171	0.0118949	0.06649	yes	up	0.0440398	0.0843486	0.0309733	0.103344	0.129939	0.201747	0.0531206	0.14501	#N/A	#N/A	#N/A
Chr02_4961816_4965986	Pig.12013	4.03061	2.011	2.95957e-05	0.000710063	yes	up	0.0377484	0.0306722	0.055752	0.161475	0.137157	0.216691	0.0413909	0.171775	PRELID2-202	PRELI domain-containing protein 2 isoform X1 [Sus scrofa]	XP_020940615.1
Chr02_56247505_56259953	Pig.02459	45.8793	5.51977	3.11395e-05	0.00073552	yes	up	0	0	0	0.0904263	0.0505317	0.0298884	0	0.0569488	MEF2C-204	PREDICTED: myocyte-specific enhancer factor 2C isoform X2 [Sorex araneus]	XP_020937758.1
Chr02_56247708_56259953		12.6973	3.66645	0.0170598	0.0850553	yes	up	0	0	0	0.0322951	0.0144376	0	0	0.0155776	#N/A	#N/A	#N/A
Chr02_60658293_60663530	Pig.02468	65.5872	6.03534	0.000403342	0.00527461	yes	up	0	0	0	0.0775082	0.108282	0.0597768	0	0.0818557	VCAN-201	versican core protein isoform X1 [Sus scrofa]	XP_020936732.1
Chr02_64288819_64298085	MSTRG.4458,MSTRG.4459,Pig.02491	0.0158191	-5.98219	3.49422e-06	0.00012984	yes	down	0.0817881	0.0996847	0.0619467	0	0	0	0.0811398	0	#N/A	#N/A	#N/A
Chr02_64288819_64310703	MSTRG.4458,MSTRG.4459,Pig.02491	0.00644692	-7.27717	3.02232e-09	2.55806e-07	yes	down	0.257947	0.176365	0.161061	0	0	0	0.198458	0	#N/A	#N/A	#N/A
Chr02_64293568_64310703	MSTRG.4458,MSTRG.4459,Pig.02491	0.116885	-3.09684	0.0317922	0.12968	yes	down	0.0125828	0	0.018584	0	0	0	0.0103889	0	#N/A	#N/A	#N/A
Chr02_64347276_64350833	MSTRG.4458,MSTRG.4459,Pig.02491	0.0719867	-3.79613	0.0148251	0.0774822	yes	down	0.0125828	0.0153361	0.0247787	0	0	0	0.0175659	0	#N/A	#N/A	#N/A
Chr02_64569831_64579384	MSTRG.4463,Pig.02493	0.0351753	-4.82929	0.00557885	0.0401862	yes	down	0.0251656	0.0460083	0.037168	0	0	0	0.036114	0	#N/A	#N/A	#N/A
Chr02_64570850_64579384	MSTRG.4463,Pig.02493	0.0380433	-4.71621	0.0396819	1	yes	down	0.0125828	0.0306722	0.055752	0	0	0	0.0330023	0	#N/A	#N/A	#N/A
Chr02_64635810_64674168	Pig.02495	0.0276642	-5.17583	0.000895327	0.0101793	yes	down	0.0503312	0.0383403	0.0495574	0	0	0	0.0460763	0	DMGDH-201	dimethylglycine dehydrogenase, mitochondrial isoform X1 [Sus scrofa]	XP_020940139.1
Chr02_64735168_64740696	Pig.02496	0.0429769	-4.5403	0.0212892	0.0985837	yes	down	0.0125828	0.0383403	0.037168	0	0	0	0.0293637	0	ARSB-202	arylsulfatase B isoform X1 [Sus scrofa]	XP_020940137.1
Chr02_64735168_64749814	Pig.02496	0.0781954	-3.67677	0.00313845	0.0269376	yes	down	0.0503312	0.0613444	0.0619467	0.012918	0	0	0.0578741	0.00430601	ARSB-202	arylsulfatase B isoform X1 [Sus scrofa]	XP_020940137.1
Chr02_66979806_66991420	Pig.02512	0.0100222	-6.64066	4.47231e-07	2.47766e-05	yes	down	0.138411	0.145693	0.0991147	0	0	0	0.127739	0	IQGAP2-201	LOW QUALITY PROTEIN: ras GTPase-activating-like protein IQGAP2 [Sus scrofa]	XP_020940121.1
Chr02_66979806_66998212	Pig.02512	0.0389861	-4.6809	0.00102936	0.0112017	yes	down	0.0440398	0.0230042	0.0309733	0	0	0	0.0326724	0	IQGAP2-201	LOW QUALITY PROTEIN: ras GTPase-activating-like protein IQGAP2 [Sus scrofa]	XP_020940121.1
Chr02_70309759_70310360	Pig.02537	20.8349	4.38093	0.00738874	0.0482333	yes	up	0	0	0	0.0258361	0	0.0523047	0	0.0260469	FCHO2-204	F-BAR domain only protein 2 isoform X1 [Sus scrofa]	XP_020940096.1
Chr02_70913021_70914547	Pig.02543	4.75811	2.25039	0.00120063	0.0125715	yes	up	0.0503312	0.0306722	0	0.0387541	0.173251	0.171858	0.0270011	0.127955	SIMC1-201	SUMO-interacting motif-containing protein 1 isoform X1 [Sus scrofa]	XP_005661533.1
Chr02_78919404_78932243		0.0312807	-4.99858	0.00467982	0.0353832	yes	down	0.0125828	0.0460083	0.0619467	0	0	0	0.0401793	0	#N/A	#N/A	#N/A
Chr02_80315127_80316205	Pig.12229	0.0179805	-5.79742	0.000644045	0.00778732	yes	down	0.0629139	0.0306722	0.117699	0	0	0	0.0704283	0	C3-201	complement C3 precursor [Sus scrofa]	XP_020936478.1
Chr02_80316000_80316205	Pig.12229	0.0122023	-6.3567	0.0171596	0.0850553	yes	down	0.113245	0.0766805	0.123893	0	0	0	0.104606	0	C3-201	complement C3 precursor [Sus scrofa]	XP_020936478.1
Chr02_83909541_83910328	Pig.16212	0.034001	-4.87828	0.000445677	0.00565824	yes	down	0.031457	0.0306722	0.0495574	0	0	0	0.0372288	0	LOC101123861	complement C3 [Sus scrofa]	XP_005654909.1
Chr02_84420990_84443541	Pig.16229	0.0710446	-3.81513	0.00648648	0.0445142	yes	down	0.0817881	0.0690125	0.0495574	0	0	0.0149442	0.066786	0.0049814	Pm20d1	N-fatty-acyl-amino acid synthase/hydrolase PM20D1 isoform X1 [Sus scrofa]	XP_005654890.3
Chr02_84439685_84443541	Pig.16229	0.00871049	-6.84303	6.15766e-07	3.29165e-05	yes	down	0.195033	0.161029	0.0867254	0	0	0	0.147596	0	Pm20d1	N-fatty-acyl-amino acid synthase/hydrolase PM20D1 isoform X1 [Sus scrofa]	XP_005654890.3
Chr02_92734565_92744854	MSTRG.5482	0.138169	-2.85549	5.02535e-05	0.00105602	yes	down	0.201325	0.115021	0.136283	0.0193771	0.0216564	0.0224163	0.150876	0.0211499	0	0	XP_020935332.1
Chr02_92738870_92744854	MSTRG.5482	0.342259	-1.54684	2.84192e-11	3.93606e-09	yes	down	0.824173	0.774473	0.792918	0.245443	0.30319	0.28394	0.797188	0.277524	0	0	XP_020935332.1
Chr02_95298630_95299695	Pig.06350	0.425056	-1.23428	0.0169032	0.0847105	yes	down	0.144702	0.145693	0.198229	0.0581312	0.0794069	0.074721	0.162875	0.070753	MAST3-201	microtubule-associated serine/threonine-protein kinase 3 isoform X3 [Sus scrofa]	XP_020939140.1
Chr03_105960945_105982265	MSTRG.9694,Pig.17769	0.324589	-1.62331	0.0472852	0.171318	yes	down	0.0817881	0.0613444	0.0495574	0.0193771	0.0288752	0.0149442	0.06423	0.0210655	#N/A	#N/A	#N/A
Chr03_109907028_109909284	MSTRG.9767	0.0127287	-6.29577	1.41639e-06	6.53902e-05	yes	down	0.0754967	0.0996847	0.123893	0	0	0	0.0996916	0	0	0	XP_020942219.1
Chr03_111561487_111577057	Pig.11639	3.48373	1.80063	0.0368539	0.145458	yes	up	0	0	0.0433627	0.0516721	0.036094	0.074721	0.0144542	0.0541624	SMG1-201	serine/threonine-protein kinase SMG1 isoform X1 [Sus scrofa]	XP_020942206.1
Chr03_116800433_116800867	Pig.16768	6.98849	2.80498	1.01387e-07	6.43593e-06	yes	up	0.031457	0.0383403	0.018584	0.161475	0.24544	0.209219	0.0294604	0.205378	TNRC6C-202	trinucleotide repeat-containing gene 6A protein isoform X4 [Sus scrofa]	XP_020936978.1
Chr03_118967715_118988965	Pig.17929	0.328843	-1.60453	0.000698833	0.00832007	yes	down	0.138411	0.107353	0.130088	0.0581312	0.0144376	0.0523047	0.125284	0.0416245	FAM120A-203	constitutive coactivator of PPAR-gamma-like protein 1 isoform X1 [Sus scrofa]	XP_020943836.1
Chr03_118983837_118988965	Pig.17929	0.365997	-1.4501	0.00441271	0.0340142	yes	down	0.0754967	0.138025	0.09292	0.0322951	0.0216564	0.0597768	0.102147	0.0379094	FAM120A-203	constitutive coactivator of PPAR-gamma-like protein 1 isoform X1 [Sus scrofa]	XP_020943836.1
Chr03_121945221_121948271		0.0297665	-5.07017	0.0238769	0.106832	yes	down	0.0188742	0.0460083	0.0619467	0	0	0	0.0422764	0	#N/A	#N/A	#N/A
Chr03_123046084_123053024		14.8199	3.88947	0.0486716	1	yes	up	0	0	0	0.0193771	0.036094	0	0	0.0184904	#N/A	#N/A	#N/A
Chr03_123607171_123610366		0.0687379	-3.86275	0.0445209	1	yes	down	0.0440398	0	0.0123893	0	0	0	0.0188097	0	#N/A	#N/A	#N/A
Chr03_125194588_125198158	Pig.13729	0.02585	-5.27369	0.0344266	1	yes	down	0.0629139	0.0613444	0.0247787	0	0	0	0.049679	0	AUTS2-203	autism susceptibility gene 2 protein [Sus scrofa]	NP_001233198.1
Chr03_126206126_126206928	Pig.21565	4.62515	2.2095	0.0100361	0.0590348	yes	up	0.0125828	0	0.0247787	0.0581312	0.0216564	0.104609	0.0124538	0.0614657	ZNF713-201	zinc finger protein 713 [Sus scrofa]	XP_003124511.4
Chr03_133654793_133680380	MSTRG.10349,Pig.09034	22.0899	4.46532	0.0196727	0.0933913	yes	up	0	0	0	0.0387541	0.0216564	0.0224163	0	0.0276089	#N/A	#N/A	#N/A
Chr03_18487520_18505658		0.0595338	-4.07015	0.00838227	0.0527859	yes	down	0.0125828	0	0.0495574	0	0	0	0.0207134	0	#N/A	#N/A	#N/A
Chr03_19922963_19949910	Pig.20029	0.0538984	-4.21361	0.0464441	1	yes	down	0.0377484	0.0153361	0.018584	0	0	0	0.0238895	0	DTNB	dystrobrevin beta isoform X1 [Sus scrofa]	XP_020943401.1
Chr03_20064214_20080765	Pig.20028	0.0624927	-4.00017	0.0493021	1	yes	down	0	0.0613444	0	0	0	0	0.0204481	0	ASXL2-201	putative Polycomb group protein ASXL2 isoform X1 [Sus scrofa]	XP_020943398.1
Chr03_20091718_20131946	Pig.20028	0.147782	-2.75846	0.00198685	0.018801	yes	down	0.0251656	0.0920166	0.0681414	0.0258361	0	0	0.0617745	0.00861202	ASXL2-201	putative Polycomb group protein ASXL2 isoform X1 [Sus scrofa]	XP_020943398.1
Chr03_25652991_25679699	Pig.06700	2.79065	1.4806	0.0449319	0.165547	yes	up	0	0.0306722	0.0433627	0.0645902	0.101063	0.0448326	0.0246783	0.070162	MEMO1-201	protein MEMO1 isoform 1 [Homo sapiens]	XP_021109356.1
Chr03_30444359_30445305	MSTRG.8087	2.99283	1.58151	0.00319561	0.0271226	yes	up	0.031457	0.0996847	0.055752	0.180853	0.24544	0.134498	0.0622979	0.18693	0	0	XP_003125283.3
Chr03_31031804_31049311	Pig.06727	0.0226146	-5.4666	4.49266e-05	0.00098483	yes	down	0.0503312	0.0766805	0.0433627	0	0	0	0.0567914	0	RMDN2-201	regulator of microtubule dynamics protein 2 isoform X1 [Sus scrofa]	XP_013851658.1
Chr03_38623681_38666459	Pig.08262	0.0395067	-4.66176	0.0245103	1	yes	down	0.031457	0.0153361	0.0495574	0	0	0	0.0321168	0	NRXN1-201	neurexin-1 isoform X8 [Sus scrofa]	XP_020943899.1
Chr03_39096752_39101234	Pig.08262	0.0605258	-4.04631	0.0381624	1	yes	down	0.0188742	0	0.0433627	0	0	0	0.0207456	0	NRXN1-201	neurexin-1 isoform X8 [Sus scrofa]	XP_020943899.1
Chr03_41639808_41650905	Pig.08256	0.050448	-4.30906	0.00877763	0.0541405	yes	down	0.031457	0	0.0433627	0	0	0	0.0249399	0	PSME4-202	proteasome activator complex subunit 4 isoform X1 [Sus scrofa]	XP_003125198.5
Chr03_45601718_45637098	MSTRG.8253,Pig.04789,MSTRG.8254	0.315995	-1.66203	3.91859e-08	2.65332e-06	yes	down	0.780133	0.690125	0.799112	0.258361	0.24544	0.224163	0.756457	0.242654	#N/A	#N/A	#N/A
Chr03_48596408_48615983	Pig.04800	0.0512047	-4.28758	0.0483674	1	yes	down	0.0377484	0	0.037168	0	0	0	0.0249721	0	USP34-201	ubiquitin carboxyl-terminal hydrolase 34 isoform X1 [Sus scrofa]	XP_020943148.1
Chr03_49877158_49914929	Pig.04812	7.68223	2.94153	0.0323141	0.131632	yes	up	0	0	0.018584	0.0581312	0.0649693	0.0298884	0.00619467	0.0509963	EHBP1-204	EH domain-binding protein 1 isoform X1 [Sus scrofa]	XP_020943128.1
Chr03_49988991_50015826	Pig.04812	40.2952	5.33253	0.000442283	0.00563864	yes	up	0	0	0	0.0775082	0.036094	0.0373605	0	0.0503209	EHBP1-204	EH domain-binding protein 1 isoform X1 [Sus scrofa]	XP_020943128.1
Chr03_49988991_50034685	Pig.04812	6.9586	2.7988	0.00617229	0.0428405	yes	up	0.0188742	0	0.018584	0.0968853	0.101063	0.074721	0.0124861	0.0908899	EHBP1-204	EH domain-binding protein 1 isoform X1 [Sus scrofa]	XP_020943128.1
Chr03_50015679_50034685	Pig.04812	5.38718	2.42953	0.000413178	0.00533455	yes	up	0.0566225	0.0230042	0.055752	0.374623	0.202127	0.171858	0.0451262	0.249536	EHBP1-204	EH domain-binding protein 1 isoform X1 [Sus scrofa]	XP_020943128.1
Chr03_50973589_50974664	MSTRG.8330,Pig.04818	0.0823008	-3.60295	2.17731e-06	9.08803e-05	yes	down	0.18245	0.115021	0.117699	0.0322951	0	0	0.13839	0.010765	#N/A	#N/A	#N/A
Chr03_5673086_5684674	Pig.15960	0.163625	-2.61153	0.0106614	0.061759	yes	down	0.0188742	0.0536764	0.055752	0	0	0.0224163	0.0427675	0.0074721	PPM1A-201	LOW QUALITY PROTEIN: protein phosphatase 1B [Sus scrofa]	XP_015997703.1
Chr03_56761987_56769941	Pig.04857	0.238383	-2.06865	0.0316728	0.12954	yes	down	0.0251656	0.0383403	0.0495574	0.0258361	0	0	0.0376877	0.00861202	TIA1-203	nucleolysin TIA-1 isoform X3 [Sus scrofa]	XP_020943059.1
Chr03_56769866_56775494	Pig.04857	0.149975	-2.73721	0.0370906	0.146203	yes	down	0.0377484	0.0383403	0.018584	0	0	0.0149442	0.0315575	0.0049814	TIA1-203	nucleolysin TIA-1 isoform X3 [Sus scrofa]	XP_020943059.1
Chr03_57686609_57732712	Pig.04872	20.9318	4.38762	0.0122153	0.0677784	yes	up	0	0	0	0.0193771	0.0216564	0.0373605	0	0.0261313	ZNF638-202	zinc finger protein 638 isoform X4 [Sus scrofa]	XP_005662532.1
Chr03_68915830_68927802	Pig.13937	0.0243436	-5.36031	0.014049	0.074639	yes	down	0.0629139	0.0766805	0.018584	0	0	0	0.0527262	0	SUCLG1-203	succinate--CoA ligase [ADP/GDP-forming]	XP_020941544.1
Chr03_75183979_75196214	Pig.13452	0.207048	-2.27196	0.0160114	0.08172	yes	down	0.0880795	0.0383403	0.0433627	0	0.036094	0	0.0565942	0.0120313	IL1R1-202	interleukin-1 receptor type 1 isoform X1 [Sus scrofa]	XP_013851373.2
Chr03_76209366_76216392	Pig.09468,MSTRG.8682	0.240825	-2.05394	0.0285291	0.120233	yes	down	0.0566225	0.0306722	0.055752	0.012918	0	0.0224163	0.0476823	0.0117781	#N/A	#N/A	#N/A
Chr03_79003261_79025856	Pig.09438	0.0409463	-4.61012	0.0104029	0.0605903	yes	down	0.0251656	0.0306722	0.037168	0	0	0	0.0310019	0	VWA3B-202	von Willebrand factor A domain-containing protein 3B isoform X1 [Sus scrofa]	XP_020942889.1
Chr03_81045165_81046139	Pig.09407	0.0556173	-4.16832	0.00857955	0.0533508	yes	down	0.0188742	0.0383403	0.0123893	0	0	0	0.0232013	0	THNSL2-201	LOW QUALITY PROTEIN: threonine synthase-like 2 [Sus scrofa]	XP_020942936.1
Chr03_81276019_81282108	Pig.09400	15.1533	3.92156	0.0365976	0.14501	yes	up	0	0	0	0.012918	0.0288752	0.0149442	0	0.0189125	RMND5A-201	PREDICTED: protein RMD5 homolog A [Equus asinus]	EDK98940.1
Chr03_84636714_84655608	Pig.13165	29.962	4.90506	0.0075428	0.0486926	yes	up	0	0	0	0.0387541	0.036094	0.0373605	0	0.0374029	ZC3H6-201	zinc finger CCCH domain-containing protein 6 [Sus scrofa]	XP_020942684.1
Chr03_89657255_89671619	MSTRG.9044,Pig.09102	0.0245745	-5.34669	0.000117693	0.00212196	yes	down	0.0692053	0.0766805	0.0123893	0	0	0	0.0527584	0	#N/A	#N/A	#N/A
Chr03_89663115_89671619	MSTRG.9044,Pig.09102	0.0385299	-4.69788	0.00104229	0.0112619	yes	down	0.0377484	0.0306722	0.0309733	0	0	0	0.0331313	0	#N/A	#N/A	#N/A
Chr03_89667585_89671619	MSTRG.9044,Pig.09102	0.0102133	-6.61341	3.03586e-07	1.79898e-05	yes	down	0.163576	0.0613444	0.148672	0	0	0	0.124531	0	#N/A	#N/A	#N/A
Chr03_89677790_89686941	MSTRG.9044,Pig.09102	0.0434351	-4.525	0.00519536	0.0383299	yes	down	0.0251656	0.0383403	0.0247787	0	0	0	0.0294282	0	#N/A	#N/A	#N/A
Chr03_89683944_89733650	MSTRG.9044	6.14899e-10	-30.5989	2.40928e-08	1.74788e-06	yes	down	2.9255	0	0	0	0	0	0.975166	0	0	0	AKO62660.1
Chr03_89873248_89879377	Pig.09104	0.0255059	-5.29303	5.99557e-05	0.00120983	yes	down	0.0503312	0.0230042	0.074336	0	0	0	0.0492238	0	CYP3A29-207	cytochrome P450 CYP3A [Sus scrofa]	ACG76385.1
Chr03_90754803_90755717		0.245082	-2.02866	0.0237216	0.106603	yes	down	0.0440398	0.0766805	0.074336	0.0193771	0.0288752	0	0.0650188	0.0160841	#N/A	#N/A	#N/A
Chr03_93652036_93670231	Pig.09212	18.6779	4.22326	0.00688876	0.046132	yes	up	0	0	0	0.0258361	0.0216564	0.0224163	0	0.0233029	BAZ1B-201	tyrosine-protein kinase BAZ1B [Sus scrofa]	XP_005662033.2
Chr03_96789698_96804486	Pig.10269,MSTRG.9426	0.164345	-2.6052	0.0342109	0.13719	yes	down	0.0503312	0.0153361	0.018584	0	0.0144376	0	0.0280838	0.00481254	#N/A	#N/A	#N/A
Chr03_98846333_98847046	Pig.10357	0.296879	-1.75205	0.0204019	0.0956455	yes	down	0.0629139	0.0843486	0.0619467	0.0258361	0.0216564	0.0149442	0.0697364	0.0208122	CREBBP-201	CREB-binding protein [Sus scrofa]	XP_005662241.2
Chr04_110101379_110134080	Pig.01698	0.113425	-3.14018	1.59765e-06	7.1589e-05	yes	down	0.201325	0.145693	0.192035	0.0452131	0	0.0149442	0.179684	0.0200524	TLCD4-RWDD3	transmembrane protein 56 isoform X2 [Sus scrofa]	XP_020945824.1
Chr04_110124557_110134080	Pig.01698	0.0157687	-5.98679	9.90616e-06	0.000293049	yes	down	0.0943709	0.0613444	0.0867254	0	0	0	0.0808136	0	TLCD4-RWDD3	transmembrane protein 56 isoform X2 [Sus scrofa]	XP_020945824.1
Chr04_110944817_110979306		18.1442	4.18144	0.0484869	1	yes	up	0	0	0	0.0387541	0.0144376	0.0149442	0	0.022712	#N/A	#N/A	#N/A
Chr04_113700873_113752559		15.0985	3.91633	3.74207e-05	0.000844598	yes	up	0.0125828	0.0230042	0.0123893	0.348787	0.267096	0.112081	0.0159921	0.242655	#N/A	#N/A	#N/A
Chr04_113748733_113752559	Pig.01735	11.6268	3.53938	2.96604e-06	0.000112969	yes	up	0.031457	0	0.0247787	0.193771	0.259877	0.231635	0.0187452	0.228428	ZNF644-207	zinc finger protein 644 isoform X1 [Sus scrofa]	XP_020945920.1
Chr04_117045483_117065883	MSTRG.12519,Pig.01753	0.0631156	-3.98586	0.0158024	0.0813691	yes	down	0.0125828	0.0230042	0.0247787	0	0	0	0.0201219	0	#N/A	#N/A	#N/A
Chr04_117055265_117065883	MSTRG.12519,Pig.01753	0.0437211	-4.51553	0.00373883	0.0299795	yes	down	0.0125828	0.0306722	0.0433627	0	0	0	0.0288726	0	#N/A	#N/A	#N/A
Chr04_117311656_117319079	Pig.01755	2.90209	1.53709	0.0260474	0.113058	yes	up	0.0692053	0.0306722	0	0.0839672	0.0938445	0.112081	0.0332925	0.0966311	SH3GLB1-201	endophilin-B1 isoform X1 [Sus scrofa]	XP_005663778.1
Chr04_118647528_118648214	Pig.01766	0.0125207	-6.31955	8.52969e-06	0.000262525	yes	down	0.106954	0.0996847	0.0991147	0	0	0	0.101918	0	SYDE2-201	LOW QUALITY PROTEIN: rho GTPase-activating protein SYDE2 [Sus scrofa]	XP_001928259.4
Chr04_24119381_24174339	Pig.08071	111.871	6.80569	0.0113971	0.0646683	yes	up	0	0	0	0.187312	0.166033	0.0672489	0	0.140198	RGS22-202	regulator of G-protein signaling 22 isoform X2 [Sus scrofa]	XP_020944711.1
Chr04_28268052_28272728	MSTRG.10816,Pig.08101	0.00335526	-8.21936	1.51372e-10	1.70827e-08	yes	down	0.415232	0.291386	0.433627	0	0	0	0.380082	0	#N/A	#N/A	#N/A
Chr04_30299278_30309026	Pig.08107	103.958	6.69986	1.31659e-06	6.28141e-05	yes	up	0	0	0	0.0968853	0.194908	0.0971373	0	0.129643	OXR1-205	oxidation resistance protein 1 isoform X4 [Sus scrofa]	XP_013852007.1
Chr04_30299278_30333225	Pig.08107	5.13643	2.36077	0.0172365	0.085259	yes	up	0.0440398	0.0306722	0.0123893	0.161475	0.115501	0.171858	0.0290338	0.149612	OXR1-205	oxidation resistance protein 1 isoform X4 [Sus scrofa]	XP_013852007.1
Chr04_30299278_30338140	Pig.08107	42.1455	5.39731	0.00739752	0.0482333	yes	up	0	0	0	0.0258361	0.0866257	0.0448326	0	0.0524315	OXR1-205	oxidation resistance protein 1 isoform X4 [Sus scrofa]	XP_013852007.1
Chr04_30299278_30342356	Pig.08107	24.6028	4.62075	2.59267e-06	0.000102596	yes	up	0	0	0.0309733	0.161475	0.317628	0.336244	0.0103244	0.271782	OXR1-205	oxidation resistance protein 1 isoform X4 [Sus scrofa]	XP_013852007.1
Chr04_30321584_30342356	Pig.08107	66.4882	6.05503	0.0460092	0.167892	yes	up	0	0	0	0.0645902	0.0866257	0.0971373	0	0.0827844	OXR1-205	oxidation resistance protein 1 isoform X4 [Sus scrofa]	XP_013852007.1
Chr04_36790993_36805402	Pig.01495	0.06338	-3.97983	0.0198234	0.0935012	yes	down	0.0188742	0.0230042	0.018584	0	0	0	0.0201541	0	WWP1-201	NEDD4-like E3 ubiquitin-protein ligase WWP1 isoform X1 [Sus scrofa]	XP_005663042.1
Chr04_36796856_36807236	Pig.01495	0.0437834	-4.51347	0.00389923	0.0308414	yes	down	0.0629139	0	0.0247787	0	0	0	0.0292309	0	WWP1-201	NEDD4-like E3 ubiquitin-protein ligase WWP1 isoform X1 [Sus scrofa]	XP_005663042.1
Chr04_36805153_36807236	Pig.01495	0.0554833	-4.1718	0.0108118	0.062393	yes	down	0.0440398	0	0.0247787	0	0	0	0.0229395	0	WWP1-201	NEDD4-like E3 ubiquitin-protein ligase WWP1 isoform X1 [Sus scrofa]	XP_005663042.1
Chr04_36821977_36836417	Pig.01495	0.236995	-2.07707	0.00258706	0.0232531	yes	down	0.100662	0.153361	0.123893	0.0322951	0.036094	0.0224163	0.125972	0.0302685	WWP1-201	NEDD4-like E3 ubiquitin-protein ligase WWP1 isoform X1 [Sus scrofa]	XP_005663042.1
Chr04_36821977_36851349	Pig.01495	0.0451251	-4.46993	0.0174104	0.0857952	yes	down	0.0440398	0.0230042	0.018584	0	0	0	0.0285426	0	WWP1-201	NEDD4-like E3 ubiquitin-protein ligase WWP1 isoform X1 [Sus scrofa]	XP_005663042.1
Chr04_36836233_36875034		0.0308108	-5.02042	0.0173373	0.0856187	yes	down	0.0629139	0	0.0619467	0	0	0	0.0416202	0	#N/A	#N/A	#N/A
Chr04_36861805_36875034		0.013607	-6.1995	2.04027e-05	0.000518058	yes	down	0.132119	0.0383403	0.111504	0	0	0	0.0939879	0	#N/A	#N/A	#N/A
Chr04_4037434_4061942	Pig.13340	22.6548	4.50174	0.00838476	0.0527859	yes	up	0	0	0	0.0258361	0.0216564	0.0373605	0	0.0282843	ASAP1-201	arf-GAP with SH3 domain, ANK repeat and PH domain-containing protein 1 isoform X1 [Sus scrofa]	XP_020944565.1
Chr04_42637595_42638483	Pig.01470	3.64857	1.86733	0.0490463	0.174381	yes	up	0.0188742	0	0.0123893	0.0258361	0.0649693	0.0298884	0.0104212	0.0402313	ZBTB10-201	zinc finger and BTB domain-containing protein 10 isoform X1 [Sus scrofa]	XP_001928312.1
Chr04_48646096_48666494	Pig.01448	0.0953967	-3.38992	0.0284392	0.120033	yes	down	0.0125828	0.0153361	0.0123893	0	0	0	0.0134361	0	STAU2-203	double-stranded RNA-binding protein Staufen homolog 2 isoform X7 [Sus scrofa]	XP_020944868.1
Chr04_54237280_54260936	Pig.01421	15.7084	3.97346	0.041457	0.157505	yes	up	0	0	0	0	0.0288752	0.0298884	0	0.0195879	CSPP1-208	centrosome and spindle pole-associated protein 1 isoform X1 [Sus scrofa]	XP_013852149.1
Chr04_55472441_55495387		0.388677	-1.36336	0.0428839	0.160373	yes	down	0.0880795	0.0690125	0.09292	0.0193771	0.0649693	0.0149442	0.0833373	0.0330968	#N/A	#N/A	#N/A
Chr04_58498565_58501388	Pig.14062,MSTRG.11105	6.58206	2.71854	1.29321e-10	1.51555e-08	yes	up	0.100662	0.0536764	0.0495574	0.561935	0.353722	0.448326	0.0679653	0.454661	#N/A	#N/A	#N/A
Chr04_58527407_58562535	Pig.14062,MSTRG.11105	31.5127	4.97786	0.000183319	0.00298702	yes	up	0	0.0153361	0	0.12918	0.18047	0.134498	0.00511203	0.148049	#N/A	#N/A	#N/A
Chr04_58547233_58562535	Pig.14062,MSTRG.11105	13.6087	3.76646	0.00694668	0.04636	yes	up	0.0125828	0	0	0.0904263	0.036094	0.0523047	0.00419426	0.0596083	#N/A	#N/A	#N/A
Chr04_59139762_59141172	Pig.14064	4.32094	2.11134	0.00599086	0.0421766	yes	up	0.0188742	0	0.037168	0.0516721	0.115501	0.0896652	0.0186807	0.0856128	CHD7-201	chromodomain-helicase-DNA-binding protein 7 isoform X1 [Sus scrofa]	XP_020944993.1
Chr04_60923348_60923925	Pig.14072	0.137135	-2.86633	0.0238643	0.106832	yes	down	0.0377484	0	0.0619467	0	0	0.0149442	0.0332317	0.0049814	CYP7A1-201	cholesterol 7-alpha-monooxygenase isoform X1 [Sus scrofa]	XP_020944405.1
Chr04_60968359_60988247	Pig.14073	0.164697	-2.60211	0.00357956	0.0291629	yes	down	0.0566225	0.0690125	0.0433627	0.012918	0	0.0149442	0.0563326	0.00928741	UBXN2B-201	UBX domain-containing protein 2B [Sus scrofa]	XP_001925017.1
Chr04_64703098_64703528		11.0608	3.46739	0.0150097	0.0783128	yes	up	0	0	0	0.0258361	0.0144376	0	0	0.0134246	#N/A	#N/A	#N/A
Chr04_66658600_66674205	MSTRG.11201,Pig.04915	0.0562415	-4.15222	0.0179193	0.0872205	yes	down	0.0566225	0	0.0123893	0	0	0	0.023004	0	#N/A	#N/A	#N/A
Chr04_66745876_66758678	MSTRG.11201,Pig.04915	0.133371	-2.90649	0.0171674	0.0850553	yes	down	0.0440398	0.0306722	0.074336	0.0193771	0	0	0.0496827	0.00645902	#N/A	#N/A	#N/A
Chr04_67550881_67619743	Pig.04920	4.98148	2.31658	0.00149141	0.014828	yes	up	0.0251656	0.0230042	0.0433627	0.174393	0.151595	0.14197	0.0305108	0.155986	KIFAP3-201	kinesin-associated protein 3 isoform X2 [Sus scrofa]	XP_001927795.3
Chr04_67998566_68004542	Pig.04929	0.0429542	-4.54106	0.00356879	0.0291629	yes	down	0.0251656	0.0460083	0.018584	0	0	0	0.0299193	0	F5-201	coagulation factor V precursor [Sus scrofa]	NP_999285.1
Chr04_68040587_68052911	Pig.04929	0.0283392	-5.14106	0.0147498	0.0772208	yes	down	0.0566225	0.0230042	0.055752	0	0	0	0.0451262	0	F5-201	coagulation factor V precursor [Sus scrofa]	NP_999285.1
Chr04_69592517_69597236	Pig.04945	0.0734504	-3.76709	0.00752824	0.0486926	yes	down	0.0125828	0	0.037168	0	0	0	0.0165836	0	DCAF6-204	DDB1- and CUL4-associated factor 6 isoform X5 [Sus scrofa]	XP_020945113.1
Chr04_69630465_69649188	Pig.04945	0.127766	-2.96842	0.0271661	0.116257	yes	down	0.0377484	0.0306722	0.037168	0.012918	0	0	0.0351962	0.00430601	DCAF6-204	DDB1- and CUL4-associated factor 6 isoform X5 [Sus scrofa]	XP_020945113.1
Chr04_75909038_75909407		2.32507	1.21728	0.00127553	0.0131747	yes	up	0.113245	0.0843486	0.0991147	0.226066	0.267096	0.209219	0.0989028	0.234127	#N/A	#N/A	#N/A
Chr04_76988937_77006171	Pig.10648	0.0866104	-3.52932	0.043911	0.162954	yes	down	0.0251656	0	0.018584	0	0	0	0.0145832	0	COPA-201	coatomer subunit alpha isoform X1 [Sus scrofa]	XP_001928732.1
Chr04_77070685_77073952	Pig.10646,MSTRG.11434,MSTRG.11433	0.125756	-2.9913	0.00472628	0.035558	yes	down	0.106954	0.0843486	0.037168	0	0	0.0298884	0.0761568	0.0099628	#N/A	#N/A	#N/A
Chr04_80611471_80620253	Pig.10548	0.379314	-1.39854	0.00262917	0.0234242	yes	down	0.207616	0.138025	0.123893	0.0968853	0.0288752	0.0523047	0.156511	0.0593551	CCT3-202	T-complex protein 1 subunit gamma [Sus scrofa]	NP_001231109.1
Chr04_80611471_80622183	Pig.10548	0.232439	-2.10507	0.000923007	0.0104163	yes	down	0.169868	0.0460083	0.0805307	0.0258361	0.0216564	0.0224163	0.0988022	0.0233029	CCT3-202	T-complex protein 1 subunit gamma [Sus scrofa]	NP_001231109.1
Chr04_80611471_80623684	Pig.10548	0.337328	-1.56777	0.0255486	0.111368	yes	down	0.0629139	0.0460083	0.055752	0.012918	0	0.0448326	0.0548914	0.0192502	CCT3-202	T-complex protein 1 subunit gamma [Sus scrofa]	NP_001231109.1
Chr04_81182357_81195763		0.385023	-1.37698	0.0244931	0.108475	yes	down	0.138411	0.0920166	0.0991147	0.0193771	0.0433129	0.0672489	0.109847	0.0433129	#N/A	#N/A	#N/A
Chr04_84437367_84480330	Pig.18107	0.125518	-2.99403	0.030028	0.124653	yes	down	0.0251656	0.0383403	0.0433627	0.012918	0	0	0.0356228	0.00430601	SNX27-201	sorting nexin-27 [Bos taurus]	XP_003125809.1
Chr04_84654052_84655582		0.132507	-2.91586	0.033493	0.135709	yes	down	0.0440398	0.0306722	0.0309733	0	0.0144376	0	0.0352284	0.00481254	#N/A	#N/A	#N/A
Chr04_9772083_9785803		3.00771	1.58867	0.0208939	0.0972549	yes	up	0.0943709	0.0383403	0.0433627	0.258361	0.173251	0.104609	0.0586913	0.178741	#N/A	#N/A	#N/A
Chr04_98096686_98108020		69107.6	16.0766	0.0258022	0.112313	yes	up	0	0	0	0	0.0216564	0	0	0.00721881	#N/A	#N/A	#N/A
Chr05_102030367_102031420	Pig.11741	0.0235444	-5.40847	0.000130303	0.00232183	yes	down	0.0629139	0.0306722	0.0681414	0	0	0	0.0539092	0	NAV3	neuron navigator 3 isoform X1 [Sus scrofa]	XP_020948732.1
Chr05_103221996_103282566	Pig.11737	6.38826	2.67542	0.00581954	0.0412517	yes	up	0.0125828	0	0.018584	0.122721	0.0505317	0.0373605	0.0103889	0.0702045	ZDHHC17-202	palmitoyltransferase ZDHHC17 [Aotus nancymaae]	XP_020948474.1
Chr05_104214626_104274170	MSTRG.14747	0.014317	-6.12613	4.9658e-05	0.00105075	yes	down	0.0817881	0.0920166	0.09292	0	0	0	0.0889083	0	0	0	XP_020947997.1
Chr05_104253525_104274170	MSTRG.14747	0.110819	-3.17372	0.000387127	0.00511788	yes	down	0.239073	0.153361	0.111504	0.0193771	0.0144376	0.0224163	0.167979	0.0187437	0	0	XP_020947997.1
Chr05_104505741_104506134	Pig.13247	2.80901	1.49006	0.0198873	0.0936576	yes	up	0.0692053	0.0383403	0	0.103344	0.115501	0.0821931	0.0358485	0.100346	LRP6-201	LOW QUALITY PROTEIN: low-density lipoprotein receptor-related protein 6 [Sus scrofa]	XP_020948003.1
Chr05_106667069_106690377	Pig.13290,MSTRG.14805	0.0140248	-6.15588	0.00033718	0.00465162	yes	down	0.0880795	0.0536764	0.130088	0	0	0	0.0906146	0	#N/A	#N/A	#N/A
Chr05_106668101_106696417	Pig.13290,MSTRG.14805	0.0387097	-4.69116	0.0440141	0.162954	yes	down	0.0188742	0.0230042	0.055752	0	0	0	0.0325435	0	#N/A	#N/A	#N/A
Chr05_106696908_106702791	Pig.13290,MSTRG.14805	0.0129612	-6.26966	0.000197821	0.00313938	yes	down	0.138411	0.122689	0.037168	0	0	0	0.0994225	0	#N/A	#N/A	#N/A
Chr05_106754199_106756664	Pig.13291,MSTRG.14807	0.0276654	-5.17577	0.000232716	0.00345896	yes	down	0.031457	0.0306722	0.074336	0	0	0	0.0454884	0	#N/A	#N/A	#N/A
Chr05_11188042_11212141	Pig.07621	0.0295736	-5.07955	0.00456136	0.0347462	yes	down	0.0251656	0.0536764	0.0495574	0	0	0	0.0427998	0	LARP4-202	la-related protein 4 isoform X1 [Sus scrofa]	XP_020947303.1
Chr05_20526478_20580658	Pig.19106	3.24849	1.69977	0.0109056	0.0626968	yes	up	0.031457	0.0460083	0.0123893	0.148557	0.0577505	0.0821931	0.0299515	0.096167	TBC1D22A-201	LOW QUALITY PROTEIN: TBC1 domain family member 22A [Sus scrofa]	XP_020947020.1
Chr05_20526478_20598492	Pig.19106	33.4345	5.06327	0.000213426	0.00326789	yes	up	0	0	0	0.0516721	0.0433129	0.0298884	0	0.0416245	TBC1D22A-201	LOW QUALITY PROTEIN: TBC1 domain family member 22A [Sus scrofa]	XP_020947020.1
Chr05_20526478_20617636	Pig.19106	11.5272	3.52696	0.0112003	0.0639091	yes	up	0	0	0.0123893	0.0581312	0.036094	0.0597768	0.00412978	0.051334	TBC1D22A-201	LOW QUALITY PROTEIN: TBC1 domain family member 22A [Sus scrofa]	XP_020947020.1
Chr05_21491058_21494054	Pig.14005	0.0372077	-4.74826	0.0283781	1	yes	down	0.0377484	0.0153361	0.0495574	0	0	0	0.0342139	0	PPARA-201	peroxisome proliferator-activated receptor alpha [Sus scrofa]	NP_001037991.1
Chr05_21492507_21494054	Pig.14005	0.0609986	-4.03508	0.00945744	0.0571762	yes	down	0.339735	0.23771	0.0619467	0.0387541	0	0	0.213131	0.012918	PPARA-201	peroxisome proliferator-activated receptor alpha [Sus scrofa]	NP_001037991.1
Chr05_21900001_21912003	Pig.14007	0.213423	-2.22821	0.0295053	0.123323	yes	down	0.0754967	0.0230042	0.0309733	0.012918	0	0.0149442	0.0431581	0.00928741	ATXN10-201	ataxin-10 isoform X1 [Sus scrofa]	XP_013852916.2
Chr05_25685145_25698587	MSTRG.13394,Pig.18996	0.019891	-5.65174	3.78872e-05	0.000848841	yes	down	0.0692053	0.0613444	0.0619467	0	0	0	0.0641655	0	#N/A	#N/A	#N/A
Chr05_28548500_28549466	Pig.17267	3.05554	1.61143	0.0191366	0.0915374	yes	up	0.0943709	0.0230042	0.0123893	0.142098	0.12272	0.134498	0.0432548	0.133105	PTGES3-201	PREDICTED: prostaglandin E synthase 3 isoform X1 [Mustela putorius furo]	TEA31711.1
Chr05_28637762_28651868	Pig.17270	0.167824	-2.57498	0.00732481	0.0481137	yes	down	0.0440398	0.0920166	0.0991147	0.0387541	0	0	0.0783904	0.012918	RBMS2-201	RNA-binding motif, single-stranded-interacting protein 2 [Sus scrofa]	XP_020948550.1
Chr05_28687240_28690035		0.0155415	-6.00773	3.5947e-05	0.000829777	yes	down	0.0943709	0.0460083	0.105309	0	0	0	0.0818962	0	#N/A	#N/A	#N/A
Chr05_31301375_31326900	Pig.05460	4.64548	2.21583	0.0205753	0.0963025	yes	up	0.0251656	0	0.0123893	0.0645902	0.0577505	0.0597768	0.0125183	0.0607058	XPOT-201	exportin-T isoform X1 [Sus scrofa]	XP_020947599.1
Chr05_31319211_31326900	Pig.05460	27.1012	4.76029	0.00294703	0.025656	yes	up	0	0	0	0.0645902	0.0144376	0.0224163	0	0.0338147	XPOT-201	exportin-T isoform X1 [Sus scrofa]	XP_020947599.1
Chr05_32183948_32204945		9.75065	3.2855	0.0421918	0.158966	yes	up	0	0	0	0	0	0.0373605	0	0.0124535	#N/A	#N/A	#N/A
Chr05_32183948_32242667		20.3384	4.34613	0.00671727	0.0454834	yes	up	0	0	0	0.0387541	0	0.0373605	0	0.0253715	#N/A	#N/A	#N/A
Chr05_35383986_35390007		11.7359	3.55286	0.0410743	0.157215	yes	up	0	0	0	0	0.0144376	0.0298884	0	0.0147753	#N/A	#N/A	#N/A
Chr05_36457974_36459199	Pig.05498	0.0264986	-5.23794	0.00017357	0.00290586	yes	down	0.0629139	0.0383403	0.0433627	0	0	0	0.0482056	0	RAB3IP	rab-3A-interacting protein isoform X1 [Sus scrofa]	XP_020947636.1
Chr05_43684815_43744217	Pig.06613	0.129291	-2.95131	0.000608942	0.00742178	yes	down	0.0629139	0.0920166	0.111504	0.012918	0	0.0224163	0.0888115	0.0117781	FGD4	FYVE, RhoGEF and PH domain-containing protein 4 isoform X1 [Sus scrofa]	XP_020947725.1
Chr05_43729794_43744217	Pig.06613	0.0993659	-3.33111	0.0255148	0.111368	yes	down	0.0440398	0.0536764	0.0433627	0	0.0144376	0	0.0470263	0.00481254	FGD4	FYVE, RhoGEF and PH domain-containing protein 4 isoform X1 [Sus scrofa]	XP_020947725.1
Chr05_48391369_48407553	Pig.06589	105.672	6.72345	1.33998e-06	6.28141e-05	yes	up	0	0	0	0.155016	0.158814	0.0821931	0	0.132008	ARNTL2-201	aryl hydrocarbon receptor nuclear translocator-like protein 2 isoform X1 [Sus scrofa]	XP_020947810.1
Chr05_48391369_48424370	Pig.06589	34.1442	5.09357	0.00455817	0.0347462	yes	up	0	0	0	0.0258361	0.0794069	0.0224163	0	0.0425531	ARNTL2-201	aryl hydrocarbon receptor nuclear translocator-like protein 2 isoform X1 [Sus scrofa]	XP_020947810.1
Chr05_51807575_51853508	Pig.06573	0.0893336	-3.48465	0.0140129	0.074639	yes	down	0.0440398	0.0306722	0.074336	0.012918	0	0	0.0496827	0.00430601	SOX5-201	transcription factor SOX-5 isoform X2 [Sus scrofa]	XP_020948580.1
Chr05_51935997_51953715	Pig.06573	0.0784825	-3.67149	5.732e-05	0.00118009	yes	down	0.0566225	0.337394	0.359291	0.0452131	0	0.0149442	0.251103	0.0200524	SOX5-201	transcription factor SOX-5 isoform X2 [Sus scrofa]	XP_020948580.1
Chr05_53692720_53703819	Pig.06566	15.5095	3.95508	0.00677851	0.045695	yes	up	0	0	0	0	0.0144376	0.0448326	0	0.0197567	ABCC9-201	ATP-binding cassette sub-family C member 9 isoform X5 [Sus scrofa]	XP_020947899.1
Chr05_54141653_54170120	MSTRG.13889,Pig.09598	0.014343	-6.12351	7.10021e-06	0.000231431	yes	down	0.100662	0.0536764	0.111504	0	0	0	0.0886142	0	#N/A	#N/A	#N/A
Chr05_54443877_54452846	Pig.09596	29.5864	4.88686	0.0127938	1	yes	up	0	0	0	0.0452131	0.0433129	0.0224163	0	0.0369808	PDE3A-201	PREDICTED: cGMP-inhibited 3',5'-cyclic phosphodiesterase A [Physeter catodon]	NP_998901.1
Chr05_60087028_60091213	Pig.09568	4.26793	2.09354	0.00539189	0.0393394	yes	up	0.031457	0.0153361	0.0619467	0.161475	0.0866257	0.231635	0.0362466	0.159912	ATF7IP-202	activating transcription factor 7-interacting protein 1 isoform X1 [Sus scrofa]	XP_005664117.1
Chr05_65803355_65828340		0.0237429	-5.39636	0.00870004	1	yes	down	0.0943709	0.0383403	0.0309733	0	0	0	0.0545615	0	#N/A	#N/A	#N/A
Chr05_66635943_66647337	Pig.07503	0.121975	-3.03535	0.00364527	0.0294619	yes	down	0.0817881	0.0996847	0.0495574	0	0.0288752	0	0.07701	0.00962508	ERC1-203	ELKS/Rab6-interacting/CAST family member 1 isoform X3 [Sus scrofa]	XP_020948632.1
Chr05_66635943_66654569	Pig.07503	0.468891	-1.09268	0.0486866	0.173804	yes	down	0.132119	0.245378	0.123893	0.0258361	0.0866257	0.127026	0.16713	0.0798292	ERC1-203	ELKS/Rab6-interacting/CAST family member 1 isoform X3 [Sus scrofa]	XP_020948632.1
Chr05_66680893_66724289	Pig.07503	0.0388306	-4.68666	0.00942856	1	yes	down	0.0503312	0.0306722	0.018584	0	0	0	0.0331958	0	ERC1-203	ELKS/Rab6-interacting/CAST family member 1 isoform X3 [Sus scrofa]	XP_020948632.1
Chr05_68026189_68027246	Pig.07513	8.49901	3.08729	0.00267565	0.0236665	yes	up	0.0188742	0	0	0.0452131	0.0794069	0.0448326	0.00629139	0.0564842	CECR2-201	LOW QUALITY PROTEIN: cat eye syndrome critical region protein 2 [Sus scrofa]	XP_020948162.1
Chr05_72050161_72071860	Pig.07534	3.68676	1.88235	0.00314928	0.0269405	yes	up	0.0188742	0.0153361	0.0495574	0.12918	0.0794069	0.112081	0.0279225	0.10689	PPHLN1-201	periphilin-1 isoform X1 [Sus scrofa]	XP_020948207.1
Chr05_78171662_78194922	Pig.13110	0.0165781	-5.91458	8.85427e-05	0.001687	yes	down	0.0440398	0.0920166	0.09292	0	0	0	0.0763255	0	SLC41A2-201	LOW QUALITY PROTEIN: solute carrier family 41 member 2 [Sus scrofa]	XP_005664240.2
Chr05_78188886_78207469	Pig.13110	0.15734	-2.66804	0.00870808	0.0538205	yes	down	0.132119	0.0843486	0.0433627	0.0258361	0.0144376	0	0.0866102	0.0134246	SLC41A2-201	LOW QUALITY PROTEIN: solute carrier family 41 member 2 [Sus scrofa]	XP_005664240.2
Chr05_80967616_80976108	Pig.04041	6.56153	2.71403	0.0492955	0.175062	yes	up	0.0125828	0	0	0.012918	0.0216564	0.0523047	0.00419426	0.0289597	WASHC3-203	WASH complex subunit 3 isoform X1 [Sus scrofa]	XP_020948336.1
Chr05_84175407_84176240	MSTRG.14449,Pig.04063	0.426848	-1.22821	0.0267549	0.114982	yes	down	0.144702	0.130357	0.142477	0.0775082	0.0505317	0.0523047	0.139179	0.0601149	#N/A	#N/A	#N/A
Chr05_84222887_84232145	Pig.04064	16.5973	4.05287	0.0277313	1	yes	up	0	0	0	0.0322951	0	0.0298884	0	0.0207278	TMPO-202	thymopoietin [Sus scrofa]	NP_001335683.1
Chr05_86446353_86447618	MSTRG.14491	0.081172	-3.62287	0.0377945	0.148211	yes	down	0.0251656	0.0230042	0	0	0	0	0.0160566	0	0	0	XP_001925096.2
Chr05_87087100_87106917		0.0518414	-4.26975	0.0130085	0.0711615	yes	down	0.031457	0.0306722	0.0123893	0	0	0	0.0248395	0	#N/A	#N/A	#N/A
Chr05_99164719_99181403	MSTRG.14656,Pig.11752	0.116622	-3.10009	5.14649e-06	0.000178197	yes	down	0.220199	0.130357	0.179645	0.0258361	0.036094	0	0.176734	0.0206434	#N/A	#N/A	#N/A
Chr05_99164719_99196171	MSTRG.14656,Pig.11752	0.0415584	-4.58871	0.0024562	0.0222739	yes	down	0.031457	0.0230042	0.037168	0	0	0	0.030543	0	#N/A	#N/A	#N/A
Chr05_99164719_99208044	MSTRG.14656,Pig.11752	0.0964128	-3.37463	0.047029	0.170795	yes	down	0.0251656	0.0153361	0	0	0	0	0.0135006	0	#N/A	#N/A	#N/A
Chr06_101805189_101814144	Pig.08532	0.084562	-3.56385	0.038818	0.150673	yes	down	0.0692053	0	0.0867254	0.012918	0	0	0.0519769	0.00430601	RERE	arginine-glutamic acid dipeptide (RE) repeats, isoform CRA_c [Homo sapiens]	ELR58553.1
Chr06_101805189_101839069	Pig.08532	0.028927	-5.11144	0.00140147	0.01414	yes	down	0.0125828	0.0690125	0.0495574	0	0	0	0.0437175	0	RERE	arginine-glutamic acid dipeptide (RE) repeats, isoform CRA_c [Homo sapiens]	ELR58553.1
Chr06_10288787_10295546	Pig.14717	0.112248	-3.15524	0.0240252	0.107025	yes	down	0.0629139	0.0460083	0.018584	0	0	0.0149442	0.0425021	0.0049814	ZYG11B-201	protein zyg-11 homolog B [Sus scrofa]	XP_020952290.1
Chr06_10402432_10406397	Pig.14715	0.0254656	-5.29531	0.000700831	0.00832007	yes	down	0.0377484	0.0690125	0.0433627	0	0	0	0.0500412	0	ECHDC2-201	enoyl-CoA hydratase domain-containing protein 2, mitochondrial isoform X5 [Sus scrofa]	XP_020952280.1
Chr06_108820298_108820413	Pig.16623	0.00447337	-7.80442	6.30704e-09	5.05725e-07	yes	down	0.327153	0.207037	0.322123	0	0	0	0.285438	0	A1BG	alpha-1B-glycoprotein [Sus scrofa]	XP_003128180.1
Chr06_11538093_11556397		42.7881	5.41914	0.000299641	0.00430889	yes	up	0	0	0	0.0581312	0.0721881	0.0298884	0	0.0534026	#N/A	#N/A	#N/A
Chr06_116825520_116839690	Pig.20473	0.0198845	-5.65221	0.000351872	0.00478641	yes	down	0.0188742	0.0460083	0.123893	0	0	0	0.0629253	0	MYH14-201	myosin-14 isoform X2 [Sus scrofa]	XP_020950441.1
Chr06_117850632_117851180	MSTRG.17397,Pig.20055	0.358344	-1.48058	0.0298257	0.124321	yes	down	0.0251656	0.122689	0.136283	0.0452131	0.036094	0.0224163	0.0947124	0.0345745	#N/A	#N/A	#N/A
Chr06_119254850_119273969	MSTRG.17506	42.5889	5.41241	0.0029181	0.0255502	yes	up	0	0	0	0.0645902	0.0577505	0.0373605	0	0.0532337	0	0	XP_020950281.1
Chr06_119270099_119273969	MSTRG.17506	43.9729	5.45854	0.0409075	1	yes	up	0	0	0	0.122721	0.0288752	0.0149442	0	0.0555136	0	0	XP_020950281.1
Chr06_124342503_124342926	Pig.16121	0.32341	-1.62856	0.0166153	0.0837843	yes	down	0.100662	0.0843486	0.148672	0.0581312	0.036094	0.0149442	0.111228	0.0363898	ECH1-202	delta(3,5)-Delta(2,4)-dienoyl-CoA isomerase, mitochondrial [Sus scrofa]	NP_001038072.1(delta(3,5)-Delta
Chr06_12458471_12462570	Pig.12444	0.0129093	-6.27544	2.14285e-06	9.08803e-05	yes	down	0.0943709	0.0766805	0.123893	0	0	0	0.0983149	0	DHCR24-202	delta(24)-sterol reductase [Sus scrofa]	NP_001230283.1(delta
Chr06_125971884_125972374	Pig.16043	10.9761	3.45629	0.0365536	0.14501	yes	up	0	0	0	0.0258361	0	0.0149442	0	0.0135934	ZNF568	PREDICTED: zinc finger protein 568-like isoform X1 [Balaenoptera acutorostrata scammoni]	XP_020952805.1
Chr06_12662112_12666692	Pig.12446	0.0531063	-4.23497	0.0425914	0.159856	yes	down	0.0188742	0.0536764	0	0	0	0	0.0241835	0	USP24-201	ubiquitin carboxyl-terminal hydrolase 24 isoform X1 [Sus scrofa]	XP_020953471.1
Chr06_128194551_128197407	Pig.15966	0.411886	-1.27968	0.000954994	0.0105813	yes	down	0.207616	0.199369	0.272565	0.12918	0.0721881	0.0821931	0.226517	0.0945205	LSM14A-201	protein LSM14 homolog A [Sus scrofa]	NP_001302727.1
Chr06_134537417_134552372	MSTRG.18159,Pig.13994	0.268899	-1.89486	0.000951031	0.0105759	yes	down	0.188742	0.168697	0.0805307	0.0516721	0.036094	0.0298884	0.14599	0.0392182	#N/A	#N/A	#N/A
Chr06_137020965_137029577	Pig.15005	11.7413	3.55352	0.0258591	0.1124	yes	up	0	0	0	0	0	0.0448326	0	0.0149442	HEATR3-201	HEAT repeat-containing protein 3 isoform X1 [Sus scrofa]	XP_020949878.1
Chr06_137662247_137667769		0.331694	-1.59207	0.0477527	0.172396	yes	down	0.0503312	0.0690125	0.0309733	0	0.0288752	0.0224163	0.0501057	0.0170972	#N/A	#N/A	#N/A
Chr06_139797251_139814742	MSTRG.18233	0.0360523	-4.79377	0.0272271	1	yes	down	0.0440398	0	0.0619467	0	0	0	0.0353288	0	0	0	XP_020949833.1
Chr06_14381044_14387920	Pig.12451	0.0162549	-5.94298	0.000308281	0.00436898	yes	down	0.0629139	0.122689	0.0495574	0	0	0	0.0783867	0	FYB2-201	activation-dependent, raft-recruited ADAP-like phosphoprotein isoform X1 [Sus scrofa]	XP_020952236.1
Chr06_14477450_14494363	MSTRG.15243	0.00460747	-7.76181	3.23856e-08	2.24271e-06	yes	down	0.320861	0.245378	0.266371	0	0	0	0.277536	0	0	0	NP_001090919.2
Chr06_151965136_151966420	MSTRG.18461,Pig.13733	0.057298	-4.12537	0.00784488	0.0502171	yes	down	0.0188742	0.0230042	0.0247787	0	0	0	0.022219	0	#N/A	#N/A	#N/A
Chr06_153612359_153623429	MSTRG.18532	0.00182187	-9.10036	4.78877e-05	0.00103169	yes	down	0.861921	0.958506	0.291149	0	0	0	0.703859	0	0	0	XP_020949549.1
Chr06_153612359_153633119		0.0276111	-5.17861	0.00671296	0.0454834	yes	down	0.031457	0.107353	0	0	0	0	0.0462699	0	#N/A	#N/A	#N/A
Chr06_153617949_153633119		0.0324663	-4.94491	0.00773009	0.0495865	yes	down	0.0503312	0.0690125	0	0	0	0	0.0397812	0	#N/A	#N/A	#N/A
Chr06_154116588_154120137	Pig.12804	0.0364859	-4.77652	0.00658879	1	yes	down	0.0251656	0.0613444	0.018584	0	0	0	0.0350313	0	CDH1-203	cadherin-1 precursor [Sus scrofa]	NP_001156532.1
Chr06_154116588_154127479	Pig.12804	0.0326919	-4.93492	0.0139171	1	yes	down	0.0188742	0.0536764	0.0433627	0	0	0	0.0386377	0	CDH1-203	cadherin-1 precursor [Sus scrofa]	NP_001156532.1
Chr06_155000411_155008064		0.0637915	-3.97049	5.06653e-06	0.000177445	yes	down	0.18245	0.115021	0.142477	0	0	0.0298884	0.14665	0.0099628	#N/A	#N/A	#N/A
Chr06_155000411_155043253		0.0327355	-4.933	0.0426873	1	yes	down	0.0377484	0.0230042	0.055752	0	0	0	0.0388348	0	#N/A	#N/A	#N/A
Chr06_155000411_155071136		0.0419626	-4.57475	0.0231395	1	yes	down	0.0188742	0.0153361	0.055752	0	0	0	0.0299874	0	#N/A	#N/A	#N/A
Chr06_157262381_157268589	MSTRG.18617	0.0319824	-4.96658	0.00546744	0.0396249	yes	down	0.0377484	0	0.0805307	0	0	0	0.0394264	0	0	0	XP_020949508.1
Chr06_157272705_157273018	MSTRG.18617	0.0504227	-4.30978	0.0306189	1	yes	down	0.0188742	0	0.055752	0	0	0	0.0248754	0	0	0	XP_020949508.1
Chr06_160725112_160742417	Pig.15713	3.10486	1.63453	0.0079022	0.0504338	yes	up	0.0566225	0.0383403	0.055752	0.161475	0.158814	0.156914	0.0502383	0.159068	CFDP1-201	craniofacial development protein 1 [Sus scrofa]	XP_020949434.1
Chr06_16853479_16911354		0.0385126	-4.69853	0.039367	1	yes	down	0.0503312	0	0.0495574	0	0	0	0.0332962	0	#N/A	#N/A	#N/A
Chr06_16875956_16911354	Pig.15137	0.0392776	-4.67015	2.1013e-05	0.000524807	yes	down	0.213907	0.0843486	0.216813	0.0193771	0	0	0.17169	0.00645902	FGGY-202	FGGY carbohydrate kinase domain-containing protein isoform X5 [Sus scrofa]	XP_020953459.1
Chr06_169608196_169618090	Pig.15499	0.200851	-2.3158	0.000408959	0.00530255	yes	down	0.0817881	0.115021	0.0805307	0.0193771	0.0144376	0.0224163	0.0924465	0.0187437	MTHFSD-201	methenyltetrahydrofolate synthase domain-containing protein isoform X1 [Sus scrofa]	XP_020949357.1
Chr06_31134444_31151568	Pig.05297	37.314	5.22165	0.0107958	1	yes	up	0	0	0	0.0516721	0.0433129	0.0448326	0	0.0466059	LRRIQ3-201	leucine-rich repeat and IQ domain-containing protein 3 isoform X1 [Sus scrofa]	XP_020952137.1
Chr06_32614019_32620129	Pig.05306	0.0641815	-3.9617	0.0139676	0.0745348	yes	down	0.0125828	0.0153361	0.0309733	0	0	0	0.0196307	0	ACADM-205	RecName: Full=Medium-chain specific acyl-CoA dehydrogenase, mitochondrial; Short=MCAD; Flags: PrecursorAAW30430.1 medium-chain acyl-coA dehydrogenase [Sus scrofa]	P41367.3
Chr06_34537456_34546764		3.77498	1.91647	0.0368207	0.145458	yes	up	0.0377484	0.0153361	0.018584	0.0839672	0.108282	0.0821931	0.0238895	0.0914808	#N/A	#N/A	#N/A
Chr06_34537471_34546764		4.35586	2.12296	0.000337384	0.00465162	yes	up	0.0566225	0.0766805	0.0867254	0.348787	0.42591	0.201747	0.0733428	0.325481	#N/A	#N/A	#N/A
Chr06_3710003_3758580	MSTRG.14981	0.279321	-1.84	8.17699e-06	0.000255949	yes	down	0.213907	0.245378	0.402653	0.0645902	0.129939	0.0523047	0.287313	0.0822778	0	0	XP_003128092.3
Chr06_3732683_3758580	MSTRG.14981	0.145741	-2.77852	1.90964e-06	8.31241e-05	yes	down	0.163576	0.115021	0.235397	0.0387541	0.0144376	0.0224163	0.171331	0.0252027	0	0	XP_003128092.3
Chr06_40368775_40376408		40.7941	5.35029	5.77712e-05	0.0011814	yes	up	0	0	0	0.0645902	0.0577505	0.0298884	0	0.050743	#N/A	#N/A	#N/A
Chr06_40375921_40376408		16.9112	4.07991	0.00430208	0.0333548	yes	up	0	0	0	0.0193771	0.0216564	0.0224163	0	0.0211499	#N/A	#N/A	#N/A
Chr06_49238260_49238933	Pig.02789	14.2964	3.83758	7.21391e-09	5.6361e-07	yes	up	0	0.0306722	0.037168	0.303574	0.332065	0.343716	0.0226134	0.326452	KIAA1328-202	protein hinderin isoform X5 [Sus scrofa]	XP_020951945.1
Chr06_54767318_54781593	Pig.03600	69.066	6.1099	0.000176323	0.00291986	yes	up	0	0	0	0.0452131	0.115501	0.0971373	0	0.0859505	B4GALT6-201	beta-1,4-galactosyltransferase 6 [Sus scrofa]	XP_003127934.2
Chr06_54767318_54799712	Pig.03600	28.808	4.8484	7.31777e-05	0.00142931	yes	up	0.0188742	0	0	0.232525	0.137157	0.194275	0.00629139	0.187986	B4GALT6-201	beta-1,4-galactosyltransferase 6 [Sus scrofa]	XP_003127934.2
Chr06_54767318_54808170	Pig.03600	62.0429	5.95519	0.00181477	0.0174987	yes	up	0	0	0	0.116262	0.0721881	0.0448326	0	0.077761	B4GALT6-201	beta-1,4-galactosyltransferase 6 [Sus scrofa]	XP_003127934.2
Chr06_59501294_59527059	Pig.03615	11.1632	3.48068	2.69785e-07	1.64407e-05	yes	up	0.0125828	0	0.0433627	0.316492	0.209345	0.14197	0.0186485	0.222602	TAF4B-201	transcription initiation factor TFIID subunit 4B [Sus scrofa]	XP_003127923.1
Chr06_61228450_61283077	MSTRG.15623,Pig.03622	5.18033	2.37304	0.00018629	0.00301929	yes	up	0.031457	0.0383403	0.018584	0.187312	0.18047	0.0896652	0.0294604	0.152482	#N/A	#N/A	#N/A
Chr06_61490852_61503632	Pig.03624	0.0778699	-3.68279	0.000210716	0.00325915	yes	down	0.188742	0.168697	0.0867254	0.012918	0.0216564	0	0.148055	0.0115248	TTC39C-202	tetratricopeptide repeat protein 39C isoform X1 [Sus scrofa]	XP_003356432.3
Chr06_6319537_6337357	Pig.12596	34.3104	5.10057	0.00175259	0.0170069	yes	up	0	0	0	0.0322951	0.0288752	0.0672489	0	0.0428064	SPATA6-201	spermatogenesis-associated protein 6 [Sus scrofa]	NP_001171388.1
Chr06_63426858_63485048	Pig.03641	4.51376	2.17433	0.0339966	0.13684	yes	up	0.0125828	0.0230042	0	0.0452131	0.0288752	0.0821931	0.0118623	0.0520938	MIB1-201	PREDICTED: E3 ubiquitin-protein ligase MIB1 [Oryctolagus cuniculus]	XP_002713497.1
Chr06_63684586_63715863	Pig.03644	18.8086	4.23332	0.0155283	1	yes	up	0	0	0	0.0193771	0.036094	0.0149442	0	0.0234718	ESCO1-202	N-acetyltransferase ESCO1 [Sus scrofa]	XP_003127900.1
Chr06_64342937_64360426	Pig.03652	4.81526	2.26761	0.0469504	0.17077	yes	up	0.0125828	0	0.0123893	0.0452131	0.0216564	0.0597768	0.00832404	0.0422154	THOC1-201	THO complex subunit 1 isoform X1 [Sus scrofa]	XP_020951816.1
Chr06_66564283_66595285	Pig.03664	5.19373	2.37677	0.0489363	0.174193	yes	up	0.0188742	0	0.0247787	0.109803	0.036094	0.0896652	0.014551	0.0785208	SMCHD1-201	structural maintenance of chromosomes flexible hinge domain-containing protein 1 isoform X1 [Sus scrofa]	XP_020951796.1
Chr06_71794909_71807159	Pig.03687	0.046176	-4.43671	0.00247245	0.0223547	yes	down	0.031457	0.0536764	0	0	0	0	0.0283778	0	ANKRD12-201	ankyrin repeat domain-containing protein 12 isoform X1 [Sus scrofa]	XP_020951722.1
Chr06_770215_796587		0.0792017	-3.65833	0.00988691	0.0585798	yes	down	0.0440398	0.0306722	0.09292	0.012918	0	0	0.0558773	0.00430601	#N/A	#N/A	#N/A
Chr06_78493883_78508305	Pig.03001	0.0324172	-4.9471	0.00116643	0.012298	yes	down	0.0251656	0.0230042	0.0681414	0	0	0	0.0387704	0	AGO1-202	protein argonaute-3 [Bos taurus]	NP_001001133.2
Chr06_785554_796587	Pig.18898	0.272921	-1.87345	0.024933	0.109689	yes	down	0.0692053	0.0690125	0.0619467	0.0322951	0	0.0224163	0.0667215	0.0182371	Ccdc30	coiled-coil domain-containing protein 30 [Sus scrofa]	XP_020952582.1
Chr06_79097366_79139280	Pig.03010	25.8739	4.69343	0.0196775	0.0933913	yes	up	0	0	0	0.0387541	0.0433129	0.0149442	0	0.0323371	ZMYM4-201	zinc finger MYM-type protein 4 isoform X2 [Sus scrofa]	XP_020951559.1
Chr06_79118478_79127999	Pig.03010	2.9526	1.56198	0.00539271	0.0393394	yes	up	0.0377484	0.0230042	0.0619467	0.103344	0.137157	0.134498	0.0408997	0.125	ZMYM4-201	zinc finger MYM-type protein 4 isoform X2 [Sus scrofa]	XP_020951559.1
Chr06_82809042_82811064	Pig.03074	0.0819831	-3.60853	0.029479	0.123323	yes	down	0.0125828	0.0153361	0.018584	0	0	0	0.015501	0	SNRNP40-202	PREDICTED: U5 small nuclear ribonucleoprotein 40 kDa protein [Equus caballus]	XP_003356314.1
Chr06_83066754_83069199	Pig.03076	0.0672498	-3.89433	0.0122937	0.0679834	yes	down	0.0377484	0	0.018584	0	0	0	0.0187775	0	PUM1-201	pumilio homolog 1 isoform X17 [Sus scrofa]	XP_020951410.1
Chr06_88283975_88304574	Pig.03165	0.0939338	-3.41221	0.0209065	0.0972549	yes	down	0.0629139	0.0306722	0.055752	0	0.0144376	0	0.0497794	0.00481254	CLIC4-201	chloride intracellular channel protein 4 [Bos taurus]	NP_001073687.1
Chr06_89512529_89516131	Pig.03192	0.0316734	-4.98058	0.00102046	0.0111446	yes	down	0.0377484	0.0460083	0.037168	0	0	0	0.0403082	0	HNRNPR-201	heterogeneous nuclear ribonucleoprotein R isoform X2 [Heterocephalus glaber]	XP_020951171.1
Chr06_9306511_9324795	Pig.14732	0.0644981	-3.9546	0.01768	0.0863318	yes	down	0.0188742	0.0153361	0.0247787	0	0	0	0.019663	0	OSBPL9-202	oxysterol-binding protein-related protein 9 isoform X1 [Sus scrofa]	XP_005665492.2
Chr06_9307653_9327220	Pig.14732	0.223971	-2.15862	0.0443451	0.16398	yes	down	0.0251656	0.0306722	0.09292	0.0193771	0.0144376	0	0.0495859	0.0112716	OSBPL9-202	oxysterol-binding protein-related protein 9 isoform X1 [Sus scrofa]	XP_005665492.2
Chr06_93157223_93157410	Pig.03249	24.4632	4.61254	0.0113526	1	yes	up	0	0	0	0.0258361	0.0433129	0.0224163	0	0.0305217	UBR4-201	LOW QUALITY PROTEIN: E3 ubiquitin-protein ligase UBR4 [Sus scrofa]	XP_020951123.1
Chr06_96042171_96051495	Pig.08606	0.0637364	-3.97174	0.0109329	1	yes	down	0.0251656	0.0230042	0.0123893	0	0	0	0.0201864	0	DDI1-201	PREDICTED: protein DDI1 homolog 2 isoform X2 [Orcinus orca]	XP_012389449.1
Chr06_96048045_96062663	Pig.08606	0.106945	-3.22506	1.52109e-05	0.000406559	yes	down	0.176159	0.107353	0.223008	0.0322951	0.0216564	0	0.16884	0.0179838	DDI1-201	PREDICTED: protein DDI1 homolog 2 isoform X2 [Orcinus orca]	XP_012389449.1
Chr06_97673903_97683457	Pig.08596	31.2791	4.96713	0.00994218	0.0587089	yes	up	0	0	0	0.0581312	0.0144376	0.0448326	0	0.0391338	PRDM2-202	LOW QUALITY PROTEIN: PR domain zinc finger protein 2 [Sus scrofa]	XP_020953220.1
Chr06_98861647_98869027		0.240368	-2.05669	0.0146005	0.0765708	yes	down	0.031457	0.107353	0.117699	0.0193771	0.0288752	0.0149442	0.0855028	0.0210655	#N/A	#N/A	#N/A
Chr06_9953190_9955184	Pig.14721	15.7661	3.97876	0.0382186	0.149489	yes	up	0	0	0	0	0.0216564	0.0373605	0	0.0196723	TUT4-202	terminal uridylyltransferase 4 isoform X4 [Sus scrofa]	XP_020952296.1
Chr07_104353059_104373328		0.0167196	-5.90232	1.19902e-05	0.000329137	yes	down	0.0692053	0.0460083	0.111504	0	0	0	0.0755726	0	#N/A	#N/A	#N/A
Chr07_113801960_113803642	Pig.09320	3.24605	1.69869	0.0263365	0.113987	yes	up	0.031457	0	0.0309733	0.116262	0.036094	0.0597768	0.0208101	0.0707111	BICRAL-201	GLTSCR1-like protein [Sus scrofa]	XP_003356680.2
Chr07_121154190_121180103	Pig.17302	0.0281523	-5.1506	0.000491587	0.00613879	yes	down	0.0377484	0.0613444	0.037168	0	0	0	0.0454203	0	ILRUN-201	uncharacterized protein C6orf106 homolog isoform 2 [Mus musculus]	NP_001038184.1
Chr07_123113518_123127062		6.75872	2.75675	0.0401024	0.15487	yes	up	0	0	0.0123893	0.0387541	0.0216564	0.0298884	0.00412978	0.0300996	#N/A	#N/A	#N/A
Chr07_125086601_125090022	Pig.13357	0.0648313	-3.94717	0.00318126	0.0270762	yes	down	0.0125828	0	0.0433627	0	0	0	0.0186485	0	MLIP-201	muscular LMNA-interacting protein isoform X3 [Sus scrofa]	XP_020954178.1
Chr07_125133345_125157395	Pig.13357	11.1973	3.48508	0.0169999	0.0850553	yes	up	0	0	0	0.0193771	0	0.0224163	0	0.0139311	MLIP-201	muscular LMNA-interacting protein isoform X3 [Sus scrofa]	XP_020954178.1
Chr07_127317226_127327861	Pig.11473	95.8033	6.582	0.000171421	0.00288574	yes	up	0	0	0	0.103344	0.18047	0.074721	0	0.119512	Tnxb	tenascin-X isoform X5 [Sus scrofa]	XP_020953995.1
Chr07_127317226_127328596	Pig.11473	82.7514	6.37071	1.17019e-05	0.000324141	yes	up	0	0	0	0.0968853	0.108282	0.104609	0	0.103259	Tnxb	tenascin-X isoform X5 [Sus scrofa]	XP_020953995.1
Chr07_20538732_20548703		0.311437	-1.68299	0.00017006	0.00288574	yes	down	0.163576	0.199369	0.235397	0.0581312	0.0721881	0.0597768	0.199448	0.0633653	#N/A	#N/A	#N/A
Chr07_23444137_23455147	Pig.19585	3.96347	1.98677	0.000742145	0.00876479	yes	up	0.0251656	0.0536764	0.0123893	0.0968853	0.115501	0.14197	0.0304104	0.118119	TUBB2B-205	Tubulin beta-2A chain [Fukomys damarensis]	XP_025838410.1
Chr07_27239271_27251522	Pig.18239	7.97196	2.99493	0.0496761	0.175607	yes	up	0	0.0153361	0	0.0193771	0.0577505	0.0373605	0.00511203	0.0381627	KLC4-201	kinesin light chain 1 isoform X3 [Sus scrofa]	XP_020937194.1
Chr07_27536734_27537380	Pig.18233	0.311322	-1.68352	0.0488556	0.174109	yes	down	0.0377484	0.0460083	0.0495574	0.012918	0.0144376	0.0149442	0.044438	0.0141	EIF5	PREDICTED: eukaryotic translation initiation factor 5 isoform X1 [Myotis lucifugus]	XP_015455206.1
Chr07_29778850_29779243		0.122828	-3.02529	0.0405833	0.155863	yes	down	0	0	0.111504	0	0	0.0149442	0.037168	0.0049814	#N/A	#N/A	#N/A
Chr07_33696516_33706280	Pig.19099	10.9871	3.45774	0.00548792	0.0396249	yes	up	0	0	0.0123893	0.0452131	0.0721881	0.0298884	0.00412978	0.0490965	PAPOLA-201	poly(A) polymerase alpha isoform X4 [Sus scrofa]	XP_001929110.1(poly
Chr07_35015014_35023525	Pig.20280	24.0235	4.58637	0.0140607	0.074639	yes	up	0	0	0	0.0387541	0.0288752	0.0224163	0	0.0300152	DICER1-203	endoribonuclease Dicer isoform X1 [Sus scrofa]	XP_020953825.1
Chr07_35410729_35446616	MSTRG.19801	6.31024e-11	-33.8835	2.25698e-06	9.29325e-05	yes	down	2.1202	2.39243	4.89379	0	0	0	3.13547	0	0	0	XP_001928879.1
Chr07_35415757_35450947	MSTRG.19801	5.50445e-11	-34.0806	8.37118e-13	1.82193e-10	yes	down	4.72484	6.04242	4.93096	0	0	0	5.23274	0	0	0	XP_001928879.1
Chr07_35429135_35449112	MSTRG.19801	0.00268444	-8.54116	0.00740158	0.0482333	yes	down	6.33543	4.90755	4.80706	0	0.0433129	0	5.35002	0.0144376	0	0	XP_001928879.1
Chr07_35448459_35546999		8.39944e-05	-13.5393	1.76099e-21	2.68286e-18	yes	down	12.9414	17.9969	14.4274	0	0	0	15.1219	0	#N/A	#N/A	#N/A
Chr07_35477234_35532048		0.000686394	-10.5087	3.72678e-06	0.000135184	yes	down	1.18907	1.35724	2.97344	0	0	0	1.83992	0	#N/A	#N/A	#N/A
Chr07_36723571_36725562		20.1683	4.33402	3.34637e-15	1.13293e-12	yes	up	0.0503312	0	0.0123893	0.542558	0.454785	0.343716	0.0209068	0.44702	#N/A	#N/A	#N/A
Chr07_4174021_4175523		0.0300625	-5.05589	0.00105805	0.0113918	yes	down	0.0377484	0.0460083	0.0433627	0	0	0	0.0423731	0	#N/A	#N/A	#N/A
Chr07_4187796_4228953		0.0222538	-5.4898	0.0345245	1	yes	down	0.100662	0.0306722	0.0433627	0	0	0	0.0582324	0	#N/A	#N/A	#N/A
Chr07_4216731_4224186	Pig.15418	0.0187508	-5.73691	0.000496523	0.00617512	yes	down	0.0880795	0.0613444	0.055752	0	0	0	0.068392	0	SLC17A3-202	sodium-dependent phosphate transport protein 4 isoform X1 [Sus scrofa]	XP_020954076.1
Chr07_4267797_4268205	Pig.15419	0.00433295	-7.85043	3.30126e-10	3.24482e-08	yes	down	0.207616	0.414075	0.260176	0	0	0	0.293956	0	SLC17A1-202	sodium-dependent phosphate transport protein 1 isoform X1 [Sus scrofa]	XP_020953970.1
Chr07_4302776_4309255	Pig.15420	0.0177584	-5.81535	0.000797088	0.00934125	yes	down	0.119536	0.0996847	0	0	0	0	0.0730737	0	SLC17A4-205	probable small intestine urate exporter isoform X3 [Sus scrofa]	XP_020954070.1
Chr07_47929696_47931535	Pig.08875	0.0697554	-3.84155	0.0458843	0.167839	yes	down	0.0251656	0.0306722	0	0	0	0	0.0186126	0	STON2-202	stonin-2 isoform X2 [Sus scrofa]	XP_020955239.1
Chr07_48371790_48417308	Pig.08878	0.091855	-3.4445	0.017569	0.0859275	yes	down	0.0125828	0.176365	0.0433627	0	0	0.0224163	0.0774369	0.0074721	CEP128-201	centrosomal protein of 128 kDa isoform X4 [Sus scrofa]	XP_020955223.1
Chr07_57467134_57478320	Pig.04346	0.0398357	-4.6498	0.0155773	0.0807212	yes	down	0.0251656	0.0460083	0.0247787	0	0	0	0.0319842	0	PCNX1-201	pecanex-like protein 1 isoform X1 [Sus scrofa]	XP_020955078.1
Chr07_59192667_59200006	Pig.04323	0.451469	-1.1473	0.0225899	0.102428	yes	down	0.0943709	0.107353	0.117699	0.0581312	0.0649693	0.0224163	0.106474	0.0485056	DCAF5-201	DDB1- and CUL4-associated factor 5 isoform X1 [Sus scrofa]	XP_020955057.1
Chr07_61199248_61296019	Pig.04303	0.431495	-1.21258	0.0130813	0.0714312	yes	down	0.163576	0.145693	0.136283	0.0904263	0.036094	0.0672489	0.148517	0.0645897	GPHN-207	gephyrin isoform X1 [Sus scrofa]	XP_020953661.1
Chr07_61242972_61296019	Pig.04303	0.438605	-1.18901	0.00341241	0.0284866	yes	down	0.106954	0.199369	0.154867	0.0581312	0.0794069	0.0672489	0.15373	0.0682623	GPHN-207	gephyrin isoform X1 [Sus scrofa]	XP_020953661.1
Chr07_65997087_65998341	MSTRG.20331,Pig.04276	0.357251	-1.48499	0.0375639	0.147496	yes	down	0.0943709	0.0613444	0.018584	0.0387541	0	0.0224163	0.0580998	0.0203901	#N/A	#N/A	#N/A
Chr07_66020931_66031992	Pig.04276	0.126078	-2.98761	0.0166254	0.0837843	yes	down	0.0251656	0.0460083	0.037168	0.012918	0	0	0.036114	0.00430601	CHD2	chromodomain-helicase-DNA-binding protein 2 isoform X1 [Sus scrofa]	XP_013833723.1
Chr07_76699515_76701804	Pig.10973	0.267047	-1.90483	0.0226743	0.102657	yes	down	0.0503312	0.0690125	0.037168	0.012918	0.0288752	0	0.0521705	0.0139311	CHD8-201	chromodomain-helicase-DNA-binding protein 8 isoform X3 [Sus scrofa]	XP_003482311.2
Chr07_78844713_78845999	Pig.09731	0.0763861	-3.71055	0.0423053	1	yes	down	0.031457	0	0.018584	0	0	0	0.0166803	0	IRF9-203	interferon regulatory factor 9 [Sus scrofa]	XP_008707015.1
Chr07_85433213_85452842	Pig.08415	13.9925	3.80658	2.03367e-05	0.000518058	yes	up	0.031457	0	0	0.142098	0.137157	0.17933	0.0104857	0.152862	STRN-201	striatin-3 isoform X1 [Sus scrofa]	XP_020955544.1
Chr07_85446229_85452842	Pig.08415	4.36852	2.12715	0.00395204	0.0310358	yes	up	0.0503312	0	0.037168	0.109803	0.137157	0.149442	0.0291664	0.132134	STRN-201	striatin-3 isoform X1 [Sus scrofa]	XP_020955544.1
Chr07_85797913_85806784		3.42848	1.77757	0.000407773	0.00530255	yes	up	0.031457	0.0460083	0.055752	0.213148	0.12272	0.127026	0.0444058	0.154298	#N/A	#N/A	#N/A
Chr07_86387061_86413156		10.1115	3.33792	0.000484118	0.0060704	yes	up	0.0125828	0	0.037168	0.193771	0.202127	0.134498	0.0165836	0.176798	#N/A	#N/A	#N/A
Chr07_88769017_88792416	Pig.08431	8.04222	3.00759	0.0405242	0.155863	yes	up	0	0	0.0123893	0.0193771	0.0505317	0.0373605	0.00412978	0.0357564	SNX6-202	sorting nexin-6 [Sus scrofa]	NP_001231145.1
Chr07_89654045_89678109	Pig.08443	34.4669	5.10714	0.0179602	0.0872801	yes	up	0	0	0	0.0258361	0.0505317	0.0523047	0	0.0428908	RALGAPA1-201	ral GTPase-activating protein subunit alpha-1 isoform X7 [Sus scrofa]	XP_020954818.1
Chr07_89693469_89694186	Pig.08443	60.1753	5.9111	1.06841e-05	0.000307914	yes	up	0	0	0	0.0710492	0.0721881	0.0821931	0	0.0751435	RALGAPA1-201	ral GTPase-activating protein subunit alpha-1 isoform X7 [Sus scrofa]	XP_020954818.1
Chr07_93364322_93374732	Pig.08467	0.0448813	-4.47774	0.0058207	0.0412517	yes	down	0.0377484	0.0230042	0.0247787	0	0	0	0.0285104	0	ADPGK-201	ADP-dependent glucokinase isoform X1 [Sus scrofa]	XP_020954758.1
Chr07_95086666_95104859	MSTRG.20849	0.245229	-2.0278	0.00112308	0.0119652	yes	down	0.100662	0.0690125	0.111504	0.0193771	0.0144376	0.0373605	0.0937263	0.0237251	0	0	XP_001927907.1
Chr07_95837296_95842021	Pig.17585	3.02127	1.59515	0.0232834	0.104948	yes	up	0	0.0230042	0.0495574	0.0645902	0.0794069	0.0821931	0.0241872	0.0753967	PTPN9-201	tyrosine-protein phosphatase non-receptor type 9 isoform X1 [Sus scrofa]	XP_003128529.1
Chr07_97375124_97377963	Pig.08771	0.305756	-1.70955	0.0116057	0.0657294	yes	down	0.0629139	0.0843486	0.117699	0.0452131	0.036094	0	0.0883204	0.0271024	ETFA-201	electron transfer flavoprotein subunit alpha, mitochondrial [Sus scrofa]	NP_001231332.1
Chr07_97375124_97392874	Pig.08771	0.0878366	-3.50903	0.000363109	0.00487397	yes	down	0.0943709	0.107353	0.111504	0.012918	0	0.0149442	0.104409	0.00928741	ETFA-201	electron transfer flavoprotein subunit alpha, mitochondrial [Sus scrofa]	NP_001231332.1
Chr07_97382711_97392874	Pig.08771	0.219553	-2.18736	0.0289366	0.121781	yes	down	0.0566225	0.0306722	0.0681414	0.012918	0.0216564	0	0.051812	0.0115248	ETFA-201	electron transfer flavoprotein subunit alpha, mitochondrial [Sus scrofa]	NP_001231332.1
Chr07_97598783_97651052		66.9895	6.06586	1.14527e-05	0.00032015	yes	up	0	0	0	0.0516721	0.0721881	0.127026	0	0.0836286	#N/A	#N/A	#N/A
Chr07_97649092_97651052		29.5051	4.88289	0.00120546	0.0125789	yes	up	0	0	0	0.0581312	0	0.0523047	0	0.036812	#N/A	#N/A	#N/A
Chr07_97789171_97799770	Pig.08775	92.6744	6.5341	6.20475e-06	0.000207757	yes	up	0	0	0	0.0839672	0.18047	0.0821931	0	0.115544	FBXO22-202	ubiquitin-conjugating enzyme E2 Q2 isoform X1 [Sus scrofa]	XP_020954668.1
Chr08_115373299_115376634	Pig.00663	0.150731	-2.72995	0.00273779	0.0241099	yes	down	0.0754967	0.138025	0.09292	0.0452131	0	0	0.102147	0.015071	ETNPPL-201	ethanolamine-phosphate phospho-lyase isoform X1 [Sus scrofa]	XP_020957345.1
Chr08_115962710_115970535	Pig.00658	0.0636962	-3.97265	0.0174589	0.0857952	yes	down	0.0251656	0.0230042	0.0123893	0	0	0	0.0201864	0	HADH-202	hydroxyacyl-coenzyme A dehydrogenase, mitochondrial precursor [Sus scrofa]	NP_999496.1
Chr08_117809709_117824540	Pig.00649	0.0885449	-3.49745	0.00990107	0.0585798	yes	down	0.0943709	0.0766805	0.0681414	0	0.0216564	0	0.0797309	0.00721881	NPNT-201	nephronectin isoform X1 [Sus scrofa]	XP_020957362.1
Chr08_118273370_118291983	Pig.00645	0.21946	-2.18797	0.000158529	0.00272903	yes	down	0.559934	0.268382	0.291149	0.12918	0.0721881	0.0448326	0.373155	0.082067	PPA2-206	inorganic pyrophosphatase 2, mitochondrial isoform X1 [Sus scrofa]	XP_020957372.1
Chr08_127168216_127192837	Pig.00602	20.5309	4.35972	0.0181771	1	yes	up	0	0	0	0.0258361	0.036094	0.0149442	0	0.0256248	PDLIM5-202	PDZ and LIM domain protein 5 isoform X1 [Sus scrofa]	XP_020957405.1
Chr08_127222256_127235749	Pig.00602,MSTRG.23393	0.131071	-2.93158	0.0246361	0.108832	yes	down	0.0503312	0.0153361	0.037168	0.012918	0	0	0.0342784	0.00430601	#N/A	#N/A	#N/A
Chr08_133546769_133555553	Pig.00571	0.0288047	-5.11755	0.00240173	0.0219762	yes	down	0.031457	0.0383403	0.0619467	0	0	0	0.0439146	0	TRPM2-201	ADP-ribose pyrophosphatase, mitochondrial isoform X1 [Sus scrofa]	XP_003357134.1
Chr08_133608977_133616275	Pig.00570	0.0452428	-4.46617	0.00390763	0.0308414	yes	down	0.031457	0.0153361	0.037168	0	0	0	0.027987	0	HSD17B11-201	estradiol 17-beta-dehydrogenase 11 [Sus scrofa]	XP_020957431.1
Chr08_133905958_133907671	Pig.00567	0.0507087	-4.30162	0.00894429	0.0550571	yes	down	0.0188742	0.0383403	0.018584	0	0	0	0.0252661	0	AFF1-202	AF4/FMR2 family member 1 isoform X5 [Sus scrofa]	XP_020957439.1
Chr08_134205463_134227525		22.6017	4.49836	0.0247929	1	yes	up	0	0	0	0.0258361	0.0288752	0.0298884	0	0.0281999	#N/A	#N/A	#N/A
Chr08_137584466_137584978	Pig.00542	0.0361125	-4.79136	0.00414812	0.0324085	yes	down	0.031457	0.0306722	0.0433627	0	0	0	0.035164	0	SEC31A-202	protein transport protein Sec31A isoform X12 [Sus scrofa]	XP_020957486.1
Chr08_137907029_137913935	Pig.00539	0.157394	-2.66754	0.00926488	0.0565733	yes	down	0.0566225	0.107353	0.018584	0	0	0.0298884	0.0608531	0.0099628	ENOPH1-202	enolase-phosphatase E1 [Sus scrofa]	NP_001230759.1
Chr08_138698753_138701503	Pig.00533	0.035921	-4.79903	0.00338958	0.0284519	yes	down	0.0440398	0.0383403	0.0247787	0	0	0	0.0357196	0	RASGEF1B-201	ras-GEF domain-containing family member 1B isoform X2 [Sus scrofa]	XP_020955964.1
Chr08_139877592_139879881	Pig.00525	0.397788	-1.32993	0.0170776	0.0850553	yes	down	0.125828	0.107353	0.0867254	0.012918	0.0433129	0.074721	0.106635	0.0436506	ANTXR2-205	anthrax toxin receptor 2 [Sus scrofa]	XP_003129419.3
Chr08_139877592_139902897	Pig.00525	0.133197	-2.90836	1.45597e-05	0.000396101	yes	down	0.188742	0.253046	0.09292	0	0.0288752	0.0448326	0.178236	0.0245693	ANTXR2-205	anthrax toxin receptor 2 [Sus scrofa]	XP_003129419.3
Chr08_15198920_15200822	MSTRG.22096,Pig.04165	0.0249283	-5.32607	0.000501537	0.00621213	yes	down	0.0440398	0.0920166	0.018584	0	0	0	0.0515468	0	#N/A	#N/A	#N/A
Chr08_15357160_15363180	Pig.04163	5.68293	2.50663	0.00228413	0.0212187	yes	up	0.0188742	0.0230042	0	0.0775082	0.0577505	0.0971373	0.0139594	0.0774653	GUCY1B1-201	PREDICTED: guanylate cyclase soluble subunit beta-1 [Bubalus bubalis]	XP_004421004.1
Chr08_1819603_1844417		0.042073	-4.57096	0.0124489	0.068717	yes	down	0.0251656	0.0153361	0.0495574	0	0	0	0.0300197	0	#N/A	#N/A	#N/A
Chr08_20859963_20878523	Pig.16697	0.124801	-3.0023	0.0104199	0.0605903	yes	down	0.0440398	0.0230042	0.0433627	0	0	0.0149442	0.0368022	0.0049814	DCUN1D4-201	PREDICTED: DCN1-like protein 4 isoform X3 [Ceratotherium simum simum]	XP_004419114.1
Chr08_27230303_27261524	Pig.12465	11.1933	3.48456	0.0308662	0.127341	yes	up	0	0	0	0.012918	0.0288752	0	0	0.0139311	LIMCH1-207	LOW QUALITY PROTEIN: LIM and calponin homology domains-containing protein 1 [Sus scrofa]	XP_020956816.1
Chr08_27877060_27877875	Pig.12463	0.0620224	-4.01107	0.045925	1	yes	down	0.0188742	0.0306722	0.0123893	0	0	0	0.0206452	0	APBB2-201	amyloid beta A4 precursor protein-binding family B member 2 isoform X9 [Sus scrofa]	XP_020956809.1
Chr08_29333065_29340884	Pig.07253	0.138099	-2.85622	0.0142637	0.0754541	yes	down	0.100662	0.153361	0.0309733	0.0387541	0	0	0.0949989	0.012918	RFC1-201	replication factor C subunit 1 isoform X2 [Sus scrofa]	XP_005666645.1
Chr08_41107578_41125290	Pig.19832	0.325571	-1.61895	0.000356366	0.00482599	yes	down	0.188742	0.253046	0.173451	0.0775082	0.0794069	0.0448326	0.205079	0.0672492	CCDC149-201	coiled-coil domain-containing protein 149 isoform X3 [Sus scrofa]	XP_020956219.1
Chr08_49633206_49660217	Pig.05336	0.366942	-1.44638	0.0163331	0.0830171	yes	down	0.106954	0.115021	0.0805307	0.0387541	0.0433129	0.0298884	0.100835	0.0373185	CPEB2-201	cytoplasmic polyadenylation element-binding protein 2 isoform X1 [Sus scrofa]	XP_020955979.1
Chr08_71012313_71017161	MSTRG.22686,Pig.08321	0.00417492	-7.90403	2.73664e-10	2.79621e-08	yes	down	0.22649	0.306722	0.377875	0	0	0	0.303696	0	#N/A	#N/A	#N/A
Chr08_71012313_71018900	MSTRG.22686,Pig.08321	0.0113999	-6.45483	2.90311e-06	0.000111972	yes	down	0.0943709	0.122689	0.117699	0	0	0	0.111586	0	#N/A	#N/A	#N/A
Chr08_71012313_71020074	MSTRG.22686,Pig.08321	0.00419927	-7.89564	4.80136e-10	4.43325e-08	yes	down	0.232782	0.391071	0.284955	0	0	0	0.302936	0	#N/A	#N/A	#N/A
Chr08_71014242_71017161	MSTRG.22686,Pig.08321	0.0359026	-4.79977	0.0467572	1	yes	down	0.0440398	0.0383403	0.0247787	0	0	0	0.0357196	0	#N/A	#N/A	#N/A
Chr08_71021523_71023766	MSTRG.22686	0.00445837	-7.80927	5.72394e-10	5.12966e-08	yes	down	0.289404	0.283718	0.284955	0	0	0	0.286026	0	0	0	NP_001005208.1
Chr08_71078825_71082407	Pig.08323	0.0371045	-4.75226	0.0110723	1	yes	down	0.0125828	0.0460083	0.0433627	0	0	0	0.0339846	0	AFM-203	afamin isoform X1 [Sus scrofa]	XP_003357020.1
Chr08_71078825_71090128		0.0171816	-5.86299	9.68995e-05	0.00182255	yes	down	0.0754967	0.0920166	0.055752	0	0	0	0.0744218	0	#N/A	#N/A	#N/A
Chr08_71080336_71084796	Pig.08323	0.00398942	-7.96961	9.28712e-11	1.13191e-08	yes	down	0.352318	0.291386	0.315928	0	0	0	0.319877	0	AFM-203	afamin isoform X1 [Sus scrofa]	XP_003357020.1
Chr08_71418686_71512101		7.13958	2.83584	0.00085633	0.00980917	yes	up	0	0.0460083	0.0247787	0.142098	0.101063	0.261523	0.0235957	0.168228	#N/A	#N/A	#N/A
Chr08_71559017_71589737	Pig.08332	0.0451303	-4.46976	0.00355742	0.0291629	yes	down	0.0503312	0.0230042	0.0123893	0	0	0	0.0285749	0	MTHFD2-201	PREDICTED: probable bifunctional methylenetetrahydrofolate dehydrogenase/cyclohydrolase 2 [Bos mutus]	XP_005891322.1
Chr08_71559017_71632364	Pig.08332	0.21383	-2.22546	0.0484533	0.173283	yes	down	0.031457	0.0460083	0.018584	0.0193771	0	0	0.0320164	0.00645902	MTHFD2-201	PREDICTED: probable bifunctional methylenetetrahydrofolate dehydrogenase/cyclohydrolase 2 [Bos mutus]	XP_005891322.1
Chr08_84424521_84438446	Pig.01076	0.15016	-2.73543	0.0312199	0.128376	yes	down	0.0188742	0.0230042	0.0495574	0	0.0144376	0	0.0304786	0.00481254	SMAD1-201	mothers against decapentaplegic homolog 1 [Sus scrofa]	NP_999130.1
Chr08_87802538_87815783	Pig.01059	28.0203	4.8084	0.00186795	0.0179547	yes	up	0	0	0	0.0452131	0	0.0597768	0	0.0349966	RNF150-202	LOW QUALITY PROTEIN: RING finger protein 150 [Sus scrofa]	XP_020957213.1
Chr08_89060362_89088138	Pig.01050	20.5982	4.36445	0.0091591	0.0561525	yes	up	0	0	0	0.0258361	0.0288752	0.0224163	0	0.0257092	SETD7-201	histone-lysine N-methyltransferase SETD7 isoform X2 [Sus scrofa]	XP_020957219.1
Chr08_89371700_89392735		0.33171	-1.59201	0.0480417	0.172978	yes	down	0.0440398	0.0536764	0.0309733	0	0	0.0448326	0.0428965	0.0149442	#N/A	#N/A	#N/A
Chr08_98373397_98395063	Pig.01030	0.0723404	-3.78905	0.0192376	0.0918764	yes	down	0.0188742	0.0153361	0.018584	0	0	0	0.0175981	0	LARP1B-201	la-related protein 1B isoform X1 [Sus scrofa]	XP_013834346.2
Chr09_10030986_10046260		0.0011809	-9.7259	2.8554e-13	6.69262e-11	yes	down	1.17649	0.858822	1.20796	0	0	0	1.08109	0	#N/A	#N/A	#N/A
Chr09_105808546_105819962	Pig.08232	0.0252945	-5.30503	0.000251475	0.00370166	yes	down	0.0503312	0.0383403	0.0619467	0	0	0	0.050206	0	BCO2-203	beta,beta-carotene 9',10'-oxygenase isoform X1 [Sus scrofa]	XP_003129903.2
Chr09_109165747_109193076	Pig.11684	2.47684	1.3085	0.00391717	0.0308414	yes	up	0.132119	0.0383403	0.0681414	0.155016	0.166033	0.28394	0.0795336	0.201663	PICALM-207	phosphatidylinositol-binding clathrin assembly protein isoform X6 [Sus scrofa]	XP_020957732.1
Chr09_110087896_110112039	Pig.11675	3.85601	1.94711	0.0163961	0.0831265	yes	up	0.0754967	0.0306722	0	0.174393	0.144376	0.0896652	0.0353896	0.136145	TMEM135-201	transmembrane protein 135 isoform X1 [Sus scrofa]	XP_020918270.1
Chr09_110087896_110158133	Pig.11675	37.594	5.23243	0.000273855	0.00399252	yes	up	0	0	0	0.0452131	0.0433129	0.0523047	0	0.0469436	TMEM135-201	transmembrane protein 135 isoform X1 [Sus scrofa]	XP_020918270.1
Chr09_116505101_116511736	MSTRG.25472,Pig.08139	65.1079	6.02476	1.08191e-05	0.000307914	yes	up	0	0	0	0.0968853	0.0721881	0.074721	0	0.0812648	#N/A	#N/A	#N/A
Chr09_116510800_116511736	MSTRG.25472,Pig.08139	12.6794	3.66442	0.0186781	0.089767	yes	up	0	0	0	0.0322951	0.0144376	0	0	0.0155776	#N/A	#N/A	#N/A
Chr09_116529537_116538460	MSTRG.25472	3.91526	1.96911	0.0152217	0.0791475	yes	up	0	0.0306722	0.0309733	0.0968853	0.0794069	0.0672489	0.0205485	0.0811804	0	0	XP_005667294.2
Chr09_117715212_117716726	Pig.08150	6.11196	2.61164	1.33149e-06	6.28141e-05	yes	up	0.0377484	0.0383403	0.018584	0.232525	0.151595	0.194275	0.0315575	0.192798	MAML2-201	mastermind-like protein 2 isoform X2 [Sus scrofa]	XP_020957993.1
Chr09_123940633_123970308	Pig.12906	0.0563066	-4.15055	0.0338087	0.136625	yes	down	0.0503312	0	0.018584	0	0	0	0.0229717	0	NUP98-202	LOW QUALITY PROTEIN: nuclear pore complex protein Nup98-Nup96 [Sus scrofa]	XP_020918086.1
Chr09_124151096_124157955	Pig.12901	0.117009	-3.09531	0.0426004	0.159856	yes	down	0.132119	0.0153361	0.0247787	0.0193771	0	0	0.0574114	0.00645902	RNF121-201	RING finger protein 121 isoform X1 [Sus scrofa]	XP_003129664.1
Chr09_125742234_125756680	Pig.12876	0.166188	-2.58911	0.0274741	0.117282	yes	down	0.0251656	0.0460083	0.0495574	0.0193771	0	0	0.0402437	0.00645902	RAB6A-201	PREDICTED: ras-related protein Rab-6A isoform X1 [Oryctolagus cuniculus]	XP_002708751.1
Chr09_132363589_132363802	MSTRG.25786,Pig.20569	22.8896	4.51662	0.0291598	0.122383	yes	up	0	0	0	0.0258361	0	0.0597768	0	0.0285376	#N/A	#N/A	#N/A
Chr09_132961125_133032137	Pig.10255	25.6189	4.67914	0.00232056	0.0214265	yes	up	0	0	0	0.0516721	0.0216564	0.0224163	0	0.031915	UVRAG-201	UV radiation resistance-associated gene protein isoform X2 [Sus scrofa]	XP_020918186.1
Chr09_133753630_133848763	Pig.10246	43.5079	5.44321	0.00260169	0.0233157	yes	up	0	0	0	0.0452131	0.0577505	0.0597768	0	0.0542468	ACER3-201	alkaline ceramidase 3 isoform X1 [Sus scrofa]	XP_020918213.1
Chr09_134961058_134964794	Pig.10235	77.6688	6.27926	0.000385387	0.00511788	yes	up	0	0	0	0.0839672	0.0794069	0.127026	0	0.0967999	RSF1-201	remodeling and spacing factor 1 [Sus scrofa]	ACJ53937.1
Chr09_140258015_140346066	MSTRG.25913,Pig.18880	31.4492	4.97495	0.010389	1	yes	up	0	0	0	0.0452131	0.0577505	0.0149442	0	0.0393026	#N/A	#N/A	#N/A
Chr09_16522266_16542844	Pig.04694	34.2002	5.09593	0.00241747	0.0219882	yes	up	0	0	0	0.0258361	0.0721881	0.0298884	0	0.0426375	CEP350	LOW QUALITY PROTEIN: centrosome-associated protein 350 [Sus scrofa]	XP_020919409.1
Chr09_16536395_16537017	Pig.04694	3.39073	1.76159	0.0439732	0.162954	yes	up	0.0125828	0	0.018584	0.0322951	0.0288752	0.0523047	0.0103889	0.037825	CEP350	LOW QUALITY PROTEIN: centrosome-associated protein 350 [Sus scrofa]	XP_020919409.1
Chr09_18435140_18439998	Pig.04675	0.0574927	-4.12048	0.0432174	1	yes	down	0.0251656	0.0230042	0.018584	0	0	0	0.0222512	0	SEC16B-202	protein transport protein Sec16B isoform X1 [Sus scrofa]	XP_020919350.1
Chr09_22002661_22003677	Pig.04659	3.88088	1.95638	0.012215	0.0677784	yes	up	0	0	0.037168	0.0322951	0.0649693	0.0597768	0.0123893	0.0523471	RC3H1-201	roquin-1 isoform X1 [Sus scrofa]	XP_003357594.3
Chr09_2529470_2539616	Pig.14419	0.0324364	-4.94624	0.0031293	0.026935	yes	down	0.0188742	0.0613444	0.037168	0	0	0	0.0391289	0	COBL	LOW QUALITY PROTEIN: protein cordon-bleu [Sus scrofa]	XP_020919590.1
Chr09_33373916_33420108	Pig.00297	0.133693	-2.903	0.000746863	0.00878646	yes	down	0.0629139	0.138025	0.105309	0.0193771	0.0216564	0	0.102083	0.0136778	SRPK2-201	SRSF protein kinase 2 isoform X2 [Sus scrofa]	XP_020958237.1
Chr09_33496203_33504556	Pig.00298	3.77669	1.91712	0.043346	0.161461	yes	up	0	0.0153361	0.0309733	0.0322951	0.036094	0.112081	0.0154365	0.0601569	KMT2E-201	histone-lysine N-methyltransferase 2E isoform X1 [Sus scrofa]	XP_013835277.2
Chr09_38770634_38831263		0.000600139	-10.7024	0.000156944	0.0027171	yes	down	2.74305	1.57195	2.09999	0	0	0	2.13833	0	#N/A	#N/A	#N/A
Chr09_40198606_40202893	Pig.00327	0.0567001	-4.1405	0.00805293	0.051013	yes	down	0.0251656	0.0306722	0.0123893	0	0	0	0.0227424	0	CACNA2D1-201	voltage-dependent calcium channel subunit alpha-2/delta-1 isoform X5 [Sus scrofa]	XP_013835239.1
Chr09_45493560_45496209	Pig.00341	0.0107206	-6.54347	1.12273e-06	5.70161e-05	yes	down	0.100662	0.138025	0.117699	0	0	0	0.118795	0	ABCB1	LOW QUALITY PROTEIN: multidrug resistance protein 1-like [Sus scrofa]	XP_020919622.1
Chr09_47585747_47596458	Pig.00356	0.025269	-5.30648	0.000845229	0.00971854	yes	down	0.0440398	0.0383403	0.0681414	0	0	0	0.0501738	0	RAPGEF5-202	rap guanine nucleotide exchange factor 5 isoform X1 [Sus scrofa]	XP_013845029.1
Chr09_49973631_49975568		6.62738	2.72844	0.0129882	0.0711615	yes	up	0.0125828	0.0153361	0	0.0193771	0.0721881	0.0896652	0.0093063	0.0604101	#N/A	#N/A	#N/A
Chr09_53971179_54037551	Pig.00384	0.0381016	-4.714	0.00524133	1	yes	down	0.0377484	0.0383403	0.0247787	0	0	0	0.0336224	0	AGMO-201	alkylglycerol monooxygenase isoform X1 [Sus scrofa]	XP_003130227.3
Chr09_54009268_54037551	Pig.00384	0.040797	-4.61539	0.0136949	0.0740045	yes	down	0.0188742	0.0306722	0.0433627	0	0	0	0.0309697	0	AGMO-201	alkylglycerol monooxygenase isoform X1 [Sus scrofa]	XP_003130227.3
Chr09_66558827_66566856	MSTRG.24574,Pig.00439	0.0683491	-3.87093	0.0433714	1	yes	down	0.0377484	0	0.018584	0	0	0	0.0187775	0	#N/A	#N/A	#N/A
Chr09_73629528_73630300	Pig.00508	11.3803	3.50846	0.01392	0.0745348	yes	up	0	0	0	0	0.0433129	0	0	0.0144376	PIK3C2B-201	phosphatidylinositol 4-phosphate 3-kinase C2 domain-containing subunit beta isoform X1 [Sus scrofa]	XP_003357437.4
Chr09_8107518_8113176	Pig.14368	0.109637	-3.1892	0.000947831	0.0105759	yes	down	0.0943709	0.0690125	0.0867254	0.012918	0.0144376	0	0.0833696	0.00911855	LPGAT1-201	acyl-CoA:lysophosphatidylglycerol acyltransferase 1 [Sus scrofa]	XP_003357646.2
Chr09_8107518_8117610	Pig.14368	0.157842	-2.66344	9.53333e-12	1.61378e-09	yes	down	0.792716	0.720797	0.774334	0.116262	0.0866257	0.164386	0.762615	0.122425	LPGAT1-201	acyl-CoA:lysophosphatidylglycerol acyltransferase 1 [Sus scrofa]	XP_003357646.2
Chr09_82052507_82057293	Pig.12164	0.0664282	-3.91206	0.0122344	0.0677784	yes	down	0.0188742	0	0.037168	0	0	0	0.0186807	0	PRDM10-201	PR domain zinc finger protein 10 isoform X2 [Sus scrofa]	XP_013835022.2
Chr09_9021989_9036996	Pig.14356	0.047683	-4.39038	0.00939284	0.0569882	yes	down	0.031457	0.0306722	0.018584	0	0	0	0.0269044	0	FLVCR1-202	feline leukemia virus subgroup C receptor-related protein 1 [Sus scrofa]	NP_001136318.1
Chr09_90951665_90967965		0.143583	-2.80004	9.37741e-06	0.000282051	yes	down	0.515894	0.168697	0.303539	0.0904263	0.0505317	0	0.329377	0.046986	#N/A	#N/A	#N/A
Chr09_92664524_92666467	MSTRG.25007,Pig.06854	3.13929	1.65044	7.21562e-06	0.000231431	yes	up	0.0754967	0.115021	0.117699	0.238984	0.332065	0.410965	0.102739	0.327338	#N/A	#N/A	#N/A
Chr09_92665869_92666467	MSTRG.25007,Pig.06854	21.2694	4.41071	0.0398659	1	yes	up	0	0	0	0.012918	0.0216564	0.0448326	0	0.026469	#N/A	#N/A	#N/A
Chr09_97772074_97773419	MSTRG.25157	39.6552	5.30944	0.0117067	0.0660019	yes	up	0	0	0	0.0387541	0.0721881	0.0373605	0	0.0494342	0	0	XP_020918527.1
Chr10_12010782_12017302	Pig.12142	0.217526	-2.20074	0.045813	0.167779	yes	down	0.0692053	0.0230042	0.0309733	0.0258361	0	0	0.0410609	0.00861202	NR5A2-201	nuclear receptor subfamily 5 group A member 2 isoform X1 [Sus scrofa]	XP_020919660.1
Chr10_16177546_16182624	Pig.10842,MSTRG.26263	0.067656	-3.88564	0.0464363	1	yes	down	0.0251656	0	0.0309733	0	0	0	0.018713	0	#N/A	#N/A	#N/A
Chr10_16252337_16255697		0.094085	-3.40989	0.0422066	0.158966	yes	down	0	0.0153361	0.0247787	0	0	0	0.0133716	0	#N/A	#N/A	#N/A
Chr10_17210237_17246070	Pig.10851,MSTRG.26305	3.34725	1.74298	0.00115841	0.0122672	yes	up	0.0251656	0.0843486	0.037168	0.142098	0.166033	0.17933	0.048894	0.162487	#N/A	#N/A	#N/A
Chr10_1913538_1919786	Pig.17959	0.00506253	-7.62593	0.0192711	0.0918919	yes	down	0.905961	0.659452	0.947784	0.012918	0	0	0.837732	0.00430601	SCCPDH-201	uncharacterized protein LOC100521600 isoform X2 [Sus scrofa]	XP_020937812.1
Chr10_20827319_20840251	Pig.11166	0.0250641	-5.31823	0.00136395	0.0138995	yes	down	0.0440398	0.0460083	0.0619467	0	0	0	0.0506649	0	MARC1	mitochondrial amidoxime-reducing component 1 isoform X1 [Sus scrofa]	XP_020919996.1
Chr10_20961970_20996575	Pig.11163	22.3213	4.48035	0.0232527	0.104948	yes	up	0	0	0	0.0258361	0.0577505	0	0	0.0278622	MARK1-201	serine/threonine-protein kinase MARK1 isoform X1 [Sus scrofa]	XP_020919987.1
Chr10_20969083_20996575	Pig.11163	54.0229	5.7555	3.29627e-05	0.000772596	yes	up	0	0	0	0.0775082	0.0649693	0.0597768	0	0.0674181	MARK1-201	serine/threonine-protein kinase MARK1 isoform X1 [Sus scrofa]	XP_020919987.1
Chr10_22670141_22673756	Pig.11154	42.6143	5.41326	5.84171e-05	0.00118665	yes	up	0	0	0	0.0710492	0.0433129	0.0448326	0	0.0530649	TGFB2-201	transforming growth factor beta-2 isoform X1 [Sus scrofa]	XP_020919953.1
Chr10_33762189_33772386	Pig.17816	0.0268326	-5.21987	0.000170699	0.00288574	yes	down	0.0251656	0.0613444	0.055752	0	0	0	0.0474207	0	CFH	complement factor H precursor [Sus scrofa]	NP_999446.1
Chr10_33762189_33787163	Pig.17816	0.0400977	-4.64034	0.0151556	1	yes	down	0.0125828	0.0383403	0.0433627	0	0	0	0.0314286	0	CFH	complement factor H precursor [Sus scrofa]	NP_999446.1
Chr10_33794237_33815106	MSTRG.26482,Pig.17816	0.107341	-3.21973	0.0283885	0.120033	yes	down	0.031457	0.0766805	0.0867254	0	0.0216564	0	0.0649543	0.00721881	#N/A	#N/A	#N/A
Chr10_34281541_34315347		0.312279	-1.67909	2.2792e-11	3.30701e-09	yes	down	1.06954	0.881826	1.05309	0.26482	0.36094	0.328772	1.00149	0.318178	#N/A	#N/A	#N/A
Chr10_34546601_34557712	Pig.14079	3.44383	1.78401	0.0166634	0.0837843	yes	up	0	0.0460083	0.0123893	0.103344	0.0433129	0.0448326	0.0194659	0.0638299	DIP2C-201	disco-interacting protein 2 homolog C isoform X1 [Sus scrofa]	XP_020920733.1
Chr10_37919194_37950701		2.48702e-09	-28.5829	6.65082e-05	0.00130742	yes	down	0	0	0.681414	0	0	0	0.227138	0	#N/A	#N/A	#N/A
Chr10_39752709_39765278		0.00426485	-7.87329	1.98324e-10	2.15819e-08	yes	down	0.339735	0.345062	0.216813	0	0	0	0.300537	0	#N/A	#N/A	#N/A
Chr10_4279152_4304880	Pig.12495	0.0751396	-3.73428	0.0264994	0.114368	yes	down	0.0188742	0	0.0309733	0	0	0	0.0166158	0	SCCPDH-201	saccharopine dehydrogenase-like oxidoreductase [Sus scrofa]	NP_001231318.1
Chr10_43934865_43941092	MSTRG.26640,Pig.20497	0.496794	-1.00928	0.0163473	0.0830171	yes	down	0.490729	0.176365	0.27876	0.193771	0.108282	0.171858	0.315285	0.15797	#N/A	#N/A	#N/A
Chr10_44021920_44023990	Pig.20499	0.0324544	-4.94544	0.00249799	0.0225188	yes	down	0.0251656	0.0230042	0.0681414	0	0	0	0.0387704	0	DHTKD1-201	probable 2-oxoglutarate dehydrogenase E1 component DHKTD1, mitochondrial isoform X1 [Sus scrofa]	XP_020920651.1
Chr10_46687555_46689935	Pig.09685	0.294849	-1.76195	0.00359118	0.0291795	yes	down	0.176159	0.130357	0.09292	0.0452131	0.0433129	0.0298884	0.133145	0.0394715	PARD3-201	LOW QUALITY PROTEIN: partitioning defective 3 homolog [Sus scrofa]	XP_020919890.1
Chr10_46687555_46712915	Pig.09685	0.0823972	-3.60126	0.00921195	0.0563631	yes	down	0.031457	0.0690125	0.0619467	0.012918	0	0	0.0541387	0.00430601	PARD3-201	LOW QUALITY PROTEIN: partitioning defective 3 homolog [Sus scrofa]	XP_020919890.1
Chr10_46727592_46772767	Pig.09685	0.0759687	-3.71845	0.042843	0.160373	yes	down	0.0251656	0	0.0247787	0	0	0	0.0166481	0	PARD3-201	LOW QUALITY PROTEIN: partitioning defective 3 homolog [Sus scrofa]	XP_020919890.1
Chr10_46803012_46813745	Pig.09685	0.254511	-1.9742	0.000437486	0.00560093	yes	down	0.150993	0.161029	0.123893	0.0387541	0.036094	0.0373605	0.145305	0.0374029	PARD3-201	LOW QUALITY PROTEIN: partitioning defective 3 homolog [Sus scrofa]	XP_020919890.1
Chr10_50121653_50166888		0.0724239	-3.78739	0.0487086	1	yes	down	0.0188742	0.0153361	0.018584	0	0	0	0.0175981	0	#N/A	#N/A	#N/A
Chr10_50761217_50794597	Pig.09670	0.406769	-1.29772	0.00700655	0.0466135	yes	down	0.113245	0.161029	0.204424	0.0322951	0.115501	0.0523047	0.159566	0.0667002	MLLT10-201	protein AF-10 isoform X3 [Sus scrofa]	XP_020920583.1
Chr10_55203503_55208964	Pig.16891	0.400441	-1.32034	0.0444055	0.164004	yes	down	0.125828	0.0460083	0.142477	0.0258361	0.0216564	0.0821931	0.104771	0.0432285	ACBD5-201	acyl-CoA-binding domain-containing protein 5 isoform X4 [Sus scrofa]	XP_020920544.1
Chr10_55596160_55619745	MSTRG.26799,Pig.13776	5.20139	2.3789	0.00967782	0.0579862	yes	up	0.031457	0	0.0247787	0.142098	0.0721881	0.0896652	0.0187452	0.101317	#N/A	#N/A	#N/A
Chr10_56001317_56001808		23.8469	4.57573	0.00582154	0.0412517	yes	up	0	0	0	0.0452131	0.0216564	0.0224163	0	0.029762	#N/A	#N/A	#N/A
Chr10_58174995_58205038	Pig.13795	2.0648	1.046	0.0291332	0.122383	yes	up	0.0629139	0.0613444	0.0309733	0.12918	0.0866257	0.104609	0.0517439	0.106805	MINDY3-201	ubiquitin carboxyl-terminal hydrolase MINDY-3 isoform X1 [Sus scrofa]	XP_003130783.1
Chr10_59057202_59060429	Pig.13798	0.0795057	-3.6528	0.0220081	0.101145	yes	down	0.0188742	0.0306722	0	0	0	0	0.0165155	0	RSU1-201	ras suppressor protein 1 isoform X1 [Sus scrofa]	XP_020920486.1
Chr10_61841725_61864145	Pig.05022	2.80432	1.48765	0.000362247	0.00487397	yes	up	0.106954	0.107353	0.074336	0.258361	0.281534	0.276468	0.0962141	0.272121	ARHGAP12-201	rho GTPase-activating protein 12 isoform X5 [Sus scrofa]	XP_013835673.1
Chr10_61852304_61864145	Pig.05022	18.6663	4.22236	0.0220964	0.101245	yes	up	0	0	0	0.0258361	0.0216564	0.0224163	0	0.0233029	ARHGAP12-201	rho GTPase-activating protein 12 isoform X5 [Sus scrofa]	XP_013835673.1
Chr10_62251864_62267849	Pig.05023	0.0728446	-3.77903	0.0478173	0.172425	yes	down	0.0251656	0.0153361	0.0123893	0	0	0	0.0176303	0	ZEB1-201	LOW QUALITY PROTEIN: zinc finger E-box-binding homeobox 1 [Sus scrofa]	XP_020919855.1
Chr10_71425687_71427450	MSTRG.27019	22.7005	4.50465	0.00465173	0.0352583	yes	up	0	0	0	0.0258361	0.0144376	0.0448326	0	0.0283688	0	0	NP_001106909.1
Chr10_71673526_71700050	MSTRG.27025	3.87227	1.95318	8.19064e-06	0.000255949	yes	up	0.100662	0.0306722	0.0867254	0.297115	0.267096	0.306356	0.0726866	0.290189	0	0	XP_020920352.1
Chr10_71675815_71683181	MSTRG.27025,Pig.05070	32.4499	5.02014	0.00192489	0.018386	yes	up	0	0	0	0.0258361	0.0433129	0.0523047	0	0.0404845	#N/A	#N/A	#N/A
Chr10_75878857_75880339	MSTRG.27145,Pig.09943	0.0568729	-4.13612	0.0225894	0.102428	yes	down	0.0692053	0	0	0	0	0	0.0230684	0	#N/A	#N/A	#N/A
Chr10_75879157_75880339	MSTRG.27145,Pig.09943	0.192027	-2.38062	6.20922e-11	7.88313e-09	yes	down	0.987749	0.651784	0.854864	0.155016	0.166033	0.164386	0.831466	0.161812	#N/A	#N/A	#N/A
Chr10_79750648_79751650	Pig.09964,MSTRG.27211	0.0552041	-4.17908	0.000181908	0.00297997	yes	down	0.0692053	0.130357	0.055752	0	0	0.0149442	0.0851047	0.0049814	#N/A	#N/A	#N/A
Chr11_1141966_1143058	Pig.20214	20.5131	4.35847	0.00671688	0.0454834	yes	up	0.0125828	0	0	0.135639	0.0938445	0.0373605	0.00419426	0.0889481	Col4a1	collagen alpha-1(IV) chain [Castor canadensis]	XP_020921569.1
Chr11_12201402_12205677	Pig.03511	2.02998	1.02147	6.22675e-05	0.00124822	yes	up	0.434106	0.529095	0.507963	0.981771	0.960102	1.09093	0.490388	1.01093	PAN3-201	PAB-dependent poly(A)-specific ribonuclease subunit PAN3 isoform X1 [Sus scrofa]	XP_005668351.1
Chr11_12201402_12222536	Pig.03511	2.51714	1.33178	0.00335024	0.0282775	yes	up	0.0692053	0.0766805	0.0681414	0.193771	0.223783	0.127026	0.0713424	0.181526	PAN3-201	PAB-dependent poly(A)-specific ribonuclease subunit PAN3 isoform X1 [Sus scrofa]	XP_005668351.1
Chr11_12201402_12245406	Pig.03511	2.01587	1.01141	0.0406051	0.155863	yes	up	0.0817881	0.0460083	0.0495574	0.135639	0.108282	0.119554	0.0591179	0.121158	PAN3-201	PAB-dependent poly(A)-specific ribonuclease subunit PAN3 isoform X1 [Sus scrofa]	XP_005668351.1
Chr11_12275090_12278556	Pig.03511	3.61108	1.85243	0.047248	0.171318	yes	up	0.0251656	0.0153361	0.0123893	0.0904263	0.0505317	0.0523047	0.0176303	0.0644209	PAN3-201	PAB-dependent poly(A)-specific ribonuclease subunit PAN3 isoform X1 [Sus scrofa]	XP_005668351.1
Chr11_12275090_12291797	Pig.03511	10.8498	3.4396	0.0482973	0.172978	yes	up	0	0	0	0.0258361	0.0144376	0	0	0.0134246	PAN3-201	PAB-dependent poly(A)-specific ribonuclease subunit PAN3 isoform X1 [Sus scrofa]	XP_005668351.1
Chr11_12275090_12300096	Pig.03511	39.5747	5.30651	0.000113386	0.00206878	yes	up	0	0	0	0.0387541	0.0721881	0.0373605	0	0.0494342	PAN3-201	PAB-dependent poly(A)-specific ribonuclease subunit PAN3 isoform X1 [Sus scrofa]	XP_005668351.1
Chr11_12285086_12300096	Pig.03511	17.3616	4.11783	0.0144189	0.0758798	yes	up	0	0	0	0.0645902	0	0	0	0.0215301	PAN3-201	PAB-dependent poly(A)-specific ribonuclease subunit PAN3 isoform X1 [Sus scrofa]	XP_005668351.1
Chr11_12464386_12465127	Pig.03510	9.24098	3.20805	0.00195986	0.0186616	yes	up	0.0188742	0	0	0.109803	0.0577505	0.0149442	0.00629139	0.0608327	FLT1-201	vascular endothelial growth factor receptor 1 isoform X2 [Sus scrofa]	XP_001925775.5
Chr11_15621464_15623081	Pig.03488	11.2816	3.4959	0.0340829	0.137006	yes	up	0	0	0	0.012918	0.0144376	0.0149442	0	0.0141	N4BP2L2	LOW QUALITY PROTEIN: NEDD4-binding protein 2-like 2 [Sus scrofa]	XP_020920838.1
Chr11_1781440_1784036	Pig.18473	2.38335	1.25299	0.0494427	0.175294	yes	up	0.0251656	0.0460083	0.037168	0.0322951	0.0577505	0.171858	0.036114	0.0873013	ARHGEF7-201	rho guanine nucleotide exchange factor 7 isoform X9 [Sus scrofa]	XP_020921591.1
Chr11_25123977_25135223		0.340903	-1.55257	0.0386564	0.150366	yes	down	0.0692053	0.0920166	0.0433627	0.0258361	0.0144376	0.0298884	0.0681949	0.0233874	#N/A	#N/A	#N/A
Chr11_29573414_29594388	Pig.07336	24.4473	4.61161	0.00968656	0.0579862	yes	up	0	0	0	0.0322951	0.0144376	0.0448326	0	0.0305218	NAA16	N-alpha-acetyltransferase 16, NatA auxiliary subunit isoform X1 [Sus scrofa]	XP_020921285.1
Chr11_34579623_34579988	Pig.07349	26.907	4.74991	0.0117811	0.0661086	yes	up	0	0	0	0.0193771	0.0288752	0.0523047	0	0.033519	PCDH17-201	protocadherin-17 isoform X1 [Sus scrofa]	XP_020921306.1
Chr11_4429771_4437719	Pig.03585	0.0536243	-4.22097	0.00351615	0.0290344	yes	down	0.031457	0.122689	0.09292	0.012918	0	0	0.0823553	0.00430601	FAH-201	fumarylacetoacetase [Sus scrofa]	XP_003356696.1
Chr11_4445554_4455476	Pig.03585	0.0176432	-5.82474	3.6423e-05	0.000834442	yes	down	0.0692053	0.0536764	0.09292	0	0	0	0.0719339	0	FAH-201	fumarylacetoacetase [Sus scrofa]	XP_003356696.1
Chr11_4486703_4489369		0.141755	-2.81853	0.0368506	0.145458	yes	down	0.0251656	0.0460083	0.0247787	0.012918	0	0	0.0319842	0.00430601	#N/A	#N/A	#N/A
Chr11_56028794_56032206	Pig.04511	0.497976	-1.00585	0.0482789	0.172978	yes	down	0.100662	0.0996847	0.09292	0.0452131	0.0288752	0.074721	0.0977557	0.0496031	NDFIP2-202	NEDD4 family-interacting protein 2 [Sus scrofa]	XP_001926612.1
Chr11_56028794_56037997	Pig.04511	0.195178	-2.35714	2.15628e-06	9.08803e-05	yes	down	0.446689	0.467751	0.526547	0.0968853	0.158814	0.0298884	0.480329	0.0951958	NDFIP2-202	NEDD4 family-interacting protein 2 [Sus scrofa]	XP_001926612.1
Chr11_56028794_56044515	Pig.04511	0.0299936	-5.0592	0.000231564	0.00345896	yes	down	0.0251656	0.0460083	0.055752	0	0	0	0.0423086	0	NDFIP2-202	NEDD4 family-interacting protein 2 [Sus scrofa]	XP_001926612.1
Chr11_56028794_56048891	Pig.04511	0.142238	-2.81362	0.000483168	0.0060704	yes	down	0.0817881	0.0843486	0.130088	0	0	0.0448326	0.0987416	0.0149442	NDFIP2-202	NEDD4 family-interacting protein 2 [Sus scrofa]	XP_001926612.1
Chr11_56028794_56052028		0.0687369	-3.86277	0.00337525	0.0284099	yes	down	0.031457	0.0766805	0.09292	0	0.0144376	0	0.0670192	0.00481254	#N/A	#N/A	#N/A
Chr11_73469919_73470694		3.9827	1.99375	0.000210698	0.00325915	yes	up	0.0566225	0.0460083	0.018584	0.219607	0.166033	0.0971373	0.040405	0.160926	#N/A	#N/A	#N/A
Chr11_76729156_76730764	Pig.07943	36.6349	5.19515	0.00851766	0.0532553	yes	up	0	0	0	0.0581312	0.0794069	0	0	0.045846	NALCN	sodium leak channel non-selective protein isoform X1 [Sus scrofa]	XP_020921537.1
Chr11_81152042_81152325	Pig.07954	29.9619	4.90506	0.00933172	0.0568675	yes	up	0	0	0	0.0387541	0.036094	0.0373605	0	0.0374029	EFNB2-201	EFNB2 [Sus scrofa]	AHA44850.1
Chr11_82932722_82981452	Pig.07964	0.0182171	-5.77857	0.00236071	0.0216659	yes	down	0.0692053	0.0536764	0.0867254	0	0	0	0.069869	0	MYO16	LOW QUALITY PROTEIN: unconventional myosin-XVI [Sus scrofa]	XP_020921564.1
Chr12_11806957_11891592	MSTRG.28723	0.251111	-1.9936	0.0220009	0.101145	yes	down	0.0692053	0.0306722	0.737166	0.0710492	0.0649693	0.0821931	0.279014	0.0727372	0	0	XP_020921875.1
Chr12_15327650_15371282	Pig.18677,MSTRG.28969	2.3254	1.21748	0.034629	0.138653	yes	up	0.0943709	0.145693	0.0805307	0.20023	0.231002	0.3213	0.106865	0.250844	#N/A	#N/A	#N/A
Chr12_20596715_20609451	MSTRG.29174	17.0137	4.08862	0.0386896	0.150366	yes	up	0	0	0	0.0193771	0.0144376	0.0298884	0	0.0212344	0	0	TKS34218.1
Chr12_21184224_21202762	Pig.11854	24.6642	4.62434	0.00571542	0.04088	yes	up	0	0	0	0.0193771	0.0505317	0.0224163	0	0.030775	TAOK1-202	PREDICTED: serine/threonine-protein kinase TAO1 [Camelus ferus]	NP_001193029.1
Chr12_21186043_21202762	Pig.11854	5.7103	2.51357	0.0483004	0.172978	yes	up	0	0.0153361	0.0123893	0.0710492	0.036094	0.0523047	0.00924181	0.0531493	TAOK1-202	PREDICTED: serine/threonine-protein kinase TAO1 [Camelus ferus]	NP_001193029.1
Chr12_24083408_24096439	Pig.11798	0.312018	-1.6803	0.0251507	0.110265	yes	down	0.0629139	0.0536764	0.0991147	0.0387541	0.0288752	0	0.0719017	0.0225431	RHOT1-201	PREDICTED: mitochondrial Rho GTPase 1, partial [Manis javanica]	XP_003797228.1
Chr12_27226046_27254638		0.0451399	-4.46945	0.0221668	0.101415	yes	down	0.0440398	0.0230042	0.018584	0	0	0	0.0285426	0	#N/A	#N/A	#N/A
Chr12_27312206_27315092	MSTRG.29412	2.99271e+06	21.513	6.05409e-06	0.000204965	yes	up	0	0	0	0	1.00341	0.134498	0	0.379304	0	0	XP_020923050.1
Chr12_27312206_27337243	MSTRG.29412	14.5826	3.86617	0.0143244	0.075513	yes	up	0	0	0.0123893	0.122721	0.0721881	0	0.00412978	0.0649698	0	0	XP_020923050.1
Chr12_27312206_27348924	MSTRG.29412,Pig.11225	6.57883	2.71783	0.0153449	0.0796524	yes	up	0.18245	0.107353	0.037168	1.17554	0.960102	0.0298884	0.10899	0.721844	#N/A	#N/A	#N/A
Chr12_27337142_27348924	MSTRG.29412	32.2305	5.01035	0.000823783	0.00954399	yes	up	0.0188742	0.0460083	0.037168	0.917181	0.664131	1.77089	0.0340168	1.1174	0	0	XP_020923050.1
Chr12_27353284_27357916	MSTRG.29412,Pig.11225	42.2793	5.40188	0.00956147	0.0576907	yes	up	0	0	0	0.0387541	0.0144376	0.104609	0	0.0526004	#N/A	#N/A	#N/A
Chr12_27998262_28002402	Pig.11217	3.95559	1.98389	0.00172092	0.0168065	yes	up	0.0251656	0.0306722	0.0309733	0.142098	0.108282	0.0971373	0.028937	0.115839	ACACA-203	acetyl-CoA carboxylase 1 isoform X1 [Sus scrofa]	XP_020921886.1
Chr12_28048634_28069283	Pig.11217	27.0785	4.75907	0.0226242	1	yes	up	0	0	0	0.0193771	0.0144376	0.0672489	0	0.0336879	ACACA-203	acetyl-CoA carboxylase 1 isoform X1 [Sus scrofa]	XP_020921886.1
Chr12_28082367_28086865	Pig.11217	9.44318	3.23927	3.65814e-10	3.48323e-08	yes	up	0.0692053	0.0153361	0.0433627	0.471508	0.440347	0.336244	0.0426347	0.416033	ACACA-203	acetyl-CoA carboxylase 1 isoform X1 [Sus scrofa]	XP_020921886.1
Chr12_28100174_28155621	Pig.11217	30.9578	4.95223	0.0262715	1	yes	up	0	0	0	0.0581312	0.0433129	0.0149442	0	0.0387961	ACACA-203	acetyl-CoA carboxylase 1 isoform X1 [Sus scrofa]	XP_020921886.1
Chr12_28706704_28716342	Pig.11211	0.128841	-2.95634	0.00986647	0.0585798	yes	down	0.0754967	0.0383403	0.0433627	0.0193771	0	0	0.0523999	0.00645902	GGNBP2-201	gametogenetin-binding protein 2 isoform X2 [Sus scrofa]	XP_005669082.2
Chr12_30652472_30656518	Pig.11189	45.3231	5.50217	0.000288344	0.00418374	yes	up	0	0	0	0.0516721	0.0433129	0.074721	0	0.0565687	RPS6KB1-203	ribosomal protein S6 kinase beta-1 isoform X1 [Sus scrofa]	XP_003131719.1
Chr12_30680004_30683029	Pig.11189	5.82799	2.543	0.0413369	0.157337	yes	up	0.0125828	0	0	0.0193771	0.036094	0.0224163	0.00419426	0.0259625	RPS6KB1-203	ribosomal protein S6 kinase beta-1 isoform X1 [Sus scrofa]	XP_003131719.1
Chr12_30845859_30853831		0.0191081	-5.70967	5.64075e-05	0.00117722	yes	down	0.0629139	0.0690125	0.0681414	0	0	0	0.0666893	0	#N/A	#N/A	#N/A
Chr12_31796253_31823882	Pig.11176	2.70919	1.43786	0.00225112	0.0210266	yes	up	0.0377484	0.0613444	0.0433627	0.12918	0.108282	0.149442	0.0474852	0.128968	RAD51C-201	DNA repair protein RAD51 homolog 3 isoform X1 [Sus scrofa]	XP_020922938.1
Chr12_3458862_3478097	Pig.19814	0.0963983	-3.37485	0.0412682	1	yes	down	0.0251656	0.0153361	0	0	0	0	0.0135006	0	EIF4A3-201	eukaryotic initiation factor 4A-III [Bos taurus]	NP_001039653.1
Chr12_3474168_3478097	Pig.19814	0.157581	-2.66584	0.000110972	0.00203693	yes	down	0.0754967	0.0920166	0.136283	0.0193771	0.0288752	0	0.101265	0.0160841	EIF4A3-201	eukaryotic initiation factor 4A-III [Bos taurus]	NP_001039653.1
Chr12_35602425_35606295	MSTRG.29616,Pig.13391	0.062378	-4.00282	0.0141784	0.0751333	yes	down	0.0188742	0.0306722	0.0123893	0	0	0	0.0206452	0	#N/A	#N/A	#N/A
Chr12_40853263_40853381	MSTRG.29689	12.1365	3.60128	0.000634141	0.00769812	yes	up	0	0.0306722	0	0.103344	0.0577505	0.186802	0.0102241	0.115966	0	0	OWK14899.1
Chr12_47059189_47062026		11.8342	3.56489	0.00119213	0.0125256	yes	up	0	0.0230042	0	0.0968853	0.101063	0.0523047	0.00766805	0.0834178	#N/A	#N/A	#N/A
Chr12_48467152_48485307		0.00783662	-6.99555	0.00749508	0.0485904	yes	down	0	0.222373	0.253981	0	0	0	0.158785	0	#N/A	#N/A	#N/A
Chr12_48468550_48486979		172.766	7.43268	1.03183e-05	0.000302306	yes	up	0	0	0	0.245443	0.0577505	0.343716	0	0.215637	#N/A	#N/A	#N/A
[truncated: 333 more rows]

## Sheet: N90_F vs N150D_F_DEcircRNAs
circRNA id	Host gene id	FC(N150D_F/N90D_F)	Log2FC(N150D_F/N90D_F)	Pvalue	Padjust	Significant	Regulate	N90D_F1	N90D_F2	N90D_F3	N150D_F1	N150D_F2	N150D_F3	N90D_F	N150D_F	gene_name	description	nr_hit_name
[truncated: 580 more rows]

[truncated: 1 more sheets: N150_F vs N210D_F_DEcircRNAs]
